# Supplementary material
Source: PubMed Central journal article supplement (PMC6451869)
Supplement: NIHMS1512581-supplement-1.pdf [file NIHMS1512581-supplement-1.pdf]

## Supplemental Materials

### Transcriptional and Functional Diversity of Human Macrophage Repolarization

Sina A. Gharib MD<sup>1,†,§</sup>, Ryan S. McMahan PhD<sup>2,†</sup>, William E. Eddy, PhD<sup>1</sup>, Matthew E. Long PhD<sup>1</sup>, William C. Parks PhD<sup>3</sup>, Moira L. Aitken MD<sup>1</sup>, Anne M. Manicone MD<sup>1,†,§</sup>

<sup>1</sup>Division of Pulmonary, Critical Care and Sleep Medicine, <sup>2</sup>Department of Environmental and Occupational Health Sciences, University of Washington, Seattle, WA 98109 <sup>3</sup>Women's Guild Lung Institute, Cedars-Sinai Medical Center, Los Angeles, CA

<sup>†</sup>contributed equally

## **Supplementary Methods**

### **Donors**

Human subjects provided informed written consent for blood donation at the University of Washington Medical Center as approved by the Institutional Review Boards of the University of Washington and Seattle Children's Research Institute. Blood from 6 CF patients (4 males, 2 females) ages 27-32 ( $28.50 \pm 1.97$  years) and from 6 healthy volunteers (4 males, 2 females) ages 25-31 ( $26.33.0 \pm 3.32$  years) was drawn into EDTA-coated tubes. All CF patients were non-Hispanic Caucasian, and homozygous for F508del. Exclusion criteria included active exacerbation, current corticosteroid or NSAID use, and CF-related diabetes.

### **Monocyte Isolation and Culture**

Peripheral blood mononuclear cells (PBMC) were isolated from whole blood using Lymphoprep (StemCell Technologies, Vancouver, BC, Canada). PBMC were enriched for monocytes using the Dynabeads Untouched Human Monocytes Kit (Life Technologies, Carlsbad, CA), per manufacturer instructions. Monocytes were plated at a density of  $1.1 \times 10^3$  cells/mm<sup>2</sup> and differentiated for 7 days in RPMI 1640 supplemented with 100 ng/ml human M-CSF (PeproTech, Rocky Hill, NJ) to generate monocyte-derived macrophages (MDMs).

### **Macrophage Polarization Protocol**

After 7 days of differentiation, non-adherent cells were removed, and remaining MDMs were considered to be in a non-polarized, M0 state. M1 polarization was achieved by treating M0 MDM with culture media containing *E. Coli* O111:B4 LPS (100 ng/ml; Sigma-Aldrich, St. Louis, MO) for 24 h, at which LPS media was aspirated, and MDMs were rinsed three times with PBS. M1 MDMs were then cultured in MDM media alone (control) or supplemented with IL-4 (10 ng/ml), IL-10 (50 ng/ml), methylprednisolone (100 nM), azithromycin (30 $\mu$ m), or apoptotic PMNs (5:1) for 24 h to repolarize MDMs towards an M2 state.

### **Microarray Experiments**

Total RNA from macrophages was isolated and purified using the RNeasy Micro Kit (Qiagen, Valencia, CA). RNA quality analysis, preparation, array hybridization, and scanning were performed at the Genomics and Microarray Core Facility at the University of Texas Southwestern Medical Center using the Illumina HumanHT-12 v4 BeadChips (Illumina, Inc., San Diego, CA). Total RNA from macrophages was isolated and purified using the RNeasy Micro Kit (Qiagen, Valencia, CA). All RNA samples were of high quality (RIN>7) as assessed by an Agilent 2100 Bioanalyzer (Agilent Technologies, Santa Clara, CA). Raw probe intensities for all 72 samples (6 conditions for 6 CF and 6 non-CF subjects), underwent variance stabilization and quantile normalization using the Bioconductor package *lumi*<sup>1</sup>. Detailed microarray information and raw data have been deposited at Gene Expression Omnibus (<http://www.ncbi.nlm.nih.gov/geo>, GSE100521).

### **Differential Gene Expression Analysis**

For each M2 stimulus, differential gene expression between M1 (baseline) vs. M2 polarized cells was determined using a Bayesian implementation of the paired *t*-test on log<sub>2</sub>-transformed probe intensities<sup>2</sup>. Multiple hypothesis testing was addressed using Benjamini-Hochberg's false discovery rate (FDR) analysis with an FDR < 0.01 designating significant differential gene expression. Principal Component Analysis (PCA), a procedure for producing low-dimensional projections of high dimensional data, was also performed on differentially expressed genes based on transcriptional variability across all samples.

### **Pathway Analysis**

To identify MDM transcriptional programs activated in response to M2-promoting stimuli, we applied Gene Set Enrichment Analysis (GSEA) using 7,220 well-curated gene sets comprised of canonical biological pathways (Hallmark, KEGG, Reactome, Biocarta, etc) and Gene Ontology (GO) annotations<sup>3</sup>. An FDR < 0.05 was used to determine statistical significance based on 1,000 random gene set permutations. Network visualization of GSEA results was

performed using Enrichment Map<sup>4</sup>, a plug-in application within the open source bioinformatics software platform Cytoscape<sup>5</sup>.

### **qPCR**

qPCR was performed as described<sup>6</sup> using FAM-labeled TaqMan probes (Life Technologies) for *Il6*, *Tnf*, *Il12b*, *Cxcl1*, *Cxcl2*, *Cxcl8*, *Il1b*, and *Hprt*. The  $\Delta\Delta C_t$  was the average  $\Delta C_t$  for a given treatment minus the average  $\Delta C_t$  of the indicated normalization sample. The data are expressed as relative quantification (RQ) or fold change, which is calculated as  $2^{-\Delta\Delta C_t}$ .

### **Neutrophil Isolation and Induction of Apoptosis**

Neutrophils (PMN) were isolated from whole blood by Dextran (Pharmacosmos A/S, Holbaek, Denmark) sedimentation followed by density gradient centrifugation as described in supplemental materials. Briefly, equal volumes blood and sterile Dextran (3% w/v in 0.9% NaCl) were mixed and incubated for 20 min to allow RBC sedimentation. The supernatant was collected and centrifuged for 10 min at 500 x g at 4°C. The cell pellet was resuspended in 0.9% NaCl, then underlayered with Ficoll-Paque Plus (GE Healthcare Bio-Sciences AB, Uppsala, Sweden) and centrifuged for 40 min at 400 x g at 25°C. After removal of the supernatant and mononuclear cell layer, RBCs were lysed by resuspension of the cell pellet in H<sub>2</sub>O for 30 sec. Isotonicity was immediately restored by addition of equal volume 1.8% NaCl. The suspension was centrifuged for 5 min at 280 x g at 4°C and the pellet of neutrophils was resuspended in PBS without Ca<sup>++</sup> and Mg<sup>++</sup>. PMN purity was confirmed by cyto-spin and staining with Diff-Quik (Siemens Healthcare Diagnostics Inc., Tarrytown, NY). PMN to be used in efferocytosis assays were labeled using the CellTrace CFSE Cell Proliferation Kit (Life Technologies) according to manufacturer's instructions. PMN were diluted to a concentration of 5x10<sup>6</sup> cells/ml in MDM media and rotated at 25°C for 24-48 h in 15-ml tubes covered with Breathe-Easy film (USA Scientific, Inc., Ocala, FL) for sterile, age-induced apoptosis. To determine the extent of apoptosis, cells were stained with Annexin V-FITC and propidium iodide (BioVision Inc.,

Milpitas, CA) per manufacturer's protocol. Cells were analyzed by flow cytometry immediately after staining to measure the percentage of apoptotic PMN (Annexin V<sup>+</sup> PI<sup>-</sup>).

### **Efferocytosis Assay**

After 24 h treatment with stimuli for M2 repolarization or media change, MDM culture media was replaced with fresh MDM media containing CFSE-labeled apoptotic neutrophils at a ratio of 5:1 PMN:MDM. After 2 h incubation, the media was aspirated and MDMs were gently washed with PBS to remove uningested PMN. MDMs were detached by incubation in PBS with 1mM EDTA for 5-10 min. MDMs were stained with CD14-PE (eBioscience) and fixed for next-day analysis. The proportion of MDMs that ingested or bound at least one PMN (CD14<sup>+</sup>CFSE<sup>+</sup>) was determined by analysis on a BD FACSCanto RUO flow cytometer (BD Biosciences, San Jose, CA). Flow cytometry data analysis was performed using Flowjo software (Tree Star Inc., Ashland, OR). MFI represents the mean fluorescent intensity of the CFSE signal within the CD14<sup>+</sup>CFSE<sup>+</sup> population.

### **Image Flow Cytometry**

Select samples from the efferocytosis assay were further analyzed on an Amnis ImageStreamX Mark II Imaging Flow Cytometer (EMD Millipore, Billerica, MA). After data acquisition on the standard flow cytometer, remaining cells from select samples were transferred to low retention 1.5 ml microcentrifuge tubes and centrifuged at 400 x g for 5 min at 4°C. Supernatants were aspirated and cell pellets were suspended in 40 µl of 10 µg/ml DAPI (Molecular Probes NL5995050) in PBS. Single color controls were suspended in FACS buffer alone (PBS + 1% FBS + 2mM EDTA). This analysis captured images for each cell in several channels: brightfield, PE (CD14), FITC (CFSE), and DAPI (nuclei).

### **Animal Experiments**

*Stat6*<sup>-/-</sup> mice on a BALB/c background, BALB/c mice, *Il10r*<sup>-/-</sup> mice on a C57Bl/6 background and C57Bl/6 mice were obtained from Jackson Laboratory (Bar Harbor, ME) and matched for age and gender. Mice were maintained under specific pathogen free conditions.

Animal procedures were approved by the Institutional Animal Care and Use Committees at the University of Washington.

### **Murine Bone Marrow-Derived Macrophages (BMDM)**

Bone marrow was collected from femurs and tibias of C57Bl/6, BALB/c, *Stat6*<sup>-/-</sup>, and *Il10*<sup>r/-</sup> mice as described<sup>7</sup>. On day 7, cells were re-plated and received stimulation with *E. coli* LPS (10 ng/ml for 24 h) or control media. After 24 h, cells were washed and recombinant murine IL-4, IL-10, (10 ng/ml; Life Technologies) or control media were added to cultures for 24 h. At this time, cells were washed and received re-challenge with LPS or control media. At 4-6 h, cells were collected and processed for mRNA.

### **Statistical Analysis**

Statistical significance was determined using Student's t-test (two-sided) after passing normality assumption (Shapiro-Wilk normality test), or Mann Whitney test for non-normally distributed data using Prism software (GraphPad Software, Inc, La Jolla, CA). For multiple comparisons, statistical analysis was performed by 2-way ANOVA with Bonferroni post-test. Data are presented as mean ± SEM, with  $p < 0.05$  considered statistically significant.

### **Transcriptional Analysis of Macrophage Polarization in Allergen-induced Asthma**

We obtained publicly available RNA-sequencing data (<http://www.ncbi.nlm.nih.gov/geo>, GSE65039) on alveolar macrophages harvested at baseline and following bronchial provocation with allergen from a subject with mild asthma on no asthma-controlling medications. This carefully designed protocol has been previously published<sup>8</sup>. In brief, the subject underwent screening for inclusion and exclusion criteria that included skin prick testing to house dust mite, short ragweed, and cockroach. To obtain the prechallenge bronchial sample, bronchoalveolar lavage (BAL) was performed at a subsegmental bronchus before allergen challenge. Subsegmental bronchoprovocation with an identified allergen was performed in a different subsegment. 48 hours after the initial bronchoscopy. Alveolar macrophages were purified from BALF using Percall gradient method and adhesion purification. RNA was harvested using

PureLink RNA micro Scale kit (Life Technologies) and 1  $\mu$ g of total RNA was used for the construction of sequencing libraries. Next-generation sequencing data were generated using an Illumina HiSeq2000 system. Transcripts with less than 3 counts across conditions were filtered, and exploratory statistical analysis on the remaining 23,490 transcripts based on expression differences was performed using DESeq2 program in R environment<sup>9</sup>. We next created 10 gene sets corresponding to differentially up- and down-regulated genes (FDR < 0.01, absolute fold-change > 1.5) from the five M2-polarizing stimuli based on our microarray experiments on non-CF subjects: “Induced in response to IL-4”, “Induced in response to IL-10”, “Induced in response to AZM”, “Induced in response to MP”, “Induced in response to PMN”, “Suppressed in response to L-4”, “Suppressed in response to IL-10”, “Suppressed in response to AZM”, “Suppressed in response to MP”, “Suppressed in response to PMN” (see supplemental Tables). We combined these “M2” gene sets with 1370 canonical biological pathways (Hallmark, KEGG, Reactome, Biocarta, etc) and performed GSEA on statistically rank-ordered gene list from pre vs. post allergen-exposed alveolar macrophages. An FDR < 0.05 was used to determine statistical significance based on 1,000 random gene set permutations.

## References

1. Du P, Kibbe WA, Lin SM. lumi: a pipeline for processing Illumina microarray. *Bioinformatics* 2008; 24:1547-8.
2. Kayala MA, Baldi P. Cyber-T web server: differential analysis of high-throughput data. *Nucleic Acids Res* 2012; 40:W553-9.
3. Subramanian A, Tamayo P, Mootha VK, Mukherjee S, Ebert BL, Gillette MA, et al. Gene set enrichment analysis: a knowledge-based approach for interpreting genome-wide expression profiles. *Proc Natl Acad Sci U S A* 2005; 102:15545-50.
4. Isserlin R, Merico D, Voisin V, Bader GD. Enrichment Map - a Cytoscape app to visualize and explore OMICs pathway enrichment results. *F1000Res* 2014; 3:141.
5. Cline MS, Smoot M, Cerami E, Kuchinsky A, Landys N, Workman C, et al. Integration of biological networks and gene expression data using Cytoscape. *Nat Protoc* 2007; 2:2366-82.
6. Gharib SA, Johnston LK, Huizar I, Birkland TP, Hanson J, Wang Y, et al. MMP28 promotes macrophage polarization toward M2 cells and augments pulmonary fibrosis. *J Leukoc Biol* 2014; 95:9-18.
7. Manicone AM, Birkland TP, Lin M, Betsuyaku T, van Rooijen N, Lohi J, et al. Epilysin (MMP-28) restrains early macrophage recruitment in *Pseudomonas aeruginosa* pneumonia. *J Immunol* 2009; 182:3866-76.
8. Park GY, Lee YG, Berdyshev E, Nyenhuis S, Du J, Fu P, et al. Autotaxin production of lysophosphatidic acid mediates allergic asthmatic inflammation. *Am J Respir Crit Care Med* 2013; 188:928-40.
9. Love MI, Huber W, Anders S. Moderated estimation of fold change and dispersion for RNA-seq data with DESeq2. *Genome Biol* 2014; 15:550.



## Supplemental Figure Legends

### Supplemental Figure E1. Consequences of M2 repolarization on LPS re-challenge is

**independent of CFTR.** Monocyte-derived macrophages from 6 non-CF donors (grey box) and 6 CF donors (white box) were stimulated with LPS followed by M2 stimuli or control medium and then rechallenged with LPS. Each donor's samples were normalized to HPRT and expressed as fold change over their respective non-LPS treated samples. (A-D) For *Il1b*, *Il6*, *Cxcl1*, and *Cxcl2*, IL-4 exposure decreased the ability of the macrophage to produce pro-inflammatory cytokines, and IL-10 reversed LPS tolerance independent of genotype. (Mean  $\pm$  SEM; n=6/group). \*p value <0.05.

### Supplemental Figure E2. M2 stimuli have varying ability to promote macrophage

**efferocytosis and are independent of functional CFTR.** (A) Fold change in percentage of macrophages positive for ingested apoptotic PMNs (PMN) relative to their respective media-only controls. (B) Fold change in CFSE MFI in macrophages relative to their respective media-only controls. \*p value <0.05 M2 stimuli vs. genotype-matched non-CF media control. #p value <0.05 AZM=azithromycin, MP=methylprednisolone, PMN=apoptotic PMNs, MFI=Mean fluorescence intensity. (Mean  $\pm$  SEM; n=6/group).

### Supplemental Figure E3. Heatmap depiction of common and divergent interferon

**signaling genes across M2 stimuli.** For each M2 stimulus of non-CF MDMs, we extracted "leading edge" gene members of enriched interferon-associated pathways from our gene set enrichment analysis (GSEA). "Leading edge" refers to those genes that are the primary drivers of the statistical enrichment of a given gene set in GSEA. Red boxes denote membership of a given gene in interferon-associated pathway, and gray boxes depict non-membership. Note that very few genes are common to all polarizing stimuli, with substantial gene-specific variability

across M2 conditions. Please also refer to Supplemental Table E4 for complete list and membership profiles.

**Supplemental Figure E4. Differential enrichment of lipid-associated transcriptional**

**programs in response to apoptotic PMNs.** (A) Integrated network and gene set analysis

revealed that stimulation of macrophages with aPMNs activated cholesterol transport pathways

while suppressing processes involved in cholesterol biosynthesis. (B) A heatmap depicting the

distinctive expression pattern between select genes mapping to lipid efflux versus those

associated with fat metabolism. These genes were “leading edge” members derived from GSEA

of non-CF MDMs treated with aPMNs.



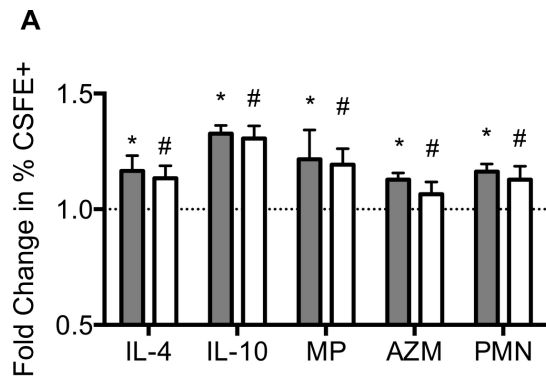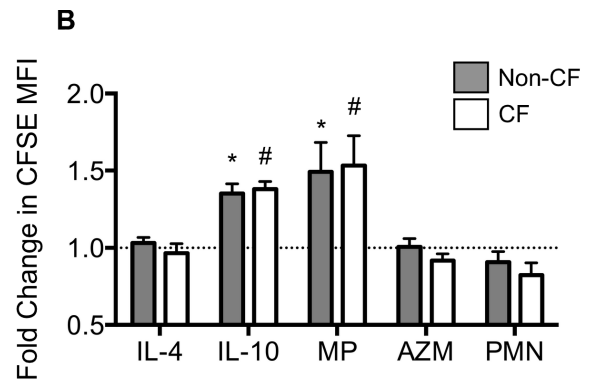



**A. Pathway enrichment map of macrophages in response to PMNs**

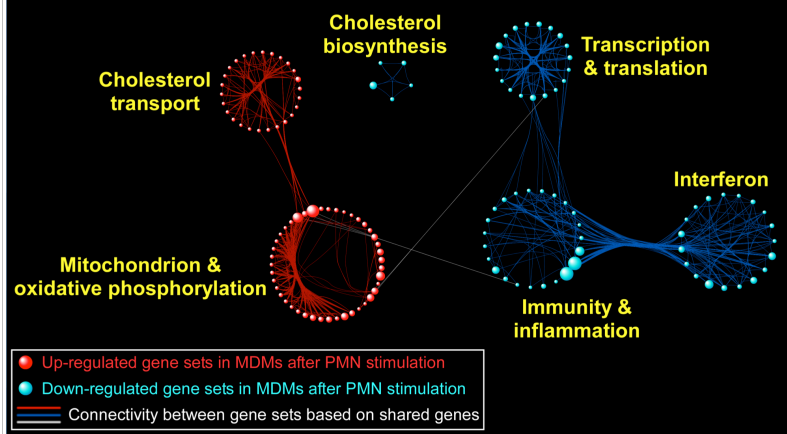

**B.**

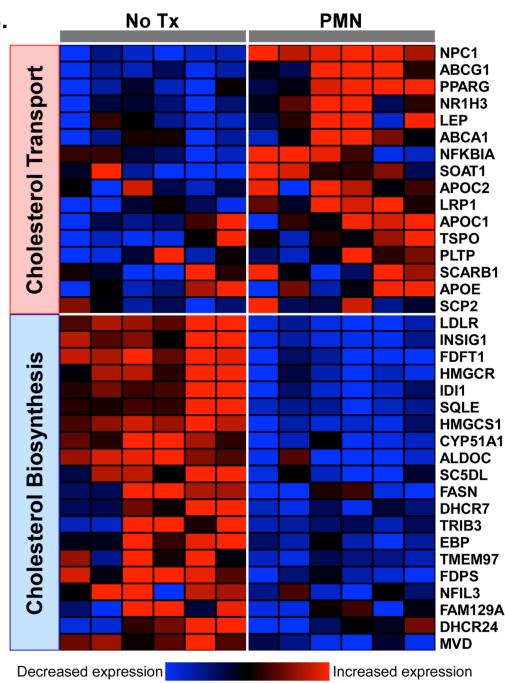

**Supplemental Table E1.** List of differentially expressed genes in MDMs of non-CF subjects exposed to 5 different M2 stimuli. FDR: false discovery rate.

| IL10         |              |          |                              |
|--------------|--------------|----------|------------------------------|
| ProbeID      | Gene Symbol  | FDR      | Log <sub>2</sub> [IL10/NoTx] |
| ILMN_1746888 | PCOLCE2      | 9.90E-07 | 2.11                         |
| ILMN_2092118 | FPR1         | 9.90E-07 | 1.88                         |
| ILMN_1687301 | VCAN         | 2.06E-06 | 1.42                         |
| ILMN_1720998 | CA12         | 3.79E-06 | 1.39                         |
| ILMN_3272741 | LOC100130520 | 3.79E-06 | 1.20                         |
| ILMN_2176063 | FCGR1A       | 1.07E-05 | 1.54                         |
| ILMN_1812091 | FAM20A       | 1.71E-05 | 1.04                         |
| ILMN_1791726 | TUBB3        | 1.71E-05 | 1.22                         |
| ILMN_1748538 | ALDH1A2      | 1.89E-05 | 0.97                         |
| ILMN_2129505 | CYBASC3      | 1.95E-05 | -1.17                        |
| ILMN_1781001 | SOCS3        | 2.15E-05 | 0.97                         |
| ILMN_1751228 | C20orf46     | 2.15E-05 | 1.01                         |
| ILMN_1764030 | CCL23        | 2.15E-05 | 1.13                         |
| ILMN_2239754 | IFIT3        | 2.20E-05 | -1.03                        |
| ILMN_1706498 | DSE          | 2.31E-05 | 1.22                         |
| ILMN_2064725 | METTL7B      | 2.31E-05 | 1.32                         |
| ILMN_1747355 | CCL3L1       | 2.31E-05 | 1.12                         |
| ILMN_1667966 | C1orf24      | 2.31E-05 | 1.23                         |
| ILMN_1682993 | NKG7         | 2.31E-05 | 1.53                         |
| ILMN_2261600 | FCGR1B       | 2.57E-05 | 1.57                         |
| ILMN_3238196 | CYTH4        | 2.58E-05 | 1.12                         |
| ILMN_1654389 | LOC728744    | 2.71E-05 | 1.36                         |
| ILMN_1691364 | STAT1        | 2.78E-05 | -0.90                        |
| ILMN_1671509 | CCL3         | 2.78E-05 | 1.15                         |
| ILMN_1798971 | FZD5         | 2.78E-05 | 0.65                         |
| ILMN_1690105 | STAT1        | 2.78E-05 | -0.99                        |
| ILMN_1695316 | SLC39A8      | 2.78E-05 | 1.04                         |
| ILMN_2393296 | GK           | 2.78E-05 | 0.96                         |
| ILMN_1751904 | EDNRB        | 2.78E-05 | 0.83                         |
| ILMN_2122103 | ETS1         | 2.85E-05 | 0.56                         |
| ILMN_2196550 | C13orf18     | 2.85E-05 | 1.02                         |
| ILMN_2218856 | CCL3L1       | 3.08E-05 | 1.00                         |
| ILMN_1722158 | CASP5        | 3.08E-05 | 0.66                         |
| ILMN_2105573 | CCL3L3       | 3.08E-05 | 1.18                         |
| ILMN_1815023 | PIM1         | 3.09E-05 | 1.64                         |
| ILMN_1676980 | MTSS1        | 3.16E-05 | 0.74                         |
| ILMN_2145116 | TMEM173      | 3.26E-05 | 1.03                         |
| ILMN_3247506 | FCGR1C       | 3.52E-05 | 1.23                         |
| ILMN_1655549 | SIGLEC10     | 3.64E-05 | 1.11                         |

|              |              |          |       |
|--------------|--------------|----------|-------|
| ILMN_1701789 | IFIT3        | 3.80E-05 | -1.14 |
| ILMN_2289593 | FXYD2        | 3.85E-05 | -0.83 |
| ILMN_1733270 | CD163        | 4.21E-05 | 1.82  |
| ILMN_1686109 | CCL23        | 4.25E-05 | 1.11  |
| ILMN_1711361 | ZNF319       | 4.31E-05 | 0.74  |
| ILMN_1664761 | TMEM138      | 4.62E-05 | -1.11 |
| ILMN_1755873 | EMR3         | 5.01E-05 | -0.35 |
| ILMN_1692295 | MYO1G        | 5.16E-05 | 0.84  |
| ILMN_1775257 | PROK2        | 5.81E-05 | 0.78  |
| ILMN_2073289 | MTSS1        | 7.52E-05 | 1.05  |
| ILMN_1810725 | FAM129A      | 7.52E-05 | 1.05  |
| ILMN_3248591 | LTBP2        | 7.52E-05 | 0.60  |
| ILMN_1768812 | FXYD6        | 7.52E-05 | -0.45 |
| ILMN_3182768 | LOC100130520 | 7.52E-05 | 0.45  |
| ILMN_1665865 | IGFBP4       | 7.52E-05 | 0.59  |
| ILMN_1660624 | LIMK2        | 7.52E-05 | 0.36  |
| ILMN_1742981 | TUBA1A       | 7.52E-05 | 1.40  |
| ILMN_1764228 | DAB2         | 7.52E-05 | 0.76  |
| ILMN_1671928 | PROS1        | 7.52E-05 | 0.80  |
| ILMN_2348487 | EMR3         | 7.52E-05 | -1.12 |
| ILMN_1729801 | S100A8       | 7.58E-05 | 0.66  |
| ILMN_1722622 | CD163        | 7.73E-05 | 1.68  |
| ILMN_1768284 | P2RY8        | 8.06E-05 | -0.67 |
| ILMN_1725471 | GK           | 1.05E-04 | 0.91  |
| ILMN_1777325 | STAT1        | 1.05E-04 | -0.82 |
| ILMN_1664543 | IFIT3        | 1.06E-04 | -0.48 |
| ILMN_1750974 | S100A9       | 1.06E-04 | 0.98  |
| ILMN_1771385 | GBP4         | 1.06E-04 | -0.64 |
| ILMN_1791576 | CHSY1        | 1.06E-04 | 0.96  |
| ILMN_3294741 | LOC6444496   | 1.15E-04 | 0.85  |
| ILMN_1775708 | SLC2A3       | 1.17E-04 | 0.90  |
| ILMN_2391051 | FCGR1B       | 1.24E-04 | 1.19  |
| ILMN_1773388 | C13orf18     | 1.28E-04 | 0.95  |
| ILMN_1784661 | TMEM2        | 1.29E-04 | 0.92  |
| ILMN_1703142 | 42065        | 1.48E-04 | 1.06  |
| ILMN_1723912 | IFI44L       | 1.51E-04 | -1.04 |
| ILMN_2044453 | LPAR5        | 1.57E-04 | 0.54  |
| ILMN_1739428 | IFIT2        | 1.60E-04 | -0.93 |
| ILMN_1691127 | VTN          | 1.62E-04 | 0.77  |
| ILMN_2379599 | CD163        | 1.62E-04 | 1.64  |
| ILMN_2326273 | CHI3L2       | 1.62E-04 | 0.99  |
| ILMN_1660086 | MYH11        | 1.64E-04 | 1.10  |
| ILMN_1694757 | CTSL1        | 1.66E-04 | 0.99  |
| ILMN_1711611 | LOC653907    | 1.69E-04 | 0.51  |
| ILMN_1747347 | C17orf60     | 1.69E-04 | 0.82  |
| ILMN_1767809 | DNAJC25-     | 1.76E-04 | 0.55  |



| GNG10        |           |          |       |
|--------------|-----------|----------|-------|
| ILMN_1804735 | CBS       | 1.77E-04 | 0.92  |
| ILMN_1664094 | P2RY13    | 1.79E-04 | 0.53  |
| ILMN_1766657 | STOM      | 1.81E-04 | 1.04  |
| ILMN_1767900 | LGI2      | 1.81E-04 | 0.47  |
| ILMN_1735930 | KLF2      | 1.81E-04 | 0.98  |
| ILMN_1682099 | TNFAIP8L3 | 1.84E-04 | 0.50  |
| ILMN_1814305 | SAMD9     | 1.84E-04 | -0.69 |
| ILMN_1683792 | LAP3      | 1.86E-04 | 0.78  |
| ILMN_1779886 | TBC1D14   | 1.94E-04 | 0.71  |
| ILMN_1653711 | FZD2      | 2.12E-04 | 0.82  |
| ILMN_2353633 | EMR2      | 2.12E-04 | 0.81  |
| ILMN_1765557 | OLFML2B   | 2.12E-04 | 1.04  |
| ILMN_1652185 | IL4R      | 2.24E-04 | 0.62  |
| ILMN_1758673 | SLC44A1   | 2.24E-04 | -0.74 |
| ILMN_2075643 | ANKRD29   | 2.24E-04 | 0.58  |
| ILMN_2371911 | MUC1      | 2.25E-04 | 0.42  |
| ILMN_2121816 | GPR137B   | 2.42E-04 | 0.80  |
| ILMN_1805827 | PPA1      | 2.42E-04 | 0.96  |
| ILMN_1757074 | GNG10     | 2.51E-04 | 1.00  |
| ILMN_1793598 | APIP      | 2.52E-04 | 0.89  |
| ILMN_2148819 | TUBA1A    | 2.59E-04 | 0.73  |
| ILMN_2342066 | METRNL    | 2.66E-04 | 0.55  |
| ILMN_1729749 | HERC5     | 2.76E-04 | -0.91 |
| ILMN_1791511 | TMEM176A  | 2.83E-04 | 0.79  |
| ILMN_2373791 | ENPP2     | 2.83E-04 | 1.74  |
| ILMN_1654411 | CCL18     | 2.83E-04 | 1.11  |
| ILMN_1801610 | METRNL    | 2.83E-04 | 0.66  |
| ILMN_1674811 | OASL      | 3.01E-04 | -0.53 |
| ILMN_2112988 | NCF1C     | 3.01E-04 | -0.88 |
| ILMN_1679620 | LOC728519 | 3.01E-04 | 0.70  |
| ILMN_1759818 | SORL1     | 3.05E-04 | -0.52 |
| ILMN_2323933 | LAIR2     | 3.05E-04 | 0.78  |
| ILMN_1700268 | QPRT      | 3.12E-04 | -0.92 |
| ILMN_1749521 | SLC35E3   | 3.13E-04 | -0.72 |
| ILMN_2400030 | PTPN2     | 3.21E-04 | 0.82  |
| ILMN_1780799 | ENPP2     | 3.25E-04 | 1.74  |
| ILMN_1798204 | IL21R     | 3.30E-04 | 0.73  |
| ILMN_1657871 | RSAD2     | 3.40E-04 | -0.87 |
| ILMN_1656940 | ABLIM3    | 3.40E-04 | 0.30  |
| ILMN_1653026 | PLAC8     | 3.54E-04 | -0.60 |
| ILMN_1801584 | CXCR4     | 3.71E-04 | -0.67 |
| ILMN_1657435 | MT1M      | 3.72E-04 | 0.86  |
| ILMN_1718046 | ARNT2     | 3.97E-04 | 0.54  |
| ILMN_1759513 | RND3      | 3.99E-04 | 0.72  |
| ILMN_1755643 | MGAT4A    | 3.99E-04 | 0.77  |

|              |              |          |       |
|--------------|--------------|----------|-------|
| ILMN_1694548 | ANXA3        | 3.99E-04 | 0.45  |
| ILMN_1752008 | OTUD1        | 4.01E-04 | 0.56  |
| ILMN_1806015 | LOC391045    | 4.01E-04 | 0.46  |
| ILMN_3244550 | LOC642413    | 4.01E-04 | 0.62  |
| ILMN_1653496 | GLUL         | 4.01E-04 | 0.53  |
| ILMN_1814200 | BMP2K        | 4.15E-04 | 0.54  |
| ILMN_1711608 | SSBP2        | 4.28E-04 | 0.56  |
| ILMN_2234697 | BEX1         | 4.28E-04 | -1.31 |
| ILMN_1660364 | PSCD4        | 4.35E-04 | 0.87  |
| ILMN_1683774 | IL2RA        | 4.35E-04 | 0.55  |
| ILMN_3260618 | LOC100128086 | 4.35E-04 | 0.74  |
| ILMN_1748206 | C20orf160    | 4.56E-04 | 0.22  |
| ILMN_1801254 | LOC648984    | 4.57E-04 | 0.90  |
| ILMN_1835017 |              | 4.57E-04 | 0.61  |
| ILMN_1800602 | GCA          | 4.57E-04 | 0.90  |
| ILMN_2382942 | CA12         | 4.75E-04 | 0.57  |
| ILMN_1770768 | SLAMF1       | 4.75E-04 | 0.99  |
| ILMN_1687960 | LIMK2        | 4.92E-04 | 0.26  |
| ILMN_3242586 | RHOU         | 4.99E-04 | 0.82  |
| ILMN_1740015 | CD14         | 5.10E-04 | 0.69  |
| ILMN_2093343 | PLAC8        | 5.10E-04 | -0.75 |
| ILMN_2337789 | 42065        | 5.18E-04 | 0.67  |
| ILMN_1807491 | LAIR2        | 5.92E-04 | 0.73  |
| ILMN_3239965 | IDO1         | 6.25E-04 | -0.88 |
| ILMN_1718303 | PVRL2        | 6.26E-04 | 0.55  |
| ILMN_2060115 | SORL1        | 6.26E-04 | -0.51 |
| ILMN_1731503 | MARCO        | 6.28E-04 | 1.30  |
| ILMN_1674183 | MT1JP        | 6.29E-04 | 0.43  |
| ILMN_1697309 | NCF1         | 6.33E-04 | -1.03 |
| ILMN_1756862 | APOL3        | 6.42E-04 | -0.81 |
| ILMN_1741096 | FDFT1        | 6.56E-04 | -0.53 |
| ILMN_1760062 | IFI44        | 6.56E-04 | -0.66 |
| ILMN_1724789 | CD59         | 6.56E-04 | 0.48  |
| ILMN_1685625 | UCP2         | 6.56E-04 | 0.96  |
| ILMN_1799467 | SAMD9L       | 6.56E-04 | -0.54 |
| ILMN_1653871 | NAMPT        | 6.56E-04 | 1.14  |
| ILMN_1790689 | CRISPLD2     | 6.56E-04 | -0.79 |
| ILMN_1716859 | TDO2         | 6.68E-04 | 1.54  |
| ILMN_1670490 | PDPN         | 6.69E-04 | 0.84  |
| ILMN_2383707 | ALDH1A2      | 6.69E-04 | 0.35  |
| ILMN_3200140 | LOC645638    | 6.70E-04 | -0.96 |
| ILMN_3295494 | LOC389386    | 6.70E-04 | 0.74  |
| ILMN_1713759 | UBE2J1       | 6.70E-04 | 0.87  |
| ILMN_1668865 | SLC2A14      | 6.70E-04 | 0.41  |
| ILMN_1723141 | OTUD1        | 6.72E-04 | 0.67  |
| ILMN_1696419 | STOM         | 6.72E-04 | 1.05  |

|              |              |          |       |
|--------------|--------------|----------|-------|
| ILMN_1657442 | ADARB1       | 6.73E-04 | 0.19  |
| ILMN_1669592 | 42065        | 6.78E-04 | 0.92  |
| ILMN_1695829 | TTYH2        | 7.37E-04 | -0.44 |
| ILMN_1684440 | PXN          | 7.49E-04 | 0.38  |
| ILMN_1713807 | MAN1C1       | 7.49E-04 | 0.57  |
| ILMN_1707695 | IFIT1        | 7.50E-04 | -0.84 |
| ILMN_1710514 | BCL3         | 7.51E-04 | 0.77  |
| ILMN_2150258 | ZFP36L2      | 7.51E-04 | -0.62 |
| ILMN_1715508 | NNMT         | 7.51E-04 | 0.25  |
| ILMN_1693771 | ASPH         | 7.51E-04 | 0.61  |
| ILMN_1667460 | SULF2        | 7.51E-04 | -0.32 |
| ILMN_1773963 | GNA15        | 7.51E-04 | 0.62  |
| ILMN_2212763 | ICAM3        | 7.51E-04 | -0.64 |
| ILMN_1710495 | PAPLN        | 7.73E-04 | -0.58 |
| ILMN_1808811 | SBNO2        | 7.95E-04 | 0.47  |
| ILMN_1666444 | RBMS1        | 8.18E-04 | 0.74  |
| ILMN_1695290 | FERMT2       | 8.30E-04 | 0.27  |
| ILMN_2376108 | PSMB9        | 8.37E-04 | -0.55 |
| ILMN_2166457 | HPGD         | 8.37E-04 | 0.73  |
| ILMN_1727466 | KCNMB4       | 8.37E-04 | 0.48  |
| ILMN_1768469 | TCN1         | 8.37E-04 | 0.32  |
| ILMN_1719695 | NFKBIZ       | 8.63E-04 | 1.13  |
| ILMN_2317730 | ELMO2        | 8.69E-04 | 0.60  |
| ILMN_1688775 | METRNL       | 8.70E-04 | 0.78  |
| ILMN_2086077 | JUNB         | 8.83E-04 | 0.44  |
| ILMN_1677827 | TLR7         | 8.91E-04 | 0.45  |
| ILMN_1652003 | GNG10        | 9.25E-04 | 0.85  |
| ILMN_1737394 | LMNA         | 9.32E-04 | 0.56  |
| ILMN_1800078 | LMO2         | 9.41E-04 | 0.64  |
| ILMN_2312194 | CYB5A        | 9.55E-04 | -0.73 |
| ILMN_1799848 | ANKRD22      | 9.62E-04 | 0.45  |
| ILMN_2106725 | NCF1B        | 9.65E-04 | -0.44 |
| ILMN_1727689 | TNFAIP2      | 9.80E-04 | -0.43 |
| ILMN_1703946 | ADORA2B      | 9.80E-04 | -0.50 |
| ILMN_1690566 | RASSF4       | 9.86E-04 | 0.61  |
| ILMN_1753111 | NAMPT        | 9.89E-04 | 1.02  |
| ILMN_1693630 | C16orf7      | 1.04E-03 | 0.37  |
| ILMN_1774604 | PNKD         | 1.06E-03 | 0.72  |
| ILMN_1776115 | GSDMA        | 1.07E-03 | 0.35  |
| ILMN_1669409 | VSIG4        | 1.08E-03 | 0.80  |
| ILMN_3180196 | LOC100128086 | 1.10E-03 | 0.58  |
| ILMN_1684368 | C5orf62      | 1.19E-03 | 0.53  |
| ILMN_1880983 |              | 1.23E-03 | 0.49  |
| ILMN_2235851 | LINCR        | 1.23E-03 | -0.55 |
| ILMN_2320888 | CXCR4        | 1.23E-03 | -0.69 |
| ILMN_2289849 | FCGR2A       | 1.23E-03 | 0.61  |

|              |           |          |       |
|--------------|-----------|----------|-------|
| ILMN_1669881 | TSPAN13   | 1.23E-03 | 0.51  |
| ILMN_2086470 | PDGFRA    | 1.23E-03 | 0.51  |
| ILMN_1712708 | TRIM47    | 1.23E-03 | 0.44  |
| ILMN_1758418 | TNFSF13B  | 1.23E-03 | -0.66 |
| ILMN_1740418 | CYP27B1   | 1.23E-03 | 0.97  |
| ILMN_1745397 | OAS3      | 1.24E-03 | -0.67 |
| ILMN_1713505 | NPC1      | 1.27E-03 | 1.00  |
| ILMN_1732538 | LBP       | 1.32E-03 | 0.54  |
| ILMN_2299045 | BMP2K     | 1.32E-03 | 0.80  |
| ILMN_1742601 | CR1       | 1.32E-03 | 0.36  |
| ILMN_1751851 | CECR1     | 1.32E-03 | -0.63 |
| ILMN_2160476 | CCL22     | 1.36E-03 | -0.83 |
| ILMN_1751975 | ALOX15B   | 1.36E-03 | -0.41 |
| ILMN_1743620 | RARRES1   | 1.36E-03 | 0.68  |
| ILMN_1723260 | ETV5      | 1.36E-03 | 0.53  |
| ILMN_2094942 | 42064     | 1.36E-03 | 0.63  |
| ILMN_1784602 | CDKN1A    | 1.36E-03 | 0.47  |
| ILMN_2358540 | RBMS1     | 1.36E-03 | 0.83  |
| ILMN_1810420 | DYSF      | 1.40E-03 | 0.48  |
| ILMN_1712545 | S100A3    | 1.40E-03 | 0.27  |
| ILMN_1739222 | ETV5      | 1.42E-03 | 0.74  |
| ILMN_1705769 | IL7       | 1.42E-03 | 0.47  |
| ILMN_1760247 | CD70      | 1.46E-03 | -0.70 |
| ILMN_1790014 | METRNL    | 1.46E-03 | 0.52  |
| ILMN_1770911 | NRSN2     | 1.46E-03 | 0.30  |
| ILMN_1715131 | CCR7      | 1.46E-03 | -0.87 |
| ILMN_1686573 | DEFB1     | 1.46E-03 | -0.45 |
| ILMN_1656310 | INDO      | 1.46E-03 | -0.79 |
| ILMN_2231928 | MX2       | 1.48E-03 | -0.54 |
| ILMN_1689160 | DPEP2     | 1.50E-03 | -0.53 |
| ILMN_2405324 | IL28RA    | 1.52E-03 | -0.67 |
| ILMN_1809467 | VAMP5     | 1.55E-03 | 0.52  |
| ILMN_1749006 | RCSD1     | 1.60E-03 | -0.50 |
| ILMN_3187324 | CNRIP1    | 1.61E-03 | 0.31  |
| ILMN_2328666 | CD83      | 1.62E-03 | -0.57 |
| ILMN_1788017 | HSH2D     | 1.64E-03 | -0.24 |
| ILMN_2146761 | FABP5     | 1.72E-03 | 0.57  |
| ILMN_3251341 | TUBA1C    | 1.72E-03 | 0.59  |
| ILMN_1733288 | C1RL      | 1.72E-03 | 0.46  |
| ILMN_1735764 | HTR2B     | 1.76E-03 | -0.60 |
| ILMN_3194508 | ASAP2     | 1.82E-03 | 0.41  |
| ILMN_2367753 | ATP2B4    | 1.87E-03 | 0.57  |
| ILMN_1699854 | GRIN3B    | 1.88E-03 | 0.23  |
| ILMN_1674046 | C10orf128 | 1.90E-03 | -0.39 |
| ILMN_2352934 | ASPH      | 1.91E-03 | 0.37  |
| ILMN_3236428 | TMEM170B  | 1.95E-03 | -0.45 |

|              |           |          |       |
|--------------|-----------|----------|-------|
| ILMN_2313730 | RHOC      | 1.95E-03 | 0.54  |
| ILMN_1687533 | SEMA4D    | 1.96E-03 | -0.47 |
| ILMN_1811624 | THADA     | 1.97E-03 | -0.41 |
| ILMN_1783621 | CMPK2     | 2.01E-03 | -0.40 |
| ILMN_1716105 | NLRP12    | 2.03E-03 | 0.54  |
| ILMN_1835092 |           | 2.04E-03 | -0.42 |
| ILMN_2110908 | MYC       | 2.05E-03 | 0.43  |
| ILMN_1788416 | FAM108C1  | 2.05E-03 | 0.72  |
| ILMN_1794803 | NDP       | 2.05E-03 | 0.89  |
| ILMN_2296036 | PTPN2     | 2.05E-03 | 0.53  |
| ILMN_2393149 | ALOX15B   | 2.05E-03 | -0.46 |
| ILMN_1663119 | DSC2      | 2.05E-03 | 0.47  |
| ILMN_1765701 | LOC399942 | 2.05E-03 | 0.74  |
| ILMN_2144088 | FDFT1     | 2.07E-03 | -0.58 |
| ILMN_1775380 | SMOX      | 2.09E-03 | 0.75  |
| ILMN_1764769 | VWA5A     | 2.09E-03 | 0.56  |
| ILMN_1686454 | TIFA      | 2.09E-03 | 0.39  |
| ILMN_1764723 | SH3PXD2B  | 2.09E-03 | 0.56  |
| ILMN_1802708 | BTN3A1    | 2.10E-03 | -0.44 |
| ILMN_1756992 | MUC1      | 2.11E-03 | 0.81  |
| ILMN_2382500 | MS4A14    | 2.13E-03 | -0.32 |
| ILMN_2067852 | SLC30A1   | 2.17E-03 | 0.50  |
| ILMN_1733811 | JUP       | 2.24E-03 | -0.50 |
| ILMN_1771599 | PLOD2     | 2.24E-03 | 0.44  |
| ILMN_1784749 | GAS6      | 2.25E-03 | 0.52  |
| ILMN_2246882 | SP140     | 2.25E-03 | -0.38 |
| ILMN_2338452 | SERPINA1  | 2.25E-03 | 0.75  |
| ILMN_1715068 | AQP9      | 2.27E-03 | 0.45  |
| ILMN_2337336 | PVRL2     | 2.28E-03 | 0.39  |
| ILMN_1800261 | TUBA1B    | 2.28E-03 | 0.53  |
| ILMN_1797875 | ALOX5AP   | 2.32E-03 | -0.94 |
| ILMN_1679797 | ADARB1    | 2.35E-03 | 0.60  |
| ILMN_1652680 | LOC652616 | 2.36E-03 | -0.68 |
| ILMN_1779558 | GAS6      | 2.36E-03 | 0.60  |
| ILMN_1762861 | HLA-F     | 2.40E-03 | -0.66 |
| ILMN_1672589 | SEMA4B    | 2.41E-03 | 0.50  |
| ILMN_1759097 | MLLT11    | 2.41E-03 | 0.43  |
| ILMN_2233539 | SLC39A8   | 2.42E-03 | 0.95  |
| ILMN_1780861 | LOC653506 | 2.42E-03 | 0.71  |
| ILMN_1674063 | OAS2      | 2.42E-03 | -0.78 |
| ILMN_1804277 | SPRED1    | 2.44E-03 | 0.62  |
| ILMN_1743933 | TSHZ3     | 2.45E-03 | 0.55  |
| ILMN_1682781 | TEAD2     | 2.47E-03 | 0.51  |
| ILMN_2331231 | TNFRSF6B  | 2.54E-03 | 0.15  |
| ILMN_1741171 | TM2D2     | 2.55E-03 | 0.58  |
| ILMN_1692742 | DENND3    | 2.57E-03 | 0.31  |

|              |           |          |       |
|--------------|-----------|----------|-------|
| ILMN_1758963 | NADK      | 2.57E-03 | -0.45 |
| ILMN_1771688 | RAB7B     | 2.57E-03 | -0.74 |
| ILMN_1674789 | LOC651738 | 2.60E-03 | 0.40  |
| ILMN_1691341 | IL7R      | 2.60E-03 | 0.75  |
| ILMN_2087656 | SLCO2B1   | 2.62E-03 | 0.57  |
| ILMN_2404154 | SERPINA1  | 2.62E-03 | 0.75  |
| ILMN_2296037 | PTPN2     | 2.62E-03 | 0.20  |
| ILMN_1781045 | FXVD2     | 2.62E-03 | -0.35 |
| ILMN_1800540 | CD55      | 2.66E-03 | 0.54  |
| ILMN_2342579 | IL7R      | 2.72E-03 | 0.68  |
| ILMN_1654612 | ZNF589    | 2.72E-03 | -0.40 |
| ILMN_2404625 | LAT       | 2.73E-03 | -0.50 |
| ILMN_2216815 | MAP7      | 2.76E-03 | 0.32  |
| ILMN_1765994 | ZBP1      | 2.77E-03 | -0.34 |
| ILMN_1716276 | CCL4L2    | 2.77E-03 | 0.49  |
| ILMN_1740466 | FAM46A    | 2.79E-03 | -0.70 |
| ILMN_1726624 | YPEL4     | 2.79E-03 | -0.44 |
| ILMN_2215640 | TUBA3D    | 2.79E-03 | 0.44  |
| ILMN_1748915 | S100A12   | 2.79E-03 | 0.43  |
| ILMN_1668063 | FCN1      | 2.82E-03 | -0.69 |
| ILMN_1802780 | M160      | 2.82E-03 | 0.50  |
| ILMN_1767349 | ABCB4     | 2.90E-03 | 0.30  |
| ILMN_2214678 | MXD1      | 2.95E-03 | 0.54  |
| ILMN_2169261 | TNNI2     | 2.97E-03 | -0.41 |
| ILMN_1680579 | ATP2B4    | 2.97E-03 | 0.45  |
| ILMN_3248773 | C7orf40   | 2.97E-03 | 0.43  |
| ILMN_2401878 | DUSP10    | 2.99E-03 | -0.47 |
| ILMN_1728742 | C5orf4    | 3.01E-03 | -0.40 |
| ILMN_2078599 | ACP5      | 3.03E-03 | -0.94 |
| ILMN_2329914 | SPRY1     | 3.09E-03 | 0.78  |
| ILMN_2331121 | FCGR2C    | 3.10E-03 | 0.15  |
| ILMN_1652464 | TUBA3E    | 3.18E-03 | 0.15  |
| ILMN_1694539 | MAP3K6    | 3.19E-03 | 0.44  |
| ILMN_2232157 | SLMO1     | 3.21E-03 | 0.35  |
| ILMN_1800898 | ARG2      | 3.21E-03 | 0.43  |
| ILMN_1694177 | PCNA      | 3.21E-03 | -0.57 |
| ILMN_1691731 | PARP14    | 3.21E-03 | -0.51 |
| ILMN_1697817 | PANX1     | 3.30E-03 | 0.37  |
| ILMN_1800091 | RARRES1   | 3.31E-03 | 0.66  |
| ILMN_3249748 | LDHA      | 3.33E-03 | 0.51  |
| ILMN_2410038 | FAM111A   | 3.42E-03 | -0.51 |
| ILMN_3227023 | SNHG7     | 3.43E-03 | -0.42 |
| ILMN_1680618 | MYC       | 3.43E-03 | 0.67  |
| ILMN_1685005 | TNFRSF1A  | 3.43E-03 | 0.60  |
| ILMN_1768577 | PCSK6     | 3.43E-03 | 0.33  |
| ILMN_1711223 | LOC649362 | 3.43E-03 | 0.60  |

|              |           |          |       |
|--------------|-----------|----------|-------|
| ILMN_2415421 | SLC30A2   | 3.46E-03 | 0.17  |
| ILMN_1658247 | OAS1      | 3.46E-03 | -0.63 |
| ILMN_1707591 | TNIP3     | 3.63E-03 | 0.33  |
| ILMN_2388112 | CR1       | 3.64E-03 | 0.33  |
| ILMN_1723004 | CD72      | 3.64E-03 | 0.44  |
| ILMN_1731048 | TLR1      | 3.69E-03 | 0.45  |
| ILMN_1666932 | FCGR2A    | 3.69E-03 | 0.68  |
| ILMN_2398926 | C17orf58  | 3.76E-03 | 0.51  |
| ILMN_2367258 | SMOX      | 3.76E-03 | 0.60  |
| ILMN_2186137 | RRAD      | 3.76E-03 | 0.23  |
| ILMN_1654639 | HERC6     | 3.78E-03 | -0.41 |
| ILMN_1801767 | ABHD3     | 3.79E-03 | 0.58  |
| ILMN_1706523 | FCGR2A    | 3.83E-03 | 0.43  |
| ILMN_1667711 | HRASLS3   | 3.85E-03 | -0.36 |
| ILMN_1812278 | LY9       | 3.85E-03 | -0.45 |
| ILMN_1714383 | TPD52L1   | 3.85E-03 | 0.32  |
| ILMN_3223317 | LOC728666 | 3.85E-03 | 0.36  |
| ILMN_1663618 | STAT3     | 3.85E-03 | 0.52  |
| ILMN_1811616 | EEPD1     | 3.85E-03 | -0.30 |
| ILMN_1704972 | TRIM5     | 3.85E-03 | -0.46 |
| ILMN_1738116 | TMEM119   | 3.90E-03 | -0.57 |
| ILMN_2124221 | CLLU1OS   | 4.01E-03 | -0.55 |
| ILMN_2085012 | TMEM176B  | 4.01E-03 | 0.37  |
| ILMN_1742167 | TUBA1C    | 4.05E-03 | 0.82  |
| ILMN_2188722 | GLS       | 4.35E-03 | 0.53  |
| ILMN_1662896 | BRWD2     | 4.52E-03 | 0.43  |
| ILMN_1781626 | C1S       | 4.52E-03 | 0.48  |
| ILMN_1653498 | IGSF6     | 4.75E-03 | -0.71 |
| ILMN_1898124 |           | 4.75E-03 | 0.39  |
| ILMN_1699331 | IFIT1     | 4.79E-03 | -0.26 |
| ILMN_2132599 | ANKRD22   | 4.81E-03 | 0.39  |
| ILMN_1664176 | FBLN5     | 4.91E-03 | 0.31  |
| ILMN_3240187 | TMEM111   | 4.91E-03 | -0.48 |
| ILMN_2186061 | PFKFB3    | 4.92E-03 | 0.62  |
| ILMN_2367239 | RCAN1     | 4.99E-03 | 0.83  |
| ILMN_1710962 | TMEM97    | 5.11E-03 | -0.34 |
| ILMN_3235853 | S1PR1     | 5.21E-03 | 0.39  |
| ILMN_1712719 | MAP7      | 5.28E-03 | 0.40  |
| ILMN_3232894 | CNRIP1    | 5.33E-03 | 0.45  |
| ILMN_1763386 | BID       | 5.37E-03 | -0.44 |
| ILMN_1673676 | SNX5      | 5.40E-03 | 0.39  |
| ILMN_1752965 | GREM1     | 5.43E-03 | 0.58  |
| ILMN_2152257 | SSTR2     | 5.45E-03 | 0.40  |
| ILMN_1784884 | LILRB3    | 5.45E-03 | 0.58  |
| ILMN_1709634 | CMBL      | 5.48E-03 | -0.46 |
| ILMN_2182148 | C2orf32   | 5.50E-03 | 0.39  |

|              |           |          |       |
|--------------|-----------|----------|-------|
| ILMN_1666364 | COQ10A    | 5.52E-03 | -0.31 |
| ILMN_1682675 | TWF1      | 5.54E-03 | 0.25  |
| ILMN_1736806 | PAG1      | 5.56E-03 | 0.51  |
| ILMN_2381257 | DSC2      | 5.62E-03 | 0.30  |
| ILMN_1752199 | LHPP      | 5.66E-03 | -0.53 |
| ILMN_1811148 | BMP2K     | 5.67E-03 | 0.41  |
| ILMN_2094396 | LRRC8C    | 5.68E-03 | 0.33  |
| ILMN_1770085 | BTG2      | 5.73E-03 | 0.48  |
| ILMN_1719543 | MAF       | 5.74E-03 | 0.55  |
| ILMN_1661537 | LEPROT    | 5.80E-03 | 0.52  |
| ILMN_1712112 | RCAN1     | 5.86E-03 | 0.75  |
| ILMN_2345142 | SULF2     | 5.86E-03 | -0.27 |
| ILMN_2128428 | DAB2      | 5.86E-03 | 0.61  |
| ILMN_2048636 | ME2       | 5.86E-03 | 0.68  |
| ILMN_1660544 | ARRDC4    | 5.94E-03 | 0.56  |
| ILMN_1694780 | GCHFR     | 5.96E-03 | -0.65 |
| ILMN_1684629 | C20orf26  | 6.01E-03 | 0.19  |
| ILMN_2204876 | FLVCR2    | 6.01E-03 | 0.70  |
| ILMN_1665877 | RNF149    | 6.06E-03 | 0.42  |
| ILMN_1786823 | ICAM2     | 6.08E-03 | -0.50 |
| ILMN_1731714 | CREB5     | 6.10E-03 | 0.30  |
| ILMN_1718621 | TSPAN32   | 6.16E-03 | -0.69 |
| ILMN_1669550 | MAD2L2    | 6.21E-03 | 0.44  |
| ILMN_1815319 | CMTM4     | 6.26E-03 | 0.39  |
| ILMN_2373831 | BTN3A3    | 6.32E-03 | -0.34 |
| ILMN_1736729 | OAS2      | 6.37E-03 | -0.35 |
| ILMN_3210741 | LOC642956 | 6.52E-03 | 0.54  |
| ILMN_2323944 | FAM110A   | 6.59E-03 | -0.43 |
| ILMN_1668345 | OAF       | 6.66E-03 | -0.41 |
| ILMN_2054019 | ISG15     | 6.70E-03 | -0.71 |
| ILMN_1718977 | GADD45B   | 6.77E-03 | 0.28  |
| ILMN_1683250 | LOC440731 | 6.78E-03 | 0.25  |
| ILMN_1736939 | UGCG      | 6.78E-03 | 0.51  |
| ILMN_1910120 | LOC730092 | 6.92E-03 | -0.38 |
| ILMN_1721106 | C14orf159 | 6.94E-03 | -0.39 |
| ILMN_1671337 | SLC2A5    | 6.94E-03 | 0.46  |
| ILMN_2172091 | TDO2      | 6.96E-03 | 0.32  |
| ILMN_1799106 | MOSC1     | 6.96E-03 | -0.40 |
| ILMN_1782015 | FCRLB     | 7.01E-03 | 0.39  |
| ILMN_2388547 | EPSTI1    | 7.09E-03 | -0.52 |
| ILMN_1768553 | LOC283050 | 7.20E-03 | -0.46 |
| ILMN_3215715 | LOC389386 | 7.20E-03 | 0.45  |
| ILMN_2114568 | GBP5      | 7.25E-03 | -0.49 |
| ILMN_1702534 | CD244     | 7.25E-03 | -0.16 |
| ILMN_1736863 | TMEM140   | 7.25E-03 | -0.50 |
| ILMN_1708537 | RBPJ      | 7.35E-03 | 0.50  |



|              |              |          |       |
|--------------|--------------|----------|-------|
| ILMN_2284744 | HNMT         | 7.44E-03 | 0.38  |
| ILMN_1782305 | NR4A2        | 7.55E-03 | -0.33 |
| ILMN_1654560 | TLR6         | 7.56E-03 | 0.42  |
| ILMN_1768020 | HAUS8        | 7.59E-03 | -0.20 |
| ILMN_1735014 | KLF6         | 7.59E-03 | 0.49  |
| ILMN_2320964 | ADAR         | 7.59E-03 | -0.45 |
| ILMN_1786429 | P2RY5        | 7.59E-03 | -0.40 |
| ILMN_2389810 | ATP11C       | 7.60E-03 | 0.39  |
| ILMN_1792497 | HRB          | 7.61E-03 | 0.31  |
| ILMN_3209232 | LOC644496    | 7.65E-03 | 0.48  |
| ILMN_1690921 | STAT2        | 7.70E-03 | -0.59 |
| ILMN_1819494 |              | 7.70E-03 | 0.22  |
| ILMN_3244457 | EHBP1L1      | 7.72E-03 | 0.48  |
| ILMN_1797950 | EXTL2        | 7.72E-03 | -0.31 |
| ILMN_1752755 | VWF          | 7.75E-03 | -0.49 |
| ILMN_1739942 | FAM117B      | 7.76E-03 | -0.30 |
| ILMN_1671791 | PCK2         | 7.76E-03 | 0.71  |
| ILMN_1709772 | SNX5         | 7.86E-03 | 0.48  |
| ILMN_1726189 | MS4A14       | 7.87E-03 | -0.47 |
| ILMN_1796074 | C18orf56     | 7.98E-03 | -0.19 |
| ILMN_1677441 | C20orf123    | 8.02E-03 | 0.47  |
| ILMN_3235832 | LOC728835    | 8.12E-03 | 0.35  |
| ILMN_1808919 | HPS4         | 8.13E-03 | -0.31 |
| ILMN_1652357 | PDHX         | 8.13E-03 | 0.56  |
| ILMN_1723486 | HK2          | 8.13E-03 | -0.48 |
| ILMN_1656837 | RBP1         | 8.13E-03 | -0.47 |
| ILMN_1750409 | RAB9A        | 8.13E-03 | -0.52 |
| ILMN_3243366 | C2orf55      | 8.17E-03 | 0.30  |
| ILMN_2336280 | QKI          | 8.18E-03 | 0.35  |
| ILMN_1827736 |              | 8.18E-03 | -0.37 |
| ILMN_1680344 | MYOM1        | 8.19E-03 | -0.26 |
| ILMN_2256050 | SERPINA1     | 8.19E-03 | 0.19  |
| ILMN_3256478 | LOC100129034 | 8.26E-03 | 0.49  |
| ILMN_1726720 | NUSAP1       | 8.31E-03 | -0.33 |
| ILMN_2223941 | FBLN5        | 8.45E-03 | 0.41  |
| ILMN_1813704 | KIAA1199     | 8.52E-03 | 1.39  |
| ILMN_1659913 | ISG20        | 8.68E-03 | -0.64 |
| ILMN_1661755 | FAM129B      | 8.96E-03 | 0.65  |
| ILMN_1704369 | LIMA1        | 9.12E-03 | 0.50  |
| ILMN_2398572 | FXVD2        | 9.16E-03 | -0.43 |
| ILMN_1803256 | STOX2        | 9.22E-03 | -0.40 |
| ILMN_1784630 | KBTBD11      | 9.22E-03 | 0.23  |
| ILMN_2128293 | APIP         | 9.29E-03 | 0.55  |
| ILMN_1688580 | CAMP         | 9.32E-03 | -0.70 |
| ILMN_1702447 | IGF2BP2      | 9.32E-03 | 0.34  |
| ILMN_1676528 | BTN3A2       | 9.36E-03 | -0.41 |

|              |          |          |       |
|--------------|----------|----------|-------|
| ILMN_1741957 | RABEPK   | 9.36E-03 | 0.51  |
| ILMN_2248970 | OAS2     | 9.36E-03 | -0.29 |
| ILMN_1784985 | PRRT3    | 9.36E-03 | -0.26 |
| ILMN_2402600 | GLIS3    | 9.36E-03 | 0.21  |
| ILMN_2193980 | ABCB6    | 9.36E-03 | -0.32 |
| ILMN_1784532 | COL22A1  | 9.36E-03 | 0.59  |
| ILMN_1714167 | CYB5A    | 9.36E-03 | -0.61 |
| ILMN_1660021 | M6PRBP1  | 9.39E-03 | 0.46  |
| ILMN_2367671 | LIMK2    | 9.43E-03 | 0.19  |
| ILMN_1675483 | ANKMY1   | 9.45E-03 | -0.29 |
| ILMN_2262044 | PARP10   | 9.46E-03 | -0.54 |
| ILMN_1726222 | FLOT2    | 9.49E-03 | 0.43  |
| ILMN_1755658 | ABI3     | 9.56E-03 | -0.37 |
| ILMN_1807106 | LDHA     | 9.66E-03 | 0.75  |
| ILMN_1761199 | SLCO2B1  | 9.66E-03 | 0.55  |
| ILMN_1782788 | CSDA     | 9.66E-03 | 0.53  |
| ILMN_1802615 | CDK6     | 9.66E-03 | 0.38  |
| ILMN_1807529 | PADI4    | 9.66E-03 | -0.18 |
| ILMN_1726245 | TGFBR2   | 9.76E-03 | 0.43  |
| ILMN_1715024 | LSS      | 9.82E-03 | -0.36 |
| ILMN_1798249 | AK3L1    | 9.82E-03 | 0.25  |
| ILMN_1707748 | PIM3     | 9.82E-03 | 0.41  |
| ILMN_1680805 | IL28RA   | 9.82E-03 | -0.32 |
| ILMN_1675656 | PPFIBP2  | 9.82E-03 | -0.57 |
| ILMN_2352121 | NT5C3    | 9.87E-03 | -0.63 |
| ILMN_1727606 | C12orf59 | 9.87E-03 | 0.28  |
| ILMN_1695590 | ADRB2    | 9.87E-03 | 0.63  |
| ILMN_3235964 | HSPA7    | 9.90E-03 | 0.32  |
| ILMN_1679093 | ZNF581   | 9.95E-03 | -0.40 |
| ILMN_1692123 | ELOVL3   | 9.95E-03 | -0.16 |
| ILMN_2048507 | KLF3     | 9.95E-03 | 0.18  |
| ILMN_2365465 | XBP1     | 9.95E-03 | 0.81  |
| ILMN_2227248 | SLAMF9   | 9.96E-03 | -0.77 |
| ILMN_1843198 |          | 9.96E-03 | 0.57  |

#### IL4

| ProbeID      | Gene Symbol | FDR      | Log <sub>2</sub> [IL4/NoTx] |
|--------------|-------------|----------|-----------------------------|
| ILMN_1721901 | CTNNAL1     | 2.10E-11 | 3.26                        |
| ILMN_2136446 | CTNNAL1     | 2.10E-11 | 2.95                        |
| ILMN_1756701 | DHRS11      | 2.10E-11 | 2.79                        |
| ILMN_1784756 | ACOT7       | 1.10E-10 | 1.92                        |
| ILMN_1676372 | CD209       | 1.10E-10 | 2.76                        |
| ILMN_1792885 | CTSC        | 1.26E-10 | 2.26                        |
| ILMN_2404688 | NUPR1       | 1.57E-10 | -1.78                       |

|              |           |          |       |
|--------------|-----------|----------|-------|
| ILMN_1783593 | CCL13     | 2.17E-10 | 4.41  |
| ILMN_2160476 | CCL22     | 3.37E-10 | 2.48  |
| ILMN_1810560 | P8        | 4.34E-10 | -1.64 |
| ILMN_1678939 | VNN2      | 4.34E-10 | -2.09 |
| ILMN_3247139 | C17orf96  | 4.34E-10 | 1.81  |
| ILMN_1679267 | TGM2      | 4.34E-10 | 1.43  |
| ILMN_1682312 | CYBB      | 4.34E-10 | -1.99 |
| ILMN_1705750 | TGM2      | 4.34E-10 | 2.76  |
| ILMN_1724708 | RAB33A    | 4.34E-10 | 2.29  |
| ILMN_3245659 | ERI1      | 4.34E-10 | 1.79  |
| ILMN_1665455 | DCUN1D3   | 4.35E-10 | 1.82  |
| ILMN_1758864 | VNN2      | 4.35E-10 | -1.90 |
| ILMN_2332250 | ACOT7     | 4.35E-10 | 2.01  |
| ILMN_1729801 | S100A8    | 4.39E-10 | -2.27 |
| ILMN_1763207 | BATF3     | 1.35E-09 | 1.41  |
| ILMN_1738207 | CISH      | 1.61E-09 | 1.27  |
| ILMN_1681601 | SUCNR1    | 1.89E-09 | 1.75  |
| ILMN_1676563 | HTRA1     | 2.68E-09 | -1.43 |
| ILMN_1738116 | TMEM119   | 2.98E-09 | -1.37 |
| ILMN_1784749 | GAS6      | 2.98E-09 | 1.28  |
| ILMN_1912287 |           | 3.03E-09 | 1.68  |
| ILMN_1764030 | CCL23     | 3.25E-09 | 2.07  |
| ILMN_3244114 | DHRS11    | 3.43E-09 | 2.01  |
| ILMN_3201937 | LOC645381 | 3.43E-09 | 1.65  |
| ILMN_1779558 | GAS6      | 3.56E-09 | 1.36  |
| ILMN_2242463 | CTSC      | 4.07E-09 | 1.44  |
| ILMN_1774733 | SOCS1     | 4.12E-09 | 1.76  |
| ILMN_1761968 | PPP1R14A  | 4.12E-09 | 2.25  |
| ILMN_2092118 | FPR1      | 4.20E-09 | -1.54 |
| ILMN_1785345 | GPR84     | 4.20E-09 | -1.22 |
| ILMN_1671486 | HOMER2    | 4.29E-09 | 2.29  |
| ILMN_1800739 | SPINT2    | 4.29E-09 | 2.43  |
| ILMN_1686109 | CCL23     | 4.29E-09 | 1.87  |
| ILMN_3307757 | C17orf87  | 4.36E-09 | 1.85  |
| ILMN_1682761 | C17orf87  | 4.36E-09 | 1.93  |
| ILMN_1740015 | CD14      | 4.37E-09 | -1.79 |
| ILMN_1757186 | GIMAP1    | 5.32E-09 | -1.34 |
| ILMN_1690342 | LTA4H     | 6.54E-09 | -1.35 |
| ILMN_1671969 | UGP2      | 6.54E-09 | 1.26  |
| ILMN_1759023 | WFS1      | 6.60E-09 | 1.63  |
| ILMN_1712985 | C17orf58  | 7.12E-09 | 2.40  |
| ILMN_1689734 | IL1RN     | 7.26E-09 | 2.19  |
| ILMN_1809639 | TMEM26    | 7.54E-09 | 1.16  |
| ILMN_1710186 | CCL17     | 8.21E-09 | 3.79  |
| ILMN_1666049 | NUP214    | 1.02E-08 | -1.20 |
| ILMN_2186061 | PFKFB3    | 1.20E-08 | -1.49 |

|              |           |          |       |
|--------------|-----------|----------|-------|
| ILMN_1696347 | CTSC      | 1.20E-08 | 1.35  |
| ILMN_1911721 |           | 1.22E-08 | 1.46  |
| ILMN_1760180 | MID2      | 1.22E-08 | 1.01  |
| ILMN_1797236 | TGM2      | 1.26E-08 | 1.13  |
| ILMN_2359945 | CES1      | 1.35E-08 | -1.12 |
| ILMN_1654210 | CD1C      | 1.46E-08 | 0.86  |
| ILMN_2403237 | CHN2      | 1.48E-08 | 1.18  |
| ILMN_1774874 | IL1RN     | 1.51E-08 | 2.12  |
| ILMN_2348487 | EMR3      | 2.31E-08 | -1.19 |
| ILMN_1751572 | TLE1      | 2.34E-08 | 1.27  |
| ILMN_1698732 | PALLD     | 2.34E-08 | 2.44  |
| ILMN_2391051 | FCGR1B    | 2.44E-08 | -1.04 |
| ILMN_2339835 | PTGS1     | 2.48E-08 | 1.18  |
| ILMN_1701173 | KCNK6     | 2.49E-08 | 1.14  |
| ILMN_1750974 | S100A9    | 2.57E-08 | -1.26 |
| ILMN_1695246 | KLHDC8B   | 2.71E-08 | -1.05 |
| ILMN_1694780 | GCHFR     | 3.71E-08 | -1.07 |
| ILMN_2205963 | C10orf54  | 4.02E-08 | -1.19 |
| ILMN_2415303 | CLEC10A   | 4.02E-08 | 2.54  |
| ILMN_1663640 | MAOA      | 4.25E-08 | 2.49  |
| ILMN_1747744 | LHFPL2    | 4.28E-08 | -1.09 |
| ILMN_2335754 | CD1E      | 4.40E-08 | 1.12  |
| ILMN_1709204 | CLEC4A    | 4.82E-08 | 1.49  |
| ILMN_1713124 | AKR1C3    | 5.00E-08 | -1.39 |
| ILMN_2054297 | PTGS2     | 5.06E-08 | -0.83 |
| ILMN_1790689 | CRISPLD2  | 5.06E-08 | -1.41 |
| ILMN_1763638 | BCAR3     | 5.10E-08 | 0.89  |
| ILMN_1913678 |           | 5.10E-08 | -0.98 |
| ILMN_1709348 | ALDH1A1   | 5.59E-08 | -1.40 |
| ILMN_1702447 | IGF2BP2   | 5.79E-08 | 0.95  |
| ILMN_2042595 | PCM1      | 6.42E-08 | 0.98  |
| ILMN_1757072 | LOC642489 | 6.94E-08 | 1.17  |
| ILMN_2202915 | FAR2      | 7.00E-08 | 1.74  |
| ILMN_1810628 | KIAA0367  | 7.04E-08 | -0.98 |
| ILMN_2101278 | RGS18     | 7.06E-08 | -1.06 |
| ILMN_1784602 | CDKN1A    | 7.08E-08 | 1.01  |
| ILMN_1690487 | PCM1      | 7.16E-08 | 1.00  |
| ILMN_1731292 | CA5A      | 7.24E-08 | 0.82  |
| ILMN_1712532 | CARD9     | 7.24E-08 | 1.23  |
| ILMN_2382648 | MID2      | 7.41E-08 | 1.07  |
| ILMN_1733535 | ZNF366    | 7.41E-08 | 1.09  |
| ILMN_1735764 | HTR2B     | 7.69E-08 | -1.23 |
| ILMN_2367239 | RCAN1     | 8.06E-08 | 1.23  |
| ILMN_1689836 | C5AR1     | 8.15E-08 | -1.19 |
| ILMN_1667050 | PRPS1     | 8.49E-08 | 1.36  |
| ILMN_1811114 | SDS       | 9.56E-08 | -1.20 |

|              |          |          |       |
|--------------|----------|----------|-------|
| ILMN_1785252 | SLC26A6  | 9.64E-08 | 1.04  |
| ILMN_1678961 | FRMD4A   | 9.65E-08 | 1.08  |
| ILMN_1713679 | MREG     | 9.85E-08 | 0.91  |
| ILMN_1679217 | FAM110B  | 9.87E-08 | 0.74  |
| ILMN_1657435 | MT1M     | 1.04E-07 | -1.20 |
| ILMN_1780465 | CLEC5A   | 1.05E-07 | -1.25 |
| ILMN_2261600 | FCGR1B   | 1.05E-07 | -1.28 |
| ILMN_2176063 | FCGR1A   | 1.05E-07 | -1.23 |
| ILMN_2326509 | CASP1    | 1.05E-07 | -1.02 |
| ILMN_1704369 | LIMA1    | 1.05E-07 | 1.16  |
| ILMN_2112988 | NCF1C    | 1.05E-07 | -1.20 |
| ILMN_2401878 | DUSP10   | 1.05E-07 | -1.00 |
| ILMN_1747305 | GIMAP8   | 1.07E-07 | -1.52 |
| ILMN_1758315 | SLC9A9   | 1.07E-07 | -0.92 |
| ILMN_2216918 | SHPK     | 1.08E-07 | 1.01  |
| ILMN_1731745 | NINJ2    | 1.12E-07 | -1.12 |
| ILMN_1712112 | RCAN1    | 1.18E-07 | 1.27  |
| ILMN_1764754 | RAMP1    | 1.18E-07 | 1.50  |
| ILMN_1705047 | TLR8     | 1.19E-07 | -0.95 |
| ILMN_1778240 | GFOD1    | 1.21E-07 | 0.85  |
| ILMN_1740265 | ACOT7    | 1.21E-07 | 2.07  |
| ILMN_1664828 | APOBEC3H | 1.29E-07 | -0.85 |
| ILMN_2364384 | PPARG    | 1.30E-07 | 1.03  |
| ILMN_1793859 | ALDH2    | 1.33E-07 | -1.01 |
| ILMN_2136089 | MTE      | 1.33E-07 | -1.17 |
| ILMN_1699071 | C21orf7  | 1.36E-07 | -1.40 |
| ILMN_1671509 | CCL3     | 1.40E-07 | 1.24  |
| ILMN_1805737 | PFKP     | 1.44E-07 | 1.38  |
| ILMN_1700515 | C17orf58 | 1.51E-07 | 2.42  |
| ILMN_2129505 | CYBASC3  | 1.51E-07 | -1.03 |
| ILMN_1659601 | CCL26    | 1.54E-07 | 2.66  |
| ILMN_2184373 | IL8      | 1.56E-07 | -1.30 |
| ILMN_1654411 | CCL18    | 1.64E-07 | 1.76  |
| ILMN_2398926 | C17orf58 | 1.64E-07 | 2.32  |
| ILMN_2148668 | RCBTB2   | 1.71E-07 | -0.87 |
| ILMN_1676042 | ALOX15   | 1.75E-07 | 1.39  |
| ILMN_1699489 | TUBB6    | 1.79E-07 | 0.96  |
| ILMN_1693009 | FGL2     | 1.79E-07 | 1.48  |
| ILMN_2326512 | CASP1    | 1.80E-07 | -1.05 |
| ILMN_1657892 | TLR8     | 1.84E-07 | -1.20 |
| ILMN_1751034 | ITPRIPL2 | 1.84E-07 | 1.10  |
| ILMN_1671116 | C3orf21  | 1.93E-07 | 1.04  |
| ILMN_1796349 | SMPDL3A  | 1.93E-07 | -1.00 |
| ILMN_1729749 | HERC5    | 1.93E-07 | -1.03 |
| ILMN_1782015 | FCRLB    | 1.99E-07 | 1.01  |
| ILMN_1666733 | IL8      | 2.00E-07 | -1.67 |

|              |           |          |       |
|--------------|-----------|----------|-------|
| ILMN_1742332 | KCTD12    | 2.11E-07 | -1.09 |
| ILMN_2346479 | HOMER2    | 2.11E-07 | 1.37  |
| ILMN_2105573 | CCL3L3    | 2.15E-07 | 1.14  |
| ILMN_3236428 | TMEM170B  | 2.17E-07 | -0.73 |
| ILMN_1661755 | FAM129B   | 2.30E-07 | 1.05  |
| ILMN_1730628 | RNASE2    | 2.30E-07 | -0.87 |
| ILMN_1781386 | WIPI1     | 2.31E-07 | -0.87 |
| ILMN_1741957 | RABEPK    | 2.36E-07 | 1.01  |
| ILMN_3240222 | PRAGMIN   | 2.38E-07 | 1.00  |
| ILMN_1770768 | SLAMF1    | 2.44E-07 | 0.75  |
| ILMN_1730454 | FOLR3     | 2.44E-07 | -0.89 |
| ILMN_2352380 | TRPM2     | 2.45E-07 | -0.70 |
| ILMN_2333367 | FKBP1A    | 2.51E-07 | 1.19  |
| ILMN_1669831 | C6orf192  | 2.51E-07 | -1.01 |
| ILMN_1676159 | MST4      | 2.52E-07 | 0.83  |
| ILMN_2291954 | SLA       | 2.60E-07 | 0.84  |
| ILMN_1685170 | ANXA11    | 2.61E-07 | 0.93  |
| ILMN_2143795 | MGC4677   | 2.63E-07 | 1.24  |
| ILMN_1774110 | CHN2      | 2.74E-07 | 0.86  |
| ILMN_1697309 | NCF1      | 2.84E-07 | -1.25 |
| ILMN_1720270 | CDR2      | 2.92E-07 | 1.03  |
| ILMN_1701914 | CD274     | 2.93E-07 | 0.63  |
| ILMN_3283573 | LOC647276 | 2.95E-07 | 0.95  |
| ILMN_1677396 | NDFIP2    | 2.95E-07 | 1.07  |
| ILMN_1769290 | TTC39B    | 2.95E-07 | 0.93  |
| ILMN_2096372 | ALDH1A1   | 3.08E-07 | -1.14 |
| ILMN_1815190 | METTL1    | 3.08E-07 | 0.99  |
| ILMN_1776678 | GIMAP7    | 3.13E-07 | -1.05 |
| ILMN_1748473 | GIMAP4    | 3.18E-07 | -1.09 |
| ILMN_2162972 | LYZ       | 3.31E-07 | -1.47 |
| ILMN_2232121 | GPR65     | 3.38E-07 | -0.76 |
| ILMN_1781983 | AP1B1     | 3.40E-07 | 0.93  |
| ILMN_1667966 | C1orf24   | 3.40E-07 | 0.87  |
| ILMN_1683658 | FKBP1A    | 3.43E-07 | 1.08  |
| ILMN_1709634 | CMBL      | 3.56E-07 | -1.01 |
| ILMN_2193817 | CLEC4G    | 3.60E-07 | 0.80  |
| ILMN_1856480 |           | 3.73E-07 | 0.94  |
| ILMN_1679460 | PPFIBP1   | 3.73E-07 | 0.68  |
| ILMN_1740418 | CYP27B1   | 3.73E-07 | 1.18  |
| ILMN_1716276 | CCL4L2    | 3.89E-07 | 1.33  |
| ILMN_2371280 | CSF3R     | 3.95E-07 | -0.98 |
| ILMN_2399363 | CLEC4A    | 3.96E-07 | 1.61  |
| ILMN_1775170 | MT1X      | 3.98E-07 | -1.04 |
| ILMN_1795930 | PTGER4    | 4.09E-07 | -0.90 |
| ILMN_1779706 | TP53BP2   | 4.10E-07 | 0.93  |
| ILMN_1680139 | MAFF      | 4.23E-07 | 1.13  |

|              |           |          |       |
|--------------|-----------|----------|-------|
| ILMN_1776181 | BIRC3     | 4.24E-07 | 1.17  |
| ILMN_1680996 | ALOX5     | 4.24E-07 | -1.62 |
| ILMN_2402798 | AP2M1     | 4.24E-07 | 0.80  |
| ILMN_1665100 | PTGS1     | 4.24E-07 | 0.68  |
| ILMN_1780799 | ENPP2     | 4.24E-07 | 1.11  |
| ILMN_1782938 | SLC16A10  | 4.28E-07 | -0.90 |
| ILMN_3247023 | FLJ22536  | 4.29E-07 | -1.08 |
| ILMN_1700268 | QPRT      | 4.29E-07 | 0.97  |
| ILMN_1704985 | CYP27A1   | 4.29E-07 | -1.01 |
| ILMN_1652237 | CBR3      | 4.29E-07 | 0.95  |
| ILMN_1751561 | CAMK1D    | 4.29E-07 | 0.67  |
| ILMN_1915188 |           | 4.40E-07 | 0.64  |
| ILMN_2218856 | CCL3L1    | 4.43E-07 | 1.11  |
| ILMN_1702237 | FKBP1A    | 4.45E-07 | 0.90  |
| ILMN_1787718 | SLC27A1   | 4.82E-07 | -0.66 |
| ILMN_2306955 | ACPL2     | 4.92E-07 | 0.50  |
| ILMN_1747355 | CCL3L1    | 5.00E-07 | 1.16  |
| ILMN_1688580 | CAMP      | 5.09E-07 | -1.51 |
| ILMN_1656560 | PARM1     | 5.15E-07 | 0.84  |
| ILMN_1805902 | ELA1      | 5.16E-07 | -0.47 |
| ILMN_1689378 | CCRN4L    | 5.24E-07 | 0.80  |
| ILMN_1744138 | CHCHD7    | 5.24E-07 | 0.88  |
| ILMN_1767934 | PCSK5     | 5.24E-07 | 1.01  |
| ILMN_2408796 | C19orf28  | 5.32E-07 | 0.72  |
| ILMN_1701947 | GPR34     | 5.32E-07 | -0.96 |
| ILMN_3207060 | LOC647276 | 5.57E-07 | 0.80  |
| ILMN_1756862 | APOL3     | 5.57E-07 | -0.94 |
| ILMN_1752510 | FAM13A    | 5.63E-07 | -0.71 |
| ILMN_2328666 | CD83      | 5.63E-07 | 0.93  |
| ILMN_1797875 | ALOX5AP   | 5.63E-07 | -2.00 |
| ILMN_1739751 | SLC26A11  | 5.68E-07 | 1.00  |
| ILMN_2052208 | GADD45A   | 5.68E-07 | 1.15  |
| ILMN_1787529 | C3AR1     | 5.68E-07 | -1.04 |
| ILMN_1739428 | IFIT2     | 5.69E-07 | -0.95 |
| ILMN_1661695 | IRAK3     | 5.72E-07 | -0.84 |
| ILMN_1682081 | RNF19B    | 5.72E-07 | 0.90  |
| ILMN_1706598 | ACPL2     | 5.72E-07 | 0.50  |
| ILMN_2389151 | UGP2      | 5.79E-07 | 0.92  |
| ILMN_1800225 | PPARG     | 5.81E-07 | 1.01  |
| ILMN_1732885 | BTBD12    | 5.81E-07 | 0.94  |
| ILMN_1791728 | SLC25A25  | 5.92E-07 | 0.99  |
| ILMN_1740493 | TRAF5     | 5.98E-07 | 0.94  |
| ILMN_2289849 | FCGR2A    | 6.18E-07 | -1.01 |
| ILMN_1670490 | PDPN      | 6.53E-07 | -1.03 |
| ILMN_1746673 | 42250     | 6.55E-07 | 0.81  |
| ILMN_1707312 | NFIL3     | 6.66E-07 | 1.17  |

|              |              |          |       |
|--------------|--------------|----------|-------|
| ILMN_1769383 | GIMAP5       | 6.70E-07 | -0.75 |
| ILMN_1857017 |              | 6.74E-07 | 1.13  |
| ILMN_1786429 | P2RY5        | 6.74E-07 | -0.94 |
| ILMN_1656378 | NMT2         | 6.76E-07 | -0.75 |
| ILMN_2322375 | MAFF         | 6.91E-07 | 0.53  |
| ILMN_1784948 | SPOCD1       | 6.91E-07 | 0.91  |
| ILMN_1746517 | KYNU         | 6.91E-07 | -0.77 |
| ILMN_1808333 | PPP1R7       | 7.02E-07 | 0.88  |
| ILMN_1796245 | DNASE2       | 7.02E-07 | -0.94 |
| ILMN_3247506 | FCGR1C       | 7.14E-07 | -1.04 |
| ILMN_1757552 | PTRF         | 7.14E-07 | 1.07  |
| ILMN_1708934 | ADM          | 7.33E-07 | -0.97 |
| ILMN_1780671 | PLEKHG3      | 7.33E-07 | -0.70 |
| ILMN_1680902 | LOC284998    | 7.38E-07 | 0.52  |
| ILMN_1815168 | HVCN1        | 7.53E-07 | -0.89 |
| ILMN_3272741 | LOC100130520 | 7.63E-07 | 0.65  |
| ILMN_3306997 | METTL1       | 7.73E-07 | 1.09  |
| ILMN_1807719 | CTNS         | 7.75E-07 | 1.33  |
| ILMN_1761961 | CCDC90A      | 7.91E-07 | 0.91  |
| ILMN_2292178 | CLEC12A      | 7.93E-07 | -0.85 |
| ILMN_1796336 | MAP1S        | 8.03E-07 | 1.26  |
| ILMN_1796537 | FYB          | 8.32E-07 | -0.85 |
| ILMN_1763837 | ANPEP        | 8.39E-07 | 0.98  |
| ILMN_1808590 | GUCY1A3      | 8.40E-07 | 0.54  |
| ILMN_1683923 | MT1H         | 8.62E-07 | -1.04 |
| ILMN_2374633 | ZWILCH       | 8.68E-07 | 0.78  |
| ILMN_1712888 | HSPH1        | 8.68E-07 | 0.97  |
| ILMN_1758963 | NADK         | 8.94E-07 | -0.66 |
| ILMN_1685538 | LOC158345    | 9.24E-07 | 1.02  |
| ILMN_1780582 | CD83         | 9.31E-07 | 0.93  |
| ILMN_1804051 | SNX8         | 9.33E-07 | 1.18  |
| ILMN_1712475 | HS3ST2       | 9.33E-07 | 0.64  |
| ILMN_1773006 | FABP4        | 9.33E-07 | 2.09  |
| ILMN_1804277 | SPRED1       | 9.33E-07 | 0.97  |
| ILMN_1690262 | SNAI3        | 9.35E-07 | 0.64  |
| ILMN_1723004 | CD72         | 9.46E-07 | -0.65 |
| ILMN_2290118 | MEGF9        | 9.46E-07 | -0.82 |
| ILMN_1779015 | ZNF467       | 9.62E-07 | -0.79 |
| ILMN_1694268 | HES6         | 9.62E-07 | 0.89  |
| ILMN_1758400 | GRIN3A       | 9.62E-07 | -0.44 |
| ILMN_1726230 | CD1B         | 1.00E-06 | 1.25  |
| ILMN_1720373 | SLC7A5       | 1.01E-06 | 0.81  |
| ILMN_1682636 | CXCL2        | 1.02E-06 | -0.91 |
| ILMN_2049184 | DNASE1L3     | 1.04E-06 | 1.44  |
| ILMN_1657862 | AHCY         | 1.04E-06 | 0.93  |
| ILMN_1668345 | OAF          | 1.06E-06 | -0.68 |



|              |           |          |       |
|--------------|-----------|----------|-------|
| ILMN_1748538 | ALDH1A2   | 1.11E-06 | 1.94  |
| ILMN_1666845 | KRT17     | 1.12E-06 | 0.89  |
| ILMN_2365307 | CD276     | 1.17E-06 | 0.97  |
| ILMN_1656501 | DUSP5     | 1.17E-06 | 1.01  |
| ILMN_1730622 | EVL       | 1.20E-06 | 1.03  |
| ILMN_1740010 | PCNX      | 1.20E-06 | -0.82 |
| ILMN_1693452 | GAL3ST4   | 1.22E-06 | -1.33 |
| ILMN_1801307 | TNFSF10   | 1.22E-06 | -0.80 |
| ILMN_1716053 | AK2       | 1.24E-06 | 0.80  |
| ILMN_1746137 | ST7       | 1.24E-06 | 0.68  |
| ILMN_1677038 | FLJ21986  | 1.26E-06 | -0.80 |
| ILMN_2358540 | RBMS1     | 1.29E-06 | 1.02  |
| ILMN_2199439 | CA2       | 1.30E-06 | 1.31  |
| ILMN_2177090 | LOC200030 | 1.31E-06 | -0.77 |
| ILMN_1802458 | AGTRAP    | 1.32E-06 | -0.71 |
| ILMN_1703946 | ADORA2B   | 1.33E-06 | -0.87 |
| ILMN_1667371 | SLA       | 1.37E-06 | 0.82  |
| ILMN_1680618 | MYC       | 1.37E-06 | 0.95  |
| ILMN_1670542 | AK2       | 1.37E-06 | 0.77  |
| ILMN_1783443 | ALOX15    | 1.41E-06 | 0.72  |
| ILMN_1780861 | LOC653506 | 1.41E-06 | 0.99  |
| ILMN_2284181 | UGP2      | 1.41E-06 | 0.41  |
| ILMN_1772824 | WNT5B     | 1.41E-06 | 0.61  |
| ILMN_1733680 | AZI2      | 1.50E-06 | -0.62 |
| ILMN_1676548 | BZW2      | 1.50E-06 | 0.68  |
| ILMN_1790881 | HNMT      | 1.55E-06 | -0.86 |
| ILMN_1761281 | LOC441019 | 1.56E-06 | -1.04 |
| ILMN_1694075 | GADD45A   | 1.58E-06 | 0.85  |
| ILMN_1783956 | ATP8B4    | 1.59E-06 | -1.01 |
| ILMN_1758672 | FAM107B   | 1.59E-06 | -0.88 |
| ILMN_1758229 | QSOX1     | 1.61E-06 | 0.71  |
| ILMN_1716736 | CD80      | 1.63E-06 | 0.65  |
| ILMN_2380494 | ANXA11    | 1.63E-06 | 0.88  |
| ILMN_1662640 | C20orf127 | 1.65E-06 | -0.97 |
| ILMN_2328776 | MST4      | 1.75E-06 | 0.81  |
| ILMN_1760727 | ANG       | 1.76E-06 | -1.29 |
| ILMN_1800317 | WNT5A     | 1.77E-06 | 0.48  |
| ILMN_1768284 | P2RY8     | 1.78E-06 | -0.92 |
| ILMN_2085441 | FOXD4L1   | 1.81E-06 | 1.40  |
| ILMN_3242586 | RHOA      | 1.81E-06 | -0.88 |
| ILMN_1663142 | CLEC12A   | 1.90E-06 | -0.89 |
| ILMN_1699598 | AP2M1     | 1.90E-06 | 0.77  |
| ILMN_1710221 | GPR35     | 1.92E-06 | 0.92  |
| ILMN_2329429 | GIMAP6    | 1.94E-06 | -0.84 |
| ILMN_1813374 | C19orf28  | 1.94E-06 | 0.84  |
| ILMN_1707124 | TFPI      | 1.94E-06 | -0.69 |

|              |               |          |       |
|--------------|---------------|----------|-------|
| ILMN_2265995 | NBPF3         | 1.94E-06 | -0.59 |
| ILMN_3205162 | LOC646688     | 1.97E-06 | 1.02  |
| ILMN_1737514 | KYNU          | 2.06E-06 | -0.91 |
| ILMN_1673960 | MAT2B         | 2.08E-06 | 0.84  |
| ILMN_2347949 | G6PD          | 2.09E-06 | 0.76  |
| ILMN_1794803 | NDP           | 2.09E-06 | 1.05  |
| ILMN_1742250 | CCNH          | 2.09E-06 | 0.62  |
| ILMN_1779547 | HPSE          | 2.09E-06 | -0.82 |
| ILMN_1694596 | FAR2          | 2.12E-06 | 1.05  |
| ILMN_3307752 | DLEU7         | 2.12E-06 | -0.62 |
| ILMN_1804735 | CBS           | 2.13E-06 | 0.76  |
| ILMN_2283325 | GPR177        | 2.13E-06 | -0.99 |
| ILMN_2411282 | QSOX1         | 2.13E-06 | 0.80  |
| ILMN_1655990 | CDK5RAP2      | 2.13E-06 | -1.00 |
| ILMN_1668039 | GYPC          | 2.13E-06 | -0.75 |
| ILMN_1698313 | CPM           | 2.14E-06 | -0.49 |
| ILMN_1669409 | VSIG4         | 2.23E-06 | -1.05 |
| ILMN_1719986 | PIK3IP1       | 2.26E-06 | -0.71 |
| ILMN_3280847 | LOC651697     | 2.27E-06 | 0.74  |
| ILMN_3282174 | LOC646688     | 2.29E-06 | 0.85  |
| ILMN_1733666 | PLDN          | 2.29E-06 | 0.95  |
| ILMN_1686664 | MT2A          | 2.44E-06 | -1.04 |
| ILMN_2115490 | NBPF20        | 2.44E-06 | -0.89 |
| ILMN_1683969 | FKBP1A        | 2.44E-06 | 1.03  |
| ILMN_2340259 | PDE4B         | 2.45E-06 | -0.60 |
| ILMN_1782389 | LAD1          | 2.51E-06 | 0.81  |
| ILMN_1757872 | DKFZp761P0423 | 2.52E-06 | 0.72  |
| ILMN_1656913 | MDH1          | 2.54E-06 | 0.78  |
| ILMN_1687757 | AKR1C4        | 2.54E-06 | -0.85 |
| ILMN_1713846 | PPM1H         | 2.59E-06 | -0.63 |
| ILMN_1685009 | ITGAM         | 2.59E-06 | 0.77  |
| ILMN_1730201 | DTNA          | 2.60E-06 | 0.64  |
| ILMN_1725791 | PTPLA         | 2.65E-06 | 0.82  |
| ILMN_2365248 | HVCN1         | 2.71E-06 | -0.65 |
| ILMN_2373791 | ENPP2         | 2.72E-06 | 1.13  |
| ILMN_2406501 | SOD2          | 2.72E-06 | -1.03 |
| ILMN_1683127 | ZNF281        | 2.73E-06 | -0.73 |
| ILMN_1657451 | SRPK2         | 2.80E-06 | 0.92  |
| ILMN_1707763 | ST7           | 2.83E-06 | 0.66  |
| ILMN_1771385 | GBP4          | 2.83E-06 | -0.59 |
| ILMN_1707727 | ANGPTL4       | 2.83E-06 | 1.41  |
| ILMN_2367818 | CD40          | 2.84E-06 | 0.62  |
| ILMN_1728435 | C12orf45      | 2.84E-06 | 0.78  |
| ILMN_1708537 | RBPJ          | 2.86E-06 | 0.74  |
| ILMN_1838863 |               | 2.88E-06 | 0.52  |
| ILMN_1703538 | AIF1          | 2.88E-06 | -0.85 |

|              |           |          |       |
|--------------|-----------|----------|-------|
| ILMN_2200917 | SLC4A7    | 2.90E-06 | 0.68  |
| ILMN_1673773 | GALNTL4   | 3.00E-06 | 0.66  |
| ILMN_2135272 | GIMAP2    | 3.00E-06 | -0.75 |
| ILMN_1802799 | AKIRIN1   | 3.00E-06 | 0.71  |
| ILMN_1784661 | TMEM2     | 3.06E-06 | -0.68 |
| ILMN_1666444 | RBMS1     | 3.12E-06 | 0.76  |
| ILMN_1802096 | ABTB1     | 3.15E-06 | -0.64 |
| ILMN_2171384 | CXCL5     | 3.15E-06 | -1.80 |
| ILMN_1723706 | GRAMD4    | 3.16E-06 | -0.64 |
| ILMN_1680132 | CADM1     | 3.16E-06 | -1.56 |
| ILMN_2168217 | EBI2      | 3.25E-06 | 0.88  |
| ILMN_1698952 | TNFRSF11A | 3.25E-06 | 0.60  |
| ILMN_1714108 | TP53INP1  | 3.37E-06 | -0.56 |
| ILMN_1707077 | SORT1     | 3.37E-06 | 0.68  |
| ILMN_2323944 | FAM110A   | 3.37E-06 | -0.56 |
| ILMN_1803256 | STOX2     | 3.39E-06 | -0.63 |
| ILMN_1772876 | ZNF395    | 3.42E-06 | -0.54 |
| ILMN_1718766 | MT1F      | 3.42E-06 | -0.83 |
| ILMN_1769299 | MTMR11    | 3.55E-06 | -0.44 |
| ILMN_2309926 | ZDHHC14   | 3.60E-06 | -0.45 |
| ILMN_1808919 | HPS4      | 3.63E-06 | -0.59 |
| ILMN_2115862 | ESPNL     | 3.64E-06 | 0.69  |
| ILMN_1812759 | GCH1      | 3.64E-06 | -0.50 |
| ILMN_1749070 | HLA-DPB1  | 3.66E-06 | 0.57  |
| ILMN_2114568 | GBP5      | 3.66E-06 | -0.78 |
| ILMN_1698218 | TRAF1     | 3.66E-06 | 0.98  |
| ILMN_1670325 | SLC47A1   | 3.66E-06 | 0.73  |
| ILMN_1751097 | CREB3L2   | 3.70E-06 | -0.66 |
| ILMN_1660544 | ARRDC4    | 3.70E-06 | 0.63  |
| ILMN_1737308 | GLRX      | 3.70E-06 | -0.83 |
| ILMN_1691376 | JAG1      | 3.70E-06 | 0.75  |
| ILMN_1711786 | NFE2      | 3.74E-06 | 0.82  |
| ILMN_1801303 | AMY2A     | 3.75E-06 | -0.60 |
| ILMN_1906187 |           | 3.88E-06 | 0.58  |
| ILMN_1847308 |           | 3.90E-06 | -0.55 |
| ILMN_2211003 | GAS2L3    | 3.95E-06 | 0.67  |
| ILMN_1712026 | NLRP3     | 4.01E-06 | -0.73 |
| ILMN_1864166 |           | 4.04E-06 | 0.65  |
| ILMN_2401873 | DUSP10    | 4.16E-06 | -0.63 |
| ILMN_1662795 | CA2       | 4.30E-06 | 1.31  |
| ILMN_1772821 | KIAA1671  | 4.30E-06 | 1.17  |
| ILMN_1712095 | FOXO4     | 4.44E-06 | -0.66 |
| ILMN_1764082 | MBOAT1    | 4.55E-06 | -0.58 |
| ILMN_1667260 | MAPK3     | 4.58E-06 | -0.63 |
| ILMN_2170949 | SNX10     | 4.58E-06 | -0.85 |
| ILMN_1662619 | TFPI      | 4.67E-06 | -0.63 |

|              |              |          |       |
|--------------|--------------|----------|-------|
| ILMN_1791147 | YPEL3        | 4.67E-06 | -0.81 |
| ILMN_2061043 | CD48         | 4.67E-06 | -0.67 |
| ILMN_1776602 | RNASE4       | 4.67E-06 | -0.97 |
| ILMN_1807540 | CBARA1       | 4.67E-06 | -0.67 |
| ILMN_1666932 | FCGR2A       | 4.67E-06 | -1.00 |
| ILMN_1806023 | JUN          | 4.69E-06 | 0.84  |
| ILMN_2146372 | KCTD6        | 4.69E-06 | 0.84  |
| ILMN_3260111 | LOC100129269 | 4.71E-06 | 0.76  |
| ILMN_1772964 | CCL8         | 4.72E-06 | 1.01  |
| ILMN_3235832 | LOC728835    | 4.75E-06 | 1.20  |
| ILMN_1743199 | EGR2         | 4.77E-06 | 1.38  |
| ILMN_2373763 | CASP7        | 4.81E-06 | 0.64  |
| ILMN_1727709 | GPBAR1       | 4.81E-06 | -0.62 |
| ILMN_1769876 | TBC1D2       | 4.85E-06 | -0.66 |
| ILMN_1785646 | PMP22        | 4.85E-06 | -1.35 |
| ILMN_2405684 | BIRC3        | 4.86E-06 | 0.72  |
| ILMN_1773906 | NCOA4        | 4.92E-06 | -0.70 |
| ILMN_1782050 | CEBPD        | 4.96E-06 | -1.06 |
| ILMN_1751789 | HNMT         | 5.11E-06 | -1.04 |
| ILMN_1811624 | THADA        | 5.20E-06 | -0.57 |
| ILMN_1754076 | CACNA2D3     | 5.28E-06 | -1.68 |
| ILMN_1768505 | IL13RA1      | 5.28E-06 | -0.63 |
| ILMN_1699644 | 42066        | 5.28E-06 | 0.50  |
| ILMN_1806908 | PRKCB1       | 5.29E-06 | -0.59 |
| ILMN_2060115 | SORL1        | 5.33E-06 | -0.66 |
| ILMN_1736112 | ARHGAP10     | 5.36E-06 | 0.64  |
| ILMN_2316236 | HOPX         | 5.37E-06 | 1.95  |
| ILMN_2159272 | PDCD1LG2     | 5.49E-06 | 0.87  |
| ILMN_2110908 | MYC          | 5.57E-06 | 0.68  |
| ILMN_1653166 | CLEC10A      | 5.59E-06 | 1.49  |
| ILMN_2095653 | AFMID        | 5.59E-06 | -1.35 |
| ILMN_1751464 | TNFSF9       | 5.68E-06 | -0.57 |
| ILMN_1704961 | ACTG1        | 5.69E-06 | 0.74  |
| ILMN_1688775 | METRNL       | 5.69E-06 | 0.94  |
| ILMN_1657977 | MSRB2        | 5.76E-06 | -0.74 |
| ILMN_2146761 | FABP5        | 5.87E-06 | 0.70  |
| ILMN_2093343 | PLAC8        | 5.93E-06 | -1.29 |
| ILMN_2358541 | RBMS1        | 5.95E-06 | 0.62  |
| ILMN_1766411 | AP1S2        | 5.97E-06 | -0.79 |
| ILMN_2294978 | RNASE4       | 6.08E-06 | -0.86 |
| ILMN_1808566 | TMEM180      | 6.15E-06 | -0.56 |
| ILMN_1747197 | SLC41A2      | 6.15E-06 | 0.68  |
| ILMN_1764380 | GLTP         | 6.30E-06 | -0.71 |
| ILMN_1727315 | DENND1A      | 6.34E-06 | 0.49  |
| ILMN_1671260 | GPR177       | 6.38E-06 | -0.57 |
| ILMN_2147435 | MAN2A1       | 6.38E-06 | 0.72  |

|              |          |          |       |
|--------------|----------|----------|-------|
| ILMN_1702787 | SEMA4A   | 6.55E-06 | 0.73  |
| ILMN_1744381 | SERPINE1 | 6.55E-06 | 0.72  |
| ILMN_1779257 | CD40     | 6.78E-06 | 0.63  |
| ILMN_1777233 | E2F2     | 6.96E-06 | -0.37 |
| ILMN_1774604 | PNKD     | 7.03E-06 | -0.68 |
| ILMN_1728742 | C5orf4   | 7.03E-06 | -0.58 |
| ILMN_1799889 | ATP6V0D2 | 7.07E-06 | -0.79 |
| ILMN_2376723 | CDKN2B   | 7.11E-06 | -0.73 |
| ILMN_1755974 | ALDOC    | 7.13E-06 | -0.60 |
| ILMN_2083946 | TGFA     | 7.13E-06 | 1.06  |
| ILMN_1664631 | ADAM28   | 7.21E-06 | -0.53 |
| ILMN_1775822 | PDGFB    | 7.26E-06 | 0.59  |
| ILMN_1740523 | KTN1     | 7.29E-06 | 0.45  |
| ILMN_1714602 | CD86     | 7.34E-06 | 0.81  |
| ILMN_2403228 | CLEC12A  | 7.38E-06 | -0.66 |
| ILMN_1696974 | ANG      | 7.41E-06 | -1.00 |
| ILMN_1669376 | DRAM1    | 7.45E-06 | -0.73 |
| ILMN_1730816 | GPR162   | 7.47E-06 | -0.74 |
| ILMN_2106725 | NCF1B    | 7.51E-06 | -0.53 |
| ILMN_1713505 | NPC1     | 7.51E-06 | 0.85  |
| ILMN_1793410 | SNTB1    | 7.51E-06 | -0.85 |
| ILMN_2374865 | ATF3     | 7.51E-06 | 1.09  |
| ILMN_2155719 | NBPF10   | 7.52E-06 | -0.89 |
| ILMN_1669321 | MATK     | 7.70E-06 | 0.41  |
| ILMN_1741727 | QPCT     | 7.73E-06 | 0.69  |
| ILMN_2400922 | OPRL1    | 7.84E-06 | -0.54 |
| ILMN_1749006 | RCSD1    | 7.97E-06 | -0.51 |
| ILMN_1781536 | FAH      | 8.17E-06 | -0.79 |
| ILMN_1657760 | SYT17    | 8.17E-06 | 0.49  |
| ILMN_1768031 | DEDD2    | 8.18E-06 | -0.66 |
| ILMN_1785071 | SEPP1    | 8.18E-06 | -1.14 |
| ILMN_1716815 | CEACAM1  | 8.20E-06 | -0.45 |
| ILMN_2173611 | MT1E     | 8.20E-06 | -0.80 |
| ILMN_3299520 | PRKCB    | 8.20E-06 | -0.46 |
| ILMN_1697629 | PLA2G4B  | 8.31E-06 | -0.51 |
| ILMN_2053415 | LDLR     | 8.31E-06 | -0.78 |
| ILMN_1745994 | GAS7     | 8.33E-06 | -0.54 |
| ILMN_1691156 | MT1A     | 8.35E-06 | -0.89 |
| ILMN_1807423 | IGF2BP3  | 8.40E-06 | -0.46 |
| ILMN_1808354 | SLC4A7   | 8.43E-06 | 0.64  |
| ILMN_2402341 | MAPK3    | 8.45E-06 | -0.48 |
| ILMN_1738010 | CTNS     | 8.45E-06 | 0.62  |
| ILMN_1802100 | ADAM28   | 8.45E-06 | -0.41 |
| ILMN_1700967 | C3orf59  | 8.55E-06 | -0.51 |
| ILMN_1752285 | RPL4     | 8.55E-06 | 0.84  |
| ILMN_1787212 | CDKN1A   | 8.61E-06 | 0.51  |

|              |           |          |       |
|--------------|-----------|----------|-------|
| ILMN_1763609 | SLC22A16  | 8.63E-06 | 0.68  |
| ILMN_1773363 | CIITA     | 8.72E-06 | 0.61  |
| ILMN_2120273 | AP1S2     | 8.75E-06 | -0.70 |
| ILMN_1779252 | TRIM22    | 8.75E-06 | -0.59 |
| ILMN_1764577 | MFNG      | 8.79E-06 | 0.80  |
| ILMN_1805175 | TGFA      | 8.85E-06 | 0.84  |
| ILMN_1674811 | OASL      | 8.94E-06 | -0.56 |
| ILMN_2310896 | NLRP3     | 9.84E-06 | -0.56 |
| ILMN_1726913 | RBPJ      | 9.93E-06 | 0.38  |
| ILMN_2294976 | RNASE4    | 9.96E-06 | -0.92 |
| ILMN_1689160 | DPEP2     | 9.99E-06 | -0.61 |
| ILMN_1689518 | PECAM1    | 1.00E-05 | -0.75 |
| ILMN_1749244 | LYRM1     | 1.01E-05 | 1.00  |
| ILMN_1755364 | RALA      | 1.01E-05 | -0.62 |
| ILMN_2408576 | FAM129B   | 1.01E-05 | 0.77  |
| ILMN_1689086 | CTSC      | 1.01E-05 | 0.55  |
| ILMN_1667825 | MLKL      | 1.02E-05 | -0.75 |
| ILMN_1784238 | SEC22B    | 1.02E-05 | -0.67 |
| ILMN_1810199 | ASRGL1    | 1.02E-05 | -0.41 |
| ILMN_1660847 | PFKFB3    | 1.03E-05 | -0.56 |
| ILMN_1697559 | G6PD      | 1.04E-05 | 0.66  |
| ILMN_2408572 | RNASE4    | 1.05E-05 | -0.65 |
| ILMN_2355168 | MGST1     | 1.08E-05 | -0.66 |
| ILMN_1717163 | F13A1     | 1.08E-05 | 1.42  |
| ILMN_2230892 | IL10RB    | 1.09E-05 | -0.58 |
| ILMN_1668526 | GVIN1     | 1.09E-05 | -0.53 |
| ILMN_1735930 | KLF2      | 1.09E-05 | 1.81  |
| ILMN_1807825 | LY86      | 1.09E-05 | -0.67 |
| ILMN_2307656 | AGTRAP    | 1.09E-05 | -0.62 |
| ILMN_1746888 | PCOLCE2   | 1.09E-05 | -0.49 |
| ILMN_1707748 | PIM3      | 1.10E-05 | 0.58  |
| ILMN_1719695 | NFKBIZ    | 1.11E-05 | -0.51 |
| ILMN_1695829 | TTYH2     | 1.11E-05 | 0.60  |
| ILMN_1734740 | GPR65     | 1.11E-05 | -0.75 |
| ILMN_2319000 | MATK      | 1.13E-05 | 1.01  |
| ILMN_1669703 | TNK2      | 1.14E-05 | -0.64 |
| ILMN_1693233 | KIAA0513  | 1.14E-05 | -0.57 |
| ILMN_2376403 | TSC22D3   | 1.16E-05 | -0.51 |
| ILMN_1709820 | AOAH      | 1.16E-05 | -0.64 |
| ILMN_1798256 | UPP1      | 1.18E-05 | 0.87  |
| ILMN_1680501 | GTF2IRD2B | 1.19E-05 | -0.53 |
| ILMN_2218648 | RAG1AP1   | 1.19E-05 | 0.52  |
| ILMN_1719627 | SLC27A3   | 1.19E-05 | 0.82  |
| ILMN_1796490 | GRINA     | 1.19E-05 | -0.63 |
| ILMN_1678627 | RUFY4     | 1.20E-05 | 0.30  |
| ILMN_1810725 | FAM129A   | 1.20E-05 | 0.74  |

|              |              |          |       |
|--------------|--------------|----------|-------|
| ILMN_1803609 | XKR3         | 1.21E-05 | 0.34  |
| ILMN_1741021 | CH25H        | 1.25E-05 | 1.11  |
| ILMN_2174574 | HNRNPA3P1    | 1.25E-05 | -0.48 |
| ILMN_1655930 | ELL2         | 1.25E-05 | -0.71 |
| ILMN_2046470 | DAAM1        | 1.25E-05 | 0.54  |
| ILMN_1711838 | SLC25A24     | 1.25E-05 | -0.63 |
| ILMN_1814789 | UBAP2L       | 1.26E-05 | 0.75  |
| ILMN_1776522 | RAG1AP1      | 1.26E-05 | 0.73  |
| ILMN_1764964 | IFNGR2       | 1.27E-05 | 0.59  |
| ILMN_1742981 | TUBA1A       | 1.27E-05 | 0.76  |
| ILMN_3251436 | DENND4C      | 1.27E-05 | 0.55  |
| ILMN_1658337 | AKIRIN1      | 1.27E-05 | 0.90  |
| ILMN_1684368 | C5orf62      | 1.29E-05 | -0.43 |
| ILMN_1683859 | SLC7A1       | 1.29E-05 | 0.69  |
| ILMN_1738523 | MYD88        | 1.31E-05 | -0.75 |
| ILMN_1758941 | REEP5        | 1.31E-05 | 0.59  |
| ILMN_1726591 | CARD16       | 1.34E-05 | -0.54 |
| ILMN_1772302 | MTHFS        | 1.34E-05 | -0.76 |
| ILMN_1677511 | PTGS2        | 1.34E-05 | -0.32 |
| ILMN_1743130 | PTGFRN       | 1.34E-05 | 0.53  |
| ILMN_1740875 | FPR2         | 1.34E-05 | -0.70 |
| ILMN_1687978 | PHLDA1       | 1.34E-05 | 0.83  |
| ILMN_1778599 | SP140        | 1.38E-05 | -0.57 |
| ILMN_1801610 | METRNL       | 1.45E-05 | 0.78  |
| ILMN_1699496 | PHF21A       | 1.46E-05 | -0.64 |
| ILMN_1720623 | SYTL3        | 1.46E-05 | -0.65 |
| ILMN_2339202 | KTN1         | 1.48E-05 | 0.75  |
| ILMN_1827736 |              | 1.49E-05 | -0.51 |
| ILMN_1772686 | FGD3         | 1.49E-05 | -0.78 |
| ILMN_1652680 | LOC652616    | 1.50E-05 | -0.81 |
| ILMN_1670672 | TMEM37       | 1.52E-05 | -0.48 |
| ILMN_1767523 | IL17RB       | 1.56E-05 | 1.97  |
| ILMN_1701441 | LPAR1        | 1.57E-05 | -0.54 |
| ILMN_3241091 | LOC100130886 | 1.57E-05 | -0.57 |
| ILMN_1812973 | RRP1B        | 1.57E-05 | 0.42  |
| ILMN_1773553 | FLJ46906     | 1.59E-05 | 0.47  |
| ILMN_1785170 | ARMCX2       | 1.59E-05 | -0.50 |
| ILMN_1704797 | CLEC10A      | 1.60E-05 | 1.16  |
| ILMN_1741165 | SLC11A1      | 1.60E-05 | -0.65 |
| ILMN_1681754 | GGH          | 1.60E-05 | -0.59 |
| ILMN_1780546 | OSM          | 1.63E-05 | -0.83 |
| ILMN_1801040 | SPN          | 1.66E-05 | 0.60  |
| ILMN_1812278 | LY9          | 1.67E-05 | 0.85  |
| ILMN_1720771 | STX11        | 1.67E-05 | -0.61 |
| ILMN_3232894 | CNRIP1       | 1.69E-05 | -0.65 |
| ILMN_2061732 | YRDC         | 1.70E-05 | 0.58  |

|              |              |          |       |
|--------------|--------------|----------|-------|
| ILMN_1693394 | BCKDK        | 1.70E-05 | 0.65  |
| ILMN_1721316 | TNFRSF10A    | 1.71E-05 | 0.43  |
| ILMN_1702175 | ST7          | 1.72E-05 | 0.61  |
| ILMN_1701789 | IFIT3        | 1.73E-05 | -0.65 |
| ILMN_1672662 | SLC20A1      | 1.73E-05 | 0.66  |
| ILMN_1723912 | IFI44L       | 1.73E-05 | -0.92 |
| ILMN_2415529 | CDK5RAP2     | 1.73E-05 | -0.51 |
| ILMN_1719611 | CCT6A        | 1.74E-05 | 0.43  |
| ILMN_1775501 | IL1B         | 1.74E-05 | -1.39 |
| ILMN_2324375 | CHCHD7       | 1.76E-05 | 0.53  |
| ILMN_1758623 | HIST1H2BD    | 1.76E-05 | -0.64 |
| ILMN_1662451 | FCER2        | 1.76E-05 | 1.05  |
| ILMN_2373831 | BTN3A3       | 1.76E-05 | -0.47 |
| ILMN_1719543 | MAF          | 1.79E-05 | 0.74  |
| ILMN_2091920 | PTCRA        | 1.79E-05 | 0.65  |
| ILMN_1798006 | ANKRD35      | 1.80E-05 | -0.54 |
| ILMN_1696485 | HNRNPAB      | 1.85E-05 | 0.42  |
| ILMN_1741133 | NME1         | 1.87E-05 | 0.66  |
| ILMN_2092850 | HPSE         | 1.88E-05 | -0.92 |
| ILMN_1657837 | ZC3H8        | 1.89E-05 | 0.63  |
| ILMN_1721842 | RYBP         | 1.90E-05 | 0.64  |
| ILMN_1913060 |              | 1.90E-05 | -0.84 |
| ILMN_3236239 | LOC100129550 | 1.90E-05 | -0.58 |
| ILMN_1684306 | S100A4       | 1.94E-05 | -0.70 |
| ILMN_2124802 | MT1H         | 1.94E-05 | -0.64 |
| ILMN_2389501 | HSD11B1      | 1.95E-05 | 0.65  |
| ILMN_1799744 | GALC         | 1.96E-05 | -0.70 |
| ILMN_1678353 | FARP1        | 1.98E-05 | 0.55  |
| ILMN_1672759 | CCDC109A     | 2.00E-05 | -0.48 |
| ILMN_1718063 | LIPA         | 2.04E-05 | 0.59  |
| ILMN_1800787 | RFTN1        | 2.04E-05 | 0.85  |
| ILMN_1806249 | IL1RN        | 2.06E-05 | 0.34  |
| ILMN_2165867 | DHCR7        | 2.10E-05 | -0.50 |
| ILMN_1773125 | ENTPD1       | 2.11E-05 | -0.48 |
| ILMN_1790537 | C16orf75     | 2.11E-05 | 0.53  |
| ILMN_2141482 | SERPINF1     | 2.12E-05 | -0.38 |
| ILMN_1701613 | RARRES3      | 2.12E-05 | -0.62 |
| ILMN_1779353 | PUS7         | 2.13E-05 | 0.37  |
| ILMN_2100357 | SMPDL3A      | 2.13E-05 | -0.44 |
| ILMN_1654289 | ELK1         | 2.13E-05 | 0.53  |
| ILMN_1683806 | MRC1L1       | 2.13E-05 | 0.45  |
| ILMN_2049536 | TRPV2        | 2.17E-05 | 0.60  |
| ILMN_1765701 | LOC399942    | 2.17E-05 | 0.62  |
| ILMN_1716105 | NLRP12       | 2.17E-05 | -0.43 |
| ILMN_1724250 | GRN          | 2.18E-05 | -0.61 |
| ILMN_1701933 | SNCA         | 2.20E-05 | -0.72 |



|              |              |          |       |
|--------------|--------------|----------|-------|
| ILMN_1718297 | EML4         | 2.20E-05 | 0.70  |
| ILMN_3307659 | SFT2D2       | 2.21E-05 | 0.63  |
| ILMN_1762529 | SLC12A8      | 2.26E-05 | -0.39 |
| ILMN_2243308 | ACVR1B       | 2.32E-05 | -0.49 |
| ILMN_1760247 | CD70         | 2.35E-05 | -0.63 |
| ILMN_3240389 | CPOX         | 2.36E-05 | -0.50 |
| ILMN_1776121 | MGC42367     | 2.38E-05 | -0.42 |
| ILMN_1688152 | IL27RA       | 2.39E-05 | 0.60  |
| ILMN_1770161 | BST1         | 2.40E-05 | -0.42 |
| ILMN_1756920 | ADAM15       | 2.40E-05 | 0.56  |
| ILMN_1668063 | FCN1         | 2.42E-05 | -0.82 |
| ILMN_1738552 | SLC1A3       | 2.45E-05 | -0.59 |
| ILMN_1665865 | IGFBP4       | 2.46E-05 | -0.44 |
| ILMN_2373515 | HSP90AA1     | 2.46E-05 | 0.50  |
| ILMN_3237270 | LOC100133609 | 2.46E-05 | 0.39  |
| ILMN_1714167 | CYB5A        | 2.47E-05 | -0.71 |
| ILMN_2372915 | P2RY2        | 2.48E-05 | -0.54 |
| ILMN_1657871 | RSAD2        | 2.49E-05 | -0.75 |
| ILMN_1754114 | FLJ20021     | 2.53E-05 | -0.54 |
| ILMN_3257030 | FTHL16       | 2.55E-05 | -0.59 |
| ILMN_2080611 | PDSS1        | 2.57E-05 | 0.56  |
| ILMN_1695590 | ADRB2        | 2.57E-05 | -0.81 |
| ILMN_3247848 | NCRNA00085   | 2.57E-05 | -0.46 |
| ILMN_1767320 | MAPK1        | 2.57E-05 | 0.48  |
| ILMN_1662799 | GPSM3        | 2.57E-05 | -0.61 |
| ILMN_2381138 | SEH1L        | 2.58E-05 | 0.37  |
| ILMN_1790014 | METRNL       | 2.58E-05 | 0.67  |
| ILMN_3234142 | LOC728855    | 2.58E-05 | -0.49 |
| ILMN_1669888 | CSTA         | 2.58E-05 | -0.54 |
| ILMN_1800261 | TUBA1B       | 2.58E-05 | 0.60  |
| ILMN_3187680 | ACCS         | 2.58E-05 | -0.49 |
| ILMN_1797974 | AIG1         | 2.58E-05 | 0.32  |
| ILMN_1722981 | TLR5         | 2.61E-05 | -0.52 |
| ILMN_1759818 | SORL1        | 2.62E-05 | -0.69 |
| ILMN_1714592 | CDA          | 2.65E-05 | -0.69 |
| ILMN_1733937 | MMD          | 2.65E-05 | 0.58  |
| ILMN_1734476 | KIF2A        | 2.68E-05 | 0.49  |
| ILMN_1706677 | MAPK1        | 2.69E-05 | 0.34  |
| ILMN_1813936 | DNAH3        | 2.75E-05 | 0.29  |
| ILMN_1804174 | FCGR2B       | 2.76E-05 | 0.41  |
| ILMN_2231928 | MX2          | 2.76E-05 | -0.60 |
| ILMN_1766054 | ABCA1        | 2.77E-05 | -0.80 |
| ILMN_1720889 | SC4MOL       | 2.79E-05 | -0.67 |
| ILMN_1711909 | EDEM2        | 2.80E-05 | -0.55 |
| ILMN_1739001 | TACSTD2      | 2.80E-05 | 0.60  |
| ILMN_1665859 | RAB27A       | 2.80E-05 | -0.50 |

|              |              |          |       |
|--------------|--------------|----------|-------|
| ILMN_1755873 | EMR3         | 2.80E-05 | -0.35 |
| ILMN_2173524 | FOXD4        | 2.83E-05 | 1.10  |
| ILMN_2340052 | NCOR2        | 2.87E-05 | 0.58  |
| ILMN_1740170 | CHCHD10      | 2.89E-05 | 0.62  |
| ILMN_1652716 | THEX1        | 2.91E-05 | 0.47  |
| ILMN_1787265 | ZNF503       | 2.93E-05 | -0.46 |
| ILMN_2145116 | TMEM173      | 2.96E-05 | -0.62 |
| ILMN_1652409 | SPATA7       | 2.97E-05 | -0.56 |
| ILMN_3247462 | GLRX3        | 2.98E-05 | 0.68  |
| ILMN_1653026 | PLAC8        | 2.99E-05 | -1.07 |
| ILMN_1759175 | DUSP10       | 2.99E-05 | -0.30 |
| ILMN_2052891 | PKD2         | 2.99E-05 | 0.61  |
| ILMN_1768812 | FXVD6        | 2.99E-05 | -0.42 |
| ILMN_1748124 | TSC22D3      | 2.99E-05 | -0.57 |
| ILMN_1656910 | TRIM6        | 2.99E-05 | -0.46 |
| ILMN_1750003 | CD200R1      | 3.03E-05 | 0.85  |
| ILMN_1706610 | PLEKHA9      | 3.04E-05 | -0.44 |
| ILMN_1661264 | SHMT2        | 3.06E-05 | 0.52  |
| ILMN_1769013 | ASGR1        | 3.06E-05 | -0.68 |
| ILMN_1682332 | GYPC         | 3.06E-05 | -0.66 |
| ILMN_1761531 | SGPL1        | 3.07E-05 | 0.50  |
| ILMN_2094061 | IMPA2        | 3.16E-05 | -0.53 |
| ILMN_1795561 | CAMK1D       | 3.16E-05 | 0.50  |
| ILMN_1664761 | TMEM138      | 3.16E-05 | -0.78 |
| ILMN_2215631 | OTUD6B       | 3.19E-05 | 0.44  |
| ILMN_1672605 | C7orf41      | 3.27E-05 | -0.34 |
| ILMN_2372413 | BID          | 3.30E-05 | 0.54  |
| ILMN_2379788 | HIF1A        | 3.31E-05 | -0.61 |
| ILMN_1838313 |              | 3.31E-05 | 0.98  |
| ILMN_2307598 | SLC37A3      | 3.36E-05 | 0.47  |
| ILMN_3280402 | LOC100132510 | 3.36E-05 | -0.78 |
| ILMN_1733579 | EVI2A        | 3.41E-05 | -0.52 |
| ILMN_3230608 | NBPF8        | 3.46E-05 | -0.71 |
| ILMN_1777915 | STX6         | 3.46E-05 | -0.54 |
| ILMN_2343105 | LIPT1        | 3.46E-05 | -0.40 |
| ILMN_1683096 | ASB1         | 3.48E-05 | -0.42 |
| ILMN_1713450 | MYL6B        | 3.48E-05 | -0.53 |
| ILMN_2227248 | SLAMF9       | 3.48E-05 | -0.55 |
| ILMN_3246560 | EMB          | 3.48E-05 | 0.28  |
| ILMN_2150196 | LRRC25       | 3.55E-05 | -0.64 |
| ILMN_1705663 | DMXL2        | 3.55E-05 | -0.52 |
| ILMN_2258268 | GLRX2        | 3.55E-05 | 0.45  |
| ILMN_2338116 | TRAF5        | 3.55E-05 | 0.46  |
| ILMN_2073202 | MEI1         | 3.55E-05 | -0.35 |
| ILMN_1853167 |              | 3.55E-05 | -0.50 |
| ILMN_1780132 | PELI2        | 3.56E-05 | -0.48 |

|              |           |          |       |
|--------------|-----------|----------|-------|
| ILMN_1702636 | TUBB6     | 3.58E-05 | 0.59  |
| ILMN_1690289 | DUOX1     | 3.59E-05 | 0.28  |
| ILMN_1773760 | PAICS     | 3.63E-05 | 0.39  |
| ILMN_3247723 | NOP16     | 3.63E-05 | 0.46  |
| ILMN_1655645 | AK2       | 3.63E-05 | 0.35  |
| ILMN_1706523 | FCGR2A    | 3.70E-05 | -0.48 |
| ILMN_2138589 | MERTK     | 3.71E-05 | -0.69 |
| ILMN_1778845 | FAM111A   | 3.71E-05 | -0.42 |
| ILMN_1684227 | GPR146    | 3.75E-05 | 0.35  |
| ILMN_2069224 | PVALB     | 3.75E-05 | -0.75 |
| ILMN_3304022 | LOC729102 | 3.75E-05 | 0.52  |
| ILMN_2366391 | PRDX1     | 3.79E-05 | -0.53 |
| ILMN_1756541 | MXD4      | 3.81E-05 | -0.60 |
| ILMN_1763452 | EVI2B     | 3.82E-05 | -0.59 |
| ILMN_1765994 | ZBP1      | 3.92E-05 | -0.35 |
| ILMN_1767658 | RRS1      | 3.94E-05 | 0.35  |
| ILMN_3210741 | LOC642956 | 3.94E-05 | 0.67  |
| ILMN_1730639 | SLC22A15  | 3.96E-05 | -0.42 |
| ILMN_2183389 | TTC9C     | 3.97E-05 | 0.73  |
| ILMN_1750373 | KAL1      | 3.98E-05 | -0.36 |
| ILMN_1656934 | REPS2     | 4.00E-05 | -0.50 |
| ILMN_1797031 | HSPBAP1   | 4.00E-05 | -0.56 |
| ILMN_1742929 | HESX1     | 4.00E-05 | -0.46 |
| ILMN_2393456 | DDO       | 4.00E-05 | 0.25  |
| ILMN_1667748 | ANKRD33   | 4.00E-05 | -0.50 |
| ILMN_2389506 | HSD11B1   | 4.06E-05 | 0.54  |
| ILMN_1804935 | VNN3      | 4.06E-05 | -0.42 |
| ILMN_1682572 | KIAA0528  | 4.06E-05 | -0.57 |
| ILMN_1910948 |           | 4.10E-05 | 0.46  |
| ILMN_1714278 | C9orf30   | 4.10E-05 | 0.53  |
| ILMN_1758311 | NET1      | 4.15E-05 | 0.63  |
| ILMN_1659953 | 42250     | 4.17E-05 | 0.45  |
| ILMN_1655702 | ABHD5     | 4.18E-05 | -0.51 |
| ILMN_1727689 | TNFAIP2   | 4.26E-05 | -0.43 |
| ILMN_1725241 | GSTK1     | 4.31E-05 | 0.61  |
| ILMN_1778444 | FKBP5     | 4.33E-05 | 0.48  |
| ILMN_1651496 | HIST1H2BD | 4.33E-05 | -0.58 |
| ILMN_2137789 | KLF4      | 4.34E-05 | 0.41  |
| ILMN_1806165 | HSPA6     | 4.34E-05 | -0.75 |
| ILMN_1768035 | MMP12     | 4.35E-05 | 0.48  |
| ILMN_2350183 | ST5       | 4.38E-05 | -0.31 |
| ILMN_2096322 | ADIPOR1   | 4.38E-05 | -0.53 |
| ILMN_1781560 | ST3GAL6   | 4.39E-05 | -0.54 |
| ILMN_1692219 | RAB11FIP1 | 4.40E-05 | -0.63 |
| ILMN_1723486 | HK2       | 4.44E-05 | -0.75 |
| ILMN_1710434 | TBC1D10C  | 4.44E-05 | 0.54  |

|              |           |          |       |
|--------------|-----------|----------|-------|
| ILMN_1739641 | MTMR3     | 4.47E-05 | -0.60 |
| ILMN_1713143 | MRPL3     | 4.48E-05 | 0.60  |
| ILMN_1672834 | SSH2      | 4.48E-05 | -0.46 |
| ILMN_1670305 | SERPING1  | 4.48E-05 | -0.55 |
| ILMN_2232430 | NMD3      | 4.50E-05 | 0.56  |
| ILMN_2246328 | PTPN22    | 4.50E-05 | -0.48 |
| ILMN_2131177 | GUCY1A3   | 4.50E-05 | 0.25  |
| ILMN_1756572 | COQ2      | 4.50E-05 | -0.50 |
| ILMN_1728684 | PELP1     | 4.50E-05 | 0.51  |
| ILMN_1689004 | TNFRSF12A | 4.50E-05 | 0.57  |
| ILMN_1657632 | ZMYM6     | 4.50E-05 | -0.56 |
| ILMN_2383707 | ALDH1A2   | 4.52E-05 | 0.66  |
| ILMN_2338452 | SERPINA1  | 4.53E-05 | -0.56 |
| ILMN_1722622 | CD163     | 4.54E-05 | -0.69 |
| ILMN_1801766 | CCDC109B  | 4.56E-05 | -0.63 |
| ILMN_1737157 | GRAMD1A   | 4.56E-05 | 0.61  |
| ILMN_1741096 | FDFT1     | 4.64E-05 | -0.52 |
| ILMN_1698419 | NCOR2     | 4.67E-05 | 0.49  |
| ILMN_1793615 | ME3       | 4.68E-05 | 0.30  |
| ILMN_2345898 | SLA       | 4.69E-05 | 0.79  |
| ILMN_2073157 | AMY2B     | 4.69E-05 | -0.33 |
| ILMN_2408112 | CD200R1   | 4.69E-05 | 0.78  |
| ILMN_2381397 | HSPD1     | 4.69E-05 | 0.53  |
| ILMN_1754538 | C10orf58  | 4.71E-05 | -0.64 |
| ILMN_3251341 | TUBA1C    | 4.72E-05 | 0.52  |
| ILMN_2342066 | METRNL    | 4.74E-05 | 0.74  |
| ILMN_1738095 | PER2      | 4.78E-05 | 0.50  |
| ILMN_1652918 | RHOF      | 4.80E-05 | 0.47  |
| ILMN_1756685 | DEPDC6    | 4.92E-05 | -0.27 |
| ILMN_2091846 | FTHL2     | 4.99E-05 | -0.55 |
| ILMN_1668743 | LOC728069 | 5.01E-05 | -0.59 |
| ILMN_1689088 | COLEC12   | 5.05E-05 | -1.23 |
| ILMN_1665331 | AMT       | 5.05E-05 | -0.50 |
| ILMN_1747650 | BMP6      | 5.06E-05 | 0.36  |
| ILMN_1800461 | CSNK2B    | 5.10E-05 | 0.57  |
| ILMN_1704055 | HSPC111   | 5.12E-05 | 0.44  |
| ILMN_1730032 | BOK       | 5.23E-05 | -0.59 |
| ILMN_2149494 | NPL       | 5.23E-05 | -0.69 |
| ILMN_1772218 | HLA-DPA1  | 5.23E-05 | 0.60  |
| ILMN_1767448 | LHFP      | 5.24E-05 | 0.98  |
| ILMN_1750674 | SDSL      | 5.25E-05 | -0.70 |
| ILMN_1767661 | LOC648907 | 5.26E-05 | 0.31  |
| ILMN_2043452 | FANCE     | 5.29E-05 | -0.84 |
| ILMN_3251423 | CHDH      | 5.29E-05 | 0.51  |
| ILMN_1774800 | KTELC1    | 5.34E-05 | 0.47  |
| ILMN_2410038 | FAM111A   | 5.38E-05 | -0.56 |

|              |           |          |       |
|--------------|-----------|----------|-------|
| ILMN_1810275 | SLC7A7    | 5.43E-05 | -0.54 |
| ILMN_1758673 | SLC44A1   | 5.43E-05 | -0.63 |
| ILMN_1652198 | CCM2      | 5.43E-05 | -0.56 |
| ILMN_1668374 | ITGB5     | 5.52E-05 | -0.51 |
| ILMN_2246882 | SP140     | 5.58E-05 | -0.42 |
| ILMN_3285959 | LOC645515 | 5.66E-05 | 0.41  |
| ILMN_1767360 | IL10RB    | 5.70E-05 | -0.52 |
| ILMN_2148819 | TUBA1A    | 5.72E-05 | 0.50  |
| ILMN_1744795 | TBL1X     | 5.73E-05 | -0.45 |
| ILMN_1800942 | KCTD6     | 5.75E-05 | 0.64  |
| ILMN_1724066 | PLCB2     | 5.75E-05 | 0.49  |
| ILMN_1701461 | TIMP3     | 5.76E-05 | 0.58  |
| ILMN_1658398 | C3orf41   | 5.77E-05 | 0.27  |
| ILMN_2336781 | SOD2      | 5.77E-05 | -0.64 |
| ILMN_1747344 | IL3RA     | 5.77E-05 | 0.80  |
| ILMN_1766165 | SNCA      | 5.77E-05 | -0.51 |
| ILMN_1669599 | DENND4C   | 5.77E-05 | 0.54  |
| ILMN_1704873 | TCEB1     | 5.83E-05 | 0.62  |
| ILMN_2164242 | UBE2F     | 5.83E-05 | 0.58  |
| ILMN_2382403 | FCGR2B    | 5.83E-05 | 0.31  |
| ILMN_1732296 | ID3       | 5.83E-05 | -0.93 |
| ILMN_1715024 | LSS       | 5.83E-05 | -0.49 |
| ILMN_1807894 | SLC7A8    | 5.86E-05 | 0.50  |
| ILMN_1795089 | RASAL3    | 5.96E-05 | -0.53 |
| ILMN_1701514 | TRAF3IP2  | 5.96E-05 | -0.58 |
| ILMN_1714397 | CRYL1     | 5.98E-05 | -0.45 |
| ILMN_2407389 | GPNMB     | 6.02E-05 | -0.53 |
| ILMN_1654389 | LOC728744 | 6.02E-05 | -0.37 |
| ILMN_1760303 | PIK3R1    | 6.03E-05 | 0.64  |
| ILMN_1715013 | ERMAP     | 6.06E-05 | -0.38 |
| ILMN_1803560 | LAT2      | 6.07E-05 | -0.46 |
| ILMN_1803423 | ARHGEF6   | 6.10E-05 | -0.49 |
| ILMN_1774596 | BSCL2     | 6.20E-05 | -0.52 |
| ILMN_1715864 | NHS       | 6.28E-05 | -0.38 |
| ILMN_1804822 | SRXN1     | 6.30E-05 | 0.51  |
| ILMN_1789510 | STIP1     | 6.33E-05 | 0.58  |
| ILMN_1690352 | ADO       | 6.33E-05 | 0.64  |
| ILMN_1654560 | TLR6      | 6.33E-05 | -0.45 |
| ILMN_1689251 | SPG3A     | 6.39E-05 | 0.41  |
| ILMN_1653529 | TEX10     | 6.45E-05 | 0.39  |
| ILMN_3200362 | LOC727908 | 6.46E-05 | -0.61 |
| ILMN_2083469 | IRS2      | 6.46E-05 | -0.50 |
| ILMN_1713182 | LOC653879 | 6.48E-05 | -0.41 |
| ILMN_1791232 | SPRED2    | 6.48E-05 | 0.38  |
| ILMN_1801833 | ARHGAP24  | 6.55E-05 | -0.43 |
| ILMN_1671482 | GALM      | 6.55E-05 | 0.59  |

|              |           |          |       |
|--------------|-----------|----------|-------|
| ILMN_1723846 | FAM119B   | 6.56E-05 | 0.57  |
| ILMN_1706886 | BCL7A     | 6.63E-05 | 0.23  |
| ILMN_1660027 | FCGR2B    | 6.63E-05 | 0.88  |
| ILMN_1707695 | IFIT1     | 6.64E-05 | -0.59 |
| ILMN_1680955 | AURKA     | 6.69E-05 | 0.45  |
| ILMN_1783285 | CTPS      | 6.73E-05 | 0.31  |
| ILMN_1767816 | APH1B     | 6.74E-05 | -0.47 |
| ILMN_1802557 | HEBP1     | 6.77E-05 | -0.52 |
| ILMN_1801205 | GPNMB     | 6.78E-05 | -0.55 |
| ILMN_2201966 | N4BP1     | 6.82E-05 | 0.41  |
| ILMN_1656145 | GOT1      | 6.84E-05 | 0.60  |
| ILMN_2405305 | ARNTL     | 6.84E-05 | 0.42  |
| ILMN_1655796 | 42066     | 6.91E-05 | 0.57  |
| ILMN_1657361 | CBX7      | 6.92E-05 | -0.41 |
| ILMN_1696317 | CACNA2D4  | 6.97E-05 | -0.48 |
| ILMN_1789702 | GBE1      | 6.97E-05 | -0.47 |
| ILMN_1703123 | AXUD1     | 6.99E-05 | 0.54  |
| ILMN_1748915 | S100A12   | 7.02E-05 | -0.35 |
| ILMN_2150095 | CES4      | 7.05E-05 | -0.27 |
| ILMN_1676588 | CEPT1     | 7.08E-05 | 0.51  |
| ILMN_1746578 | SLC23A2   | 7.08E-05 | -0.51 |
| ILMN_1664644 | ATG16L2   | 7.13E-05 | -0.48 |
| ILMN_1716909 | ADAMDEC1  | 7.20E-05 | -0.52 |
| ILMN_2375992 | SPINT1    | 7.20E-05 | 0.36  |
| ILMN_1782070 | NPL       | 7.21E-05 | -0.70 |
| ILMN_2233539 | SLC39A8   | 7.21E-05 | -0.55 |
| ILMN_1692466 | LOC728637 | 7.29E-05 | -0.43 |
| ILMN_1703324 | PDSS1     | 7.29E-05 | 0.47  |
| ILMN_2117623 | PLXNC1    | 7.29E-05 | -0.33 |
| ILMN_1711627 | SIAH1     | 7.29E-05 | 0.50  |
| ILMN_2401258 | FAM13A    | 7.30E-05 | -0.62 |
| ILMN_2099277 | HTRA4     | 7.48E-05 | -0.66 |
| ILMN_2103107 | ADAMDEC1  | 7.53E-05 | -0.46 |
| ILMN_1740772 | APBB3     | 7.70E-05 | -0.45 |
| ILMN_1777190 | CFD       | 7.70E-05 | -0.63 |
| ILMN_2195914 | GGH       | 7.71E-05 | -0.60 |
| ILMN_3241378 | LOC728448 | 7.71E-05 | -0.36 |
| ILMN_1788180 | RAB13     | 7.71E-05 | -0.55 |
| ILMN_1770610 | MERTK     | 7.71E-05 | -0.63 |
| ILMN_2081883 | IQCK      | 7.72E-05 | -0.40 |
| ILMN_1760201 | DNMT1     | 7.80E-05 | 0.59  |
| ILMN_2309180 | SMARCD3   | 7.84E-05 | -0.43 |
| ILMN_1715715 | CEBPA     | 7.96E-05 | 0.65  |
| ILMN_2219246 | LOC162073 | 7.97E-05 | 0.24  |
| ILMN_1656057 | PLAU      | 7.99E-05 | 0.62  |
| ILMN_1700660 | RNF135    | 8.17E-05 | -0.51 |

|              |              |          |       |
|--------------|--------------|----------|-------|
| ILMN_1768534 | BHLHB2       | 8.29E-05 | 0.69  |
| ILMN_1678454 | CASP4        | 8.31E-05 | -0.52 |
| ILMN_1654630 | FAM193B      | 8.38E-05 | -0.42 |
| ILMN_2185884 | DHRS4        | 8.38E-05 | -0.69 |
| ILMN_1691760 | FAM45A       | 8.63E-05 | -0.46 |
| ILMN_2380566 | SIAH1        | 8.75E-05 | 0.59  |
| ILMN_1756806 | MCL1         | 8.75E-05 | 0.49  |
| ILMN_2196097 | PPP2CA       | 8.82E-05 | 0.48  |
| ILMN_2083243 | MNAT1        | 8.84E-05 | 0.34  |
| ILMN_3205353 | LOC100131294 | 8.89E-05 | -0.33 |
| ILMN_1718206 | KIAA0100     | 8.93E-05 | 0.41  |
| ILMN_1763260 | HIF1A        | 9.10E-05 | -0.52 |
| ILMN_1798706 | EBI2         | 9.10E-05 | 0.85  |
| ILMN_2215119 | SYNJ2        | 9.16E-05 | 0.32  |
| ILMN_1688373 | LST1         | 9.18E-05 | -0.45 |
| ILMN_1776188 | MAP1LC3A     | 9.21E-05 | -0.60 |
| ILMN_2365091 | FCAR         | 9.22E-05 | -0.40 |
| ILMN_1651262 | HNRNPAB      | 9.23E-05 | 0.49  |
| ILMN_1695354 | BMF          | 9.24E-05 | -0.32 |
| ILMN_1683313 | ST3GAL1      | 9.26E-05 | -0.54 |
| ILMN_1652797 | FAM174B      | 9.35E-05 | -0.31 |
| ILMN_1782881 | DLEU7        | 9.37E-05 | -0.27 |
| ILMN_1776157 | 42251        | 9.43E-05 | -0.39 |
| ILMN_2110252 | NPM3         | 9.43E-05 | 0.50  |
| ILMN_1815345 | EIF3J        | 9.44E-05 | 0.45  |
| ILMN_1767349 | ABCB4        | 9.45E-05 | 0.29  |
| ILMN_2359287 | ITGA6        | 9.46E-05 | -0.35 |
| ILMN_1688780 | S100A4       | 9.47E-05 | -0.56 |
| ILMN_1753312 | PLXDC2       | 9.55E-05 | -0.51 |
| ILMN_1795839 | SCCPDH       | 9.55E-05 | -0.60 |
| ILMN_1674183 | MT1JP        | 9.62E-05 | -0.36 |
| ILMN_1781952 | MGST1        | 9.63E-05 | -0.51 |
| ILMN_2375599 | RNH1         | 9.69E-05 | 0.54  |
| ILMN_1738921 | ACAA1        | 9.73E-05 | -0.49 |
| ILMN_1677827 | TLR7         | 9.76E-05 | -1.03 |
| ILMN_1781867 | FOXD4L1      | 9.82E-05 | 0.97  |
| ILMN_1746368 | SELT         | 9.84E-05 | 0.46  |
| ILMN_1745904 | CCDC6        | 9.87E-05 | 0.62  |
| ILMN_1654112 | PARD6A       | 9.89E-05 | -0.34 |
| ILMN_1660232 | PEX5         | 9.90E-05 | -0.44 |
| ILMN_1695851 | PARVG        | 9.90E-05 | -0.49 |
| ILMN_1861376 |              | 9.90E-05 | -0.35 |
| ILMN_1688322 | ADIPOR1      | 9.90E-05 | -0.45 |
| ILMN_1760062 | IFI44        | 9.90E-05 | -0.57 |
| ILMN_1673991 | ATIC         | 9.95E-05 | 0.49  |
| ILMN_2262044 | PARP10       | 9.96E-05 | -0.49 |

|              |              |          |       |
|--------------|--------------|----------|-------|
| ILMN_2153332 | ATXN1        | 1.00E-04 | 0.71  |
| ILMN_2341254 | STARD13      | 1.02E-04 | -0.37 |
| ILMN_2403534 | ALOX15       | 1.02E-04 | 0.87  |
| ILMN_1683682 | DAGLA        | 1.02E-04 | 0.60  |
| ILMN_1687315 | RXRA         | 1.02E-04 | -0.52 |
| ILMN_2072178 | ECHDC3       | 1.02E-04 | 0.51  |
| ILMN_2195821 | C5orf41      | 1.03E-04 | -0.48 |
| ILMN_1700143 | FRMD4B       | 1.03E-04 | -0.59 |
| ILMN_1691097 | HSP90AA1     | 1.05E-04 | 0.56  |
| ILMN_1772667 | P2RY1        | 1.05E-04 | 0.23  |
| ILMN_1811616 | EEPD1        | 1.05E-04 | 0.39  |
| ILMN_1716468 | LOC152195    | 1.05E-04 | 0.46  |
| ILMN_1746952 | LOC153328    | 1.05E-04 | 0.21  |
| ILMN_1698404 | ERN1         | 1.05E-04 | -0.47 |
| ILMN_1736042 | ME1          | 1.06E-04 | -0.47 |
| ILMN_3250257 | ACVRL1       | 1.07E-04 | -0.50 |
| ILMN_1671191 | UQCRC1       | 1.09E-04 | 0.58  |
| ILMN_1715273 | PICALM       | 1.09E-04 | 0.64  |
| ILMN_1753342 | SAT1         | 1.09E-04 | -0.53 |
| ILMN_1698605 | TMEM43       | 1.10E-04 | 0.50  |
| ILMN_2208413 | ARHGAP15     | 1.10E-04 | -0.64 |
| ILMN_1671337 | SLC2A5       | 1.12E-04 | -1.14 |
| ILMN_1692962 | CTDSP2       | 1.12E-04 | -0.56 |
| ILMN_1712431 | FAM113B      | 1.13E-04 | -0.70 |
| ILMN_1685676 | TTC9C        | 1.15E-04 | 0.53  |
| ILMN_1760849 | NETO2        | 1.15E-04 | 0.33  |
| ILMN_1723198 | CDKN2B       | 1.16E-04 | -0.48 |
| ILMN_1719696 | PLD1         | 1.18E-04 | -0.54 |
| ILMN_2345353 | LST1         | 1.18E-04 | -0.49 |
| ILMN_1698225 | MYO5A        | 1.19E-04 | -0.47 |
| ILMN_1731048 | TLR1         | 1.20E-04 | -0.52 |
| ILMN_1750722 | RPS7         | 1.21E-04 | 0.39  |
| ILMN_1696622 | SLC38A6      | 1.21E-04 | 0.54  |
| ILMN_3246538 | LOC100133866 | 1.21E-04 | -0.61 |
| ILMN_1660880 | RNH1         | 1.22E-04 | 0.47  |
| ILMN_1703926 | PTGER2       | 1.22E-04 | 0.50  |
| ILMN_1906423 |              | 1.23E-04 | 0.95  |
| ILMN_1687301 | VCAN         | 1.23E-04 | -0.29 |
| ILMN_1772703 | OTUD6B       | 1.23E-04 | 0.30  |
| ILMN_1752728 | FUCA1        | 1.23E-04 | -0.51 |
| ILMN_1726720 | NUSAP1       | 1.23E-04 | -0.40 |
| ILMN_1782560 | CD86         | 1.24E-04 | 0.74  |
| ILMN_2173835 | FTHL3        | 1.25E-04 | -0.45 |
| ILMN_1743194 | EEA1         | 1.27E-04 | 0.28  |
| ILMN_1838310 |              | 1.27E-04 | 0.48  |
| ILMN_1757406 | HIST1H1C     | 1.27E-04 | -0.61 |



|              |           |          |       |
|--------------|-----------|----------|-------|
| ILMN_1800733 | MANBA     | 1.27E-04 | -0.54 |
| ILMN_1715131 | CCR7      | 1.28E-04 | 0.73  |
| ILMN_1693804 | LOC652675 | 1.28E-04 | 0.30  |
| ILMN_3290497 | LOC643863 | 1.30E-04 | -0.47 |
| ILMN_1722738 | ROGDI     | 1.31E-04 | 0.34  |
| ILMN_1729188 | HAMP      | 1.33E-04 | -0.53 |
| ILMN_1890614 |           | 1.34E-04 | 0.43  |
| ILMN_1661439 | FLOT1     | 1.34E-04 | -0.47 |
| ILMN_1790412 | FLJ39639  | 1.34E-04 | -0.29 |
| ILMN_1694589 | PAQR8     | 1.34E-04 | -0.46 |
| ILMN_1691717 | RHBDF2    | 1.34E-04 | -0.57 |
| ILMN_1726245 | TGFBR2    | 1.35E-04 | -0.50 |
| ILMN_3234831 | LOC645296 | 1.35E-04 | -0.46 |
| ILMN_1792689 | HIST1H2AC | 1.35E-04 | -0.54 |
| ILMN_1763386 | BID       | 1.36E-04 | 0.56  |
| ILMN_1778237 | FN1       | 1.36E-04 | 0.21  |
| ILMN_1695485 | C9orf109  | 1.37E-04 | -0.35 |
| ILMN_1719139 | LOC643424 | 1.37E-04 | -0.34 |
| ILMN_1711223 | LOC649362 | 1.38E-04 | -0.56 |
| ILMN_2381697 | P4HA2     | 1.38E-04 | 0.43  |
| ILMN_1800425 | SLC9A1    | 1.38E-04 | -0.47 |
| ILMN_1673676 | SNX5      | 1.39E-04 | 0.43  |
| ILMN_1668822 | BATF      | 1.39E-04 | 0.46  |
| ILMN_1779147 | ENC1      | 1.39E-04 | -0.47 |
| ILMN_1689371 | GIMAP2    | 1.39E-04 | -0.46 |
| ILMN_2407824 | ATP1B1    | 1.40E-04 | 0.63  |
| ILMN_1714170 | SPSB1     | 1.40E-04 | 0.42  |
| ILMN_2401779 | FAM102A   | 1.43E-04 | 0.41  |
| ILMN_1735367 | HSD17B11  | 1.44E-04 | -0.61 |
| ILMN_1816244 |           | 1.44E-04 | 0.43  |
| ILMN_2088124 | TMEM154   | 1.44E-04 | -0.36 |
| ILMN_1727466 | KCNMB4    | 1.44E-04 | -0.39 |
| ILMN_1803811 | TRIB1     | 1.44E-04 | 0.49  |
| ILMN_1700067 | BTN3A2    | 1.44E-04 | -0.37 |
| ILMN_1666924 | PINK1     | 1.45E-04 | -0.54 |
| ILMN_1677441 | C20orf123 | 1.45E-04 | 1.11  |
| ILMN_1651826 | BASP1     | 1.45E-04 | -0.47 |
| ILMN_1802708 | BTN3A1    | 1.46E-04 | -0.41 |
| ILMN_1678517 | ACSL5     | 1.47E-04 | 0.17  |
| ILMN_1713751 | ADAM19    | 1.47E-04 | 0.93  |
| ILMN_1835092 |           | 1.48E-04 | -0.34 |
| ILMN_1663866 | TGFBI     | 1.48E-04 | 0.45  |
| ILMN_1676480 | LOC654053 | 1.48E-04 | -0.69 |
| ILMN_2407529 | RNF135    | 1.48E-04 | -0.39 |
| ILMN_1692546 | VNN2      | 1.48E-04 | -0.23 |
| ILMN_2239754 | IFIT3     | 1.49E-04 | -0.59 |

|              |              |          |       |
|--------------|--------------|----------|-------|
| ILMN_1791726 | TUBB3        | 1.49E-04 | 0.39  |
| ILMN_2066020 | TCEB1        | 1.49E-04 | 0.53  |
| ILMN_2214997 | LRRFIP1      | 1.49E-04 | 0.57  |
| ILMN_1785005 | NCF4         | 1.50E-04 | -0.48 |
| ILMN_2188722 | GLS          | 1.51E-04 | 0.48  |
| ILMN_1695640 | PTPN22       | 1.51E-04 | -0.45 |
| ILMN_1736863 | TMEM140      | 1.51E-04 | -0.52 |
| ILMN_1807206 | DHRS1        | 1.51E-04 | -0.50 |
| ILMN_1797021 | TMEM86A      | 1.53E-04 | -0.48 |
| ILMN_2187830 | CCNH         | 1.54E-04 | 0.62  |
| ILMN_1731157 | MYOZ1        | 1.54E-04 | 0.39  |
| ILMN_1795429 | VCL          | 1.55E-04 | 0.49  |
| ILMN_1741422 | FUT8         | 1.55E-04 | -0.29 |
| ILMN_1667711 | HRASLS3      | 1.56E-04 | -0.46 |
| ILMN_1782110 | ZNF295       | 1.57E-04 | 0.40  |
| ILMN_1678494 | ZNF438       | 1.57E-04 | -0.47 |
| ILMN_3235964 | HSPA7        | 1.59E-04 | -0.37 |
| ILMN_2355665 | MTP18        | 1.60E-04 | 0.49  |
| ILMN_1798373 | ITPRIPL1     | 1.60E-04 | 0.19  |
| ILMN_2101526 | GGCT         | 1.60E-04 | 0.47  |
| ILMN_1696601 | VAR5         | 1.61E-04 | 0.43  |
| ILMN_1751851 | CECR1        | 1.61E-04 | -0.51 |
| ILMN_2373062 | RHBDF2       | 1.61E-04 | -0.55 |
| ILMN_2396020 | DUSP6        | 1.62E-04 | -0.64 |
| ILMN_1751941 | LOC728772    | 1.62E-04 | 0.53  |
| ILMN_2394305 | PDGFB        | 1.63E-04 | 0.29  |
| ILMN_2183409 | SCARB1       | 1.64E-04 | 0.47  |
| ILMN_2197365 | RGS2         | 1.65E-04 | -1.14 |
| ILMN_1741594 | CLCN6        | 1.65E-04 | -0.31 |
| ILMN_1677305 | PVR          | 1.66E-04 | 0.42  |
| ILMN_1727348 | NMD3         | 1.66E-04 | 0.58  |
| ILMN_1669215 | SRPK2        | 1.66E-04 | 0.29  |
| ILMN_1814305 | SAMD9        | 1.66E-04 | -0.54 |
| ILMN_1723035 | OLR1         | 1.66E-04 | -0.57 |
| ILMN_1781174 | KIAA1009     | 1.66E-04 | -0.39 |
| ILMN_3234615 | LOC728650    | 1.66E-04 | -0.53 |
| ILMN_1671557 | PHLDA2       | 1.67E-04 | 0.24  |
| ILMN_2391900 | SLC26A6      | 1.69E-04 | 0.32  |
| ILMN_2316386 | GPBAR1       | 1.71E-04 | -0.82 |
| ILMN_1780898 | PRKCH        | 1.72E-04 | -0.55 |
| ILMN_1671478 | CKB          | 1.72E-04 | 0.75  |
| ILMN_2354140 | NAT5         | 1.74E-04 | 0.50  |
| ILMN_1740572 | TCN2         | 1.74E-04 | -0.35 |
| ILMN_3295874 | LOC100132805 | 1.74E-04 | 0.35  |
| ILMN_3238058 | LOC151162    | 1.75E-04 | 0.47  |
| ILMN_1728581 | C3orf18      | 1.76E-04 | 0.28  |

|              |              |          |       |
|--------------|--------------|----------|-------|
| ILMN_2214678 | MXD1         | 1.76E-04 | -0.65 |
| ILMN_1721457 | RANBP1       | 1.76E-04 | 0.40  |
| ILMN_1673711 | HSP90AB1     | 1.77E-04 | 0.50  |
| ILMN_1691476 | MYLK         | 1.77E-04 | -0.25 |
| ILMN_2115340 | HIST2H4A     | 1.78E-04 | -0.37 |
| ILMN_1714433 | MARCKSL1     | 1.78E-04 | 0.61  |
| ILMN_2319952 | VDR          | 1.79E-04 | 0.37  |
| ILMN_1700695 | SLC44A1      | 1.79E-04 | -0.50 |
| ILMN_1659895 | MSN          | 1.79E-04 | 0.48  |
| ILMN_2082324 | SLC36A4      | 1.79E-04 | -0.36 |
| ILMN_3236481 | LOC100129086 | 1.79E-04 | 0.44  |
| ILMN_1695316 | SLC39A8      | 1.79E-04 | -0.57 |
| ILMN_1694177 | PCNA         | 1.80E-04 | -0.46 |
| ILMN_1682799 | STAMBPL1     | 1.80E-04 | 0.52  |
| ILMN_1712082 | GCNT3        | 1.81E-04 | 0.25  |
| ILMN_1757278 | LOC643300    | 1.81E-04 | 0.28  |
| ILMN_1715718 | ZNF784       | 1.81E-04 | -0.33 |
| ILMN_1796130 | LOC221710    | 1.81E-04 | 0.40  |
| ILMN_1666364 | COQ10A       | 1.83E-04 | -0.34 |
| ILMN_1663685 | DGCR6        | 1.83E-04 | -0.48 |
| ILMN_2077905 | PTGFRN       | 1.83E-04 | 0.34  |
| ILMN_1665736 | LOC648024    | 1.83E-04 | 0.54  |
| ILMN_2170813 | LAMP3        | 1.84E-04 | 0.66  |
| ILMN_1811367 | MAT2B        | 1.84E-04 | 0.47  |
| ILMN_1735461 | DDX21        | 1.84E-04 | 0.59  |
| ILMN_1692199 | RNF103       | 1.85E-04 | -0.44 |
| ILMN_2070072 | RPS7         | 1.87E-04 | 0.33  |
| ILMN_1673936 | KHSRP        | 1.87E-04 | 0.41  |
| ILMN_3275771 | LOC642567    | 1.87E-04 | -0.57 |
| ILMN_1766169 | BCAT1        | 1.89E-04 | -0.53 |
| ILMN_1798181 | IRF7         | 1.89E-04 | -0.45 |
| ILMN_1696956 | ARID3B       | 1.89E-04 | -0.37 |
| ILMN_2389155 | UGP2         | 1.89E-04 | 0.59  |
| ILMN_1704785 | C10orf125    | 1.89E-04 | 0.38  |
| ILMN_1662334 | DNAJA3       | 1.89E-04 | 0.40  |
| ILMN_2274180 | MKKS         | 1.90E-04 | 0.39  |
| ILMN_1705247 | ACSL5        | 1.93E-04 | 0.59  |
| ILMN_1815205 | LYZ          | 1.94E-04 | -0.46 |
| ILMN_1652906 | GBGT1        | 1.94E-04 | -0.49 |
| ILMN_1663447 | HNRNPA1      | 1.94E-04 | 0.24  |
| ILMN_2058795 | PGCP         | 1.97E-04 | -0.40 |
| ILMN_1737298 | MAT2A        | 1.98E-04 | 0.51  |
| ILMN_1811972 | MYCBP2       | 1.99E-04 | -0.35 |
| ILMN_1780397 | TRAF3IP3     | 2.00E-04 | -0.28 |
| ILMN_1673030 | CMKLR1       | 2.02E-04 | -0.36 |
| ILMN_3231621 | LOC730235    | 2.03E-04 | -0.33 |

|              |            |          |       |
|--------------|------------|----------|-------|
| ILMN_1813120 | MAP4K3     | 2.04E-04 | 0.37  |
| ILMN_1748883 | CDKN2D     | 2.05E-04 | -0.29 |
| ILMN_1800602 | GCA        | 2.05E-04 | -0.47 |
| ILMN_1811104 | KTELC1     | 2.06E-04 | 0.59  |
| ILMN_1681703 | FOXO3      | 2.07E-04 | -0.55 |
| ILMN_2241953 | PILRA      | 2.07E-04 | -0.55 |
| ILMN_2235283 | MAPK1      | 2.07E-04 | 0.56  |
| ILMN_2043816 | ARPC5L     | 2.07E-04 | 0.44  |
| ILMN_1659960 | IL4I1      | 2.07E-04 | 0.43  |
| ILMN_3242900 | HIST2H2AA4 | 2.07E-04 | -0.51 |
| ILMN_1786473 | FOXD4      | 2.08E-04 | 0.36  |
| ILMN_1776519 | RAP1GAP    | 2.09E-04 | 0.99  |
| ILMN_1735038 | 42066      | 2.10E-04 | 0.27  |
| ILMN_2148847 | AKIRIN2    | 2.10E-04 | 0.57  |
| ILMN_1784985 | PRRT3      | 2.14E-04 | 0.48  |
| ILMN_1759344 | LOC652226  | 2.14E-04 | -0.21 |
| ILMN_1756071 | MFGE8      | 2.16E-04 | -0.45 |
| ILMN_1796755 | ITGB5      | 2.17E-04 | -0.52 |
| ILMN_1785324 | MTHFD1     | 2.17E-04 | 0.33  |
| ILMN_3177285 | HNRNPR     | 2.17E-04 | 0.44  |
| ILMN_2313821 | AIFM1      | 2.17E-04 | 0.52  |
| ILMN_1705848 | FAM104B    | 2.18E-04 | -0.44 |
| ILMN_1707464 | MST1       | 2.19E-04 | -0.32 |
| ILMN_1762594 | NOD2       | 2.22E-04 | -0.42 |
| ILMN_2401253 | FAM13A     | 2.24E-04 | -0.29 |
| ILMN_1717934 | SYT11      | 2.25E-04 | -0.55 |
| ILMN_1803779 | AP2A2      | 2.29E-04 | 0.39  |
| ILMN_2134974 | RAB38      | 2.29E-04 | 0.40  |
| ILMN_2342033 | F11R       | 2.29E-04 | -0.47 |
| ILMN_1724907 | NUDT3      | 2.29E-04 | -0.41 |
| ILMN_1813625 | TRIM25     | 2.29E-04 | -0.31 |
| ILMN_2404154 | SERPINA1   | 2.29E-04 | -0.58 |
| ILMN_2087646 | HLX        | 2.31E-04 | 0.47  |
| ILMN_1658071 | ATP1B1     | 2.33E-04 | 0.59  |
| ILMN_3238369 | JHDM1D     | 2.34E-04 | 0.35  |
| ILMN_2134538 | FTHL11     | 2.35E-04 | -0.42 |
| ILMN_2197846 | HADHB      | 2.35E-04 | 0.52  |
| ILMN_2124221 | CLLU1OS    | 2.35E-04 | -0.76 |
| ILMN_1690921 | STAT2      | 2.35E-04 | -0.58 |
| ILMN_2337263 | PKIB       | 2.35E-04 | 0.35  |
| ILMN_1803376 | AEBP2      | 2.37E-04 | 0.31  |
| ILMN_1769433 | IQGAP2     | 2.39E-04 | -0.39 |
| ILMN_1792922 | SOD2       | 2.39E-04 | -0.36 |
| ILMN_1803906 | ETV2       | 2.40E-04 | -0.30 |
| ILMN_1744937 | PTPRM      | 2.41E-04 | -0.33 |
| ILMN_1745075 | RPLP0      | 2.41E-04 | 0.39  |

|              |           |          |       |
|--------------|-----------|----------|-------|
| ILMN_1673518 | BRWD1     | 2.41E-04 | 0.40  |
| ILMN_1772359 | LPTM5     | 2.42E-04 | -0.44 |
| ILMN_2343010 | BOLA3     | 2.43E-04 | 0.48  |
| ILMN_1682404 | SETMAR    | 2.47E-04 | 0.39  |
| ILMN_1674394 | C20orf3   | 2.50E-04 | -0.49 |
| ILMN_1677466 | DUSP6     | 2.50E-04 | -0.34 |
| ILMN_1759326 | P2RX7     | 2.51E-04 | -0.51 |
| ILMN_1716563 | PRKCB1    | 2.54E-04 | -0.27 |
| ILMN_2144088 | FDFT1     | 2.54E-04 | -0.49 |
| ILMN_2341595 | KITLG     | 2.54E-04 | -0.46 |
| ILMN_1692168 | UBE2Z     | 2.55E-04 | 0.44  |
| ILMN_2184064 | ARRDC4    | 2.56E-04 | 0.64  |
| ILMN_3210946 | LOC645969 | 2.56E-04 | 0.50  |
| ILMN_1799106 | MOSC1     | 2.58E-04 | -0.43 |
| ILMN_2387505 | AP1B1     | 2.58E-04 | 0.28  |
| ILMN_1794017 | SERTAD1   | 2.60E-04 | 0.44  |
| ILMN_1760011 | GTF2IRD2B | 2.60E-04 | -0.27 |
| ILMN_1674236 | HSPB1     | 2.64E-04 | 0.46  |
| ILMN_2364062 | THOC4     | 2.65E-04 | 0.42  |
| ILMN_1671843 | PSRC1     | 2.65E-04 | -0.27 |
| ILMN_1655577 | TIAM1     | 2.68E-04 | 0.44  |
| ILMN_1776788 | C5orf41   | 2.68E-04 | -0.52 |
| ILMN_2082314 | TOM1      | 2.68E-04 | -0.45 |
| ILMN_1683598 | ACSL4     | 2.68E-04 | -0.49 |
| ILMN_2231911 | AUH       | 2.69E-04 | 0.46  |
| ILMN_1662340 | ZNF358    | 2.69E-04 | -0.43 |
| ILMN_1654518 | LRCH4     | 2.69E-04 | -0.42 |
| ILMN_1809866 | WDR74     | 2.70E-04 | 0.33  |
| ILMN_2335704 | NCF4      | 2.70E-04 | -0.42 |
| ILMN_2312194 | CYB5A     | 2.70E-04 | -0.63 |
| ILMN_2214355 | RAB30     | 2.71E-04 | 0.29  |
| ILMN_1786357 | CENTD2    | 2.71E-04 | -0.37 |
| ILMN_1807277 | IFI30     | 2.71E-04 | -0.44 |
| ILMN_1691578 | GTF3C6    | 2.71E-04 | 0.48  |
| ILMN_1748591 | ODC1      | 2.72E-04 | 0.53  |
| ILMN_1778709 | PICALM    | 2.74E-04 | 0.39  |
| ILMN_1781388 | PGM5      | 2.74E-04 | -0.41 |
| ILMN_3245688 | DGCR6L    | 2.74E-04 | -0.44 |
| ILMN_2157951 | STX6      | 2.75E-04 | -0.46 |
| ILMN_1712751 | HADHA     | 2.75E-04 | 0.39  |
| ILMN_1789505 | ITPR1     | 2.77E-04 | -0.47 |
| ILMN_2214197 | TP53INP1  | 2.78E-04 | -0.42 |
| ILMN_1668408 | AIFM1     | 2.78E-04 | 0.44  |
| ILMN_1691402 | LOC644162 | 2.79E-04 | 0.51  |
| ILMN_2112357 | CD300LF   | 2.79E-04 | -0.65 |
| ILMN_1733270 | CD163     | 2.80E-04 | -0.67 |

|              |           |          |       |
|--------------|-----------|----------|-------|
| ILMN_1652065 | KCNMB1    | 2.80E-04 | -0.44 |
| ILMN_1805448 | EPB41L2   | 2.80E-04 | 0.42  |
| ILMN_1721128 | TOMM34    | 2.82E-04 | 0.44  |
| ILMN_1676528 | BTN3A2    | 2.82E-04 | -0.38 |
| ILMN_1742167 | TUBA1C    | 2.82E-04 | 0.60  |
| ILMN_1679476 | GART      | 2.83E-04 | 0.45  |
| ILMN_1735432 | ISCU      | 2.83E-04 | -0.44 |
| ILMN_2384241 | TGFBR2    | 2.83E-04 | -0.48 |
| ILMN_2062620 | NMT2      | 2.84E-04 | -0.23 |
| ILMN_1737025 | PLCL2     | 2.84E-04 | -0.43 |
| ILMN_2395856 | TMEM218   | 2.87E-04 | -0.40 |
| ILMN_1683023 | PDGFC     | 2.88E-04 | 0.48  |
| ILMN_2073758 | MMP12     | 2.89E-04 | 0.65  |
| ILMN_2115005 | FGD2      | 2.93E-04 | 0.66  |
| ILMN_1769694 | ACCN2     | 2.93E-04 | -0.53 |
| ILMN_1755138 | NEK8      | 2.97E-04 | -0.26 |
| ILMN_1793517 | RASAL1    | 3.04E-04 | 0.44  |
| ILMN_2379967 | FCAR      | 3.04E-04 | -0.35 |
| ILMN_2042771 | PTTG1     | 3.04E-04 | -0.39 |
| ILMN_2140990 | CAMK1     | 3.07E-04 | 0.64  |
| ILMN_1681890 | DYNLT3    | 3.09E-04 | -0.41 |
| ILMN_1737406 | KLF6      | 3.12E-04 | 0.44  |
| ILMN_2294762 | AMY1A     | 3.13E-04 | 0.56  |
| ILMN_2199768 | SLITRK4   | 3.13E-04 | -0.42 |
| ILMN_2375484 | CPEB2     | 3.14E-04 | 0.34  |
| ILMN_1679800 | BRIX1     | 3.14E-04 | 0.42  |
| ILMN_1723020 | MAP3K1    | 3.14E-04 | -0.55 |
| ILMN_1752899 | BCL11A    | 3.15E-04 | -0.42 |
| ILMN_3228585 | LOC728661 | 3.17E-04 | -0.40 |
| ILMN_1815086 | NINJ1     | 3.17E-04 | -0.55 |
| ILMN_1705144 | ULK1      | 3.20E-04 | -0.51 |
| ILMN_3227994 | LOC729992 | 3.20E-04 | 0.39  |
| ILMN_1704398 | FZD9      | 3.23E-04 | -0.40 |
| ILMN_3212373 | LOC727803 | 3.23E-04 | 0.39  |
| ILMN_2338997 | PTP4A2    | 3.23E-04 | -0.45 |
| ILMN_1745686 | MFHAS1    | 3.23E-04 | 0.36  |
| ILMN_1764850 | HPCAL1    | 3.24E-04 | 0.42  |
| ILMN_1672589 | SEMA4B    | 3.24E-04 | -0.38 |
| ILMN_1750273 | RPL23AP7  | 3.24E-04 | -0.32 |
| ILMN_2369018 | EVI2A     | 3.25E-04 | -0.50 |
| ILMN_2370882 | ACSL5     | 3.25E-04 | 0.30  |
| ILMN_1751120 | HIST1H4H  | 3.32E-04 | -0.45 |
| ILMN_3251132 | TMOD2     | 3.35E-04 | -0.18 |
| ILMN_3235514 | GPR183    | 3.36E-04 | 0.39  |
| ILMN_1712236 | PPP1R3B   | 3.36E-04 | 0.19  |
| ILMN_1702501 | RPS6KA2   | 3.39E-04 | -0.48 |

|              |              |          |       |
|--------------|--------------|----------|-------|
| ILMN_1757882 | PPP1R16A     | 3.40E-04 | 0.35  |
| ILMN_1656628 | WDR4         | 3.40E-04 | 0.34  |
| ILMN_2224103 | PAPSS1       | 3.40E-04 | -0.44 |
| ILMN_2400644 | SRGAP3       | 3.41E-04 | -0.24 |
| ILMN_1702858 | ADHFE1       | 3.41E-04 | -0.31 |
| ILMN_2112256 | TNFRSF4      | 3.45E-04 | 0.40  |
| ILMN_1753719 | GTF2A2       | 3.47E-04 | 0.45  |
| ILMN_1715214 | PTPN7        | 3.48E-04 | 0.52  |
| ILMN_3178258 | FABP5L2      | 3.50E-04 | 0.64  |
| ILMN_1714809 | RPIA         | 3.50E-04 | 0.60  |
| ILMN_1700380 | ATP6V0A2     | 3.51E-04 | 0.43  |
| ILMN_1771026 | GARS         | 3.55E-04 | 0.62  |
| ILMN_1777342 | PREX1        | 3.55E-04 | -0.34 |
| ILMN_1742544 | MEF2C        | 3.55E-04 | -0.44 |
| ILMN_1660661 | TCP1         | 3.55E-04 | 0.36  |
| ILMN_2278729 | EIF3B        | 3.56E-04 | 0.23  |
| ILMN_1738449 | STIM2        | 3.56E-04 | 0.29  |
| ILMN_2330267 | ABCE1        | 3.57E-04 | 0.44  |
| ILMN_2374340 | PLAUR        | 3.57E-04 | -0.65 |
| ILMN_3265343 | LOC100130633 | 3.58E-04 | -0.42 |
| ILMN_1774077 | GBP2         | 3.58E-04 | -0.48 |
| ILMN_1758895 | CTSK         | 3.60E-04 | -0.51 |
| ILMN_1739050 | PIPOX        | 3.60E-04 | -0.19 |
| ILMN_1762582 | ARNT         | 3.61E-04 | -0.21 |
| ILMN_3239937 | NUDT16P      | 3.62E-04 | 0.33  |
| ILMN_1677432 | SRGAP1       | 3.62E-04 | 0.24  |
| ILMN_1723158 | NOP2         | 3.62E-04 | 0.49  |
| ILMN_1692742 | DENND3       | 3.67E-04 | -0.26 |
| ILMN_2363058 | PAOX         | 3.69E-04 | 0.33  |
| ILMN_2085236 | SNX24        | 3.69E-04 | -0.31 |
| ILMN_1811592 | ARHGAP21     | 3.69E-04 | -0.54 |
| ILMN_3206343 | LOC644914    | 3.69E-04 | -0.50 |
| ILMN_2380237 | C1QTNF1      | 3.70E-04 | 0.43  |
| ILMN_1791396 | DGCR6        | 3.71E-04 | -0.49 |
| ILMN_1797009 | F3           | 3.72E-04 | 0.39  |
| ILMN_1784005 | LOC644615    | 3.74E-04 | -0.47 |
| ILMN_2148913 | TMEM45A      | 3.78E-04 | -0.27 |
| ILMN_1716019 | RHBDL3       | 3.78E-04 | 0.32  |
| ILMN_1703891 | TBC1D9       | 3.78E-04 | -0.48 |
| ILMN_1801710 | APBB1IP      | 3.80E-04 | 0.43  |
| ILMN_1695276 | MAPRE2       | 3.85E-04 | -0.40 |
| ILMN_3241758 | POTEF        | 3.86E-04 | 0.40  |
| ILMN_1781812 | NR4A3        | 3.87E-04 | 0.45  |
| ILMN_2166972 | BBS12        | 3.88E-04 | -0.21 |
| ILMN_1716093 | KRT10        | 3.88E-04 | -0.37 |
| ILMN_3202568 | LOC643768    | 3.94E-04 | -0.20 |

|              |           |          |       |
|--------------|-----------|----------|-------|
| ILMN_1654370 | TESK2     | 3.95E-04 | -0.24 |
| ILMN_2280548 | FYB       | 3.95E-04 | -0.22 |
| ILMN_2170814 | LAMP3     | 3.95E-04 | 0.88  |
| ILMN_1715969 | SLC25A37  | 3.96E-04 | -0.21 |
| ILMN_1691927 | BTBD1     | 3.96E-04 | 0.44  |
| ILMN_1815519 | EPN2      | 3.97E-04 | 0.24  |
| ILMN_1728048 | LOC158160 | 3.97E-04 | -0.34 |
| ILMN_1801043 | GSN       | 4.00E-04 | 0.58  |
| ILMN_1774779 | LOC647121 | 4.00E-04 | 0.21  |
| ILMN_1732452 | MAPKAPK3  | 4.01E-04 | 0.42  |
| ILMN_1665738 | FLI1      | 4.02E-04 | -0.45 |
| ILMN_1701032 | TFPI      | 4.04E-04 | -0.22 |
| ILMN_1735157 | GALNT12   | 4.05E-04 | 0.88  |
| ILMN_1725675 | ABCC6     | 4.07E-04 | -0.20 |
| ILMN_1811702 | GRN       | 4.07E-04 | -0.41 |
| ILMN_2335718 | HNRNPAB   | 4.07E-04 | 0.40  |
| ILMN_1769671 | RYK       | 4.07E-04 | 0.46  |
| ILMN_1798270 | C11orf75  | 4.07E-04 | -0.45 |
| ILMN_1810191 | PLA2G4C   | 4.07E-04 | -0.48 |
| ILMN_3253728 | C19orf64  | 4.10E-04 | 0.34  |
| ILMN_1781155 | LYN       | 4.11E-04 | -0.43 |
| ILMN_1780601 | EMR1      | 4.18E-04 | -0.38 |
| ILMN_1674038 | CTSD      | 4.22E-04 | -0.51 |
| ILMN_1766125 | LONP1     | 4.22E-04 | 0.37  |
| ILMN_1747673 | RASL10A   | 4.24E-04 | 0.53  |
| ILMN_1665357 | EPS15     | 4.29E-04 | 0.37  |
| ILMN_2323992 | CLEC7A    | 4.32E-04 | 0.51  |
| ILMN_2053281 | C14orf149 | 4.36E-04 | 0.31  |
| ILMN_1664802 | WSB1      | 4.36E-04 | -0.38 |
| ILMN_1788810 | C12orf30  | 4.37E-04 | 0.31  |
| ILMN_1691980 | FAM126A   | 4.37E-04 | 0.15  |
| ILMN_1685415 | HBP1      | 4.38E-04 | -0.44 |
| ILMN_1715684 | LAMB3     | 4.39E-04 | -0.27 |
| ILMN_1786722 | ZNF385A   | 4.39E-04 | -0.37 |
| ILMN_1661346 | LOC648210 | 4.46E-04 | 0.40  |
| ILMN_2392569 | FPR2      | 4.46E-04 | -0.51 |
| ILMN_2053103 | SLC40A1   | 4.49E-04 | -0.71 |
| ILMN_1779828 | EDEM1     | 4.49E-04 | 0.43  |
| ILMN_1751161 | COL7A1    | 4.51E-04 | 0.35  |
| ILMN_3240838 | SLC25A6   | 4.53E-04 | 0.43  |
| ILMN_3251728 | MTMR10    | 4.54E-04 | 0.38  |
| ILMN_1733927 | TCEB2     | 4.54E-04 | -0.45 |
| ILMN_1693882 | TAPT1     | 4.56E-04 | 0.45  |
| ILMN_1659206 | RARA      | 4.57E-04 | 0.43  |
| ILMN_1663751 | CYCSL1    | 4.57E-04 | 0.54  |
| ILMN_2367782 | STARD7    | 4.58E-04 | 0.41  |



|              |               |          |       |
|--------------|---------------|----------|-------|
| ILMN_1674574 | VNN1          | 4.58E-04 | -0.33 |
| ILMN_1787815 | TRIB3         | 4.59E-04 | 1.06  |
| ILMN_1746819 | C5            | 4.60E-04 | -0.39 |
| ILMN_2216838 | DKFZP586I1420 | 4.60E-04 | -0.27 |
| ILMN_1737163 | SH3BGRL3      | 4.60E-04 | 0.46  |
| ILMN_2387952 | FAM134B       | 4.60E-04 | -0.40 |
| ILMN_1716797 | CD302         | 4.61E-04 | -0.43 |
| ILMN_1794190 | CCPG1         | 4.63E-04 | -0.42 |
| ILMN_1752199 | LHPP          | 4.63E-04 | -0.40 |
| ILMN_3236821 | HSPBL2        | 4.65E-04 | 0.41  |
| ILMN_3251629 | EIF4A1        | 4.66E-04 | 0.42  |
| ILMN_1771695 | RCBTB2        | 4.68E-04 | -0.38 |
| ILMN_1691507 | IL8RBP        | 4.69E-04 | 0.25  |
| ILMN_1879326 |               | 4.70E-04 | 0.30  |
| ILMN_1789781 | PIM3          | 4.70E-04 | 0.21  |
| ILMN_1654612 | ZNF589        | 4.71E-04 | -0.36 |
| ILMN_2230035 | BBS2          | 4.71E-04 | -0.38 |
| ILMN_1729294 | RNF130        | 4.71E-04 | -0.43 |
| ILMN_1678490 | RILPL2        | 4.71E-04 | -0.45 |
| ILMN_2157099 | CCNA1         | 4.71E-04 | 0.52  |
| ILMN_1765557 | OLFML2B       | 4.72E-04 | -0.56 |
| ILMN_1798533 | ZNF22         | 4.72E-04 | -0.34 |
| ILMN_1668312 | SLC2A9        | 4.72E-04 | -0.40 |
| ILMN_1733324 | ITGB3         | 4.78E-04 | 0.30  |
| ILMN_2038777 | ACTB          | 4.78E-04 | 0.44  |
| ILMN_1674063 | OAS2          | 4.78E-04 | -0.43 |
| ILMN_1792473 | AIF1          | 4.80E-04 | -0.66 |
| ILMN_1680925 | SLC9A3R1      | 4.81E-04 | -0.33 |
| ILMN_1689655 | HLA-DRA       | 4.81E-04 | 0.55  |
| ILMN_2106449 | PLEKHF2       | 4.82E-04 | 0.34  |
| ILMN_1701911 | C5orf20       | 4.82E-04 | 0.46  |
| ILMN_1675386 | CES1          | 4.86E-04 | -0.37 |
| ILMN_1725175 | FOSL2         | 4.88E-04 | 0.28  |
| ILMN_1743104 | RBM4B         | 4.88E-04 | -0.33 |
| ILMN_2129572 | F3            | 4.88E-04 | 0.79  |
| ILMN_1781752 | CLEC16A       | 4.88E-04 | 0.38  |
| ILMN_1675117 | HSD17B11      | 4.88E-04 | -0.46 |
| ILMN_1752923 | IFNAR1        | 4.89E-04 | -0.45 |
| ILMN_2254635 | ITGAX         | 5.00E-04 | 0.47  |
| ILMN_3266606 | FABP5L2       | 5.00E-04 | 0.51  |
| ILMN_1718558 | PARP12        | 5.00E-04 | 0.43  |
| ILMN_1812926 | ANTXR2        | 5.02E-04 | -0.38 |
| ILMN_3299365 | LOC729406     | 5.06E-04 | 0.33  |
| ILMN_2182148 | C2orf32       | 5.07E-04 | -0.32 |
| ILMN_2405297 | NOTCH2        | 5.07E-04 | -0.33 |
| ILMN_1726306 | HMBS          | 5.07E-04 | 0.35  |

|              |            |          |       |
|--------------|------------|----------|-------|
| ILMN_1805662 | FBXW5      | 5.07E-04 | -0.45 |
| ILMN_1713759 | UBE2J1     | 5.08E-04 | 0.43  |
| ILMN_1798061 | ZFYVE26    | 5.08E-04 | -0.42 |
| ILMN_1677607 | SC5DL      | 5.11E-04 | -0.47 |
| ILMN_1745242 | PLSCR1     | 5.12E-04 | -0.44 |
| ILMN_3219455 | LOC644745  | 5.13E-04 | 0.40  |
| ILMN_2056479 | TXNL2      | 5.13E-04 | 0.50  |
| ILMN_1708203 | OTUD4      | 5.13E-04 | 0.33  |
| ILMN_2383349 | STEAP3     | 5.14E-04 | -0.45 |
| ILMN_1777765 | C12orf10   | 5.15E-04 | 0.44  |
| ILMN_1800626 | SESN1      | 5.15E-04 | -0.34 |
| ILMN_2165993 | ITLN1      | 5.17E-04 | -0.13 |
| ILMN_2311166 | ITGB5      | 5.20E-04 | -0.44 |
| ILMN_1687508 | ALDH7A1    | 5.20E-04 | -0.46 |
| ILMN_3224856 | LOC729660  | 5.28E-04 | -0.31 |
| ILMN_1654639 | HERC6      | 5.28E-04 | -0.34 |
| ILMN_1724941 | CDCP1      | 5.30E-04 | 0.27  |
| ILMN_1674609 | CLTB       | 5.30E-04 | 0.38  |
| ILMN_1726327 | AMY1B      | 5.31E-04 | 0.37  |
| ILMN_1717262 | PROCR      | 5.32E-04 | -0.42 |
| ILMN_1740604 | RAB11FIP5  | 5.35E-04 | -0.23 |
| ILMN_1688997 | C17orf58   | 5.35E-04 | 0.21  |
| ILMN_1652223 | WDR91      | 5.35E-04 | -0.44 |
| ILMN_1799208 | CSGALNACT2 | 5.37E-04 | 0.33  |
| ILMN_1672124 | C4orf18    | 5.37E-04 | -0.54 |
| ILMN_1664265 | EPHA1      | 5.37E-04 | -0.26 |
| ILMN_1728639 | FCGR3B     | 5.40E-04 | -0.29 |
| ILMN_1701621 | SCO2       | 5.40E-04 | -0.39 |
| ILMN_1805377 | ZP3        | 5.41E-04 | -0.37 |
| ILMN_1787251 | DAAM1      | 5.43E-04 | 0.44  |
| ILMN_1663313 | AMY1C      | 5.45E-04 | 0.50  |
| ILMN_1752281 | DNAJC13    | 5.47E-04 | -0.35 |
| ILMN_1760667 | POLR3GL    | 5.50E-04 | -0.40 |
| ILMN_2153280 | KIAA0090   | 5.50E-04 | 0.31  |
| ILMN_1715583 | BOP1       | 5.52E-04 | 0.35  |
| ILMN_1915076 |            | 5.52E-04 | -0.38 |
| ILMN_1682264 | DCAF7      | 5.54E-04 | 0.38  |
| ILMN_1683678 | SPATS2L    | 5.54E-04 | 0.39  |
| ILMN_2366192 | FGL1       | 5.55E-04 | 0.16  |
| ILMN_2308338 | BMF        | 5.55E-04 | -0.29 |
| ILMN_1704305 | NIP7       | 5.56E-04 | 0.37  |
| ILMN_1780842 | RANBP6     | 5.56E-04 | 0.41  |
| ILMN_2211780 | SLC25A4    | 5.57E-04 | 0.36  |
| ILMN_1749403 | TSPAN33    | 5.57E-04 | 0.52  |
| ILMN_2096083 | PLEKHA5    | 5.57E-04 | 0.38  |
| ILMN_1800935 | ARV1       | 5.58E-04 | 0.44  |

|              |              |          |       |
|--------------|--------------|----------|-------|
| ILMN_1767612 | BBS2         | 5.60E-04 | -0.41 |
| ILMN_1809894 | TMEM117      | 5.62E-04 | 0.27  |
| ILMN_2379599 | CD163        | 5.64E-04 | -0.63 |
| ILMN_1726786 | TNRC6B       | 5.66E-04 | -0.44 |
| ILMN_1735052 | ULK1         | 5.66E-04 | -0.50 |
| ILMN_1676846 | ABCE1        | 5.67E-04 | 0.37  |
| ILMN_1720048 | CCL2         | 5.69E-04 | -0.62 |
| ILMN_1659888 | PPP1R14B     | 5.70E-04 | 0.37  |
| ILMN_2351930 | TRIM33       | 5.70E-04 | -0.37 |
| ILMN_3252556 | CARD16       | 5.70E-04 | -0.20 |
| ILMN_2337336 | PVRL2        | 5.73E-04 | 0.28  |
| ILMN_1736704 | DIXDC1       | 5.73E-04 | -0.21 |
| ILMN_3233930 | LOC390557    | 5.73E-04 | 0.41  |
| ILMN_1745005 | GGCT         | 5.74E-04 | 0.36  |
| ILMN_1798172 | IPO4         | 5.77E-04 | 0.18  |
| ILMN_1909886 |              | 5.81E-04 | -0.33 |
| ILMN_3207933 | LOC647150    | 5.81E-04 | 0.45  |
| ILMN_2307903 | VCAM1        | 5.83E-04 | 0.45  |
| ILMN_1652082 | ELF4         | 5.83E-04 | 0.45  |
| ILMN_3242459 | DCTPP1       | 5.83E-04 | 0.43  |
| ILMN_1710622 | DUOXA1       | 5.83E-04 | 0.48  |
| ILMN_1712389 | CKLF         | 5.83E-04 | 0.43  |
| ILMN_3283680 | LOC345041    | 5.84E-04 | 0.48  |
| ILMN_3243366 | C2orf55      | 5.87E-04 | -0.34 |
| ILMN_1696407 | SFRS2        | 5.87E-04 | 0.43  |
| ILMN_2298365 | PPP2R2B      | 5.87E-04 | 0.44  |
| ILMN_2396444 | CD14         | 5.88E-04 | -0.56 |
| ILMN_1715068 | AQP9         | 5.90E-04 | 0.37  |
| ILMN_1748767 | LOC730740    | 5.91E-04 | -0.47 |
| ILMN_1752213 | TMEM60       | 5.92E-04 | -0.43 |
| ILMN_2156936 | SCCPDH       | 5.92E-04 | -0.29 |
| ILMN_1766916 | RPAP3        | 5.92E-04 | 0.37  |
| ILMN_1691436 | BLVRA        | 5.95E-04 | 0.40  |
| ILMN_1763461 | ALDH7A1      | 5.95E-04 | -0.43 |
| ILMN_2334296 | IL18BP       | 6.01E-04 | 0.42  |
| ILMN_2405521 | MTHFD2       | 6.03E-04 | 0.47  |
| ILMN_1723212 | SFRS3        | 6.05E-04 | 0.35  |
| ILMN_1796146 | EIF4E3       | 6.06E-04 | -0.28 |
| ILMN_1695991 | COLQ         | 6.07E-04 | -0.40 |
| ILMN_2359800 | MS4A6A       | 6.07E-04 | 0.66  |
| ILMN_2316844 | RBPJ         | 6.07E-04 | 0.19  |
| ILMN_1786105 | PCBD1        | 6.08E-04 | 0.37  |
| ILMN_1800951 | ATXN1        | 6.09E-04 | 0.51  |
| ILMN_3215206 | LOC100133836 | 6.13E-04 | 0.28  |
| ILMN_1690170 | CRABP2       | 6.16E-04 | 0.56  |
| ILMN_1656837 | RBP1         | 6.22E-04 | -0.45 |

|              |              |          |       |
|--------------|--------------|----------|-------|
| ILMN_3307940 | FLJ35776     | 6.23E-04 | -0.23 |
| ILMN_3244286 | TANC2        | 6.26E-04 | -0.27 |
| ILMN_1800838 | SPATA12      | 6.27E-04 | -0.25 |
| ILMN_1669094 | ZNF672       | 6.29E-04 | 0.34  |
| ILMN_3182768 | LOC100130520 | 6.32E-04 | 0.23  |
| ILMN_1889752 |              | 6.35E-04 | 0.31  |
| ILMN_2370872 | GRINA        | 6.37E-04 | -0.46 |
| ILMN_3249667 | LOC100133678 | 6.37E-04 | 0.51  |
| ILMN_1803398 | SRF          | 6.38E-04 | 0.38  |
| ILMN_1794782 | ABCG1        | 6.41E-04 | -0.53 |
| ILMN_1803850 | TSPAN15      | 6.42E-04 | 0.22  |
| ILMN_1752562 | CXCL5        | 6.43E-04 | -0.98 |
| ILMN_2363439 | RYK          | 6.48E-04 | 0.30  |
| ILMN_1761941 | C4orf18      | 6.49E-04 | -0.44 |
| ILMN_1807919 | TNS1         | 6.49E-04 | -0.29 |
| ILMN_1716596 | NSMAF        | 6.49E-04 | -0.46 |
| ILMN_1686152 | GGA2         | 6.50E-04 | -0.43 |
| ILMN_2055156 | PAG1         | 6.50E-04 | -0.30 |
| ILMN_1796409 | C1QB         | 6.50E-04 | 0.40  |
| ILMN_1671891 | PID1         | 6.50E-04 | -0.22 |
| ILMN_2365465 | XBP1         | 6.51E-04 | 0.49  |
| ILMN_1663399 | TIMP4        | 6.51E-04 | 0.39  |
| ILMN_1720235 | ADSSL1       | 6.52E-04 | -0.20 |
| ILMN_1754660 | ZCCHC24      | 6.52E-04 | -0.28 |
| ILMN_1730159 | TIFAB        | 6.52E-04 | 0.40  |
| ILMN_1660359 | LOC654126    | 6.52E-04 | 0.21  |
| ILMN_2342240 | MGAT2        | 6.52E-04 | 0.36  |
| ILMN_1667319 | LPPR2        | 6.52E-04 | -0.21 |
| ILMN_1743299 | PXMP3        | 6.52E-04 | -0.46 |
| ILMN_1656415 | CDKN2C       | 6.53E-04 | -0.14 |
| ILMN_1786041 | ASB9         | 6.55E-04 | -0.28 |
| ILMN_2325347 | B3GALNT1     | 6.57E-04 | 0.51  |
| ILMN_1721035 | MS4A6A       | 6.57E-04 | 0.70  |
| ILMN_3278070 | LOC100131336 | 6.59E-04 | 0.41  |
| ILMN_1782635 | YARS2        | 6.64E-04 | 0.39  |
| ILMN_2410262 | MTMR14       | 6.68E-04 | 0.40  |
| ILMN_1747630 | DEK          | 6.68E-04 | 0.39  |
| ILMN_1660549 | GPR177       | 6.69E-04 | -0.43 |
| ILMN_1720998 | CA12         | 6.71E-04 | -0.40 |
| ILMN_2070375 | GPR82        | 6.71E-04 | -0.30 |
| ILMN_1844692 | FOXO3        | 6.73E-04 | -0.49 |
| ILMN_1689842 | SC4MOL       | 6.76E-04 | -0.38 |
| ILMN_1703305 | TWF2         | 6.79E-04 | 0.47  |
| ILMN_2380588 | C6orf108     | 6.81E-04 | 0.43  |
| ILMN_3235221 | LOC644936    | 6.83E-04 | 0.58  |
| ILMN_2386008 | MPZL1        | 6.85E-04 | -0.33 |

|              |           |          |       |
|--------------|-----------|----------|-------|
| ILMN_1787595 | B3GALNT1  | 6.87E-04 | 0.29  |
| ILMN_2095660 | TMEM156   | 6.87E-04 | -0.35 |
| ILMN_2329914 | SPRY1     | 6.88E-04 | -0.42 |
| ILMN_1699631 | GATS      | 6.92E-04 | -0.20 |
| ILMN_1768973 | HIST2H2AC | 6.92E-04 | -0.42 |
| ILMN_1729915 | PILRA     | 6.93E-04 | -0.42 |
| ILMN_1798459 | PPAN      | 6.94E-04 | 0.21  |
| ILMN_1746378 | GHDC      | 6.95E-04 | -0.35 |
| ILMN_1659984 | MEP1A     | 6.95E-04 | -0.35 |
| ILMN_1728698 | GDE1      | 6.95E-04 | -0.36 |
| ILMN_1680856 | MAMLD1    | 6.96E-04 | -0.29 |
| ILMN_3225471 | LOC728650 | 6.96E-04 | -0.35 |
| ILMN_1733811 | JUP       | 6.97E-04 | -0.53 |
| ILMN_1679826 | CST7      | 6.97E-04 | 0.63  |
| ILMN_1703074 | CPD       | 7.03E-04 | -0.54 |
| ILMN_1707286 | FLJ22662  | 7.03E-04 | -0.41 |
| ILMN_1793724 | C3orf31   | 7.03E-04 | 0.33  |
| ILMN_1653871 | NAMPT     | 7.06E-04 | -0.38 |
| ILMN_2115011 | FGD2      | 7.18E-04 | 0.32  |
| ILMN_1742379 | IFT122    | 7.28E-04 | -0.41 |
| ILMN_2367165 | ABTB1     | 7.28E-04 | -0.21 |
| ILMN_2307740 | CD46      | 7.29E-04 | -0.43 |
| ILMN_1776905 | FAM23B    | 7.30E-04 | 0.31  |
| ILMN_1699585 | BHLHE22   | 7.32E-04 | 0.13  |
| ILMN_1810729 | UBL3      | 7.33E-04 | 0.43  |
| ILMN_3213568 | LOC402112 | 7.34E-04 | 0.39  |
| ILMN_3239060 | KRBA1     | 7.37E-04 | -0.34 |
| ILMN_1798957 | C12orf47  | 7.42E-04 | -0.43 |
| ILMN_1700081 | FST       | 7.42E-04 | 0.30  |
| ILMN_2220187 | GFPT1     | 7.46E-04 | 0.50  |
| ILMN_1775703 | TRAPPC6A  | 7.47E-04 | -0.39 |
| ILMN_1782095 | C20orf55  | 7.48E-04 | -0.33 |
| ILMN_1720083 | EHD4      | 7.48E-04 | 0.47  |
| ILMN_1672042 | DOLPP1    | 7.57E-04 | 0.29  |
| ILMN_1696302 | FABP5     | 7.57E-04 | 0.56  |
| ILMN_1708619 | SEH1L     | 7.59E-04 | 0.26  |
| ILMN_1651315 | HMG20B    | 7.59E-04 | 0.42  |
| ILMN_1739576 | CYB5R2    | 7.66E-04 | -0.44 |
| ILMN_1656920 | CRIP1     | 7.71E-04 | 0.57  |
| ILMN_1766405 | GOLM1     | 7.74E-04 | 0.27  |
| ILMN_1759513 | RND3      | 7.75E-04 | -0.40 |
| ILMN_1703408 | FZD3      | 7.80E-04 | 0.16  |
| ILMN_3307858 | STIM2     | 7.80E-04 | 0.32  |
| ILMN_2189993 | MRPS35    | 7.82E-04 | 0.41  |
| ILMN_1683146 | FTH1      | 7.82E-04 | -0.37 |
| ILMN_1705297 | MYBPH     | 7.82E-04 | -0.42 |

|              |              |          |       |
|--------------|--------------|----------|-------|
| ILMN_3215712 | LOC100131609 | 7.83E-04 | 0.55  |
| ILMN_3240316 | TMSL3        | 7.83E-04 | -0.37 |
| ILMN_1737705 | UHRF1BP1L    | 7.84E-04 | 0.32  |
| ILMN_1809695 | CAMK2G       | 7.89E-04 | -0.31 |
| ILMN_2259818 | MFI2         | 7.96E-04 | 0.29  |
| ILMN_1726809 | BHLHB3       | 7.96E-04 | -0.43 |
| ILMN_1790228 | FURIN        | 7.97E-04 | 0.29  |
| ILMN_2284744 | HNMT         | 8.02E-04 | -0.36 |
| ILMN_1677843 | RAB24        | 8.02E-04 | -0.42 |
| ILMN_1658327 | BAZ1A        | 8.02E-04 | 0.28  |
| ILMN_2355033 | KIAA1147     | 8.03E-04 | -0.50 |
| ILMN_1707585 | SLC46A2      | 8.04E-04 | -0.45 |
| ILMN_1731113 | ZBTB43       | 8.06E-04 | 0.32  |
| ILMN_1765641 | SEMA3A       | 8.06E-04 | -0.26 |
| ILMN_1689329 | SCD          | 8.08E-04 | -0.53 |
| ILMN_1782488 | RNASEH2B     | 8.11E-04 | -0.34 |
| ILMN_1763036 | CLCN6        | 8.11E-04 | -0.29 |
| ILMN_1723632 | PIGC         | 8.16E-04 | -0.40 |
| ILMN_2133316 | GIMAP7       | 8.16E-04 | -0.22 |
| ILMN_1796235 | CIRH1A       | 8.16E-04 | 0.36  |
| ILMN_1805800 | RAB5A        | 8.18E-04 | 0.39  |
| ILMN_1803686 | ADA          | 8.20E-04 | -0.39 |
| ILMN_1700378 | ZWILCH       | 8.22E-04 | 0.19  |
| ILMN_1687410 | OSBPL11      | 8.22E-04 | -0.33 |
| ILMN_1768958 | RASGRP1      | 8.22E-04 | 0.20  |
| ILMN_2319077 | FAS          | 8.25E-04 | 0.35  |
| ILMN_1762899 | EGR1         | 8.26E-04 | 0.39  |
| ILMN_3234997 | MAP7D1       | 8.34E-04 | 0.36  |
| ILMN_2164978 | PDP2         | 8.37E-04 | 0.19  |
| ILMN_1727098 | PPP1R16B     | 8.38E-04 | 0.29  |
| ILMN_1703263 | SP140        | 8.42E-04 | -0.32 |
| ILMN_1663080 | LFNG         | 8.53E-04 | -0.42 |
| ILMN_1750518 | THOC4        | 8.55E-04 | 0.36  |
| ILMN_1771286 | LOC653513    | 8.55E-04 | -0.51 |
| ILMN_1680390 | GCNT2        | 8.56E-04 | -0.26 |
| ILMN_1741564 | DCTN4        | 8.59E-04 | -0.30 |
| ILMN_1651950 | TPST1        | 8.61E-04 | -0.39 |
| ILMN_1779095 | CEBPE        | 8.62E-04 | -0.18 |
| ILMN_1741506 | LOC149134    | 8.62E-04 | -0.28 |
| ILMN_1710756 | ENO1         | 8.63E-04 | 0.36  |
| ILMN_2388177 | SPATA7       | 8.65E-04 | -0.23 |
| ILMN_1710092 | ZBTB46       | 8.75E-04 | 0.32  |
| ILMN_2329679 | TPST2        | 8.78E-04 | -0.43 |
| ILMN_1764788 | TNFRSF1B     | 8.82E-04 | -0.45 |
| ILMN_1784608 | CLEC2B       | 8.82E-04 | -0.31 |
| ILMN_1729237 | CYB5R1       | 8.82E-04 | -0.41 |

|              |           |          |       |
|--------------|-----------|----------|-------|
| ILMN_2327947 | SLC25A25  | 8.82E-04 | 0.22  |
| ILMN_1798395 | PIGH      | 8.86E-04 | 0.31  |
| ILMN_1711493 | PRAM1     | 8.86E-04 | -0.48 |
| ILMN_1713867 | PMFBP1    | 8.86E-04 | -0.32 |
| ILMN_1738816 | FOXO1     | 8.86E-04 | 0.25  |
| ILMN_1769229 | BCL2A1    | 8.89E-04 | -0.44 |
| ILMN_1767542 | THAP10    | 8.96E-04 | -0.22 |
| ILMN_1804863 | FKBP15    | 8.96E-04 | -0.39 |
| ILMN_1654685 | MCTP1     | 8.96E-04 | -0.37 |
| ILMN_1798659 | CCDC28A   | 9.03E-04 | -0.37 |
| ILMN_1689097 | NAT5      | 9.03E-04 | 0.40  |
| ILMN_2406532 | F11R      | 9.03E-04 | -0.30 |
| ILMN_1706217 | TLR4      | 9.04E-04 | -0.35 |
| ILMN_1716272 | KBTBD8    | 9.05E-04 | 0.34  |
| ILMN_2415170 | VPS8      | 9.05E-04 | -0.30 |
| ILMN_1806867 | PPM1G     | 9.06E-04 | 0.40  |
| ILMN_1881081 |           | 9.06E-04 | -0.32 |
| ILMN_1706498 | DSE       | 9.13E-04 | 0.38  |
| ILMN_2072101 | C4orf49   | 9.17E-04 | -0.15 |
| ILMN_1711611 | LOC653907 | 9.21E-04 | 0.23  |
| ILMN_1860638 |           | 9.26E-04 | -0.36 |
| ILMN_1680339 | PDGFRL    | 9.31E-04 | 0.38  |
| ILMN_1652787 | PIK3AP1   | 9.31E-04 | -0.43 |
| ILMN_2289593 | FXVD2     | 9.36E-04 | -0.32 |
| ILMN_1786189 | MKI67IP   | 9.37E-04 | 0.38  |
| ILMN_1724474 | CARD16    | 9.37E-04 | -0.18 |
| ILMN_3210914 | LOC344887 | 9.39E-04 | -0.25 |
| ILMN_1732074 | LOC648210 | 9.40E-04 | 0.50  |
| ILMN_1716547 | NAGK      | 9.40E-04 | -0.41 |
| ILMN_1809931 | NDRG1     | 9.51E-04 | -0.52 |
| ILMN_2326953 | LAT2      | 9.54E-04 | -0.39 |
| ILMN_2366388 | PRDX1     | 9.55E-04 | -0.49 |
| ILMN_1761463 | EFHD2     | 9.56E-04 | 0.38  |
| ILMN_1656574 | PCGF6     | 9.62E-04 | 0.31  |
| ILMN_1683664 | LOC650369 | 9.63E-04 | 0.45  |
| ILMN_1685661 | RRP15     | 9.67E-04 | 0.29  |
| ILMN_2160764 | HBP1      | 9.68E-04 | -0.36 |
| ILMN_1813911 | HEXA      | 9.77E-04 | -0.22 |
| ILMN_1668417 | WASPIP    | 9.85E-04 | -0.35 |
| ILMN_1658437 | SFXN4     | 9.91E-04 | 0.36  |
| ILMN_2367753 | ATP2B4    | 9.94E-04 | -0.27 |
| ILMN_1797735 | C1orf21   | 9.94E-04 | -0.14 |
| ILMN_1746968 | PHF1      | 9.95E-04 | -0.27 |
| ILMN_2376416 | UBXN11    | 9.96E-04 | -0.26 |
| ILMN_1901616 |           | 9.97E-04 | -0.30 |
| ILMN_1695432 | TPST2     | 9.98E-04 | -0.43 |

|              |           |          |       |
|--------------|-----------|----------|-------|
| ILMN_2162860 | SLFN11    | 9.99E-04 | -0.43 |
| ILMN_1727862 | HPS4      | 9.99E-04 | -0.17 |
| ILMN_1755643 | MGAT4A    | 9.99E-04 | -0.43 |
| ILMN_1672356 | ANKRD13D  | 1.00E-03 | -0.24 |
| ILMN_1751708 | ITM2B     | 1.00E-03 | -0.47 |
| ILMN_1678054 | TRIM21    | 1.01E-03 | -0.42 |
| ILMN_1664978 | TJP2      | 1.01E-03 | 0.40  |
| ILMN_1707434 | LOC653778 | 1.02E-03 | -0.28 |
| ILMN_1733675 | MPP1      | 1.02E-03 | -0.56 |
| ILMN_1782922 | PDE4B     | 1.02E-03 | -0.18 |
| ILMN_1807016 | LHX2      | 1.03E-03 | 0.33  |
| ILMN_2297765 | KCNMA1    | 1.03E-03 | -0.59 |
| ILMN_2148469 | RASL11B   | 1.03E-03 | -0.55 |
| ILMN_2342638 | ASGR2     | 1.04E-03 | 0.20  |
| ILMN_1743032 | CTSS      | 1.04E-03 | -0.44 |
| ILMN_2185845 | BRSK1     | 1.04E-03 | -0.46 |
| ILMN_1777061 | ZSWIM6    | 1.04E-03 | -0.46 |
| ILMN_1737396 | PSMD14    | 1.04E-03 | 0.36  |
| ILMN_1673543 | PGM2      | 1.04E-03 | 0.32  |
| ILMN_1716876 | MED27     | 1.05E-03 | 0.33  |
| ILMN_2142117 | LYPLAL1   | 1.05E-03 | -0.39 |
| ILMN_1682675 | TWF1      | 1.06E-03 | 0.19  |
| ILMN_2329927 | ABCG1     | 1.06E-03 | -0.27 |
| ILMN_1709590 | PGM5      | 1.06E-03 | -0.35 |
| ILMN_1654340 | UGP2      | 1.06E-03 | 0.20  |
| ILMN_1713813 | LOC400578 | 1.06E-03 | 0.36  |
| ILMN_1679725 | PCYOX1    | 1.06E-03 | -0.31 |
| ILMN_2200153 | GAPDHS    | 1.06E-03 | 0.14  |
| ILMN_1736015 | PHF17     | 1.07E-03 | 0.27  |
| ILMN_1738736 | SNX4      | 1.07E-03 | 0.33  |
| ILMN_1768260 | GAS6      | 1.08E-03 | 0.12  |
| ILMN_1758778 | CEP110    | 1.08E-03 | -0.26 |
| ILMN_1808405 | HLA-DQA1  | 1.08E-03 | 0.64  |
| ILMN_1702899 | PLEKHA7   | 1.08E-03 | -0.22 |
| ILMN_1675258 | LOC441268 | 1.09E-03 | -0.30 |
| ILMN_1675674 | UBE4B     | 1.09E-03 | -0.26 |
| ILMN_1723235 | DUS3L     | 1.09E-03 | 0.25  |
| ILMN_1789944 | PGAM5     | 1.10E-03 | 0.24  |
| ILMN_1765122 | MAP3K2    | 1.11E-03 | -0.33 |
| ILMN_1764396 | HDAC4     | 1.12E-03 | -0.27 |
| ILMN_1788160 | KIF5B     | 1.12E-03 | 0.38  |
| ILMN_2192693 | EIF3M     | 1.12E-03 | 0.37  |
| ILMN_1752355 | MPEG1     | 1.13E-03 | -0.22 |
| ILMN_2411915 | ATG4B     | 1.13E-03 | 0.34  |
| ILMN_2399769 | GPR177    | 1.13E-03 | -0.40 |
| ILMN_1687721 | PROC      | 1.13E-03 | -0.17 |



|              |              |          |       |
|--------------|--------------|----------|-------|
| ILMN_2386973 | PKP2         | 1.13E-03 | 0.18  |
| ILMN_1661266 | HLA-DQB1     | 1.14E-03 | 0.35  |
| ILMN_2399463 | VAV3         | 1.14E-03 | -0.40 |
| ILMN_2204876 | FLVCR2       | 1.15E-03 | 0.54  |
| ILMN_2371724 | CEACAM1      | 1.15E-03 | -0.17 |
| ILMN_2226304 | ANKRD50      | 1.15E-03 | -0.26 |
| ILMN_1764769 | VWA5A        | 1.15E-03 | -0.39 |
| ILMN_1709880 | RPLP0        | 1.15E-03 | 0.40  |
| ILMN_1682993 | NKG7         | 1.15E-03 | -0.29 |
| ILMN_1794333 | POU2F1       | 1.16E-03 | -0.26 |
| ILMN_1712128 | LRRRC8B      | 1.16E-03 | 0.21  |
| ILMN_1657810 | PPM1M        | 1.16E-03 | 0.37  |
| ILMN_1686454 | TIFA         | 1.17E-03 | 0.18  |
| ILMN_2155172 | BRIX1        | 1.17E-03 | 0.31  |
| ILMN_3278004 | LOC100132652 | 1.17E-03 | -0.26 |
| ILMN_1676213 | SRPX2        | 1.17E-03 | -0.28 |
| ILMN_3227023 | SNHG7        | 1.17E-03 | -0.31 |
| ILMN_1771019 | MTMR4        | 1.18E-03 | -0.36 |
| ILMN_1677239 | CCDC14       | 1.18E-03 | -0.34 |
| ILMN_1693431 | C13orf31     | 1.18E-03 | -0.48 |
| ILMN_3226012 | LOC728698    | 1.18E-03 | 0.48  |
| ILMN_1662086 | GUCA1A       | 1.19E-03 | 1.04  |
| ILMN_1791507 | LOC728772    | 1.20E-03 | 0.27  |
| ILMN_2229261 | SIGLEC16     | 1.20E-03 | -0.90 |
| ILMN_1660063 | POLE4        | 1.20E-03 | -0.39 |
| ILMN_1729374 | ETFB         | 1.21E-03 | 0.43  |
| ILMN_1765044 | CUTC         | 1.21E-03 | 0.40  |
| ILMN_1739756 | KIR2DL4      | 1.21E-03 | -0.34 |
| ILMN_1737580 | PPPDE2       | 1.21E-03 | 0.36  |
| ILMN_3306482 | LOC730107    | 1.22E-03 | 0.29  |
| ILMN_1684054 | ASAH1        | 1.23E-03 | -0.47 |
| ILMN_1713402 | FAM160A2     | 1.23E-03 | -0.21 |
| ILMN_1656869 | LGALS9B      | 1.24E-03 | 0.23  |
| ILMN_3282587 | LOC644914    | 1.24E-03 | -0.37 |
| ILMN_1680727 | GLRX2        | 1.24E-03 | 0.45  |
| ILMN_2271894 | ZNF654       | 1.24E-03 | 0.27  |
| ILMN_1757287 | MAPK6        | 1.24E-03 | 0.37  |
| ILMN_1713892 | C4orf34      | 1.24E-03 | -0.41 |
| ILMN_1776515 | MPPE1        | 1.24E-03 | -0.34 |
| ILMN_2047599 | TMEM50B      | 1.24E-03 | -0.33 |
| ILMN_1810864 | PMP22        | 1.24E-03 | -0.46 |
| ILMN_2050023 | CCDC23       | 1.24E-03 | -0.40 |
| ILMN_2255133 | BCL11A       | 1.25E-03 | -0.36 |
| ILMN_2400372 | SULT1A2      | 1.25E-03 | -0.31 |
| ILMN_1681283 | HIF1A        | 1.25E-03 | -0.32 |
| ILMN_1666208 | C14orf106    | 1.25E-03 | -0.33 |

|              |              |          |       |
|--------------|--------------|----------|-------|
| ILMN_1743301 | MSR1         | 1.26E-03 | -0.46 |
| ILMN_1790329 | DDO          | 1.26E-03 | 0.16  |
| ILMN_2387090 | CGGBP1       | 1.26E-03 | 0.40  |
| ILMN_3183139 | LOC100130914 | 1.26E-03 | -0.23 |
| ILMN_1784651 | NAGA         | 1.26E-03 | 0.26  |
| ILMN_2220184 | GFPT1        | 1.26E-03 | 0.42  |
| ILMN_1654516 | TMEM120A     | 1.27E-03 | -0.32 |
| ILMN_1796074 | C18orf56     | 1.27E-03 | -0.20 |
| ILMN_2414027 | CKLF         | 1.27E-03 | 0.44  |
| ILMN_3235477 | RRP1         | 1.27E-03 | 0.25  |
| ILMN_3192001 | CCL14        | 1.27E-03 | 0.23  |
| ILMN_1655545 | ZMYND12      | 1.27E-03 | -0.28 |
| ILMN_1779857 | KLF4         | 1.28E-03 | 0.22  |
| ILMN_1665964 | GAB2         | 1.28E-03 | 0.34  |
| ILMN_2210934 | NR3C2        | 1.28E-03 | -0.18 |
| ILMN_1789196 | TPM2         | 1.28E-03 | 0.42  |
| ILMN_1729019 | 42254        | 1.29E-03 | 0.32  |
| ILMN_1734276 | PMEPA1       | 1.29E-03 | -0.14 |
| ILMN_3214389 | LOC100133583 | 1.29E-03 | 0.60  |
| ILMN_2059549 | SYK          | 1.29E-03 | -0.37 |
| ILMN_1764364 | FAM19A3      | 1.30E-03 | 0.29  |
| ILMN_1772487 | SFRS14       | 1.30E-03 | 0.26  |
| ILMN_3286389 | LOC728047    | 1.32E-03 | -0.18 |
| ILMN_1805658 | LTV1         | 1.32E-03 | 0.38  |
| ILMN_1724139 | TMEM123      | 1.32E-03 | 0.43  |
| ILMN_2047618 | KCNE1        | 1.32E-03 | 0.29  |
| ILMN_1727738 | RAB33B       | 1.32E-03 | -0.25 |
| ILMN_1718718 | MKKS         | 1.32E-03 | 0.34  |
| ILMN_1732612 | SHB          | 1.34E-03 | 0.24  |
| ILMN_1709772 | SNX5         | 1.34E-03 | 0.34  |
| ILMN_2371147 | BCL7C        | 1.35E-03 | 0.31  |
| ILMN_1680246 | MAT2B        | 1.35E-03 | 0.30  |
| ILMN_1758418 | TNFSF13B     | 1.35E-03 | -0.44 |
| ILMN_2362346 | TRPV4        | 1.35E-03 | -0.17 |
| ILMN_1695414 | ASF1B        | 1.36E-03 | -0.20 |
| ILMN_1808821 | COMMD9       | 1.37E-03 | -0.33 |
| ILMN_1809417 | LRFN4        | 1.37E-03 | 0.22  |
| ILMN_2403994 | RALY         | 1.37E-03 | 0.31  |
| ILMN_1745112 | FAM102A      | 1.37E-03 | 0.17  |
| ILMN_1763852 | ACACB        | 1.38E-03 | -0.29 |
| ILMN_2371055 | EFNA1        | 1.38E-03 | 0.94  |
| ILMN_1658526 | RYK          | 1.38E-03 | 0.30  |
| ILMN_1727309 | FAM82A2      | 1.38E-03 | -0.39 |
| ILMN_3249477 | CHIT1        | 1.39E-03 | -0.46 |
| ILMN_1814194 | TCF4         | 1.39E-03 | -0.37 |
| ILMN_3260070 | LOC100128266 | 1.40E-03 | 0.37  |

|              |              |          |       |
|--------------|--------------|----------|-------|
| ILMN_2379130 | IRAK1        | 1.41E-03 | -0.41 |
| ILMN_3234436 | LOC100132528 | 1.41E-03 | 0.40  |
| ILMN_1748476 | NOP58        | 1.41E-03 | 0.40  |
| ILMN_1707236 | HCCS         | 1.41E-03 | 0.30  |
| ILMN_3248786 | LOC647588    | 1.41E-03 | -0.32 |
| ILMN_1757361 | NCF4         | 1.42E-03 | -0.23 |
| ILMN_1857335 |              | 1.43E-03 | -0.21 |
| ILMN_1746846 | TTLL4        | 1.43E-03 | -0.26 |
| ILMN_1691611 | LOC645436    | 1.43E-03 | 0.36  |
| ILMN_2113535 | PCYOX1       | 1.43E-03 | -0.32 |
| ILMN_1694882 | AMY2B        | 1.43E-03 | -0.16 |
| ILMN_1758806 | C21orf2      | 1.43E-03 | -0.26 |
| ILMN_1797372 | C3orf58      | 1.43E-03 | -0.26 |
| ILMN_2124471 | SLC36A1      | 1.43E-03 | -0.40 |
| ILMN_1681310 | MFSD7        | 1.43E-03 | 0.32  |
| ILMN_1727532 | OLFML3       | 1.43E-03 | -0.45 |
| ILMN_1680928 | DNM3         | 1.43E-03 | -0.19 |
| ILMN_1779852 | LOC387934    | 1.43E-03 | 0.55  |
| ILMN_1716026 | ARMCX6       | 1.43E-03 | -0.29 |
| ILMN_1769615 | FLRT2        | 1.43E-03 | -0.45 |
| ILMN_1678629 | DOCK7        | 1.43E-03 | 0.42  |
| ILMN_2405797 | REPS2        | 1.43E-03 | -0.18 |
| ILMN_1694810 | PANX2        | 1.44E-03 | 0.28  |
| ILMN_2404049 | RBM38        | 1.45E-03 | -0.28 |
| ILMN_1670895 | ZNF207       | 1.45E-03 | 0.37  |
| ILMN_1788192 | ARMCX1       | 1.47E-03 | -0.40 |
| ILMN_1730734 | TMEM205      | 1.47E-03 | -0.52 |
| ILMN_1772224 | KCNJ5        | 1.47E-03 | -0.18 |
| ILMN_2362581 | FNDC3A       | 1.47E-03 | -0.29 |
| ILMN_1731928 | LY9          | 1.47E-03 | 0.26  |
| ILMN_2181445 | BCL2L13      | 1.48E-03 | -0.36 |
| ILMN_1777296 | ACTB         | 1.48E-03 | 0.45  |
| ILMN_1680314 | TXN          | 1.48E-03 | 0.54  |
| ILMN_1654571 | FCHO1        | 1.49E-03 | 0.28  |
| ILMN_1811957 | CAMSAP1      | 1.49E-03 | 0.31  |
| ILMN_1778064 | FICD         | 1.50E-03 | 0.28  |
| ILMN_1692123 | ELOVL3       | 1.50E-03 | -0.20 |
| ILMN_1676385 | PAK2         | 1.50E-03 | 0.22  |
| ILMN_2383305 | GPATCH4      | 1.51E-03 | 0.28  |
| ILMN_1761155 | PABPC1       | 1.52E-03 | 0.35  |
| ILMN_1773200 | CP110        | 1.52E-03 | -0.32 |
| ILMN_1857915 | LOC401397    | 1.52E-03 | -0.38 |
| ILMN_1671489 | PC           | 1.53E-03 | -0.31 |
| ILMN_1719433 | CD1D         | 1.53E-03 | -0.31 |
| ILMN_1864422 |              | 1.53E-03 | -0.32 |
| ILMN_1684585 | ACSL1        | 1.55E-03 | -0.48 |

|              |              |          |       |
|--------------|--------------|----------|-------|
| ILMN_2320513 | APBB3        | 1.56E-03 | -0.26 |
| ILMN_1664167 | RPF2         | 1.56E-03 | 0.32  |
| ILMN_1793025 | OSAP         | 1.57E-03 | -0.17 |
| ILMN_1736327 | CDC42EP3     | 1.57E-03 | 0.11  |
| ILMN_1728059 | LOC645236    | 1.57E-03 | -0.31 |
| ILMN_1714401 | SNX27        | 1.57E-03 | -0.49 |
| ILMN_1662417 | LRPPRC       | 1.57E-03 | 0.29  |
| ILMN_1723520 | CD1A         | 1.58E-03 | 0.33  |
| ILMN_1811370 | HSD11B1      | 1.59E-03 | 0.46  |
| ILMN_2054392 | PPIL1        | 1.59E-03 | 0.26  |
| ILMN_1654735 | SLCO3A1      | 1.59E-03 | 0.41  |
| ILMN_1661537 | LEPROT       | 1.59E-03 | -0.36 |
| ILMN_1718961 | BNIP3L       | 1.59E-03 | -0.36 |
| ILMN_1713829 | PTGES        | 1.59E-03 | -0.70 |
| ILMN_2356838 | CEPT1        | 1.60E-03 | 0.42  |
| ILMN_1744471 | ZNF654       | 1.60E-03 | 0.38  |
| ILMN_3254984 | LOC100129759 | 1.60E-03 | 0.37  |
| ILMN_1713964 | BTBD3        | 1.60E-03 | 0.27  |
| ILMN_1699737 | TRAP1        | 1.61E-03 | 0.30  |
| ILMN_3228688 | LOC730415    | 1.61E-03 | 0.39  |
| ILMN_1690566 | RASSF4       | 1.61E-03 | -0.33 |
| ILMN_1724407 | TACC3        | 1.62E-03 | -0.29 |
| ILMN_1718932 | MTRR         | 1.62E-03 | 0.34  |
| ILMN_1757867 | MTM          | 1.62E-03 | -0.19 |
| ILMN_1730176 | ITGAX        | 1.63E-03 | 0.23  |
| ILMN_1701111 | RP5-1022P6.2 | 1.63E-03 | -0.33 |
| ILMN_1666597 | PI4KB        | 1.63E-03 | -0.31 |
| ILMN_1659075 | HLA-DOA      | 1.63E-03 | 0.21  |
| ILMN_1705032 | SEH1L        | 1.63E-03 | 0.21  |
| ILMN_2374687 | PTPN13       | 1.63E-03 | 0.23  |
| ILMN_1804955 | CTSF         | 1.63E-03 | -0.24 |
| ILMN_1724686 | CLDN1        | 1.64E-03 | 0.16  |
| ILMN_1669940 | TMEM38B      | 1.64E-03 | -0.37 |
| ILMN_2374683 | PTPN13       | 1.64E-03 | 0.19  |
| ILMN_2384544 | ADAM15       | 1.65E-03 | 0.29  |
| ILMN_1695576 | MRPL24       | 1.65E-03 | 0.37  |
| ILMN_1770245 | EPB41L5      | 1.65E-03 | -0.31 |
| ILMN_1743397 | PIGW         | 1.65E-03 | 0.24  |
| ILMN_2222880 | SLC25A42     | 1.66E-03 | -0.23 |
| ILMN_2173451 | GPI          | 1.66E-03 | 0.34  |
| ILMN_3242603 | GTF2H2B      | 1.66E-03 | 0.35  |
| ILMN_1785158 | HERPUD2      | 1.67E-03 | 0.35  |
| ILMN_1771664 | CLEC4E       | 1.67E-03 | -0.30 |
| ILMN_1722900 | EIF4A1       | 1.67E-03 | 0.38  |
| ILMN_3307025 | ZDHHC4       | 1.67E-03 | -0.34 |
| ILMN_1712413 | RPL39L       | 1.68E-03 | -0.29 |

|              |               |          |       |
|--------------|---------------|----------|-------|
| ILMN_1767747 | HDAC2         | 1.68E-03 | 0.38  |
| ILMN_1757384 | RAN           | 1.69E-03 | 0.39  |
| ILMN_1672738 | LOC283340     | 1.69E-03 | -0.23 |
| ILMN_3193306 | C14orf109     | 1.69E-03 | -0.39 |
| ILMN_2351298 | WIPF1         | 1.69E-03 | -0.37 |
| ILMN_1680757 | LRRC26        | 1.70E-03 | -0.17 |
| ILMN_2352009 | ACADVL        | 1.70E-03 | 0.39  |
| ILMN_3269405 | HNRNPM        | 1.70E-03 | 0.42  |
| ILMN_1761969 | DERL2         | 1.71E-03 | -0.37 |
| ILMN_1701375 | FBXW5         | 1.72E-03 | -0.29 |
| ILMN_1685703 | ACOX2         | 1.72E-03 | 0.49  |
| ILMN_1787923 | PNPLA2        | 1.72E-03 | -0.31 |
| ILMN_1675462 | LSM6          | 1.73E-03 | -0.28 |
| ILMN_1762260 | C3            | 1.73E-03 | -0.28 |
| ILMN_1802808 | LOC654103     | 1.73E-03 | -0.29 |
| ILMN_1813701 | RASAL2        | 1.74E-03 | 0.29  |
| ILMN_1697802 | LOC654244     | 1.74E-03 | 0.31  |
| ILMN_3275590 | LOC647302     | 1.75E-03 | -0.38 |
| ILMN_2404625 | LAT           | 1.75E-03 | -0.38 |
| ILMN_2045419 | BNIP3L        | 1.75E-03 | -0.34 |
| ILMN_2209551 | SIGLECP3      | 1.76E-03 | 0.12  |
| ILMN_1681252 | C17orf44      | 1.78E-03 | -0.40 |
| ILMN_1659257 | TNFRSF8       | 1.78E-03 | -0.24 |
| ILMN_2157441 | HLA-DRA       | 1.78E-03 | 0.43  |
| ILMN_1682717 | IER3          | 1.79E-03 | -0.36 |
| ILMN_1711608 | SSBP2         | 1.80E-03 | 0.33  |
| ILMN_2046730 | S100A10       | 1.81E-03 | -0.37 |
| ILMN_2058251 | VIM           | 1.83E-03 | 0.39  |
| ILMN_1783247 | C10orf11      | 1.83E-03 | -0.31 |
| ILMN_1670028 | LPIN2         | 1.83E-03 | -0.33 |
| ILMN_1654287 | ADCY9         | 1.83E-03 | 0.20  |
| ILMN_3299407 | LOC728553     | 1.83E-03 | 0.43  |
| ILMN_2374164 | HERPUD1       | 1.83E-03 | -0.40 |
| ILMN_1753265 | C12orf76      | 1.84E-03 | 0.29  |
| ILMN_1764383 | MCOLN1        | 1.84E-03 | 0.34  |
| ILMN_1780769 | TUBB2C        | 1.84E-03 | 0.37  |
| ILMN_1660315 | SPN           | 1.84E-03 | 0.19  |
| ILMN_1784785 | COPS7B        | 1.85E-03 | 0.36  |
| ILMN_1803856 | DKFZP586I1420 | 1.86E-03 | -0.34 |
| ILMN_1745110 | LAPTM4A       | 1.86E-03 | -0.33 |
| ILMN_1717809 | RNF24         | 1.86E-03 | 0.30  |
| ILMN_1712718 | BPNT1         | 1.88E-03 | 0.26  |
| ILMN_1718712 | C20orf177     | 1.88E-03 | -0.31 |
| ILMN_1715616 | PPIL5         | 1.88E-03 | 0.24  |
| ILMN_1808508 | KITLG         | 1.88E-03 | -0.41 |
| ILMN_1691731 | PARP14        | 1.89E-03 | -0.35 |

|              |              |          |       |
|--------------|--------------|----------|-------|
| ILMN_2120695 | TSPAN7       | 1.89E-03 | 0.24  |
| ILMN_1811330 | FAM134B      | 1.89E-03 | -0.23 |
| ILMN_1737964 | HIATL1       | 1.89E-03 | 0.40  |
| ILMN_1782247 | KAT2A        | 1.89E-03 | 0.33  |
| ILMN_1698533 | IDH3A        | 1.90E-03 | 0.30  |
| ILMN_1821176 |              | 1.91E-03 | -0.44 |
| ILMN_1709026 | C6orf145     | 1.92E-03 | 0.18  |
| ILMN_3181695 | LOC100130178 | 1.92E-03 | -0.32 |
| ILMN_1793474 | INSIG1       | 1.92E-03 | -0.49 |
| ILMN_1737644 | TMEM219      | 1.92E-03 | -0.35 |
| ILMN_2131880 | DPY30        | 1.93E-03 | -0.35 |
| ILMN_2074748 | HAL          | 1.93E-03 | -0.13 |
| ILMN_3269537 | LOC100130562 | 1.93E-03 | 0.30  |
| ILMN_1651819 | GALNT11      | 1.95E-03 | -0.33 |
| ILMN_1662973 | CD82         | 1.95E-03 | -0.29 |
| ILMN_2253732 | ST8SIA4      | 1.95E-03 | -0.36 |
| ILMN_1675542 | LOC729148    | 1.96E-03 | -0.38 |
| ILMN_1659914 | C9orf98      | 1.96E-03 | -0.29 |
| ILMN_1746252 | LOC391811    | 1.96E-03 | 0.43  |
| ILMN_1658110 | C18orf19     | 1.96E-03 | 0.19  |
| ILMN_2072598 | LOC401357    | 1.97E-03 | -0.25 |
| ILMN_3236367 | IFFO2        | 1.98E-03 | 0.15  |
| ILMN_3225505 | LOC728553    | 1.98E-03 | 0.36  |
| ILMN_1738742 | PLAT         | 1.98E-03 | 0.24  |
| ILMN_1733390 | LARP1B       | 1.99E-03 | 0.28  |
| ILMN_3244434 | ARAP2        | 1.99E-03 | 0.32  |
| ILMN_1798249 | AK3L1        | 1.99E-03 | 0.23  |
| ILMN_3243928 | DDX60L       | 1.99E-03 | -0.31 |
| ILMN_1674285 | LOC401233    | 2.01E-03 | -0.40 |
| ILMN_1693338 | CYP1B1       | 2.01E-03 | -0.38 |
| ILMN_1651710 | IQCD         | 2.01E-03 | -0.12 |
| ILMN_2215640 | TUBA3D       | 2.01E-03 | 0.27  |
| ILMN_1757702 | LOC647673    | 2.02E-03 | -0.33 |
| ILMN_1809607 | PPIF         | 2.02E-03 | -0.18 |
| ILMN_1843198 |              | 2.02E-03 | 0.35  |
| ILMN_1704286 | FXVD5        | 2.02E-03 | -0.35 |
| ILMN_1701643 | GDPD5        | 2.02E-03 | 0.16  |
| ILMN_3249501 | ZNF697       | 2.02E-03 | 0.28  |
| ILMN_1686750 | MGEA5        | 2.02E-03 | -0.33 |
| ILMN_1766176 | RAP1A        | 2.02E-03 | 0.25  |
| ILMN_1744534 | LYRM5        | 2.02E-03 | -0.33 |
| ILMN_2363361 | SFXN4        | 2.02E-03 | 0.31  |
| ILMN_1674706 | MTHFD2       | 2.03E-03 | 0.46  |
| ILMN_3247645 | LOC550643    | 2.03E-03 | -0.34 |
| ILMN_2293758 | AKAP11       | 2.04E-03 | 0.31  |
| ILMN_2225537 | PTGR1        | 2.04E-03 | -0.50 |

|              |           |          |       |
|--------------|-----------|----------|-------|
| ILMN_3190833 | CCRL2     | 2.04E-03 | 0.33  |
| ILMN_1770466 | ATP5G3    | 2.04E-03 | 0.21  |
| ILMN_1785821 | TTRAP     | 2.04E-03 | -0.42 |
| ILMN_3282768 | LOC644879 | 2.04E-03 | 0.20  |
| ILMN_3276990 | LOC389141 | 2.04E-03 | 0.40  |
| ILMN_1794260 | FBXL10    | 2.05E-03 | 0.36  |
| ILMN_1675844 | WDR1      | 2.05E-03 | 0.36  |
| ILMN_1721629 | ZNF654    | 2.05E-03 | 0.28  |
| ILMN_1659017 | C11orf74  | 2.05E-03 | -0.30 |
| ILMN_1784287 | TGFBR3    | 2.05E-03 | 0.32  |
| ILMN_2338038 | AK3L1     | 2.05E-03 | 0.32  |
| ILMN_1655191 | CASZ1     | 2.05E-03 | 0.23  |
| ILMN_2323172 | CSF3R     | 2.06E-03 | -0.16 |
| ILMN_3310491 | MIR1978   | 2.06E-03 | -0.48 |
| ILMN_3296923 | LOC341784 | 2.07E-03 | 0.25  |
| ILMN_1803745 | SUOX      | 2.07E-03 | 0.39  |
| ILMN_1674046 | C10orf128 | 2.07E-03 | 0.38  |
| ILMN_1738468 | KEL       | 2.07E-03 | -0.21 |
| ILMN_1777526 | MED20     | 2.08E-03 | -0.36 |
| ILMN_1765684 | C19orf70  | 2.09E-03 | 0.31  |
| ILMN_1694400 | MSR1      | 2.09E-03 | -0.41 |
| ILMN_1718734 | MLLT6     | 2.10E-03 | 0.36  |
| ILMN_1786658 | BOLA3     | 2.10E-03 | 0.44  |
| ILMN_2296036 | PTPN2     | 2.10E-03 | 0.25  |
| ILMN_2413158 | PODXL     | 2.10E-03 | 0.25  |
| ILMN_1752965 | GREM1     | 2.12E-03 | 0.34  |
| ILMN_1771987 | SLC44A2   | 2.14E-03 | -0.36 |
| ILMN_2324056 | GNL3      | 2.14E-03 | 0.36  |
| ILMN_3251445 | MED27     | 2.14E-03 | 0.24  |
| ILMN_1729217 | FAM131A   | 2.14E-03 | 0.44  |
| ILMN_3243351 | LOC646214 | 2.16E-03 | 0.36  |
| ILMN_1707137 | C17orf97  | 2.16E-03 | 0.32  |
| ILMN_2316878 | PTPRO     | 2.17E-03 | 0.32  |
| ILMN_2175894 | HNRPR     | 2.17E-03 | 0.34  |
| ILMN_1765876 | ARHGAP24  | 2.17E-03 | -0.19 |
| ILMN_1718336 | C7orf50   | 2.18E-03 | 0.36  |
| ILMN_1653180 | TPM4      | 2.18E-03 | 0.31  |
| ILMN_1672295 | ZC3H12A   | 2.18E-03 | 0.23  |
| ILMN_1730986 | MALT1     | 2.18E-03 | 0.31  |
| ILMN_1808047 | PHC2      | 2.19E-03 | -0.28 |
| ILMN_2335813 | GCH1      | 2.19E-03 | -0.19 |
| ILMN_2066066 | HLA-DRB6  | 2.19E-03 | 0.33  |
| ILMN_1739605 | LYPD3     | 2.19E-03 | 0.35  |
| ILMN_1668996 | C1QBP     | 2.20E-03 | 0.34  |
| ILMN_1656293 | GOSR2     | 2.20E-03 | 0.26  |
| ILMN_2139100 | SHISA5    | 2.20E-03 | -0.41 |

|              |           |          |       |
|--------------|-----------|----------|-------|
| ILMN_1737484 | RTN4R     | 2.20E-03 | 0.31  |
| ILMN_1811632 | FMO5      | 2.20E-03 | -0.19 |
| ILMN_1760858 | RAB8A     | 2.20E-03 | 0.41  |
| ILMN_1774287 | CFB       | 2.21E-03 | -0.40 |
| ILMN_3284114 | LOC399748 | 2.21E-03 | 0.39  |
| ILMN_3238274 | BTBD2     | 2.21E-03 | -0.37 |
| ILMN_1716564 | INTU      | 2.22E-03 | -0.17 |
| ILMN_1739815 | NLRP12    | 2.22E-03 | -0.11 |
| ILMN_2367384 | EPHB2     | 2.23E-03 | -0.23 |
| ILMN_1731612 | UCHL5     | 2.23E-03 | 0.26  |
| ILMN_3305949 | LOC730246 | 2.24E-03 | 0.43  |
| ILMN_2392274 | CD82      | 2.24E-03 | -0.36 |
| ILMN_1796063 | TRIM44    | 2.24E-03 | -0.35 |
| ILMN_1685012 | EAF1      | 2.24E-03 | -0.33 |
| ILMN_1659437 | TXNDC17   | 2.24E-03 | 0.35  |
| ILMN_2347068 | MKNK2     | 2.24E-03 | -0.36 |
| ILMN_1681644 | BIRC3     | 2.25E-03 | 0.23  |
| ILMN_1713397 | NCCRP1    | 2.25E-03 | 0.87  |
| ILMN_1697115 | FLJ12355  | 2.26E-03 | 0.27  |
| ILMN_1752478 | DHRS3     | 2.26E-03 | -0.35 |
| ILMN_1729115 | LOC651816 | 2.26E-03 | 0.31  |
| ILMN_1658926 | NOTCH3    | 2.26E-03 | -0.31 |
| ILMN_1769129 | CCL19     | 2.26E-03 | -0.33 |
| ILMN_1732151 | COL6A1    | 2.27E-03 | 0.30  |
| ILMN_1742853 | LOC652184 | 2.27E-03 | 0.31  |
| ILMN_1659659 | MAGEH1    | 2.27E-03 | -0.21 |
| ILMN_2263718 | SPAG9     | 2.27E-03 | 0.48  |
| ILMN_1727150 | DHRS9     | 2.28E-03 | -0.15 |
| ILMN_2334350 | BTBD3     | 2.28E-03 | 0.26  |
| ILMN_1770293 | KLF5      | 2.28E-03 | 0.13  |
| ILMN_1813846 | P2RX4     | 2.29E-03 | -0.30 |
| ILMN_1678671 | KLHL24    | 2.29E-03 | -0.35 |
| ILMN_1651557 | KDELC2    | 2.29E-03 | 0.23  |
| ILMN_1718621 | TSPAN32   | 2.29E-03 | 0.40  |
| ILMN_1704380 | INCA1     | 2.30E-03 | 0.16  |
| ILMN_1699772 | RRAGD     | 2.30E-03 | 0.36  |
| ILMN_1716583 | NME7      | 2.31E-03 | -0.29 |
| ILMN_1665148 | LOC648249 | 2.31E-03 | 0.32  |
| ILMN_1679383 | AKIRIN1   | 2.31E-03 | 0.17  |
| ILMN_1702534 | CD244     | 2.31E-03 | -0.20 |
| ILMN_2349610 | DPH3      | 2.31E-03 | 0.34  |
| ILMN_1658992 | DPM1      | 2.32E-03 | 0.37  |
| ILMN_1751901 | TMEM163   | 2.32E-03 | -0.56 |
| ILMN_1740505 | SGMS1     | 2.32E-03 | -0.26 |
| ILMN_1680109 | COL4A3BP  | 2.33E-03 | -0.48 |
| ILMN_1768814 | KLHL6     | 2.33E-03 | -0.36 |



|              |              |          |       |
|--------------|--------------|----------|-------|
| ILMN_1690282 | CRADD        | 2.33E-03 | -0.29 |
| ILMN_2094938 | OMA1         | 2.33E-03 | -0.21 |
| ILMN_1776967 | LRRRC50      | 2.34E-03 | -0.28 |
| ILMN_1723116 | AMFR         | 2.35E-03 | -0.31 |
| ILMN_2203896 | SMAD7        | 2.35E-03 | 0.33  |
| ILMN_2357438 | AURKA        | 2.36E-03 | 0.37  |
| ILMN_3188124 | LOC100130511 | 2.36E-03 | 0.46  |
| ILMN_1805064 | SCARNA9      | 2.37E-03 | 0.33  |
| ILMN_1744949 | RHOBTB3      | 2.37E-03 | -0.26 |
| ILMN_3251207 | TMEM19       | 2.38E-03 | -0.30 |
| ILMN_2414533 | ARMCX6       | 2.38E-03 | -0.32 |
| ILMN_1707720 | SLC1A5       | 2.38E-03 | 0.41  |
| ILMN_1716465 | RBP7         | 2.39E-03 | -0.22 |
| ILMN_1815626 | DHCR7        | 2.39E-03 | -0.34 |
| ILMN_1733997 | SIRPB1       | 2.40E-03 | -0.23 |
| ILMN_2153485 | NMNAT3       | 2.41E-03 | 0.30  |
| ILMN_1789775 | WDR74        | 2.41E-03 | 0.21  |
| ILMN_2045729 | WDR12        | 2.41E-03 | 0.29  |
| ILMN_3192791 | HNRNPM       | 2.41E-03 | 0.33  |
| ILMN_3200830 | LOC649553    | 2.42E-03 | 0.39  |
| ILMN_2388547 | EPSTI1       | 2.42E-03 | -0.39 |
| ILMN_1671427 | FBXW4        | 2.42E-03 | -0.28 |
| ILMN_1745034 | SLC11A2      | 2.42E-03 | 0.69  |
| ILMN_3249473 | LOC100133443 | 2.42E-03 | -0.17 |
| ILMN_2267787 | HPS1         | 2.44E-03 | 0.31  |
| ILMN_1768062 | ADK          | 2.44E-03 | 0.18  |
| ILMN_1675391 | SLC24A4      | 2.44E-03 | -0.19 |
| ILMN_3294318 | LOC644173    | 2.45E-03 | -0.30 |
| ILMN_1674522 | HIGD1A       | 2.46E-03 | 0.39  |
| ILMN_1749287 | TLR6         | 2.46E-03 | -0.20 |
| ILMN_1743373 | DLL1         | 2.46E-03 | -0.28 |
| ILMN_2306066 | FUS          | 2.47E-03 | 0.17  |
| ILMN_1777096 | TDG          | 2.47E-03 | 0.36  |
| ILMN_1771120 | TMEM45B      | 2.47E-03 | 0.14  |
| ILMN_1674402 | TMEM71       | 2.47E-03 | 0.32  |
| ILMN_1783598 | CAB39L       | 2.48E-03 | -0.32 |
| ILMN_1754507 | IRF4         | 2.48E-03 | 0.40  |
| ILMN_2123743 | FCER1G       | 2.48E-03 | -0.34 |
| ILMN_3229324 | SGK1         | 2.48E-03 | -0.36 |
| ILMN_1760778 | ENG          | 2.48E-03 | -0.40 |
| ILMN_1738992 | MNDA         | 2.49E-03 | -0.32 |
| ILMN_1777378 | COMM6        | 2.50E-03 | -0.37 |
| ILMN_1729453 | TSPAN9       | 2.51E-03 | -0.17 |
| ILMN_1811933 | SHMT1        | 2.51E-03 | -0.45 |
| ILMN_1706818 | THADA        | 2.52E-03 | -0.14 |
| ILMN_1689585 | C20orf194    | 2.52E-03 | -0.27 |

|              |              |          |       |
|--------------|--------------|----------|-------|
| ILMN_3300663 | LOC728661    | 2.52E-03 | -0.38 |
| ILMN_1744628 | FDX1L        | 2.52E-03 | 0.33  |
| ILMN_1710216 | AVEN         | 2.52E-03 | 0.27  |
| ILMN_1793950 | P704P        | 2.52E-03 | 0.30  |
| ILMN_3221721 | LOC728802    | 2.52E-03 | -0.18 |
| ILMN_1737314 | BCL6         | 2.52E-03 | 0.44  |
| ILMN_2346831 | MGAT2        | 2.52E-03 | 0.38  |
| ILMN_1756849 | HIST1H2AE    | 2.53E-03 | -0.17 |
| ILMN_1772731 | HAGH         | 2.53E-03 | 0.33  |
| ILMN_1816342 |              | 2.54E-03 | -0.30 |
| ILMN_1816603 |              | 2.55E-03 | -0.25 |
| ILMN_1689456 | ZBTB20       | 2.55E-03 | -0.19 |
| ILMN_1742789 | LPXN         | 2.55E-03 | -0.34 |
| ILMN_3183620 | LOC100128326 | 2.55E-03 | -0.24 |
| ILMN_1735231 | ZSWIM4       | 2.55E-03 | -0.26 |
| ILMN_1708130 | EHF          | 2.55E-03 | 0.34  |
| ILMN_1676719 | LOC644330    | 2.56E-03 | 0.30  |
| ILMN_1673282 | LAMP2        | 2.56E-03 | -0.36 |
| ILMN_1689274 | NIPA1        | 2.56E-03 | 0.31  |
| ILMN_3305993 | LOC728602    | 2.56E-03 | -0.35 |
| ILMN_3246315 | LOC100133697 | 2.56E-03 | 0.25  |
| ILMN_2180352 | DIP2B        | 2.57E-03 | 0.31  |
| ILMN_1758939 | RIPK2        | 2.57E-03 | 0.56  |
| ILMN_2348268 | IFFO1        | 2.58E-03 | -0.42 |
| ILMN_1655444 | LOC728492    | 2.59E-03 | 0.40  |
| ILMN_3239460 | OAZ2         | 2.59E-03 | -0.56 |
| ILMN_2109708 | ECGF1        | 2.59E-03 | -0.37 |
| ILMN_1758324 | SLCO5A1      | 2.59E-03 | 0.14  |
| ILMN_1809433 | XBP1         | 2.59E-03 | 0.51  |
| ILMN_1728047 | AKR1A1       | 2.59E-03 | -0.40 |
| ILMN_2089977 | FKBP9L       | 2.59E-03 | -0.35 |
| ILMN_1715885 | PTPN22       | 2.59E-03 | -0.27 |
| ILMN_1660451 | STARD13      | 2.59E-03 | -0.30 |
| ILMN_1778177 | ZNF207       | 2.60E-03 | 0.37  |
| ILMN_1658639 | SLC46A3      | 2.60E-03 | -0.41 |
| ILMN_2248970 | OAS2         | 2.61E-03 | -0.28 |
| ILMN_1803279 | TMED5        | 2.62E-03 | 0.31  |
| ILMN_2379718 | RAB24        | 2.62E-03 | -0.35 |
| ILMN_1776327 | LOC727820    | 2.62E-03 | -0.20 |
| ILMN_1740938 | APOE         | 2.62E-03 | -0.31 |
| ILMN_1759933 | MS4A6E       | 2.62E-03 | 0.30  |
| ILMN_1766637 | GLA          | 2.63E-03 | -0.34 |
| ILMN_1795666 | SNX24        | 2.63E-03 | -0.23 |
| ILMN_1755405 | FRAG1        | 2.64E-03 | -0.37 |
| ILMN_1718565 | CDKN1C       | 2.64E-03 | -0.21 |
| ILMN_2101375 | CCDC77       | 2.65E-03 | -0.35 |

|              |              |          |       |
|--------------|--------------|----------|-------|
| ILMN_1673252 | AIMP2        | 2.65E-03 | 0.43  |
| ILMN_1717477 | PSD3         | 2.65E-03 | 0.38  |
| ILMN_2363634 | ADHFE1       | 2.66E-03 | -0.17 |
| ILMN_1807298 | NR4A3        | 2.67E-03 | 0.18  |
| ILMN_2156172 | HK2          | 2.67E-03 | -0.51 |
| ILMN_1730491 | FMNL2        | 2.67E-03 | -0.32 |
| ILMN_1705464 | MRPL41       | 2.67E-03 | 0.31  |
| ILMN_1712708 | TRIM47       | 2.67E-03 | 0.32  |
| ILMN_1761084 | FNDC5        | 2.67E-03 | 0.21  |
| ILMN_1796417 | ASNS         | 2.67E-03 | 0.68  |
| ILMN_1699854 | GRIN3B       | 2.67E-03 | 0.17  |
| ILMN_1775345 | SFRS13B      | 2.67E-03 | 0.14  |
| ILMN_2352121 | NT5C3        | 2.67E-03 | -0.44 |
| ILMN_1764861 | ISOC1        | 2.69E-03 | 0.29  |
| ILMN_2353633 | EMR2         | 2.69E-03 | 0.37  |
| ILMN_1663160 | ZNF337       | 2.70E-03 | -0.21 |
| ILMN_1752520 | SLFN11       | 2.70E-03 | -0.37 |
| ILMN_1665291 | NUB1         | 2.71E-03 | 0.39  |
| ILMN_1766487 | LRRC25       | 2.71E-03 | -0.32 |
| ILMN_2264205 | ZBTB8A       | 2.71E-03 | 0.19  |
| ILMN_2117904 | ZNF22        | 2.72E-03 | -0.32 |
| ILMN_1759787 | THBD         | 2.72E-03 | 0.17  |
| ILMN_1718299 | PDE6G        | 2.73E-03 | 0.19  |
| ILMN_3308265 | MIR302C      | 2.73E-03 | -0.27 |
| ILMN_1775743 | BTG1         | 2.74E-03 | -0.48 |
| ILMN_2401701 | PCGF6        | 2.74E-03 | 0.21  |
| ILMN_1662896 | BRWD2        | 2.75E-03 | -0.33 |
| ILMN_1717636 | RGMA         | 2.76E-03 | -0.19 |
| ILMN_2157075 | LRCH4        | 2.76E-03 | -0.33 |
| ILMN_1664233 | LOC644590    | 2.76E-03 | 0.24  |
| ILMN_1783771 | UBE2Z        | 2.77E-03 | 0.25  |
| ILMN_1735014 | KLF6         | 2.77E-03 | 0.33  |
| ILMN_3244014 | LOC100131967 | 2.77E-03 | -0.28 |
| ILMN_1670353 | RAD51AP1     | 2.77E-03 | -0.38 |
| ILMN_1753790 | ZNF259       | 2.78E-03 | 0.23  |
| ILMN_1782829 | GLTSCR1      | 2.78E-03 | 0.28  |
| ILMN_1749297 | ACTL6A       | 2.78E-03 | 0.32  |
| ILMN_1701731 | AKR1B1       | 2.79E-03 | -0.37 |
| ILMN_1688098 | TBC1D4       | 2.80E-03 | 0.35  |
| ILMN_2394777 | DTNA         | 2.81E-03 | 0.15  |
| ILMN_1658962 | LCP2         | 2.83E-03 | -0.24 |
| ILMN_1659923 | GNAQ         | 2.83E-03 | 0.37  |
| ILMN_1745885 | POLR2F       | 2.83E-03 | -0.34 |
| ILMN_2365549 | BRPF1        | 2.83E-03 | 0.33  |
| ILMN_1758049 | NFIA         | 2.84E-03 | -0.13 |
| ILMN_1706013 | FTHL11       | 2.84E-03 | -0.29 |

|              |           |          |       |
|--------------|-----------|----------|-------|
| ILMN_1808500 | CEP68     | 2.85E-03 | 0.19  |
| ILMN_2349071 | GPR64     | 2.85E-03 | 0.24  |
| ILMN_1707710 | SLC6A13   | 2.85E-03 | -0.15 |
| ILMN_1697817 | PANX1     | 2.85E-03 | -0.25 |
| ILMN_1661799 | HIGD1A    | 2.85E-03 | 0.42  |
| ILMN_1717046 | MOBKL2B   | 2.87E-03 | 0.22  |
| ILMN_1719392 | FH        | 2.87E-03 | 0.31  |
| ILMN_2224833 | ADIPOR2   | 2.87E-03 | -0.34 |
| ILMN_3248352 | CCDC88C   | 2.90E-03 | -0.23 |
| ILMN_2269256 | DNAJC12   | 2.91E-03 | 0.15  |
| ILMN_1664756 | KPNA4     | 2.91E-03 | 0.38  |
| ILMN_2388155 | CASP3     | 2.91E-03 | 0.39  |
| ILMN_2082209 | C20orf100 | 2.91E-03 | -0.57 |
| ILMN_1756506 | CYorf15B  | 2.93E-03 | -0.18 |
| ILMN_3305447 | LOC729898 | 2.93E-03 | -0.17 |
| ILMN_1783621 | CMPK2     | 2.93E-03 | -0.28 |
| ILMN_2094952 | NUAK2     | 2.94E-03 | -0.19 |
| ILMN_2392546 | PAICS     | 2.95E-03 | 0.33  |
| ILMN_3238048 | LOC730324 | 2.95E-03 | -0.23 |
| ILMN_2145280 | DEF6      | 2.95E-03 | -0.35 |
| ILMN_1726666 | GPX3      | 2.95E-03 | -0.59 |
| ILMN_1773427 | KANK1     | 2.95E-03 | -0.26 |
| ILMN_2189027 | LIPG      | 2.96E-03 | 0.24  |
| ILMN_1662970 | ZP3       | 2.97E-03 | -0.28 |
| ILMN_1742798 | SFRS10    | 2.97E-03 | 0.34  |
| ILMN_1687958 | SLC25A22  | 2.97E-03 | 0.24  |
| ILMN_1719343 | WDR26     | 2.97E-03 | -0.33 |
| ILMN_1761450 | DHRS4L2   | 2.98E-03 | -0.25 |
| ILMN_2409062 | ISCU      | 2.98E-03 | -0.32 |
| ILMN_1656826 | SH3RF1    | 2.99E-03 | -0.15 |
| ILMN_1657682 | GFM1      | 2.99E-03 | 0.32  |
| ILMN_1675222 | PLXND1    | 2.99E-03 | -0.37 |
| ILMN_1773470 | ST5       | 2.99E-03 | -0.26 |
| ILMN_1756937 | ST8SIA4   | 3.00E-03 | -0.23 |
| ILMN_2105033 | PLDN      | 3.00E-03 | 0.39  |
| ILMN_1755658 | ABI3      | 3.01E-03 | -0.34 |
| ILMN_1762861 | HLA-F     | 3.02E-03 | -0.35 |
| ILMN_3307926 | ADRBK1    | 3.03E-03 | -0.41 |
| ILMN_1772646 | LOC388681 | 3.03E-03 | -0.30 |
| ILMN_2383455 | SUOX      | 3.06E-03 | 0.29  |
| ILMN_1719649 | TMEM63A   | 3.06E-03 | -0.28 |
| ILMN_1814044 | CABIN1    | 3.06E-03 | 0.27  |
| ILMN_1746864 | PSCDBP    | 3.07E-03 | -0.39 |
| ILMN_1766261 | SLC2A12   | 3.07E-03 | -0.12 |
| ILMN_2330861 | SMC4      | 3.08E-03 | -0.23 |
| ILMN_1726554 | IREB2     | 3.08E-03 | 0.26  |

|              |              |          |       |
|--------------|--------------|----------|-------|
| ILMN_1652913 | EZH2         | 3.09E-03 | 0.16  |
| ILMN_1671250 | CLIC4        | 3.09E-03 | 0.32  |
| ILMN_3238213 | KILLIN       | 3.09E-03 | -0.40 |
| ILMN_1781045 | FXVD2        | 3.12E-03 | -0.22 |
| ILMN_1670079 | OMA1         | 3.12E-03 | -0.27 |
| ILMN_1657515 | RPS6KA5      | 3.13E-03 | -0.17 |
| ILMN_2169761 | CPNE8        | 3.13E-03 | -0.33 |
| ILMN_1663042 | SDC4         | 3.13E-03 | 0.34  |
| ILMN_2124187 | TSC22D2      | 3.14E-03 | 0.37  |
| ILMN_1735347 | MCEE         | 3.15E-03 | -0.30 |
| ILMN_1673455 | RASAL2       | 3.15E-03 | 0.23  |
| ILMN_1800276 | RCN1         | 3.15E-03 | 0.34  |
| ILMN_1732577 | TMEM216      | 3.16E-03 | -0.32 |
| ILMN_1671257 | DKC1         | 3.16E-03 | 0.30  |
| ILMN_1752249 | FAM38A       | 3.17E-03 | 0.35  |
| ILMN_1842850 |              | 3.17E-03 | 0.44  |
| ILMN_2117987 | TFDP1        | 3.19E-03 | -0.35 |
| ILMN_1705594 | NAT10        | 3.20E-03 | 0.31  |
| ILMN_2092441 | LRP12        | 3.21E-03 | 0.16  |
| ILMN_1738883 | RNF135       | 3.21E-03 | -0.29 |
| ILMN_1707339 | BTG3         | 3.22E-03 | 0.30  |
| ILMN_3216336 | LOC285741    | 3.22E-03 | -0.31 |
| ILMN_1674983 | LOC387841    | 3.23E-03 | -0.38 |
| ILMN_1791423 | LOC401052    | 3.24E-03 | -0.18 |
| ILMN_1810953 | LOC653496    | 3.25E-03 | -0.24 |
| ILMN_1814998 | FKSG30       | 3.25E-03 | 0.47  |
| ILMN_1775759 | NRAS         | 3.25E-03 | 0.22  |
| ILMN_2380771 | AKR1A1       | 3.28E-03 | -0.38 |
| ILMN_1861091 |              | 3.28E-03 | 0.22  |
| ILMN_1652580 | POLD1        | 3.29E-03 | 0.26  |
| ILMN_1790978 | ATG7         | 3.30E-03 | -0.38 |
| ILMN_1793002 | C20orf196    | 3.30E-03 | -0.18 |
| ILMN_1781085 | BRDG1        | 3.32E-03 | -0.20 |
| ILMN_1726266 | ADAM12       | 3.32E-03 | 0.39  |
| ILMN_2349061 | IRF7         | 3.32E-03 | -0.22 |
| ILMN_1784871 | FASN         | 3.33E-03 | -0.40 |
| ILMN_1739032 | TMEM70       | 3.35E-03 | 0.27  |
| ILMN_3305938 | SGK1         | 3.36E-03 | -0.39 |
| ILMN_1701006 | HEXIM2       | 3.36E-03 | -0.20 |
| ILMN_3243291 | LOC100133372 | 3.36E-03 | 0.40  |
| ILMN_1680770 | UBQLN2       | 3.36E-03 | -0.34 |
| ILMN_3275696 | LOC100131940 | 3.36E-03 | 0.35  |
| ILMN_1741356 | PRICKLE1     | 3.37E-03 | -0.16 |
| ILMN_1684982 | PDK4         | 3.38E-03 | -0.43 |
| ILMN_1715416 | NUP188       | 3.38E-03 | 0.20  |
| ILMN_1785177 | DNAJC14      | 3.38E-03 | -0.22 |

|              |           |          |       |
|--------------|-----------|----------|-------|
| ILMN_1737426 | PCMTD1    | 3.38E-03 | -0.33 |
| ILMN_1684402 | STXBP5    | 3.38E-03 | -0.25 |
| ILMN_1669273 | PPT1      | 3.40E-03 | 0.29  |
| ILMN_1789364 | ZNF789    | 3.41E-03 | 0.19  |
| ILMN_1780036 | WDR1      | 3.42E-03 | 0.32  |
| ILMN_1797298 | ARMC7     | 3.43E-03 | -0.22 |
| ILMN_1733155 | GIT1      | 3.43E-03 | 0.25  |
| ILMN_1761490 | ZNF75D    | 3.43E-03 | -0.30 |
| ILMN_2388701 | ST3GAL5   | 3.44E-03 | 0.37  |
| ILMN_1799104 | SPAG9     | 3.44E-03 | 0.41  |
| ILMN_1785831 | ZDHHC13   | 3.45E-03 | 0.18  |
| ILMN_1677963 | TMCC1     | 3.45E-03 | -0.17 |
| ILMN_1787628 | NOP56     | 3.45E-03 | 0.33  |
| ILMN_3248764 | KIAA1908  | 3.45E-03 | 0.27  |
| ILMN_2318725 | EEF1B2    | 3.47E-03 | 0.37  |
| ILMN_1813568 | TRPV1     | 3.48E-03 | 0.12  |
| ILMN_1675191 | GAPT      | 3.50E-03 | -0.96 |
| ILMN_1656361 | LOC201175 | 3.50E-03 | 0.26  |
| ILMN_2207504 | LEP       | 3.50E-03 | -0.14 |
| ILMN_1769388 | GJB2      | 3.50E-03 | -0.61 |
| ILMN_2375418 | DPH2      | 3.51E-03 | 0.29  |
| ILMN_1814022 | NR1H3     | 3.51E-03 | -0.48 |
| ILMN_2413527 | VCL       | 3.52E-03 | 0.21  |
| ILMN_1815445 | IDS       | 3.55E-03 | -0.27 |
| ILMN_1760315 | VWCE      | 3.55E-03 | 0.42  |
| ILMN_1725981 | LOC654189 | 3.55E-03 | 0.16  |
| ILMN_2109197 | EPB41L3   | 3.55E-03 | -0.33 |
| ILMN_1801584 | CXCR4     | 3.57E-03 | 0.53  |
| ILMN_1742521 | GRB2      | 3.57E-03 | -0.40 |
| ILMN_2280135 | P4HA2     | 3.57E-03 | 0.14  |
| ILMN_1755303 | ZNF217    | 3.58E-03 | 0.42  |
| ILMN_1681067 | PIK3R5    | 3.58E-03 | 0.18  |
| ILMN_3293146 | LOC642975 | 3.58E-03 | -0.32 |
| ILMN_1795778 | P4HA2     | 3.59E-03 | 0.35  |
| ILMN_2400030 | PTPN2     | 3.60E-03 | 0.29  |
| ILMN_2155228 | CRLF3     | 3.60E-03 | -0.37 |
| ILMN_2205882 | NSUN7     | 3.61E-03 | -0.15 |
| ILMN_1706342 | ZNF746    | 3.61E-03 | -0.29 |
| ILMN_1743357 | XPNPEP2   | 3.63E-03 | 0.13  |
| ILMN_2108339 | THUMPD1   | 3.64E-03 | -0.29 |
| ILMN_2262901 | RUFY3     | 3.65E-03 | 0.34  |
| ILMN_1806651 | PARP8     | 3.65E-03 | -0.25 |
| ILMN_1695034 | LOC642817 | 3.65E-03 | 0.37  |
| ILMN_1685824 | B4GALT5   | 3.66E-03 | -0.42 |
| ILMN_1672080 | NR2F6     | 3.66E-03 | 0.20  |
| ILMN_1735955 | LOC644033 | 3.67E-03 | -0.32 |

|              |            |          |       |
|--------------|------------|----------|-------|
| ILMN_2372082 | SNRPN      | 3.67E-03 | -0.34 |
| ILMN_1694479 | WDR18      | 3.67E-03 | 0.29  |
| ILMN_1676358 | RALB       | 3.67E-03 | 0.40  |
| ILMN_1704713 | CSNK1G1    | 3.69E-03 | 0.40  |
| ILMN_1793729 | C15orf39   | 3.70E-03 | -0.24 |
| ILMN_1727740 | SYNCRIP    | 3.71E-03 | 0.32  |
| ILMN_1753111 | NAMPT      | 3.72E-03 | -0.31 |
| ILMN_2229839 | RAP2B      | 3.75E-03 | -0.14 |
| ILMN_1656670 | HLA-G      | 3.76E-03 | -0.36 |
| ILMN_3243471 | CNPY2      | 3.77E-03 | -0.33 |
| ILMN_1679912 | DPH3       | 3.78E-03 | 0.30  |
| ILMN_2381296 | GSTZ1      | 3.79E-03 | -0.26 |
| ILMN_1671392 | KCNF1      | 3.79E-03 | -0.27 |
| ILMN_2220283 | HNRPA1L-2  | 3.80E-03 | 0.29  |
| ILMN_2223350 | C13orf1    | 3.82E-03 | 0.21  |
| ILMN_2163819 | KIF21B     | 3.83E-03 | -0.15 |
| ILMN_1668498 | CWF19L2    | 3.83E-03 | -0.25 |
| ILMN_2105308 | DPM1       | 3.83E-03 | 0.32  |
| ILMN_1796712 | S100A10    | 3.84E-03 | -0.37 |
| ILMN_1828584 |            | 3.84E-03 | 0.15  |
| ILMN_1745499 | UXT        | 3.84E-03 | 0.23  |
| ILMN_1763688 | C17orf49   | 3.87E-03 | -0.28 |
| ILMN_1735548 | HIVEP1     | 3.89E-03 | -0.19 |
| ILMN_3248551 | C2CD4B     | 3.90E-03 | 0.15  |
| ILMN_1675501 | SENP5      | 3.90E-03 | 0.25  |
| ILMN_2402936 | LOC440926  | 3.91E-03 | -0.33 |
| ILMN_2115752 | MEFV       | 3.92E-03 | -0.24 |
| ILMN_1705737 | IMPDH2     | 3.94E-03 | 0.32  |
| ILMN_1742230 | BAZ1A      | 3.95E-03 | 0.34  |
| ILMN_1802706 | IDH3G      | 3.95E-03 | 0.27  |
| ILMN_2198185 | CXorf12    | 3.95E-03 | -0.31 |
| ILMN_2079386 | RPL22      | 3.95E-03 | 0.35  |
| ILMN_1675656 | PPFIBP2    | 3.98E-03 | 0.34  |
| ILMN_1708709 | KIAA1211   | 3.98E-03 | 0.14  |
| ILMN_1723962 | LXN        | 3.99E-03 | -0.35 |
| ILMN_1692938 | PSAT1      | 3.99E-03 | 0.71  |
| ILMN_1774836 | PLOD3      | 3.99E-03 | 0.31  |
| ILMN_1659047 | HIST2H2AA3 | 4.00E-03 | -0.40 |
| ILMN_2152429 | C12orf76   | 4.00E-03 | 0.41  |
| ILMN_2272967 | TRAPPC6B   | 4.00E-03 | 0.19  |
| ILMN_2144574 | CTBS       | 4.01E-03 | -0.31 |
| ILMN_2046896 | ESRRAP2    | 4.02E-03 | 0.29  |
| ILMN_2279635 | EIF4G2     | 4.03E-03 | 0.31  |
| ILMN_1693830 | LACTB      | 4.03E-03 | 0.24  |
| ILMN_1712347 | LOC644422  | 4.05E-03 | 0.35  |
| ILMN_1752333 | SLC35E1    | 4.05E-03 | 0.25  |

|              |              |          |       |
|--------------|--------------|----------|-------|
| ILMN_1667232 | KIR2DL3      | 4.06E-03 | -0.31 |
| ILMN_1705107 | SDCBP2       | 4.06E-03 | 0.11  |
| ILMN_1673138 | ZBTB33       | 4.06E-03 | 0.30  |
| ILMN_1757604 | TPM2         | 4.06E-03 | 0.28  |
| ILMN_1785732 | TNFAIP6      | 4.08E-03 | -0.69 |
| ILMN_3220934 | NCRNA00152   | 4.09E-03 | 0.22  |
| ILMN_2364376 | ILK          | 4.09E-03 | -0.31 |
| ILMN_1653324 | IL22RA2      | 4.10E-03 | 0.12  |
| ILMN_1786176 | CD37         | 4.11E-03 | -0.34 |
| ILMN_1669210 | SNORD16      | 4.15E-03 | 0.16  |
| ILMN_1670302 | HK3          | 4.16E-03 | -0.41 |
| ILMN_1683755 | SOX13        | 4.17E-03 | -0.29 |
| ILMN_1665823 | LOC389787    | 4.17E-03 | -0.38 |
| ILMN_1665483 | KIAA0020     | 4.18E-03 | 0.37  |
| ILMN_1701854 | GNG5         | 4.18E-03 | 0.30  |
| ILMN_3246910 | LOC100190986 | 4.18E-03 | 0.30  |
| ILMN_1810085 | ABCF3        | 4.18E-03 | 0.20  |
| ILMN_1683747 | CD276        | 4.18E-03 | 0.25  |
| ILMN_1702835 | SH3BGR1      | 4.18E-03 | -0.37 |
| ILMN_3227811 | LOC729423    | 4.20E-03 | 0.25  |
| ILMN_2044085 | RQCD1        | 4.20E-03 | 0.33  |
| ILMN_2311537 | HMGA1        | 4.20E-03 | 0.25  |
| ILMN_1652378 | IPO7         | 4.21E-03 | 0.21  |
| ILMN_2229242 | LSM3         | 4.21E-03 | -0.32 |
| ILMN_1786444 | LPL          | 4.21E-03 | 0.38  |
| ILMN_1721136 | H6PD         | 4.21E-03 | 0.28  |
| ILMN_1878029 |              | 4.22E-03 | -0.21 |
| ILMN_1675803 | LOC285550    | 4.22E-03 | -0.24 |
| ILMN_2136971 | FABP3        | 4.22E-03 | 0.28  |
| ILMN_1715947 | LOC648210    | 4.23E-03 | 0.45  |
| ILMN_2156982 | IMP4         | 4.25E-03 | 0.36  |
| ILMN_2180677 | ARMCX1       | 4.27E-03 | -0.38 |
| ILMN_1661109 | ATF3         | 4.27E-03 | 0.79  |
| ILMN_1660844 | INTS4        | 4.27E-03 | -0.27 |
| ILMN_1761912 | MGAT1        | 4.27E-03 | 0.32  |
| ILMN_1774062 | SLC25A5      | 4.28E-03 | 0.32  |
| ILMN_1715879 | CRYBB1       | 4.29E-03 | -0.15 |
| ILMN_1756578 | CHRNA6       | 4.31E-03 | -0.12 |
| ILMN_1794825 | ALDH3A2      | 4.31E-03 | -0.35 |
| ILMN_2113333 | LGALS9B      | 4.31E-03 | 0.25  |
| ILMN_1794165 | PGD          | 4.31E-03 | -0.32 |
| ILMN_1784532 | COL22A1      | 4.33E-03 | 0.46  |
| ILMN_1769926 | DBN1         | 4.34E-03 | 0.30  |
| ILMN_2278433 | LOC285074    | 4.34E-03 | -0.28 |
| ILMN_2191929 | C9orf6       | 4.34E-03 | -0.26 |
| ILMN_2072603 | MRPL14       | 4.34E-03 | 0.31  |



|              |           |          |       |
|--------------|-----------|----------|-------|
| ILMN_1789011 | SYNGR2    | 4.34E-03 | 0.19  |
| ILMN_1674385 | YWHAQ     | 4.34E-03 | 0.33  |
| ILMN_1700306 | OCIAD2    | 4.34E-03 | -0.27 |
| ILMN_1806408 | ACADVL    | 4.34E-03 | 0.36  |
| ILMN_2393461 | DDO       | 4.35E-03 | 0.15  |
| ILMN_1854833 |           | 4.37E-03 | -0.29 |
| ILMN_1810584 | IL1R1     | 4.37E-03 | 0.27  |
| ILMN_1653292 | PFKFB4    | 4.42E-03 | 0.39  |
| ILMN_1804328 | WWP1      | 4.42E-03 | -0.29 |
| ILMN_1780058 | DEGS1     | 4.42E-03 | -0.35 |
| ILMN_1685625 | UCP2      | 4.44E-03 | 0.44  |
| ILMN_2367215 | PRCP      | 4.45E-03 | -0.33 |
| ILMN_1697594 | ANKRD28   | 4.45E-03 | -0.15 |
| ILMN_3297996 | LOC728732 | 4.45E-03 | 0.36  |
| ILMN_1782741 | CD300LB   | 4.46E-03 | 0.32  |
| ILMN_1655117 | WDR19     | 4.46E-03 | -0.27 |
| ILMN_1756501 | ST6GAL1   | 4.46E-03 | 0.32  |
| ILMN_1691264 | NAT8B     | 4.46E-03 | -0.35 |
| ILMN_1687724 | RAP1GDS1  | 4.46E-03 | 0.16  |
| ILMN_2170353 | PTPLB     | 4.47E-03 | 0.34  |
| ILMN_1690586 | HNRPA1P4  | 4.47E-03 | 0.35  |
| ILMN_1762713 | C19orf59  | 4.47E-03 | -0.44 |
| ILMN_1699015 | H3F3A     | 4.48E-03 | -0.38 |
| ILMN_1786016 | CHD1L     | 4.50E-03 | 0.47  |
| ILMN_1656254 | NOTCH2NL  | 4.50E-03 | -0.31 |
| ILMN_1807211 | NICN1     | 4.52E-03 | -0.31 |
| ILMN_1717357 | AIFM1     | 4.53E-03 | 0.25  |
| ILMN_1775692 | EIF4G3    | 4.53E-03 | -0.28 |
| ILMN_1700024 | UST       | 4.53E-03 | 0.15  |
| ILMN_1674593 | SIGLEC11  | 4.54E-03 | -0.20 |
| ILMN_1759495 | XPO5      | 4.54E-03 | 0.23  |
| ILMN_1745385 | HNRPM     | 4.57E-03 | 0.32  |
| ILMN_2408543 | PLAUR     | 4.57E-03 | -0.56 |
| ILMN_2352042 | MRPL4     | 4.59E-03 | 0.22  |
| ILMN_1746012 | MBD6      | 4.59E-03 | -0.27 |
| ILMN_1714599 | CAMLG     | 4.61E-03 | -0.31 |
| ILMN_1691508 | PLAUR     | 4.61E-03 | -0.36 |
| ILMN_1750101 | S100A11   | 4.61E-03 | -0.32 |
| ILMN_1777895 | LRRRC37B  | 4.61E-03 | 0.35  |
| ILMN_1852022 | KIAA1881  | 4.61E-03 | 0.21  |
| ILMN_1806320 | PPFIBP1   | 4.61E-03 | 0.13  |
| ILMN_2043109 | TOP1P2    | 4.62E-03 | 0.24  |
| ILMN_1780533 | RNASE6    | 4.63E-03 | -0.48 |
| ILMN_2381476 | SPG3A     | 4.63E-03 | 0.27  |
| ILMN_1865764 |           | 4.64E-03 | -0.31 |
| ILMN_1745079 | TRIM2     | 4.65E-03 | -0.12 |

|              |           |          |       |
|--------------|-----------|----------|-------|
| ILMN_1728471 | ARFGEF1   | 4.65E-03 | 0.28  |
| ILMN_1757388 | OCEL1     | 4.65E-03 | -0.27 |
| ILMN_3229033 | LOC732360 | 4.65E-03 | 0.22  |
| ILMN_1686562 | KIF13B    | 4.66E-03 | -0.33 |
| ILMN_1781416 | FRAT1     | 4.69E-03 | -0.21 |
| ILMN_3210917 | LOC389168 | 4.69E-03 | 0.34  |
| ILMN_1693826 | HAVCR2    | 4.69E-03 | 0.31  |
| ILMN_1670844 | OPN3      | 4.70E-03 | 0.22  |
| ILMN_1802082 | PRDM8     | 4.71E-03 | -0.15 |
| ILMN_1803464 | PHTF1     | 4.72E-03 | -0.30 |
| ILMN_1789007 | APOC1     | 4.73E-03 | -0.33 |
| ILMN_1819384 |           | 4.73E-03 | 0.12  |
| ILMN_3200921 | LOC642590 | 4.74E-03 | -0.31 |
| ILMN_1786789 | FAM102B   | 4.76E-03 | -0.26 |
| ILMN_3290211 | LOC644761 | 4.76E-03 | 0.27  |
| ILMN_1720604 | ARSG      | 4.77E-03 | -0.16 |
| ILMN_2366246 | SEC23B    | 4.78E-03 | 0.32  |
| ILMN_2252408 | CNPY4     | 4.78E-03 | -0.18 |
| ILMN_1773018 | CUEDC2    | 4.78E-03 | -0.31 |
| ILMN_2363668 | YIF1B     | 4.78E-03 | 0.33  |
| ILMN_2352190 | CLIP2     | 4.79E-03 | -0.21 |
| ILMN_1916292 |           | 4.80E-03 | -0.17 |
| ILMN_3261811 | C14orf167 | 4.80E-03 | -0.22 |
| ILMN_3247998 | STAP1     | 4.80E-03 | -0.26 |
| ILMN_1780825 | RRAS      | 4.81E-03 | -0.30 |
| ILMN_2282641 | TBXAS1    | 4.81E-03 | -0.34 |
| ILMN_1859127 |           | 4.82E-03 | 0.16  |
| ILMN_1809477 | CARHSP1   | 4.82E-03 | -0.37 |
| ILMN_1659682 | GALK2     | 4.82E-03 | 0.31  |
| ILMN_1691339 | CLEC1A    | 4.84E-03 | 0.19  |
| ILMN_1770692 | WDR12     | 4.85E-03 | 0.38  |
| ILMN_1678170 | MME       | 4.85E-03 | 0.18  |
| ILMN_2378952 | GPX4      | 4.85E-03 | 0.32  |
| ILMN_1746525 | FTHL2     | 4.85E-03 | -0.32 |
| ILMN_1770290 | CNN2      | 4.85E-03 | 0.40  |
| ILMN_3242271 | GAPT      | 4.86E-03 | -0.58 |
| ILMN_2378081 | BCL7A     | 4.88E-03 | 0.11  |
| ILMN_1681367 | ZNF642    | 4.92E-03 | 0.15  |
| ILMN_1687858 | CALM2     | 4.92E-03 | 0.27  |
| ILMN_1685781 | C14orf142 | 4.93E-03 | -0.35 |
| ILMN_1675387 | LIMS1     | 4.94E-03 | 0.37  |
| ILMN_2235851 | LINCR     | 4.94E-03 | 0.33  |
| ILMN_2378100 | FBXL5     | 4.95E-03 | -0.39 |
| ILMN_1683700 | TNFSF12   | 4.96E-03 | -0.32 |
| ILMN_2080158 | FAM10A7   | 4.97E-03 | 0.25  |
| ILMN_1803739 | RPGRIP1   | 5.02E-03 | -0.18 |

|              |           |          |       |
|--------------|-----------|----------|-------|
| ILMN_1670145 | DFNA5     | 5.03E-03 | -0.33 |
| ILMN_2184640 | NOLC1     | 5.04E-03 | 0.16  |
| ILMN_1785393 | ADAM12    | 5.05E-03 | 0.13  |
| ILMN_1735737 | SLC11A1   | 5.06E-03 | -0.12 |
| ILMN_2328094 | DACT1     | 5.06E-03 | 0.49  |
| ILMN_1661717 | TFDP1     | 5.06E-03 | -0.32 |
| ILMN_2386891 | GLT8D1    | 5.07E-03 | -0.23 |
| ILMN_1669046 | FOXQ1     | 5.08E-03 | 1.72  |
| ILMN_1750785 | SYTL1     | 5.08E-03 | 0.14  |
| ILMN_3271092 | KLRAQ1    | 5.09E-03 | -0.33 |
| ILMN_1753712 | STX10     | 5.10E-03 | -0.40 |
| ILMN_1651966 | FGFR3     | 5.10E-03 | 0.14  |
| ILMN_1651544 | HDAC8     | 5.13E-03 | -0.16 |
| ILMN_1746403 | GTF2IRD2P | 5.13E-03 | -0.13 |
| ILMN_1689800 | MRTO4     | 5.13E-03 | 0.30  |
| ILMN_1721605 | SMYD2     | 5.13E-03 | -0.27 |
| ILMN_1727194 | CALU      | 5.14E-03 | 0.34  |
| ILMN_1718936 | LST1      | 5.14E-03 | -0.28 |
| ILMN_3245331 | DHRS4L1   | 5.15E-03 | -0.18 |
| ILMN_1710482 | APLP2     | 5.15E-03 | -0.32 |
| ILMN_3289745 | LOC339352 | 5.15E-03 | -0.24 |
| ILMN_1678087 | MAP3K4    | 5.19E-03 | 0.30  |
| ILMN_2305544 | DBI       | 5.19E-03 | -0.30 |
| ILMN_1789266 | CCDC25    | 5.19E-03 | -0.33 |
| ILMN_1711157 | NOTCH4    | 5.20E-03 | -0.12 |
| ILMN_1748983 | RTN4      | 5.20E-03 | -0.13 |
| ILMN_1658830 | C10orf26  | 5.21E-03 | -0.26 |
| ILMN_1800958 | ALS2CR4   | 5.22E-03 | -0.24 |
| ILMN_2125747 | LOC606724 | 5.22E-03 | -0.41 |
| ILMN_1717366 | MDFIC     | 5.22E-03 | -0.33 |
| ILMN_1736814 | CLNS1A    | 5.28E-03 | 0.28  |
| ILMN_2364529 | EZH2      | 5.28E-03 | 0.15  |
| ILMN_1885728 | KIAA1147  | 5.29E-03 | -0.19 |
| ILMN_1705302 | FCGRT     | 5.29E-03 | -0.38 |
| ILMN_2053178 | ACTG1     | 5.29E-03 | 0.30  |
| ILMN_1733998 | DHRS9     | 5.30E-03 | -0.45 |
| ILMN_1804207 | MRPL4     | 5.32E-03 | 0.14  |
| ILMN_1897741 |           | 5.33E-03 | -0.34 |
| ILMN_1657870 | ABL2      | 5.34E-03 | 0.13  |
| ILMN_2203271 | FPR3      | 5.35E-03 | -0.37 |
| ILMN_1803925 | MTMR3     | 5.35E-03 | -0.18 |
| ILMN_1699253 | LOC729317 | 5.35E-03 | 0.31  |
| ILMN_1724181 | IL15      | 5.35E-03 | -0.25 |
| ILMN_2109416 | NAPSB     | 5.37E-03 | -0.55 |
| ILMN_1659099 | ROCK2     | 5.37E-03 | 0.23  |
| ILMN_2223941 | FBLN5     | 5.39E-03 | -0.33 |

|              |              |          |       |
|--------------|--------------|----------|-------|
| ILMN_1679268 | PELI1        | 5.41E-03 | -0.23 |
| ILMN_2084073 | UCN          | 5.41E-03 | -0.22 |
| ILMN_1891455 |              | 5.44E-03 | 0.21  |
| ILMN_1765401 | RRN3         | 5.45E-03 | 0.28  |
| ILMN_1706015 | FAM43A       | 5.45E-03 | -0.18 |
| ILMN_1790471 | CICE         | 5.47E-03 | 0.30  |
| ILMN_2347917 | EED          | 5.48E-03 | 0.24  |
| ILMN_1844408 | PLXNA2       | 5.49E-03 | 0.14  |
| ILMN_1673529 | AGXT2L2      | 5.49E-03 | -0.25 |
| ILMN_2375825 | CD37         | 5.49E-03 | -0.33 |
| ILMN_1679093 | ZNF581       | 5.50E-03 | -0.27 |
| ILMN_2351611 | UBQLN1       | 5.51E-03 | 0.27  |
| ILMN_2414399 | NME1         | 5.52E-03 | 0.17  |
| ILMN_1766713 | HSPD1        | 5.52E-03 | 0.45  |
| ILMN_3307782 | FBXL18       | 5.53E-03 | -0.27 |
| ILMN_1746257 | DAZAP1       | 5.54E-03 | 0.21  |
| ILMN_2228873 | STARD3NL     | 5.54E-03 | -0.28 |
| ILMN_1887174 | KIAA0146     | 5.57E-03 | -0.26 |
| ILMN_1714159 | LUZP1        | 5.57E-03 | 0.32  |
| ILMN_1666178 | TP53I13      | 5.60E-03 | 0.29  |
| ILMN_1691539 | LAT          | 5.61E-03 | -0.36 |
| ILMN_3193687 | LOC100129391 | 5.61E-03 | 0.37  |
| ILMN_1708110 | TMEM144      | 5.65E-03 | -0.34 |
| ILMN_1795118 | SIDT1        | 5.65E-03 | -0.11 |
| ILMN_1718334 | ITPA         | 5.66E-03 | 0.32  |
| ILMN_1739840 | LRRRC8A      | 5.68E-03 | 0.23  |
| ILMN_1740819 | STARD7       | 5.69E-03 | 0.32  |
| ILMN_1653001 | CABLES1      | 5.71E-03 | -0.32 |
| ILMN_1770030 | C7orf43      | 5.71E-03 | 0.22  |
| ILMN_1793384 | JAK1         | 5.72E-03 | 0.30  |
| ILMN_3248773 | C7orf40      | 5.72E-03 | 0.26  |
| ILMN_1795905 | ZBTB4        | 5.77E-03 | -0.21 |
| ILMN_1712929 | DNAJB12      | 5.80E-03 | 0.24  |
| ILMN_1775734 | SH2D3C       | 5.81E-03 | -0.24 |
| ILMN_1731596 | AP3S2        | 5.81E-03 | -0.26 |
| ILMN_2258004 | METRNL       | 5.82E-03 | 0.22  |
| ILMN_1688672 | SIGLECP3     | 5.82E-03 | 0.18  |
| ILMN_1758626 | IDS          | 5.83E-03 | -0.29 |
| ILMN_1716988 | OPN3         | 5.83E-03 | 0.40  |
| ILMN_1787897 | CXCL1        | 5.84E-03 | -0.36 |
| ILMN_2115974 | GSDM1        | 5.84E-03 | -0.47 |
| ILMN_2062468 | IGFBP7       | 5.84E-03 | -0.24 |
| ILMN_1768391 | ARL4C        | 5.84E-03 | 0.24  |
| ILMN_1796397 | CISD2        | 5.84E-03 | -0.29 |
| ILMN_2135756 | HSF2BP       | 5.84E-03 | -0.14 |
| ILMN_1672547 | MYO9B        | 5.85E-03 | -0.35 |

|              |           |          |       |
|--------------|-----------|----------|-------|
| ILMN_2398995 | MRPL24    | 5.85E-03 | 0.22  |
| ILMN_1673563 | LOC143941 | 5.85E-03 | 0.11  |
| ILMN_1755732 | ARMC9     | 5.85E-03 | -0.24 |
| ILMN_1800131 | LOC652826 | 5.85E-03 | 0.24  |
| ILMN_1732873 | IPPK      | 5.86E-03 | 0.13  |
| ILMN_1775542 | FAIM3     | 5.87E-03 | -0.49 |
| ILMN_1658800 | BRPF3     | 5.91E-03 | -0.30 |
| ILMN_3272768 | HSPC157   | 5.93E-03 | -0.21 |
| ILMN_1795181 | DDX60     | 5.93E-03 | -0.27 |
| ILMN_2363065 | RTN3      | 5.95E-03 | -0.31 |
| ILMN_1716859 | TDO2      | 5.97E-03 | -0.32 |
| ILMN_1785061 | EPHB2     | 5.97E-03 | -0.15 |
| ILMN_2172755 | DEPDC6    | 5.98E-03 | -0.15 |
| ILMN_1658702 | HIST1H2BJ | 5.98E-03 | -0.27 |
| ILMN_2096719 | GRK5      | 5.99E-03 | -0.25 |
| ILMN_3305273 | LOC729779 | 5.99E-03 | 0.63  |
| ILMN_1807925 | GNG2      | 6.03E-03 | -0.20 |
| ILMN_1736180 | FRAT1     | 6.03E-03 | -0.15 |
| ILMN_1677946 | LOC653764 | 6.03E-03 | 0.20  |
| ILMN_2075334 | HIST1H4C  | 6.08E-03 | -0.32 |
| ILMN_1708105 | EZH2      | 6.08E-03 | 0.20  |
| ILMN_1683415 | CAMK2D    | 6.09E-03 | 0.16  |
| ILMN_1813489 | RAF1      | 6.09E-03 | -0.28 |
| ILMN_1662932 | LCP1      | 6.11E-03 | 0.28  |
| ILMN_1676629 | INSIG2    | 6.11E-03 | 0.31  |
| ILMN_2402272 | TCEAL8    | 6.11E-03 | -0.27 |
| ILMN_1750409 | RAB9A     | 6.11E-03 | -0.31 |
| ILMN_1882495 |           | 6.14E-03 | 0.11  |
| ILMN_2288483 | C3orf34   | 6.14E-03 | 0.29  |
| ILMN_1772132 | ATP5B     | 6.15E-03 | 0.26  |
| ILMN_1685810 | NFATC3    | 6.19E-03 | 0.13  |
| ILMN_1667043 | EIF4A3    | 6.20E-03 | 0.35  |
| ILMN_2366463 | FN1       | 6.21E-03 | 0.19  |
| ILMN_1788223 | RSPH3     | 6.22E-03 | 0.44  |
| ILMN_1760027 | WAS       | 6.23E-03 | -0.35 |
| ILMN_1667374 | C14orf149 | 6.23E-03 | 0.20  |
| ILMN_1748694 | NHSL2     | 6.23E-03 | -0.13 |
| ILMN_3244521 | LOC283267 | 6.24E-03 | -0.25 |
| ILMN_1882354 |           | 6.24E-03 | -0.18 |
| ILMN_3277872 | LOC644684 | 6.25E-03 | 0.27  |
| ILMN_2077733 | C12orf30  | 6.25E-03 | 0.13  |
| ILMN_1771139 | FBXO31    | 6.26E-03 | 0.22  |
| ILMN_1657148 | C19orf23  | 6.28E-03 | 0.19  |
| ILMN_3274596 | LOC286512 | 6.28E-03 | -0.33 |
| ILMN_2359453 | ERGIC3    | 6.29E-03 | -0.33 |
| ILMN_1695719 | EIF2C2    | 6.29E-03 | 0.31  |

|              |              |          |       |
|--------------|--------------|----------|-------|
| ILMN_1652540 | RELL2        | 6.31E-03 | 0.14  |
| ILMN_1808587 | ZFH3         | 6.31E-03 | -0.30 |
| ILMN_1730931 | RUFY3        | 6.32E-03 | 0.19  |
| ILMN_1779979 | SLC37A3      | 6.33E-03 | 0.13  |
| ILMN_2320349 | BACE1        | 6.33E-03 | 0.28  |
| ILMN_1746408 | MIDN         | 6.33E-03 | 0.32  |
| ILMN_1772387 | TLR2         | 6.34E-03 | -0.23 |
| ILMN_1676014 | LOC728635    | 6.34E-03 | -0.33 |
| ILMN_1663390 | CDC20        | 6.35E-03 | 0.18  |
| ILMN_1779735 | C7orf59      | 6.36E-03 | -0.27 |
| ILMN_1722532 | JMJD1A       | 6.37E-03 | -0.27 |
| ILMN_1720113 | PTPRO        | 6.37E-03 | 0.35  |
| ILMN_1728168 | C20orf45     | 6.41E-03 | 0.27  |
| ILMN_2240003 | ABL2         | 6.42E-03 | 0.11  |
| ILMN_1804568 | HOMER1       | 6.42E-03 | 0.10  |
| ILMN_3236036 | LOC283663    | 6.43E-03 | -0.16 |
| ILMN_1810127 | ZNF789       | 6.44E-03 | 0.17  |
| ILMN_3224126 | LOC729222    | 6.44E-03 | 0.17  |
| ILMN_1666545 | GCNT1        | 6.50E-03 | -0.34 |
| ILMN_3195372 | LOC100128056 | 6.50E-03 | -0.19 |
| ILMN_1687947 | HIST1H2BE    | 6.51E-03 | -0.28 |
| ILMN_1694174 | TRIM68       | 6.51E-03 | -0.25 |
| ILMN_2069128 | EPB41L2      | 6.52E-03 | 0.23  |
| ILMN_1777139 | MAK16        | 6.52E-03 | 0.28  |
| ILMN_3245403 | LOC100133931 | 6.52E-03 | -0.34 |
| ILMN_2097793 | ZBTB4        | 6.54E-03 | -0.28 |
| ILMN_2336133 | SULT1A4      | 6.56E-03 | -0.31 |
| ILMN_3305378 | LOC729839    | 6.56E-03 | -0.16 |
| ILMN_1657446 | C1orf57      | 6.56E-03 | -0.23 |
| ILMN_1745343 | ZMAT2        | 6.58E-03 | -0.24 |
| ILMN_1789244 | SOX8         | 6.61E-03 | 0.12  |
| ILMN_1677572 | FSD1CL       | 6.61E-03 | -0.16 |
| ILMN_1659524 | C6orf66      | 6.62E-03 | 0.31  |
| ILMN_1812856 | ZSWIM1       | 6.62E-03 | -0.27 |
| ILMN_1811767 | INHBE        | 6.64E-03 | 1.27  |
| ILMN_1806483 | ZWILCH       | 6.69E-03 | 0.11  |
| ILMN_1750088 | VRK2         | 6.70E-03 | -0.30 |
| ILMN_1753249 | DDX10        | 6.71E-03 | 0.22  |
| ILMN_1767113 | AOX1         | 6.74E-03 | -0.10 |
| ILMN_2150894 | ALDH1B1      | 6.75E-03 | 0.17  |
| ILMN_2354649 | SFRS13A      | 6.76E-03 | 0.22  |
| ILMN_1728236 | SLFN12       | 6.76E-03 | -0.21 |
| ILMN_2103720 | MRPL15       | 6.77E-03 | 0.33  |
| ILMN_1710495 | PAPLN        | 6.77E-03 | -0.28 |
| ILMN_1680591 | RTKN         | 6.81E-03 | 0.32  |
| ILMN_1678957 | WDR55        | 6.81E-03 | 0.24  |

|              |              |          |       |
|--------------|--------------|----------|-------|
| ILMN_1798454 | MAD2L1BP     | 6.84E-03 | 0.28  |
| ILMN_1655913 | NUCB2        | 6.84E-03 | -0.30 |
| ILMN_2396571 | GPR108       | 6.85E-03 | -0.22 |
| ILMN_1763228 | MEF2D        | 6.87E-03 | -0.44 |
| ILMN_1754051 | RMI1         | 6.88E-03 | 0.25  |
| ILMN_1713603 | PRKCB1       | 6.88E-03 | -0.22 |
| ILMN_2410783 | GAA          | 6.88E-03 | -0.28 |
| ILMN_1762224 | HPS3         | 6.88E-03 | 0.25  |
| ILMN_1702609 | B3GNT5       | 6.88E-03 | 0.19  |
| ILMN_1743396 | ACOX3        | 6.88E-03 | 0.23  |
| ILMN_1758938 | SLC31A2      | 6.89E-03 | -0.33 |
| ILMN_1796734 | SPARC        | 6.90E-03 | -0.35 |
| ILMN_1715401 | MT1G         | 6.93E-03 | -0.31 |
| ILMN_3270853 | LOC100130298 | 6.94E-03 | -0.16 |
| ILMN_1698508 | ST8SIA6      | 6.95E-03 | 0.08  |
| ILMN_2384181 | DHRS9        | 6.97E-03 | -0.29 |
| ILMN_1721621 | NKTR         | 6.99E-03 | -0.25 |
| ILMN_3214052 | LOC644877    | 6.99E-03 | 0.36  |
| ILMN_1684293 | ANP32B       | 7.01E-03 | 0.28  |
| ILMN_2069060 | RBM11        | 7.03E-03 | 0.35  |
| ILMN_1658460 | LOC653884    | 7.04E-03 | 0.31  |
| ILMN_2234412 | TLE3         | 7.04E-03 | -0.19 |
| ILMN_1698019 | LGMN         | 7.06E-03 | -0.35 |
| ILMN_2112580 | FCGR3A       | 7.06E-03 | -0.14 |
| ILMN_1798528 | SULT1A2      | 7.07E-03 | -0.16 |
| ILMN_1657968 | MAP2K2       | 7.08E-03 | -0.24 |
| ILMN_1798543 | STK17B       | 7.09E-03 | 0.28  |
| ILMN_1743662 | KBTBD3       | 7.10E-03 | -0.12 |
| ILMN_1815115 | CYC1         | 7.11E-03 | 0.26  |
| ILMN_2173975 | RTP4         | 7.13E-03 | -0.21 |
| ILMN_3233229 | SNHG7        | 7.16E-03 | -0.18 |
| ILMN_1712914 | SEMA6B       | 7.18E-03 | -0.65 |
| ILMN_1756238 | TMEM217      | 7.19E-03 | 0.19  |
| ILMN_1910908 |              | 7.21E-03 | -0.17 |
| ILMN_1655884 | ATP2A2       | 7.22E-03 | 0.30  |
| ILMN_1670134 | FADS1        | 7.23E-03 | -0.28 |
| ILMN_1708502 | AFF4         | 7.23E-03 | 0.30  |
| ILMN_2373285 | MSR1         | 7.23E-03 | -0.36 |
| ILMN_1718900 | KCTD2        | 7.25E-03 | -0.23 |
| ILMN_1767068 | SMAD6        | 7.25E-03 | 0.31  |
| ILMN_1700762 | PBX4         | 7.26E-03 | 0.11  |
| ILMN_1664912 | IL11RA       | 7.27E-03 | -0.23 |
| ILMN_1788778 | 42258        | 7.30E-03 | 0.35  |
| ILMN_1767422 | POLR1D       | 7.30E-03 | -0.30 |
| ILMN_1681670 | SLC25A4      | 7.30E-03 | 0.20  |
| ILMN_1746917 | LOC729843    | 7.31E-03 | -0.26 |

|              |            |          |       |
|--------------|------------|----------|-------|
| ILMN_1793959 | ADPGK      | 7.32E-03 | 0.36  |
| ILMN_1763364 | WHAMM      | 7.34E-03 | 0.17  |
| ILMN_1720311 | SLC25A46   | 7.35E-03 | 0.25  |
| ILMN_1815261 | PDIA4      | 7.35E-03 | 0.21  |
| ILMN_1761147 | GABPB2     | 7.36E-03 | 0.24  |
| ILMN_1714522 | CLMN       | 7.36E-03 | -0.21 |
| ILMN_1674282 | PPARD      | 7.37E-03 | -0.19 |
| ILMN_3187771 | C14orf167  | 7.39E-03 | -0.25 |
| ILMN_1662747 | EVI2A      | 7.39E-03 | -0.18 |
| ILMN_2329114 | COLQ       | 7.45E-03 | -0.15 |
| ILMN_1686920 | CCDC58     | 7.49E-03 | -0.19 |
| ILMN_1670322 | FCHO2      | 7.49E-03 | -0.31 |
| ILMN_1714253 | AGRP       | 7.52E-03 | -0.16 |
| ILMN_1813746 | CORO2A     | 7.52E-03 | 0.24  |
| ILMN_1715392 | PRPF3      | 7.52E-03 | 0.23  |
| ILMN_1704353 | IGSF3      | 7.53E-03 | 0.26  |
| ILMN_1681203 | TWF1       | 7.55E-03 | 0.22  |
| ILMN_1731224 | PARP9      | 7.56E-03 | -0.28 |
| ILMN_2316278 | MAGED4B    | 7.56E-03 | -0.25 |
| ILMN_2328433 | NOP2       | 7.57E-03 | 0.16  |
| ILMN_1765446 | EMP3       | 7.57E-03 | -0.36 |
| ILMN_3196019 | FAM60A     | 7.57E-03 | 0.17  |
| ILMN_1668378 | SFT2D2     | 7.58E-03 | 0.17  |
| ILMN_1715991 | SDPR       | 7.59E-03 | 0.23  |
| ILMN_2359345 | NET1       | 7.61E-03 | 0.15  |
| ILMN_1730917 | KMO        | 7.66E-03 | 0.28  |
| ILMN_1846922 |            | 7.67E-03 | -0.22 |
| ILMN_2152402 | BAT5       | 7.68E-03 | 0.38  |
| ILMN_2184966 | ZHX2       | 7.68E-03 | -0.26 |
| ILMN_3272603 | FAM60A     | 7.69E-03 | 0.29  |
| ILMN_1726545 | LILRA5     | 7.71E-03 | -0.19 |
| ILMN_2144426 | HIST2H2AA3 | 7.71E-03 | -0.63 |
| ILMN_1691616 | LOC727935  | 7.74E-03 | -0.29 |
| ILMN_2328280 | ACTL6A     | 7.75E-03 | 0.25  |
| ILMN_1764175 | GPD1       | 7.77E-03 | 0.11  |
| ILMN_2059505 | ARPP19     | 7.81E-03 | -0.33 |
| ILMN_1736995 | C12orf66   | 7.82E-03 | 0.16  |
| ILMN_2086470 | PDGFRA     | 7.82E-03 | -0.11 |
| ILMN_2192316 | TOP1       | 7.84E-03 | 0.21  |
| ILMN_1747622 | CD33       | 7.85E-03 | -0.30 |
| ILMN_2183216 | TTRAP      | 7.85E-03 | -0.32 |
| ILMN_1714384 | PCCA       | 7.86E-03 | -0.23 |
| ILMN_1778347 | NUDT2      | 7.86E-03 | -0.25 |
| ILMN_2109156 | RANBP1     | 7.87E-03 | 0.31  |
| ILMN_1664330 | CEACAM1    | 7.89E-03 | -0.12 |
| ILMN_2164081 | KLHL12     | 7.89E-03 | -0.27 |



|              |           |          |       |
|--------------|-----------|----------|-------|
| ILMN_3226392 | LOC729608 | 7.94E-03 | 0.35  |
| ILMN_1793934 | PISD      | 7.96E-03 | -0.31 |
| ILMN_1697409 | TNFRSF14  | 7.98E-03 | 0.33  |
| ILMN_1704376 | GLDN      | 7.99E-03 | 0.26  |
| ILMN_1813938 | CHCHD4    | 7.99E-03 | 0.31  |
| ILMN_1778974 | LILRB4    | 7.99E-03 | -0.17 |
| ILMN_1714000 | NXPH3     | 7.99E-03 | 0.10  |
| ILMN_1812226 | ICAM1     | 8.01E-03 | 0.34  |
| ILMN_2169261 | TNNI2     | 8.01E-03 | -0.27 |
| ILMN_1782618 | C9orf16   | 8.06E-03 | 0.17  |
| ILMN_1692731 | TTYH3     | 8.06E-03 | -0.31 |
| ILMN_1670875 | PPM1D     | 8.07E-03 | -0.24 |
| ILMN_1769633 | CTSO      | 8.08E-03 | -0.26 |
| ILMN_1767541 | ARAP2     | 8.09E-03 | 0.12  |
| ILMN_1666078 | HLA-H     | 8.09E-03 | -0.31 |
| ILMN_1794968 | LRRRC28   | 8.11E-03 | -0.19 |
| ILMN_1772459 | RPS23     | 8.11E-03 | 0.24  |
| ILMN_1722662 | RAD23B    | 8.13E-03 | 0.25  |
| ILMN_2083333 | PMS2L5    | 8.15E-03 | -0.19 |
| ILMN_2330966 | PTK2B     | 8.16E-03 | -0.23 |
| ILMN_2230016 | HIGD1A    | 8.16E-03 | 0.34  |
| ILMN_1741632 | RAB3IL1   | 8.16E-03 | -0.47 |
| ILMN_2409290 | CCPG1     | 8.17E-03 | -0.23 |
| ILMN_1777066 | NIF3L1    | 8.18E-03 | -0.28 |
| ILMN_1700923 | ATG4C     | 8.19E-03 | -0.34 |
| ILMN_1692121 | USO1      | 8.21E-03 | 0.27  |
| ILMN_2393046 | NHLRC3    | 8.23E-03 | -0.29 |
| ILMN_2090351 | OR7E156P  | 8.27E-03 | -0.12 |
| ILMN_1673119 | AFF1      | 8.28E-03 | 0.10  |
| ILMN_1766425 | REPS2     | 8.31E-03 | -0.18 |
| ILMN_1728984 | PA2G4     | 8.36E-03 | 0.26  |
| ILMN_1779832 | LOC400214 | 8.38E-03 | 0.10  |
| ILMN_1698213 | RBM3      | 8.40E-03 | 0.32  |
| ILMN_1849013 |           | 8.42E-03 | 0.36  |
| ILMN_1907042 |           | 8.42E-03 | -0.26 |
| ILMN_1690802 | TRMT112   | 8.46E-03 | -0.34 |
| ILMN_1651343 | ITGA11    | 8.48E-03 | 0.24  |
| ILMN_1911503 |           | 8.49E-03 | -0.16 |
| ILMN_1774447 | AMPD3     | 8.53E-03 | -0.21 |
| ILMN_1706511 | TEF       | 8.55E-03 | -0.17 |
| ILMN_2129015 | AFF1      | 8.55E-03 | 0.23  |
| ILMN_1701604 | TBC1D8B   | 8.56E-03 | -0.10 |
| ILMN_1736577 | ZNF688    | 8.56E-03 | -0.18 |
| ILMN_2067269 | RECK      | 8.56E-03 | -0.18 |
| ILMN_2232520 | ANKRD28   | 8.56E-03 | -0.17 |
| ILMN_2075847 | ZC3H10    | 8.58E-03 | -0.21 |

|              |              |          |       |
|--------------|--------------|----------|-------|
| ILMN_2090782 | GCSH         | 8.58E-03 | 0.20  |
| ILMN_1801845 | DNAL4        | 8.58E-03 | -0.27 |
| ILMN_2173291 | CYP4B1       | 8.61E-03 | -0.21 |
| ILMN_1737394 | LMNA         | 8.61E-03 | 0.33  |
| ILMN_1755589 | DIP2B        | 8.63E-03 | 0.26  |
| ILMN_1711414 | MRPS27       | 8.64E-03 | 0.26  |
| ILMN_1770505 | BIK          | 8.65E-03 | 0.10  |
| ILMN_1761247 | PIR          | 8.65E-03 | -0.35 |
| ILMN_1729234 | TPP1         | 8.65E-03 | -0.30 |
| ILMN_1686862 | HLX          | 8.65E-03 | 0.27  |
| ILMN_1672503 | DPYSL2       | 8.66E-03 | 0.40  |
| ILMN_2339294 | LILRB5       | 8.69E-03 | -0.37 |
| ILMN_3178302 | FNDC3B       | 8.74E-03 | 0.30  |
| ILMN_2382505 | SLC22A18     | 8.76E-03 | -0.27 |
| ILMN_1773395 | RDH5         | 8.78E-03 | -0.16 |
| ILMN_1783684 | LOC648695    | 8.79E-03 | 0.33  |
| ILMN_3200140 | LOC645638    | 8.82E-03 | 0.54  |
| ILMN_1801020 | ADK          | 8.82E-03 | 0.21  |
| ILMN_1785405 | SLC17A9      | 8.83E-03 | 0.16  |
| ILMN_1703650 | TNIP1        | 8.84E-03 | 0.32  |
| ILMN_1811238 | ALPK2        | 8.84E-03 | 0.14  |
| ILMN_2369286 | NME7         | 8.85E-03 | -0.20 |
| ILMN_3293685 | LOC286444    | 8.86E-03 | 0.38  |
| ILMN_3303612 | PABPC1L      | 8.86E-03 | 0.36  |
| ILMN_1663416 | LOC642250    | 8.86E-03 | -0.26 |
| ILMN_3252446 | LOC100129543 | 8.86E-03 | -0.78 |
| ILMN_2098418 | LOC652968    | 8.86E-03 | -0.16 |
| ILMN_2246661 | FAHD1        | 8.91E-03 | 0.25  |
| ILMN_1678212 | TMCC1        | 8.91E-03 | -0.09 |
| ILMN_1660629 | NBEAL2       | 8.91E-03 | -0.28 |
| ILMN_2067708 | TFB2M        | 8.94E-03 | 0.29  |
| ILMN_1761464 | CD74         | 8.94E-03 | 0.34  |
| ILMN_1723398 | CSNK1G1      | 8.94E-03 | 0.12  |
| ILMN_1718853 | UQCRC2       | 8.94E-03 | 0.32  |
| ILMN_1904980 |              | 8.94E-03 | 0.22  |
| ILMN_2366634 | PKM2         | 8.94E-03 | -0.31 |
| ILMN_1781626 | C1S          | 8.96E-03 | -0.38 |
| ILMN_2186806 | HLA-F        | 8.96E-03 | -0.27 |
| ILMN_3211079 | LOC148430    | 8.97E-03 | 0.30  |
| ILMN_1757914 | C19orf56     | 8.97E-03 | -0.29 |
| ILMN_2374159 | HERPUD1      | 9.00E-03 | -0.35 |
| ILMN_2366703 | SGK3         | 9.01E-03 | -0.29 |
| ILMN_1763793 | PPM1L        | 9.03E-03 | 0.10  |
| ILMN_1702487 | SGK          | 9.03E-03 | -0.38 |
| ILMN_1751868 | TCTEX1D1     | 9.03E-03 | -0.24 |
| ILMN_1730568 | ZDHHC7       | 9.03E-03 | -0.34 |

|              |           |          |       |
|--------------|-----------|----------|-------|
| ILMN_2162799 | AHR       | 9.06E-03 | 0.22  |
| ILMN_1775761 | TSR1      | 9.06E-03 | 0.21  |
| ILMN_1700955 | TCTEX1D2  | 9.07E-03 | 0.34  |
| ILMN_2307032 | OSBPL5    | 9.09E-03 | -0.21 |
| ILMN_1663195 | MCM7      | 9.15E-03 | -0.24 |
| ILMN_1811470 | PLEK2     | 9.15E-03 | -0.23 |
| ILMN_1739942 | FAM117B   | 9.17E-03 | -0.26 |
| ILMN_1849134 |           | 9.20E-03 | 0.09  |
| ILMN_2340935 | WBP5      | 9.21E-03 | -0.37 |
| ILMN_1776105 | PSPH      | 9.21E-03 | 0.32  |
| ILMN_1720484 | CRTAP     | 9.22E-03 | -0.14 |
| ILMN_1765204 | ST13      | 9.26E-03 | 0.35  |
| ILMN_1658121 | CFP       | 9.26E-03 | 0.18  |
| ILMN_1788347 | KIAA1737  | 9.26E-03 | 0.26  |
| ILMN_1695311 | HLA-DMA   | 9.27E-03 | 0.32  |
| ILMN_1681467 | RAB11FIP4 | 9.32E-03 | 0.13  |
| ILMN_1692160 | C6orf114  | 9.32E-03 | 0.22  |
| ILMN_1672135 | ZNF615    | 9.32E-03 | -0.22 |
| ILMN_1808979 | CLEC4D    | 9.33E-03 | -0.22 |
| ILMN_1705769 | IL7       | 9.34E-03 | -0.14 |
| ILMN_1670377 | ZNF20     | 9.36E-03 | -0.20 |
| ILMN_1763828 | MTF1      | 9.44E-03 | -0.23 |
| ILMN_2373728 | ASB9      | 9.45E-03 | -0.10 |
| ILMN_1664118 | LOC643665 | 9.48E-03 | 0.10  |
| ILMN_1660341 | LRPAP1    | 9.49E-03 | -0.35 |
| ILMN_2337928 | CXCR5     | 9.49E-03 | -0.25 |
| ILMN_1775257 | PROK2     | 9.55E-03 | -0.11 |
| ILMN_1677098 | YPEL2     | 9.55E-03 | 0.26  |
| ILMN_1794213 | ABHD14A   | 9.55E-03 | -0.22 |
| ILMN_1854384 |           | 9.55E-03 | 0.15  |
| ILMN_1749907 | LOC441241 | 9.56E-03 | 0.18  |
| ILMN_2145518 | TMEM126B  | 9.56E-03 | -0.28 |
| ILMN_2151488 | RMI1      | 9.56E-03 | 0.23  |
| ILMN_3308961 | MIR1974   | 9.60E-03 | -0.40 |
| ILMN_1722742 | SCLY      | 9.64E-03 | 0.15  |
| ILMN_1718946 | ADAM10    | 9.66E-03 | -0.29 |
| ILMN_1771599 | PLOD2     | 9.66E-03 | -0.21 |
| ILMN_1757317 | LARS      | 9.68E-03 | 0.28  |
| ILMN_1793643 | MRM1      | 9.68E-03 | 0.10  |
| ILMN_1696933 | NLRP3     | 9.70E-03 | -0.14 |
| ILMN_2358626 | ADK       | 9.70E-03 | 0.36  |
| ILMN_1787410 | EIF6      | 9.72E-03 | 0.32  |
| ILMN_1696127 | KIAA0240  | 9.73E-03 | -0.25 |
| ILMN_1680738 | C5orf13   | 9.74E-03 | -0.27 |
| ILMN_1703180 | ETV3      | 9.75E-03 | 0.40  |
| ILMN_2363426 | MAX       | 9.76E-03 | -0.36 |

|              |           |          |       |
|--------------|-----------|----------|-------|
| ILMN_1778523 | KLF9      | 9.76E-03 | 0.38  |
| ILMN_1812091 | FAM20A    | 9.77E-03 | 0.24  |
| ILMN_3239629 | LOC729679 | 9.79E-03 | 0.33  |
| ILMN_3244963 | WDR42A    | 9.79E-03 | -0.26 |
| ILMN_2144573 | CTBS      | 9.79E-03 | -0.34 |
| ILMN_1685052 | DNAH1     | 9.81E-03 | -0.16 |
| ILMN_1726308 | FAM10A4   | 9.82E-03 | 0.29  |
| ILMN_3216125 | LOC728126 | 9.82E-03 | 0.28  |
| ILMN_3242016 | POTEE     | 9.82E-03 | 0.18  |
| ILMN_1811579 | HOMER3    | 9.85E-03 | -0.28 |
| ILMN_1736982 | PHACTR1   | 9.87E-03 | -0.17 |
| ILMN_1713301 | DGCR2     | 9.87E-03 | -0.21 |
| ILMN_1802894 | VKORC1L1  | 9.88E-03 | 0.30  |
| ILMN_1699226 | UBR4      | 9.89E-03 | 0.30  |
| ILMN_1808860 | STX5      | 9.89E-03 | -0.19 |
| ILMN_1700633 | ABHD4     | 9.89E-03 | 0.20  |
| ILMN_1773964 | H1FX      | 9.90E-03 | -0.20 |
| ILMN_1663646 | DMXL1     | 9.91E-03 | -0.22 |
| ILMN_1811909 | LOC402221 | 9.91E-03 | 0.40  |
| ILMN_1763129 | DCTPP1    | 9.91E-03 | 0.30  |
| ILMN_1732176 | AGPAT2    | 9.92E-03 | -0.22 |
| ILMN_1812967 | CNPY3     | 9.92E-03 | -0.24 |
| ILMN_1742577 | GTPBP4    | 9.92E-03 | 0.30  |
| ILMN_2186877 | FLJ10213  | 9.94E-03 | -0.14 |
| ILMN_2212780 | GGTA1     | 9.94E-03 | 0.11  |
| ILMN_1708348 | ADAM8     | 9.94E-03 | -0.29 |
| ILMN_2146766 | FABP5     | 9.98E-03 | 0.15  |
| ILMN_1667994 | AMD1      | 9.98E-03 | 0.30  |

#### Azithromycin (AZM)

| ProbeID      | Gene Symbol | FDR      | Log <sub>2</sub> [AZM/NoTx] |
|--------------|-------------|----------|-----------------------------|
| ILMN_1801443 | TSKU        | 1.90E-07 | 1.33                        |
| ILMN_1711888 | COBL        | 1.90E-07 | 1.12                        |
| ILMN_1712475 | HS3ST2      | 1.90E-07 | 2.05                        |
| ILMN_2408683 | PPAP2B      | 1.90E-07 | 1.46                        |
| ILMN_1795342 | MLPH        | 1.90E-07 | 1.63                        |
| ILMN_1693009 | FGL2        | 1.90E-07 | -1.81                       |
| ILMN_2205963 | C10orf54    | 2.84E-07 | -1.42                       |
| ILMN_3243682 | C1orf93     | 2.84E-07 | 1.40                        |
| ILMN_1729801 | S100A8      | 3.46E-07 | -2.15                       |
| ILMN_1655549 | SIGLEC10    | 4.03E-07 | -1.38                       |
| ILMN_1750974 | S100A9      | 4.03E-07 | -1.30                       |
| ILMN_2099277 | HTRA4       | 4.03E-07 | 1.81                        |
| ILMN_1689001 | CDK4        | 4.03E-07 | 1.17                        |

|              |           |          |       |
|--------------|-----------|----------|-------|
| ILMN_2235851 | LINCR     | 4.03E-07 | 1.19  |
| ILMN_1747347 | C17orf60  | 4.03E-07 | -1.26 |
| ILMN_1713749 | CORO1A    | 4.03E-07 | -1.09 |
| ILMN_1734740 | GPR65     | 4.71E-07 | -1.14 |
| ILMN_2404688 | NUPR1     | 4.71E-07 | 1.48  |
| ILMN_2092118 | FPR1      | 8.19E-07 | -1.33 |
| ILMN_1780465 | CLEC5A    | 1.05E-06 | -1.38 |
| ILMN_1721035 | MS4A6A    | 1.05E-06 | -1.65 |
| ILMN_2125747 | LOC606724 | 1.05E-06 | -1.01 |
| ILMN_1703538 | AIF1      | 1.09E-06 | -1.04 |
| ILMN_2388800 | PPAP2B    | 1.14E-06 | 1.56  |
| ILMN_1729188 | HAMP      | 1.19E-06 | 2.07  |
| ILMN_1730628 | RNASE2    | 1.19E-06 | -0.72 |
| ILMN_1785902 | C1QC      | 1.19E-06 | -1.07 |
| ILMN_2070375 | GPR82     | 1.23E-06 | -1.10 |
| ILMN_1739751 | SLC26A11  | 1.23E-06 | 1.50  |
| ILMN_1803560 | LAT2      | 1.23E-06 | -0.88 |
| ILMN_2232121 | GPR65     | 1.44E-06 | -1.09 |
| ILMN_3193306 | C14orf109 | 1.52E-06 | 0.94  |
| ILMN_1810628 | KIAA0367  | 1.52E-06 | -0.91 |
| ILMN_1726666 | GPX3      | 1.61E-06 | -1.20 |
| ILMN_1691410 | BAMBI     | 1.61E-06 | 1.04  |
| ILMN_1791211 | DOK2      | 1.61E-06 | -0.86 |
| ILMN_1797731 | MS4A6A    | 1.61E-06 | -1.57 |
| ILMN_1758895 | CTSK      | 1.62E-06 | 0.96  |
| ILMN_1769876 | TBC1D2    | 1.62E-06 | 1.18  |
| ILMN_1719433 | CD1D      | 1.67E-06 | -0.90 |
| ILMN_1810560 | P8        | 1.72E-06 | 1.37  |
| ILMN_1740015 | CD14      | 1.73E-06 | -1.44 |
| ILMN_2359800 | MS4A6A    | 1.73E-06 | -1.51 |
| ILMN_1669523 | FOS       | 1.85E-06 | -1.05 |
| ILMN_1752899 | BCL11A    | 1.85E-06 | 1.19  |
| ILMN_2137536 | ZZZ3      | 1.93E-06 | 1.10  |
| ILMN_1703946 | ADORA2B   | 2.07E-06 | 0.97  |
| ILMN_1713505 | NPC1      | 2.07E-06 | 0.91  |
| ILMN_1713829 | PTGES     | 2.13E-06 | 1.13  |
| ILMN_1702231 | C1orf54   | 2.44E-06 | -0.94 |
| ILMN_1736982 | PHACTR1   | 2.44E-06 | 0.74  |
| ILMN_1900661 |           | 2.47E-06 | 0.98  |
| ILMN_1676893 | ADCY3     | 2.47E-06 | 1.08  |
| ILMN_2289849 | FCGR2A    | 2.55E-06 | -0.85 |
| ILMN_1712026 | NLRP3     | 2.62E-06 | -0.93 |
| ILMN_1773006 | FABP4     | 2.70E-06 | -0.85 |
| ILMN_1712082 | GCNT3     | 2.74E-06 | 0.59  |
| ILMN_1784207 | C1orf128  | 2.81E-06 | 0.95  |
| ILMN_1746888 | PCOLCE2   | 3.00E-06 | -0.68 |

|              |           |          |       |
|--------------|-----------|----------|-------|
| ILMN_1736939 | UGCG      | 3.00E-06 | 0.90  |
| ILMN_1655244 | LOC642755 | 3.02E-06 | 1.11  |
| ILMN_1804277 | SPRED1    | 3.02E-06 | -0.99 |
| ILMN_1790689 | CRISPLD2  | 3.05E-06 | -1.19 |
| ILMN_2233539 | SLC39A8   | 3.13E-06 | -1.21 |
| ILMN_1695316 | SLC39A8   | 3.32E-06 | -1.44 |
| ILMN_1697409 | TNFRSF14  | 3.38E-06 | 0.85  |
| ILMN_1814998 | FKSG30    | 3.47E-06 | -0.99 |
| ILMN_1787186 | NOV       | 3.55E-06 | 0.85  |
| ILMN_1804938 | GPR175    | 3.70E-06 | 0.79  |
| ILMN_3269775 | C14orf109 | 3.70E-06 | 1.21  |
| ILMN_1710962 | TMEM97    | 3.82E-06 | 0.92  |
| ILMN_1669940 | TMEM38B   | 3.83E-06 | 0.97  |
| ILMN_2396020 | DUSP6     | 3.83E-06 | -1.38 |
| ILMN_1739222 | ETV5      | 3.93E-06 | -1.31 |
| ILMN_2407389 | GPNMB     | 4.31E-06 | 0.96  |
| ILMN_1717056 | TXNRD1    | 4.31E-06 | 1.00  |
| ILMN_1782050 | CEBPD     | 4.52E-06 | -1.05 |
| ILMN_1693452 | GAL3ST4   | 4.57E-06 | -1.39 |
| ILMN_1800078 | LMO2      | 4.83E-06 | -1.07 |
| ILMN_2399300 | NAV2      | 4.86E-06 | 0.68  |
| ILMN_2145280 | DEF6      | 4.97E-06 | -0.91 |
| ILMN_1691341 | IL7R      | 4.97E-06 | -0.96 |
| ILMN_1756928 | RTN1      | 4.97E-06 | -1.06 |
| ILMN_2326953 | LAT2      | 4.97E-06 | -0.87 |
| ILMN_1790973 | CDS2      | 4.97E-06 | 0.81  |
| ILMN_1754894 | C1orf162  | 5.04E-06 | -0.84 |
| ILMN_1714170 | SPSB1     | 5.23E-06 | 0.83  |
| ILMN_1738992 | MNDA      | 5.48E-06 | -0.80 |
| ILMN_1701933 | SNCA      | 5.56E-06 | 1.01  |
| ILMN_1714433 | MARCKSL1  | 5.69E-06 | -1.00 |
| ILMN_3241758 | POTEF     | 5.77E-06 | -0.80 |
| ILMN_1703955 | FBXO32    | 5.79E-06 | 0.73  |
| ILMN_1731644 | SETDB2    | 5.87E-06 | 1.14  |
| ILMN_1701947 | GPR34     | 6.01E-06 | -1.25 |
| ILMN_1659352 | KCNK13    | 6.11E-06 | -0.91 |
| ILMN_1731928 | LY9       | 6.30E-06 | 0.52  |
| ILMN_2083469 | IRS2      | 6.56E-06 | 0.86  |
| ILMN_1769388 | GJB2      | 6.98E-06 | 0.95  |
| ILMN_1730710 | ADORA3    | 6.98E-06 | -1.07 |
| ILMN_1797875 | ALOX5AP   | 6.98E-06 | -1.33 |
| ILMN_2183409 | SCARB1    | 6.98E-06 | 0.82  |
| ILMN_1792473 | AIF1      | 6.98E-06 | -1.03 |
| ILMN_1686623 | CSF1R     | 7.11E-06 | -1.26 |
| ILMN_2329429 | GIMAP6    | 7.21E-06 | -0.85 |
| ILMN_1688373 | LST1      | 7.21E-06 | -0.77 |

|              |           |          |       |
|--------------|-----------|----------|-------|
| ILMN_2382657 | ARHGAP9   | 7.58E-06 | -0.68 |
| ILMN_1802557 | HEBP1     | 7.58E-06 | 0.87  |
| ILMN_1785345 | GPR84     | 7.58E-06 | -0.73 |
| ILMN_1791569 | PLXNA1    | 7.66E-06 | 0.57  |
| ILMN_2212763 | ICAM3     | 7.66E-06 | -0.76 |
| ILMN_1740875 | FPR2      | 7.66E-06 | -0.97 |
| ILMN_1811909 | LOC402221 | 7.67E-06 | -0.80 |
| ILMN_2312340 | LILRB2    | 8.10E-06 | -0.93 |
| ILMN_1815023 | PIM1      | 8.12E-06 | 1.50  |
| ILMN_2400322 | DYRK3     | 8.12E-06 | 0.49  |
| ILMN_1738558 | RGS20     | 8.12E-06 | 0.97  |
| ILMN_1752947 | C17orf79  | 8.12E-06 | 0.82  |
| ILMN_2046611 | MCOLN3    | 8.56E-06 | 0.73  |
| ILMN_2316386 | GPBAR1    | 9.04E-06 | -1.12 |
| ILMN_1698209 | AGPS      | 9.34E-06 | 1.03  |
| ILMN_2387952 | FAM134B   | 9.34E-06 | 1.52  |
| ILMN_1702301 | DOCK10    | 9.36E-06 | -0.88 |
| ILMN_2391051 | FCGR1B    | 9.81E-06 | -0.68 |
| ILMN_1812278 | LY9       | 9.86E-06 | 1.01  |
| ILMN_2050911 | SLC22A4   | 9.86E-06 | -0.51 |
| ILMN_1653618 | ZZZ3      | 9.95E-06 | 1.07  |
| ILMN_2200917 | SLC4A7    | 9.95E-06 | -0.94 |
| ILMN_1765796 | ENO2      | 9.95E-06 | 0.39  |
| ILMN_1694268 | HES6      | 9.95E-06 | 0.91  |
| ILMN_1800739 | SPINT2    | 9.95E-06 | -0.76 |
| ILMN_1742332 | KCTD12    | 9.95E-06 | -0.96 |
| ILMN_2138589 | MERTK     | 9.95E-06 | -0.98 |
| ILMN_1689329 | SCD       | 9.95E-06 | 1.08  |
| ILMN_1768181 | TOR3A     | 9.97E-06 | 0.95  |
| ILMN_1717326 | SLC29A3   | 1.03E-05 | 0.96  |
| ILMN_1684045 | CDCA4     | 1.07E-05 | 0.52  |
| ILMN_1738866 | DEXI      | 1.07E-05 | 0.79  |
| ILMN_1801616 | EMP1      | 1.10E-05 | 0.81  |
| ILMN_1735827 | NISCH     | 1.10E-05 | -0.83 |
| ILMN_1799889 | ATP6V0D2  | 1.14E-05 | 1.08  |
| ILMN_1776678 | GIMAP7    | 1.14E-05 | -0.99 |
| ILMN_1700690 | VAT1      | 1.14E-05 | 1.02  |
| ILMN_1756784 | FREQ      | 1.14E-05 | 0.75  |
| ILMN_1793287 | LOC642755 | 1.19E-05 | 0.80  |
| ILMN_1806165 | HSPA6     | 1.20E-05 | -0.96 |
| ILMN_3243705 | PDXDC1    | 1.20E-05 | 0.84  |
| ILMN_2351548 | FAIM      | 1.21E-05 | 0.75  |
| ILMN_1727709 | GPBAR1    | 1.24E-05 | -0.79 |
| ILMN_1772218 | HLA-DPA1  | 1.25E-05 | -0.73 |
| ILMN_1782729 | CLECL1    | 1.25E-05 | -0.78 |
| ILMN_2297710 | PLEKHB2   | 1.30E-05 | 0.67  |

|              |          |          |       |
|--------------|----------|----------|-------|
| ILMN_1798061 | ZFYVE26  | 1.30E-05 | 0.76  |
| ILMN_1723035 | OLR1     | 1.30E-05 | -1.14 |
| ILMN_2067656 | CCND2    | 1.31E-05 | -0.75 |
| ILMN_1792455 | TMEM158  | 1.32E-05 | 0.87  |
| ILMN_1735910 | VMO1     | 1.32E-05 | -0.78 |
| ILMN_2255133 | BCL11A   | 1.32E-05 | 1.19  |
| ILMN_1804735 | CBS      | 1.33E-05 | 0.79  |
| ILMN_2261600 | FCGR1B   | 1.35E-05 | -0.67 |
| ILMN_1682459 | TUBB4    | 1.35E-05 | 0.82  |
| ILMN_1690101 | FAIM     | 1.35E-05 | 1.02  |
| ILMN_1685824 | B4GALT5  | 1.35E-05 | 0.95  |
| ILMN_1801307 | TNFSF10  | 1.35E-05 | -0.65 |
| ILMN_2333670 | RNASE1   | 1.35E-05 | -1.03 |
| ILMN_2399363 | CLEC4A   | 1.36E-05 | -0.87 |
| ILMN_2345353 | LST1     | 1.36E-05 | -0.77 |
| ILMN_1661622 | TBC1D7   | 1.36E-05 | 0.75  |
| ILMN_2324421 | TXNRD1   | 1.36E-05 | 1.02  |
| ILMN_1813561 | SCIN     | 1.41E-05 | 0.75  |
| ILMN_2291954 | SLA      | 1.42E-05 | -0.65 |
| ILMN_1737484 | RTN4R    | 1.43E-05 | 1.36  |
| ILMN_3235477 | RRP1     | 1.43E-05 | 0.48  |
| ILMN_1723260 | ETV5     | 1.49E-05 | -0.51 |
| ILMN_1664828 | APOBEC3H | 1.49E-05 | -0.58 |
| ILMN_1795963 | OKL38    | 1.55E-05 | 0.93  |
| ILMN_1685703 | ACOX2    | 1.64E-05 | -0.89 |
| ILMN_1812618 | ARAP3    | 1.64E-05 | -0.64 |
| ILMN_1718936 | LST1     | 1.64E-05 | -0.80 |
| ILMN_1655987 | STAB1    | 1.64E-05 | -0.81 |
| ILMN_1751901 | TMEM163  | 1.90E-05 | 1.22  |
| ILMN_1727532 | OLFML3   | 1.92E-05 | -0.88 |
| ILMN_1779015 | ZNF467   | 1.92E-05 | -1.13 |
| ILMN_2176063 | FCGR1A   | 1.92E-05 | -0.63 |
| ILMN_2101278 | RGS18    | 1.96E-05 | -0.91 |
| ILMN_2338038 | AK3L1    | 2.00E-05 | 0.75  |
| ILMN_1712532 | CARD9    | 2.11E-05 | -0.73 |
| ILMN_1807919 | TNS1     | 2.21E-05 | 0.56  |
| ILMN_1684887 | SAMSN1   | 2.23E-05 | -0.86 |
| ILMN_1731412 | UBTD2    | 2.24E-05 | 0.64  |
| ILMN_1791647 | ASIP     | 2.30E-05 | 0.43  |
| ILMN_1698732 | PALLD    | 2.36E-05 | 0.68  |
| ILMN_1651769 | ZFYVE16  | 2.42E-05 | 0.77  |
| ILMN_1819783 |          | 2.46E-05 | 0.99  |
| ILMN_1768534 | BHLHB2   | 2.46E-05 | 0.99  |
| ILMN_1671442 | WDR43    | 2.46E-05 | 0.62  |
| ILMN_1718769 | ITSN1    | 2.46E-05 | -0.72 |
| ILMN_1671478 | CKB      | 2.52E-05 | 0.63  |



|              |          |          |       |
|--------------|----------|----------|-------|
| ILMN_1808783 | STRBP    | 2.54E-05 | 0.49  |
| ILMN_1660031 | P2RY6    | 2.58E-05 | -0.72 |
| ILMN_2384241 | TGFBR2   | 2.58E-05 | -0.78 |
| ILMN_1803811 | TRIB1    | 2.58E-05 | -0.73 |
| ILMN_1785161 | CHCHD6   | 2.61E-05 | 0.79  |
| ILMN_2169490 | TDRD9    | 2.66E-05 | 0.51  |
| ILMN_1747305 | GIMAP8   | 2.68E-05 | -0.83 |
| ILMN_2294762 | AMY1A    | 2.68E-05 | -0.77 |
| ILMN_2134974 | RAB38    | 2.68E-05 | 0.89  |
| ILMN_1783956 | ATP8B4   | 2.69E-05 | -1.02 |
| ILMN_2414027 | CKLF     | 2.71E-05 | -0.64 |
| ILMN_3239965 | IDO1     | 2.71E-05 | -0.73 |
| ILMN_1762529 | SLC12A8  | 2.71E-05 | 0.69  |
| ILMN_1759326 | P2RX7    | 2.71E-05 | 0.78  |
| ILMN_1695590 | ADRB2    | 2.80E-05 | -0.74 |
| ILMN_1764321 | ACOT4    | 2.85E-05 | 0.72  |
| ILMN_1872457 |          | 2.93E-05 | 0.54  |
| ILMN_1808919 | HPS4     | 2.93E-05 | 0.85  |
| ILMN_1656057 | PLAU     | 2.93E-05 | 0.87  |
| ILMN_1657871 | RSAD2    | 2.96E-05 | 1.35  |
| ILMN_1788251 | SNN      | 2.98E-05 | 0.56  |
| ILMN_1680996 | ALOX5    | 3.01E-05 | -0.94 |
| ILMN_1792363 | KLK4     | 3.05E-05 | 0.77  |
| ILMN_1787815 | TRIB3    | 3.05E-05 | 1.00  |
| ILMN_1677466 | DUSP6    | 3.05E-05 | -0.56 |
| ILMN_1652825 | IL10RA   | 3.09E-05 | -0.73 |
| ILMN_2197365 | RGS2     | 3.09E-05 | -1.00 |
| ILMN_1715024 | LSS      | 3.10E-05 | 0.82  |
| ILMN_2383163 | DEPDC7   | 3.10E-05 | -0.24 |
| ILMN_1757845 | SPIRE1   | 3.10E-05 | 0.73  |
| ILMN_1770610 | MERTK    | 3.16E-05 | -0.82 |
| ILMN_1738552 | SLC1A3   | 3.16E-05 | 0.76  |
| ILMN_1675584 | HTRA4    | 3.16E-05 | 0.49  |
| ILMN_1666932 | FCGR2A   | 3.17E-05 | -0.83 |
| ILMN_1750429 | MKNK1    | 3.17E-05 | -0.70 |
| ILMN_1741171 | TM2D2    | 3.18E-05 | -0.60 |
| ILMN_2152828 | KIF16B   | 3.30E-05 | 0.59  |
| ILMN_2152131 | ACTB     | 3.31E-05 | -0.59 |
| ILMN_1711838 | SLC25A24 | 3.37E-05 | 0.62  |
| ILMN_1680344 | MYOM1    | 3.37E-05 | -0.34 |
| ILMN_2171289 | SAMSN1   | 3.40E-05 | -0.81 |
| ILMN_1795183 | RNASE1   | 3.42E-05 | -0.76 |
| ILMN_1807972 | MICAL1   | 3.44E-05 | 0.63  |
| ILMN_2292123 | COL4A3BP | 3.45E-05 | 0.42  |
| ILMN_2313782 | ATG4A    | 3.45E-05 | 1.02  |
| ILMN_1769013 | ASGR1    | 3.48E-05 | -1.02 |

|              |           |          |       |
|--------------|-----------|----------|-------|
| ILMN_1702501 | RPS6KA2   | 3.48E-05 | 0.74  |
| ILMN_1816603 |           | 3.48E-05 | -0.43 |
| ILMN_1785202 | STAT4     | 3.50E-05 | -0.68 |
| ILMN_1759792 | CLIP4     | 3.50E-05 | 0.86  |
| ILMN_1727194 | CALU      | 3.53E-05 | 0.66  |
| ILMN_1743933 | TSHZ3     | 3.53E-05 | -0.46 |
| ILMN_1758128 | CYGB      | 3.54E-05 | 0.61  |
| ILMN_1768814 | KLHL6     | 3.58E-05 | 0.89  |
| ILMN_1777519 | ITGB7     | 3.58E-05 | -0.75 |
| ILMN_1713679 | MREG      | 3.62E-05 | 0.88  |
| ILMN_1789338 | SORBS3    | 3.66E-05 | 0.53  |
| ILMN_1758623 | HIST1H2BD | 3.66E-05 | -0.66 |
| ILMN_1705403 | CYP2S1    | 3.70E-05 | -0.62 |
| ILMN_1766165 | SNCA      | 3.70E-05 | 0.81  |
| ILMN_2112988 | NCF1C     | 3.75E-05 | -0.57 |
| ILMN_1704985 | CYP27A1   | 3.78E-05 | 0.85  |
| ILMN_1669409 | VSIG4     | 3.80E-05 | -0.84 |
| ILMN_1777296 | ACTB      | 3.87E-05 | -0.93 |
| ILMN_1672589 | SEMA4B    | 3.89E-05 | -0.49 |
| ILMN_1801205 | GPNMB     | 3.89E-05 | 0.70  |
| ILMN_1687824 | SEPHS2    | 4.09E-05 | 0.88  |
| ILMN_1692466 | LOC728637 | 4.18E-05 | -0.51 |
| ILMN_1739032 | TMEM70    | 4.18E-05 | 0.42  |
| ILMN_3307158 | ATG4A     | 4.29E-05 | 1.07  |
| ILMN_2087656 | SLCO2B1   | 4.29E-05 | -0.82 |
| ILMN_1781691 | TRAK2     | 4.29E-05 | 0.88  |
| ILMN_1755942 | GPR120    | 4.42E-05 | -0.33 |
| ILMN_2345898 | SLA       | 4.59E-05 | -0.86 |
| ILMN_1758864 | VNN2      | 4.61E-05 | -0.84 |
| ILMN_1676984 | DDIT3     | 4.65E-05 | 1.03  |
| ILMN_2138765 | PLIN2     | 4.77E-05 | 0.85  |
| ILMN_2367883 | GEM       | 4.77E-05 | 0.77  |
| ILMN_1670145 | DFNA5     | 4.79E-05 | 0.86  |
| ILMN_1709728 | SLC30A5   | 4.83E-05 | 0.65  |
| ILMN_1722622 | CD163     | 4.86E-05 | -0.70 |
| ILMN_2094396 | LRRRC8C   | 4.87E-05 | -0.55 |
| ILMN_2401258 | FAM13A    | 4.92E-05 | -0.63 |
| ILMN_2294978 | RNASE4    | 4.96E-05 | -0.54 |
| ILMN_1675797 | EPDR1     | 5.02E-05 | 0.76  |
| ILMN_1784871 | FASN      | 5.02E-05 | 0.72  |
| ILMN_2392569 | FPR2      | 5.23E-05 | -0.68 |
| ILMN_1793410 | SNTB1     | 5.23E-05 | 0.64  |
| ILMN_1667371 | SLA       | 5.23E-05 | -0.93 |
| ILMN_1849494 |           | 5.23E-05 | 0.49  |
| ILMN_1665107 | ITGB1BP1  | 5.32E-05 | 0.79  |
| ILMN_1689200 | DHDH      | 5.40E-05 | 0.84  |

|              |           |          |       |
|--------------|-----------|----------|-------|
| ILMN_1696317 | CACNA2D4  | 5.44E-05 | -0.57 |
| ILMN_1726704 | RSC1A1    | 5.44E-05 | 0.41  |
| ILMN_2359945 | CES1      | 5.44E-05 | 0.62  |
| ILMN_2038777 | ACTB      | 5.48E-05 | -0.78 |
| ILMN_2075643 | ANKRD29   | 5.49E-05 | 0.78  |
| ILMN_1695246 | KLHDC8B   | 5.60E-05 | 0.76  |
| ILMN_1702899 | PLEKHA7   | 5.61E-05 | -0.27 |
| ILMN_2310896 | NLRP3     | 5.61E-05 | -0.78 |
| ILMN_2094266 | HES2      | 5.62E-05 | 1.31  |
| ILMN_1717477 | PSD3      | 5.62E-05 | 0.67  |
| ILMN_2401873 | DUSP10    | 5.66E-05 | 0.57  |
| ILMN_1678579 | CPT2      | 5.68E-05 | -0.59 |
| ILMN_1674243 | TFRC      | 5.80E-05 | 0.95  |
| ILMN_1811110 | TDRD9     | 5.91E-05 | 0.47  |
| ILMN_1755364 | RALA      | 5.91E-05 | 0.59  |
| ILMN_1753183 | CDCA4     | 5.95E-05 | 0.38  |
| ILMN_1764030 | CCL23     | 5.99E-05 | -0.71 |
| ILMN_1726981 | VEGFB     | 6.01E-05 | 0.61  |
| ILMN_1793950 | P704P     | 6.06E-05 | -0.41 |
| ILMN_1772224 | KCNJ5     | 6.10E-05 | 0.76  |
| ILMN_1654612 | ZNF589    | 6.10E-05 | 0.59  |
| ILMN_1671554 | LPIN1     | 6.14E-05 | 0.74  |
| ILMN_1704531 | PTGR1     | 6.14E-05 | 0.68  |
| ILMN_1775501 | IL1B      | 6.20E-05 | -1.31 |
| ILMN_1789130 | DNASE2B   | 6.31E-05 | 1.03  |
| ILMN_1748473 | GIMAP4    | 6.40E-05 | -0.83 |
| ILMN_1678143 | ARHGDI3   | 6.40E-05 | -0.57 |
| ILMN_1700143 | FRMD4B    | 6.44E-05 | -0.55 |
| ILMN_1714278 | C9orf30   | 6.49E-05 | 0.74  |
| ILMN_2053178 | ACTG1     | 6.49E-05 | -0.56 |
| ILMN_1670325 | SLC47A1   | 6.49E-05 | 0.65  |
| ILMN_1865764 |           | 6.49E-05 | -0.66 |
| ILMN_1745811 | TDRD3     | 6.56E-05 | 0.69  |
| ILMN_2184373 | IL8       | 6.56E-05 | 0.71  |
| ILMN_1707088 | DENND2D   | 6.56E-05 | 0.61  |
| ILMN_1803676 | ENOSF1    | 6.66E-05 | 0.57  |
| ILMN_1805902 | ELA1      | 6.72E-05 | -0.31 |
| ILMN_1709204 | CLEC4A    | 6.75E-05 | -0.89 |
| ILMN_1778240 | GFOD1     | 6.76E-05 | 0.56  |
| ILMN_1655068 | TOM1L2    | 6.78E-05 | 0.53  |
| ILMN_3250257 | ACVRL1    | 6.78E-05 | -0.89 |
| ILMN_1663631 | BANP      | 6.80E-05 | 0.83  |
| ILMN_1666545 | GCNT1     | 6.91E-05 | -0.77 |
| ILMN_1760121 | RRAGC     | 6.91E-05 | 0.59  |
| ILMN_1752755 | VWF       | 6.96E-05 | 0.91  |
| ILMN_1910120 | LOC730092 | 6.97E-05 | 0.60  |

|              |              |          |       |
|--------------|--------------|----------|-------|
| ILMN_1769245 | GLIPR1       | 6.97E-05 | -0.63 |
| ILMN_1672608 | PPAP2B       | 7.00E-05 | 0.45  |
| ILMN_1697802 | LOC654244    | 7.15E-05 | 0.40  |
| ILMN_1725791 | PTPLA        | 7.16E-05 | 0.55  |
| ILMN_1704537 | PHGDH        | 7.18E-05 | 1.55  |
| ILMN_1653026 | PLAC8        | 7.20E-05 | -1.02 |
| ILMN_1704961 | ACTG1        | 7.20E-05 | -0.82 |
| ILMN_2093343 | PLAC8        | 7.20E-05 | -1.14 |
| ILMN_1758939 | RIPK2        | 7.61E-05 | 0.96  |
| ILMN_1685490 | TEX14        | 7.65E-05 | 0.34  |
| ILMN_1735680 | TMEM30A      | 7.80E-05 | -0.49 |
| ILMN_1719986 | PIK3IP1      | 7.82E-05 | 0.61  |
| ILMN_1809483 | HSD17B14     | 7.92E-05 | 0.55  |
| ILMN_1693210 | NSMCE2       | 8.01E-05 | 0.67  |
| ILMN_1752510 | FAM13A       | 8.01E-05 | -0.69 |
| ILMN_1739792 | RHOG         | 8.12E-05 | -0.68 |
| ILMN_2136971 | FABP3        | 8.12E-05 | 0.53  |
| ILMN_1764090 | AK3L1        | 8.17E-05 | 0.62  |
| ILMN_1720965 | TULP4        | 8.37E-05 | 0.55  |
| ILMN_2170814 | LAMP3        | 8.37E-05 | -0.77 |
| ILMN_1677085 | RGS19        | 8.37E-05 | -0.57 |
| ILMN_3243061 | SIGLEC14     | 8.37E-05 | -0.66 |
| ILMN_3190833 | CCRL2        | 8.55E-05 | 1.01  |
| ILMN_1708611 | RDX          | 8.55E-05 | 0.94  |
| ILMN_1807529 | PADI4        | 8.64E-05 | -0.24 |
| ILMN_1706498 | DSE          | 8.73E-05 | -0.69 |
| ILMN_1733259 | ADORA3       | 8.73E-05 | -0.70 |
| ILMN_2275742 | DNASE2B      | 8.73E-05 | 0.96  |
| ILMN_1722855 | VEGFB        | 8.85E-05 | 0.45  |
| ILMN_1812759 | GCH1         | 8.94E-05 | -0.44 |
| ILMN_1804863 | FKBP15       | 8.95E-05 | 0.76  |
| ILMN_1741350 | CEP70        | 9.00E-05 | 0.41  |
| ILMN_2400922 | OPRL1        | 9.00E-05 | -0.69 |
| ILMN_3242105 | LOC100134073 | 9.21E-05 | -0.47 |
| ILMN_3306997 | METTL1       | 9.21E-05 | 0.71  |
| ILMN_2404512 | PSEN2        | 9.21E-05 | 0.64  |
| ILMN_2400326 | DYRK3        | 9.21E-05 | 0.55  |
| ILMN_2401878 | DUSP10       | 9.25E-05 | 0.58  |
| ILMN_2253732 | ST8SIA4      | 9.34E-05 | -0.75 |
| ILMN_1677768 | POR          | 9.34E-05 | 0.53  |
| ILMN_1808047 | PHC2         | 9.43E-05 | -0.41 |
| ILMN_1761199 | SLCO2B1      | 9.43E-05 | -0.83 |
| ILMN_1665945 | ACBD3        | 9.57E-05 | 0.68  |
| ILMN_1654370 | TESK2        | 9.62E-05 | 0.36  |
| ILMN_1735930 | KLF2         | 9.77E-05 | -0.46 |
| ILMN_1738578 | FILIP1L      | 9.77E-05 | -0.31 |

|              |           |          |       |
|--------------|-----------|----------|-------|
| ILMN_2254962 | ACSS2     | 9.77E-05 | 0.47  |
| ILMN_2154053 | FVT1      | 9.78E-05 | 0.53  |
| ILMN_2352953 | CPM       | 9.90E-05 | 0.41  |
| ILMN_1743130 | PTGFRN    | 9.94E-05 | -0.38 |
| ILMN_1803988 | MCL1      | 9.97E-05 | -0.54 |
| ILMN_1669617 | GRB10     | 9.99E-05 | 0.40  |
| ILMN_1733276 | CYSLTR1   | 9.99E-05 | -0.45 |
| ILMN_2198812 | FDX1      | 1.00E-04 | 0.63  |
| ILMN_1789361 | PKD2L1    | 1.00E-04 | 0.84  |
| ILMN_2054297 | PTGS2     | 1.00E-04 | -0.50 |
| ILMN_1680782 | PATL1     | 1.01E-04 | 0.51  |
| ILMN_1700610 | CLEC7A    | 1.02E-04 | -0.55 |
| ILMN_1764709 | MAFB      | 1.03E-04 | -0.65 |
| ILMN_1811364 | SGPP2     | 1.03E-04 | 0.69  |
| ILMN_3229324 | SGK1      | 1.03E-04 | 0.65  |
| ILMN_1706094 | HECTD1    | 1.03E-04 | 0.72  |
| ILMN_1689585 | C20orf194 | 1.04E-04 | 0.55  |
| ILMN_1672662 | SLC20A1   | 1.06E-04 | 0.61  |
| ILMN_1709820 | AOAH      | 1.07E-04 | -0.56 |
| ILMN_1710075 | FAM89A    | 1.07E-04 | 0.63  |
| ILMN_1681101 | 42064     | 1.07E-04 | -0.67 |
| ILMN_1671516 | CIR1      | 1.07E-04 | 1.56  |
| ILMN_2379599 | CD163     | 1.07E-04 | -0.71 |
| ILMN_1755075 | IDI1      | 1.08E-04 | 0.68  |
| ILMN_1788347 | KIAA1737  | 1.08E-04 | 0.57  |
| ILMN_1771026 | GARS      | 1.09E-04 | 0.61  |
| ILMN_1713934 | LITAF     | 1.09E-04 | 0.59  |
| ILMN_1801504 | RUNX1     | 1.09E-04 | -0.50 |
| ILMN_2246328 | PTPN22    | 1.09E-04 | -0.58 |
| ILMN_1795089 | RASAL3    | 1.09E-04 | -0.64 |
| ILMN_1682316 | TRIM33    | 1.09E-04 | 0.61  |
| ILMN_1787529 | C3AR1     | 1.11E-04 | -0.60 |
| ILMN_2394161 | ST8SIA4   | 1.12E-04 | -0.37 |
| ILMN_3247506 | FCGR1C    | 1.12E-04 | -0.51 |
| ILMN_2351930 | TRIM33    | 1.13E-04 | 0.70  |
| ILMN_1787127 | SLC43A2   | 1.13E-04 | -0.79 |
| ILMN_1720829 | ZFP36     | 1.14E-04 | -0.76 |
| ILMN_3237329 | FNIP2     | 1.14E-04 | 0.89  |
| ILMN_1690099 | ITGB1BP1  | 1.14E-04 | 0.73  |
| ILMN_2323992 | CLEC7A    | 1.15E-04 | -0.71 |
| ILMN_1766487 | LRRRC25   | 1.18E-04 | -0.40 |
| ILMN_1712389 | CKLF      | 1.20E-04 | -0.59 |
| ILMN_1780334 | KCNJ2     | 1.20E-04 | -0.66 |
| ILMN_1666049 | NUP214    | 1.20E-04 | -0.60 |
| ILMN_1657892 | TLR8      | 1.20E-04 | -0.67 |
| ILMN_1912287 |           | 1.20E-04 | 0.64  |

|              |           |          |       |
|--------------|-----------|----------|-------|
| ILMN_1664631 | ADAM28    | 1.20E-04 | -0.38 |
| ILMN_1661343 | TNFSF14   | 1.20E-04 | 0.39  |
| ILMN_2161556 | C12orf49  | 1.20E-04 | 0.43  |
| ILMN_2089329 | SPRY2     | 1.22E-04 | -0.67 |
| ILMN_1801864 | LOC730455 | 1.23E-04 | 0.58  |
| ILMN_1733515 | LOXL3     | 1.24E-04 | -0.40 |
| ILMN_1755658 | ABI3      | 1.24E-04 | -0.55 |
| ILMN_2140990 | CAMK1     | 1.28E-04 | -0.68 |
| ILMN_2234697 | BEX1      | 1.30E-04 | -1.28 |
| ILMN_1773963 | GNA15     | 1.30E-04 | -0.57 |
| ILMN_1726245 | TGFBR2    | 1.33E-04 | -0.67 |
| ILMN_1772786 | KIF16B    | 1.34E-04 | 0.46  |
| ILMN_1760727 | ANG       | 1.35E-04 | -0.65 |
| ILMN_2290118 | MEGF9     | 1.36E-04 | -0.52 |
| ILMN_1769229 | BCL2A1    | 1.36E-04 | 0.73  |
| ILMN_2102330 | COL8A2    | 1.36E-04 | 0.72  |
| ILMN_2053415 | LDLR      | 1.36E-04 | 0.81  |
| ILMN_1762713 | C19orf59  | 1.38E-04 | -0.72 |
| ILMN_2221046 | GM2A      | 1.39E-04 | 0.59  |
| ILMN_1655414 | TNFSF14   | 1.39E-04 | 0.90  |
| ILMN_1692785 | KLHL21    | 1.39E-04 | 0.41  |
| ILMN_1677092 | GEM       | 1.39E-04 | 0.73  |
| ILMN_2207504 | LEP       | 1.40E-04 | 1.46  |
| ILMN_1676213 | SRPX2     | 1.42E-04 | -0.42 |
| ILMN_2381899 | OPTN      | 1.43E-04 | 0.60  |
| ILMN_2374249 | DYRK2     | 1.43E-04 | 0.55  |
| ILMN_2150196 | LRRC25    | 1.44E-04 | -0.61 |
| ILMN_2342579 | IL7R      | 1.48E-04 | -0.78 |
| ILMN_1681301 | AIM2      | 1.49E-04 | -0.73 |
| ILMN_1663866 | TGFBI     | 1.49E-04 | -0.85 |
| ILMN_1670353 | RAD51AP1  | 1.49E-04 | 0.53  |
| ILMN_1774077 | GBP2      | 1.49E-04 | -0.62 |
| ILMN_1678939 | VNN2      | 1.50E-04 | -0.73 |
| ILMN_1653652 | PTPRC     | 1.52E-04 | -0.54 |
| ILMN_1719867 | RNF13     | 1.52E-04 | 0.63  |
| ILMN_2339835 | PTGS1     | 1.52E-04 | -0.62 |
| ILMN_2203271 | FPR3      | 1.52E-04 | -0.60 |
| ILMN_1651496 | HIST1H2BD | 1.53E-04 | -0.56 |
| ILMN_1747622 | CD33      | 1.53E-04 | -0.56 |
| ILMN_1796349 | SMPDL3A   | 1.54E-04 | -0.66 |
| ILMN_1796216 | VASH1     | 1.55E-04 | -0.66 |
| ILMN_1697554 | SASH3     | 1.55E-04 | -0.51 |
| ILMN_1749338 | ANKRD29   | 1.60E-04 | 0.32  |
| ILMN_1806908 | PRKCB1    | 1.68E-04 | 0.57  |
| ILMN_1708743 | NT5DC2    | 1.70E-04 | -0.37 |
| ILMN_1668863 | LYPD1     | 1.70E-04 | -0.76 |

|              |           |          |       |
|--------------|-----------|----------|-------|
| ILMN_1737918 | C1QA      | 1.70E-04 | -0.55 |
| ILMN_1726873 | TPCN2     | 1.70E-04 | 0.57  |
| ILMN_2140999 | ZFYVE16   | 1.70E-04 | 0.51  |
| ILMN_1727309 | FAM82A2   | 1.70E-04 | 0.55  |
| ILMN_1742544 | MEF2C     | 1.70E-04 | -0.58 |
| ILMN_1743711 | LOC650215 | 1.70E-04 | 0.62  |
| ILMN_1674811 | OASL      | 1.71E-04 | -0.51 |
| ILMN_1757210 | CALML4    | 1.71E-04 | -0.60 |
| ILMN_1803788 | LGALS3    | 1.72E-04 | 0.76  |
| ILMN_1681252 | C17orf44  | 1.74E-04 | -0.52 |
| ILMN_1766169 | BCAT1     | 1.75E-04 | 0.59  |
| ILMN_3279712 | LOC642590 | 1.76E-04 | 0.58  |
| ILMN_1775962 | MCOLN3    | 1.77E-04 | 0.51  |
| ILMN_1783846 | RAPH1     | 1.78E-04 | -0.40 |
| ILMN_1711617 | GMFG      | 1.79E-04 | -0.63 |
| ILMN_2413644 | TM4SF19   | 1.79E-04 | 0.80  |
| ILMN_1748093 | PAFAH1B3  | 1.82E-04 | 0.63  |
| ILMN_1714765 | LOC389590 | 1.87E-04 | 0.50  |
| ILMN_1764964 | IFNGR2    | 1.89E-04 | -0.62 |
| ILMN_1686109 | CCL23     | 1.89E-04 | -0.68 |
| ILMN_1757186 | GIMAP1    | 1.90E-04 | -0.86 |
| ILMN_1755926 | DBI       | 1.91E-04 | 0.54  |
| ILMN_1791057 | IFNAR2    | 1.94E-04 | -0.55 |
| ILMN_1701386 | STRADB    | 1.94E-04 | 0.48  |
| ILMN_1811330 | FAM134B   | 1.95E-04 | 0.94  |
| ILMN_1770290 | CNN2      | 1.96E-04 | -0.56 |
| ILMN_1659544 | STX3      | 2.00E-04 | 0.49  |
| ILMN_2097858 | KIAA1737  | 2.01E-04 | 0.56  |
| ILMN_1664718 | CYP51A1   | 2.03E-04 | 0.52  |
| ILMN_1860638 |           | 2.03E-04 | 0.43  |
| ILMN_1669831 | C6orf192  | 2.03E-04 | 0.61  |
| ILMN_2337655 | WARS      | 2.06E-04 | 0.67  |
| ILMN_1711102 | B3GNT2    | 2.07E-04 | 0.54  |
| ILMN_1785071 | SEPP1     | 2.08E-04 | -0.84 |
| ILMN_1843198 |           | 2.10E-04 | 0.81  |
| ILMN_1683859 | SLC7A1    | 2.12E-04 | 0.56  |
| ILMN_1683475 | TOMM40    | 2.12E-04 | 0.84  |
| ILMN_1814194 | TCF4      | 2.14E-04 | -0.57 |
| ILMN_1664464 | PTGDS     | 2.15E-04 | 0.60  |
| ILMN_1708672 | ACAT2     | 2.20E-04 | 0.88  |
| ILMN_1679620 | LOC728519 | 2.20E-04 | -0.64 |
| ILMN_1681590 | LARP1     | 2.21E-04 | 0.43  |
| ILMN_1663142 | CLEC12A   | 2.22E-04 | -0.53 |
| ILMN_1742859 | ACSS2     | 2.22E-04 | 0.47  |
| ILMN_1723962 | LXN       | 2.22E-04 | 0.60  |
| ILMN_1773125 | ENTPD1    | 2.22E-04 | -0.59 |

|              |           |          |       |
|--------------|-----------|----------|-------|
| ILMN_1663042 | SDC4      | 2.25E-04 | 0.42  |
| ILMN_1656194 | TSPAN10   | 2.25E-04 | 1.04  |
| ILMN_1668063 | FCN1      | 2.27E-04 | -0.72 |
| ILMN_1724789 | CD59      | 2.27E-04 | 0.37  |
| ILMN_2145116 | TMEM173   | 2.27E-04 | -0.56 |
| ILMN_1745116 | ABHD12    | 2.28E-04 | 0.52  |
| ILMN_1801254 | LOC648984 | 2.28E-04 | -0.54 |
| ILMN_1772292 | LOC653752 | 2.32E-04 | 0.37  |
| ILMN_2391150 | FILIP1L   | 2.33E-04 | -0.31 |
| ILMN_1709484 | BLM       | 2.36E-04 | 0.22  |
| ILMN_1680109 | COL4A3BP  | 2.36E-04 | 0.61  |
| ILMN_1774547 | MPRIP     | 2.36E-04 | -0.40 |
| ILMN_1797293 | SIGLEC15  | 2.36E-04 | 0.46  |
| ILMN_1736597 | TKT       | 2.37E-04 | 0.52  |
| ILMN_1685057 | SLC22A4   | 2.37E-04 | -0.31 |
| ILMN_1807556 | LOC146177 | 2.38E-04 | -0.33 |
| ILMN_1757347 | C22orf9   | 2.39E-04 | 0.39  |
| ILMN_1704873 | TCEB1     | 2.39E-04 | 0.56  |
| ILMN_1745964 | IRAK2     | 2.39E-04 | 0.58  |
| ILMN_1679782 | BLOC1S2   | 2.42E-04 | 0.57  |
| ILMN_1730906 | FILIP1L   | 2.44E-04 | -0.28 |
| ILMN_1687284 | USP12     | 2.46E-04 | 0.45  |
| ILMN_2225318 | SMS       | 2.47E-04 | 0.60  |
| ILMN_1683755 | SOX13     | 2.50E-04 | 0.56  |
| ILMN_2264011 | GRAP      | 2.50E-04 | -0.43 |
| ILMN_1659801 | ATP6V1C1  | 2.51E-04 | 0.39  |
| ILMN_1906187 |           | 2.54E-04 | 0.36  |
| ILMN_2356838 | CEPT1     | 2.61E-04 | -0.53 |
| ILMN_2375484 | CPEB2     | 2.61E-04 | 0.62  |
| ILMN_2066020 | TCEB1     | 2.64E-04 | 0.57  |
| ILMN_1786444 | LPL       | 2.65E-04 | -0.58 |
| ILMN_1689655 | HLA-DRA   | 2.66E-04 | -0.51 |
| ILMN_1701216 | BANP      | 2.66E-04 | 0.63  |
| ILMN_1656310 | INDO      | 2.66E-04 | -0.52 |
| ILMN_1719543 | MAF       | 2.67E-04 | -0.49 |
| ILMN_2269136 | AGAP3     | 2.69E-04 | 0.55  |
| ILMN_2339748 | RNF13     | 2.70E-04 | 0.62  |
| ILMN_1751941 | LOC728772 | 2.71E-04 | -0.52 |
| ILMN_1800626 | SESN1     | 2.74E-04 | -0.47 |
| ILMN_1799104 | SPAG9     | 2.74E-04 | 0.48  |
| ILMN_1717674 | PEPD      | 2.74E-04 | 0.49  |
| ILMN_1663257 | ATP6V1C1  | 2.80E-04 | 0.40  |
| ILMN_1792922 | SOD2      | 2.81E-04 | 0.41  |
| ILMN_2363392 | TNFSF14   | 2.83E-04 | 0.52  |
| ILMN_2077905 | PTGFRN    | 2.85E-04 | -0.26 |
| ILMN_1653856 | STS-1     | 2.85E-04 | -0.46 |



|              |           |          |       |
|--------------|-----------|----------|-------|
| ILMN_1674574 | VNN1      | 2.85E-04 | 0.35  |
| ILMN_1682312 | CYBB      | 2.87E-04 | -0.54 |
| ILMN_1743570 | CEACAM3   | 2.87E-04 | -0.30 |
| ILMN_1698323 | PLEKHB2   | 2.87E-04 | 0.65  |
| ILMN_1788931 | DOCK8     | 2.87E-04 | -0.46 |
| ILMN_1704369 | LIMA1     | 2.88E-04 | -0.48 |
| ILMN_1719696 | PLD1      | 2.88E-04 | 0.49  |
| ILMN_1727862 | HPS4      | 2.88E-04 | 0.31  |
| ILMN_1733270 | CD163     | 2.91E-04 | -0.72 |
| ILMN_1656818 | GPR141    | 2.93E-04 | -0.32 |
| ILMN_1770824 | ARHGAP4   | 3.01E-04 | -0.57 |
| ILMN_1754076 | CACNA2D3  | 3.01E-04 | -0.99 |
| ILMN_1659029 | FAM116B   | 3.03E-04 | -0.54 |
| ILMN_2208455 | DDHD1     | 3.05E-04 | 0.29  |
| ILMN_1750792 | VAC14     | 3.06E-04 | 0.21  |
| ILMN_1804988 | MOAP1     | 3.07E-04 | 0.52  |
| ILMN_1748915 | S100A12   | 3.14E-04 | -0.35 |
| ILMN_1740903 | C7orf49   | 3.20E-04 | -0.45 |
| ILMN_1763500 | GPR82     | 3.20E-04 | -0.24 |
| ILMN_1725675 | ABCC6     | 3.20E-04 | -0.19 |
| ILMN_1798543 | STK17B    | 3.25E-04 | -0.39 |
| ILMN_1867119 |           | 3.26E-04 | 1.09  |
| ILMN_2049184 | DNASE1L3  | 3.26E-04 | 0.28  |
| ILMN_2078599 | ACP5      | 3.26E-04 | 0.58  |
| ILMN_2408946 | PDE8A     | 3.26E-04 | 0.31  |
| ILMN_1656837 | RBP1      | 3.26E-04 | -0.38 |
| ILMN_1766079 | SULT1C2   | 3.28E-04 | 0.55  |
| ILMN_1771800 | PRKCA     | 3.29E-04 | -0.45 |
| ILMN_1724407 | TACC3     | 3.29E-04 | -0.40 |
| ILMN_1770338 | TM4SF1    | 3.30E-04 | 0.82  |
| ILMN_2129505 | CYBASC3   | 3.30E-04 | 0.72  |
| ILMN_1795918 | CENTG3    | 3.32E-04 | 0.52  |
| ILMN_1705570 | H2AFY2    | 3.32E-04 | 0.52  |
| ILMN_1725312 | RASA1     | 3.33E-04 | -0.58 |
| ILMN_1733324 | ITGB3     | 3.37E-04 | 0.30  |
| ILMN_1658628 | C14orf72  | 3.39E-04 | 0.27  |
| ILMN_1716766 | CEBPG     | 3.40E-04 | 0.46  |
| ILMN_1791186 | ARHGAP18  | 3.40E-04 | -0.45 |
| ILMN_1787265 | ZNF503    | 3.44E-04 | -0.43 |
| ILMN_1787657 | CLDN12    | 3.45E-04 | 0.43  |
| ILMN_1723912 | IFI44L    | 3.53E-04 | -0.56 |
| ILMN_1736441 | PDXP      | 3.53E-04 | 0.46  |
| ILMN_1769546 | RIN2      | 3.53E-04 | -0.54 |
| ILMN_1702320 | JAKMIP2   | 3.53E-04 | 0.46  |
| ILMN_1718977 | GADD45B   | 3.54E-04 | 0.34  |
| ILMN_1744113 | TNFAIP8L2 | 3.54E-04 | -0.45 |

|              |           |          |       |
|--------------|-----------|----------|-------|
| ILMN_1713124 | AKR1C3    | 3.55E-04 | 0.56  |
| ILMN_1743275 | SH3RF3    | 3.58E-04 | 0.40  |
| ILMN_1808404 | RHBDF1    | 3.64E-04 | 0.67  |
| ILMN_1667711 | HRASLS3   | 3.67E-04 | 0.45  |
| ILMN_1683923 | MT1H      | 3.72E-04 | -0.59 |
| ILMN_2319588 | OSGIN1    | 3.72E-04 | 0.30  |
| ILMN_1699772 | RRAGD     | 3.72E-04 | 0.60  |
| ILMN_1710495 | PAPLN     | 3.73E-04 | 0.43  |
| ILMN_2340919 | GRB10     | 3.76E-04 | 0.26  |
| ILMN_1714197 | ACSS2     | 3.77E-04 | 0.49  |
| ILMN_1701621 | SCO2      | 3.78E-04 | -0.58 |
| ILMN_1708248 | LILRB1    | 3.78E-04 | -0.26 |
| ILMN_1763638 | BCAR3     | 3.87E-04 | 0.45  |
| ILMN_1802292 | WDFY2     | 3.87E-04 | -0.44 |
| ILMN_1716264 | ANKRD1    | 3.87E-04 | 0.60  |
| ILMN_1686989 | INSIG1    | 3.91E-04 | 0.55  |
| ILMN_2136089 | MTE       | 3.91E-04 | -0.59 |
| ILMN_1664761 | TMEM138   | 4.04E-04 | 0.77  |
| ILMN_1762594 | NOD2      | 4.04E-04 | -0.40 |
| ILMN_1700955 | TCTEX1D2  | 4.20E-04 | 0.45  |
| ILMN_1814022 | NR1H3     | 4.21E-04 | 0.54  |
| ILMN_2172174 | NP        | 4.21E-04 | -0.44 |
| ILMN_1793201 | HAGHL     | 4.23E-04 | 0.46  |
| ILMN_3235221 | LOC644936 | 4.28E-04 | -0.68 |
| ILMN_1777061 | ZSWIM6    | 4.33E-04 | -0.58 |
| ILMN_1676067 | SEMA3G    | 4.36E-04 | -0.16 |
| ILMN_2168217 | EBI2      | 4.36E-04 | 0.50  |
| ILMN_1683313 | ST3GAL1   | 4.41E-04 | 0.54  |
| ILMN_1718982 | BEST1     | 4.44E-04 | -0.42 |
| ILMN_1728106 | TNF       | 4.44E-04 | -0.45 |
| ILMN_1800602 | GCA       | 4.44E-04 | -0.50 |
| ILMN_1684368 | C5orf62   | 4.46E-04 | 0.37  |
| ILMN_2374865 | ATF3      | 4.46E-04 | 0.73  |
| ILMN_1727466 | KCNMB4    | 4.46E-04 | -0.44 |
| ILMN_2377496 | ERCC1     | 4.49E-04 | -0.48 |
| ILMN_1793474 | INSIG1    | 4.54E-04 | 0.84  |
| ILMN_2403730 | ATP6V1H   | 4.54E-04 | 0.62  |
| ILMN_2165867 | DHCR7     | 4.55E-04 | 0.57  |
| ILMN_2284744 | HNMT      | 4.55E-04 | -0.64 |
| ILMN_3236945 | PTPMT1    | 4.57E-04 | 0.50  |
| ILMN_1768505 | IL13RA1   | 4.57E-04 | -0.51 |
| ILMN_1659936 | PPP1R15A  | 4.57E-04 | 0.69  |
| ILMN_1799024 | VAC14     | 4.57E-04 | 0.45  |
| ILMN_1676372 | CD209     | 4.59E-04 | -0.36 |
| ILMN_1770641 | KLHL3     | 4.61E-04 | -0.33 |
| ILMN_1789094 | NINL      | 4.61E-04 | 0.33  |

|              |           |          |       |
|--------------|-----------|----------|-------|
| ILMN_1784661 | TMEM2     | 4.64E-04 | -0.44 |
| ILMN_2267787 | HPS1      | 4.64E-04 | 0.59  |
| ILMN_1769926 | DBN1      | 4.64E-04 | -0.40 |
| ILMN_3235964 | HSPA7     | 4.64E-04 | -0.42 |
| ILMN_1804339 | CAMK1G    | 4.71E-04 | 0.24  |
| ILMN_1804822 | SRXN1     | 4.74E-04 | 0.69  |
| ILMN_2193706 | HRK       | 4.76E-04 | 0.48  |
| ILMN_1677511 | PTGS2     | 4.76E-04 | -0.26 |
| ILMN_1701906 | CD300C    | 4.81E-04 | -0.53 |
| ILMN_1690352 | ADO       | 4.84E-04 | 0.47  |
| ILMN_1779252 | TRIM22    | 4.85E-04 | -0.41 |
| ILMN_1731048 | TLR1      | 4.85E-04 | -0.52 |
| ILMN_1678671 | KLHL24    | 4.89E-04 | 0.44  |
| ILMN_2073604 | EBP       | 4.92E-04 | 0.57  |
| ILMN_1808325 | TM4SF19   | 4.92E-04 | 0.87  |
| ILMN_3226613 | LOC729686 | 4.93E-04 | 0.37  |
| ILMN_1677814 | ABCC3     | 4.94E-04 | -0.71 |
| ILMN_1715543 | ACOT1     | 4.97E-04 | 0.64  |
| ILMN_1653466 | HES4      | 4.98E-04 | 0.62  |
| ILMN_1802106 | APOBEC3G  | 4.98E-04 | -0.48 |
| ILMN_1670302 | HK3       | 4.98E-04 | -0.68 |
| ILMN_1775405 | ARL4A     | 4.98E-04 | 0.67  |
| ILMN_1708167 | CDCP1     | 4.98E-04 | -0.22 |
| ILMN_2173291 | CYP4B1    | 4.99E-04 | 0.26  |
| ILMN_2338197 | LINS1     | 5.00E-04 | 0.38  |
| ILMN_1652198 | CCM2      | 5.01E-04 | -0.39 |
| ILMN_1668012 | SLC25A13  | 5.04E-04 | 0.41  |
| ILMN_1810584 | IL1R1     | 5.04E-04 | 0.37  |
| ILMN_1780533 | RNASE6    | 5.06E-04 | -0.55 |
| ILMN_1705047 | TLR8      | 5.09E-04 | -0.60 |
| ILMN_2092850 | HPSE      | 5.13E-04 | -0.46 |
| ILMN_2182531 | C18orf55  | 5.13E-04 | -0.45 |
| ILMN_1711786 | NFE2      | 5.27E-04 | -0.28 |
| ILMN_2365465 | XBP1      | 5.37E-04 | 0.63  |
| ILMN_1772302 | MTHFS     | 5.45E-04 | 0.52  |
| ILMN_1726809 | BHLHB3    | 5.47E-04 | 0.61  |
| ILMN_1753135 | ALK       | 5.58E-04 | 0.86  |
| ILMN_1699574 | NRP1      | 5.72E-04 | -0.60 |
| ILMN_2188374 | XPOT      | 5.73E-04 | 0.52  |
| ILMN_1654560 | TLR6      | 5.74E-04 | -0.51 |
| ILMN_1663313 | AMY1C     | 5.81E-04 | -0.60 |
| ILMN_1913060 |           | 5.81E-04 | -0.63 |
| ILMN_1659285 | PSMG1     | 5.83E-04 | 0.49  |
| ILMN_2225537 | PTGR1     | 5.88E-04 | 0.61  |
| ILMN_2409384 | SIGLEC7   | 5.90E-04 | -0.38 |
| ILMN_1708534 | PAX8      | 5.91E-04 | 0.34  |

|              |           |          |       |
|--------------|-----------|----------|-------|
| ILMN_2171384 | CXCL5     | 5.95E-04 | -0.86 |
| ILMN_1696974 | ANG       | 5.95E-04 | -0.58 |
| ILMN_1739001 | TACSTD2   | 5.96E-04 | -0.59 |
| ILMN_1751789 | HNMT      | 5.98E-04 | -0.54 |
| ILMN_1716797 | CD302     | 5.98E-04 | -0.43 |
| ILMN_2041101 | ANXA2P1   | 5.98E-04 | 0.53  |
| ILMN_1675448 | ZFP36L1   | 5.98E-04 | -0.52 |
| ILMN_1727402 | HCLS1     | 5.98E-04 | -0.59 |
| ILMN_1755937 | ANXA2     | 5.99E-04 | 0.49  |
| ILMN_1738095 | PER2      | 6.04E-04 | -0.47 |
| ILMN_1658504 | CHKA      | 6.06E-04 | 0.50  |
| ILMN_1772387 | TLR2      | 6.09E-04 | -0.33 |
| ILMN_1681415 | SIGLEC7   | 6.10E-04 | -0.37 |
| ILMN_1796335 | LPCAT2    | 6.11E-04 | -0.62 |
| ILMN_1821176 |           | 6.13E-04 | -0.46 |
| ILMN_2329914 | SPRY1     | 6.16E-04 | 0.77  |
| ILMN_2198515 | ARRDC3    | 6.16E-04 | -0.36 |
| ILMN_1741014 | SLC28A3   | 6.18E-04 | 0.55  |
| ILMN_1766125 | LONP1     | 6.21E-04 | 0.41  |
| ILMN_1811736 | ENTHD1    | 6.21E-04 | 0.58  |
| ILMN_1710078 | TMEM181   | 6.27E-04 | 0.48  |
| ILMN_1716276 | CCL4L2    | 6.28E-04 | -0.42 |
| ILMN_2409167 | ANXA2     | 6.29E-04 | 0.40  |
| ILMN_1698100 | ANXA2P1   | 6.39E-04 | 0.46  |
| ILMN_1783805 | PNMA3     | 6.39E-04 | 0.35  |
| ILMN_1651296 | LOC143666 | 6.47E-04 | 0.21  |
| ILMN_2109197 | EPB41L3   | 6.54E-04 | -0.62 |
| ILMN_1654819 | ZNF589    | 6.56E-04 | 0.47  |
| ILMN_1790881 | HNMT      | 6.57E-04 | -0.56 |
| ILMN_2073289 | MTSS1     | 6.58E-04 | -0.47 |
| ILMN_2151739 | CAT       | 6.60E-04 | -0.54 |
| ILMN_3240222 | PRAGMIN   | 6.60E-04 | -0.50 |
| ILMN_1707585 | SLC46A2   | 6.60E-04 | -0.56 |
| ILMN_1655444 | LOC728492 | 6.62E-04 | 0.45  |
| ILMN_1693650 | FES       | 6.62E-04 | -0.66 |
| ILMN_2294976 | RNASE4    | 6.70E-04 | -0.48 |
| ILMN_1728639 | FCGR3B    | 6.71E-04 | -0.30 |
| ILMN_1775182 | GSR       | 6.81E-04 | 0.52  |
| ILMN_3248591 | LTBP2     | 6.81E-04 | -0.41 |
| ILMN_1749591 | ITGAL     | 6.81E-04 | -0.40 |
| ILMN_1725510 | DHCR24    | 6.81E-04 | 0.48  |
| ILMN_1792495 | AHNAK     | 7.02E-04 | 0.24  |
| ILMN_1700432 | ITPKB     | 7.03E-04 | 0.41  |
| ILMN_3237956 | ZC3H12C   | 7.06E-04 | 0.44  |
| ILMN_1733453 | LOC284988 | 7.09E-04 | 0.41  |
| ILMN_3200921 | LOC642590 | 7.09E-04 | 0.51  |

|              |               |          |       |
|--------------|---------------|----------|-------|
| ILMN_1694980 | NAGLU         | 7.16E-04 | 0.45  |
| ILMN_1729417 | GENE          | 7.18E-04 | 0.34  |
| ILMN_2216838 | DKFZP586I1420 | 7.20E-04 | -0.26 |
| ILMN_1746846 | TTLL4         | 7.22E-04 | 0.51  |
| ILMN_1781580 | BRI3          | 7.22E-04 | 0.54  |
| ILMN_1805643 | RILPL1        | 7.28E-04 | 0.53  |
| ILMN_2338963 | SLC29A1       | 7.35E-04 | 0.56  |
| ILMN_1812926 | ANTXR2        | 7.36E-04 | -0.56 |
| ILMN_2403228 | CLEC12A       | 7.39E-04 | -0.39 |
| ILMN_1671392 | KCNF1         | 7.44E-04 | 0.47  |
| ILMN_1786823 | ICAM2         | 7.44E-04 | -0.43 |
| ILMN_1806408 | ACADVL        | 7.44E-04 | -0.50 |
| ILMN_1689518 | PECAM1        | 7.47E-04 | -0.55 |
| ILMN_3247848 | NCRNA00085    | 7.56E-04 | -0.42 |
| ILMN_1783621 | CMPK2         | 7.62E-04 | 0.54  |
| ILMN_3248263 | CCDC93        | 7.64E-04 | 0.43  |
| ILMN_1657111 | C14orf78      | 7.67E-04 | 0.58  |
| ILMN_2249720 | LAT2          | 7.70E-04 | -0.17 |
| ILMN_1813625 | TRIM25        | 7.71E-04 | 0.33  |
| ILMN_1760778 | ENG           | 7.71E-04 | -0.60 |
| ILMN_2401253 | FAM13A        | 7.71E-04 | -0.34 |
| ILMN_1776157 | 42251         | 7.80E-04 | 0.48  |
| ILMN_2092333 | GPR141        | 7.81E-04 | -0.44 |
| ILMN_1662618 | SQSTM1        | 7.81E-04 | 0.46  |
| ILMN_2355033 | KIAA1147      | 7.81E-04 | -0.65 |
| ILMN_2144088 | FDFT1         | 7.86E-04 | 0.51  |
| ILMN_1815190 | METTL1        | 7.89E-04 | 0.58  |
| ILMN_1804396 | C14orf4       | 7.90E-04 | -0.52 |
| ILMN_1798006 | ANKRD35       | 7.90E-04 | -0.44 |
| ILMN_1789196 | TPM2          | 7.90E-04 | -0.26 |
| ILMN_2137312 | KCNJ5         | 7.92E-04 | 0.27  |
| ILMN_1723846 | FAM119B       | 7.92E-04 | 0.51  |
| ILMN_1750800 | ACO1          | 7.92E-04 | 0.51  |
| ILMN_1797310 | ATP6V1D       | 7.92E-04 | 0.48  |
| ILMN_1679995 | MPP6          | 7.98E-04 | 0.19  |
| ILMN_1724907 | NUDT3         | 7.99E-04 | -0.41 |
| ILMN_3199755 | LOC646821     | 8.01E-04 | -0.28 |
| ILMN_1670870 | ALCAM         | 8.01E-04 | -0.57 |
| ILMN_1798288 | MOBKL2C       | 8.05E-04 | -0.43 |
| ILMN_1730504 | AGPAT4        | 8.05E-04 | 0.37  |
| ILMN_1759818 | SORL1         | 8.06E-04 | -0.39 |
| ILMN_1652680 | LOC652616     | 8.13E-04 | -0.41 |
| ILMN_1660277 | LOC731999     | 8.13E-04 | 0.40  |
| ILMN_1680738 | C5orf13       | 8.13E-04 | 0.34  |
| ILMN_1695640 | PTPN22        | 8.13E-04 | -0.53 |
| ILMN_3236239 | LOC100129550  | 8.15E-04 | -0.59 |

|              |              |          |       |
|--------------|--------------|----------|-------|
| ILMN_1682930 | SIPA1        | 8.16E-04 | -0.55 |
| ILMN_1771019 | MTMR4        | 8.19E-04 | 0.49  |
| ILMN_3273209 | FLJ10489     | 8.19E-04 | 0.47  |
| ILMN_1767934 | PCSK5        | 8.24E-04 | -0.36 |
| ILMN_1696622 | SLC38A6      | 8.31E-04 | 0.44  |
| ILMN_1797728 | HMGCS1       | 8.31E-04 | 0.62  |
| ILMN_1745034 | SLC11A2      | 8.34E-04 | 0.45  |
| ILMN_1666733 | IL8          | 8.34E-04 | 0.63  |
| ILMN_1749006 | RCSD1        | 8.36E-04 | -0.38 |
| ILMN_2162972 | LYZ          | 8.42E-04 | -0.81 |
| ILMN_1733616 | TFEB         | 8.44E-04 | 0.28  |
| ILMN_1657977 | MSRB2        | 8.44E-04 | -0.51 |
| ILMN_2148785 | GBP1         | 8.54E-04 | -0.69 |
| ILMN_1792518 | STX7         | 8.57E-04 | 0.52  |
| ILMN_1797342 | FNBP1        | 8.57E-04 | -0.49 |
| ILMN_2329927 | ABCG1        | 8.57E-04 | -0.33 |
| ILMN_2352009 | ACADVL       | 8.57E-04 | -0.32 |
| ILMN_1765557 | OLFML2B      | 8.63E-04 | -0.56 |
| ILMN_1657708 | MGLL         | 8.64E-04 | 0.38  |
| ILMN_1774761 | CCR2         | 8.66E-04 | -0.24 |
| ILMN_1748258 | LINS1        | 8.76E-04 | 0.23  |
| ILMN_1784553 | SDC2         | 8.77E-04 | -0.45 |
| ILMN_1691846 | G0S2         | 8.79E-04 | 0.44  |
| ILMN_1655117 | WDR19        | 8.81E-04 | 0.38  |
| ILMN_1695759 | AMDHD2       | 8.83E-04 | 0.45  |
| ILMN_1730622 | EVL          | 8.86E-04 | -0.41 |
| ILMN_2088124 | TMEM154      | 8.88E-04 | -0.29 |
| ILMN_1685009 | ITGAM        | 8.90E-04 | -0.44 |
| ILMN_1658176 | ABCG1        | 9.02E-04 | 0.94  |
| ILMN_1664691 | DAPP1        | 9.11E-04 | -0.32 |
| ILMN_1757732 | OSGIN2       | 9.18E-04 | 0.48  |
| ILMN_1798256 | UPP1         | 9.18E-04 | 0.80  |
| ILMN_1756937 | ST8SIA4      | 9.18E-04 | -0.38 |
| ILMN_3268914 | LOC100128410 | 9.21E-04 | 0.48  |
| ILMN_2336595 | ACSS2        | 9.21E-04 | 0.42  |
| ILMN_1680397 | IL8RB        | 9.21E-04 | -0.23 |
| ILMN_1727284 | CD4          | 9.22E-04 | -0.41 |
| ILMN_1720452 | LONRF3       | 9.22E-04 | 0.37  |
| ILMN_1796976 | NLRC4        | 9.22E-04 | -0.38 |
| ILMN_3240900 | LOC100134728 | 9.31E-04 | -0.46 |
| ILMN_1740742 | UROD         | 9.31E-04 | 0.46  |
| ILMN_1714417 | PSEN2        | 9.33E-04 | 0.62  |
| ILMN_1743241 | ARL4A        | 9.38E-04 | 0.29  |
| ILMN_2406501 | SOD2         | 9.39E-04 | 0.58  |
| ILMN_2214678 | MXD1         | 9.55E-04 | -0.53 |
| ILMN_1698777 | ADCK1        | 9.76E-04 | 0.30  |

|              |              |          |       |
|--------------|--------------|----------|-------|
| ILMN_1720889 | SC4MOL       | 9.82E-04 | 0.78  |
| ILMN_1756696 | USF2         | 9.84E-04 | 0.46  |
| ILMN_1811719 | MYO7A        | 9.87E-04 | -0.24 |
| ILMN_1721344 | MOBK2A       | 9.87E-04 | -0.44 |
| ILMN_1798706 | EBI2         | 9.87E-04 | 0.51  |
| ILMN_1707720 | SLC1A5       | 9.89E-04 | 0.46  |
| ILMN_3249667 | LOC100133678 | 9.92E-04 | -0.64 |
| ILMN_1803392 | TAX1BP3      | 9.98E-04 | -0.47 |
| ILMN_1659470 | PBRM1        | 1.00E-03 | 0.37  |
| ILMN_1749070 | HLA-DPB1     | 1.00E-03 | -0.32 |
| ILMN_2228035 | HS3ST1       | 1.00E-03 | -0.42 |
| ILMN_1701248 | TREM2        | 1.02E-03 | -0.53 |
| ILMN_1744212 | INPP5D       | 1.02E-03 | -0.51 |
| ILMN_2154455 | ZNF330       | 1.02E-03 | 0.41  |
| ILMN_1685625 | UCP2         | 1.02E-03 | -0.45 |
| ILMN_1743806 | MIF4GD       | 1.03E-03 | -0.47 |
| ILMN_1794588 | DYRK2        | 1.03E-03 | 0.38  |
| ILMN_1670096 | NRBP1        | 1.03E-03 | 0.35  |
| ILMN_1687858 | CALM2        | 1.04E-03 | -0.42 |
| ILMN_2368318 | FGR          | 1.04E-03 | 0.49  |
| ILMN_1727798 | MOSPD1       | 1.06E-03 | 0.46  |
| ILMN_1765858 | CAB39        | 1.07E-03 | -0.42 |
| ILMN_1799744 | GALC         | 1.07E-03 | -0.51 |
| ILMN_1788283 | COTL1        | 1.07E-03 | -0.50 |
| ILMN_1766637 | GLA          | 1.07E-03 | 0.46  |
| ILMN_1808354 | SLC4A7       | 1.09E-03 | -0.47 |
| ILMN_1743783 | CCDC43       | 1.10E-03 | 0.40  |
| ILMN_2384591 | HN1          | 1.10E-03 | -0.48 |
| ILMN_1801077 | PLIN2        | 1.12E-03 | 0.75  |
| ILMN_1780582 | CD83         | 1.12E-03 | 0.49  |
| ILMN_1739050 | PIPOX        | 1.12E-03 | -0.20 |
| ILMN_1832208 |              | 1.12E-03 | 0.59  |
| ILMN_1761247 | PIR          | 1.12E-03 | 0.50  |
| ILMN_2185845 | BRSK1        | 1.12E-03 | -0.54 |
| ILMN_2285817 | FAM89A       | 1.12E-03 | 0.53  |
| ILMN_1733311 | PIGB         | 1.13E-03 | -0.34 |
| ILMN_1729691 | SLC16A6      | 1.13E-03 | 0.42  |
| ILMN_1782560 | CD86         | 1.13E-03 | -0.52 |
| ILMN_2348487 | EMR3         | 1.13E-03 | -0.46 |
| ILMN_3241554 | KANK4        | 1.14E-03 | 0.46  |
| ILMN_1751561 | CAMK1D       | 1.14E-03 | 0.28  |
| ILMN_1763828 | MTF1         | 1.15E-03 | -0.37 |
| ILMN_1698766 | PYCARD       | 1.15E-03 | -0.46 |
| ILMN_1773742 | DNAJB9       | 1.15E-03 | 0.48  |
| ILMN_1711608 | SSBP2        | 1.15E-03 | -0.44 |
| ILMN_1788192 | ARMCX1       | 1.16E-03 | 0.45  |

|              |           |          |       |
|--------------|-----------|----------|-------|
| ILMN_3240586 | PLD6      | 1.16E-03 | 0.38  |
| ILMN_1672176 | SMPD2     | 1.16E-03 | 0.25  |
| ILMN_1768176 | CXorf26   | 1.16E-03 | 0.49  |
| ILMN_1689473 | ATP6V1H   | 1.16E-03 | 0.45  |
| ILMN_1847308 |           | 1.16E-03 | -0.36 |
| ILMN_2135272 | GIMAP2    | 1.16E-03 | -0.47 |
| ILMN_2232712 | MYO10     | 1.16E-03 | 0.31  |
| ILMN_2340217 | PTPRC     | 1.17E-03 | -0.50 |
| ILMN_1670263 | C1orf71   | 1.17E-03 | 0.48  |
| ILMN_1715885 | PTPN22    | 1.17E-03 | -0.41 |
| ILMN_2232520 | ANKRD28   | 1.18E-03 | 0.30  |
| ILMN_1688480 | CCND1     | 1.18E-03 | -0.47 |
| ILMN_1723971 | SLC29A1   | 1.19E-03 | 0.64  |
| ILMN_1776649 | LRRK2     | 1.19E-03 | -0.52 |
| ILMN_1692535 | DPP4      | 1.20E-03 | 0.38  |
| ILMN_3251686 | UBTD2     | 1.20E-03 | 0.44  |
| ILMN_1810199 | ASRGL1    | 1.20E-03 | 0.42  |
| ILMN_1735014 | KLF6      | 1.20E-03 | 0.49  |
| ILMN_1656045 | BRUNOL6   | 1.21E-03 | 0.25  |
| ILMN_2205896 | MEIS3P1   | 1.22E-03 | -0.41 |
| ILMN_1712390 | CUTA      | 1.22E-03 | 0.49  |
| ILMN_3289508 | LOC339192 | 1.22E-03 | -0.54 |
| ILMN_1723412 | ASCL2     | 1.22E-03 | -0.49 |
| ILMN_1790471 | CICE      | 1.23E-03 | 0.57  |
| ILMN_1711514 | COCH      | 1.24E-03 | -0.27 |
| ILMN_1697309 | NCF1      | 1.24E-03 | -0.60 |
| ILMN_1672596 | BCAR1     | 1.24E-03 | 0.25  |
| ILMN_1774380 | LOC650898 | 1.24E-03 | 0.31  |
| ILMN_3236428 | TMEM170B  | 1.25E-03 | -0.38 |
| ILMN_2283597 | FAM134B   | 1.25E-03 | 1.06  |
| ILMN_1789638 | MFSD2     | 1.25E-03 | 0.23  |
| ILMN_1770085 | BTG2      | 1.25E-03 | -0.44 |
| ILMN_1657862 | AHCY      | 1.27E-03 | 0.44  |
| ILMN_1668721 | CCND3     | 1.28E-03 | -0.47 |
| ILMN_1652280 | FBXO32    | 1.28E-03 | 0.35  |
| ILMN_1779264 | PSMG1     | 1.30E-03 | 0.48  |
| ILMN_1660806 | CSRP2     | 1.30E-03 | 0.51  |
| ILMN_2352077 | KL        | 1.30E-03 | -0.25 |
| ILMN_1727271 | WARS      | 1.31E-03 | 0.63  |
| ILMN_1725079 | TSPAN31   | 1.31E-03 | -0.56 |
| ILMN_1670490 | PDPN      | 1.31E-03 | -0.42 |
| ILMN_1687533 | SEMA4D    | 1.33E-03 | -0.42 |
| ILMN_1691264 | NAT8B     | 1.34E-03 | -0.37 |
| ILMN_1809433 | XBP1      | 1.34E-03 | 0.55  |
| ILMN_1742547 | NRP1      | 1.34E-03 | -0.31 |
| ILMN_1746819 | C5        | 1.34E-03 | -0.41 |



|              |           |          |       |
|--------------|-----------|----------|-------|
| ILMN_1667068 | ZC3HAV1   | 1.34E-03 | -0.44 |
| ILMN_1838885 | KIAA1632  | 1.35E-03 | 0.24  |
| ILMN_1802380 | RERE      | 1.36E-03 | -0.35 |
| ILMN_2338452 | SERPINA1  | 1.37E-03 | -0.51 |
| ILMN_1749287 | TLR6      | 1.37E-03 | -0.22 |
| ILMN_1667429 | SLC25A20  | 1.38E-03 | -0.36 |
| ILMN_1674250 | NCKAP1L   | 1.38E-03 | -0.45 |
| ILMN_3277905 | LOC645313 | 1.39E-03 | 0.26  |
| ILMN_3245458 | SNORA61   | 1.40E-03 | 0.53  |
| ILMN_1767349 | ABCB4     | 1.40E-03 | -0.20 |
| ILMN_1776936 | ANKRD38   | 1.40E-03 | 0.63  |
| ILMN_1775170 | MT1X      | 1.41E-03 | -0.56 |
| ILMN_2174574 | HNRNPA3P1 | 1.42E-03 | -0.33 |
| ILMN_1726327 | AMY1B     | 1.42E-03 | -0.32 |
| ILMN_1760027 | WAS       | 1.42E-03 | -0.49 |
| ILMN_2305225 | NDRG4     | 1.43E-03 | 0.53  |
| ILMN_2132599 | ANKRD22   | 1.43E-03 | -0.35 |
| ILMN_2399304 | NAV2      | 1.45E-03 | 0.21  |
| ILMN_1795158 | FGR       | 1.46E-03 | 0.51  |
| ILMN_1768553 | LOC283050 | 1.46E-03 | 0.64  |
| ILMN_2115340 | HIST2H4A  | 1.46E-03 | -0.41 |
| ILMN_2324056 | GNL3      | 1.47E-03 | 0.36  |
| ILMN_1786426 | TMEM149   | 1.47E-03 | -0.52 |
| ILMN_1815319 | CMTM4     | 1.47E-03 | -0.27 |
| ILMN_2393296 | GK        | 1.47E-03 | 0.49  |
| ILMN_1687301 | VCAN      | 1.48E-03 | -0.25 |
| ILMN_1684306 | S100A4    | 1.49E-03 | -0.42 |
| ILMN_1795865 | FGFRL1    | 1.50E-03 | 0.23  |
| ILMN_1719139 | LOC643424 | 1.50E-03 | -0.26 |
| ILMN_1702534 | CD244     | 1.52E-03 | -0.17 |
| ILMN_2078592 | C6orf105  | 1.52E-03 | 0.29  |
| ILMN_1699767 | PDE8A     | 1.52E-03 | 0.24  |
| ILMN_1797531 | PRKAG2    | 1.52E-03 | 0.52  |
| ILMN_1815552 | NTAN1     | 1.53E-03 | 0.51  |
| ILMN_2152257 | SSTR2     | 1.53E-03 | 0.37  |
| ILMN_1755411 | RBMS2     | 1.53E-03 | -0.33 |
| ILMN_2111187 | ELOVL6    | 1.53E-03 | 0.41  |
| ILMN_1776602 | RNASE4    | 1.53E-03 | -0.48 |
| ILMN_1779547 | HPSE      | 1.58E-03 | -0.40 |
| ILMN_1701114 | GBP1      | 1.58E-03 | -0.66 |
| ILMN_1735156 | SLC4A11   | 1.58E-03 | 0.22  |
| ILMN_2178587 | ANKRD6    | 1.59E-03 | 0.36  |
| ILMN_2361603 | NDRG2     | 1.59E-03 | -0.56 |
| ILMN_1716859 | TDO2      | 1.60E-03 | -0.30 |
| ILMN_2220184 | GFPT1     | 1.62E-03 | 0.34  |
| ILMN_2041293 | SQLE      | 1.62E-03 | 0.79  |

|              |           |          |       |
|--------------|-----------|----------|-------|
| ILMN_1721136 | H6PD      | 1.62E-03 | -0.33 |
| ILMN_2246661 | FAHD1     | 1.62E-03 | 0.36  |
| ILMN_1681503 | MCM2      | 1.62E-03 | 0.23  |
| ILMN_1709772 | SNX5      | 1.63E-03 | -0.38 |
| ILMN_1882512 |           | 1.64E-03 | 0.34  |
| ILMN_2094942 | 42064     | 1.65E-03 | -0.61 |
| ILMN_1757387 | UCHL1     | 1.65E-03 | 0.62  |
| ILMN_1765578 | TIPARP    | 1.66E-03 | 0.43  |
| ILMN_1794011 | CHST2     | 1.66E-03 | -0.31 |
| ILMN_1736863 | TMEM140   | 1.67E-03 | 0.47  |
| ILMN_1709870 | HES2      | 1.67E-03 | 0.45  |
| ILMN_2324672 | USF2      | 1.67E-03 | 0.46  |
| ILMN_1723004 | CD72      | 1.67E-03 | -0.40 |
| ILMN_1811957 | CAMSAP1   | 1.67E-03 | 0.36  |
| ILMN_3226012 | LOC728698 | 1.69E-03 | 0.53  |
| ILMN_1731433 | ABP1      | 1.69E-03 | -0.59 |
| ILMN_1796490 | GRINA     | 1.70E-03 | 0.46  |
| ILMN_2335704 | NCF4      | 1.71E-03 | -0.45 |
| ILMN_1657435 | MT1M      | 1.71E-03 | -0.47 |
| ILMN_1775759 | NRAS      | 1.75E-03 | 0.37  |
| ILMN_2320888 | CXCR4     | 1.75E-03 | 0.55  |
| ILMN_1731745 | NINJ2     | 1.75E-03 | -0.50 |
| ILMN_1715416 | NUP188    | 1.75E-03 | 0.26  |
| ILMN_2106725 | NCF1B     | 1.75E-03 | -0.32 |
| ILMN_1802100 | ADAM28    | 1.75E-03 | -0.26 |
| ILMN_1661264 | SHMT2     | 1.75E-03 | 0.44  |
| ILMN_1670134 | FADS1     | 1.75E-03 | 0.46  |
| ILMN_1793730 | TM7SF4    | 1.75E-03 | 0.57  |
| ILMN_1723268 | FAIM      | 1.76E-03 | 0.29  |
| ILMN_2309180 | SMARCD3   | 1.78E-03 | 0.34  |
| ILMN_1705984 | HNMT      | 1.78E-03 | -0.33 |
| ILMN_2341611 | CDCP1     | 1.78E-03 | -0.29 |
| ILMN_2404154 | SERPINA1  | 1.79E-03 | -0.50 |
| ILMN_2277676 | ERCC1     | 1.81E-03 | -0.46 |
| ILMN_1686706 | SIGLEC7   | 1.81E-03 | -0.21 |
| ILMN_2358069 | MAD1L1    | 1.82E-03 | 0.35  |
| ILMN_1854833 |           | 1.82E-03 | -0.26 |
| ILMN_2328666 | CD83      | 1.82E-03 | 0.50  |
| ILMN_1655930 | ELL2      | 1.83E-03 | -0.40 |
| ILMN_1687757 | AKR1C4    | 1.83E-03 | 0.37  |
| ILMN_1656378 | NMT2      | 1.83E-03 | 0.40  |
| ILMN_2337740 | TULP4     | 1.84E-03 | 0.38  |
| ILMN_3247023 | FLJ22536  | 1.84E-03 | -0.50 |
| ILMN_1685781 | C14orf142 | 1.85E-03 | 0.38  |
| ILMN_2357419 | LILRA5    | 1.86E-03 | -0.37 |
| ILMN_1745079 | TRIM2     | 1.87E-03 | 0.21  |

|              |              |          |       |
|--------------|--------------|----------|-------|
| ILMN_1795236 | SIGLEC9      | 1.87E-03 | -0.30 |
| ILMN_2398107 | ASNS         | 1.88E-03 | 0.40  |
| ILMN_1803997 | SDCCAG3      | 1.88E-03 | 0.34  |
| ILMN_1814305 | SAMD9        | 1.89E-03 | -0.39 |
| ILMN_1687315 | RXRA         | 1.89E-03 | -0.40 |
| ILMN_2390310 | C17orf91     | 1.89E-03 | 0.33  |
| ILMN_1784300 | TUBA4A       | 1.89E-03 | -0.44 |
| ILMN_1805098 | PDE1B        | 1.90E-03 | -0.19 |
| ILMN_2219683 | NEU4         | 1.91E-03 | 0.18  |
| ILMN_1658407 | SLC43A3      | 1.91E-03 | 0.42  |
| ILMN_1674394 | C20orf3      | 1.91E-03 | -0.47 |
| ILMN_1733579 | EVI2A        | 1.91E-03 | -0.43 |
| ILMN_1728512 | YWHAH        | 1.91E-03 | -0.56 |
| ILMN_1681601 | SUCNR1       | 1.92E-03 | 0.64  |
| ILMN_1806106 | GNL3         | 1.92E-03 | 0.34  |
| ILMN_1695711 | FAM105A      | 1.92E-03 | -0.41 |
| ILMN_3242586 | RHOU         | 1.93E-03 | -0.47 |
| ILMN_2154052 | FVT1         | 1.93E-03 | 0.46  |
| ILMN_3238814 | LOC100170939 | 1.94E-03 | -0.25 |
| ILMN_1778161 | DNAJC25      | 1.94E-03 | 0.32  |
| ILMN_1724863 | TICAM1       | 1.95E-03 | 0.38  |
| ILMN_1742089 | NLN          | 1.95E-03 | 0.37  |
| ILMN_2396991 | HCST         | 1.97E-03 | -0.50 |
| ILMN_1809850 | RCN3         | 1.98E-03 | -0.22 |
| ILMN_1673548 | HSPC159      | 1.98E-03 | 0.46  |
| ILMN_3235704 | GGT3         | 1.98E-03 | -0.40 |
| ILMN_2157441 | HLA-DRA      | 1.98E-03 | -0.51 |
| ILMN_1781983 | AP1B1        | 1.98E-03 | -0.50 |
| ILMN_1654389 | LOC728744    | 2.00E-03 | -0.31 |
| ILMN_1726545 | LILRA5       | 2.00E-03 | -0.25 |
| ILMN_2063925 | CTNBL1       | 2.01E-03 | 0.46  |
| ILMN_1706344 | ABHD6        | 2.02E-03 | 0.40  |
| ILMN_2263718 | SPAG9        | 2.03E-03 | 0.39  |
| ILMN_1651950 | TPST1        | 2.05E-03 | 0.39  |
| ILMN_1763127 | CCBP2        | 2.06E-03 | -0.16 |
| ILMN_1715273 | PICALM       | 2.06E-03 | -0.55 |
| ILMN_2179726 | C16orf93     | 2.06E-03 | -0.34 |
| ILMN_3249477 | CHIT1        | 2.06E-03 | 0.39  |
| ILMN_1765204 | ST13         | 2.08E-03 | 0.37  |
| ILMN_1900520 |              | 2.09E-03 | -0.20 |
| ILMN_1765446 | EMP3         | 2.09E-03 | 0.56  |
| ILMN_1768595 | DLG4         | 2.10E-03 | -0.32 |
| ILMN_1779147 | ENC1         | 2.11E-03 | -0.53 |
| ILMN_1651705 | CAT          | 2.12E-03 | -0.58 |
| ILMN_1728435 | C12orf45     | 2.13E-03 | 0.40  |
| ILMN_2165473 | MID1IP1      | 2.13E-03 | 0.43  |

|              |           |          |       |
|--------------|-----------|----------|-------|
| ILMN_1810559 | RHOQ      | 2.13E-03 | 0.43  |
| ILMN_2370208 | CMTM3     | 2.14E-03 | -0.32 |
| ILMN_1655935 | ADCY7     | 2.14E-03 | -0.42 |
| ILMN_2211003 | GAS2L3    | 2.14E-03 | 0.30  |
| ILMN_1693334 | P4HA1     | 2.18E-03 | -0.42 |
| ILMN_1684770 | USF2      | 2.19E-03 | 0.18  |
| ILMN_2091920 | PTCRA     | 2.19E-03 | -0.38 |
| ILMN_1694305 | SMS       | 2.19E-03 | 0.44  |
| ILMN_1699520 | SLC8A1    | 2.19E-03 | -0.16 |
| ILMN_2357438 | AURKA     | 2.21E-03 | -0.29 |
| ILMN_1703969 | KIAA0251  | 2.21E-03 | 0.39  |
| ILMN_1741200 | RFX5      | 2.22E-03 | -0.43 |
| ILMN_1778064 | FICD      | 2.23E-03 | 0.43  |
| ILMN_2374244 | DYRK2     | 2.24E-03 | 0.49  |
| ILMN_1760620 | TMEM33    | 2.25E-03 | 0.41  |
| ILMN_1733390 | LARP1B    | 2.27E-03 | 0.32  |
| ILMN_1725471 | GK        | 2.27E-03 | 0.46  |
| ILMN_1791232 | SPRED2    | 2.29E-03 | -0.30 |
| ILMN_1805842 | FHL1      | 2.29E-03 | -0.27 |
| ILMN_1680314 | TXN       | 2.29E-03 | 0.34  |
| ILMN_1660880 | RNH1      | 2.30E-03 | 0.47  |
| ILMN_1749071 | CNIH3     | 2.30E-03 | 0.39  |
| ILMN_2275502 | RAPH1     | 2.31E-03 | -0.19 |
| ILMN_1655702 | ABHD5     | 2.32E-03 | 0.41  |
| ILMN_1671731 | AVPI1     | 2.33E-03 | 0.37  |
| ILMN_1682996 | VWA5A     | 2.33E-03 | 0.43  |
| ILMN_1699750 | ABHD9     | 2.36E-03 | -0.20 |
| ILMN_1776109 | ZNF622    | 2.37E-03 | 0.42  |
| ILMN_1773388 | C13orf18  | 2.37E-03 | -0.26 |
| ILMN_3294322 | LOC441009 | 2.37E-03 | -0.33 |
| ILMN_1732296 | ID3       | 2.38E-03 | -0.58 |
| ILMN_1798372 | ANXA2P3   | 2.39E-03 | 0.32  |
| ILMN_1746704 | TRIM8     | 2.39E-03 | -0.40 |
| ILMN_1652677 | FAM89A    | 2.40E-03 | 0.29  |
| ILMN_2098446 | PMAIP1    | 2.40E-03 | -0.40 |
| ILMN_2203729 | HCG4      | 2.40E-03 | 0.32  |
| ILMN_1725666 | GTF2H3    | 2.40E-03 | 0.31  |
| ILMN_1787680 | SELS      | 2.40E-03 | 0.45  |
| ILMN_1674698 | AARS2     | 2.41E-03 | -0.31 |
| ILMN_1713638 | NIPAL4    | 2.41E-03 | 0.73  |
| ILMN_1809931 | NDRG1     | 2.43E-03 | 0.46  |
| ILMN_1680591 | RTKN      | 2.43E-03 | 0.32  |
| ILMN_1815500 | ITPR3     | 2.45E-03 | 0.38  |
| ILMN_1704730 | CD93      | 2.45E-03 | -0.60 |
| ILMN_2231928 | MX2       | 2.45E-03 | -0.40 |
| ILMN_1786429 | P2RY5     | 2.46E-03 | -0.54 |

|              |           |          |       |
|--------------|-----------|----------|-------|
| ILMN_1792075 | CD22      | 2.46E-03 | 0.18  |
| ILMN_1788778 | 42258     | 2.46E-03 | 0.40  |
| ILMN_1677607 | SC5DL     | 2.46E-03 | 0.49  |
| ILMN_1773363 | CIITA     | 2.46E-03 | -0.32 |
| ILMN_1788547 | GCLM      | 2.48E-03 | 0.61  |
| ILMN_1799848 | ANKRD22   | 2.49E-03 | -0.37 |
| ILMN_1711223 | LOC649362 | 2.51E-03 | -0.63 |
| ILMN_1766896 | ZDHHC19   | 2.52E-03 | 0.45  |
| ILMN_3202568 | LOC643768 | 2.52E-03 | 0.21  |
| ILMN_1751868 | TCTEX1D1  | 2.54E-03 | -0.34 |
| ILMN_1751898 | C12orf4   | 2.56E-03 | 0.33  |
| ILMN_1730347 | CCDC115   | 2.57E-03 | 0.52  |
| ILMN_2050255 | UCKL1     | 2.58E-03 | 0.29  |
| ILMN_2412139 | CABYR     | 2.58E-03 | -0.22 |
| ILMN_1674983 | LOC387841 | 2.59E-03 | -0.33 |
| ILMN_1692163 | NSDHL     | 2.59E-03 | 0.42  |
| ILMN_2115005 | FGD2      | 2.61E-03 | -0.61 |
| ILMN_1687751 | BAALC     | 2.61E-03 | 0.23  |
| ILMN_1754660 | ZCCHC24   | 2.62E-03 | -0.30 |
| ILMN_1752562 | CXCL5     | 2.62E-03 | -0.55 |
| ILMN_2055477 | EXOSC7    | 2.62E-03 | 0.37  |
| ILMN_1687612 | PPARG     | 2.62E-03 | 0.31  |
| ILMN_1764861 | ISOC1     | 2.62E-03 | 0.36  |
| ILMN_3241378 | LOC728448 | 2.64E-03 | 0.27  |
| ILMN_3243190 | EMR4P     | 2.64E-03 | -0.28 |
| ILMN_1701514 | TRAF3IP2  | 2.65E-03 | -0.43 |
| ILMN_1680104 | SLC35C1   | 2.69E-03 | 0.28  |
| ILMN_2342638 | ASGR2     | 2.71E-03 | -0.13 |
| ILMN_1716596 | NSMAF     | 2.71E-03 | 0.37  |
| ILMN_2358919 | TP53I3    | 2.71E-03 | -0.38 |
| ILMN_2376205 | LTB       | 2.71E-03 | -0.26 |
| ILMN_1654630 | FAM193B   | 2.77E-03 | -0.30 |
| ILMN_1743199 | EGR2      | 2.78E-03 | 0.59  |
| ILMN_1906423 |           | 2.78E-03 | -0.32 |
| ILMN_1652638 | LRRRC58   | 2.78E-03 | 0.30  |
| ILMN_1793729 | C15orf39  | 2.78E-03 | -0.23 |
| ILMN_1695829 | TTYH2     | 2.79E-03 | 0.40  |
| ILMN_1799106 | MOSC1     | 2.80E-03 | -0.36 |
| ILMN_2415529 | CDK5RAP2  | 2.81E-03 | 0.36  |
| ILMN_1805903 | DOK2      | 2.81E-03 | -0.14 |
| ILMN_1716815 | CEACAM1   | 2.81E-03 | -0.26 |
| ILMN_1699665 | CLIC6     | 2.81E-03 | 0.34  |
| ILMN_1807719 | CTNS      | 2.82E-03 | 0.44  |
| ILMN_1798654 | MCM6      | 2.83E-03 | 0.38  |
| ILMN_1815895 | LOC649143 | 2.83E-03 | -0.55 |
| ILMN_1739428 | IFIT2     | 2.83E-03 | -0.43 |

|              |           |          |       |
|--------------|-----------|----------|-------|
| ILMN_1797425 | DDX55     | 2.84E-03 | 0.38  |
| ILMN_1694780 | GCHFR     | 2.85E-03 | 0.48  |
| ILMN_1767365 | PAK1      | 2.86E-03 | -0.42 |
| ILMN_2357809 | G3BP1     | 2.86E-03 | 0.31  |
| ILMN_1776723 | PHF11     | 2.87E-03 | -0.38 |
| ILMN_1707748 | PIM3      | 2.88E-03 | 0.39  |
| ILMN_1684289 | PNPO      | 2.89E-03 | -0.45 |
| ILMN_1672128 | ATF4      | 2.92E-03 | 0.36  |
| ILMN_2053921 | CAPZB     | 2.95E-03 | -0.40 |
| ILMN_1691860 | SPRY1     | 2.95E-03 | 0.42  |
| ILMN_2189859 | FLJ38482  | 3.01E-03 | 0.40  |
| ILMN_1696591 | RB1       | 3.03E-03 | -0.44 |
| ILMN_1771003 | HAUS4     | 3.03E-03 | -0.41 |
| ILMN_1654518 | LRCH4     | 3.05E-03 | -0.40 |
| ILMN_1705302 | FCGRT     | 3.05E-03 | -0.49 |
| ILMN_2188862 | GDF15     | 3.05E-03 | 0.75  |
| ILMN_1697652 | PLEKHB2   | 3.05E-03 | 0.47  |
| ILMN_1737406 | KLF6      | 3.05E-03 | 0.64  |
| ILMN_1706523 | FCGR2A    | 3.05E-03 | -0.42 |
| ILMN_1709486 | SRPX      | 3.05E-03 | 0.27  |
| ILMN_1711702 | CLEC2D    | 3.05E-03 | 0.37  |
| ILMN_1670535 | NDRG2     | 3.05E-03 | -0.34 |
| ILMN_1788024 | PCID2     | 3.05E-03 | 0.49  |
| ILMN_1675191 | GAPT      | 3.06E-03 | -0.80 |
| ILMN_3235832 | LOC728835 | 3.10E-03 | -0.40 |
| ILMN_1756355 | NDUFS3    | 3.10E-03 | 0.42  |
| ILMN_1775268 | HECW2     | 3.11E-03 | -0.11 |
| ILMN_1689327 | LOC730534 | 3.12E-03 | -0.37 |
| ILMN_1707310 | MGLL      | 3.12E-03 | 0.17  |
| ILMN_1760718 | ZMIZ2     | 3.12E-03 | 0.30  |
| ILMN_3233179 | LOC728969 | 3.14E-03 | 0.44  |
| ILMN_2043809 | PFKM      | 3.15E-03 | 0.45  |
| ILMN_1674593 | SIGLEC11  | 3.15E-03 | -0.22 |
| ILMN_1794782 | ABCG1     | 3.15E-03 | -0.58 |
| ILMN_2109343 | SGTB      | 3.15E-03 | 0.28  |
| ILMN_2089616 | FBXO10    | 3.15E-03 | 0.27  |
| ILMN_1796417 | ASNS      | 3.15E-03 | 0.38  |
| ILMN_2072101 | C4orf49   | 3.19E-03 | -0.14 |
| ILMN_1659075 | HLA-DOA   | 3.19E-03 | -0.17 |
| ILMN_2072296 | CKS2      | 3.20E-03 | 0.38  |
| ILMN_1842850 |           | 3.23E-03 | 0.34  |
| ILMN_1801939 | CCNB2     | 3.23E-03 | -0.21 |
| ILMN_1704753 | EPAS1     | 3.24E-03 | 0.40  |
| ILMN_3249435 | UBASH3B   | 3.24E-03 | -0.23 |
| ILMN_1671891 | PID1      | 3.24E-03 | -0.18 |
| ILMN_1719906 | HADH      | 3.24E-03 | -0.44 |

|              |           |          |       |
|--------------|-----------|----------|-------|
| ILMN_1758281 | CALCRL    | 3.25E-03 | -0.18 |
| ILMN_2318643 | TGIF1     | 3.26E-03 | 0.41  |
| ILMN_1890614 |           | 3.27E-03 | -0.31 |
| ILMN_2318685 | ABHD12    | 3.29E-03 | 0.41  |
| ILMN_2403237 | CHN2      | 3.30E-03 | -0.43 |
| ILMN_1684054 | ASAH1     | 3.30E-03 | 0.51  |
| ILMN_1668910 | CIDEB     | 3.30E-03 | -0.17 |
| ILMN_1765146 | IFNAR2    | 3.33E-03 | -0.36 |
| ILMN_1798249 | AK3L1     | 3.35E-03 | 0.37  |
| ILMN_2332964 | LGMN      | 3.35E-03 | 0.48  |
| ILMN_1653738 | INTS4     | 3.35E-03 | 0.18  |
| ILMN_1667306 | RANBP10   | 3.35E-03 | 0.31  |
| ILMN_1700047 | ALAS1     | 3.36E-03 | 0.19  |
| ILMN_1714167 | CYB5A     | 3.36E-03 | 0.43  |
| ILMN_2181892 | BEX2      | 3.37E-03 | 0.45  |
| ILMN_1764383 | MCOLN1    | 3.37E-03 | 0.34  |
| ILMN_2376455 | CSF2RA    | 3.38E-03 | -0.38 |
| ILMN_2092664 | ADSS      | 3.38E-03 | 0.39  |
| ILMN_1750008 | SUPV3L1   | 3.39E-03 | 0.53  |
| ILMN_1715131 | CCR7      | 3.39E-03 | 0.67  |
| ILMN_1655821 | CAPG      | 3.42E-03 | 0.41  |
| ILMN_1776052 | LOC148915 | 3.43E-03 | -0.40 |
| ILMN_2378952 | GPX4      | 3.46E-03 | 0.42  |
| ILMN_1783149 | CDH23     | 3.47E-03 | 0.16  |
| ILMN_1655011 | SERF1B    | 3.48E-03 | 0.32  |
| ILMN_1801043 | GSN       | 3.50E-03 | -0.51 |
| ILMN_3251467 | LRRRC58   | 3.51E-03 | 0.34  |
| ILMN_1653708 | CORO1B    | 3.55E-03 | -0.42 |
| ILMN_1705686 | NRGN      | 3.55E-03 | -0.28 |
| ILMN_1682572 | KIAA0528  | 3.57E-03 | -0.35 |
| ILMN_1651610 | LOC730525 | 3.57E-03 | 0.38  |
| ILMN_1761797 | CSTB      | 3.57E-03 | 0.31  |
| ILMN_1658494 | C13orf15  | 3.60E-03 | 0.41  |
| ILMN_1782741 | CD300LB   | 3.62E-03 | -0.16 |
| ILMN_2167426 | ASPHD2    | 3.62E-03 | -0.20 |
| ILMN_1691339 | CLEC1A    | 3.62E-03 | -0.17 |
| ILMN_1679929 | KLF13     | 3.63E-03 | -0.38 |
| ILMN_1807423 | IGF2BP3   | 3.63E-03 | 0.31  |
| ILMN_1668743 | LOC728069 | 3.63E-03 | 0.42  |
| ILMN_1711899 | ANXA2     | 3.65E-03 | 0.52  |
| ILMN_1717934 | SYT11     | 3.65E-03 | -0.52 |
| ILMN_2396444 | CD14      | 3.66E-03 | -0.42 |
| ILMN_3199780 | LOC401076 | 3.67E-03 | -0.39 |
| ILMN_2241187 | CRYM      | 3.67E-03 | 0.40  |
| ILMN_2235137 | FANCD2    | 3.67E-03 | -0.22 |
| ILMN_1802780 | M160      | 3.67E-03 | -0.23 |

|              |           |          |       |
|--------------|-----------|----------|-------|
| ILMN_1763144 | NEU1      | 3.67E-03 | 0.41  |
| ILMN_2052891 | PKD2      | 3.69E-03 | 0.39  |
| ILMN_1683774 | IL2RA     | 3.69E-03 | -0.27 |
| ILMN_3198367 | LOC646347 | 3.70E-03 | 0.47  |
| ILMN_1787115 | VWTR1     | 3.70E-03 | 0.19  |
| ILMN_2044572 | TBC1D20   | 3.70E-03 | 0.27  |
| ILMN_1747577 | ALAD      | 3.71E-03 | -0.32 |
| ILMN_1716507 | EPB41L1   | 3.72E-03 | 0.29  |
| ILMN_1808196 | GSTO1     | 3.73E-03 | 0.34  |
| ILMN_2052335 | MYOC      | 3.74E-03 | 0.45  |
| ILMN_1762712 | HHEX      | 3.74E-03 | -0.36 |
| ILMN_2103362 | ARHGAP27  | 3.76E-03 | -0.18 |
| ILMN_1803256 | STOX2     | 3.76E-03 | 0.36  |
| ILMN_1696946 | LOC654174 | 3.76E-03 | 0.40  |
| ILMN_1678490 | RILPL2    | 3.79E-03 | 0.56  |
| ILMN_1719627 | SLC27A3   | 3.80E-03 | -0.44 |
| ILMN_2380418 | BICD2     | 3.80E-03 | -0.39 |
| ILMN_2398274 | PYCARD    | 3.80E-03 | -0.35 |
| ILMN_2366212 | CD79B     | 3.80E-03 | -0.33 |
| ILMN_1807873 | SNX6      | 3.81E-03 | -0.39 |
| ILMN_1674285 | LOC401233 | 3.83E-03 | -0.39 |
| ILMN_2320349 | BACE1     | 3.83E-03 | -0.26 |
| ILMN_1691127 | VTN       | 3.84E-03 | -0.19 |
| ILMN_1725130 | FAM50A    | 3.85E-03 | 0.50  |
| ILMN_1810100 | PBX3      | 3.85E-03 | 0.40  |
| ILMN_1811973 | PPARD     | 3.85E-03 | 0.10  |
| ILMN_1696933 | NLRP3     | 3.86E-03 | -0.17 |
| ILMN_1666546 | DUSP14    | 3.88E-03 | 0.40  |
| ILMN_1803941 | TBC1D15   | 3.89E-03 | 0.36  |
| ILMN_1779828 | EDEM1     | 3.95E-03 | -0.33 |
| ILMN_1754121 | CSK       | 3.96E-03 | -0.43 |
| ILMN_1689842 | SC4MOL    | 3.97E-03 | 0.94  |
| ILMN_1786273 | C1orf122  | 3.97E-03 | -0.42 |
| ILMN_1745217 | FLJ10081  | 3.97E-03 | 0.36  |
| ILMN_1656011 | RGS1      | 3.98E-03 | 0.84  |
| ILMN_1788844 | BCL7C     | 3.98E-03 | 0.27  |
| ILMN_1660462 | MCOLN2    | 4.02E-03 | 0.38  |
| ILMN_1780197 | TBC1D24   | 4.03E-03 | 0.21  |
| ILMN_2390162 | PHF11     | 4.03E-03 | -0.42 |
| ILMN_1763539 | IER3IP1   | 4.03E-03 | 0.34  |
| ILMN_1792182 | RDH12     | 4.04E-03 | 0.12  |
| ILMN_1720083 | EHD4      | 4.07E-03 | -0.42 |
| ILMN_1700044 | SAP130    | 4.07E-03 | 0.28  |
| ILMN_2195236 | PGRMC2    | 4.07E-03 | 0.38  |
| ILMN_1716195 | HIST1H2BG | 4.09E-03 | -0.20 |
| ILMN_1784320 | ELMO1     | 4.09E-03 | -0.44 |



|              |           |          |       |
|--------------|-----------|----------|-------|
| ILMN_1793615 | ME3       | 4.10E-03 | 0.16  |
| ILMN_2339294 | LILRB5    | 4.12E-03 | -0.42 |
| ILMN_1799467 | SAMD9L    | 4.12E-03 | -0.40 |
| ILMN_1734353 | GPX4      | 4.13E-03 | 0.39  |
| ILMN_2076463 | SLC15A4   | 4.15E-03 | 0.39  |
| ILMN_1660844 | INTS4     | 4.16E-03 | 0.33  |
| ILMN_1651776 | FHOD1     | 4.16E-03 | -0.29 |
| ILMN_1699695 | TNFRSF21  | 4.16E-03 | -0.55 |
| ILMN_2114568 | GBP5      | 4.16E-03 | -0.40 |
| ILMN_1671028 | THRAP3    | 4.19E-03 | 0.40  |
| ILMN_1730660 | GALIG     | 4.20E-03 | 0.44  |
| ILMN_2364384 | PPARG     | 4.22E-03 | 0.41  |
| ILMN_1717052 | STARD10   | 4.24E-03 | 0.31  |
| ILMN_3242271 | GAPT      | 4.26E-03 | -0.47 |
| ILMN_1659106 | PHLDA3    | 4.27E-03 | 0.32  |
| ILMN_1704916 | KU-MEL-3  | 4.31E-03 | 0.26  |
| ILMN_1684982 | PDK4      | 4.36E-03 | -0.54 |
| ILMN_1672834 | SSH2      | 4.37E-03 | -0.37 |
| ILMN_1790603 | ATPAF1    | 4.37E-03 | -0.37 |
| ILMN_1880280 |           | 4.44E-03 | -0.18 |
| ILMN_1787193 | CYP2S1    | 4.44E-03 | -0.20 |
| ILMN_1652163 | DVL2      | 4.45E-03 | 0.25  |
| ILMN_1728742 | C5orf4    | 4.46E-03 | -0.35 |
| ILMN_1807042 | MARCKS    | 4.46E-03 | -0.39 |
| ILMN_1782938 | SLC16A10  | 4.47E-03 | -0.41 |
| ILMN_1704842 | ARL4A     | 4.47E-03 | 0.16  |
| ILMN_1660364 | PSCD4     | 4.47E-03 | -0.51 |
| ILMN_1802082 | PRDM8     | 4.48E-03 | -0.17 |
| ILMN_1655990 | CDK5RAP2  | 4.49E-03 | 0.35  |
| ILMN_1677736 | TMEM104   | 4.49E-03 | 0.20  |
| ILMN_1758323 | ACPP      | 4.50E-03 | -0.22 |
| ILMN_1709043 | C9orf46   | 4.50E-03 | 0.35  |
| ILMN_1890253 |           | 4.51E-03 | 0.45  |
| ILMN_1680955 | AURKA     | 4.52E-03 | -0.28 |
| ILMN_1701441 | LPAR1     | 4.52E-03 | -0.32 |
| ILMN_1738971 | USP54     | 4.52E-03 | 0.13  |
| ILMN_1661695 | IRAK3     | 4.52E-03 | 0.34  |
| ILMN_2210129 | PRIM1     | 4.52E-03 | -0.22 |
| ILMN_1695485 | C9orf109  | 4.52E-03 | -0.30 |
| ILMN_1695792 | CUL4A     | 4.53E-03 | 0.36  |
| ILMN_1694177 | PCNA      | 4.54E-03 | -0.33 |
| ILMN_1748767 | LOC730740 | 4.55E-03 | -0.35 |
| ILMN_2369603 | CPEB1     | 4.55E-03 | 0.35  |
| ILMN_2109416 | NAPSB     | 4.56E-03 | -0.63 |
| ILMN_1750395 | MBD2      | 4.59E-03 | -0.30 |
| ILMN_1665331 | AMT       | 4.59E-03 | -0.35 |

|              |           |          |       |
|--------------|-----------|----------|-------|
| ILMN_3232894 | CNRIP1    | 4.64E-03 | -0.51 |
| ILMN_1863284 |           | 4.64E-03 | -0.26 |
| ILMN_1855278 |           | 4.64E-03 | 0.33  |
| ILMN_1768798 | SPAG9     | 4.65E-03 | 0.23  |
| ILMN_1784287 | TGFBR3    | 4.71E-03 | 0.19  |
| ILMN_1707717 | BAALC     | 4.71E-03 | 0.12  |
| ILMN_1814952 | FLCN      | 4.72E-03 | 0.18  |
| ILMN_2060115 | SORL1     | 4.73E-03 | -0.33 |
| ILMN_1720270 | CDR2      | 4.75E-03 | 0.35  |
| ILMN_2305544 | DBI       | 4.75E-03 | 0.39  |
| ILMN_1715809 | OGFRL1    | 4.83E-03 | 0.42  |
| ILMN_1799837 | LOC727848 | 4.86E-03 | -0.14 |
| ILMN_3236904 | LOC648740 | 4.86E-03 | -0.21 |
| ILMN_1661196 | CSF2RA    | 4.86E-03 | -0.35 |
| ILMN_1807662 | IGF2R     | 4.89E-03 | 0.39  |
| ILMN_1713058 | PSTPIP2   | 4.89E-03 | -0.46 |
| ILMN_1669424 | LOC646531 | 4.89E-03 | 0.50  |
| ILMN_1763447 | PLXNB2    | 4.89E-03 | -0.53 |
| ILMN_1714108 | TP53INP1  | 4.89E-03 | -0.32 |
| ILMN_1700413 | MAFF      | 4.89E-03 | 0.26  |
| ILMN_2335813 | GCH1      | 4.90E-03 | -0.16 |
| ILMN_1671451 | LOC654201 | 4.91E-03 | 0.29  |
| ILMN_2121389 | ACOT1     | 4.92E-03 | 0.33  |
| ILMN_1772131 | IL1R2     | 4.92E-03 | -0.54 |
| ILMN_1691334 | TXNDC3    | 4.94E-03 | -0.21 |
| ILMN_1712708 | TRIM47    | 4.95E-03 | 0.31  |
| ILMN_1721127 | HIST1H3D  | 4.95E-03 | -0.39 |
| ILMN_1773760 | PAICS     | 4.97E-03 | 0.29  |
| ILMN_1791006 | AHI1      | 4.97E-03 | 0.21  |
| ILMN_1737087 | WDR5      | 4.98E-03 | 0.16  |
| ILMN_2066060 | HLA-DRB6  | 4.98E-03 | -0.38 |
| ILMN_1737255 | C22orf36  | 4.98E-03 | 0.18  |
| ILMN_1692545 | LOC646849 | 5.03E-03 | 0.35  |
| ILMN_1800837 | CFDP1     | 5.04E-03 | 0.33  |
| ILMN_3193271 | IRG1      | 5.07E-03 | -0.16 |
| ILMN_1794594 | RASGRP2   | 5.07E-03 | -0.14 |
| ILMN_1715214 | PTPN7     | 5.09E-03 | -0.33 |
| ILMN_2207561 | C4orf16   | 5.09E-03 | 0.21  |
| ILMN_1758827 | RTN4IP1   | 5.09E-03 | -0.27 |
| ILMN_1680928 | DNM3      | 5.10E-03 | 0.26  |
| ILMN_1771949 | TAF4B     | 5.12E-03 | 0.14  |
| ILMN_1785646 | PMP22     | 5.13E-03 | -0.41 |
| ILMN_3194508 | ASAP2     | 5.13E-03 | 0.19  |
| ILMN_2330597 | PQLC2     | 5.14E-03 | 0.26  |
| ILMN_1699071 | C21orf7   | 5.14E-03 | -0.55 |
| ILMN_1752932 | MPZL2     | 5.14E-03 | -0.29 |

|              |                    |          |       |
|--------------|--------------------|----------|-------|
| ILMN_1805693 | GMIP               | 5.14E-03 | -0.32 |
| ILMN_3224926 | RBM47              | 5.14E-03 | 0.34  |
| ILMN_2349658 | TSPO               | 5.15E-03 | 0.31  |
| ILMN_1695423 | CD9                | 5.16E-03 | 0.45  |
| ILMN_1787718 | SLC27A1            | 5.18E-03 | 0.34  |
| ILMN_1717572 | PGA5               | 5.19E-03 | -0.12 |
| ILMN_1730685 | MRPL16             | 5.19E-03 | -0.34 |
| ILMN_1743301 | MSR1               | 5.19E-03 | -0.38 |
| ILMN_2379718 | RAB24              | 5.21E-03 | -0.31 |
| ILMN_1756326 | CKS2               | 5.21E-03 | 0.33  |
| ILMN_2264205 | ZBTB8A             | 5.23E-03 | 0.13  |
| ILMN_1677446 | TMEM189-<br>UBE2V1 | 5.24E-03 | 0.33  |
| ILMN_2048607 | ANKRD9             | 5.26E-03 | 0.35  |
| ILMN_2370872 | GRINA              | 5.26E-03 | 0.35  |
| ILMN_3212284 | LOC645693          | 5.26E-03 | -0.22 |
| ILMN_1664153 | SLC30A5            | 5.29E-03 | 0.46  |
| ILMN_2412172 | APOBEC3F           | 5.31E-03 | -0.24 |
| ILMN_1706959 | TIMM22             | 5.31E-03 | -0.37 |
| ILMN_2388975 | CERK               | 5.32E-03 | -0.38 |
| ILMN_1662896 | BRWD2              | 5.32E-03 | -0.41 |
| ILMN_1703244 | MAP1LC3B           | 5.32E-03 | 0.30  |
| ILMN_1682799 | STAMBPL1           | 5.32E-03 | -0.20 |
| ILMN_1683950 | SNX11              | 5.33E-03 | -0.43 |
| ILMN_1768110 | ZAK                | 5.34E-03 | 0.35  |
| ILMN_2157099 | CCNA1              | 5.35E-03 | 0.43  |
| ILMN_1674050 | COL8A2             | 5.36E-03 | 0.55  |
| ILMN_1772241 | SQLE               | 5.37E-03 | 0.49  |
| ILMN_1780618 | TMEM192            | 5.37E-03 | 0.27  |
| ILMN_1778836 | SFRS7              | 5.40E-03 | -0.46 |
| ILMN_1703411 | PARP3              | 5.40E-03 | 0.19  |
| ILMN_1688670 | CDCP1              | 5.40E-03 | -0.18 |
| ILMN_1806023 | JUN                | 5.40E-03 | 0.44  |
| ILMN_1735495 | TBC1D8             | 5.43E-03 | -0.35 |
| ILMN_1698752 | NLRX1              | 5.43E-03 | -0.17 |
| ILMN_2082209 | C20orf100          | 5.45E-03 | -0.49 |
| ILMN_1800164 | PPFIA1             | 5.46E-03 | 0.38  |
| ILMN_2229261 | SIGLEC16           | 5.49E-03 | -0.83 |
| ILMN_2094061 | IMPA2              | 5.51E-03 | -0.31 |
| ILMN_1761829 | HK1                | 5.52E-03 | -0.34 |
| ILMN_1807493 | ACVRL1             | 5.56E-03 | -0.19 |
| ILMN_2053103 | SLC40A1            | 5.57E-03 | -0.49 |
| ILMN_1762294 | ADAMTSL4           | 5.59E-03 | -0.23 |
| ILMN_1796336 | MAP1S              | 5.60E-03 | -0.26 |
| ILMN_1746171 | H2AFY              | 5.61E-03 | 0.42  |
| ILMN_1786388 | RNF113A            | 5.61E-03 | 0.39  |

|              |           |          |       |
|--------------|-----------|----------|-------|
| ILMN_1662640 | C2orf127  | 5.63E-03 | -0.45 |
| ILMN_2331087 | MS4A7     | 5.63E-03 | -0.39 |
| ILMN_1731181 | TEX2      | 5.65E-03 | 0.37  |
| ILMN_1735360 | SDAD1     | 5.65E-03 | 0.45  |
| ILMN_1796508 | TOP1MT    | 5.65E-03 | 0.36  |
| ILMN_1654696 | C15orf48  | 5.65E-03 | 0.47  |
| ILMN_1724495 | SESTD1    | 5.65E-03 | -0.32 |
| ILMN_1734855 | SELPLG    | 5.73E-03 | -0.15 |
| ILMN_1736796 | RB1CC1    | 5.74E-03 | 0.37  |
| ILMN_1735275 | WDSUB1    | 5.74E-03 | 0.43  |
| ILMN_1673305 | RHOC      | 5.77E-03 | -0.37 |
| ILMN_1723235 | DUS3L     | 5.77E-03 | 0.26  |
| ILMN_1702487 | SGK       | 5.77E-03 | 0.40  |
| ILMN_1685005 | TNFRSF1A  | 5.85E-03 | -0.36 |
| ILMN_2170813 | LAMP3     | 5.86E-03 | -0.54 |
| ILMN_1743456 | ZCCHC14   | 5.86E-03 | 0.24  |
| ILMN_1710906 | RNF145    | 5.89E-03 | 0.32  |
| ILMN_1756238 | TMEM217   | 5.89E-03 | 0.25  |
| ILMN_1742705 | SLC39A11  | 5.90E-03 | 0.34  |
| ILMN_1721623 | APOO      | 5.96E-03 | 0.39  |
| ILMN_2162989 | TMEM189   | 5.97E-03 | 0.45  |
| ILMN_1652065 | KCNMB1    | 5.98E-03 | -0.34 |
| ILMN_2048636 | ME2       | 5.99E-03 | -0.44 |
| ILMN_2182148 | C2orf32   | 5.99E-03 | -0.21 |
| ILMN_1720282 | NQO1      | 6.00E-03 | 0.43  |
| ILMN_2415329 | SULT1C2   | 6.00E-03 | 0.36  |
| ILMN_1777233 | E2F2      | 6.01E-03 | 0.34  |
| ILMN_1776850 | ITGB1BP3  | 6.02E-03 | 0.30  |
| ILMN_1733956 | IARS      | 6.03E-03 | 0.43  |
| ILMN_1809417 | LRFN4     | 6.04E-03 | 0.27  |
| ILMN_3242016 | POTEE     | 6.04E-03 | -0.16 |
| ILMN_2207562 | C4orf16   | 6.04E-03 | 0.22  |
| ILMN_1760062 | IFI44     | 6.08E-03 | -0.48 |
| ILMN_1664051 | SEC22C    | 6.08E-03 | 0.34  |
| ILMN_2232478 | APOBEC3G  | 6.10E-03 | -0.29 |
| ILMN_1781155 | LYN       | 6.10E-03 | -0.33 |
| ILMN_1796339 | PLEKHA2   | 6.10E-03 | 0.37  |
| ILMN_1727606 | C12orf59  | 6.18E-03 | -0.23 |
| ILMN_1803739 | RPGRIP1   | 6.19E-03 | -0.22 |
| ILMN_1797522 | DUSP3     | 6.19E-03 | 0.37  |
| ILMN_1721833 | IER5      | 6.20E-03 | -0.36 |
| ILMN_1726448 | MMP1      | 6.23E-03 | 0.30  |
| ILMN_1720113 | PTPRO     | 6.24E-03 | -0.36 |
| ILMN_1767377 | LOC153561 | 6.27E-03 | -0.29 |
| ILMN_1666122 | HEG1      | 6.27E-03 | 0.31  |
| ILMN_1723139 | GPD2      | 6.30E-03 | 0.25  |

|              |           |          |       |
|--------------|-----------|----------|-------|
| ILMN_1869109 |           | 6.30E-03 | -0.35 |
| ILMN_1755974 | ALDOC     | 6.30E-03 | 0.34  |
| ILMN_1760347 | SRGN      | 6.30E-03 | -0.41 |
| ILMN_3305938 | SGK1      | 6.30E-03 | 0.44  |
| ILMN_1770623 | FAM58A    | 6.36E-03 | 0.35  |
| ILMN_1696713 | POLA2     | 6.37E-03 | -0.29 |
| ILMN_2066066 | HLA-DRB6  | 6.44E-03 | -0.37 |
| ILMN_1662932 | LCP1      | 6.45E-03 | -0.31 |
| ILMN_1751753 | IDH2      | 6.45E-03 | -0.34 |
| ILMN_1740418 | CYP27B1   | 6.46E-03 | 0.80  |
| ILMN_1703074 | CPD       | 6.48E-03 | 0.46  |
| ILMN_1656285 | METTL7A   | 6.51E-03 | -0.40 |
| ILMN_1803745 | SUOX      | 6.51E-03 | -0.36 |
| ILMN_2124802 | MT1H      | 6.52E-03 | -0.31 |
| ILMN_2319913 | DGKA      | 6.53E-03 | -0.19 |
| ILMN_1713603 | PRKCB1    | 6.53E-03 | 0.28  |
| ILMN_1812384 | NR3C1     | 6.57E-03 | -0.21 |
| ILMN_1744968 | KCNAB1    | 6.57E-03 | 0.46  |
| ILMN_1682588 | LOC643461 | 6.57E-03 | 0.13  |
| ILMN_3202002 | LOC643332 | 6.57E-03 | -0.09 |
| ILMN_3284119 | LOC399804 | 6.57E-03 | 0.51  |
| ILMN_1693345 | CPEB1     | 6.57E-03 | 0.30  |
| ILMN_1673543 | PGM2      | 6.57E-03 | -0.29 |
| ILMN_1738675 | PTPN6     | 6.57E-03 | -0.38 |
| ILMN_1690125 | PDLIM7    | 6.61E-03 | -0.31 |
| ILMN_3238435 | SNORA12   | 6.61E-03 | 0.26  |
| ILMN_2086612 | CMAH      | 6.61E-03 | -0.17 |
| ILMN_2183216 | TTRAP     | 6.62E-03 | 0.32  |
| ILMN_1800898 | ARG2      | 6.63E-03 | -0.29 |
| ILMN_1815035 | DENND2C   | 6.64E-03 | 0.18  |
| ILMN_2148668 | RCBTB2    | 6.67E-03 | -0.32 |
| ILMN_1743367 | FZD4      | 6.67E-03 | 0.15  |
| ILMN_1773200 | CP110     | 6.68E-03 | -0.30 |
| ILMN_1667430 | DEGS1     | 6.69E-03 | -0.33 |
| ILMN_1744912 | CTTN      | 6.72E-03 | 0.32  |
| ILMN_1720004 | FLJ27354  | 6.78E-03 | -0.14 |
| ILMN_1784040 | NAPSA     | 6.78E-03 | -0.22 |
| ILMN_2124187 | TSC22D2   | 6.81E-03 | 0.32  |
| ILMN_1728048 | LOC158160 | 6.81E-03 | 0.36  |
| ILMN_1672356 | ANKRD13D  | 6.81E-03 | -0.22 |
| ILMN_2387090 | CGGBP1    | 6.82E-03 | 0.33  |
| ILMN_3206343 | LOC644914 | 6.82E-03 | -0.34 |
| ILMN_1665510 | ERRFI1    | 6.85E-03 | 0.20  |
| ILMN_1706217 | TLR4      | 6.85E-03 | -0.36 |
| ILMN_1857081 |           | 6.86E-03 | 0.18  |
| ILMN_1806651 | PARP8     | 6.86E-03 | -0.27 |

|              |           |          |       |
|--------------|-----------|----------|-------|
| ILMN_1742577 | GTPBP4    | 6.86E-03 | 0.37  |
| ILMN_2075927 | STK40     | 6.89E-03 | 0.37  |
| ILMN_1752159 | AHNAK     | 6.92E-03 | 0.27  |
| ILMN_2369018 | EVI2A     | 6.93E-03 | -0.43 |
| ILMN_2283325 | GPR177    | 6.95E-03 | -0.31 |
| ILMN_1721626 | ARID5B    | 6.96E-03 | -0.33 |
| ILMN_1762718 | CMTM4     | 6.96E-03 | -0.17 |
| ILMN_1798308 | AHSA2     | 6.96E-03 | -0.34 |
| ILMN_1664243 | USE1      | 7.01E-03 | 0.16  |
| ILMN_1759563 | NRIP3     | 7.03E-03 | 0.40  |
| ILMN_2081682 | SMAP2     | 7.05E-03 | -0.36 |
| ILMN_1798204 | IL21R     | 7.06E-03 | -0.42 |
| ILMN_1809292 | IMMP2L    | 7.08E-03 | 0.18  |
| ILMN_1694757 | CTSL1     | 7.09E-03 | 0.47  |
| ILMN_1741404 | MSC       | 7.09E-03 | 0.46  |
| ILMN_3289522 | LOC147646 | 7.10E-03 | -0.20 |
| ILMN_1782389 | LAD1      | 7.10E-03 | -0.24 |
| ILMN_2077623 | RRAS2     | 7.13E-03 | 0.18  |
| ILMN_3246065 | CCDC151   | 7.15E-03 | -0.27 |
| ILMN_1767662 | LASS6     | 7.16E-03 | -0.30 |
| ILMN_1708881 | RAB20     | 7.20E-03 | 0.31  |
| ILMN_1663646 | DMXL1     | 7.20E-03 | 0.30  |
| ILMN_1657679 | VAV3      | 7.20E-03 | -0.37 |
| ILMN_1768558 | LOC727848 | 7.21E-03 | -0.16 |
| ILMN_1727150 | DHRS9     | 7.23E-03 | -0.15 |
| ILMN_3243142 | KAT2B     | 7.23E-03 | -0.32 |
| ILMN_1675939 | IFNGR1    | 7.26E-03 | -0.35 |
| ILMN_1811470 | PLEK2     | 7.29E-03 | -0.23 |
| ILMN_1815707 | CALML4    | 7.29E-03 | -0.36 |
| ILMN_1736829 | MDM2      | 7.30E-03 | 0.24  |
| ILMN_1682761 | C17orf87  | 7.35E-03 | -0.29 |
| ILMN_1671337 | SLC2A5    | 7.38E-03 | 0.61  |
| ILMN_1748844 | CNKSR3    | 7.38E-03 | -0.19 |
| ILMN_1654118 | BCL2L1    | 7.39E-03 | 0.40  |
| ILMN_1711681 | SPATS1    | 7.39E-03 | 0.18  |
| ILMN_1675186 | ME2       | 7.40E-03 | -0.42 |
| ILMN_1657810 | PPM1M     | 7.42E-03 | -0.37 |
| ILMN_1770692 | WDR12     | 7.42E-03 | 0.35  |
| ILMN_1752526 | RNF144B   | 7.42E-03 | -0.30 |
| ILMN_1757415 | C1orf163  | 7.46E-03 | 0.24  |
| ILMN_1783806 | DTNBP1    | 7.51E-03 | 0.20  |
| ILMN_3210914 | LOC344887 | 7.51E-03 | 0.26  |
| ILMN_3251341 | TUBA1C    | 7.53E-03 | -0.33 |
| ILMN_1756982 | CLIC1     | 7.58E-03 | -0.34 |
| ILMN_1791511 | TMEM176A  | 7.60E-03 | -0.36 |
| ILMN_1656196 | E2F6      | 7.60E-03 | 0.34  |

|              |              |          |       |
|--------------|--------------|----------|-------|
| ILMN_1696347 | CTSC         | 7.60E-03 | -0.35 |
| ILMN_3251620 | JMY          | 7.61E-03 | 0.16  |
| ILMN_2400500 | LASS2        | 7.63E-03 | 0.30  |
| ILMN_1671237 | GNGT2        | 7.67E-03 | -0.27 |
| ILMN_1755954 | CPEB3        | 7.71E-03 | -0.31 |
| ILMN_1705737 | IMPDH2       | 7.74E-03 | 0.30  |
| ILMN_2292178 | CLEC12A      | 7.84E-03 | -0.47 |
| ILMN_1693620 | PGM3         | 7.87E-03 | 0.30  |
| ILMN_3281195 | LOC440459    | 7.87E-03 | 0.18  |
| ILMN_1655206 | ZBTB34       | 7.88E-03 | -0.26 |
| ILMN_1813374 | C19orf28     | 7.90E-03 | 0.30  |
| ILMN_1712639 | AIFM2        | 7.90E-03 | 0.21  |
| ILMN_3233930 | LOC390557    | 7.91E-03 | -0.38 |
| ILMN_1684873 | ARSD         | 7.92E-03 | -0.31 |
| ILMN_1729515 | PIN4         | 7.94E-03 | -0.19 |
| ILMN_1772359 | LAPTM5       | 7.94E-03 | -0.34 |
| ILMN_1755727 | KDM5B        | 7.96E-03 | 0.35  |
| ILMN_1659027 | SLC2A1       | 7.96E-03 | 0.45  |
| ILMN_2356284 | PFDN5        | 7.96E-03 | -0.31 |
| ILMN_1675803 | LOC285550    | 7.97E-03 | -0.23 |
| ILMN_1704164 | ATP13A2      | 8.00E-03 | 0.16  |
| ILMN_1755873 | EMR3         | 8.06E-03 | -0.19 |
| ILMN_3238233 | HIST2H4B     | 8.08E-03 | -0.29 |
| ILMN_2413599 | CALML4       | 8.08E-03 | -0.12 |
| ILMN_1679838 | WBP5         | 8.12E-03 | 0.35  |
| ILMN_1777982 | USF1         | 8.16E-03 | -0.37 |
| ILMN_1696546 | FZD1         | 8.19E-03 | -0.15 |
| ILMN_2119297 | SAMD4A       | 8.21E-03 | 0.30  |
| ILMN_1737025 | PLCL2        | 8.22E-03 | -0.35 |
| ILMN_3210491 | LOC389049    | 8.24E-03 | 0.26  |
| ILMN_3248511 | FAM167A      | 8.24E-03 | 0.17  |
| ILMN_2311989 | CUTA         | 8.24E-03 | 0.35  |
| ILMN_2387919 | PRKAG2       | 8.29E-03 | 0.32  |
| ILMN_3239217 | LOC729057    | 8.29E-03 | 0.20  |
| ILMN_3242540 | CD163L1      | 8.29E-03 | -0.12 |
| ILMN_1746408 | MIDN         | 8.30E-03 | -0.36 |
| ILMN_3247821 | TMEM206      | 8.34E-03 | 0.32  |
| ILMN_2224103 | PAPSS1       | 8.35E-03 | -0.30 |
| ILMN_1691156 | MT1A         | 8.37E-03 | -0.35 |
| ILMN_3246060 | LOC654433    | 8.37E-03 | 0.21  |
| ILMN_1697864 | CXorf38      | 8.43E-03 | -0.30 |
| ILMN_1754600 | FNBP1L       | 8.43E-03 | 0.27  |
| ILMN_2336781 | SOD2         | 8.43E-03 | 0.35  |
| ILMN_3191227 | LOC100129267 | 8.45E-03 | 0.20  |
| ILMN_1763852 | ACACB        | 8.45E-03 | -0.32 |
| ILMN_2312194 | CYB5A        | 8.48E-03 | 0.42  |

|              |              |          |       |
|--------------|--------------|----------|-------|
| ILMN_1768577 | PCSK6        | 8.50E-03 | 0.20  |
| ILMN_1741483 | HPS1         | 8.53E-03 | 0.21  |
| ILMN_1733603 | NDUFC1       | 8.56E-03 | -0.34 |
| ILMN_1678353 | FARP1        | 8.58E-03 | 0.29  |
| ILMN_1815626 | DHCR7        | 8.60E-03 | 0.37  |
| ILMN_1737964 | HIATL1       | 8.60E-03 | 0.38  |
| ILMN_1651767 | MKL1         | 8.62E-03 | -0.28 |
| ILMN_1688953 | ARHGAP19     | 8.63E-03 | -0.27 |
| ILMN_1717636 | RGMA         | 8.66E-03 | -0.18 |
| ILMN_1857335 |              | 8.69E-03 | -0.22 |
| ILMN_2364674 | TRPT1        | 8.70E-03 | -0.36 |
| ILMN_1741727 | QPCT         | 8.70E-03 | -0.33 |
| ILMN_2081883 | IQCK         | 8.73E-03 | 0.31  |
| ILMN_1678775 | CLEC2D       | 8.76E-03 | 0.29  |
| ILMN_2233878 | SERF1B       | 8.77E-03 | 0.18  |
| ILMN_1657550 | MVD          | 8.80E-03 | 0.24  |
| ILMN_1677133 | MITD1        | 8.81E-03 | 0.30  |
| ILMN_1771385 | GBP4         | 8.81E-03 | -0.30 |
| ILMN_1680925 | SLC9A3R1     | 8.83E-03 | 0.32  |
| ILMN_1771987 | SLC44A2      | 8.85E-03 | -0.32 |
| ILMN_3243156 | AHNAK2       | 8.85E-03 | 0.24  |
| ILMN_1688322 | ADIPOR1      | 8.85E-03 | 0.41  |
| ILMN_3179620 | LOC100129673 | 8.91E-03 | 0.25  |
| ILMN_1758672 | FAM107B      | 8.92E-03 | -0.35 |
| ILMN_1718766 | MT1F         | 8.92E-03 | -0.31 |
| ILMN_2290618 | SEC22C       | 8.92E-03 | 0.30  |
| ILMN_1807925 | GNG2         | 8.92E-03 | -0.19 |
| ILMN_3209232 | LOC644496    | 8.98E-03 | 0.18  |
| ILMN_1789732 | TMEM189      | 9.07E-03 | 0.22  |
| ILMN_3276822 | LOC645726    | 9.07E-03 | -0.12 |
| ILMN_1761281 | LOC441019    | 9.07E-03 | -0.31 |
| ILMN_1665736 | LOC648024    | 9.08E-03 | 0.52  |
| ILMN_1668960 | MID1IP1      | 9.11E-03 | 0.36  |
| ILMN_1777342 | PREX1        | 9.11E-03 | -0.28 |
| ILMN_2062620 | NMT2         | 9.16E-03 | 0.21  |
| ILMN_1793522 | PRKAB1       | 9.21E-03 | -0.24 |
| ILMN_1784948 | SPOCD1       | 9.22E-03 | -0.37 |
| ILMN_1723768 | NLRX1        | 9.23E-03 | -0.33 |
| ILMN_1796106 | MGAT4B       | 9.24E-03 | 0.25  |
| ILMN_1769634 | STRA13       | 9.25E-03 | 0.32  |
| ILMN_2204876 | FLVCR2       | 9.27E-03 | -0.33 |
| ILMN_1673586 | SLC6A6       | 9.31E-03 | 0.35  |
| ILMN_1801584 | CXCR4        | 9.31E-03 | 0.51  |
| ILMN_1734814 | HSPA4        | 9.31E-03 | 0.28  |
| ILMN_2382990 | HK1          | 9.31E-03 | -0.44 |
| ILMN_1704084 | CMAH         | 9.32E-03 | -0.27 |



|              |          |          |       |
|--------------|----------|----------|-------|
| ILMN_1805064 | SCARNA9  | 9.46E-03 | 0.35  |
| ILMN_1786328 | WDR40A   | 9.56E-03 | -0.32 |
| ILMN_1738632 | PRKAR1A  | 9.56E-03 | -0.32 |
| ILMN_2124585 | GREM1    | 9.63E-03 | 0.15  |
| ILMN_1761101 | CCDC112  | 9.64E-03 | -0.28 |
| ILMN_1658639 | SLC46A3  | 9.65E-03 | -0.34 |
| ILMN_2358457 | ATF4     | 9.65E-03 | 0.37  |
| ILMN_1796210 | PPRC1    | 9.65E-03 | 0.23  |
| ILMN_1652906 | GBGT1    | 9.68E-03 | -0.33 |
| ILMN_1789505 | ITPR1    | 9.71E-03 | 0.45  |
| ILMN_1805792 | TRIO     | 9.72E-03 | 0.25  |
| ILMN_2393497 | ATXN3    | 9.75E-03 | 0.29  |
| ILMN_1771139 | FBXO31   | 9.80E-03 | 0.27  |
| ILMN_2411658 | HPS1     | 9.83E-03 | 0.19  |
| ILMN_1796074 | C18orf56 | 9.86E-03 | -0.15 |
| ILMN_1792305 | ZNF318   | 9.86E-03 | 0.28  |
| ILMN_3307757 | C17orf87 | 9.93E-03 | -0.28 |
| ILMN_1695962 | SLC12A9  | 9.95E-03 | -0.39 |
| ILMN_1653042 | HSD3B7   | 9.96E-03 | 0.33  |
| ILMN_1718807 | SMC3     | 9.96E-03 | 0.28  |
| ILMN_2095759 | OGFRL1   | 9.97E-03 | 0.45  |

**Methylprednisolone (MP)**

| <b>ProbeID</b> | <b>Gene Symbol</b> | <b>FDR</b> | <b>Log<sub>2</sub>[MP/NoTx]</b> |
|----------------|--------------------|------------|---------------------------------|
| ILMN_1688580   | CAMP               | 0.00E+00   | 3.91                            |
| ILMN_1772131   | IL1R2              | 1.05E-11   | 3.94                            |
| ILMN_2376403   | TSC22D3            | 1.05E-11   | 2.87                            |
| ILMN_1748124   | TSC22D3            | 9.71E-11   | 2.67                            |
| ILMN_1778444   | FKBP5              | 3.23E-10   | 3.14                            |
| ILMN_1700896   | SAP30              | 6.07E-10   | 2.09                            |
| ILMN_1758457   | TBC1D16            | 6.07E-10   | 2.53                            |
| ILMN_2305407   | ZBTB16             | 6.07E-10   | 1.69                            |
| ILMN_1709486   | SRPX               | 8.42E-10   | 2.67                            |
| ILMN_1666733   | IL8                | 1.53E-09   | -2.43                           |
| ILMN_1656940   | ABLIM3             | 1.53E-09   | 1.33                            |
| ILMN_1775405   | ARL4A              | 1.53E-09   | 1.74                            |
| ILMN_1684982   | PDK4               | 1.53E-09   | 2.89                            |
| ILMN_2223941   | FBLN5              | 1.53E-09   | 2.53                            |
| ILMN_1707124   | TFPI               | 1.53E-09   | 2.01                            |
| ILMN_2393149   | ALOX15B            | 1.53E-09   | 2.33                            |
| ILMN_1719986   | PIK3IP1            | 1.53E-09   | 1.95                            |
| ILMN_2276952   | TSC22D3            | 1.74E-09   | 1.71                            |
| ILMN_2329914   | SPRY1              | 3.14E-09   | 2.43                            |
| ILMN_1738552   | SLC1A3             | 4.25E-09   | 1.52                            |

|              |           |          |       |
|--------------|-----------|----------|-------|
| ILMN_1751975 | ALOX15B   | 4.25E-09 | 1.91  |
| ILMN_1756071 | MFGE8     | 4.41E-09 | 3.77  |
| ILMN_2328666 | CD83      | 4.77E-09 | -1.50 |
| ILMN_1796409 | C1QB      | 4.77E-09 | 1.76  |
| ILMN_2184373 | IL8       | 4.84E-09 | -2.19 |
| ILMN_1671509 | CCL3      | 5.32E-09 | -2.47 |
| ILMN_1800626 | SESN1     | 5.32E-09 | 1.59  |
| ILMN_1747355 | CCL3L1    | 5.57E-09 | -2.13 |
| ILMN_1780582 | CD83      | 6.04E-09 | -1.47 |
| ILMN_2073289 | MTSS1     | 7.82E-09 | 1.95  |
| ILMN_1662619 | TFPI      | 7.82E-09 | 1.99  |
| ILMN_1770768 | SLAMF1    | 9.03E-09 | 1.75  |
| ILMN_1811933 | SHMT1     | 1.07E-08 | 1.60  |
| ILMN_1676980 | MTSS1     | 1.15E-08 | 1.40  |
| ILMN_2072178 | ECHDC3    | 1.40E-08 | 2.05  |
| ILMN_1736527 | TFCP2L1   | 1.64E-08 | 1.19  |
| ILMN_1691860 | SPRY1     | 1.69E-08 | 1.58  |
| ILMN_1664176 | FBLN5     | 1.69E-08 | 1.86  |
| ILMN_1656057 | PLAU      | 1.79E-08 | -1.20 |
| ILMN_1801303 | AMY2A     | 1.86E-08 | 1.16  |
| ILMN_1730710 | ADORA3    | 2.28E-08 | 2.30  |
| ILMN_1752668 | DAAM2     | 2.61E-08 | 1.41  |
| ILMN_1661695 | IRAK3     | 2.85E-08 | 1.59  |
| ILMN_1709484 | BLM       | 3.06E-08 | 0.94  |
| ILMN_1781285 | DUSP1     | 3.78E-08 | 1.93  |
| ILMN_1651610 | LOC730525 | 3.78E-08 | 1.94  |
| ILMN_1743199 | EGR2      | 3.94E-08 | -1.44 |
| ILMN_1856480 |           | 4.39E-08 | 1.15  |
| ILMN_1754865 | LOC400455 | 4.40E-08 | 1.34  |
| ILMN_2399363 | CLEC4A    | 4.67E-08 | -1.38 |
| ILMN_1661599 | DDIT4     | 5.08E-08 | 1.33  |
| ILMN_1651950 | TPST1     | 5.59E-08 | 1.44  |
| ILMN_2402817 | ZBTB16    | 5.70E-08 | 1.05  |
| ILMN_1785345 | GPR84     | 5.85E-08 | -1.23 |
| ILMN_1664170 | CUGBP2    | 6.02E-08 | 0.60  |
| ILMN_1740015 | CD14      | 8.14E-08 | -1.67 |
| ILMN_2105573 | CCL3L3    | 8.41E-08 | -2.28 |
| ILMN_1792455 | TMEM158   | 8.47E-08 | -1.31 |
| ILMN_1760727 | ANG       | 8.47E-08 | 1.12  |
| ILMN_1801313 | SIAH2     | 8.51E-08 | 1.14  |
| ILMN_2304512 | SAA1      | 8.51E-08 | 1.47  |
| ILMN_2157099 | CCNA1     | 9.98E-08 | 1.96  |
| ILMN_1781996 | NUDT16    | 9.98E-08 | 1.16  |
| ILMN_1779677 | ZCCHC6    | 1.02E-07 | 1.38  |
| ILMN_1654696 | C15orf48  | 1.02E-07 | -1.18 |
| ILMN_2234697 | BEX1      | 1.02E-07 | -2.57 |

|              |           |          |       |
|--------------|-----------|----------|-------|
| ILMN_2348487 | EMR3      | 1.09E-07 | -1.13 |
| ILMN_1776602 | RNASE4    | 1.15E-07 | 1.18  |
| ILMN_2367239 | RCAN1     | 1.42E-07 | 1.03  |
| ILMN_1733270 | CD163     | 1.47E-07 | 2.05  |
| ILMN_1758371 | IL1R2     | 1.47E-07 | 1.11  |
| ILMN_1707077 | SORT1     | 1.47E-07 | 1.37  |
| ILMN_1779648 | HIST3H2A  | 1.49E-07 | 1.01  |
| ILMN_1656011 | RGS1      | 1.52E-07 | 1.54  |
| ILMN_1720282 | NQO1      | 1.52E-07 | -1.28 |
| ILMN_2218856 | CCL3L1    | 1.52E-07 | -1.51 |
| ILMN_2137789 | KLF4      | 1.56E-07 | 0.75  |
| ILMN_2092118 | FPR1      | 1.62E-07 | 1.99  |
| ILMN_1742382 | RIMS3     | 1.62E-07 | 1.21  |
| ILMN_1742981 | TUBA1A    | 1.62E-07 | -1.38 |
| ILMN_1733956 | IARS      | 1.63E-07 | 1.79  |
| ILMN_1769299 | MTMR11    | 1.63E-07 | 1.72  |
| ILMN_1738578 | FILIP1L   | 1.64E-07 | 1.15  |
| ILMN_1771688 | RAB7B     | 1.71E-07 | -1.06 |
| ILMN_1664068 | ERGIC1    | 1.71E-07 | 1.16  |
| ILMN_1778523 | KLF9      | 1.82E-07 | 1.42  |
| ILMN_1669409 | VSIG4     | 2.12E-07 | 1.15  |
| ILMN_1774206 | LOC647108 | 2.21E-07 | 1.00  |
| ILMN_1800787 | RFTN1     | 2.35E-07 | -0.95 |
| ILMN_1730906 | FILIP1L   | 2.43E-07 | 1.22  |
| ILMN_1913678 |           | 2.43E-07 | 1.27  |
| ILMN_1764723 | SH3PXD2B  | 2.43E-07 | 0.93  |
| ILMN_1711888 | COBL      | 2.50E-07 | 1.38  |
| ILMN_2408572 | RNASE4    | 2.66E-07 | 1.12  |
| ILMN_1663042 | SDC4      | 2.83E-07 | 1.00  |
| ILMN_1741712 | MS4A4A    | 3.14E-07 | 0.76  |
| ILMN_2129505 | CYBASC3   | 3.21E-07 | -0.95 |
| ILMN_3234142 | LOC728855 | 3.25E-07 | 1.02  |
| ILMN_1778836 | SFRS7     | 3.31E-07 | -0.94 |
| ILMN_1709204 | CLEC4A    | 3.62E-07 | -1.34 |
| ILMN_1676563 | HTRA1     | 3.62E-07 | 1.26  |
| ILMN_2053415 | LDLR      | 3.66E-07 | -1.02 |
| ILMN_1790689 | CRISPLD2  | 3.67E-07 | 1.42  |
| ILMN_2368530 | IL32      | 3.74E-07 | 1.14  |
| ILMN_2373982 | PICK1     | 3.89E-07 | 1.09  |
| ILMN_1655549 | SIGLEC10  | 3.89E-07 | 1.03  |
| ILMN_2276904 | ALOX15B   | 3.96E-07 | 0.92  |
| ILMN_1711608 | SSBP2     | 3.98E-07 | 1.16  |
| ILMN_1770610 | MERTK     | 3.98E-07 | 0.91  |
| ILMN_1696974 | ANG       | 4.46E-07 | 1.07  |
| ILMN_2391150 | FILIP1L   | 4.74E-07 | 0.96  |
| ILMN_1797875 | ALOX5AP   | 5.08E-07 | 1.17  |

|              |           |          |       |
|--------------|-----------|----------|-------|
| ILMN_2294976 | RNASE4    | 5.30E-07 | 1.19  |
| ILMN_3241378 | LOC728448 | 5.39E-07 | 0.93  |
| ILMN_1720998 | CA12      | 5.63E-07 | 1.98  |
| ILMN_2386973 | PKP2      | 5.63E-07 | 1.29  |
| ILMN_1716797 | CD302     | 5.64E-07 | 0.99  |
| ILMN_1701032 | TFPI      | 5.64E-07 | 1.16  |
| ILMN_2148819 | TUBA1A    | 5.74E-07 | -0.95 |
| ILMN_1794875 | AGPAT9    | 5.86E-07 | -1.40 |
| ILMN_2370336 | MS4A4A    | 6.07E-07 | 0.98  |
| ILMN_2195236 | PGRMC2    | 6.07E-07 | 1.14  |
| ILMN_1682312 | CYBB      | 6.57E-07 | -1.26 |
| ILMN_1697448 | TXNIP     | 6.71E-07 | 1.05  |
| ILMN_3200211 | LOC643680 | 6.75E-07 | 1.22  |
| ILMN_1808707 | FSCN1     | 6.98E-07 | -0.88 |
| ILMN_1741404 | MSC       | 7.32E-07 | -0.91 |
| ILMN_2352953 | CPM       | 7.81E-07 | 0.96  |
| ILMN_2054297 | PTGS2     | 8.19E-07 | -0.79 |
| ILMN_1739605 | LYPD3     | 9.16E-07 | 0.61  |
| ILMN_1669617 | GRB10     | 9.44E-07 | 0.82  |
| ILMN_2294978 | RNASE4    | 9.58E-07 | 1.11  |
| ILMN_1708934 | ADM       | 9.58E-07 | 1.06  |
| ILMN_1782953 | MMP19     | 9.58E-07 | 0.65  |
| ILMN_1733259 | ADORA3    | 9.58E-07 | 1.94  |
| ILMN_1678170 | MME       | 9.59E-07 | 0.52  |
| ILMN_1690170 | CRABP2    | 9.98E-07 | -1.30 |
| ILMN_1692466 | LOC728637 | 1.03E-06 | -0.61 |
| ILMN_1701134 | PTEN      | 1.08E-06 | 0.86  |
| ILMN_1795285 | PHF15     | 1.13E-06 | 0.82  |
| ILMN_2083469 | IRS2      | 1.16E-06 | 1.28  |
| ILMN_1705750 | TGM2      | 1.17E-06 | -1.02 |
| ILMN_2138589 | MERTK     | 1.17E-06 | 0.82  |
| ILMN_2379599 | CD163     | 1.17E-06 | 1.87  |
| ILMN_1805410 | C15orf48  | 1.17E-06 | -0.86 |
| ILMN_2374865 | ATF3      | 1.17E-06 | -1.68 |
| ILMN_1738095 | PER2      | 1.24E-06 | -1.11 |
| ILMN_1730454 | FOLR3     | 1.24E-06 | -1.09 |
| ILMN_1728106 | TNF       | 1.25E-06 | -0.75 |
| ILMN_1782050 | CEBPD     | 1.25E-06 | 1.18  |
| ILMN_1722622 | CD163     | 1.25E-06 | 1.91  |
| ILMN_1774547 | MPRIP     | 1.29E-06 | 0.79  |
| ILMN_2166457 | HPGD      | 1.34E-06 | 0.99  |
| ILMN_1769388 | GJB2      | 1.37E-06 | -1.12 |
| ILMN_1692535 | DPP4      | 1.48E-06 | 1.28  |
| ILMN_1781761 | ENPP4     | 1.50E-06 | 1.10  |
| ILMN_1707312 | NFIL3     | 1.59E-06 | 0.93  |
| ILMN_1785902 | C1QC      | 1.62E-06 | 1.05  |

|              |           |          |       |
|--------------|-----------|----------|-------|
| ILMN_1842850 |           | 1.64E-06 | 0.83  |
| ILMN_1765557 | OLFML2B   | 1.64E-06 | 0.95  |
| ILMN_1800261 | TUBA1B    | 1.64E-06 | -0.91 |
| ILMN_2339835 | PTGS1     | 1.68E-06 | -0.99 |
| ILMN_2199439 | CA2       | 1.68E-06 | -0.77 |
| ILMN_3246054 | LOC732415 | 1.69E-06 | 0.82  |
| ILMN_1739942 | FAM117B   | 1.70E-06 | 1.30  |
| ILMN_1700967 | C3orf59   | 1.70E-06 | -0.76 |
| ILMN_1810584 | IL1R1     | 1.73E-06 | 0.74  |
| ILMN_1793730 | TM7SF4    | 1.75E-06 | -1.07 |
| ILMN_1795930 | PTGER4    | 1.81E-06 | -0.99 |
| ILMN_1689329 | SCD       | 1.85E-06 | -1.03 |
| ILMN_1778010 | IL32      | 1.87E-06 | 0.75  |
| ILMN_1743241 | ARL4A     | 1.87E-06 | 0.94  |
| ILMN_1674160 | BIN1      | 1.92E-06 | 0.83  |
| ILMN_1682099 | TNFAIP8L3 | 1.94E-06 | 0.89  |
| ILMN_1768505 | IL13RA1   | 1.99E-06 | 0.78  |
| ILMN_1686562 | KIF13B    | 2.04E-06 | 1.13  |
| ILMN_1721035 | MS4A6A    | 2.19E-06 | 1.08  |
| ILMN_1800638 | CUGBP2    | 2.30E-06 | 0.88  |
| ILMN_1663640 | MAOA      | 2.37E-06 | 1.46  |
| ILMN_1682717 | IER3      | 2.37E-06 | -1.07 |
| ILMN_1710075 | FAM89A    | 2.37E-06 | 0.79  |
| ILMN_1742167 | TUBA1C    | 2.41E-06 | -1.02 |
| ILMN_1679322 | SH2D4A    | 2.47E-06 | 0.43  |
| ILMN_1707339 | BTG3      | 2.50E-06 | -0.79 |
| ILMN_1782938 | SLC16A10  | 2.51E-06 | 1.14  |
| ILMN_1776967 | LRRC50    | 2.53E-06 | 0.82  |
| ILMN_1684368 | C5orf62   | 2.53E-06 | 1.05  |
| ILMN_2121408 | HBEGF     | 2.80E-06 | -1.01 |
| ILMN_1752755 | VWF       | 2.90E-06 | -0.94 |
| ILMN_1670134 | FADS1     | 2.96E-06 | -0.73 |
| ILMN_2275742 | DNASE2B   | 3.07E-06 | 1.50  |
| ILMN_1711838 | SLC25A24  | 3.19E-06 | -0.87 |
| ILMN_2374340 | PLAUR     | 3.29E-06 | -0.80 |
| ILMN_2081682 | SMAP2     | 3.59E-06 | 0.81  |
| ILMN_1681437 | DCXR      | 3.72E-06 | 0.98  |
| ILMN_1717313 | NFKBIE    | 3.75E-06 | -0.86 |
| ILMN_2379788 | HIF1A     | 3.99E-06 | -0.78 |
| ILMN_2074748 | HAL       | 4.09E-06 | 0.55  |
| ILMN_1672834 | SSH2      | 4.13E-06 | 0.81  |
| ILMN_1709683 | RASSF2    | 4.13E-06 | 0.85  |
| ILMN_1808395 | ACAP1     | 4.16E-06 | 0.84  |
| ILMN_1747205 | JDP2      | 4.18E-06 | 0.80  |
| ILMN_1669523 | FOS       | 4.21E-06 | 1.09  |
| ILMN_1737514 | KYNU      | 4.38E-06 | -0.84 |

|              |          |          |       |
|--------------|----------|----------|-------|
| ILMN_1656285 | METTTL7A | 4.42E-06 | 1.05  |
| ILMN_1702501 | RPS6KA2  | 4.43E-06 | 0.84  |
| ILMN_2285817 | FAM89A   | 4.53E-06 | 0.74  |
| ILMN_1850238 |          | 4.55E-06 | 0.67  |
| ILMN_2294762 | AMY1A    | 4.55E-06 | -0.87 |
| ILMN_1682993 | NKG7     | 4.57E-06 | 0.76  |
| ILMN_1718977 | GADD45B  | 4.58E-06 | 0.77  |
| ILMN_1797731 | MS4A6A   | 4.71E-06 | 1.12  |
| ILMN_1780334 | KCNJ2    | 4.87E-06 | 0.78  |
| ILMN_1703955 | FBXO32   | 4.97E-06 | 0.89  |
| ILMN_1749521 | SLC35E3  | 4.97E-06 | 0.78  |
| ILMN_2047618 | KCNE1    | 5.10E-06 | 0.70  |
| ILMN_1651769 | ZFYVE16  | 5.10E-06 | -0.73 |
| ILMN_2383611 | PTPRE    | 5.18E-06 | -0.72 |
| ILMN_3243061 | SIGLEC14 | 5.28E-06 | 0.71  |
| ILMN_1773553 | FLJ46906 | 5.28E-06 | 0.77  |
| ILMN_1689088 | COLEC12  | 5.30E-06 | -0.77 |
| ILMN_1763638 | BCAR3    | 5.53E-06 | -0.62 |
| ILMN_1658494 | C13orf15 | 5.53E-06 | -0.96 |
| ILMN_1723004 | CD72     | 5.67E-06 | 1.14  |
| ILMN_2412294 | GNB5     | 5.81E-06 | 0.56  |
| ILMN_2255133 | BCL11A   | 5.83E-06 | -0.65 |
| ILMN_3247728 | RNF115   | 5.83E-06 | 0.76  |
| ILMN_3247023 | FLJ22536 | 6.01E-06 | -0.66 |
| ILMN_1771376 | PEA15    | 6.24E-06 | -0.84 |
| ILMN_2065773 | SCG5     | 6.30E-06 | -0.77 |
| ILMN_1672662 | SLC20A1  | 6.33E-06 | 1.08  |
| ILMN_2064725 | METTTL7B | 6.37E-06 | 1.14  |
| ILMN_1785852 | OBFC2A   | 6.51E-06 | -0.84 |
| ILMN_1654609 | TIGA1    | 6.98E-06 | 0.77  |
| ILMN_1702899 | PLEKHA7  | 7.11E-06 | 0.50  |
| ILMN_1784287 | TGFBR3   | 7.11E-06 | 0.40  |
| ILMN_1755504 | CALCOCO2 | 7.25E-06 | 0.69  |
| ILMN_1654268 | HMGB2    | 7.34E-06 | 0.61  |
| ILMN_1780465 | CLEC5A   | 7.41E-06 | -1.26 |
| ILMN_1687440 | HIPK2    | 7.41E-06 | 0.78  |
| ILMN_1778240 | GFOD1    | 7.43E-06 | 0.80  |
| ILMN_1720048 | CCL2     | 7.50E-06 | -1.46 |
| ILMN_1657871 | RSAD2    | 7.75E-06 | -1.05 |
| ILMN_2337655 | WARS     | 7.75E-06 | -0.84 |
| ILMN_1736180 | FRAT1    | 8.13E-06 | 0.44  |
| ILMN_1684585 | ACSL1    | 8.13E-06 | 0.92  |
| ILMN_1704571 | FAM53B   | 8.13E-06 | 0.65  |
| ILMN_1729112 | CHPT1    | 8.13E-06 | 0.88  |
| ILMN_1683475 | TOMM40   | 8.13E-06 | 1.13  |
| ILMN_1795183 | RNASE1   | 8.13E-06 | 1.14  |

|              |          |          |       |
|--------------|----------|----------|-------|
| ILMN_1735495 | TBC1D8   | 8.21E-06 | 0.93  |
| ILMN_1811997 | ZNF364   | 8.63E-06 | 0.74  |
| ILMN_1694882 | AMY2B    | 8.73E-06 | 0.52  |
| ILMN_1714433 | MARCKSL1 | 8.88E-06 | -0.87 |
| ILMN_1781468 | SMAP2    | 8.89E-06 | 0.78  |
| ILMN_1790228 | FURIN    | 8.89E-06 | 0.59  |
| ILMN_1704376 | GLDN     | 8.89E-06 | 1.21  |
| ILMN_1794165 | PGD      | 9.23E-06 | -0.69 |
| ILMN_1756992 | MUC1     | 9.28E-06 | 0.64  |
| ILMN_1737918 | C1QA     | 9.45E-06 | 0.73  |
| ILMN_1712112 | RCAN1    | 9.92E-06 | 1.08  |
| ILMN_1774874 | IL1RN    | 9.98E-06 | -1.67 |
| ILMN_1717056 | TXNRD1   | 9.99E-06 | -0.87 |
| ILMN_1758864 | VNN2     | 1.01E-05 | -0.88 |
| ILMN_1664761 | TMEM138  | 1.02E-05 | -1.07 |
| ILMN_1688373 | LST1     | 1.03E-05 | -0.80 |
| ILMN_1686116 | THBS1    | 1.04E-05 | 1.01  |
| ILMN_1655612 | ARRDC2   | 1.04E-05 | 0.74  |
| ILMN_1766914 | MFAP4    | 1.04E-05 | 0.56  |
| ILMN_1746517 | KYNU     | 1.11E-05 | -0.68 |
| ILMN_1686109 | CCL23    | 1.14E-05 | -0.94 |
| ILMN_1662362 | LGR6     | 1.17E-05 | 0.51  |
| ILMN_1677038 | FLJ21986 | 1.17E-05 | -0.74 |
| ILMN_1721116 | USP10    | 1.18E-05 | 0.60  |
| ILMN_1667043 | EIF4A3   | 1.18E-05 | 0.81  |
| ILMN_1653498 | IGSF6    | 1.22E-05 | -0.89 |
| ILMN_1701017 | SAA1     | 1.22E-05 | 0.38  |
| ILMN_1781416 | FRAT1    | 1.26E-05 | 0.68  |
| ILMN_1659960 | IL4I1    | 1.26E-05 | -0.66 |
| ILMN_1681703 | FOXO3    | 1.27E-05 | 0.69  |
| ILMN_1733680 | AZI2     | 1.29E-05 | 0.68  |
| ILMN_1701248 | TREM2    | 1.29E-05 | -0.77 |
| ILMN_1727402 | HCLS1    | 1.30E-05 | 0.65  |
| ILMN_1802780 | M160     | 1.34E-05 | 0.52  |
| ILMN_1764030 | CCL23    | 1.35E-05 | -0.81 |
| ILMN_1757343 | PABPC4   | 1.36E-05 | 0.64  |
| ILMN_1703074 | CPD      | 1.38E-05 | 0.97  |
| ILMN_1711062 | MMP19    | 1.40E-05 | 0.50  |
| ILMN_1710923 | SLAMF7   | 1.43E-05 | -0.82 |
| ILMN_1743784 | SHMT1    | 1.48E-05 | 0.38  |
| ILMN_1804822 | SRXN1    | 1.51E-05 | -0.83 |
| ILMN_1685176 | SGMS2    | 1.52E-05 | 0.49  |
| ILMN_1712026 | NLRP3    | 1.52E-05 | -0.74 |
| ILMN_1759097 | MLLT11   | 1.53E-05 | -0.50 |
| ILMN_1740572 | TCN2     | 1.55E-05 | 1.00  |
| ILMN_2345353 | LST1     | 1.57E-05 | -0.83 |

|              |            |          |       |
|--------------|------------|----------|-------|
| ILMN_1720158 | ETS2       | 1.61E-05 | 0.67  |
| ILMN_1758673 | SLC44A1    | 1.61E-05 | 0.72  |
| ILMN_2138765 | PLIN2      | 1.63E-05 | 0.78  |
| ILMN_1789130 | DNASE2B    | 1.67E-05 | 1.46  |
| ILMN_1736829 | MDM2       | 1.68E-05 | 0.69  |
| ILMN_2200917 | SLC4A7     | 1.73E-05 | -0.84 |
| ILMN_1808047 | PHC2       | 1.73E-05 | 0.72  |
| ILMN_3236556 | UBXN2B     | 1.73E-05 | 0.70  |
| ILMN_1656904 | SLC1A4     | 1.78E-05 | -0.78 |
| ILMN_2148913 | TMEM45A    | 1.79E-05 | 0.89  |
| ILMN_1786426 | TMEM149    | 1.80E-05 | -0.69 |
| ILMN_1798204 | IL21R      | 1.80E-05 | -0.84 |
| ILMN_1756928 | RTN1       | 1.87E-05 | -0.63 |
| ILMN_1693233 | KIAA0513   | 1.87E-05 | 0.73  |
| ILMN_1767349 | ABCB4      | 1.93E-05 | -0.26 |
| ILMN_1706344 | ABHD6      | 1.93E-05 | 0.64  |
| ILMN_1687757 | AKR1C4     | 1.96E-05 | 0.70  |
| ILMN_2073157 | AMY2B      | 2.01E-05 | 0.83  |
| ILMN_1662795 | CA2        | 2.03E-05 | -1.11 |
| ILMN_1801443 | TSKU       | 2.03E-05 | -0.56 |
| ILMN_2340919 | GRB10      | 2.03E-05 | 0.45  |
| ILMN_1665455 | DCUN1D3    | 2.03E-05 | 0.67  |
| ILMN_1798957 | C12orf47   | 2.04E-05 | 0.77  |
| ILMN_3227023 | SNHG7      | 2.04E-05 | 0.93  |
| ILMN_1700695 | SLC44A1    | 2.04E-05 | 0.89  |
| ILMN_1752526 | RNF144B    | 2.04E-05 | 0.78  |
| ILMN_2359800 | MS4A6A     | 2.04E-05 | 0.99  |
| ILMN_2099277 | HTRA4      | 2.12E-05 | -0.87 |
| ILMN_2309245 | BIN1       | 2.12E-05 | 0.80  |
| ILMN_1660986 | PER3       | 2.12E-05 | -0.55 |
| ILMN_1781700 | IL18R1     | 2.12E-05 | 1.22  |
| ILMN_1797728 | HMGCS1     | 2.12E-05 | -0.64 |
| ILMN_3244583 | NCRNA00219 | 2.15E-05 | 0.77  |
| ILMN_1793474 | INSIG1     | 2.19E-05 | -0.89 |
| ILMN_1671142 | GPR68      | 2.26E-05 | -0.89 |
| ILMN_1663866 | TGFBI      | 2.34E-05 | -0.83 |
| ILMN_1735910 | VMO1       | 2.34E-05 | -0.68 |
| ILMN_1717326 | SLC29A3    | 2.39E-05 | -0.80 |
| ILMN_2362581 | FNDC3A     | 2.46E-05 | 0.58  |
| ILMN_1761281 | LOC441019  | 2.48E-05 | 0.90  |
| ILMN_1757287 | MAPK6      | 2.50E-05 | 0.59  |
| ILMN_1789502 | GPC4       | 2.55E-05 | -0.72 |
| ILMN_1808114 | LYVE1      | 2.55E-05 | 0.24  |
| ILMN_1765641 | SEMA3A     | 2.55E-05 | -0.39 |
| ILMN_1683059 | SIRT5      | 2.72E-05 | 0.67  |
| ILMN_1677432 | SRGAP1     | 2.76E-05 | 0.48  |



|              |           |          |       |
|--------------|-----------|----------|-------|
| ILMN_1703926 | PTGER2    | 2.80E-05 | 0.65  |
| ILMN_1713124 | AKR1C3    | 2.83E-05 | 1.00  |
| ILMN_1667460 | SULF2     | 2.90E-05 | -0.42 |
| ILMN_1796216 | VASH1     | 2.91E-05 | -0.66 |
| ILMN_1880406 |           | 2.91E-05 | 0.58  |
| ILMN_1780898 | PRKCH     | 2.91E-05 | 1.09  |
| ILMN_1716547 | NAGK      | 2.92E-05 | -0.71 |
| ILMN_2366388 | PRDX1     | 3.08E-05 | -0.65 |
| ILMN_1715131 | CCR7      | 3.09E-05 | -0.95 |
| ILMN_1810235 | ATP6V1E2  | 3.09E-05 | 0.42  |
| ILMN_1791647 | ASIP      | 3.10E-05 | 0.66  |
| ILMN_1670302 | HK3       | 3.10E-05 | -0.99 |
| ILMN_1669376 | DRAM1     | 3.11E-05 | -0.68 |
| ILMN_1683313 | ST3GAL1   | 3.23E-05 | -0.63 |
| ILMN_1706511 | TEF       | 3.25E-05 | -0.42 |
| ILMN_1795158 | FGR       | 3.29E-05 | 0.83  |
| ILMN_1765701 | LOC399942 | 3.33E-05 | -0.75 |
| ILMN_1727271 | WARS      | 3.38E-05 | -0.87 |
| ILMN_1763852 | ACACB     | 3.41E-05 | 0.66  |
| ILMN_1803429 | CD44      | 3.49E-05 | -0.63 |
| ILMN_1666553 | SLC25A19  | 3.64E-05 | -0.74 |
| ILMN_1702320 | JAKMIP2   | 3.73E-05 | -0.60 |
| ILMN_1795762 | PLEK      | 3.73E-05 | -0.65 |
| ILMN_1681252 | C17orf44  | 3.77E-05 | 0.55  |
| ILMN_1696187 | PYGL      | 3.78E-05 | -0.60 |
| ILMN_1801077 | PLIN2     | 3.82E-05 | 0.86  |
| ILMN_2140999 | ZFYVE16   | 3.85E-05 | -0.50 |
| ILMN_1793410 | SNTB1     | 3.86E-05 | 0.65  |
| ILMN_2069224 | PVALB     | 3.87E-05 | -0.75 |
| ILMN_1729691 | SLC16A6   | 3.87E-05 | 0.55  |
| ILMN_2352303 | RASSF2    | 3.88E-05 | 0.79  |
| ILMN_2141482 | SERPINF1  | 3.88E-05 | 0.60  |
| ILMN_1791511 | TMEM176A  | 3.89E-05 | -0.74 |
| ILMN_1694240 | MAP2K1    | 3.89E-05 | 0.82  |
| ILMN_2352090 | GPRC5C    | 3.90E-05 | 0.58  |
| ILMN_1746588 | TALDO1    | 3.90E-05 | -0.60 |
| ILMN_1710092 | ZBTB46    | 3.95E-05 | -0.43 |
| ILMN_1716026 | ARMCX6    | 3.96E-05 | 0.62  |
| ILMN_1904138 |           | 3.96E-05 | 0.45  |
| ILMN_1753663 | ARL4A     | 3.96E-05 | 0.32  |
| ILMN_1804935 | VNN3      | 4.06E-05 | 0.50  |
| ILMN_1677765 | LRP8      | 4.17E-05 | -0.45 |
| ILMN_2330966 | PTK2B     | 4.29E-05 | 0.47  |
| ILMN_1678939 | VNN2      | 4.29E-05 | -0.89 |
| ILMN_2093343 | PLAC8     | 4.47E-05 | -0.66 |
| ILMN_2202940 | CHPT1     | 4.50E-05 | 0.77  |

|              |              |          |       |
|--------------|--------------|----------|-------|
| ILMN_2333670 | RNASE1       | 4.50E-05 | 1.03  |
| ILMN_2168217 | EBI2         | 4.50E-05 | 1.01  |
| ILMN_1699082 | MAPKAPK5     | 4.63E-05 | 0.55  |
| ILMN_3236036 | LOC283663    | 4.66E-05 | 0.39  |
| ILMN_1723035 | OLR1         | 4.78E-05 | -0.78 |
| ILMN_1653026 | PLAC8        | 4.84E-05 | -0.50 |
| ILMN_1915076 |              | 4.89E-05 | 1.21  |
| ILMN_1680139 | MAFF         | 4.89E-05 | -0.45 |
| ILMN_1730622 | EVL          | 4.92E-05 | -0.56 |
| ILMN_1777190 | CFD          | 4.92E-05 | 0.70  |
| ILMN_2065690 | GRAMD3       | 4.93E-05 | 0.86  |
| ILMN_1685703 | ACOX2        | 5.02E-05 | -0.85 |
| ILMN_1780397 | TRAF3IP3     | 5.10E-05 | -0.29 |
| ILMN_1745034 | SLC11A2      | 5.10E-05 | 0.68  |
| ILMN_1654819 | ZNF589       | 5.19E-05 | 0.54  |
| ILMN_1790985 | dJ341D10.1   | 5.20E-05 | 0.74  |
| ILMN_1800837 | CFDP1        | 5.20E-05 | 0.63  |
| ILMN_1812091 | FAM20A       | 5.24E-05 | -0.46 |
| ILMN_2087656 | SLCO2B1      | 5.33E-05 | 0.65  |
| ILMN_1714759 | CNIH4        | 5.34E-05 | 0.67  |
| ILMN_1743367 | FZD4         | 5.34E-05 | 1.68  |
| ILMN_1868851 |              | 5.39E-05 | 0.46  |
| ILMN_2160476 | CCL22        | 5.40E-05 | -1.37 |
| ILMN_1702691 | TNFAIP3      | 5.42E-05 | 0.67  |
| ILMN_1740418 | CYP27B1      | 5.42E-05 | -0.89 |
| ILMN_1759792 | CLIP4        | 5.43E-05 | 0.70  |
| ILMN_1811765 | ADAMTS2      | 5.43E-05 | 0.47  |
| ILMN_3211935 | LOC100132715 | 5.44E-05 | -0.57 |
| ILMN_1681283 | HIF1A        | 5.50E-05 | -0.49 |
| ILMN_1762713 | C19orf59     | 5.67E-05 | 0.93  |
| ILMN_1778321 | SLC2A6       | 5.79E-05 | -0.65 |
| ILMN_1780546 | OSM          | 5.88E-05 | -1.09 |
| ILMN_3235003 | LOC100132395 | 5.88E-05 | 0.41  |
| ILMN_2408543 | PLAUR        | 5.90E-05 | -0.68 |
| ILMN_1734543 | PTPRE        | 5.90E-05 | -0.62 |
| ILMN_1809467 | VAMP5        | 5.95E-05 | 0.63  |
| ILMN_1776905 | FAM23B       | 5.95E-05 | 0.79  |
| ILMN_1725510 | DHCR24       | 5.97E-05 | 0.60  |
| ILMN_1679093 | ZNF581       | 5.97E-05 | 0.59  |
| ILMN_1727532 | OLFML3       | 5.99E-05 | 0.71  |
| ILMN_1737089 | CAPN5        | 6.07E-05 | -0.37 |
| ILMN_1726597 | FAM65B       | 6.12E-05 | 0.49  |
| ILMN_1686664 | MT2A         | 6.12E-05 | 0.70  |
| ILMN_1735680 | TMEM30A      | 6.17E-05 | -0.56 |
| ILMN_1769412 | RAPGEF1      | 6.35E-05 | -0.59 |
| ILMN_1656378 | NMT2         | 6.35E-05 | -0.77 |

|              |           |          |       |
|--------------|-----------|----------|-------|
| ILMN_1744381 | SERPINE1  | 6.45E-05 | 0.96  |
| ILMN_1715809 | OGFRL1    | 6.59E-05 | 0.60  |
| ILMN_1742187 | MAN1A1    | 6.62E-05 | 0.54  |
| ILMN_1688480 | CCND1     | 6.76E-05 | -1.23 |
| ILMN_2129563 | LDLRAD3   | 6.79E-05 | 0.30  |
| ILMN_1656818 | GPR141    | 6.88E-05 | -0.38 |
| ILMN_2366391 | PRDX1     | 6.88E-05 | -0.62 |
| ILMN_1778377 | ERGIC1    | 6.95E-05 | 0.50  |
| ILMN_1703016 | CACNA1G   | 6.95E-05 | 0.34  |
| ILMN_2070940 | CD302     | 7.05E-05 | 0.33  |
| ILMN_2092333 | GPR141    | 7.11E-05 | -0.45 |
| ILMN_1730575 | GCLC      | 7.12E-05 | 0.79  |
| ILMN_1689734 | IL1RN     | 7.20E-05 | -1.13 |
| ILMN_1718936 | LST1      | 7.50E-05 | -0.64 |
| ILMN_1756541 | MXD4      | 7.71E-05 | 0.59  |
| ILMN_1687508 | ALDH7A1   | 7.96E-05 | 0.65  |
| ILMN_2094262 | AMY1B     | 8.01E-05 | 0.37  |
| ILMN_2170814 | LAMP3     | 8.03E-05 | -1.06 |
| ILMN_1814998 | FKSG30    | 8.07E-05 | -0.80 |
| ILMN_1712532 | CARD9     | 8.09E-05 | -0.63 |
| ILMN_1704369 | LIMA1     | 8.09E-05 | -0.64 |
| ILMN_1668822 | BATF      | 8.09E-05 | 0.83  |
| ILMN_2142979 | PTBP2     | 8.09E-05 | 0.37  |
| ILMN_1746013 | SPOCK1    | 8.24E-05 | 0.41  |
| ILMN_1714567 | AHNAK     | 8.25E-05 | 0.67  |
| ILMN_1749403 | TSPAN33   | 8.25E-05 | -0.69 |
| ILMN_1755873 | EMR3      | 8.26E-05 | -0.35 |
| ILMN_1662640 | C20orf127 | 8.35E-05 | 0.64  |
| ILMN_2169261 | TNNI2     | 8.35E-05 | -0.51 |
| ILMN_2174574 | HNRNPA3P1 | 8.35E-05 | -0.54 |
| ILMN_1799015 | PXMP2     | 8.35E-05 | 0.53  |
| ILMN_1704531 | PTGR1     | 8.49E-05 | -0.71 |
| ILMN_1673795 | HSD17B4   | 8.79E-05 | 0.88  |
| ILMN_2310896 | NLRP3     | 8.79E-05 | -0.64 |
| ILMN_1771019 | MTMR4     | 8.87E-05 | 0.78  |
| ILMN_2324421 | TXNRD1    | 8.89E-05 | -0.65 |
| ILMN_2397024 | SPOP      | 8.98E-05 | 0.55  |
| ILMN_1713867 | PMFBP1    | 8.98E-05 | 0.51  |
| ILMN_1663313 | AMY1C     | 9.08E-05 | -0.73 |
| ILMN_1666546 | DUSP14    | 9.08E-05 | -0.59 |
| ILMN_1654112 | PARD6A    | 9.11E-05 | 0.54  |
| ILMN_2235851 | LINCR     | 9.14E-05 | -0.50 |
| ILMN_1806809 | ZNF189    | 9.27E-05 | 0.53  |
| ILMN_1714945 | ITPKC     | 9.27E-05 | 0.33  |
| ILMN_2301722 | PDE8B     | 9.47E-05 | 0.29  |
| ILMN_1691846 | G0S2      | 9.49E-05 | -0.36 |

|              |           |          |       |
|--------------|-----------|----------|-------|
| ILMN_1695590 | ADRB2     | 9.50E-05 | 0.55  |
| ILMN_2165993 | ITLN1     | 9.50E-05 | 0.36  |
| ILMN_1791147 | YPEL3     | 9.63E-05 | 0.53  |
| ILMN_1802808 | LOC654103 | 9.70E-05 | 0.67  |
| ILMN_2312340 | LILRB2    | 9.91E-05 | -0.72 |
| ILMN_1715969 | SLC25A37  | 9.91E-05 | 0.52  |
| ILMN_2368318 | FGR       | 9.91E-05 | 0.71  |
| ILMN_1706217 | TLR4      | 1.01E-04 | 0.55  |
| ILMN_3188984 | C20orf199 | 1.03E-04 | 0.57  |
| ILMN_1746171 | H2AFY     | 1.08E-04 | 0.74  |
| ILMN_1794825 | ALDH3A2   | 1.08E-04 | -0.54 |
| ILMN_2062754 | SRA1      | 1.09E-04 | -0.44 |
| ILMN_1657395 | HMGCR     | 1.09E-04 | -0.72 |
| ILMN_2383383 | PIR       | 1.10E-04 | -0.46 |
| ILMN_2225537 | PTGR1     | 1.12E-04 | -0.78 |
| ILMN_1808732 | SAA1      | 1.13E-04 | 0.45  |
| ILMN_1873620 |           | 1.15E-04 | 0.40  |
| ILMN_2085012 | TMEM176B  | 1.16E-04 | -0.46 |
| ILMN_3294024 | LOC644990 | 1.18E-04 | 0.30  |
| ILMN_2055634 | TIAF1     | 1.20E-04 | -0.51 |
| ILMN_1669599 | DENND4C   | 1.20E-04 | 0.78  |
| ILMN_1729801 | S100A8    | 1.20E-04 | -0.96 |
| ILMN_1660031 | P2RY6     | 1.20E-04 | -0.48 |
| ILMN_3199755 | LOC646821 | 1.20E-04 | -0.31 |
| ILMN_2383774 | TRAF3     | 1.21E-04 | -0.32 |
| ILMN_1790909 | NFE2L2    | 1.21E-04 | -0.62 |
| ILMN_2341254 | STARD13   | 1.21E-04 | 0.60  |
| ILMN_1740185 | TPMT      | 1.22E-04 | -0.63 |
| ILMN_2366330 | FERMT3    | 1.22E-04 | -0.56 |
| ILMN_1801833 | ARHGAP24  | 1.23E-04 | 0.42  |
| ILMN_1696419 | STOM      | 1.23E-04 | 0.60  |
| ILMN_1715684 | LAMB3     | 1.24E-04 | -0.41 |
| ILMN_1775703 | TRAPPC6A  | 1.24E-04 | 0.57  |
| ILMN_3244607 | FAM117B   | 1.24E-04 | 0.60  |
| ILMN_1654516 | TMEM120A  | 1.26E-04 | 0.73  |
| ILMN_1716368 | CCDC111   | 1.27E-04 | 0.41  |
| ILMN_1718558 | PARP12    | 1.27E-04 | -0.52 |
| ILMN_2165867 | DHCR7     | 1.27E-04 | -0.43 |
| ILMN_2189222 | KLHL8     | 1.29E-04 | 0.65  |
| ILMN_1655229 | SLC7A11   | 1.31E-04 | -0.63 |
| ILMN_2348788 | CD44      | 1.31E-04 | -0.79 |
| ILMN_1843198 |           | 1.33E-04 | -0.57 |
| ILMN_2405185 | AOC2      | 1.34E-04 | 0.24  |
| ILMN_2345142 | SULF2     | 1.34E-04 | -0.33 |
| ILMN_1806651 | PARP8     | 1.37E-04 | 0.64  |
| ILMN_1776649 | LRRK2     | 1.37E-04 | 0.62  |

|              |              |          |       |
|--------------|--------------|----------|-------|
| ILMN_1805902 | ELA1         | 1.37E-04 | 0.43  |
| ILMN_2382942 | CA12         | 1.38E-04 | 0.73  |
| ILMN_1695423 | CD9          | 1.38E-04 | -0.62 |
| ILMN_1785202 | STAT4        | 1.39E-04 | -0.51 |
| ILMN_1780533 | RNASE6       | 1.40E-04 | 0.60  |
| ILMN_1779886 | TBC1D14      | 1.40E-04 | 0.52  |
| ILMN_3301740 | LOC729887    | 1.40E-04 | 0.47  |
| ILMN_1735548 | HIVEP1       | 1.42E-04 | -0.35 |
| ILMN_3210491 | LOC389049    | 1.42E-04 | 0.41  |
| ILMN_1676528 | BTN3A2       | 1.44E-04 | 0.45  |
| ILMN_1655311 | LOC145853    | 1.45E-04 | 0.56  |
| ILMN_1658995 | ACOT9        | 1.45E-04 | -0.58 |
| ILMN_2052208 | GADD45A      | 1.46E-04 | 0.59  |
| ILMN_2170949 | SNX10        | 1.47E-04 | 0.73  |
| ILMN_2214678 | MXD1         | 1.50E-04 | -0.68 |
| ILMN_1723962 | LXN          | 1.50E-04 | -0.51 |
| ILMN_1808999 | ARHGEF19     | 1.51E-04 | 0.81  |
| ILMN_1754121 | CSK          | 1.52E-04 | -0.61 |
| ILMN_2341595 | KITLG        | 1.52E-04 | -0.51 |
| ILMN_1677200 | CYFIP2       | 1.53E-04 | 0.53  |
| ILMN_1751228 | C20orf46     | 1.54E-04 | -0.51 |
| ILMN_3249667 | LOC100133678 | 1.55E-04 | -0.63 |
| ILMN_2338038 | AK3L1        | 1.56E-04 | -0.65 |
| ILMN_1810725 | FAM129A      | 1.56E-04 | -0.72 |
| ILMN_1722981 | TLR5         | 1.58E-04 | 0.66  |
| ILMN_1767129 | ABCC8        | 1.59E-04 | 0.36  |
| ILMN_1734229 | SPPL2A       | 1.62E-04 | -0.47 |
| ILMN_1799208 | CSGALNACT2   | 1.62E-04 | 0.65  |
| ILMN_3238435 | SNORA12      | 1.62E-04 | 0.76  |
| ILMN_2085862 | SLC15A3      | 1.62E-04 | -0.52 |
| ILMN_1748844 | CNKSR3       | 1.66E-04 | -0.36 |
| ILMN_1661109 | ATF3         | 1.66E-04 | -0.62 |
| ILMN_2376502 | RHOBTB1      | 1.68E-04 | 0.37  |
| ILMN_1781356 | TSC22D3      | 1.69E-04 | 0.23  |
| ILMN_1691930 | CBX6         | 1.69E-04 | -0.59 |
| ILMN_1912737 |              | 1.73E-04 | 0.55  |
| ILMN_1659352 | KCNK13       | 1.73E-04 | -0.64 |
| ILMN_1746578 | SLC23A2      | 1.76E-04 | -0.52 |
| ILMN_1707434 | LOC653778    | 1.78E-04 | 0.44  |
| ILMN_1720889 | SC4MOL       | 1.79E-04 | -0.67 |
| ILMN_1775380 | SMOX         | 1.80E-04 | -0.47 |
| ILMN_1702787 | SEMA4A       | 1.80E-04 | -0.55 |
| ILMN_2154836 | BTG3         | 1.80E-04 | -0.51 |
| ILMN_1736042 | ME1          | 1.80E-04 | -0.48 |
| ILMN_1698218 | TRAF1        | 1.80E-04 | -0.36 |
| ILMN_2056606 | PPP1R1A      | 1.81E-04 | 0.42  |

|              |           |          |       |
|--------------|-----------|----------|-------|
| ILMN_2061043 | CD48      | 1.82E-04 | -0.65 |
| ILMN_1714401 | SNX27     | 1.83E-04 | 0.59  |
| ILMN_3247139 | C17orf96  | 1.83E-04 | -0.62 |
| ILMN_1752899 | BCL11A    | 1.85E-04 | -0.65 |
| ILMN_1777296 | ACTB      | 1.85E-04 | -0.81 |
| ILMN_1714197 | ACSS2     | 1.87E-04 | -0.49 |
| ILMN_1761199 | SLCO2B1   | 1.88E-04 | 0.60  |
| ILMN_1682572 | KIAA0528  | 1.90E-04 | 0.60  |
| ILMN_2179726 | C16orf93  | 1.90E-04 | -0.46 |
| ILMN_1801476 | CDS1      | 1.91E-04 | -0.28 |
| ILMN_1796642 | NCF2      | 1.94E-04 | -0.57 |
| ILMN_1653871 | NAMPT     | 1.94E-04 | -0.54 |
| ILMN_1793476 | PRKCDBP   | 1.94E-04 | -0.67 |
| ILMN_3235832 | LOC728835 | 1.98E-04 | -0.67 |
| ILMN_1810852 | LAMC1     | 1.98E-04 | 0.49  |
| ILMN_1768814 | KLHL6     | 1.98E-04 | 0.57  |
| ILMN_1800425 | SLC9A1    | 1.99E-04 | -0.46 |
| ILMN_1758281 | CALCRL    | 2.00E-04 | 0.43  |
| ILMN_1810191 | PLA2G4C   | 2.04E-04 | -0.66 |
| ILMN_1750800 | ACO1      | 2.08E-04 | -0.54 |
| ILMN_1705570 | H2AFY2    | 2.09E-04 | -0.51 |
| ILMN_1685834 | AMPH      | 2.12E-04 | 0.47  |
| ILMN_1677511 | PTGS2     | 2.12E-04 | -0.29 |
| ILMN_1688152 | IL27RA    | 2.12E-04 | 0.53  |
| ILMN_1750974 | S100A9    | 2.13E-04 | -0.72 |
| ILMN_2197365 | RGS2      | 2.15E-04 | 0.83  |
| ILMN_1774733 | SOCS1     | 2.15E-04 | 0.23  |
| ILMN_1815168 | HVCN1     | 2.15E-04 | -0.50 |
| ILMN_1652677 | FAM89A    | 2.20E-04 | 0.46  |
| ILMN_1810953 | LOC653496 | 2.21E-04 | 0.39  |
| ILMN_1773154 | NFKBIA    | 2.22E-04 | 0.60  |
| ILMN_1671404 | SVIL      | 2.23E-04 | -0.29 |
| ILMN_1779857 | KLF4      | 2.28E-04 | 0.40  |
| ILMN_2228035 | HS3ST1    | 2.33E-04 | -0.41 |
| ILMN_1754894 | C1orf162  | 2.36E-04 | 0.50  |
| ILMN_1844692 | FOXO3     | 2.38E-04 | 0.64  |
| ILMN_2092077 | PIP       | 2.39E-04 | 0.22  |
| ILMN_1811909 | LOC402221 | 2.39E-04 | -0.61 |
| ILMN_1680856 | MAMLD1    | 2.41E-04 | 0.50  |
| ILMN_1768181 | TOR3A     | 2.44E-04 | -0.63 |
| ILMN_1771264 | ELL3      | 2.44E-04 | 0.32  |
| ILMN_2322935 | MAPKAPK5  | 2.44E-04 | 0.67  |
| ILMN_2202915 | FAR2      | 2.44E-04 | 0.50  |
| ILMN_1770824 | ARHGAP4   | 2.49E-04 | -0.65 |
| ILMN_3251436 | DENND4C   | 2.50E-04 | 0.71  |
| ILMN_1746888 | PCOLCE2   | 2.52E-04 | 0.56  |

|              |              |          |       |
|--------------|--------------|----------|-------|
| ILMN_2150402 | TMEM64       | 2.52E-04 | 0.36  |
| ILMN_1812618 | ARAP3        | 2.53E-04 | -0.54 |
| ILMN_1652407 | ZMYND8       | 2.54E-04 | 0.38  |
| ILMN_1662846 | GPR160       | 2.57E-04 | -0.44 |
| ILMN_1653125 | PER1         | 2.59E-04 | 0.15  |
| ILMN_1716468 | LOC152195    | 2.59E-04 | 0.37  |
| ILMN_1770922 | TMEM45A      | 2.59E-04 | 0.66  |
| ILMN_2241953 | PILRA        | 2.60E-04 | -0.51 |
| ILMN_1674034 | H2AFY        | 2.66E-04 | 0.71  |
| ILMN_1692517 | LOC653381    | 2.68E-04 | -0.59 |
| ILMN_1656501 | DUSP5        | 2.72E-04 | -0.60 |
| ILMN_1763386 | BID          | 2.72E-04 | -0.53 |
| ILMN_1658504 | CHKA         | 2.72E-04 | 0.52  |
| ILMN_3234948 | LOC100130000 | 2.78E-04 | 0.25  |
| ILMN_1695991 | COLQ         | 2.78E-04 | -0.39 |
| ILMN_1795963 | OKL38        | 2.78E-04 | -0.78 |
| ILMN_1738816 | FOXO1        | 2.79E-04 | 0.43  |
| ILMN_2157441 | HLA-DRA      | 2.80E-04 | -0.60 |
| ILMN_1785060 | TSPAN14      | 2.81E-04 | 0.47  |
| ILMN_1748090 | SLC2A11      | 2.82E-04 | 0.47  |
| ILMN_2136089 | MTE          | 2.84E-04 | 0.58  |
| ILMN_1683806 | MRC1L1       | 2.84E-04 | 0.41  |
| ILMN_1693334 | P4HA1        | 2.84E-04 | -0.50 |
| ILMN_1724708 | RAB33A       | 2.87E-04 | 0.42  |
| ILMN_1726327 | AMY1B        | 2.87E-04 | -0.35 |
| ILMN_2171384 | CXCL5        | 2.90E-04 | -0.64 |
| ILMN_2082314 | TOM1         | 2.90E-04 | -0.49 |
| ILMN_1652280 | FBXO32       | 2.97E-04 | 0.34  |
| ILMN_1696407 | SFRS2        | 2.97E-04 | -0.54 |
| ILMN_1691339 | CLEC1A       | 2.97E-04 | 0.42  |
| ILMN_1694810 | PANX2        | 3.07E-04 | -0.40 |
| ILMN_3239937 | NUDT16P      | 3.07E-04 | 0.34  |
| ILMN_1668063 | FCN1         | 3.07E-04 | -0.61 |
| ILMN_1864422 |              | 3.09E-04 | 0.47  |
| ILMN_2077550 | RACGAP1      | 3.12E-04 | 0.41  |
| ILMN_1793729 | C15orf39     | 3.13E-04 | -0.30 |
| ILMN_1811258 | RELB         | 3.14E-04 | -0.32 |
| ILMN_2066060 | HLA-DRB6     | 3.15E-04 | -0.52 |
| ILMN_1890253 |              | 3.20E-04 | 0.29  |
| ILMN_1732318 | PTK2B        | 3.21E-04 | 0.28  |
| ILMN_1776516 | ITPKA        | 3.22E-04 | 0.44  |
| ILMN_1705111 | FNDC3A       | 3.22E-04 | 0.58  |
| ILMN_1716276 | CCL4L2       | 3.22E-04 | -0.63 |
| ILMN_1750549 | PI4K2A       | 3.22E-04 | -0.44 |
| ILMN_3237419 | LOC727980    | 3.23E-04 | 0.26  |
| ILMN_1660727 | ENPP5        | 3.23E-04 | 0.16  |

|              |           |          |       |
|--------------|-----------|----------|-------|
| ILMN_1713143 | MRPL3     | 3.26E-04 | 0.50  |
| ILMN_1670926 | CHST15    | 3.26E-04 | -0.51 |
| ILMN_1794677 | TMC6      | 3.29E-04 | -0.49 |
| ILMN_3251526 | USP13     | 3.29E-04 | -0.28 |
| ILMN_1729987 | SRC       | 3.29E-04 | -0.55 |
| ILMN_1785161 | CHCHD6    | 3.33E-04 | 0.38  |
| ILMN_2243308 | ACVR1B    | 3.33E-04 | 0.47  |
| ILMN_1799889 | ATP6V0D2  | 3.33E-04 | -0.55 |
| ILMN_1684357 | C14orf139 | 3.33E-04 | 0.28  |
| ILMN_1781536 | FAH       | 3.33E-04 | 0.46  |
| ILMN_3251341 | TUBA1C    | 3.34E-04 | -0.56 |
| ILMN_3249748 | LDHA      | 3.35E-04 | 0.56  |
| ILMN_1815951 | PCYOX1L   | 3.36E-04 | 0.34  |
| ILMN_1703852 | EFNB2     | 3.43E-04 | 0.34  |
| ILMN_1755364 | RALA      | 3.50E-04 | -0.59 |
| ILMN_1748591 | ODC1      | 3.50E-04 | -0.43 |
| ILMN_1658639 | SLC46A3   | 3.51E-04 | -0.56 |
| ILMN_1739985 | TAGAP     | 3.51E-04 | -0.24 |
| ILMN_1677404 | RAP2A     | 3.54E-04 | -0.46 |
| ILMN_1702447 | IGF2BP2   | 3.55E-04 | 0.41  |
| ILMN_1651705 | CAT       | 3.56E-04 | -0.63 |
| ILMN_1811148 | BMP2K     | 3.56E-04 | -0.57 |
| ILMN_1812384 | NR3C1     | 3.62E-04 | -0.33 |
| ILMN_1785071 | SEPP1     | 3.62E-04 | 0.69  |
| ILMN_1777483 | APOOL     | 3.62E-04 | 0.37  |
| ILMN_2347349 | CCNB1IP1  | 3.65E-04 | 0.35  |
| ILMN_2336595 | ACSS2     | 3.67E-04 | -0.50 |
| ILMN_1805148 | C2orf63   | 3.68E-04 | 0.38  |
| ILMN_1680344 | MYOM1     | 3.68E-04 | 0.41  |
| ILMN_2086965 | CCL1      | 3.69E-04 | -0.63 |
| ILMN_2385647 | ALAS1     | 3.71E-04 | -0.34 |
| ILMN_1758672 | FAM107B   | 3.81E-04 | -0.70 |
| ILMN_1719343 | WDR26     | 3.82E-04 | 0.63  |
| ILMN_1657550 | MVD       | 3.86E-04 | -0.26 |
| ILMN_1675085 | UBA6      | 3.86E-04 | -0.50 |
| ILMN_1675130 | NFIC      | 3.86E-04 | 0.54  |
| ILMN_1814194 | TCF4      | 3.86E-04 | -0.52 |
| ILMN_1713088 | MSI2      | 3.86E-04 | 0.37  |
| ILMN_1654065 | ATOH8     | 3.87E-04 | 0.32  |
| ILMN_1724066 | PLCB2     | 3.91E-04 | -0.51 |
| ILMN_3233229 | SNHG7     | 3.98E-04 | 0.45  |
| ILMN_1796712 | S100A10   | 4.05E-04 | 0.50  |
| ILMN_2337941 | COPS8     | 4.07E-04 | 0.93  |
| ILMN_2401641 | ALDH3A2   | 4.08E-04 | -0.46 |
| ILMN_1700955 | TCTEX1D2  | 4.08E-04 | -0.51 |
| ILMN_2152429 | C12orf76  | 4.10E-04 | 0.54  |



|              |              |          |       |
|--------------|--------------|----------|-------|
| ILMN_2128428 | DAB2         | 4.11E-04 | 0.49  |
| ILMN_1798706 | EBI2         | 4.21E-04 | 0.92  |
| ILMN_2049536 | TRPV2        | 4.22E-04 | -0.51 |
| ILMN_1676361 | ARHGAP22     | 4.25E-04 | -0.47 |
| ILMN_1651832 | EHD1         | 4.33E-04 | -0.47 |
| ILMN_1772667 | P2RY1        | 4.33E-04 | 0.27  |
| ILMN_1669832 | TCF12        | 4.33E-04 | 0.44  |
| ILMN_2152131 | ACTB         | 4.35E-04 | -0.53 |
| ILMN_3282983 | LOC100132992 | 4.41E-04 | -0.48 |
| ILMN_2357730 | CCRK         | 4.42E-04 | -0.29 |
| ILMN_2396444 | CD14         | 4.48E-04 | -0.58 |
| ILMN_1738523 | MYD88        | 4.54E-04 | -0.50 |
| ILMN_1695719 | EIF2C2       | 4.54E-04 | 0.51  |
| ILMN_1768553 | LOC283050    | 4.65E-04 | -0.60 |
| ILMN_1786444 | LPL          | 4.65E-04 | 0.61  |
| ILMN_1755411 | RBMS2        | 4.65E-04 | 0.38  |
| ILMN_2400947 | CUGBP2       | 4.69E-04 | 0.32  |
| ILMN_1708534 | PAX8         | 4.69E-04 | 0.40  |
| ILMN_2357134 | SPHK1        | 4.71E-04 | -0.38 |
| ILMN_3235514 | GPR183       | 4.71E-04 | 0.50  |
| ILMN_1788180 | RAB13        | 4.72E-04 | 0.49  |
| ILMN_1737685 | CRLS1        | 4.76E-04 | 0.48  |
| ILMN_2335704 | NCF4         | 4.86E-04 | -0.56 |
| ILMN_1714592 | CDA          | 4.88E-04 | -0.48 |
| ILMN_2371911 | MUC1         | 4.89E-04 | 0.32  |
| ILMN_1699887 | ST14         | 4.91E-04 | 0.53  |
| ILMN_2091792 | ENTPD6       | 4.91E-04 | 0.44  |
| ILMN_1660292 | MRPS21       | 4.91E-04 | 0.42  |
| ILMN_1748983 | RTN4         | 4.99E-04 | 0.27  |
| ILMN_2414533 | ARMCX6       | 5.00E-04 | 0.44  |
| ILMN_2330170 | MYBPC1       | 5.00E-04 | 0.26  |
| ILMN_1695959 | C21orf63     | 5.00E-04 | 0.21  |
| ILMN_2046730 | S100A10      | 5.05E-04 | 0.43  |
| ILMN_1763260 | HIF1A        | 5.08E-04 | -0.62 |
| ILMN_1805512 | WDR13        | 5.09E-04 | 0.45  |
| ILMN_1753111 | NAMPT        | 5.26E-04 | -0.42 |
| ILMN_1812278 | LY9          | 5.26E-04 | -0.40 |
| ILMN_1885771 |              | 5.29E-04 | 0.35  |
| ILMN_1786789 | FAM102B      | 5.35E-04 | -0.39 |
| ILMN_1704961 | ACTG1        | 5.35E-04 | -0.74 |
| ILMN_1775542 | FAIM3        | 5.35E-04 | -0.60 |
| ILMN_2384181 | DHRS9        | 5.42E-04 | -0.47 |
| ILMN_1814230 | MTCP1        | 5.45E-04 | 0.38  |
| ILMN_1733998 | DHRS9        | 5.45E-04 | -0.57 |
| ILMN_1745904 | CCDC6        | 5.46E-04 | 0.48  |
| ILMN_2153332 | ATXN1        | 5.46E-04 | -0.42 |

|              |            |          |       |
|--------------|------------|----------|-------|
| ILMN_1701875 | ZYX        | 5.46E-04 | -0.42 |
| ILMN_1811110 | TDRD9      | 5.54E-04 | 0.52  |
| ILMN_2415421 | SLC30A2    | 5.54E-04 | 0.48  |
| ILMN_1736911 | TMOD1      | 5.56E-04 | 0.41  |
| ILMN_1779257 | CD40       | 5.58E-04 | -0.45 |
| ILMN_2297765 | KCNMA1     | 5.59E-04 | 0.75  |
| ILMN_1772964 | CCL8       | 5.59E-04 | -1.08 |
| ILMN_3210914 | LOC344887  | 5.59E-04 | -0.36 |
| ILMN_2252160 | UBC        | 5.59E-04 | 0.32  |
| ILMN_1760062 | IFI44      | 5.65E-04 | -0.58 |
| ILMN_1694140 | AFAP1L1    | 5.66E-04 | 0.46  |
| ILMN_1796490 | GRINA      | 5.66E-04 | 0.55  |
| ILMN_1708041 | PLEKHF1    | 5.72E-04 | -0.56 |
| ILMN_1752075 | MYBPC1     | 5.72E-04 | 0.30  |
| ILMN_1901198 |            | 5.75E-04 | 0.42  |
| ILMN_1813379 | TNFRSF9    | 5.78E-04 | -0.42 |
| ILMN_1756685 | DEPDC6     | 5.81E-04 | 0.39  |
| ILMN_1767365 | PAK1       | 5.86E-04 | -0.51 |
| ILMN_1756814 | PTPRE      | 5.89E-04 | -0.15 |
| ILMN_1668039 | GYPC       | 5.89E-04 | 0.48  |
| ILMN_1757867 | MTM        | 5.90E-04 | 0.45  |
| ILMN_1677098 | YPEL2      | 6.04E-04 | 0.50  |
| ILMN_1683456 | CCL7       | 6.04E-04 | -0.91 |
| ILMN_1735788 | TRIOBP     | 6.05E-04 | -0.42 |
| ILMN_1654612 | ZNF589     | 6.05E-04 | 0.63  |
| ILMN_1780831 | SLC6A12    | 6.13E-04 | -0.66 |
| ILMN_1764609 | PWWP2B     | 6.15E-04 | 0.32  |
| ILMN_1792495 | AHNAK      | 6.15E-04 | 0.29  |
| ILMN_2094261 | AMY1B      | 6.18E-04 | 0.29  |
| ILMN_1770373 | TMEM39A    | 6.20E-04 | 0.28  |
| ILMN_2343278 | PPAP2A     | 6.24E-04 | -0.28 |
| ILMN_1698307 | DBNL       | 6.24E-04 | -0.42 |
| ILMN_1690621 | GPR98      | 6.35E-04 | 0.21  |
| ILMN_2053178 | ACTG1      | 6.38E-04 | -0.55 |
| ILMN_1909886 |            | 6.39E-04 | 0.53  |
| ILMN_1700518 | HMGN4      | 6.42E-04 | 0.46  |
| ILMN_1747347 | C17orf60   | 6.46E-04 | -0.66 |
| ILMN_1660086 | MYH11      | 6.49E-04 | -0.43 |
| ILMN_1694268 | HES6       | 6.54E-04 | -0.39 |
| ILMN_1685625 | UCP2       | 6.61E-04 | -0.68 |
| ILMN_1682180 | VCPIP1     | 6.66E-04 | 0.39  |
| ILMN_1808919 | HPS4       | 6.68E-04 | 0.36  |
| ILMN_2127379 | ST6GALNAC3 | 6.68E-04 | 0.23  |
| ILMN_1742400 | CEP350     | 6.70E-04 | 0.47  |
| ILMN_1815086 | NINJ1      | 6.81E-04 | -0.46 |
| ILMN_1714082 | CMAS       | 6.84E-04 | 0.49  |

|              |           |          |       |
|--------------|-----------|----------|-------|
| ILMN_2365307 | CD276     | 6.88E-04 | -0.50 |
| ILMN_3309349 | SNHG8     | 6.94E-04 | 0.50  |
| ILMN_3247182 | FAM179A   | 7.00E-04 | 0.55  |
| ILMN_2231928 | MX2       | 7.02E-04 | -0.56 |
| ILMN_1682761 | C17orf87  | 7.02E-04 | -0.41 |
| ILMN_1741431 | AOC2      | 7.02E-04 | 0.23  |
| ILMN_1799062 | NFKB2     | 7.02E-04 | -0.24 |
| ILMN_1757552 | PTRF      | 7.16E-04 | -0.52 |
| ILMN_1658144 | TRIP11    | 7.16E-04 | 0.49  |
| ILMN_2369953 | ARL4A     | 7.24E-04 | 0.30  |
| ILMN_1698406 | ORMDL1    | 7.32E-04 | 0.50  |
| ILMN_2366634 | PKM2      | 7.32E-04 | -0.46 |
| ILMN_3216794 | LOC644860 | 7.32E-04 | 0.30  |
| ILMN_1784756 | ACOT7     | 7.32E-04 | -0.39 |
| ILMN_2399769 | GPR177    | 7.33E-04 | 0.39  |
| ILMN_1803739 | RPGRIP1   | 7.37E-04 | -0.28 |
| ILMN_1726545 | LILRA5    | 7.37E-04 | -0.31 |
| ILMN_2299045 | BMP2K     | 7.40E-04 | -0.52 |
| ILMN_2109197 | EPB41L3   | 7.40E-04 | -0.59 |
| ILMN_1662358 | MX1       | 7.46E-04 | -0.50 |
| ILMN_1912287 |           | 7.46E-04 | -0.63 |
| ILMN_1732151 | COL6A1    | 7.46E-04 | -0.40 |
| ILMN_3249654 | UOX       | 7.49E-04 | 0.16  |
| ILMN_2362346 | TRPV4     | 7.52E-04 | -0.20 |
| ILMN_1713529 | SEMA6A    | 7.53E-04 | 0.28  |
| ILMN_1708159 | PRKCABP   | 7.53E-04 | 0.37  |
| ILMN_2052373 | RAB17     | 7.53E-04 | -0.31 |
| ILMN_1658926 | NOTCH3    | 7.55E-04 | 0.50  |
| ILMN_2371169 | ZYX       | 7.59E-04 | -0.45 |
| ILMN_1746148 | LRRC33    | 7.59E-04 | -0.43 |
| ILMN_1752159 | AHNAK     | 7.65E-04 | 0.40  |
| ILMN_1738047 | C10orf73  | 7.66E-04 | 0.23  |
| ILMN_1690268 | HNRPUL1   | 7.72E-04 | 0.46  |
| ILMN_1765801 | GAA       | 7.72E-04 | 0.46  |
| ILMN_2041101 | ANXA2P1   | 7.72E-04 | -0.41 |
| ILMN_1664233 | LOC644590 | 7.73E-04 | -0.31 |
| ILMN_1723971 | SLC29A1   | 7.75E-04 | 0.46  |
| ILMN_1746819 | C5        | 7.75E-04 | 0.39  |
| ILMN_1674926 | C19orf35  | 7.75E-04 | 0.18  |
| ILMN_1695829 | TTYH2     | 7.77E-04 | -0.35 |
| ILMN_1792363 | KLK4      | 7.87E-04 | -0.86 |
| ILMN_1660462 | MCOLN2    | 7.89E-04 | -0.48 |
| ILMN_1682799 | STAMBPL1  | 7.95E-04 | -0.21 |
| ILMN_1800078 | LMO2      | 7.96E-04 | -0.47 |
| ILMN_1768469 | TCN1      | 8.03E-04 | 0.23  |
| ILMN_1672940 | ZNF562    | 8.03E-04 | 0.37  |

|              |           |          |       |
|--------------|-----------|----------|-------|
| ILMN_1778242 | CALM1     | 8.03E-04 | -0.57 |
| ILMN_1745964 | IRAK2     | 8.03E-04 | -0.37 |
| ILMN_1859584 |           | 8.04E-04 | 0.43  |
| ILMN_1785170 | ARMCX2    | 8.05E-04 | 0.54  |
| ILMN_1698313 | CPM       | 8.05E-04 | 0.36  |
| ILMN_1772876 | ZNF395    | 8.09E-04 | 0.47  |
| ILMN_1890614 |           | 8.13E-04 | 0.38  |
| ILMN_3281195 | LOC440459 | 8.20E-04 | 0.26  |
| ILMN_1769013 | ASGR1     | 8.22E-04 | -0.62 |
| ILMN_1813350 | HSD11B2   | 8.27E-04 | 0.20  |
| ILMN_3237376 | GRAMD1B   | 8.43E-04 | 0.34  |
| ILMN_1810559 | RHOQ      | 8.48E-04 | 0.53  |
| ILMN_1695745 | DISP1     | 8.51E-04 | 0.43  |
| ILMN_1698100 | ANXA2P1   | 8.51E-04 | -0.56 |
| ILMN_2386179 | ZMYND8    | 8.51E-04 | 0.31  |
| ILMN_1750101 | S100A11   | 8.51E-04 | -0.44 |
| ILMN_1808405 | HLA-DQA1  | 8.58E-04 | -0.55 |
| ILMN_1815719 | PLCG2     | 8.62E-04 | -0.52 |
| ILMN_1805807 | SLC30A3   | 8.62E-04 | -0.95 |
| ILMN_1721626 | ARID5B    | 8.63E-04 | 0.56  |
| ILMN_1776181 | BIRC3     | 8.63E-04 | -0.58 |
| ILMN_1766657 | STOM      | 8.71E-04 | 0.61  |
| ILMN_1714083 | KLHL8     | 8.72E-04 | 0.38  |
| ILMN_2112988 | NCF1C     | 8.76E-04 | 0.53  |
| ILMN_1709795 | RAC2      | 8.82E-04 | -0.47 |
| ILMN_1783852 | CD164     | 8.89E-04 | 0.48  |
| ILMN_1787186 | NOV       | 8.93E-04 | 0.60  |
| ILMN_3237446 | SCARNA16  | 8.99E-04 | 0.28  |
| ILMN_1699574 | NRP1      | 8.99E-04 | -0.55 |
| ILMN_2081883 | IQCK      | 9.00E-04 | -0.34 |
| ILMN_1657153 | ACTR3     | 9.00E-04 | -0.47 |
| ILMN_1707240 | PTBP2     | 9.03E-04 | 0.37  |
| ILMN_1835017 |           | 9.03E-04 | 0.48  |
| ILMN_1758323 | ACPP      | 9.04E-04 | -0.25 |
| ILMN_1791771 | HCK       | 9.06E-04 | -0.47 |
| ILMN_1793950 | P704P     | 9.07E-04 | -0.32 |
| ILMN_1712719 | MAP7      | 9.14E-04 | -0.45 |
| ILMN_1807825 | LY86      | 9.15E-04 | -0.49 |
| ILMN_1801616 | EMP1      | 9.15E-04 | 0.53  |
| ILMN_1807106 | LDHA      | 9.21E-04 | 0.59  |
| ILMN_1789001 | SLC35B2   | 9.25E-04 | 0.38  |
| ILMN_2099528 | BTLA      | 9.30E-04 | 0.27  |
| ILMN_1719627 | SLC27A3   | 9.31E-04 | 0.43  |
| ILMN_1791575 | HNRPLL    | 9.31E-04 | -0.34 |
| ILMN_2165473 | MID1IP1   | 9.50E-04 | -0.46 |
| ILMN_1653496 | GLUL      | 9.56E-04 | 0.43  |

|              |              |          |       |
|--------------|--------------|----------|-------|
| ILMN_1788547 | GCLM         | 9.56E-04 | -0.40 |
| ILMN_1791328 | STK39        | 9.58E-04 | -0.46 |
| ILMN_1795342 | MLPH         | 9.62E-04 | 0.52  |
| ILMN_1776998 | DNAJA4       | 9.70E-04 | -0.42 |
| ILMN_1754076 | CACNA2D3     | 9.72E-04 | -0.68 |
| ILMN_2077905 | PTGFRN       | 9.72E-04 | -0.23 |
| ILMN_1803256 | STOX2        | 9.80E-04 | -0.46 |
| ILMN_2054607 | CYP4V2       | 9.87E-04 | -0.43 |
| ILMN_1775327 | PKM2         | 9.87E-04 | -0.46 |
| ILMN_1695731 | TUBG1        | 9.90E-04 | -0.46 |
| ILMN_1754158 | C6orf185     | 1.00E-03 | 0.26  |
| ILMN_3176790 | LOC100128269 | 1.01E-03 | 0.35  |
| ILMN_1751963 | ZCWPW1       | 1.02E-03 | 0.44  |
| ILMN_1783956 | ATP8B4       | 1.02E-03 | -0.54 |
| ILMN_1776115 | GSDMA        | 1.02E-03 | 0.32  |
| ILMN_1656910 | TRIM6        | 1.03E-03 | -0.35 |
| ILMN_1677607 | SC5DL        | 1.03E-03 | -0.44 |
| ILMN_3239445 | ZBTB42       | 1.03E-03 | -0.32 |
| ILMN_1815626 | DHCR7        | 1.03E-03 | -0.34 |
| ILMN_1660533 | RPN1         | 1.03E-03 | 0.49  |
| ILMN_1664691 | DAPP1        | 1.03E-03 | -0.32 |
| ILMN_1763461 | ALDH7A1      | 1.04E-03 | 0.55  |
| ILMN_1671969 | UGP2         | 1.04E-03 | 0.75  |
| ILMN_1754660 | ZCCHC24      | 1.04E-03 | -0.32 |
| ILMN_1796508 | TOP1MT       | 1.04E-03 | -0.34 |
| ILMN_2339294 | LILRB5       | 1.04E-03 | -0.81 |
| ILMN_1691104 | PGAM4        | 1.04E-03 | -0.48 |
| ILMN_1708303 | CYP4F22      | 1.05E-03 | 0.48  |
| ILMN_2349610 | DPH3         | 1.05E-03 | 0.50  |
| ILMN_1660549 | GPR177       | 1.05E-03 | 0.41  |
| ILMN_1745374 | IFI35        | 1.06E-03 | -0.47 |
| ILMN_2172755 | DEPDC6       | 1.06E-03 | 0.25  |
| ILMN_2405018 | PPP1CB       | 1.06E-03 | -0.35 |
| ILMN_1811624 | THADA        | 1.07E-03 | 0.45  |
| ILMN_1727466 | KCNMB4       | 1.07E-03 | -0.36 |
| ILMN_2395214 | FMNL3        | 1.07E-03 | -0.26 |
| ILMN_1682332 | GYPC         | 1.08E-03 | 0.51  |
| ILMN_2316236 | HOPX         | 1.08E-03 | 0.55  |
| ILMN_1789510 | STIP1        | 1.09E-03 | -0.55 |
| ILMN_1766814 | TK2          | 1.09E-03 | 0.33  |
| ILMN_1814106 | C9orf169     | 1.09E-03 | 0.29  |
| ILMN_1672650 | PKM2         | 1.09E-03 | -0.41 |
| ILMN_1674696 | OLAH         | 1.10E-03 | 0.22  |
| ILMN_2317923 | TMEM132A     | 1.12E-03 | -0.23 |
| ILMN_1800739 | SPINT2       | 1.12E-03 | -0.49 |
| ILMN_1785356 | DENND5A      | 1.12E-03 | -0.43 |

|              |          |          |       |
|--------------|----------|----------|-------|
| ILMN_1790807 | XPC      | 1.13E-03 | 0.49  |
| ILMN_1764321 | ACOT4    | 1.13E-03 | -0.44 |
| ILMN_1723874 | MRPS6    | 1.13E-03 | -0.50 |
| ILMN_1750429 | MKNK1    | 1.13E-03 | -0.39 |
| ILMN_1768284 | P2RY8    | 1.13E-03 | 0.42  |
| ILMN_2357419 | LILRA5   | 1.14E-03 | -0.47 |
| ILMN_1787897 | CXCL1    | 1.15E-03 | -0.46 |
| ILMN_2365248 | HVCN1    | 1.15E-03 | -0.38 |
| ILMN_1808508 | KITLG    | 1.16E-03 | -0.47 |
| ILMN_1671260 | GPR177   | 1.16E-03 | 0.44  |
| ILMN_2367070 | ACOT9    | 1.16E-03 | -0.51 |
| ILMN_1797372 | C3orf58  | 1.16E-03 | 0.37  |
| ILMN_3194087 | HSPC157  | 1.16E-03 | 0.32  |
| ILMN_2406035 | LAMA3    | 1.17E-03 | 0.17  |
| ILMN_1660364 | PSCD4    | 1.17E-03 | -0.46 |
| ILMN_1703374 | NAV1     | 1.17E-03 | 0.25  |
| ILMN_1760201 | DNMT1    | 1.17E-03 | -0.48 |
| ILMN_1729170 | GPA33    | 1.17E-03 | 0.29  |
| ILMN_3248882 | KIAA0114 | 1.17E-03 | 0.25  |
| ILMN_1657810 | PPM1M    | 1.17E-03 | -0.47 |
| ILMN_2062620 | NMT2     | 1.18E-03 | -0.24 |
| ILMN_1729374 | ETFB     | 1.18E-03 | 0.47  |
| ILMN_2143795 | MGC4677  | 1.18E-03 | -0.44 |
| ILMN_1712075 | SYNM     | 1.18E-03 | 0.44  |
| ILMN_2216815 | MAP7     | 1.18E-03 | -0.38 |
| ILMN_2119774 | CYP2R1   | 1.18E-03 | 0.37  |
| ILMN_3241758 | POTEF    | 1.19E-03 | -0.59 |
| ILMN_1784300 | TUBA4A   | 1.20E-03 | -0.46 |
| ILMN_1752579 | ATP6V0A1 | 1.20E-03 | -0.40 |
| ILMN_1781952 | MGST1    | 1.21E-03 | 0.52  |
| ILMN_1767816 | APH1B    | 1.21E-03 | 0.44  |
| ILMN_1903568 |          | 1.21E-03 | -0.47 |
| ILMN_1764380 | GLTP     | 1.23E-03 | -0.48 |
| ILMN_2311537 | HMGA1    | 1.23E-03 | -0.41 |
| ILMN_1719988 | HAL      | 1.25E-03 | 0.15  |
| ILMN_3237632 | NCLN     | 1.25E-03 | -0.39 |
| ILMN_1769383 | GIMAP5   | 1.26E-03 | 0.50  |
| ILMN_1804955 | CTSF     | 1.28E-03 | 0.32  |
| ILMN_1727315 | DENND1A  | 1.29E-03 | -0.28 |
| ILMN_1810093 | TSPAN2   | 1.30E-03 | 0.12  |
| ILMN_1682636 | CXCL2    | 1.30E-03 | -0.49 |
| ILMN_1735157 | GALNT12  | 1.30E-03 | -0.43 |
| ILMN_1793384 | JAK1     | 1.30E-03 | 0.43  |
| ILMN_1724897 | C14orf93 | 1.31E-03 | 0.34  |
| ILMN_1764228 | DAB2     | 1.31E-03 | 0.41  |
| ILMN_1687612 | PPARG    | 1.32E-03 | 0.29  |

|              |           |          |       |
|--------------|-----------|----------|-------|
| ILMN_2387680 | VNN3      | 1.33E-03 | 0.21  |
| ILMN_1686989 | INSIG1    | 1.33E-03 | -0.35 |
| ILMN_1658628 | C14orf72  | 1.33E-03 | 0.20  |
| ILMN_1821176 |           | 1.33E-03 | -0.58 |
| ILMN_1756049 | NT5DC3    | 1.33E-03 | 0.28  |
| ILMN_2241775 | TROVE2    | 1.33E-03 | -0.38 |
| ILMN_2219683 | NEU4      | 1.36E-03 | 0.31  |
| ILMN_3245869 | LOC440957 | 1.38E-03 | 0.52  |
| ILMN_1656129 | SLC39A10  | 1.39E-03 | -0.21 |
| ILMN_1763828 | MTF1      | 1.39E-03 | -0.42 |
| ILMN_1672547 | MYO9B     | 1.39E-03 | -0.39 |
| ILMN_1758049 | NFIA      | 1.39E-03 | 0.30  |
| ILMN_2359287 | ITGA6     | 1.40E-03 | -0.28 |
| ILMN_2373495 | H2AFY     | 1.41E-03 | 0.38  |
| ILMN_2080637 | ZBTB44    | 1.41E-03 | 0.34  |
| ILMN_1719224 | C17orf45  | 1.42E-03 | 0.51  |
| ILMN_1672807 | CA5B      | 1.43E-03 | 0.24  |
| ILMN_2075927 | STK40     | 1.43E-03 | -0.44 |
| ILMN_1709820 | AOAH      | 1.43E-03 | -0.37 |
| ILMN_2073202 | MEI1      | 1.44E-03 | -0.32 |
| ILMN_2038777 | ACTB      | 1.46E-03 | -0.57 |
| ILMN_1736510 | FOXN2     | 1.46E-03 | 0.55  |
| ILMN_1749327 | MAPK13    | 1.48E-03 | -0.49 |
| ILMN_1715715 | CEBPA     | 1.49E-03 | -0.40 |
| ILMN_2095759 | OGFRL1    | 1.49E-03 | 0.45  |
| ILMN_1758315 | SLC9A9    | 1.49E-03 | -0.35 |
| ILMN_1686981 | SULF2     | 1.49E-03 | -0.21 |
| ILMN_3248379 | LOC727758 | 1.51E-03 | 0.37  |
| ILMN_1740685 | LOC652541 | 1.51E-03 | 0.35  |
| ILMN_1673478 | C5orf5    | 1.52E-03 | -0.49 |
| ILMN_1756784 | FREQ      | 1.52E-03 | -0.33 |
| ILMN_1752520 | SLFN11    | 1.53E-03 | 0.51  |
| ILMN_2409384 | SIGLEC7   | 1.53E-03 | -0.28 |
| ILMN_1659984 | MEP1A     | 1.53E-03 | -0.48 |
| ILMN_2115005 | FGD2      | 1.54E-03 | 0.79  |
| ILMN_1652185 | IL4R      | 1.55E-03 | -0.42 |
| ILMN_1787127 | SLC43A2   | 1.56E-03 | -0.47 |
| ILMN_2167011 | ECHDC1    | 1.56E-03 | 0.38  |
| ILMN_2196078 | SLAMF6    | 1.58E-03 | -0.70 |
| ILMN_1755937 | ANXA2     | 1.61E-03 | -0.36 |
| ILMN_2143250 | FAR1      | 1.62E-03 | -0.37 |
| ILMN_2338997 | PTP4A2    | 1.63E-03 | -0.44 |
| ILMN_1670322 | FCHO2     | 1.64E-03 | 0.47  |
| ILMN_2345898 | SLA       | 1.64E-03 | 0.58  |
| ILMN_2129161 | LRRC32    | 1.64E-03 | -0.16 |
| ILMN_1654118 | BCL2L1    | 1.64E-03 | 0.46  |

|              |           |          |       |
|--------------|-----------|----------|-------|
| ILMN_1674343 | NXF3      | 1.64E-03 | -0.26 |
| ILMN_1706635 | ELANE     | 1.66E-03 | 0.15  |
| ILMN_1801710 | APBB1IP   | 1.66E-03 | 0.45  |
| ILMN_1698728 | FGD4      | 1.67E-03 | 0.34  |
| ILMN_1688098 | TBC1D4    | 1.67E-03 | -0.30 |
| ILMN_1756701 | DHRS11    | 1.68E-03 | -0.60 |
| ILMN_2084073 | UCN       | 1.69E-03 | 0.47  |
| ILMN_1769433 | IQGAP2    | 1.69E-03 | 0.40  |
| ILMN_2291954 | SLA       | 1.70E-03 | 0.59  |
| ILMN_1717207 | MMP25     | 1.70E-03 | -0.52 |
| ILMN_1674050 | COL8A2    | 1.70E-03 | -0.36 |
| ILMN_2160388 | RPL24     | 1.71E-03 | 0.36  |
| ILMN_1807894 | SLC7A8    | 1.71E-03 | 0.42  |
| ILMN_1809352 | PRL       | 1.73E-03 | 0.19  |
| ILMN_2358202 | ARS2      | 1.73E-03 | -0.43 |
| ILMN_1653432 | HNRPDL    | 1.73E-03 | 0.29  |
| ILMN_1748915 | S100A12   | 1.74E-03 | -0.22 |
| ILMN_1778723 | AMICA1    | 1.74E-03 | -0.54 |
| ILMN_1752562 | CXCL5     | 1.74E-03 | -0.46 |
| ILMN_1742521 | GRB2      | 1.74E-03 | -0.35 |
| ILMN_1750373 | KAL1      | 1.74E-03 | -0.29 |
| ILMN_1679912 | DPH3      | 1.75E-03 | 0.45  |
| ILMN_1739428 | IFIT2     | 1.77E-03 | -0.62 |
| ILMN_2144088 | FDFT1     | 1.77E-03 | -0.43 |
| ILMN_1728478 | CXCL16    | 1.77E-03 | -0.38 |
| ILMN_1708805 | NCOA3     | 1.77E-03 | 0.42  |
| ILMN_1795227 | DNCL1     | 1.77E-03 | -0.36 |
| ILMN_1768719 | RDH11     | 1.79E-03 | -0.49 |
| ILMN_1693431 | C13orf31  | 1.79E-03 | -0.34 |
| ILMN_1715927 | VSTM2L    | 1.79E-03 | 0.15  |
| ILMN_1731433 | ABP1      | 1.79E-03 | -0.73 |
| ILMN_2401933 | ATP2B1    | 1.80E-03 | -0.25 |
| ILMN_1713846 | PPM1H     | 1.80E-03 | -0.36 |
| ILMN_2060770 | RAI1      | 1.81E-03 | -0.25 |
| ILMN_1717094 | ZNF618    | 1.81E-03 | -0.22 |
| ILMN_3201115 | LOC440043 | 1.82E-03 | -0.42 |
| ILMN_1658709 | LAMB1     | 1.82E-03 | 0.46  |
| ILMN_1715273 | PICALM    | 1.82E-03 | -0.45 |
| ILMN_1867119 |           | 1.83E-03 | -0.54 |
| ILMN_2410783 | GAA       | 1.83E-03 | 0.39  |
| ILMN_2314007 | TCF12     | 1.84E-03 | 0.45  |
| ILMN_1712929 | DNAJB12   | 1.84E-03 | -0.34 |
| ILMN_1803560 | LAT2      | 1.86E-03 | -0.42 |
| ILMN_1755024 | IKBKE     | 1.87E-03 | -0.39 |
| ILMN_2125374 | CMAS      | 1.88E-03 | 0.49  |
| ILMN_1741727 | QPCT      | 1.91E-03 | -0.43 |



|              |               |          |       |
|--------------|---------------|----------|-------|
| ILMN_1651433 | DCK           | 1.91E-03 | 0.46  |
| ILMN_1704750 | LOC647000     | 1.91E-03 | -0.40 |
| ILMN_1741957 | RABEPK        | 1.91E-03 | -0.39 |
| ILMN_1812759 | GCH1          | 1.91E-03 | -0.37 |
| ILMN_1679267 | TGM2          | 1.92E-03 | -0.25 |
| ILMN_1653466 | HES4          | 1.92E-03 | -0.35 |
| ILMN_1698715 | NHLRC2        | 1.93E-03 | 0.40  |
| ILMN_1776327 | LOC727820     | 1.94E-03 | 0.27  |
| ILMN_1793433 | RAB10         | 1.94E-03 | -0.44 |
| ILMN_2383163 | DEPDC7        | 1.95E-03 | -0.17 |
| ILMN_1758418 | TNFSF13B      | 1.95E-03 | -0.48 |
| ILMN_3237209 | LOC642661     | 1.97E-03 | 0.19  |
| ILMN_1667371 | SLA           | 1.98E-03 | 0.58  |
| ILMN_1657111 | C14orf78      | 1.98E-03 | 0.31  |
| ILMN_1710962 | TMEM97        | 1.98E-03 | -0.45 |
| ILMN_1799598 | SIRT5         | 1.99E-03 | 0.27  |
| ILMN_1700690 | VAT1          | 1.99E-03 | 0.40  |
| ILMN_2372413 | BID           | 2.00E-03 | -0.40 |
| ILMN_1756849 | HIST1H2AE     | 2.00E-03 | 0.26  |
| ILMN_1775257 | PROK2         | 2.00E-03 | -0.15 |
| ILMN_2358069 | MAD1L1        | 2.01E-03 | 0.34  |
| ILMN_2392189 | CTDSPL        | 2.01E-03 | -0.37 |
| ILMN_1685824 | B4GALT5       | 2.04E-03 | -0.49 |
| ILMN_1679838 | WBP5          | 2.04E-03 | -0.36 |
| ILMN_1708728 | H2AFJ         | 2.04E-03 | 0.40  |
| ILMN_1672496 | DNAJA1        | 2.05E-03 | -0.46 |
| ILMN_2047112 | RP11-529I10.4 | 2.06E-03 | -0.17 |
| ILMN_1764090 | AK3L1         | 2.08E-03 | -0.50 |
| ILMN_1774823 | RPL34         | 2.09E-03 | 0.35  |
| ILMN_1761247 | PIR           | 2.10E-03 | -0.34 |
| ILMN_1773073 | PHYH          | 2.10E-03 | 0.43  |
| ILMN_1785424 | ABLIM1        | 2.11E-03 | -0.20 |
| ILMN_1714148 | C9orf90       | 2.11E-03 | 0.35  |
| ILMN_1910180 |               | 2.11E-03 | -0.42 |
| ILMN_1724789 | CD59          | 2.12E-03 | 0.39  |
| ILMN_1701413 | PIGQ          | 2.12E-03 | -0.38 |
| ILMN_3230300 | LOC729143     | 2.12E-03 | 0.23  |
| ILMN_1679797 | ADARB1        | 2.12E-03 | -0.38 |
| ILMN_1684629 | C20orf26      | 2.12E-03 | -0.21 |
| ILMN_1780861 | LOC653506     | 2.14E-03 | -0.53 |
| ILMN_1682953 | PGAM4         | 2.14E-03 | -0.37 |
| ILMN_1731644 | SETDB2        | 2.14E-03 | 0.46  |
| ILMN_1758400 | GRIN3A        | 2.16E-03 | -0.24 |
| ILMN_3299520 | PRKCB         | 2.17E-03 | -0.32 |
| ILMN_1723843 | CSNK2A2       | 2.18E-03 | 0.35  |
| ILMN_1772521 | MTHFD1L       | 2.18E-03 | -0.30 |

|              |            |          |       |
|--------------|------------|----------|-------|
| ILMN_1704014 | LOC730256  | 2.18E-03 | 0.38  |
| ILMN_1751898 | C12orf4    | 2.18E-03 | -0.36 |
| ILMN_1654289 | ELK1       | 2.18E-03 | 0.45  |
| ILMN_1776778 | PARP15     | 2.20E-03 | 0.21  |
| ILMN_1733453 | LOC284988  | 2.20E-03 | 0.42  |
| ILMN_1740169 | TYRO3      | 2.20E-03 | 0.13  |
| ILMN_1731048 | TLR1       | 2.20E-03 | -0.37 |
| ILMN_1683215 | ZBED3      | 2.20E-03 | 0.27  |
| ILMN_1679438 | MLF1IP     | 2.20E-03 | 0.13  |
| ILMN_1725675 | ABCC6      | 2.21E-03 | -0.17 |
| ILMN_2352077 | KL         | 2.21E-03 | -0.31 |
| ILMN_1765146 | IFNAR2     | 2.21E-03 | -0.43 |
| ILMN_1847047 |            | 2.21E-03 | -0.31 |
| ILMN_1778536 | BTLA       | 2.21E-03 | 0.17  |
| ILMN_1781155 | LYN        | 2.21E-03 | -0.40 |
| ILMN_1652906 | GBGT1      | 2.21E-03 | 0.44  |
| ILMN_1700507 | CLASP1     | 2.21E-03 | 0.38  |
| ILMN_3236945 | PTPMT1     | 2.21E-03 | -0.51 |
| ILMN_1836776 |            | 2.22E-03 | 0.23  |
| ILMN_1678143 | ARHGDIB    | 2.22E-03 | -0.36 |
| ILMN_1694596 | FAR2       | 2.22E-03 | 0.24  |
| ILMN_1741021 | CH25H      | 2.22E-03 | 0.31  |
| ILMN_1727813 | BRP44      | 2.22E-03 | -0.46 |
| ILMN_2077680 | CLDND2     | 2.22E-03 | 0.28  |
| ILMN_1693004 | C20orf117  | 2.23E-03 | -0.28 |
| ILMN_2115434 | RAB32      | 2.27E-03 | -0.46 |
| ILMN_1798372 | ANXA2P3    | 2.30E-03 | -0.35 |
| ILMN_1772218 | HLA-DPA1   | 2.30E-03 | -0.48 |
| ILMN_1767934 | PCSK5      | 2.31E-03 | -0.34 |
| ILMN_1736796 | RB1CC1     | 2.31E-03 | 0.37  |
| ILMN_1701195 | PLA2G7     | 2.31E-03 | -0.44 |
| ILMN_1772387 | TLR2       | 2.32E-03 | 0.27  |
| ILMN_1672759 | CCDC109A   | 2.34E-03 | -0.37 |
| ILMN_2320888 | CXCR4      | 2.34E-03 | 0.45  |
| ILMN_1815169 | MCM5       | 2.34E-03 | -0.30 |
| ILMN_1738220 | TREML3     | 2.36E-03 | -0.39 |
| ILMN_1810628 | KIAA0367   | 2.37E-03 | -0.44 |
| ILMN_1653711 | FZD2       | 2.40E-03 | 0.38  |
| ILMN_1796734 | SPARC      | 2.41E-03 | -0.37 |
| ILMN_1806908 | PRKCB1     | 2.42E-03 | -0.51 |
| ILMN_1701621 | SCO2       | 2.43E-03 | -0.41 |
| ILMN_2055523 | CSGALNACT1 | 2.43E-03 | 0.22  |
| ILMN_2382829 | PRDX2      | 2.43E-03 | 0.27  |
| ILMN_1727194 | CALU       | 2.44E-03 | 0.40  |
| ILMN_1652123 | HMG1       | 2.44E-03 | -0.42 |
| ILMN_1747622 | CD33       | 2.45E-03 | 0.38  |

|              |              |          |       |
|--------------|--------------|----------|-------|
| ILMN_1730639 | SLC22A15     | 2.47E-03 | 0.36  |
| ILMN_1810199 | ASRGL1       | 2.47E-03 | -0.24 |
| ILMN_3235358 | LOC100133080 | 2.49E-03 | 0.23  |
| ILMN_1766359 | GATAD2B      | 2.49E-03 | 0.22  |
| ILMN_1888558 |              | 2.50E-03 | 0.42  |
| ILMN_1803824 | ZDHHC9       | 2.50E-03 | 0.48  |
| ILMN_1676844 | NR1D2        | 2.50E-03 | -0.26 |
| ILMN_1675797 | EPDR1        | 2.50E-03 | 0.45  |
| ILMN_1789233 | VPS37C       | 2.52E-03 | -0.35 |
| ILMN_1699772 | RRAGD        | 2.52E-03 | 0.40  |
| ILMN_1666615 | PREPL        | 2.52E-03 | -0.25 |
| ILMN_2204876 | FLVCR2       | 2.52E-03 | 0.44  |
| ILMN_1651800 | GSTM4        | 2.53E-03 | -0.28 |
| ILMN_1773363 | CIITA        | 2.54E-03 | -0.37 |
| ILMN_1702609 | B3GNT5       | 2.54E-03 | 0.17  |
| ILMN_2094952 | NUAK2        | 2.55E-03 | -0.22 |
| ILMN_2056975 | HPRT1        | 2.55E-03 | -0.39 |
| ILMN_1857295 |              | 2.55E-03 | 0.29  |
| ILMN_1906187 |              | 2.56E-03 | 0.31  |
| ILMN_2373779 | COPS8        | 2.56E-03 | 0.66  |
| ILMN_2404512 | PSEN2        | 2.57E-03 | -0.34 |
| ILMN_1741881 | C9orf72      | 2.57E-03 | -0.38 |
| ILMN_3248591 | LTBP2        | 2.57E-03 | -0.33 |
| ILMN_1812503 | PHKA1        | 2.57E-03 | 0.32  |
| ILMN_2140990 | CAMK1        | 2.57E-03 | -0.39 |
| ILMN_1785330 | SH3BP4       | 2.57E-03 | 0.27  |
| ILMN_1739103 | MPZL1        | 2.58E-03 | -0.31 |
| ILMN_1785732 | TNFAIP6      | 2.61E-03 | -0.63 |
| ILMN_1691508 | PLAUR        | 2.63E-03 | -0.48 |
| ILMN_1706413 | C1orf66      | 2.65E-03 | 0.29  |
| ILMN_1670672 | TMEM37       | 2.65E-03 | 0.37  |
| ILMN_1808391 | DUSP4        | 2.65E-03 | 0.14  |
| ILMN_1736939 | UGCG         | 2.66E-03 | -0.38 |
| ILMN_3217815 | LOC646294    | 2.66E-03 | 0.37  |
| ILMN_1653001 | CABLES1      | 2.66E-03 | -0.30 |
| ILMN_1752923 | IFNAR1       | 2.66E-03 | -0.38 |
| ILMN_1756501 | ST6GAL1      | 2.66E-03 | -0.41 |
| ILMN_1789074 | HSPA1A       | 2.67E-03 | -0.40 |
| ILMN_1777233 | E2F2         | 2.67E-03 | -0.23 |
| ILMN_2367818 | CD40         | 2.67E-03 | -0.28 |
| ILMN_3263694 | LOC100128771 | 2.68E-03 | 0.27  |
| ILMN_1782247 | KAT2A        | 2.68E-03 | 0.33  |
| ILMN_1766363 | FLT3         | 2.68E-03 | 0.14  |
| ILMN_1722276 | PAFAH1B1     | 2.68E-03 | -0.39 |
| ILMN_2401618 | MLX          | 2.68E-03 | 0.31  |
| ILMN_1764396 | HDAC4        | 2.68E-03 | 0.29  |

|              |              |          |       |
|--------------|--------------|----------|-------|
| ILMN_3242540 | CD163L1      | 2.68E-03 | 0.21  |
| ILMN_1808956 | C15orf27     | 2.69E-03 | -0.48 |
| ILMN_2395856 | TMEM218      | 2.70E-03 | 0.40  |
| ILMN_3246065 | CCDC151      | 2.70E-03 | 0.27  |
| ILMN_1811616 | EEPDP1       | 2.71E-03 | -0.25 |
| ILMN_1689842 | SC4MOL       | 2.71E-03 | -0.40 |
| ILMN_1720623 | SYTL3        | 2.73E-03 | 0.41  |
| ILMN_1814737 | LNPEP        | 2.74E-03 | -0.40 |
| ILMN_1764362 | LYAR         | 2.75E-03 | 0.33  |
| ILMN_1808404 | RHBDF1       | 2.75E-03 | -0.61 |
| ILMN_1768449 | PRPSAP1      | 2.76E-03 | -0.40 |
| ILMN_1742547 | NRP1         | 2.78E-03 | -0.34 |
| ILMN_2075189 | SLC35F2      | 2.79E-03 | -0.26 |
| ILMN_1688775 | METRNL       | 2.80E-03 | -0.57 |
| ILMN_1874323 |              | 2.81E-03 | 0.17  |
| ILMN_1700847 | PMS1         | 2.82E-03 | 0.17  |
| ILMN_1671442 | WDR43        | 2.86E-03 | 0.28  |
| ILMN_3244014 | LOC100131967 | 2.86E-03 | -0.21 |
| ILMN_2347949 | G6PD         | 2.87E-03 | -0.36 |
| ILMN_1717262 | PROCR        | 2.87E-03 | -0.39 |
| ILMN_1656045 | BRUNOL6      | 2.87E-03 | 0.39  |
| ILMN_2102330 | COL8A2       | 2.89E-03 | -0.36 |
| ILMN_1655930 | ELL2         | 2.89E-03 | 0.42  |
| ILMN_1664167 | RPF2         | 2.91E-03 | 0.36  |
| ILMN_1667199 | SQRDL        | 2.93E-03 | -0.45 |
| ILMN_1746465 | FJX1         | 2.95E-03 | 0.33  |
| ILMN_1661194 | CLDN14       | 2.95E-03 | -0.32 |
| ILMN_1718295 | STAC2        | 2.95E-03 | 0.21  |
| ILMN_1666819 | PHLDB1       | 2.98E-03 | -0.34 |
| ILMN_1743755 | LOC441150    | 2.98E-03 | 0.20  |
| ILMN_3308310 | RNU86        | 2.98E-03 | 0.20  |
| ILMN_2373831 | BTN3A3       | 2.99E-03 | 0.30  |
| ILMN_1655796 | 42066        | 3.06E-03 | -0.27 |
| ILMN_1759563 | NRIP3        | 3.07E-03 | -0.50 |
| ILMN_1689655 | HLA-DRA      | 3.08E-03 | -0.41 |
| ILMN_1763452 | EVI2B        | 3.08E-03 | 0.39  |
| ILMN_1807919 | TNS1         | 3.08E-03 | 0.34  |
| ILMN_1810864 | PMP22        | 3.11E-03 | 0.37  |
| ILMN_2215640 | TUBA3D       | 3.12E-03 | -0.34 |
| ILMN_1784985 | PRRT3        | 3.12E-03 | -0.29 |
| ILMN_1676213 | SRPX2        | 3.13E-03 | -0.29 |
| ILMN_1711799 | C9orf40      | 3.14E-03 | 0.20  |
| ILMN_1756590 | SYS1         | 3.16E-03 | 0.36  |
| ILMN_2072296 | CKS2         | 3.16E-03 | 0.39  |
| ILMN_1766637 | GLA          | 3.19E-03 | -0.41 |
| ILMN_1654571 | FCHO1        | 3.19E-03 | -0.17 |

|              |           |          |       |
|--------------|-----------|----------|-------|
| ILMN_2098616 | C5orf39   | 3.21E-03 | 0.26  |
| ILMN_1775501 | IL1B      | 3.21E-03 | -0.98 |
| ILMN_1768558 | LOC727848 | 3.23E-03 | -0.16 |
| ILMN_2112417 | PGAM1     | 3.25E-03 | -0.44 |
| ILMN_1795715 | DPYD      | 3.26E-03 | 0.43  |
| ILMN_2282641 | TBXAS1    | 3.27E-03 | 0.52  |
| ILMN_1657708 | MGLL      | 3.27E-03 | -0.31 |
| ILMN_2233366 | ASAP1     | 3.27E-03 | -0.45 |
| ILMN_1656165 | USP9X     | 3.30E-03 | 0.37  |
| ILMN_2302654 | LRP8      | 3.30E-03 | -0.14 |
| ILMN_1808374 | SNTB2     | 3.31E-03 | 0.38  |
| ILMN_1748538 | ALDH1A2   | 3.35E-03 | -0.27 |
| ILMN_1669424 | LOC646531 | 3.36E-03 | 0.42  |
| ILMN_1760649 | PCK2      | 3.36E-03 | -0.33 |
| ILMN_2096083 | PLEKHA5   | 3.37E-03 | -0.19 |
| ILMN_3245057 | ASAP1     | 3.37E-03 | -0.42 |
| ILMN_1706261 | SLCO3A1   | 3.41E-03 | -0.26 |
| ILMN_1675542 | LOC729148 | 3.41E-03 | -0.35 |
| ILMN_1742859 | ACSS2     | 3.43E-03 | -0.22 |
| ILMN_1665557 | USP15     | 3.43E-03 | 0.37  |
| ILMN_1802205 | RHOB      | 3.44E-03 | 0.49  |
| ILMN_1700025 | LOC732007 | 3.47E-03 | -0.49 |
| ILMN_1810069 | CCNYL1    | 3.47E-03 | -0.31 |
| ILMN_1733831 | PGBD5     | 3.50E-03 | -0.15 |
| ILMN_2151739 | CAT       | 3.50E-03 | -0.41 |
| ILMN_2408796 | C19orf28  | 3.53E-03 | -0.32 |
| ILMN_1703650 | TNIP1     | 3.54E-03 | -0.34 |
| ILMN_1710078 | TMEM181   | 3.55E-03 | 0.43  |
| ILMN_1728262 | SAA2      | 3.55E-03 | 0.36  |
| ILMN_2230892 | IL10RB    | 3.55E-03 | -0.37 |
| ILMN_1731181 | TEX2      | 3.61E-03 | 0.42  |
| ILMN_3233930 | LOC390557 | 3.63E-03 | -0.40 |
| ILMN_2092850 | HPSE      | 3.63E-03 | -0.59 |
| ILMN_1703946 | ADORA2B   | 3.64E-03 | -0.43 |
| ILMN_1778136 | ZMYND15   | 3.65E-03 | -0.37 |
| ILMN_2109708 | ECGF1     | 3.65E-03 | -0.39 |
| ILMN_1676480 | LOC654053 | 3.65E-03 | -0.42 |
| ILMN_2413808 | CD53      | 3.65E-03 | 0.41  |
| ILMN_1717799 | PRKCE     | 3.65E-03 | 0.21  |
| ILMN_2173524 | FOXD4     | 3.65E-03 | -0.22 |
| ILMN_1857017 |           | 3.66E-03 | 0.52  |
| ILMN_2350801 | SLC25A29  | 3.66E-03 | -0.25 |
| ILMN_2289093 | KIAA1618  | 3.66E-03 | -0.38 |
| ILMN_1746704 | TRIM8     | 3.67E-03 | -0.38 |
| ILMN_1692664 | PRR5      | 3.67E-03 | -0.24 |
| ILMN_1659703 | WWP2      | 3.68E-03 | -0.28 |

|              |           |          |       |
|--------------|-----------|----------|-------|
| ILMN_1752965 | GREM1     | 3.69E-03 | -0.39 |
| ILMN_1740005 | SERPINF2  | 3.71E-03 | 0.18  |
| ILMN_1677955 | ENTPD6    | 3.73E-03 | 0.20  |
| ILMN_3245413 | DENND5A   | 3.73E-03 | -0.39 |
| ILMN_1674650 | C9orf95   | 3.75E-03 | 0.37  |
| ILMN_1675462 | LSM6      | 3.75E-03 | -0.31 |
| ILMN_1708672 | ACAT2     | 3.75E-03 | -0.67 |
| ILMN_1723709 | C9orf116  | 3.80E-03 | 0.14  |
| ILMN_2166524 | CCNYL1    | 3.80E-03 | -0.30 |
| ILMN_1688672 | SIGLECP3  | 3.81E-03 | -0.15 |
| ILMN_1773125 | ENTPD1    | 3.84E-03 | -0.39 |
| ILMN_1724493 | LYSMD2    | 3.84E-03 | -0.41 |
| ILMN_1667564 | ALDH3A2   | 3.84E-03 | -0.31 |
| ILMN_1706706 | WDR68     | 3.86E-03 | 0.41  |
| ILMN_3248443 | SNHG6     | 3.86E-03 | 0.44  |
| ILMN_1777565 | TAP2      | 3.86E-03 | -0.29 |
| ILMN_1676278 | ABCC2     | 3.86E-03 | 0.16  |
| ILMN_3308265 | MIR302C   | 3.86E-03 | -0.35 |
| ILMN_1794534 | CCDC81    | 3.87E-03 | -0.18 |
| ILMN_1668960 | MID1IP1   | 3.88E-03 | -0.39 |
| ILMN_1792885 | CTSC      | 3.88E-03 | 0.44  |
| ILMN_1739001 | TACSTD2   | 3.88E-03 | -0.47 |
| ILMN_1654735 | SLCO3A1   | 3.89E-03 | -0.32 |
| ILMN_1782788 | CSDA      | 3.89E-03 | 0.33  |
| ILMN_1681067 | PIK3R5    | 3.90E-03 | 0.24  |
| ILMN_2181445 | BCL2L13   | 3.90E-03 | -0.35 |
| ILMN_2412139 | CABYR     | 3.90E-03 | -0.22 |
| ILMN_1729161 | NOTCH1    | 3.91E-03 | -0.34 |
| ILMN_1703487 | LMO4      | 3.91E-03 | -0.53 |
| ILMN_1661335 | SPTBN1    | 3.92E-03 | 0.15  |
| ILMN_1711543 | C14orf169 | 3.92E-03 | -0.37 |
| ILMN_1795300 | FLJ41603  | 3.92E-03 | 0.59  |
| ILMN_1718171 | MED26     | 3.92E-03 | 0.18  |
| ILMN_2284744 | HNMT      | 3.93E-03 | -0.44 |
| ILMN_1738992 | MNDA      | 3.93E-03 | -0.52 |
| ILMN_1699644 | 42066     | 3.94E-03 | -0.24 |
| ILMN_1746206 | AZI1      | 3.94E-03 | -0.26 |
| ILMN_1802653 | EBI3      | 3.94E-03 | 0.50  |
| ILMN_1659470 | PBRM1     | 3.94E-03 | 0.30  |
| ILMN_1741356 | PRICKLE1  | 3.94E-03 | -0.17 |
| ILMN_1683859 | SLC7A1    | 3.94E-03 | -0.55 |
| ILMN_2128741 | RDH11     | 3.95E-03 | -0.37 |
| ILMN_2312897 | DGUOK     | 3.95E-03 | 0.40  |
| ILMN_1795835 | LOC338758 | 3.95E-03 | -0.46 |
| ILMN_2151579 | HMG1      | 3.97E-03 | -0.38 |
| ILMN_1662896 | BRWD2     | 3.99E-03 | -0.41 |

|              |              |          |       |
|--------------|--------------|----------|-------|
| ILMN_2083243 | MNAT1        | 4.00E-03 | -0.18 |
| ILMN_1749324 | DPYS         | 4.00E-03 | 0.16  |
| ILMN_1704290 | SPTLC2       | 4.07E-03 | 0.20  |
| ILMN_1690342 | LTA4H        | 4.09E-03 | -0.43 |
| ILMN_1781565 | MESDC1       | 4.09E-03 | -0.24 |
| ILMN_1756326 | CKS2         | 4.09E-03 | 0.34  |
| ILMN_2162972 | LYZ          | 4.11E-03 | -0.70 |
| ILMN_2338963 | SLC29A1      | 4.11E-03 | 0.38  |
| ILMN_1705107 | SDCBP2       | 4.11E-03 | 0.12  |
| ILMN_1665100 | PTGS1        | 4.11E-03 | -0.24 |
| ILMN_2396020 | DUSP6        | 4.12E-03 | -0.51 |
| ILMN_1763129 | DCTPP1       | 4.14E-03 | -0.33 |
| ILMN_1901616 |              | 4.14E-03 | -0.29 |
| ILMN_1793517 | RASAL1       | 4.14E-03 | -0.42 |
| ILMN_1738712 | GPR180       | 4.17E-03 | -0.29 |
| ILMN_1709880 | RPLP0        | 4.17E-03 | 0.38  |
| ILMN_1669881 | TSPAN13      | 4.20E-03 | -0.21 |
| ILMN_1660815 | CAB39L       | 4.21E-03 | -0.15 |
| ILMN_1795839 | SCCPDH       | 4.22E-03 | -0.35 |
| ILMN_1763609 | SLC22A16     | 4.23E-03 | 0.31  |
| ILMN_1808789 | MYO5C        | 4.27E-03 | 0.21  |
| ILMN_2412336 | AKR1C2       | 4.31E-03 | 0.46  |
| ILMN_2404385 | REPIN1       | 4.32E-03 | -0.43 |
| ILMN_3238680 | C7orf55      | 4.34E-03 | 0.46  |
| ILMN_2150654 | ZSWIM4       | 4.35E-03 | -0.41 |
| ILMN_3240900 | LOC100134728 | 4.38E-03 | -0.31 |
| ILMN_2078592 | C6orf105     | 4.39E-03 | -0.15 |
| ILMN_2189406 | C15orf38     | 4.43E-03 | -0.39 |
| ILMN_2344650 | N4BP2L1      | 4.53E-03 | 0.34  |
| ILMN_1663035 | SREBF1       | 4.54E-03 | -0.31 |
| ILMN_3258795 | FAM13B       | 4.55E-03 | -0.40 |
| ILMN_1671183 | LOC648749    | 4.55E-03 | 0.21  |
| ILMN_1782829 | GLTSCR1      | 4.56E-03 | 0.30  |
| ILMN_3237270 | LOC100133609 | 4.60E-03 | -0.23 |
| ILMN_2173294 | FLJ10916     | 4.60E-03 | 0.38  |
| ILMN_2343010 | BOLA3        | 4.63E-03 | -0.53 |
| ILMN_1717165 | IGBP1        | 4.64E-03 | 0.37  |
| ILMN_1664265 | EPHA1        | 4.64E-03 | -0.22 |
| ILMN_3305304 | POLD2        | 4.67E-03 | -0.20 |
| ILMN_1813120 | MAP4K3       | 4.68E-03 | 0.33  |
| ILMN_2145280 | DEF6         | 4.68E-03 | -0.42 |
| ILMN_1679324 | EIF1B        | 4.70E-03 | 0.43  |
| ILMN_2221564 | LYAR         | 4.71E-03 | 0.38  |
| ILMN_1711828 | ANKRD10      | 4.75E-03 | 0.32  |
| ILMN_3272500 | IFI27L1      | 4.76E-03 | 0.47  |
| ILMN_1779547 | HPSE         | 4.76E-03 | -0.38 |

|              |           |          |       |
|--------------|-----------|----------|-------|
| ILMN_2367681 | SPAG1     | 4.77E-03 | -0.22 |
| ILMN_1756572 | COQ2      | 4.79E-03 | -0.39 |
| ILMN_1771664 | CLEC4E    | 4.79E-03 | 0.25  |
| ILMN_1743456 | ZCCHC14   | 4.79E-03 | 0.31  |
| ILMN_1780663 | KLHL30    | 4.81E-03 | 0.14  |
| ILMN_1664631 | ADAM28    | 4.81E-03 | -0.27 |
| ILMN_1713749 | CORO1A    | 4.83E-03 | -0.36 |
| ILMN_3247998 | STAP1     | 4.84E-03 | -0.24 |
| ILMN_2291644 | SIRT5     | 4.86E-03 | 0.17  |
| ILMN_2354953 | NQO1      | 4.87E-03 | -0.19 |
| ILMN_1754149 | LETMD1    | 4.88E-03 | 0.33  |
| ILMN_1711786 | NFE2      | 4.89E-03 | -0.18 |
| ILMN_2170813 | LAMP3     | 4.91E-03 | -0.63 |
| ILMN_1800951 | ATXN1     | 4.93E-03 | -0.34 |
| ILMN_1743538 | MLLT10    | 4.94E-03 | 0.30  |
| ILMN_2221046 | GM2A      | 4.94E-03 | -0.50 |
| ILMN_1656254 | NOTCH2NL  | 4.95E-03 | 0.39  |
| ILMN_1714417 | PSEN2     | 4.95E-03 | -0.47 |
| ILMN_1793349 | MOBKL1A   | 4.96E-03 | -0.28 |
| ILMN_1681601 | SUCNR1    | 4.99E-03 | -0.48 |
| ILMN_1791593 | DENND5B   | 4.99E-03 | -0.17 |
| ILMN_1651628 | EXOC6     | 4.99E-03 | -0.32 |
| ILMN_1791792 | C12orf5   | 5.04E-03 | -0.38 |
| ILMN_1892403 | SNORD13   | 5.06E-03 | 0.37  |
| ILMN_2373515 | HSP90AA1  | 5.07E-03 | -0.32 |
| ILMN_1773245 | CCL3L1    | 5.09E-03 | -0.26 |
| ILMN_2188722 | GLS       | 5.12E-03 | -0.41 |
| ILMN_1742052 | SERPINB9  | 5.13E-03 | -0.19 |
| ILMN_3235221 | LOC644936 | 5.14E-03 | -0.39 |
| ILMN_2335813 | GCH1      | 5.15E-03 | -0.15 |
| ILMN_1716019 | RHBDL3    | 5.18E-03 | 0.18  |
| ILMN_1803033 | MGST1     | 5.19E-03 | 0.26  |
| ILMN_1678547 | CPNE9     | 5.21E-03 | -0.26 |
| ILMN_1682176 | CLEC3B    | 5.21E-03 | 0.32  |
| ILMN_2299795 | CPM       | 5.22E-03 | 0.42  |
| ILMN_1716988 | OPN3      | 5.23E-03 | 0.40  |
| ILMN_2120273 | AP1S2     | 5.26E-03 | -0.40 |
| ILMN_1655497 | EIF4B     | 5.26E-03 | 0.37  |
| ILMN_2121068 | ADAM17    | 5.30E-03 | 0.38  |
| ILMN_2216157 | GNA12     | 5.30E-03 | -0.33 |
| ILMN_1801584 | CXCR4     | 5.30E-03 | 0.42  |
| ILMN_1655137 | ZCCHC11   | 5.30E-03 | 0.27  |
| ILMN_2213558 | TMED10P   | 5.30E-03 | 0.34  |
| ILMN_1674574 | VNN1      | 5.30E-03 | 0.24  |
| ILMN_2208495 | LASS5     | 5.30E-03 | -0.31 |
| ILMN_1683682 | DAGLA     | 5.32E-03 | -0.46 |



|              |           |          |       |
|--------------|-----------|----------|-------|
| ILMN_1728512 | YWHAH     | 5.32E-03 | -0.42 |
| ILMN_1736567 | CD74      | 5.32E-03 | -0.37 |
| ILMN_1780560 | MYO18A    | 5.37E-03 | -0.32 |
| ILMN_1768004 | PDCD4     | 5.44E-03 | 0.21  |
| ILMN_1787115 | VWTR1     | 5.44E-03 | 0.23  |
| ILMN_1667966 | C1orf24   | 5.46E-03 | -0.48 |
| ILMN_1764970 | JMJD1C    | 5.46E-03 | 0.35  |
| ILMN_2357031 | AADAT     | 5.46E-03 | 0.15  |
| ILMN_2230016 | HIGD1A    | 5.51E-03 | -0.35 |
| ILMN_1655191 | CASZ1     | 5.51E-03 | -0.26 |
| ILMN_1705153 | NEFH      | 5.51E-03 | -0.35 |
| ILMN_3240997 | ARAP3     | 5.51E-03 | -0.20 |
| ILMN_3239217 | LOC729057 | 5.57E-03 | 0.24  |
| ILMN_1754114 | FLJ20021  | 5.58E-03 | 0.36  |
| ILMN_1708248 | LILRB1    | 5.63E-03 | -0.19 |
| ILMN_1759948 | RNF5P1    | 5.69E-03 | 0.36  |
| ILMN_1731639 | CASP3     | 5.73E-03 | 0.22  |
| ILMN_1718960 | SERPIN8   | 5.73E-03 | -0.35 |
| ILMN_2407564 | GPR98     | 5.74E-03 | 0.10  |
| ILMN_1713934 | LITAF     | 5.75E-03 | -0.39 |
| ILMN_1807556 | LOC146177 | 5.76E-03 | 0.27  |
| ILMN_1696360 | CTSB      | 5.77E-03 | -0.45 |
| ILMN_1730809 | SLC29A2   | 5.82E-03 | 0.30  |
| ILMN_2411781 | RYR1      | 5.82E-03 | 0.29  |
| ILMN_2130525 | TSPAN13   | 5.82E-03 | -0.14 |
| ILMN_2106902 | CHES1     | 5.82E-03 | 0.37  |
| ILMN_1777325 | STAT1     | 5.85E-03 | -0.37 |
| ILMN_1720373 | SLC7A5    | 5.85E-03 | -0.74 |
| ILMN_3237329 | FNIP2     | 5.85E-03 | 0.40  |
| ILMN_1810289 | FER1L3    | 5.85E-03 | -0.37 |
| ILMN_1654370 | TESK2     | 5.85E-03 | 0.21  |
| ILMN_2086238 | SMYD4     | 5.89E-03 | 0.28  |
| ILMN_2413644 | TM4SF19   | 5.91E-03 | -0.57 |
| ILMN_1741096 | FDFT1     | 5.93E-03 | -0.43 |
| ILMN_1701461 | TIMP3     | 5.96E-03 | -0.44 |
| ILMN_2340052 | NCOR2     | 6.00E-03 | 0.34  |
| ILMN_1720604 | ARSG      | 6.03E-03 | 0.22  |
| ILMN_1728132 | LDHB      | 6.05E-03 | 0.46  |
| ILMN_2136455 | C3orf64   | 6.05E-03 | -0.32 |
| ILMN_2334296 | IL18BP    | 6.07E-03 | -0.46 |
| ILMN_1739161 | PPAP2A    | 6.08E-03 | -0.15 |
| ILMN_1675258 | LOC441268 | 6.10E-03 | -0.29 |
| ILMN_2053490 | FAM53B    | 6.14E-03 | 0.18  |
| ILMN_2373566 | PJA1      | 6.17E-03 | -0.25 |
| ILMN_1668498 | CWF19L2   | 6.20E-03 | 0.30  |
| ILMN_1694259 | NSA2      | 6.21E-03 | 0.34  |

|              |              |          |       |
|--------------|--------------|----------|-------|
| ILMN_1815745 | SOX4         | 6.23E-03 | -0.38 |
| ILMN_2176063 | FCGR1A       | 6.23E-03 | -0.69 |
| ILMN_2231911 | AUH          | 6.24E-03 | 0.35  |
| ILMN_1683250 | LOC440731    | 6.25E-03 | 0.25  |
| ILMN_1715508 | NNMT         | 6.25E-03 | 0.15  |
| ILMN_2298365 | PPP2R2B      | 6.27E-03 | -0.33 |
| ILMN_1723729 | RSL1D1       | 6.27E-03 | 0.42  |
| ILMN_1782086 | AOC3         | 6.27E-03 | 0.33  |
| ILMN_3236904 | LOC648740    | 6.27E-03 | -0.19 |
| ILMN_1689200 | DHDH         | 6.31E-03 | 0.37  |
| ILMN_1660111 | UCHL3        | 6.31E-03 | -0.43 |
| ILMN_3241081 | LOC100134361 | 6.35E-03 | 0.22  |
| ILMN_1701173 | KCNK6        | 6.37E-03 | -0.30 |
| ILMN_1753342 | SAT1         | 6.39E-03 | 0.30  |
| ILMN_3235597 | LOC147727    | 6.39E-03 | 0.21  |
| ILMN_2391051 | FCGR1B       | 6.41E-03 | -0.64 |
| ILMN_1652680 | LOC652616    | 6.44E-03 | 0.41  |
| ILMN_1664453 | LOC653276    | 6.46E-03 | 0.16  |
| ILMN_1681415 | SIGLEC7      | 6.48E-03 | -0.26 |
| ILMN_1660629 | NBEAL2       | 6.49E-03 | -0.29 |
| ILMN_2395728 | HNRPUL1      | 6.49E-03 | 0.32  |
| ILMN_1698752 | NLRX1        | 6.53E-03 | -0.16 |
| ILMN_1727134 | KLHDC5       | 6.57E-03 | -0.26 |
| ILMN_1764043 | TTL          | 6.57E-03 | 0.34  |
| ILMN_1654639 | HERC6        | 6.61E-03 | -0.34 |
| ILMN_1864166 |              | 6.62E-03 | -0.21 |
| ILMN_1685645 | MYOHD1       | 6.62E-03 | 0.09  |
| ILMN_1813669 | ANKS1A       | 6.64E-03 | 0.34  |
| ILMN_1699750 | ABHD9        | 6.65E-03 | 0.20  |
| ILMN_1656837 | RBP1         | 6.65E-03 | -0.40 |
| ILMN_1743432 | DGUOK        | 6.65E-03 | 0.34  |
| ILMN_1808783 | STRBP        | 6.65E-03 | -0.23 |
| ILMN_1822378 |              | 6.68E-03 | 0.14  |
| ILMN_3228688 | LOC730415    | 6.68E-03 | -0.44 |
| ILMN_1738675 | PTPN6        | 6.68E-03 | -0.37 |
| ILMN_1726030 | GPX7         | 6.70E-03 | 0.16  |
| ILMN_3289508 | LOC339192    | 6.70E-03 | -0.52 |
| ILMN_1772722 | MRPS33       | 6.71E-03 | 0.36  |
| ILMN_1799198 | OTUB2        | 6.71E-03 | 0.26  |
| ILMN_3237956 | ZC3H12C      | 6.71E-03 | 0.42  |
| ILMN_1652797 | FAM174B      | 6.73E-03 | -0.19 |
| ILMN_1780057 | RENBP        | 6.75E-03 | 0.39  |
| ILMN_1694075 | GADD45A      | 6.75E-03 | 0.34  |
| ILMN_1668055 | SAA4         | 6.80E-03 | 0.16  |
| ILMN_2347541 | NIN          | 6.80E-03 | -0.21 |
| ILMN_1707464 | MST1         | 6.82E-03 | 0.35  |

|              |              |          |       |
|--------------|--------------|----------|-------|
| ILMN_1654398 | RGL1         | 6.82E-03 | 0.38  |
| ILMN_2370091 | NGFRAP1      | 6.83E-03 | -0.42 |
| ILMN_1763228 | MEF2D        | 6.88E-03 | -0.36 |
| ILMN_1808354 | SLC4A7       | 6.90E-03 | -0.30 |
| ILMN_1801119 | BCL2         | 6.90E-03 | -0.20 |
| ILMN_1736940 | HPRT1        | 6.93E-03 | -0.37 |
| ILMN_1656662 | LOC731365    | 6.93E-03 | 0.38  |
| ILMN_2048326 | RPS27A       | 6.95E-03 | 0.30  |
| ILMN_1708059 | USP13        | 6.98E-03 | -0.20 |
| ILMN_1747305 | GIMAP8       | 6.98E-03 | 0.32  |
| ILMN_2268068 | MAPKAP1      | 7.00E-03 | -0.28 |
| ILMN_1695246 | KLHDC8B      | 7.01E-03 | -0.34 |
| ILMN_1687306 | LGALS2       | 7.08E-03 | -0.97 |
| ILMN_2376289 | DBNL         | 7.09E-03 | -0.28 |
| ILMN_1804396 | C14orf4      | 7.09E-03 | 0.36  |
| ILMN_1738718 | CYB561D2     | 7.14E-03 | -0.30 |
| ILMN_2117171 | LMO4         | 7.16E-03 | -0.40 |
| ILMN_1766896 | ZDHHHC19     | 7.16E-03 | -0.23 |
| ILMN_2330845 | NSF          | 7.18E-03 | -0.32 |
| ILMN_1718766 | MT1F         | 7.18E-03 | 0.36  |
| ILMN_2125747 | LOC606724    | 7.18E-03 | -0.36 |
| ILMN_1669833 | SH2B2        | 7.19E-03 | -0.10 |
| ILMN_1805916 | NIPSNAP1     | 7.21E-03 | -0.23 |
| ILMN_1712959 | DUSP2        | 7.25E-03 | -0.26 |
| ILMN_1683065 | C2orf64      | 7.25E-03 | 0.32  |
| ILMN_1680353 | NSF          | 7.25E-03 | -0.32 |
| ILMN_1693650 | FES          | 7.31E-03 | 0.46  |
| ILMN_1775486 | SSPN         | 7.32E-03 | -0.19 |
| ILMN_1706873 | RPL34        | 7.32E-03 | 0.36  |
| ILMN_2219712 | HMGB2        | 7.33E-03 | 0.38  |
| ILMN_1780036 | WDR1         | 7.37E-03 | -0.34 |
| ILMN_1678961 | FRMD4A       | 7.45E-03 | 0.29  |
| ILMN_1777745 | FAM133B      | 7.46E-03 | 0.24  |
| ILMN_2313730 | RHOC         | 7.47E-03 | -0.42 |
| ILMN_1730731 | ERLIN1       | 7.49E-03 | 0.26  |
| ILMN_1845086 |              | 7.56E-03 | 0.20  |
| ILMN_2218002 | LIPC         | 7.58E-03 | -0.16 |
| ILMN_1726204 | SCRG1        | 7.59E-03 | 0.11  |
| ILMN_1723768 | NLRX1        | 7.63E-03 | -0.36 |
| ILMN_3236239 | LOC100129550 | 7.65E-03 | -0.41 |
| ILMN_3192791 | HNRNPM       | 7.65E-03 | -0.29 |
| ILMN_1815895 | LOC649143    | 7.69E-03 | -0.61 |
| ILMN_1738632 | PRKAR1A      | 7.69E-03 | -0.35 |
| ILMN_1671554 | LPIN1        | 7.70E-03 | -0.40 |
| ILMN_1809292 | IMMP2L       | 7.73E-03 | 0.18  |
| ILMN_1771800 | PRKCA        | 7.74E-03 | -0.27 |

|              |              |          |       |
|--------------|--------------|----------|-------|
| ILMN_1844128 |              | 7.75E-03 | 0.15  |
| ILMN_1802708 | BTN3A1       | 7.80E-03 | 0.34  |
| ILMN_2083946 | TGFA         | 7.81E-03 | -0.37 |
| ILMN_1701094 | CLN8         | 7.82E-03 | 0.21  |
| ILMN_1770388 | VPS39        | 7.82E-03 | 0.28  |
| ILMN_1706005 | GALT         | 7.83E-03 | 0.26  |
| ILMN_1679428 | CHIC2        | 7.84E-03 | 0.34  |
| ILMN_1699836 | LSP1         | 7.84E-03 | -0.25 |
| ILMN_1761147 | GABPB2       | 7.84E-03 | -0.26 |
| ILMN_1756826 | MORN2        | 7.88E-03 | -0.23 |
| ILMN_2124816 | ZNF34        | 7.89E-03 | 0.16  |
| ILMN_3277905 | LOC645313    | 7.92E-03 | -0.14 |
| ILMN_1762899 | EGR1         | 7.92E-03 | -0.41 |
| ILMN_1657862 | AHCY         | 7.96E-03 | 0.45  |
| ILMN_1764364 | FAM19A3      | 7.97E-03 | -0.25 |
| ILMN_1742410 | BCL2L1       | 7.97E-03 | 0.31  |
| ILMN_1674706 | MTHFD2       | 7.97E-03 | -0.40 |
| ILMN_1846922 |              | 7.97E-03 | 0.32  |
| ILMN_1661366 | PGAM1        | 7.97E-03 | -0.35 |
| ILMN_1678353 | FARP1        | 7.98E-03 | 0.30  |
| ILMN_1684789 | CCDC101      | 8.02E-03 | 0.30  |
| ILMN_1651710 | IQCD         | 8.02E-03 | -0.12 |
| ILMN_1798654 | MCM6         | 8.03E-03 | -0.36 |
| ILMN_3307757 | C17orf87     | 8.04E-03 | -0.34 |
| ILMN_1782305 | NR4A2        | 8.04E-03 | -0.26 |
| ILMN_2326953 | LAT2         | 8.07E-03 | -0.37 |
| ILMN_1797822 | SEL1L3       | 8.13E-03 | -0.35 |
| ILMN_1678004 | TMEM41B      | 8.16E-03 | -0.34 |
| ILMN_1771333 | CD47         | 8.19E-03 | -0.26 |
| ILMN_1733758 | MT1B         | 8.27E-03 | 0.41  |
| ILMN_1658481 | DGUOK        | 8.27E-03 | 0.16  |
| ILMN_3242105 | LOC100134073 | 8.27E-03 | -0.28 |
| ILMN_1743130 | PTGFRN       | 8.27E-03 | -0.27 |
| ILMN_1756910 | PLA2G15      | 8.29E-03 | -0.38 |
| ILMN_2173291 | CYP4B1       | 8.31E-03 | -0.35 |
| ILMN_1802106 | APOBEC3G     | 8.34E-03 | -0.31 |
| ILMN_1738681 | NUP62        | 8.38E-03 | -0.32 |
| ILMN_1776936 | ANKRD38      | 8.39E-03 | 0.34  |
| ILMN_1735930 | KLF2         | 8.41E-03 | -0.35 |
| ILMN_1669781 | PRLR         | 8.43E-03 | 0.14  |
| ILMN_1719695 | NFKBIZ       | 8.43E-03 | 0.46  |
| ILMN_2115011 | FGD2         | 8.44E-03 | 0.41  |
| ILMN_2255310 | RPS15A       | 8.44E-03 | 0.33  |
| ILMN_1783621 | CMPK2        | 8.44E-03 | -0.35 |
| ILMN_1663541 | B4GALT7      | 8.46E-03 | -0.32 |
| ILMN_1769694 | ACCN2        | 8.47E-03 | -0.33 |

|              |           |          |       |
|--------------|-----------|----------|-------|
| ILMN_2129015 | AFF1      | 8.47E-03 | 0.30  |
| ILMN_2337928 | CXCR5     | 8.48E-03 | -0.32 |
| ILMN_1802082 | PRDM8     | 8.49E-03 | -0.15 |
| ILMN_1672503 | DPYSL2    | 8.51E-03 | -0.44 |
| ILMN_1767509 | DEF8      | 8.53E-03 | -0.31 |
| ILMN_1736757 | GNPTAB    | 8.54E-03 | -0.37 |
| ILMN_1699058 | LOC644979 | 8.56E-03 | 0.20  |
| ILMN_1751561 | CAMK1D    | 8.59E-03 | 0.20  |
| ILMN_2348448 | SRGAP2    | 8.59E-03 | 0.12  |
| ILMN_1813701 | RASAL2    | 8.59E-03 | -0.19 |
| ILMN_1731736 | RIN3      | 8.59E-03 | 0.26  |
| ILMN_1799487 | N4BP2L1   | 8.60E-03 | 0.32  |
| ILMN_1782389 | LAD1      | 8.60E-03 | -0.34 |
| ILMN_1664718 | CYP51A1   | 8.60E-03 | -0.34 |
| ILMN_1679826 | CST7      | 8.61E-03 | -0.47 |
| ILMN_1751464 | TNFSF9    | 8.61E-03 | -0.30 |
| ILMN_1666269 | CTSZ      | 8.68E-03 | -0.39 |
| ILMN_1856634 |           | 8.68E-03 | 0.15  |
| ILMN_1796074 | C18orf56  | 8.68E-03 | 0.23  |
| ILMN_1774447 | AMPD3     | 8.69E-03 | -0.24 |
| ILMN_1766094 | MOSPD2    | 8.70E-03 | -0.31 |
| ILMN_1712636 | NVL       | 8.73E-03 | 0.30  |
| ILMN_1668863 | LYPD1     | 8.73E-03 | -0.32 |
| ILMN_2339955 | NR4A2     | 8.76E-03 | -0.27 |
| ILMN_1750062 | PPARGC1A  | 8.76E-03 | 0.27  |
| ILMN_1790801 | RPS6KA2   | 8.76E-03 | 0.11  |
| ILMN_1784238 | SEC22B    | 8.76E-03 | -0.36 |
| ILMN_1746941 | HIPK3     | 8.76E-03 | 0.14  |
| ILMN_1678423 | SPA17     | 8.79E-03 | -0.26 |
| ILMN_1758642 | FLJ90757  | 8.79E-03 | -0.17 |
| ILMN_1677092 | GEM       | 8.86E-03 | -0.35 |
| ILMN_1807925 | GNG2      | 8.86E-03 | -0.15 |
| ILMN_1716563 | PRKCB1    | 8.86E-03 | -0.17 |
| ILMN_2400219 | SRI       | 8.86E-03 | -0.21 |
| ILMN_2135272 | GIMAP2    | 8.86E-03 | 0.41  |
| ILMN_1711928 | FLJ20920  | 8.88E-03 | -0.22 |
| ILMN_1744212 | INPP5D    | 8.89E-03 | -0.35 |
| ILMN_1715175 | MET       | 8.93E-03 | 0.33  |
| ILMN_2214790 | LAMB1     | 8.95E-03 | 0.29  |
| ILMN_1719256 | CKS1B     | 8.95E-03 | 0.28  |
| ILMN_1764361 | DUSP16    | 8.97E-03 | 0.40  |
| ILMN_1753265 | C12orf76  | 8.97E-03 | 0.31  |
| ILMN_3200140 | LOC645638 | 8.98E-03 | 0.73  |
| ILMN_2396956 | AKAP13    | 9.00E-03 | 0.34  |
| ILMN_1815057 | PDGFRB    | 9.00E-03 | 0.18  |
| ILMN_1778144 | FLJ20489  | 9.01E-03 | -0.30 |

|              |           |          |       |
|--------------|-----------|----------|-------|
| ILMN_1779171 | SGSM2     | 9.05E-03 | -0.29 |
| ILMN_3235704 | GGT3      | 9.11E-03 | -0.29 |
| ILMN_2269256 | DNAJC12   | 9.11E-03 | 0.17  |
| ILMN_2106725 | NCF1B     | 9.11E-03 | 0.39  |
| ILMN_2237746 | ING3      | 9.13E-03 | 0.32  |
| ILMN_1700001 | TCTA      | 9.19E-03 | 0.24  |
| ILMN_1703538 | AIF1      | 9.21E-03 | -0.37 |
| ILMN_1657435 | MT1M      | 9.22E-03 | 0.57  |
| ILMN_2202637 | CRY1      | 9.23E-03 | -0.31 |
| ILMN_1803779 | AP2A2     | 9.24E-03 | 0.18  |
| ILMN_1685580 | CBLB      | 9.24E-03 | 0.39  |
| ILMN_1808566 | TMEM180   | 9.27E-03 | 0.27  |
| ILMN_2153466 | FAM50B    | 9.28E-03 | 0.23  |
| ILMN_1799819 | MARS      | 9.33E-03 | -0.35 |
| ILMN_1775170 | MT1X      | 9.33E-03 | 0.34  |
| ILMN_1808779 | CSTF3     | 9.34E-03 | -0.28 |
| ILMN_2360784 | RRBP1     | 9.36E-03 | -0.34 |
| ILMN_1726245 | TGFBR2    | 9.37E-03 | -0.31 |
| ILMN_1741917 | OSCAR     | 9.40E-03 | -0.35 |
| ILMN_2364384 | PPARG     | 9.43E-03 | 0.32  |
| ILMN_1668369 | CDC37     | 9.43E-03 | -0.32 |
| ILMN_1786612 | PSME2     | 9.44E-03 | -0.38 |
| ILMN_1791569 | PLXNA1    | 9.45E-03 | 0.24  |
| ILMN_1870303 |           | 9.47E-03 | 0.18  |
| ILMN_3243055 | LOC732432 | 9.48E-03 | 0.32  |
| ILMN_1730491 | FMNL2     | 9.48E-03 | 0.30  |
| ILMN_1819783 |           | 9.50E-03 | 0.45  |
| ILMN_1731745 | NINJ2     | 9.56E-03 | 0.37  |
| ILMN_2329114 | COLQ      | 9.59E-03 | -0.16 |
| ILMN_1808196 | GSTO1     | 9.60E-03 | -0.33 |
| ILMN_1865056 |           | 9.61E-03 | 0.17  |
| ILMN_1706057 | CS        | 9.65E-03 | -0.34 |
| ILMN_1662843 | CD53      | 9.66E-03 | 0.41  |
| ILMN_1803945 | HCP5      | 9.67E-03 | -0.30 |
| ILMN_1791314 | RGS12     | 9.67E-03 | -0.14 |
| ILMN_1697817 | PANX1     | 9.70E-03 | 0.28  |
| ILMN_1712950 | PFN1      | 9.70E-03 | -0.35 |
| ILMN_2054019 | ISG15     | 9.71E-03 | -0.44 |
| ILMN_1760778 | ENG       | 9.73E-03 | -0.41 |
| ILMN_1778360 | PYGB      | 9.73E-03 | 0.30  |
| ILMN_1795026 | FAM189B   | 9.73E-03 | 0.30  |
| ILMN_1752213 | TMEM60    | 9.73E-03 | 0.37  |
| ILMN_1713603 | PRKCB1    | 9.76E-03 | -0.17 |
| ILMN_1680618 | MYC       | 9.76E-03 | 0.29  |
| ILMN_1673542 | AKAP14    | 9.83E-03 | 0.10  |
| ILMN_1659914 | C9orf98   | 9.94E-03 | -0.39 |

ILMN\_3226875 LOC728590 9.94E-03 0.35

**Apoptotic neutrophils (PMNs)**

| <b>ProbeID</b> | <b>Gene Symbol</b> | <b>FDR</b> | <b>Log<sub>2</sub>[PMNs/NoTx]</b> |
|----------------|--------------------|------------|-----------------------------------|
| ILMN_2053415   | LDLR               | 5.44E-05   | -2.28                             |
| ILMN_2239754   | IFIT3              | 1.63E-04   | -1.22                             |
| ILMN_1723912   | IFI44L             | 1.63E-04   | -1.62                             |
| ILMN_1670134   | FADS1              | 1.63E-04   | -1.00                             |
| ILMN_1798181   | IRF7               | 1.63E-04   | -1.01                             |
| ILMN_1689842   | SC4MOL             | 1.63E-04   | -0.95                             |
| ILMN_1793474   | INSIG1             | 1.63E-04   | -1.36                             |
| ILMN_2349061   | IRF7               | 2.02E-04   | -0.55                             |
| ILMN_1720889   | SC4MOL             | 4.50E-04   | -1.28                             |
| ILMN_2144088   | FDFT1              | 4.50E-04   | -0.88                             |
| ILMN_1800512   | HMOX1              | 1.08E-03   | 1.12                              |
| ILMN_1707695   | IFIT1              | 1.20E-03   | -0.87                             |
| ILMN_1778144   | FLJ20489           | 1.22E-03   | 0.70                              |
| ILMN_1695246   | KLHDC8B            | 1.33E-03   | 1.04                              |
| ILMN_1739428   | IFIT2              | 1.39E-03   | -1.04                             |
| ILMN_1663042   | SDC4               | 1.42E-03   | 0.55                              |
| ILMN_1814305   | SAMD9              | 1.44E-03   | -0.70                             |
| ILMN_1729188   | HAMP               | 1.44E-03   | 1.17                              |
| ILMN_2099277   | HTRA4              | 1.57E-03   | 0.69                              |
| ILMN_2231928   | MX2                | 1.57E-03   | -0.77                             |
| ILMN_1657395   | HMGCR              | 1.62E-03   | -0.82                             |
| ILMN_1742618   | XAF1               | 1.71E-03   | -1.08                             |
| ILMN_1727309   | FAM82A2            | 1.74E-03   | 1.06                              |
| ILMN_1674063   | OAS2               | 1.74E-03   | -0.90                             |
| ILMN_1713505   | NPC1               | 1.85E-03   | 0.74                              |
| ILMN_1784871   | FASN               | 2.02E-03   | -0.68                             |
| ILMN_1696537   | DDIT4L             | 2.02E-03   | 0.70                              |
| ILMN_1755075   | IDI1               | 2.10E-03   | -0.75                             |
| ILMN_1760062   | IFI44              | 2.10E-03   | -0.96                             |
| ILMN_2041293   | SQLE               | 2.12E-03   | -1.07                             |
| ILMN_1794782   | ABCG1              | 2.12E-03   | 1.44                              |
| ILMN_1797728   | HMGCS1             | 2.12E-03   | -0.67                             |
| ILMN_1728048   | LOC158160          | 2.12E-03   | -0.44                             |
| ILMN_1739751   | SLC26A11           | 2.12E-03   | 0.88                              |
| ILMN_1658247   | OAS1               | 2.12E-03   | -0.63                             |
| ILMN_1787509   | PRIC285            | 2.18E-03   | -0.58                             |
| ILMN_1664718   | CYP51A1            | 2.32E-03   | -0.66                             |
| ILMN_1662640   | C20orf127          | 2.34E-03   | -1.31                             |
| ILMN_3298410   | LOC729120          | 2.40E-03   | 0.52                              |
| ILMN_1701789   | IFIT3              | 2.40E-03   | -1.14                             |

|              |              |          |       |
|--------------|--------------|----------|-------|
| ILMN_2388547 | EPSTI1       | 2.47E-03 | -0.83 |
| ILMN_2136089 | MTE          | 2.47E-03 | -1.18 |
| ILMN_1768814 | KLHL6        | 2.47E-03 | 0.52  |
| ILMN_1742929 | HESX1        | 2.77E-03 | -0.54 |
| ILMN_1729749 | HERC5        | 2.77E-03 | -0.82 |
| ILMN_2173975 | RTP4         | 2.89E-03 | -0.39 |
| ILMN_3247261 | RAPGEF2      | 3.05E-03 | 0.51  |
| ILMN_2173611 | MT1E         | 3.05E-03 | -1.21 |
| ILMN_3246910 | LOC100190986 | 3.05E-03 | 0.52  |
| ILMN_1814022 | NR1H3        | 3.05E-03 | 0.81  |
| ILMN_1726114 | SLC45A3      | 3.05E-03 | 0.65  |
| ILMN_2075643 | ANKRD29      | 3.36E-03 | 0.38  |
| ILMN_1787461 | RUNX3        | 3.39E-03 | -0.49 |
| ILMN_1661599 | DDIT4        | 3.42E-03 | -1.17 |
| ILMN_3229324 | SGK1         | 3.72E-03 | 0.58  |
| ILMN_1654118 | BCL2L1       | 3.72E-03 | 0.66  |
| ILMN_1801307 | TNFSF10      | 3.73E-03 | -0.62 |
| ILMN_2360705 | ACSL3        | 3.73E-03 | -0.60 |
| ILMN_2329927 | ABCG1        | 3.75E-03 | 1.13  |
| ILMN_1674811 | OASL         | 3.81E-03 | -0.59 |
| ILMN_1704753 | EPAS1        | 4.20E-03 | 0.60  |
| ILMN_1664543 | IFIT3        | 4.23E-03 | -0.52 |
| ILMN_1658407 | SLC43A3      | 4.23E-03 | 0.51  |
| ILMN_1741096 | FDFT1        | 4.23E-03 | -0.81 |
| ILMN_1761281 | LOC441019    | 4.42E-03 | -0.94 |
| ILMN_1652198 | CCM2         | 4.42E-03 | -0.48 |
| ILMN_2276758 | POFUT1       | 4.42E-03 | 0.65  |
| ILMN_1712708 | TRIM47       | 4.42E-03 | 0.38  |
| ILMN_1772241 | SQLE         | 4.42E-03 | -0.51 |
| ILMN_1683923 | MT1H         | 4.43E-03 | -1.14 |
| ILMN_1684887 | SAMSN1       | 4.96E-03 | -0.79 |
| ILMN_3227321 | LOC731542    | 4.96E-03 | 0.59  |
| ILMN_1717207 | MMP25        | 5.07E-03 | -0.48 |
| ILMN_2352121 | NT5C3        | 5.15E-03 | -0.72 |
| ILMN_3238053 | LOC100129211 | 5.62E-03 | 0.51  |
| ILMN_1673711 | HSP90AB1     | 5.62E-03 | 0.59  |
| ILMN_1781373 | IFIH1        | 5.62E-03 | -0.62 |
| ILMN_1704873 | TCEB1        | 5.62E-03 | 0.45  |
| ILMN_1691860 | SPRY1        | 5.62E-03 | 0.38  |
| ILMN_1652680 | LOC652616    | 5.62E-03 | -0.41 |
| ILMN_2054019 | ISG15        | 5.62E-03 | -0.56 |
| ILMN_1807919 | TNS1         | 5.76E-03 | 0.50  |
| ILMN_2130078 | CDKN2AIPNL   | 5.76E-03 | 0.61  |
| ILMN_2105573 | CCL3L3       | 5.76E-03 | 0.63  |
| ILMN_1675640 | OAS1         | 5.76E-03 | -0.52 |
| ILMN_3218292 | LOC202781    | 5.76E-03 | 0.59  |



|              |              |          |       |
|--------------|--------------|----------|-------|
| ILMN_1755974 | ALDOC        | 5.76E-03 | -0.61 |
| ILMN_1659801 | ATP6V1C1     | 5.76E-03 | 0.46  |
| ILMN_1657435 | MT1M         | 5.77E-03 | -1.57 |
| ILMN_1654639 | HERC6        | 5.87E-03 | -0.49 |
| ILMN_1722811 | CDKN1B       | 6.01E-03 | -0.38 |
| ILMN_1772964 | CCL8         | 6.07E-03 | -0.67 |
| ILMN_2405521 | MTHFD2       | 6.07E-03 | -0.67 |
| ILMN_2165867 | DHCR7        | 6.07E-03 | -0.61 |
| ILMN_1736729 | OAS2         | 6.12E-03 | -0.36 |
| ILMN_1788547 | GCLM         | 6.20E-03 | 0.50  |
| ILMN_3261439 | LOC100128098 | 6.20E-03 | 0.58  |
| ILMN_1697309 | NCF1         | 6.33E-03 | -0.69 |
| ILMN_1723846 | FAM119B      | 6.69E-03 | 0.46  |
| ILMN_1662846 | GPR160       | 6.69E-03 | -0.36 |
| ILMN_1835092 |              | 6.69E-03 | -0.59 |
| ILMN_1720373 | SLC7A5       | 6.69E-03 | -1.39 |
| ILMN_1745374 | IFI35        | 6.73E-03 | -0.58 |
| ILMN_1694780 | GCHFR        | 6.96E-03 | 0.76  |
| ILMN_1796976 | NLRC4        | 6.96E-03 | -0.36 |
| ILMN_1790689 | CRISPLD2     | 7.09E-03 | -0.45 |
| ILMN_1786429 | P2RY5        | 7.23E-03 | -0.67 |
| ILMN_1740418 | CYP27B1      | 7.23E-03 | 1.14  |
| ILMN_1784207 | C1orf128     | 7.25E-03 | 0.62  |
| ILMN_2235745 | GRIPAP1      | 7.25E-03 | 0.57  |
| ILMN_1758864 | VNN2         | 7.25E-03 | -0.77 |
| ILMN_1712532 | CARD9        | 7.42E-03 | -0.48 |
| ILMN_2211724 | C21orf24     | 7.44E-03 | 0.56  |
| ILMN_2410826 | OAS1         | 7.56E-03 | -0.59 |
| ILMN_2403237 | CHN2         | 7.69E-03 | -0.51 |
| ILMN_2408683 | PPAP2B       | 7.69E-03 | 0.62  |
| ILMN_1775170 | MT1X         | 8.32E-03 | -0.91 |
| ILMN_1733680 | AZI2         | 8.47E-03 | -0.51 |
| ILMN_1654262 | ZMAT3        | 8.58E-03 | 0.46  |
| ILMN_2113738 | C8orf45      | 8.58E-03 | 0.64  |
| ILMN_2243516 | C11orf63     | 8.58E-03 | 0.36  |
| ILMN_3187425 | LOC100127975 | 8.72E-03 | 0.42  |
| ILMN_1747347 | C17orf60     | 8.72E-03 | -0.76 |
| ILMN_1718766 | MT1F         | 8.72E-03 | -0.91 |
| ILMN_1801040 | SPN          | 8.72E-03 | 0.44  |
| ILMN_1753111 | NAMPT        | 8.72E-03 | -0.53 |
| ILMN_2370573 | XAF1         | 8.91E-03 | -0.52 |
| ILMN_2079098 | C9orf80      | 9.04E-03 | 0.44  |
| ILMN_3234997 | MAP7D1       | 9.12E-03 | 0.62  |
| ILMN_2323992 | CLEC7A       | 9.43E-03 | -0.58 |
| ILMN_1657708 | MGLL         | 9.73E-03 | 0.49  |
| ILMN_3294134 | LOC389765    | 9.73E-03 | 0.42  |

|              |           |          |       |
|--------------|-----------|----------|-------|
| ILMN_2175094 | TDRD1     | 9.73E-03 | 0.29  |
| ILMN_2195821 | C5orf41   | 9.73E-03 | -0.48 |
| ILMN_2188119 | ARL16     | 9.73E-03 | 0.58  |
| ILMN_2093343 | PLAC8     | 9.73E-03 | -0.44 |
| ILMN_1677038 | FLJ21986  | 9.73E-03 | -0.55 |
| ILMN_2197365 | RGS2      | 9.73E-03 | -0.84 |
| ILMN_2388800 | PPAP2B    | 9.73E-03 | 0.64  |
| ILMN_1669657 | LOC440345 | 9.77E-03 | 0.51  |

**Supplemental Table E2.** List of differentially expressed genes in MDMs of CF subjects exposed to 5 different M2 stimuli. FDR: false discovery rate.

| IL10         |              |          |                              |
|--------------|--------------|----------|------------------------------|
| ProbeID      | Gene Symbol  | FDR      | Log <sub>2</sub> [IL10/NoTx] |
| ILMN_1687301 | VCAN         | 5.22E-08 | 2.02                         |
| ILMN_1654389 | LOC728744    | 1.91E-07 | 1.13                         |
| ILMN_1682993 | NKG7         | 1.91E-07 | 1.42                         |
| ILMN_2176063 | FCGR1A       | 1.91E-07 | 1.71                         |
| ILMN_3247506 | FCGR1C       | 1.91E-07 | 1.53                         |
| ILMN_2261600 | FCGR1B       | 8.57E-07 | 1.88                         |
| ILMN_2391051 | FCGR1B       | 1.17E-06 | 1.64                         |
| ILMN_1746888 | PCOLCE2      | 2.56E-06 | 1.70                         |
| ILMN_1812091 | FAM20A       | 4.82E-06 | 0.92                         |
| ILMN_1784661 | TMEM2        | 9.15E-06 | 1.02                         |
| ILMN_2092118 | FPR1         | 9.21E-06 | 1.75                         |
| ILMN_3248591 | LTBP2        | 9.21E-06 | 0.71                         |
| ILMN_2348487 | EMR3         | 1.03E-05 | -1.06                        |
| ILMN_3272741 | LOC100130520 | 1.11E-05 | 2.03                         |
| ILMN_2145116 | TMEM173      | 1.37E-05 | 1.09                         |
| ILMN_1735764 | HTR2B        | 1.44E-05 | -0.76                        |
| ILMN_1671928 | PROS1        | 1.44E-05 | 0.82                         |
| ILMN_1771688 | RAB7B        | 1.44E-05 | -0.90                        |
| ILMN_2299045 | BMP2K        | 1.69E-05 | 0.68                         |
| ILMN_1655549 | SIGLEC10     | 1.69E-05 | 1.03                         |
| ILMN_1800602 | GCA          | 1.69E-05 | 0.94                         |
| ILMN_1664761 | TMEM138      | 1.69E-05 | -0.95                        |
| ILMN_2196550 | C13orf18     | 1.69E-05 | 1.08                         |
| ILMN_1653711 | FZD2         | 1.69E-05 | 0.81                         |
| ILMN_1773388 | C13orf18     | 1.84E-05 | 0.97                         |
| ILMN_2129505 | CYBASC3      | 1.96E-05 | -1.04                        |
| ILMN_1700268 | QPRT         | 2.13E-05 | -0.86                        |
| ILMN_1706498 | DSE          | 2.13E-05 | 0.94                         |
| ILMN_1759818 | SORL1        | 2.14E-05 | -0.49                        |
| ILMN_1683774 | IL2RA        | 2.14E-05 | 0.82                         |
| ILMN_1686109 | CCL23        | 2.27E-05 | 1.47                         |
| ILMN_1733270 | CD163        | 2.27E-05 | 1.70                         |
| ILMN_1669409 | VSIG4        | 2.27E-05 | 0.82                         |
| ILMN_1664094 | P2RY13       | 2.33E-05 | 0.66                         |
| ILMN_2160476 | CCL22        | 2.33E-05 | -0.62                        |
| ILMN_1801254 | LOC648984    | 2.33E-05 | 0.67                         |
| ILMN_1798204 | IL21R        | 2.44E-05 | 0.91                         |
| ILMN_1694757 | CTSL1        | 2.50E-05 | 1.07                         |
| ILMN_1764030 | CCL23        | 2.50E-05 | 1.58                         |

|              |           |          |       |
|--------------|-----------|----------|-------|
| ILMN_1703142 | 42065     | 3.36E-05 | 0.88  |
| ILMN_1711223 | LOC649362 | 3.40E-05 | 0.72  |
| ILMN_2064725 | METTTL7B  | 3.40E-05 | 1.02  |
| ILMN_2338452 | SERPINA1  | 3.47E-05 | 0.73  |
| ILMN_1751228 | C20orf46  | 3.47E-05 | 1.03  |
| ILMN_1835017 |           | 3.47E-05 | 0.66  |
| ILMN_2235851 | LINCR     | 3.47E-05 | -0.49 |
| ILMN_1805827 | PPA1      | 3.47E-05 | 1.00  |
| ILMN_1748538 | ALDH1A2   | 3.57E-05 | 1.16  |
| ILMN_1765557 | OLFML2B   | 3.72E-05 | 0.91  |
| ILMN_1680171 | MFF       | 3.72E-05 | 0.60  |
| ILMN_1775257 | PROK2     | 3.75E-05 | 0.88  |
| ILMN_1669592 | 42065     | 4.18E-05 | 0.87  |
| ILMN_3238196 | CYTH4     | 4.26E-05 | 0.94  |
| ILMN_2073289 | MTSS1     | 4.26E-05 | 0.78  |
| ILMN_2342579 | IL7R      | 4.40E-05 | 0.74  |
| ILMN_2337789 | 42065     | 4.59E-05 | 0.75  |
| ILMN_1725471 | GK        | 4.63E-05 | 1.02  |
| ILMN_2400030 | PTPN2     | 4.71E-05 | 0.76  |
| ILMN_1880983 |           | 4.82E-05 | 0.49  |
| ILMN_1687960 | LIMK2     | 4.82E-05 | 0.36  |
| ILMN_2393296 | GK        | 4.91E-05 | 1.09  |
| ILMN_1751904 | EDNRB     | 4.91E-05 | 1.04  |
| ILMN_1756992 | MUC1      | 4.92E-05 | 0.84  |
| ILMN_1654411 | CCL18     | 5.00E-05 | 1.03  |
| ILMN_1781001 | SOCS3     | 5.38E-05 | 0.97  |
| ILMN_1674183 | MT1JP     | 5.45E-05 | 0.74  |
| ILMN_2078599 | ACP5      | 5.64E-05 | -0.92 |
| ILMN_2379599 | CD163     | 5.64E-05 | 1.49  |
| ILMN_2323933 | LAIR2     | 6.32E-05 | 0.79  |
| ILMN_1762713 | C19orf59  | 6.37E-05 | 0.61  |
| ILMN_1793598 | APIP      | 6.37E-05 | 0.81  |
| ILMN_1685625 | UCP2      | 6.37E-05 | 0.76  |
| ILMN_1768812 | FXVD6     | 6.86E-05 | -0.40 |
| ILMN_1779886 | TBC1D14   | 6.93E-05 | 0.77  |
| ILMN_1757074 | GNG10     | 6.93E-05 | 1.12  |
| ILMN_1799848 | ANKRD22   | 6.93E-05 | 0.59  |
| ILMN_1723141 | OTUD1     | 7.02E-05 | 0.68  |
| ILMN_2132599 | ANKRD22   | 7.02E-05 | 0.54  |
| ILMN_1752008 | OTUD1     | 7.02E-05 | 0.46  |
| ILMN_1770768 | SLAMF1    | 7.02E-05 | 0.98  |
| ILMN_1690105 | STAT1     | 7.48E-05 | -0.92 |
| ILMN_2214678 | MXD1      | 7.48E-05 | 0.68  |
| ILMN_2227248 | SLAMF9    | 7.58E-05 | -0.64 |
| ILMN_1775708 | SLC2A3    | 7.87E-05 | 0.80  |
| ILMN_1666932 | FCGR2A    | 8.03E-05 | 0.70  |

|              |           |          |       |
|--------------|-----------|----------|-------|
| ILMN_1753111 | NAMPT     | 8.18E-05 | 1.36  |
| ILMN_1675448 | ZFP36L1   | 8.55E-05 | 0.61  |
| ILMN_1750974 | S100A9    | 9.34E-05 | 0.98  |
| ILMN_1711611 | LOC653907 | 9.36E-05 | 0.79  |
| ILMN_1715508 | NNMT      | 9.46E-05 | 0.59  |
| ILMN_2112988 | NCF1C     | 9.46E-05 | -0.69 |
| ILMN_1758673 | SLC44A1   | 9.46E-05 | -0.67 |
| ILMN_2388112 | CR1       | 9.78E-05 | 0.50  |
| ILMN_1806015 | LOC391045 | 9.78E-05 | 0.56  |
| ILMN_1668345 | OAF       | 1.04E-04 | -0.51 |
| ILMN_1767377 | LOC153561 | 1.04E-04 | 0.69  |
| ILMN_1679620 | LOC728519 | 1.04E-04 | 0.55  |
| ILMN_1657435 | MT1M      | 1.04E-04 | 0.80  |
| ILMN_1696419 | STOM      | 1.04E-04 | 1.27  |
| ILMN_1691127 | VTN       | 1.04E-04 | 0.64  |
| ILMN_2353633 | EMR2      | 1.09E-04 | 0.83  |
| ILMN_1766657 | STOM      | 1.09E-04 | 1.01  |
| ILMN_3242586 | RHOU      | 1.09E-04 | 0.76  |
| ILMN_1768284 | P2RY8     | 1.15E-04 | -0.69 |
| ILMN_2404154 | SERPINA1  | 1.16E-04 | 0.77  |
| ILMN_1733811 | JUP       | 1.23E-04 | -0.59 |
| ILMN_1711361 | ZNF319    | 1.24E-04 | 0.58  |
| ILMN_3294741 | LOC644496 | 1.35E-04 | 1.02  |
| ILMN_2381257 | DSC2      | 1.38E-04 | 0.40  |
| ILMN_1660364 | PSCD4     | 1.39E-04 | 0.91  |
| ILMN_2289849 | FCGR2A    | 1.39E-04 | 0.63  |
| ILMN_2410929 | PAPSS2    | 1.40E-04 | 0.59  |
| ILMN_1667966 | C1orf24   | 1.46E-04 | 0.82  |
| ILMN_1691364 | STAT1     | 1.53E-04 | -0.79 |
| ILMN_1663080 | LFNG      | 1.56E-04 | -0.59 |
| ILMN_1808811 | SBNO2     | 1.56E-04 | 0.43  |
| ILMN_1809467 | VAMP5     | 1.56E-04 | 0.59  |
| ILMN_2131381 | PDE3B     | 1.59E-04 | -0.36 |
| ILMN_1672589 | SEMA4B    | 1.60E-04 | 0.68  |
| ILMN_3248773 | C7orf40   | 1.62E-04 | 0.47  |
| ILMN_1671337 | SLC2A5    | 1.63E-04 | 0.72  |
| ILMN_1681301 | AIM2      | 1.63E-04 | 0.66  |
| ILMN_2328666 | CD83      | 1.63E-04 | -0.65 |
| ILMN_1786823 | ICAM2     | 1.65E-04 | -0.44 |
| ILMN_1663119 | DSC2      | 1.65E-04 | 0.68  |
| ILMN_1755643 | MGAT4A    | 1.65E-04 | 0.66  |
| ILMN_2405324 | IL28RA    | 1.66E-04 | -0.68 |
| ILMN_1804735 | CBS       | 1.66E-04 | 0.63  |
| ILMN_1774604 | PNKD      | 1.67E-04 | 0.66  |
| ILMN_1676980 | MTSS1     | 1.71E-04 | 0.56  |
| ILMN_1707591 | TNIP3     | 1.71E-04 | 0.29  |

|              |          |          |       |
|--------------|----------|----------|-------|
| ILMN_2233539 | SLC39A8  | 1.72E-04 | 0.64  |
| ILMN_1781626 | C1S      | 1.75E-04 | 0.71  |
| ILMN_1807491 | LAIR2    | 1.76E-04 | 0.84  |
| ILMN_1791726 | TUBB3    | 1.81E-04 | 0.99  |
| ILMN_1653871 | NAMPT    | 1.81E-04 | 1.44  |
| ILMN_2371911 | MUC1     | 1.83E-04 | 0.38  |
| ILMN_1722622 | CD163    | 1.84E-04 | 1.47  |
| ILMN_1692295 | MYO1G    | 1.95E-04 | 0.73  |
| ILMN_1713505 | NPC1     | 1.95E-04 | 0.70  |
| ILMN_1680738 | C5orf13  | 2.05E-04 | 0.42  |
| ILMN_1740418 | CYP27B1  | 2.05E-04 | 1.04  |
| ILMN_2392569 | FPR2     | 2.08E-04 | 0.51  |
| ILMN_2296036 | PTPN2    | 2.08E-04 | 0.56  |
| ILMN_1780799 | ENPP2    | 2.14E-04 | 1.34  |
| ILMN_1747347 | C17orf60 | 2.22E-04 | 0.89  |
| ILMN_2373791 | ENPP2    | 2.22E-04 | 1.46  |
| ILMN_3249748 | LDHA     | 2.22E-04 | 0.49  |
| ILMN_1666444 | RBMS1    | 2.22E-04 | 0.71  |
| ILMN_2212763 | ICAM3    | 2.25E-04 | -0.43 |
| ILMN_1666733 | IL8      | 2.34E-04 | -0.65 |
| ILMN_1660624 | LIMK2    | 2.38E-04 | 0.38  |
| ILMN_1735930 | KLF2     | 2.39E-04 | 0.75  |
| ILMN_1764723 | SH3PXD2B | 2.57E-04 | 0.55  |
| ILMN_1741957 | RABEPK   | 2.80E-04 | 0.58  |
| ILMN_2382942 | CA12     | 2.81E-04 | 0.57  |
| ILMN_1680618 | MYC      | 2.83E-04 | 0.63  |
| ILMN_1800091 | RARRES1  | 2.83E-04 | 1.03  |
| ILMN_1720998 | CA12     | 2.86E-04 | 1.60  |
| ILMN_1652185 | IL4R     | 2.86E-04 | 0.56  |
| ILMN_1784884 | LILRB3   | 2.86E-04 | 0.59  |
| ILMN_1759513 | RND3     | 2.97E-04 | 0.76  |
| ILMN_1761199 | SLCO2B1  | 2.98E-04 | 0.51  |
| ILMN_1695316 | SLC39A8  | 2.98E-04 | 0.82  |
| ILMN_1694780 | GCHFR    | 3.03E-04 | -0.60 |
| ILMN_1700695 | SLC44A1  | 3.05E-04 | -0.55 |
| ILMN_2348788 | CD44     | 3.11E-04 | 0.65  |
| ILMN_1732538 | LBP      | 3.11E-04 | 0.61  |
| ILMN_1660086 | MYH11    | 3.11E-04 | 1.02  |
| ILMN_1768469 | TCN1     | 3.14E-04 | 0.51  |
| ILMN_1744138 | CHCHD7   | 3.14E-04 | 0.51  |
| ILMN_2106725 | NCF1B    | 3.15E-04 | -0.31 |
| ILMN_1656057 | PLAU     | 3.22E-04 | 0.49  |
| ILMN_1660544 | ARRDC4   | 3.23E-04 | 0.39  |
| ILMN_2087656 | SLCO2B1  | 3.23E-04 | 0.51  |
| ILMN_2410038 | FAM111A  | 3.25E-04 | -0.55 |
| ILMN_2289593 | FXVD2    | 3.29E-04 | -0.58 |

|              |              |          |       |
|--------------|--------------|----------|-------|
| ILMN_1816603 |              | 3.51E-04 | 0.38  |
| ILMN_1773963 | GNA15        | 3.55E-04 | 0.67  |
| ILMN_1733758 | MT1B         | 3.57E-04 | 0.53  |
| ILMN_2136089 | MTE          | 3.57E-04 | 0.59  |
| ILMN_1691341 | IL7R         | 3.64E-04 | 0.77  |
| ILMN_1670490 | PDPN         | 3.64E-04 | 0.82  |
| ILMN_1695829 | TTYH2        | 3.68E-04 | -0.40 |
| ILMN_1763386 | BID          | 3.69E-04 | -0.58 |
| ILMN_1681101 | 42064        | 3.69E-04 | 0.70  |
| ILMN_2367671 | LIMK2        | 3.74E-04 | 0.31  |
| ILMN_1737314 | BCL6         | 3.80E-04 | 0.64  |
| ILMN_1898124 |              | 3.81E-04 | 0.45  |
| ILMN_1668063 | FCN1         | 4.19E-04 | -0.99 |
| ILMN_1662640 | C20orf127    | 4.19E-04 | 0.53  |
| ILMN_1653496 | GLUL         | 4.62E-04 | 0.56  |
| ILMN_2389810 | ATP11C       | 4.66E-04 | 0.39  |
| ILMN_1748883 | CDKN2D       | 4.69E-04 | 0.36  |
| ILMN_2121816 | GPR137B      | 4.86E-04 | 0.50  |
| ILMN_1715273 | PICALM       | 4.87E-04 | 0.53  |
| ILMN_2144088 | FDFT1        | 4.87E-04 | -0.49 |
| ILMN_1697309 | NCF1         | 4.87E-04 | -0.70 |
| ILMN_1657871 | RSAD2        | 4.87E-04 | -0.73 |
| ILMN_3182768 | LOC100130520 | 4.91E-04 | 0.71  |
| ILMN_1797875 | ALOX5AP      | 4.92E-04 | -0.91 |
| ILMN_2358540 | RBMS1        | 4.97E-04 | 0.77  |
| ILMN_1669881 | TSPAN13      | 5.03E-04 | 0.41  |
| ILMN_1713759 | UBE2J1       | 5.03E-04 | 0.63  |
| ILMN_1718303 | PVRL2        | 5.14E-04 | 0.55  |
| ILMN_2329914 | SPRY1        | 5.34E-04 | 0.48  |
| ILMN_3260618 | LOC100128086 | 5.54E-04 | 0.62  |
| ILMN_1910120 | LOC730092    | 5.54E-04 | -0.39 |
| ILMN_2060115 | SORL1        | 5.54E-04 | -0.44 |
| ILMN_2326273 | CHI3L2       | 5.66E-04 | 1.06  |
| ILMN_1790689 | CRISPLD2     | 5.85E-04 | -0.55 |
| ILMN_2229969 | ERO1LB       | 5.85E-04 | 0.27  |
| ILMN_1771385 | GBP4         | 5.85E-04 | -0.56 |
| ILMN_1745607 | A2M          | 5.85E-04 | -0.60 |
| ILMN_1727689 | TNFAIP2      | 5.99E-04 | -0.38 |
| ILMN_1748206 | C20orf160    | 5.99E-04 | 0.19  |
| ILMN_1718621 | TSPAN32      | 6.04E-04 | -0.82 |
| ILMN_1653652 | PTPRC        | 6.11E-04 | 0.51  |
| ILMN_1712112 | RCAN1        | 6.15E-04 | 0.74  |
| ILMN_1729188 | HAMP         | 6.23E-04 | 0.55  |
| ILMN_1670322 | FCHO2        | 6.45E-04 | 0.44  |
| ILMN_3244550 | LOC642413    | 6.58E-04 | 0.54  |
| ILMN_2094942 | 42064        | 6.58E-04 | 0.61  |

|              |           |          |       |
|--------------|-----------|----------|-------|
| ILMN_1800739 | SPINT2    | 6.59E-04 | 0.50  |
| ILMN_1722158 | CASP5     | 6.59E-04 | 0.60  |
| ILMN_2393149 | ALOX15B   | 6.64E-04 | -0.47 |
| ILMN_1806165 | HSPA6     | 6.64E-04 | 0.46  |
| ILMN_1743933 | TSHZ3     | 6.64E-04 | 0.49  |
| ILMN_1769388 | GJB2      | 6.64E-04 | 0.52  |
| ILMN_1768598 | LAIR1     | 6.64E-04 | 0.73  |
| ILMN_1791576 | CHSY1     | 6.64E-04 | 1.01  |
| ILMN_1796537 | FYB       | 6.64E-04 | 0.50  |
| ILMN_3235853 | S1PR1     | 6.65E-04 | 0.36  |
| ILMN_1784630 | KBTBD11   | 6.68E-04 | 0.31  |
| ILMN_1710514 | BCL3      | 6.68E-04 | 0.83  |
| ILMN_2401978 | STAT3     | 6.68E-04 | 0.53  |
| ILMN_1719606 | LOC644762 | 6.77E-04 | 0.49  |
| ILMN_1771599 | PLOD2     | 6.77E-04 | 0.79  |
| ILMN_1815023 | PIM1      | 6.84E-04 | 0.99  |
| ILMN_1738992 | MNDA      | 6.90E-04 | 0.64  |
| ILMN_1726913 | RBPJ      | 6.90E-04 | 0.17  |
| ILMN_1784749 | GAS6      | 6.95E-04 | 0.59  |
| ILMN_1690566 | RASSF4    | 6.95E-04 | 0.55  |
| ILMN_1741171 | TM2D2     | 6.95E-04 | 0.54  |
| ILMN_1799467 | SAMD9L    | 6.95E-04 | -0.56 |
| ILMN_1715131 | CCR7      | 6.95E-04 | -0.63 |
| ILMN_1688775 | METRNL    | 6.95E-04 | 0.65  |
| ILMN_1729749 | HERC5     | 6.98E-04 | -0.67 |
| ILMN_1749521 | SLC35E3   | 7.08E-04 | -0.65 |
| ILMN_1775937 | DDB1      | 7.12E-04 | -0.47 |
| ILMN_1652003 | GNG10     | 7.12E-04 | 0.78  |
| ILMN_1676361 | ARHGAP22  | 7.13E-04 | -0.39 |
| ILMN_1798971 | FZD5      | 7.16E-04 | 0.46  |
| ILMN_3232894 | CNRIP1    | 7.18E-04 | 0.54  |
| ILMN_1740015 | CD14      | 7.19E-04 | 0.60  |
| ILMN_2376108 | PSMB9     | 7.20E-04 | -0.38 |
| ILMN_1693771 | ASPH      | 7.39E-04 | 0.53  |
| ILMN_1689160 | DPEP2     | 7.55E-04 | -0.45 |
| ILMN_1705769 | IL7       | 7.56E-04 | 0.59  |
| ILMN_1671509 | CCL3      | 7.79E-04 | 1.01  |
| ILMN_1713807 | MAN1C1    | 7.85E-04 | 0.52  |
| ILMN_1651498 | GADD45G   | 7.85E-04 | -0.50 |
| ILMN_1812278 | LY9       | 8.25E-04 | -0.42 |
| ILMN_1756862 | APOL3     | 8.25E-04 | -0.44 |
| ILMN_2355168 | MGST1     | 8.32E-04 | -0.46 |
| ILMN_2365465 | XBP1      | 8.68E-04 | 0.61  |
| ILMN_2373831 | BTN3A3    | 8.68E-04 | -0.35 |
| ILMN_1713668 | TSNAX     | 8.68E-04 | 0.54  |
| ILMN_1806293 | LIN7A     | 8.71E-04 | 0.19  |



|              |           |          |       |
|--------------|-----------|----------|-------|
| ILMN_1766896 | ZDHC19    | 8.71E-04 | 0.67  |
| ILMN_1742601 | CR1       | 8.75E-04 | 0.47  |
| ILMN_1719695 | NFKBIZ    | 8.77E-04 | 0.73  |
| ILMN_1747197 | SLC41A2   | 8.77E-04 | 0.62  |
| ILMN_1695290 | FERMT2    | 8.77E-04 | 0.32  |
| ILMN_1787509 | PRIC285   | 8.89E-04 | -0.48 |
| ILMN_1656938 | LOC731486 | 9.04E-04 | -0.72 |
| ILMN_1751464 | TNFSF9    | 9.04E-04 | -0.38 |
| ILMN_2112524 | RNF149    | 9.04E-04 | 0.47  |
| ILMN_1764228 | DAB2      | 9.08E-04 | 0.52  |
| ILMN_3246065 | CCDC151   | 9.28E-04 | 0.31  |
| ILMN_3200140 | LOC645638 | 9.39E-04 | -0.72 |
| ILMN_1802251 | PTTG1IP   | 9.51E-04 | 0.53  |
| ILMN_2148819 | TUBA1A    | 9.51E-04 | 0.49  |
| ILMN_1653319 | MC1R      | 9.55E-04 | 0.42  |
| ILMN_1853167 |           | 9.69E-04 | 0.53  |
| ILMN_1755873 | EMR3      | 9.96E-04 | -0.36 |
| ILMN_1819494 |           | 1.00E-03 | 0.31  |
| ILMN_1688580 | CAMP      | 1.02E-03 | -0.39 |
| ILMN_1730628 | RNASE2    | 1.03E-03 | 0.67  |
| ILMN_2367239 | RCAN1     | 1.03E-03 | 0.49  |
| ILMN_2086470 | PDGFRA    | 1.03E-03 | 0.25  |
| ILMN_2320888 | CXCR4     | 1.03E-03 | -0.55 |
| ILMN_1659913 | ISG20     | 1.04E-03 | -0.74 |
| ILMN_1776121 | MGC42367  | 1.04E-03 | 0.36  |
| ILMN_1767193 | CR1       | 1.05E-03 | 0.17  |
| ILMN_1716105 | NLRP12    | 1.05E-03 | 0.42  |
| ILMN_1729801 | S100A8    | 1.06E-03 | 0.81  |
| ILMN_1814998 | FKSG30    | 1.07E-03 | 0.45  |
| ILMN_1777325 | STAT1     | 1.07E-03 | -0.63 |
| ILMN_1700515 | C17orf58  | 1.08E-03 | 0.51  |
| ILMN_2234697 | BEX1      | 1.09E-03 | -0.98 |
| ILMN_2186061 | PFKFB3    | 1.09E-03 | 0.94  |
| ILMN_1733288 | C1RL      | 1.09E-03 | 0.64  |
| ILMN_1760247 | CD70      | 1.10E-03 | -0.38 |
| ILMN_1742167 | TUBA1C    | 1.10E-03 | 0.64  |
| ILMN_1701789 | IFIT3     | 1.11E-03 | -0.62 |
| ILMN_3295494 | LOC389386 | 1.11E-03 | 0.58  |
| ILMN_1731714 | CREB5     | 1.12E-03 | 0.45  |
| ILMN_1662973 | CD82      | 1.13E-03 | 0.43  |
| ILMN_1759374 | LOC440132 | 1.15E-03 | 0.20  |
| ILMN_1743620 | RARRES1   | 1.16E-03 | 0.91  |
| ILMN_1658639 | SLC46A3   | 1.17E-03 | 0.47  |
| ILMN_1684368 | C5orf62   | 1.17E-03 | 0.48  |
| ILMN_1652680 | LOC652616 | 1.17E-03 | -0.44 |
| ILMN_1674789 | LOC651738 | 1.17E-03 | 0.42  |

|              |              |          |       |
|--------------|--------------|----------|-------|
| ILMN_1710495 | PAPLN        | 1.18E-03 | -0.52 |
| ILMN_1723962 | LXN          | 1.18E-03 | 0.64  |
| ILMN_1714167 | CYB5A        | 1.18E-03 | -0.49 |
| ILMN_1679809 | GSTP1        | 1.22E-03 | -0.44 |
| ILMN_2262044 | PARP10       | 1.22E-03 | -0.49 |
| ILMN_1770085 | BTG2         | 1.23E-03 | 0.47  |
| ILMN_2086077 | JUNB         | 1.25E-03 | 0.41  |
| ILMN_2258004 | METRNL       | 1.25E-03 | 0.22  |
| ILMN_1761281 | LOC441019    | 1.28E-03 | 0.56  |
| ILMN_3209232 | LOC644496    | 1.29E-03 | 0.40  |
| ILMN_1781388 | PGM5         | 1.29E-03 | -0.39 |
| ILMN_1778845 | FAM111A      | 1.29E-03 | -0.37 |
| ILMN_1775380 | SMOX         | 1.29E-03 | 0.57  |
| ILMN_1718977 | GADD45B      | 1.31E-03 | 0.32  |
| ILMN_1799106 | MOSC1        | 1.31E-03 | -0.44 |
| ILMN_1731589 | PTPRJ        | 1.31E-03 | 0.31  |
| ILMN_2368292 | TSEN34       | 1.31E-03 | 0.52  |
| ILMN_1656837 | RBP1         | 1.31E-03 | -0.42 |
| ILMN_1663618 | STAT3        | 1.34E-03 | 0.58  |
| ILMN_2150258 | ZFP36L2      | 1.35E-03 | -0.39 |
| ILMN_1679797 | ADARB1       | 1.35E-03 | 0.49  |
| ILMN_2408572 | RNASE4       | 1.35E-03 | -0.33 |
| ILMN_2398572 | FXVD2        | 1.42E-03 | -0.30 |
| ILMN_1671731 | AVPI1        | 1.46E-03 | -0.51 |
| ILMN_1801610 | METRNL       | 1.46E-03 | 0.44  |
| ILMN_1702009 | SV2A         | 1.47E-03 | 0.16  |
| ILMN_1712708 | TRIM47       | 1.47E-03 | 0.32  |
| ILMN_1811624 | THADA        | 1.49E-03 | -0.34 |
| ILMN_2367753 | ATP2B4       | 1.50E-03 | 0.51  |
| ILMN_2152257 | SSTR2        | 1.51E-03 | 0.35  |
| ILMN_1814200 | BMP2K        | 1.51E-03 | 0.38  |
| ILMN_3238814 | LOC100170939 | 1.51E-03 | 0.49  |
| ILMN_2404385 | REPIN1       | 1.56E-03 | -0.44 |
| ILMN_1718046 | ARNT2        | 1.56E-03 | 0.54  |
| ILMN_1678422 | DHX58        | 1.58E-03 | -0.38 |
| ILMN_1720270 | CDR2         | 1.58E-03 | -0.37 |
| ILMN_1654560 | TLR6         | 1.59E-03 | 0.61  |
| ILMN_3234142 | LOC728855    | 1.59E-03 | 0.45  |
| ILMN_1708537 | RBPJ         | 1.59E-03 | 0.47  |
| ILMN_1660847 | PFKFB3       | 1.60E-03 | 0.68  |
| ILMN_1752728 | FUCA1        | 1.60E-03 | -0.45 |
| ILMN_1665865 | IGFBP4       | 1.61E-03 | 0.52  |
| ILMN_1704369 | LIMA1        | 1.61E-03 | 0.39  |
| ILMN_2383707 | ALDH1A2      | 1.61E-03 | 0.42  |
| ILMN_1769520 | UBE2L6       | 1.63E-03 | -0.47 |
| ILMN_1719205 | FBL          | 1.63E-03 | -0.36 |

|              |                   |          |       |
|--------------|-------------------|----------|-------|
| ILMN_1712985 | C17orf58          | 1.63E-03 | 0.42  |
| ILMN_1674063 | OAS2              | 1.63E-03 | -0.63 |
| ILMN_2239754 | IFIT3             | 1.65E-03 | -0.65 |
| ILMN_1715068 | AQP9              | 1.67E-03 | 0.44  |
| ILMN_2363058 | PAOX              | 1.68E-03 | -0.36 |
| ILMN_1767809 | DNAJC25-<br>GNG10 | 1.70E-03 | 0.58  |
| ILMN_2404625 | LAT               | 1.70E-03 | -0.46 |
| ILMN_1679826 | CST7              | 1.71E-03 | -0.34 |
| ILMN_1803256 | STOX2             | 1.71E-03 | -0.34 |
| ILMN_1812552 | PHCA              | 1.73E-03 | 0.38  |
| ILMN_1728742 | C5orf4            | 1.79E-03 | -0.32 |
| ILMN_3259146 | LOC100129681      | 1.84E-03 | -0.44 |
| ILMN_2170814 | LAMP3             | 1.84E-03 | -0.54 |
| ILMN_1691539 | LAT               | 1.85E-03 | -0.50 |
| ILMN_1711608 | SSBP2             | 1.88E-03 | 0.47  |
| ILMN_1745397 | OAS3              | 1.88E-03 | -0.59 |
| ILMN_1703108 | UBE2L6            | 1.88E-03 | -0.52 |
| ILMN_1779558 | GAS6              | 1.89E-03 | 0.65  |
| ILMN_1738116 | TMEM119           | 1.91E-03 | -0.54 |
| ILMN_1672834 | SSH2              | 1.92E-03 | 0.41  |
| ILMN_1776327 | LOC727820         | 1.97E-03 | -0.24 |
| ILMN_1685005 | TNFRSF1A          | 1.97E-03 | 0.43  |
| ILMN_1686862 | HLX               | 1.97E-03 | 0.31  |
| ILMN_1804663 | THBS3             | 1.97E-03 | 0.44  |
| ILMN_1784863 | CD36              | 1.97E-03 | 0.54  |
| ILMN_1739428 | IFIT2             | 2.01E-03 | -0.60 |
| ILMN_1695432 | TPST2             | 2.01E-03 | 0.48  |
| ILMN_3215715 | LOC389386         | 2.05E-03 | 0.57  |
| ILMN_2376403 | TSC22D3           | 2.05E-03 | 0.42  |
| ILMN_1665877 | RNF149            | 2.05E-03 | 0.55  |
| ILMN_1781373 | IFIH1             | 2.06E-03 | -0.49 |
| ILMN_1683792 | LAP3              | 2.07E-03 | 0.57  |
| ILMN_1701731 | AKR1B1            | 2.08E-03 | -0.46 |
| ILMN_1748915 | S100A12           | 2.10E-03 | 0.42  |
| ILMN_2093343 | PLAC8             | 2.11E-03 | -0.81 |
| ILMN_1653504 | EDG1              | 2.11E-03 | 0.31  |
| ILMN_1739222 | ETV5              | 2.11E-03 | 0.47  |
| ILMN_2110908 | MYC               | 2.12E-03 | 0.34  |
| ILMN_1707727 | ANGPTL4           | 2.14E-03 | 0.49  |
| ILMN_1810420 | DYSF              | 2.18E-03 | 0.58  |
| ILMN_2184373 | IL8               | 2.18E-03 | -0.46 |
| ILMN_1706434 | LOC440359         | 2.20E-03 | 0.51  |
| ILMN_1685122 | COL9A2            | 2.20E-03 | -0.24 |
| ILMN_1749006 | RCSN1             | 2.20E-03 | -0.40 |
| ILMN_2358541 | RBMS1             | 2.22E-03 | 0.48  |

|              |           |          |       |
|--------------|-----------|----------|-------|
| ILMN_1804277 | SPRED1    | 2.24E-03 | 0.42  |
| ILMN_1683923 | MT1H      | 2.26E-03 | 0.48  |
| ILMN_1668865 | SLC2A14   | 2.30E-03 | 0.37  |
| ILMN_1812384 | NR3C1     | 2.30E-03 | 0.38  |
| ILMN_2204876 | FLVCR2    | 2.31E-03 | 0.53  |
| ILMN_1656011 | RGS1      | 2.37E-03 | -0.43 |
| ILMN_1707695 | IFIT1     | 2.37E-03 | -0.60 |
| ILMN_1675640 | OAS1      | 2.37E-03 | -0.45 |
| ILMN_1768181 | TOR3A     | 2.37E-03 | -0.40 |
| ILMN_1748093 | PAFAH1B3  | 2.39E-03 | 0.36  |
| ILMN_1728799 | FBP1      | 2.41E-03 | -0.47 |
| ILMN_1791511 | TMEM176A  | 2.42E-03 | 0.62  |
| ILMN_1788416 | FAM108C1  | 2.45E-03 | 0.76  |
| ILMN_2312194 | CYB5A     | 2.45E-03 | -0.40 |
| ILMN_1791771 | HCK       | 2.45E-03 | 0.53  |
| ILMN_1723004 | CD72      | 2.45E-03 | 0.34  |
| ILMN_2312606 | IRF5      | 2.47E-03 | -0.43 |
| ILMN_1710962 | TMEM97    | 2.52E-03 | -0.26 |
| ILMN_1712088 | CLYBL     | 2.53E-03 | -0.30 |
| ILMN_1808979 | CLEC4D    | 2.60E-03 | 0.40  |
| ILMN_1804396 | C14orf4   | 2.60E-03 | 0.46  |
| ILMN_1755732 | ARMC9     | 2.62E-03 | -0.28 |
| ILMN_1803317 | C9orf114  | 2.63E-03 | -0.34 |
| ILMN_2105573 | CCL3L3    | 2.63E-03 | 0.86  |
| ILMN_2383871 | ZNF74     | 2.63E-03 | -0.18 |
| ILMN_1662328 | CNNM3     | 2.63E-03 | -0.29 |
| ILMN_1655884 | ATP2A2    | 2.64E-03 | 0.49  |
| ILMN_1780861 | LOC653506 | 2.69E-03 | 0.53  |
| ILMN_2375879 | VEGFA     | 2.69E-03 | 0.33  |
| ILMN_1751851 | CECR1     | 2.72E-03 | -0.55 |
| ILMN_3239965 | IDO1      | 2.73E-03 | -0.48 |
| ILMN_1786444 | LPL       | 2.73E-03 | -0.37 |
| ILMN_1661537 | LEPROT    | 2.73E-03 | 0.45  |
| ILMN_2296037 | PTPN2     | 2.76E-03 | 0.24  |
| ILMN_1697567 | TPM3      | 2.77E-03 | 0.50  |
| ILMN_1785852 | OBFC2A    | 2.78E-03 | 0.43  |
| ILMN_1675656 | PPFIBP2   | 2.79E-03 | -0.50 |
| ILMN_1727045 | RASGRP3   | 2.82E-03 | -0.46 |
| ILMN_2331121 | FCGR2C    | 2.82E-03 | 0.17  |
| ILMN_1760189 | NAIP      | 2.84E-03 | 0.31  |
| ILMN_3224856 | LOC729660 | 2.86E-03 | 0.60  |
| ILMN_1810725 | FAM129A   | 2.86E-03 | 0.61  |
| ILMN_1736939 | UGCG      | 2.86E-03 | 0.53  |
| ILMN_1678353 | FARP1     | 2.87E-03 | -0.31 |
| ILMN_1751079 | TAP1      | 2.87E-03 | -0.47 |
| ILMN_1747355 | CCL3L1    | 2.87E-03 | 0.94  |

|              |           |          |       |
|--------------|-----------|----------|-------|
| ILMN_1696974 | ANG       | 2.87E-03 | -0.41 |
| ILMN_1794612 | UBA7      | 2.88E-03 | -0.46 |
| ILMN_1811148 | BMP2K     | 2.88E-03 | 0.42  |
| ILMN_1681296 | ICAM4     | 2.95E-03 | -0.17 |
| ILMN_2415421 | SLC30A2   | 2.96E-03 | 0.21  |
| ILMN_1772387 | TLR2      | 2.98E-03 | 0.23  |
| ILMN_1800898 | ARG2      | 3.01E-03 | 0.39  |
| ILMN_1657455 | CEACAM4   | 3.10E-03 | 0.17  |
| ILMN_1697925 | APOB48R   | 3.10E-03 | -0.32 |
| ILMN_1712545 | S100A3    | 3.13E-03 | 0.23  |
| ILMN_1761912 | MGAT1     | 3.13E-03 | -0.39 |
| ILMN_1705848 | FAM104B   | 3.15E-03 | -0.56 |
| ILMN_3231621 | LOC730235 | 3.16E-03 | 0.52  |
| ILMN_1777519 | ITGB7     | 3.17E-03 | -0.48 |
| ILMN_1798006 | ANKRD35   | 3.17E-03 | 0.39  |
| ILMN_2044453 | LPAR5     | 3.17E-03 | 0.33  |
| ILMN_1687533 | SEMA4D    | 3.17E-03 | -0.43 |
| ILMN_1726114 | SLC45A3   | 3.18E-03 | -0.24 |
| ILMN_1807106 | LDHA      | 3.22E-03 | 0.54  |
| ILMN_2260082 | NAIP      | 3.22E-03 | 0.33  |
| ILMN_1775448 | PFN2      | 3.22E-03 | 0.21  |
| ILMN_1726624 | YPEL4     | 3.29E-03 | -0.39 |
| ILMN_1792497 | HRB       | 3.30E-03 | 0.46  |
| ILMN_1746408 | MIDN      | 3.31E-03 | 0.39  |
| ILMN_1727466 | KCNMB4    | 3.34E-03 | 0.52  |
| ILMN_2342066 | METRNL    | 3.37E-03 | 0.37  |
| ILMN_2134974 | RAB38     | 3.38E-03 | -0.33 |
| ILMN_2331082 | MS4A7     | 3.41E-03 | -0.53 |
| ILMN_2054019 | ISG15     | 3.42E-03 | -0.66 |
| ILMN_1658926 | NOTCH3    | 3.42E-03 | -0.26 |
| ILMN_3250899 | SULT1A3   | 3.42E-03 | 0.17  |
| ILMN_1764769 | VWA5A     | 3.43E-03 | 0.37  |
| ILMN_1693338 | CYP1B1    | 3.43E-03 | 0.55  |
| ILMN_1757343 | PABPC4    | 3.44E-03 | -0.38 |
| ILMN_1690921 | STAT2     | 3.44E-03 | -0.54 |
| ILMN_1668822 | BATF      | 3.44E-03 | 0.31  |
| ILMN_1730032 | BOK       | 3.44E-03 | -0.41 |
| ILMN_3260345 | AGFG1     | 3.44E-03 | 0.35  |
| ILMN_1772692 | DICER1    | 3.47E-03 | 0.45  |
| ILMN_1808634 | TMEM77    | 3.53E-03 | 0.33  |
| ILMN_1678454 | CASP4     | 3.53E-03 | 0.54  |
| ILMN_1799890 | ZFYVE20   | 3.54E-03 | 0.39  |
| ILMN_1731287 | ARFGAP3   | 3.55E-03 | 0.36  |
| ILMN_1748124 | TSC22D3   | 3.58E-03 | 0.44  |
| ILMN_1804812 | ANAPC1    | 3.63E-03 | -0.30 |
| ILMN_1656310 | INDO      | 3.64E-03 | -0.51 |

|              |           |          |       |
|--------------|-----------|----------|-------|
| ILMN_1798249 | AK3L1     | 3.71E-03 | 0.29  |
| ILMN_1792922 | SOD2      | 3.72E-03 | 0.31  |
| ILMN_1811616 | EEDP1     | 3.73E-03 | -0.30 |
| ILMN_1693452 | GAL3ST4   | 3.84E-03 | 0.48  |
| ILMN_1804117 | FAM89B    | 3.85E-03 | 0.42  |
| ILMN_1788783 | TRAM2     | 3.87E-03 | 0.28  |
| ILMN_1744968 | KCNAB1    | 3.90E-03 | -0.30 |
| ILMN_1716859 | TDO2      | 3.91E-03 | 1.16  |
| ILMN_1775703 | TRAPPC6A  | 3.94E-03 | -0.31 |
| ILMN_2159272 | PDCD1LG2  | 3.95E-03 | 0.37  |
| ILMN_2339955 | NR4A2     | 3.95E-03 | -0.20 |
| ILMN_1693630 | C16orf7   | 3.97E-03 | 0.31  |
| ILMN_1723260 | ETV5      | 4.09E-03 | 0.38  |
| ILMN_1666453 | STK3      | 4.10E-03 | 0.36  |
| ILMN_1719627 | SLC27A3   | 4.11E-03 | -0.40 |
| ILMN_1795342 | MLPH      | 4.11E-03 | -0.31 |
| ILMN_2358626 | ADK       | 4.14E-03 | -0.39 |
| ILMN_2399140 | RAB5C     | 4.15E-03 | 0.30  |
| ILMN_1716687 | TPM1      | 4.15E-03 | 0.28  |
| ILMN_2087646 | HLX       | 4.19E-03 | 0.54  |
| ILMN_1667748 | ANKRD33   | 4.21E-03 | -0.39 |
| ILMN_1721106 | C14orf159 | 4.26E-03 | -0.51 |
| ILMN_1792473 | AIF1      | 4.26E-03 | 0.41  |
| ILMN_1662358 | MX1       | 4.26E-03 | -0.39 |
| ILMN_2352934 | ASPH      | 4.27E-03 | 0.34  |
| ILMN_1751425 | ERMP1     | 4.34E-03 | -0.35 |
| ILMN_1797950 | EXTL2     | 4.39E-03 | -0.25 |
| ILMN_3242540 | CD163L1   | 4.39E-03 | 0.21  |
| ILMN_1720604 | ARSG      | 4.40E-03 | -0.22 |
| ILMN_2278433 | LOC285074 | 4.40E-03 | -0.35 |
| ILMN_1745779 | TCTEX1D2  | 4.40E-03 | 0.19  |
| ILMN_1720771 | STX11     | 4.40E-03 | -0.41 |
| ILMN_2398926 | C17orf58  | 4.40E-03 | 0.61  |
| ILMN_3300744 | LOC728666 | 4.40E-03 | 0.40  |
| ILMN_1667460 | SULF2     | 4.42E-03 | -0.26 |
| ILMN_2198408 | MFF       | 4.42E-03 | 0.51  |
| ILMN_1796094 | CD36      | 4.44E-03 | 0.59  |
| ILMN_1691616 | LOC727935 | 4.53E-03 | 0.33  |
| ILMN_2085012 | TMEM176B  | 4.58E-03 | 0.32  |
| ILMN_1699331 | IFIT1     | 4.58E-03 | -0.34 |
| ILMN_1683023 | PDGFC     | 4.59E-03 | -0.30 |
| ILMN_1770787 | DDAH2     | 4.63E-03 | 0.36  |
| ILMN_1680805 | IL28RA    | 4.63E-03 | -0.25 |
| ILMN_1718766 | MT1F      | 4.64E-03 | 0.39  |
| ILMN_1719986 | PIK3IP1   | 4.64E-03 | -0.34 |
| ILMN_1731503 | MARCO     | 4.69E-03 | 0.84  |

|              |              |          |       |
|--------------|--------------|----------|-------|
| ILMN_2329679 | TPST2        | 4.72E-03 | 0.37  |
| ILMN_1916137 |              | 4.72E-03 | -0.12 |
| ILMN_1867664 | SPTLC3       | 4.72E-03 | 0.21  |
| ILMN_2331231 | TNFRSF6B     | 4.77E-03 | 0.29  |
| ILMN_2124221 | CLLU1OS      | 4.85E-03 | -0.51 |
| ILMN_1741881 | C9orf72      | 4.88E-03 | 0.34  |
| ILMN_1692651 | PHB          | 4.89E-03 | -0.35 |
| ILMN_2372413 | BID          | 4.93E-03 | -0.37 |
| ILMN_1814305 | SAMD9        | 4.93E-03 | -0.53 |
| ILMN_1700143 | FRMD4B       | 4.95E-03 | 0.28  |
| ILMN_1751072 | SRPRB        | 4.99E-03 | -0.29 |
| ILMN_3284119 | LOC399804    | 4.99E-03 | -0.34 |
| ILMN_1722834 | RGS12        | 4.99E-03 | -0.56 |
| ILMN_1658706 | ST6GALNAC2   | 5.06E-03 | -0.37 |
| ILMN_3223317 | LOC728666    | 5.14E-03 | 0.35  |
| ILMN_1736929 | PLB1         | 5.20E-03 | 0.15  |
| ILMN_2389151 | UGP2         | 5.20E-03 | 0.35  |
| ILMN_1811719 | MYO7A        | 5.45E-03 | 0.29  |
| ILMN_1667893 | TNS3         | 5.45E-03 | 0.37  |
| ILMN_1762167 | GTDC1        | 5.45E-03 | 0.27  |
| ILMN_1755658 | ABI3         | 5.51E-03 | -0.35 |
| ILMN_1786612 | PSME2        | 5.55E-03 | -0.39 |
| ILMN_1740466 | FAM46A       | 5.62E-03 | -0.45 |
| ILMN_2402341 | MAPK3        | 5.62E-03 | 0.33  |
| ILMN_1670353 | RAD51AP1     | 5.64E-03 | -0.39 |
| ILMN_1745021 | SLC30A1      | 5.70E-03 | 0.37  |
| ILMN_1682996 | VWA5A        | 5.71E-03 | 0.34  |
| ILMN_1669550 | MAD2L2       | 5.71E-03 | 0.38  |
| ILMN_1781045 | FXVD2        | 5.72E-03 | -0.30 |
| ILMN_1794803 | NDP          | 5.75E-03 | 1.36  |
| ILMN_1799889 | ATP6V0D2     | 5.85E-03 | -0.56 |
| ILMN_1713934 | LITAF        | 5.85E-03 | 0.48  |
| ILMN_1748751 | NLF2         | 5.90E-03 | 0.74  |
| ILMN_1721626 | ARID5B       | 5.91E-03 | 0.43  |
| ILMN_1778709 | PICALM       | 5.94E-03 | 0.24  |
| ILMN_2055156 | PAG1         | 5.94E-03 | 0.38  |
| ILMN_3256478 | LOC100129034 | 6.03E-03 | 0.41  |
| ILMN_1743570 | CEACAM3      | 6.03E-03 | 0.38  |
| ILMN_1809866 | WDR74        | 6.05E-03 | -0.30 |
| ILMN_1727524 | ADAM9        | 6.08E-03 | 0.36  |
| ILMN_1776777 | ADAR         | 6.08E-03 | -0.45 |
| ILMN_1723158 | NOP2         | 6.11E-03 | -0.33 |
| ILMN_1756541 | MXD4         | 6.33E-03 | -0.39 |
| ILMN_2101278 | RGS18        | 6.36E-03 | 0.34  |
| ILMN_1677827 | TLR7         | 6.49E-03 | 0.30  |
| ILMN_3306730 | RBM47        | 6.49E-03 | 0.37  |

|              |              |          |       |
|--------------|--------------|----------|-------|
| ILMN_1750429 | MKNK1        | 6.57E-03 | 0.36  |
| ILMN_2365248 | HVCN1        | 6.57E-03 | -0.33 |
| ILMN_1772369 | PDHA1        | 6.61E-03 | -0.37 |
| ILMN_3205353 | LOC100131294 | 6.65E-03 | 0.30  |
| ILMN_1670672 | TMEM37       | 6.65E-03 | 0.37  |
| ILMN_2122103 | ETS1         | 6.65E-03 | 0.51  |
| ILMN_1711786 | NFE2         | 6.69E-03 | 0.55  |
| ILMN_1811933 | SHMT1        | 6.70E-03 | -0.36 |
| ILMN_2245305 | ABHD12       | 6.71E-03 | -0.37 |
| ILMN_1780582 | CD83         | 6.71E-03 | -0.46 |
| ILMN_2340217 | PTPRC        | 6.74E-03 | 0.46  |
| ILMN_1745242 | PLSCR1       | 6.74E-03 | 0.55  |
| ILMN_1659914 | C9orf98      | 6.75E-03 | -0.31 |
| ILMN_2243308 | ACVR1B       | 6.75E-03 | 0.37  |
| ILMN_2208903 | CD52         | 6.81E-03 | -0.49 |
| ILMN_1652357 | PDHX         | 6.82E-03 | 0.38  |
| ILMN_2378100 | FBXL5        | 6.82E-03 | 0.36  |
| ILMN_1658995 | ACOT9        | 6.85E-03 | -0.39 |
| ILMN_1739751 | SLC26A11     | 6.85E-03 | -0.44 |
| ILMN_3248551 | C2CD4B       | 6.92E-03 | 0.68  |
| ILMN_2072101 | C4orf49      | 6.92E-03 | -0.14 |
| ILMN_2352121 | NT5C3        | 6.98E-03 | -0.65 |
| ILMN_2128293 | APIP         | 7.00E-03 | 0.43  |
| ILMN_2337336 | PVRL2        | 7.00E-03 | 0.43  |
| ILMN_2169439 | ITGAV        | 7.00E-03 | 0.67  |
| ILMN_1769895 | CCR2         | 7.01E-03 | 0.20  |
| ILMN_1675190 | RETN         | 7.09E-03 | 0.13  |
| ILMN_2384241 | TGFBR2       | 7.09E-03 | 0.37  |
| ILMN_1664922 | FLNB         | 7.31E-03 | -0.29 |
| ILMN_1684346 | TNFAIP8L1    | 7.33E-03 | -0.30 |
| ILMN_1751975 | ALOX15B      | 7.33E-03 | -0.25 |
| ILMN_2162972 | LYZ          | 7.34E-03 | -0.48 |
| ILMN_3247261 | RAPGEF2      | 7.34E-03 | 0.32  |
| ILMN_1788017 | HSH2D        | 7.44E-03 | -0.32 |
| ILMN_1815168 | HVCN1        | 7.46E-03 | -0.40 |
| ILMN_1739032 | TMEM70       | 7.50E-03 | 0.26  |
| ILMN_1810560 | P8           | 7.50E-03 | -0.37 |
| ILMN_1755405 | FRAG1        | 7.53E-03 | -0.34 |
| ILMN_1727617 | XRN2         | 7.53E-03 | 0.34  |
| ILMN_2156982 | IMP4         | 7.54E-03 | -0.39 |
| ILMN_1747744 | LHFPL2       | 7.54E-03 | 0.37  |
| ILMN_1665859 | RAB27A       | 7.57E-03 | 0.32  |
| ILMN_1724139 | TMEM123      | 7.57E-03 | -0.34 |
| ILMN_1787529 | C3AR1        | 7.58E-03 | 0.36  |
| ILMN_1717163 | F13A1        | 7.73E-03 | 0.42  |
| ILMN_2367070 | ACOT9        | 7.77E-03 | -0.42 |



|              |           |          |       |
|--------------|-----------|----------|-------|
| ILMN_1742981 | TUBA1A    | 7.77E-03 | 1.08  |
| ILMN_1673892 | GK5       | 7.83E-03 | 0.27  |
| ILMN_1690170 | CRABP2    | 7.85E-03 | -0.33 |
| ILMN_2345142 | SULF2     | 7.95E-03 | -0.23 |
| ILMN_1813685 | RAB7L1    | 7.96E-03 | 0.33  |
| ILMN_1654445 | LOC347292 | 7.96E-03 | -0.30 |
| ILMN_1736729 | OAS2      | 8.02E-03 | -0.35 |
| ILMN_1694177 | PCNA      | 8.04E-03 | -0.40 |
| ILMN_1706502 | EIF2AK2   | 8.07E-03 | -0.44 |
| ILMN_1661717 | TFDP1     | 8.10E-03 | -0.46 |
| ILMN_1654639 | HERC6     | 8.11E-03 | -0.45 |
| ILMN_1738263 | PIGU      | 8.15E-03 | -0.32 |
| ILMN_2246882 | SP140     | 8.16E-03 | -0.26 |
| ILMN_1659984 | MEP1A     | 8.17E-03 | -0.24 |
| ILMN_1793517 | RASAL1    | 8.17E-03 | -0.28 |
| ILMN_1666364 | COQ10A    | 8.17E-03 | -0.29 |
| ILMN_2104141 | FGD5      | 8.22E-03 | 0.36  |
| ILMN_1689652 | RNMTL1    | 8.28E-03 | -0.30 |
| ILMN_2329429 | GIMAP6    | 8.44E-03 | 0.35  |
| ILMN_1736441 | PDXP      | 8.44E-03 | -0.33 |
| ILMN_1790778 | PNMA2     | 8.44E-03 | 0.40  |
| ILMN_3266606 | FABP5L2   | 8.44E-03 | 0.33  |
| ILMN_1727606 | C12orf59  | 8.47E-03 | 0.27  |
| ILMN_1765880 | C16orf57  | 8.47E-03 | 0.43  |
| ILMN_1674046 | C10orf128 | 8.56E-03 | -0.31 |
| ILMN_1765076 | APPL2     | 8.64E-03 | 0.34  |
| ILMN_2392189 | CTDSPL    | 8.66E-03 | -0.40 |
| ILMN_2114568 | GBP5      | 8.66E-03 | -0.45 |
| ILMN_1680579 | ATP2B4    | 8.72E-03 | 0.48  |
| ILMN_1658425 | DAG1      | 8.72E-03 | -0.31 |
| ILMN_1782305 | NR4A2     | 8.75E-03 | -0.38 |
| ILMN_2128428 | DAB2      | 8.78E-03 | 0.42  |
| ILMN_3251145 | LDHA      | 8.78E-03 | 0.17  |
| ILMN_1812489 | CCDC21    | 8.84E-03 | -0.26 |
| ILMN_2257665 | PARL      | 8.96E-03 | 0.44  |
| ILMN_1681252 | C17orf44  | 9.06E-03 | -0.31 |
| ILMN_1750181 | TESC      | 9.09E-03 | 0.25  |
| ILMN_1807277 | IFI30     | 9.24E-03 | -0.31 |
| ILMN_1740875 | FPR2      | 9.28E-03 | 0.50  |
| ILMN_1805228 | LRG1      | 9.34E-03 | 0.26  |
| ILMN_2128750 | PTTG1IP   | 9.40E-03 | 0.35  |
| ILMN_1752755 | VWF       | 9.45E-03 | -0.55 |
| ILMN_1752199 | LHPP      | 9.45E-03 | -0.34 |
| ILMN_1736806 | PAG1      | 9.45E-03 | 0.29  |
| ILMN_1665095 | NELF      | 9.45E-03 | -0.26 |
| ILMN_2187727 | NOC3L     | 9.45E-03 | -0.25 |

|              |          |          |       |
|--------------|----------|----------|-------|
| ILMN_1782788 | CSDA     | 9.45E-03 | 0.46  |
| ILMN_1718972 | MFSD3    | 9.45E-03 | -0.30 |
| ILMN_1677603 | C1S      | 9.45E-03 | 0.18  |
| ILMN_1694539 | MAP3K6   | 9.45E-03 | 0.31  |
| ILMN_1781795 | ERH      | 9.49E-03 | -0.35 |
| ILMN_1781812 | NR4A3    | 9.50E-03 | -0.15 |
| ILMN_1782938 | SLC16A10 | 9.52E-03 | 0.39  |
| ILMN_1750409 | RAB9A    | 9.56E-03 | -0.33 |
| ILMN_1906423 |          | 9.56E-03 | 0.44  |
| ILMN_1756501 | ST6GAL1  | 9.61E-03 | 0.28  |
| ILMN_1787718 | SLC27A1  | 9.62E-03 | -0.31 |
| ILMN_1681016 | SPNS1    | 9.67E-03 | -0.32 |
| ILMN_1781536 | FAH      | 9.72E-03 | -0.36 |
| ILMN_1792885 | CTSC     | 9.76E-03 | 0.43  |
| ILMN_1681591 | PTPN1    | 9.76E-03 | 0.42  |
| ILMN_1797531 | PRKAG2   | 9.78E-03 | -0.32 |
| ILMN_1659553 | ANAPC1   | 9.78E-03 | -0.23 |
| ILMN_1776602 | RNASE4   | 9.85E-03 | -0.44 |
| ILMN_2375418 | DPH2     | 9.87E-03 | -0.26 |
| ILMN_1702637 | BEX1     | 9.95E-03 | -0.22 |

#### IL4

| ProbeID      | Gene Symbol | FDR      | Log <sub>2</sub> [IL4/NoTx] |
|--------------|-------------|----------|-----------------------------|
| ILMN_2136446 | CTNNAL1     | 9.45E-11 | 2.52                        |
| ILMN_1721901 | CTNNAL1     | 3.57E-10 | 2.84                        |
| ILMN_1756701 | DHRS11      | 3.95E-10 | 2.27                        |
| ILMN_1764030 | CCL23       | 9.81E-10 | 2.24                        |
| ILMN_1671486 | HOMER2      | 9.81E-10 | 2.19                        |
| ILMN_1761968 | PPP1R14A    | 1.27E-09 | 2.15                        |
| ILMN_1686109 | CCL23       | 1.57E-09 | 2.09                        |
| ILMN_1705750 | TGM2        | 2.53E-09 | 2.81                        |
| ILMN_1747355 | CCL3L1      | 5.83E-09 | 1.89                        |
| ILMN_1792885 | CTSC        | 5.90E-09 | 2.62                        |
| ILMN_1676372 | CD209       | 8.04E-09 | 2.80                        |
| ILMN_1671509 | CCL3        | 8.04E-09 | 1.89                        |
| ILMN_1679267 | TGM2        | 8.91E-09 | 1.42                        |
| ILMN_3245659 | ERI1        | 8.91E-09 | 1.81                        |
| ILMN_1779558 | GAS6        | 9.49E-09 | 1.44                        |
| ILMN_2105573 | CCL3L3      | 9.49E-09 | 1.86                        |
| ILMN_1682312 | CYBB        | 9.79E-09 | -1.77                       |
| ILMN_1800739 | SPINT2      | 1.55E-08 | 2.37                        |
| ILMN_1729801 | S100A8      | 1.74E-08 | -1.85                       |
| ILMN_1797236 | TGM2        | 1.93E-08 | 1.21                        |
| ILMN_2218856 | CCL3L1      | 2.28E-08 | 1.53                        |

|              |           |          |       |
|--------------|-----------|----------|-------|
| ILMN_1693009 | FGL2      | 2.65E-08 | 1.69  |
| ILMN_1710186 | CCL17     | 3.56E-08 | 4.11  |
| ILMN_1738207 | CISH      | 3.56E-08 | 1.27  |
| ILMN_1784749 | GAS6      | 3.56E-08 | 1.31  |
| ILMN_1724708 | RAB33A    | 4.14E-08 | 2.02  |
| ILMN_2373791 | ENPP2     | 4.28E-08 | 1.18  |
| ILMN_2415303 | CLEC10A   | 5.20E-08 | 2.46  |
| ILMN_1671969 | UGP2      | 5.40E-08 | 1.30  |
| ILMN_1784756 | ACOT7     | 5.41E-08 | 1.78  |
| ILMN_1750974 | S100A9    | 5.41E-08 | -1.24 |
| ILMN_2332250 | ACOT7     | 5.41E-08 | 1.81  |
| ILMN_3247139 | C17orf96  | 6.50E-08 | 1.60  |
| ILMN_2092118 | FPR1      | 7.13E-08 | -1.41 |
| ILMN_2403237 | CHN2      | 8.92E-08 | 1.18  |
| ILMN_3201937 | LOC645381 | 1.13E-07 | 1.32  |
| ILMN_2184373 | IL8       | 1.25E-07 | -1.45 |
| ILMN_1676563 | HTRA1     | 1.33E-07 | -1.45 |
| ILMN_2160476 | CCL22     | 1.42E-07 | 1.77  |
| ILMN_1709348 | ALDH1A1   | 1.47E-07 | -1.32 |
| ILMN_1780799 | ENPP2     | 1.48E-07 | 1.16  |
| ILMN_1654411 | CCL18     | 1.48E-07 | 1.72  |
| ILMN_1678939 | VNN2      | 1.48E-07 | -2.09 |
| ILMN_3247023 | FLJ22536  | 1.48E-07 | -1.30 |
| ILMN_2101278 | RGS18     | 1.49E-07 | -0.92 |
| ILMN_1783593 | CCL13     | 1.57E-07 | 4.48  |
| ILMN_1774733 | SOCS1     | 1.93E-07 | 1.87  |
| ILMN_2399363 | CLEC4A    | 2.29E-07 | 1.52  |
| ILMN_1704985 | CYP27A1   | 2.42E-07 | -1.21 |
| ILMN_1759818 | SORL1     | 2.58E-07 | -0.65 |
| ILMN_1696347 | CTSC      | 2.74E-07 | 1.81  |
| ILMN_1694075 | GADD45A   | 3.01E-07 | 0.95  |
| ILMN_1683658 | FKBP1A    | 3.47E-07 | 1.18  |
| ILMN_1712532 | CARD9     | 3.51E-07 | 1.09  |
| ILMN_1809639 | TMEM26    | 3.51E-07 | 1.20  |
| ILMN_1704369 | LIMA1     | 3.51E-07 | 1.11  |
| ILMN_1763207 | BATF3     | 3.59E-07 | 1.66  |
| ILMN_1702447 | IGF2BP2   | 3.59E-07 | 0.91  |
| ILMN_1663640 | MAOA      | 3.66E-07 | 2.28  |
| ILMN_1746673 | 42250     | 3.66E-07 | 0.84  |
| ILMN_1681601 | SUCNR1    | 3.86E-07 | 1.45  |
| ILMN_2242463 | CTSC      | 4.27E-07 | 1.75  |
| ILMN_1747197 | SLC41A2   | 4.35E-07 | 0.79  |
| ILMN_1682636 | CXCL2     | 4.43E-07 | -0.81 |
| ILMN_1911721 |           | 4.43E-07 | 1.40  |
| ILMN_1701173 | KCNK6     | 4.43E-07 | 1.09  |
| ILMN_3244114 | DHRS11    | 4.48E-07 | 1.75  |

|              |           |          |       |
|--------------|-----------|----------|-------|
| ILMN_1680132 | CADM1     | 4.48E-07 | -1.64 |
| ILMN_1807719 | CTNS      | 4.81E-07 | 1.11  |
| ILMN_1666049 | NUP214    | 4.81E-07 | -1.06 |
| ILMN_1740265 | ACOT7     | 4.83E-07 | 1.80  |
| ILMN_2335754 | CD1E      | 5.22E-07 | 0.96  |
| ILMN_1677396 | NDFIP2    | 5.49E-07 | 0.91  |
| ILMN_1696974 | ANG       | 5.55E-07 | -0.98 |
| ILMN_2162972 | LYZ       | 5.55E-07 | -1.28 |
| ILMN_1733535 | ZNF366    | 6.15E-07 | 0.99  |
| ILMN_1810560 | P8        | 6.91E-07 | -1.41 |
| ILMN_1751789 | HNMT      | 6.91E-07 | -0.98 |
| ILMN_1764754 | RAMP1     | 6.91E-07 | 1.56  |
| ILMN_1670490 | PDPN      | 6.91E-07 | -1.03 |
| ILMN_1671116 | C3orf21   | 6.93E-07 | 1.17  |
| ILMN_1760727 | ANG       | 6.93E-07 | -1.09 |
| ILMN_1677038 | FLJ21986  | 6.93E-07 | -0.77 |
| ILMN_2346479 | HOMER2    | 7.09E-07 | 1.36  |
| ILMN_1797875 | ALOX5AP   | 7.09E-07 | -1.64 |
| ILMN_1776602 | RNASE4    | 7.30E-07 | -0.89 |
| ILMN_1691376 | JAG1      | 7.30E-07 | 0.63  |
| ILMN_1699071 | C21orf7   | 7.30E-07 | -1.08 |
| ILMN_1758864 | VNN2      | 7.67E-07 | -1.96 |
| ILMN_1665455 | DCUN1D3   | 7.67E-07 | 1.76  |
| ILMN_2202915 | FAR2      | 7.72E-07 | 1.55  |
| ILMN_1731745 | NINJ2     | 8.12E-07 | -0.90 |
| ILMN_2371280 | CSF3R     | 8.62E-07 | -1.06 |
| ILMN_2348487 | EMR3      | 9.28E-07 | -1.11 |
| ILMN_3306997 | METTL1    | 9.59E-07 | 0.97  |
| ILMN_1702237 | FKBP1A    | 1.00E-06 | 0.71  |
| ILMN_1790689 | CRISPLD2  | 1.00E-06 | -1.07 |
| ILMN_2294978 | RNASE4    | 1.00E-06 | -0.86 |
| ILMN_1694780 | GCHFR     | 1.01E-06 | -1.05 |
| ILMN_2060115 | SORL1     | 1.07E-06 | -0.66 |
| ILMN_1757072 | LOC642489 | 1.07E-06 | 1.10  |
| ILMN_1775501 | IL1B      | 1.07E-06 | -1.15 |
| ILMN_2052208 | GADD45A   | 1.09E-06 | 0.97  |
| ILMN_2129505 | CYBASC3   | 1.09E-06 | -0.93 |
| ILMN_2404688 | NUPR1     | 1.10E-06 | -1.38 |
| ILMN_2294976 | RNASE4    | 1.10E-06 | -0.88 |
| ILMN_2205963 | C10orf54  | 1.13E-06 | -1.06 |
| ILMN_1774110 | CHN2      | 1.14E-06 | 0.92  |
| ILMN_1731292 | CA5A      | 1.14E-06 | 0.69  |
| ILMN_1747305 | GIMAP8    | 1.14E-06 | -1.03 |
| ILMN_1713679 | MREG      | 1.14E-06 | 0.78  |
| ILMN_1856480 |           | 1.18E-06 | 1.01  |
| ILMN_1793859 | ALDH2     | 1.18E-06 | -0.90 |

|              |          |          |       |
|--------------|----------|----------|-------|
| ILMN_1740015 | CD14     | 1.23E-06 | -1.43 |
| ILMN_3240222 | PRAGMIN  | 1.32E-06 | 1.13  |
| ILMN_1751572 | TLE1     | 1.32E-06 | 1.09  |
| ILMN_1673773 | GALNTL4  | 1.32E-06 | 0.61  |
| ILMN_1785071 | SEPP1    | 1.36E-06 | -0.93 |
| ILMN_1707312 | NFIL3    | 1.36E-06 | 1.22  |
| ILMN_1749244 | LYRM1    | 1.46E-06 | 1.07  |
| ILMN_1780465 | CLEC5A   | 1.55E-06 | -0.88 |
| ILMN_1811114 | SDS      | 1.55E-06 | -1.19 |
| ILMN_1654210 | CD1C     | 1.64E-06 | 0.76  |
| ILMN_3242586 | RHOU     | 1.64E-06 | -1.10 |
| ILMN_1779706 | TP53BP2  | 1.72E-06 | 0.80  |
| ILMN_1738116 | TMEM119  | 1.80E-06 | -1.21 |
| ILMN_1713124 | AKR1C3   | 1.86E-06 | -1.16 |
| ILMN_1760180 | MID2     | 1.86E-06 | 0.79  |
| ILMN_1770768 | SLAMF1   | 1.89E-06 | 0.92  |
| ILMN_1744138 | CHCHD7   | 1.96E-06 | 0.85  |
| ILMN_2408572 | RNASE4   | 1.96E-06 | -0.69 |
| ILMN_1735930 | KLF2     | 1.99E-06 | 1.71  |
| ILMN_2147435 | MAN2A1   | 2.06E-06 | 0.76  |
| ILMN_1709204 | CLEC4A   | 2.09E-06 | 1.45  |
| ILMN_2143795 | MGC4677  | 2.12E-06 | 1.10  |
| ILMN_2261600 | FCGR1B   | 2.12E-06 | -1.12 |
| ILMN_1670325 | SLC47A1  | 2.21E-06 | 0.83  |
| ILMN_2391051 | FCGR1B   | 2.21E-06 | -0.80 |
| ILMN_1673960 | MAT2B    | 2.32E-06 | 0.90  |
| ILMN_1761961 | CCDC90A  | 2.39E-06 | 0.85  |
| ILMN_1757186 | GIMAP1   | 2.44E-06 | -1.12 |
| ILMN_2359945 | CES1     | 2.47E-06 | -0.93 |
| ILMN_2382648 | MID2     | 2.50E-06 | 0.72  |
| ILMN_2402798 | AP2M1    | 2.67E-06 | 0.83  |
| ILMN_2401878 | DUSP10   | 2.68E-06 | -0.90 |
| ILMN_1705047 | TLR8     | 2.69E-06 | -0.87 |
| ILMN_1666733 | IL8      | 2.71E-06 | -1.75 |
| ILMN_2096372 | ALDH1A1  | 2.71E-06 | -0.94 |
| ILMN_2176063 | FCGR1A   | 2.71E-06 | -0.94 |
| ILMN_1728435 | C12orf45 | 2.72E-06 | 0.92  |
| ILMN_1804277 | SPRED1   | 2.74E-06 | 1.01  |
| ILMN_1682081 | RNF19B   | 2.74E-06 | 1.32  |
| ILMN_1733666 | PLDN     | 2.78E-06 | 0.77  |
| ILMN_1913678 |          | 2.86E-06 | -0.89 |
| ILMN_1657892 | TLR8     | 2.99E-06 | -1.05 |
| ILMN_2136089 | MTE      | 3.05E-06 | -0.92 |
| ILMN_1791147 | YPEL3    | 3.08E-06 | -0.75 |
| ILMN_2401873 | DUSP10   | 3.29E-06 | -0.60 |
| ILMN_2216918 | SHPK     | 3.29E-06 | 0.84  |

|              |              |          |       |
|--------------|--------------|----------|-------|
| ILMN_1805737 | PFKP         | 3.40E-06 | 1.08  |
| ILMN_1763638 | BCAR3        | 3.40E-06 | 0.70  |
| ILMN_1780582 | CD83         | 3.48E-06 | 0.96  |
| ILMN_1667050 | PRPS1        | 3.50E-06 | 0.94  |
| ILMN_1699489 | TUBB6        | 3.69E-06 | 0.80  |
| ILMN_1661755 | FAM129B      | 3.76E-06 | 0.71  |
| ILMN_1857017 |              | 3.94E-06 | 0.96  |
| ILMN_1666845 | KRT17        | 3.96E-06 | 0.50  |
| ILMN_2374633 | ZWILCH       | 3.96E-06 | 0.69  |
| ILMN_3207060 | LOC647276    | 3.96E-06 | 0.75  |
| ILMN_3236428 | TMEM170B     | 3.96E-06 | -0.78 |
| ILMN_1805175 | TGFA         | 3.96E-06 | 0.81  |
| ILMN_1712475 | HS3ST2       | 3.96E-06 | 0.61  |
| ILMN_1761281 | LOC441019    | 4.03E-06 | -0.89 |
| ILMN_1780671 | PLEKHG3      | 4.09E-06 | -0.50 |
| ILMN_1776181 | BIRC3        | 4.23E-06 | 1.15  |
| ILMN_1751561 | CAMK1D       | 4.24E-06 | 0.70  |
| ILMN_1795930 | PTGER4       | 4.24E-06 | -0.80 |
| ILMN_1796336 | MAP1S        | 4.27E-06 | 1.17  |
| ILMN_1688775 | METRNL       | 4.33E-06 | 1.16  |
| ILMN_1804051 | SNX8         | 4.39E-06 | 1.17  |
| ILMN_1785345 | GPR84        | 4.39E-06 | -0.99 |
| ILMN_1664631 | ADAM28       | 4.52E-06 | -0.48 |
| ILMN_1701914 | CD274        | 4.69E-06 | 0.65  |
| ILMN_1689004 | TNFRSF12A    | 4.69E-06 | 0.64  |
| ILMN_1655990 | CDK5RAP2     | 4.95E-06 | -0.90 |
| ILMN_1690342 | LTA4H        | 5.12E-06 | -1.18 |
| ILMN_1689734 | IL1RN        | 5.21E-06 | 1.46  |
| ILMN_1735764 | HTR2B        | 5.21E-06 | -1.20 |
| ILMN_1906187 |              | 5.21E-06 | 0.66  |
| ILMN_1796349 | SMPDL3A      | 5.21E-06 | -0.90 |
| ILMN_2401258 | FAM13A       | 5.37E-06 | -0.65 |
| ILMN_1658071 | ATP1B1       | 5.37E-06 | 0.75  |
| ILMN_1676159 | MST4         | 5.97E-06 | 1.00  |
| ILMN_1669831 | C6orf192     | 6.03E-06 | -0.94 |
| ILMN_1719543 | MAF          | 6.08E-06 | 0.85  |
| ILMN_1653166 | CLEC10A      | 6.13E-06 | 1.52  |
| ILMN_1726230 | CD1B         | 6.14E-06 | 0.68  |
| ILMN_1669409 | VSIG4        | 6.23E-06 | -1.06 |
| ILMN_1710221 | GPR35        | 6.26E-06 | 0.72  |
| ILMN_1758229 | QSOX1        | 6.40E-06 | 0.74  |
| ILMN_1676548 | BZW2         | 6.40E-06 | 0.68  |
| ILMN_1661695 | IRAK3        | 6.52E-06 | -0.68 |
| ILMN_3283573 | LOC647276    | 6.52E-06 | 0.77  |
| ILMN_1730816 | GPR162       | 6.59E-06 | -0.72 |
| ILMN_3280402 | LOC100132510 | 6.84E-06 | -0.56 |

|              |              |          |       |
|--------------|--------------|----------|-------|
| ILMN_1657435 | MT1M         | 7.12E-06 | -0.86 |
| ILMN_1680996 | ALOX5        | 7.14E-06 | -1.45 |
| ILMN_1700268 | QPRT         | 7.17E-06 | 1.26  |
| ILMN_2339835 | PTGS1        | 7.33E-06 | 0.91  |
| ILMN_1682761 | C17orf87     | 7.44E-06 | 1.74  |
| ILMN_1652237 | CBR3         | 7.44E-06 | 0.60  |
| ILMN_1695246 | KLHDC8B      | 7.46E-06 | -0.99 |
| ILMN_1704797 | CLEC10A      | 7.57E-06 | 1.03  |
| ILMN_1756862 | APOL3        | 7.60E-06 | -0.74 |
| ILMN_2328666 | CD83         | 8.03E-06 | 0.87  |
| ILMN_2197365 | RGS2         | 8.05E-06 | -1.08 |
| ILMN_1800225 | PPARG        | 8.20E-06 | 0.87  |
| ILMN_3307757 | C17orf87     | 8.35E-06 | 1.51  |
| ILMN_1752285 | RPL4         | 8.35E-06 | 0.84  |
| ILMN_2193817 | CLEC4G       | 8.39E-06 | 0.77  |
| ILMN_1751034 | ITPRIPL2     | 8.49E-06 | 0.90  |
| ILMN_1656501 | DUSP5        | 8.49E-06 | 0.74  |
| ILMN_1758672 | FAM107B      | 8.49E-06 | -0.79 |
| ILMN_1741957 | RABEPK       | 8.49E-06 | 0.76  |
| ILMN_1679725 | PCYOX1       | 8.55E-06 | -0.57 |
| ILMN_1656913 | MDH1         | 8.85E-06 | 0.74  |
| ILMN_1769299 | MTMR11       | 8.97E-06 | -0.46 |
| ILMN_1694596 | FAR2         | 9.15E-06 | 0.84  |
| ILMN_2333367 | FKBP1A       | 9.22E-06 | 1.15  |
| ILMN_2171384 | CXCL5        | 9.39E-06 | -1.94 |
| ILMN_1705297 | MYBPH        | 9.54E-06 | -0.51 |
| ILMN_1670542 | AK2          | 9.65E-06 | 0.78  |
| ILMN_1772821 | KIAA1671     | 9.81E-06 | 1.08  |
| ILMN_1912287 |              | 9.81E-06 | 1.40  |
| ILMN_2367239 | RCAN1        | 9.81E-06 | 1.13  |
| ILMN_1782015 | FCRLB        | 9.81E-06 | 0.82  |
| ILMN_1663142 | CLEC12A      | 9.81E-06 | -0.81 |
| ILMN_1778599 | SP140        | 9.81E-06 | -0.47 |
| ILMN_1806023 | JUN          | 9.81E-06 | 0.81  |
| ILMN_1666444 | RBMS1        | 9.95E-06 | 0.78  |
| ILMN_2186061 | PFKFB3       | 1.01E-05 | -1.00 |
| ILMN_1679826 | CST7         | 1.01E-05 | 0.74  |
| ILMN_3214389 | LOC100133583 | 1.02E-05 | 0.96  |
| ILMN_2095653 | AFMID        | 1.02E-05 | -0.97 |
| ILMN_1701933 | SNCA         | 1.02E-05 | -0.75 |
| ILMN_3307752 | DLEU7        | 1.04E-05 | -0.51 |
| ILMN_2291954 | SLA          | 1.05E-05 | 0.84  |
| ILMN_1791728 | SLC25A25     | 1.05E-05 | 0.90  |
| ILMN_2364384 | PPARG        | 1.08E-05 | 0.91  |
| ILMN_1810628 | KIAA0367     | 1.10E-05 | -0.87 |
| ILMN_1680618 | MYC          | 1.10E-05 | 0.74  |

|              |               |          |       |
|--------------|---------------|----------|-------|
| ILMN_1800317 | WNT5A         | 1.10E-05 | 0.59  |
| ILMN_1700515 | C17orf58      | 1.11E-05 | 2.44  |
| ILMN_1728742 | C5orf4        | 1.13E-05 | -0.52 |
| ILMN_1721035 | MS4A6A        | 1.13E-05 | 0.84  |
| ILMN_1757872 | DKFZp761P0423 | 1.14E-05 | 0.98  |
| ILMN_1781386 | WIPI1         | 1.16E-05 | -0.80 |
| ILMN_1778709 | PICALM        | 1.16E-05 | 0.49  |
| ILMN_1679460 | PPFIBP1       | 1.18E-05 | 0.54  |
| ILMN_1742332 | KCTD12        | 1.18E-05 | -0.93 |
| ILMN_1698732 | PALLD         | 1.20E-05 | 2.03  |
| ILMN_1775822 | PDGFB         | 1.20E-05 | 0.61  |
| ILMN_1785252 | SLC26A6       | 1.21E-05 | 0.96  |
| ILMN_1815190 | METTL1        | 1.26E-05 | 0.69  |
| ILMN_1759023 | WFS1          | 1.30E-05 | 1.33  |
| ILMN_2365307 | CD276         | 1.31E-05 | 0.89  |
| ILMN_1736112 | ARHGAP10      | 1.33E-05 | 0.57  |
| ILMN_2347949 | G6PD          | 1.35E-05 | 0.74  |
| ILMN_2389151 | UGP2          | 1.37E-05 | 0.77  |
| ILMN_1720270 | CDR2          | 1.37E-05 | 1.01  |
| ILMN_1702636 | TUBB6         | 1.38E-05 | 0.65  |
| ILMN_2096083 | PLEKHA5       | 1.43E-05 | 0.49  |
| ILMN_1680501 | GTF2IRD2B     | 1.43E-05 | -0.50 |
| ILMN_1719986 | PIK3IP1       | 1.47E-05 | -0.63 |
| ILMN_1685009 | ITGAM         | 1.53E-05 | 0.74  |
| ILMN_1732885 | BTBD12        | 1.53E-05 | 1.00  |
| ILMN_1706598 | ACPL2         | 1.53E-05 | 0.45  |
| ILMN_2306955 | ACPL2         | 1.55E-05 | 0.47  |
| ILMN_1709634 | CMBL          | 1.55E-05 | -0.71 |
| ILMN_1679217 | FAM110B       | 1.57E-05 | 0.62  |
| ILMN_2083946 | TGFA          | 1.57E-05 | 0.87  |
| ILMN_1765701 | LOC399942     | 1.57E-05 | 0.74  |
| ILMN_1730201 | DTNA          | 1.57E-05 | 0.68  |
| ILMN_2112988 | NCF1C         | 1.58E-05 | -0.81 |
| ILMN_1800261 | TUBA1B        | 1.61E-05 | 0.62  |
| ILMN_2215119 | SYNJ2         | 1.68E-05 | 0.32  |
| ILMN_1782050 | CEBPD         | 1.68E-05 | -1.02 |
| ILMN_1746888 | PCOLCE2       | 1.68E-05 | -0.76 |
| ILMN_1794803 | NDP           | 1.68E-05 | 0.74  |
| ILMN_1749070 | HLA-DPB1      | 1.68E-05 | 0.53  |
| ILMN_2046470 | DAAM1         | 1.69E-05 | 0.58  |
| ILMN_1664761 | TMEM138       | 1.69E-05 | -0.70 |
| ILMN_1776678 | GIMAP7        | 1.78E-05 | -0.64 |
| ILMN_1721842 | RYBP          | 1.80E-05 | 0.68  |
| ILMN_1669888 | CSTA          | 1.80E-05 | -0.52 |
| ILMN_1716563 | PRKCB1        | 1.83E-05 | -0.34 |
| ILMN_1688152 | IL27RA        | 1.92E-05 | 0.81  |



|              |           |          |       |
|--------------|-----------|----------|-------|
| ILMN_3247506 | FCGR1C    | 1.92E-05 | -0.77 |
| ILMN_1737514 | KYNU      | 1.98E-05 | -0.80 |
| ILMN_2114568 | GBP5      | 2.04E-05 | -0.85 |
| ILMN_1688580 | CAMP      | 2.08E-05 | -0.84 |
| ILMN_1727315 | DENND1A   | 2.11E-05 | 0.48  |
| ILMN_1723486 | HK2       | 2.11E-05 | -0.77 |
| ILMN_2135272 | GIMAP2    | 2.17E-05 | -0.56 |
| ILMN_1842850 |           | 2.17E-05 | 0.49  |
| ILMN_1773006 | FABP4     | 2.35E-05 | 1.95  |
| ILMN_1687978 | PHLDA1    | 2.36E-05 | 0.72  |
| ILMN_2159272 | PDCD1LG2  | 2.36E-05 | 0.95  |
| ILMN_1683969 | FKBP1A    | 2.38E-05 | 0.93  |
| ILMN_1767320 | MAPK1     | 2.43E-05 | 0.57  |
| ILMN_1668063 | FCN1      | 2.50E-05 | -1.01 |
| ILMN_1656057 | PLAU      | 2.53E-05 | 0.82  |
| ILMN_1667825 | MLKL      | 2.53E-05 | -0.68 |
| ILMN_1712888 | HSPH1     | 2.56E-05 | 0.89  |
| ILMN_1806908 | PRKCB1    | 2.58E-05 | -0.60 |
| ILMN_1700143 | FRMD4B    | 2.66E-05 | -0.50 |
| ILMN_1714592 | CDA       | 2.71E-05 | -0.55 |
| ILMN_1656378 | NMT2      | 2.72E-05 | -0.59 |
| ILMN_1712985 | C17orf58  | 2.72E-05 | 2.46  |
| ILMN_1814789 | UBAP2L    | 2.72E-05 | 0.63  |
| ILMN_1695590 | ADRB2     | 2.72E-05 | -0.52 |
| ILMN_2235283 | MAPK1     | 2.72E-05 | 0.66  |
| ILMN_1652198 | CCM2      | 2.72E-05 | -0.47 |
| ILMN_1663080 | LFNG      | 2.78E-05 | -0.64 |
| ILMN_2284181 | UGP2      | 2.84E-05 | 0.41  |
| ILMN_2290118 | MEGF9     | 2.85E-05 | -0.85 |
| ILMN_1787815 | TRIB3     | 2.85E-05 | 1.12  |
| ILMN_2229261 | SIGLEC16  | 2.95E-05 | -0.58 |
| ILMN_1718766 | MT1F      | 2.97E-05 | -0.61 |
| ILMN_1713505 | NPC1      | 2.98E-05 | 0.83  |
| ILMN_1669376 | DRAM1     | 3.06E-05 | -0.64 |
| ILMN_1746517 | KYNU      | 3.06E-05 | -0.74 |
| ILMN_1743373 | DLL1      | 3.07E-05 | -0.39 |
| ILMN_2283325 | GPR177    | 3.12E-05 | -1.00 |
| ILMN_1689086 | CTSC      | 3.12E-05 | 0.55  |
| ILMN_1689655 | HLA-DRA   | 3.13E-05 | 0.67  |
| ILMN_1715864 | NHS       | 3.17E-05 | -0.39 |
| ILMN_1685170 | ANXA11    | 3.18E-05 | 0.65  |
| ILMN_1758623 | HIST1H2BD | 3.23E-05 | -0.72 |
| ILMN_1676042 | ALOX15    | 3.31E-05 | 1.10  |
| ILMN_1764964 | IFNGR2    | 3.31E-05 | 0.70  |
| ILMN_1730032 | BOK       | 3.32E-05 | -0.61 |
| ILMN_1808333 | PPP1R7    | 3.32E-05 | 0.66  |

|              |           |          |       |
|--------------|-----------|----------|-------|
| ILMN_1773363 | CIITA     | 3.35E-05 | 0.69  |
| ILMN_1815168 | HVCN1     | 3.36E-05 | -0.77 |
| ILMN_1780861 | LOC653506 | 3.44E-05 | 0.95  |
| ILMN_1698313 | CPM       | 3.53E-05 | -0.42 |
| ILMN_1717934 | SYT11     | 3.58E-05 | -0.75 |
| ILMN_2403228 | CLEC12A   | 3.58E-05 | -0.57 |
| ILMN_2406501 | SOD2      | 3.59E-05 | -0.91 |
| ILMN_1716736 | CD80      | 3.59E-05 | 0.63  |
| ILMN_2410038 | FAM111A   | 3.59E-05 | -0.62 |
| ILMN_1758315 | SLC9A9    | 3.66E-05 | -0.58 |
| ILMN_2389155 | UGP2      | 3.66E-05 | 0.62  |
| ILMN_1757867 | MTM       | 3.66E-05 | -0.31 |
| ILMN_2328776 | MST4      | 3.66E-05 | 0.81  |
| ILMN_1699598 | AP2M1     | 3.66E-05 | 0.76  |
| ILMN_2358540 | RBMS1     | 3.72E-05 | 0.77  |
| ILMN_1808566 | TMEM180   | 3.82E-05 | -0.52 |
| ILMN_1703074 | CPD       | 3.83E-05 | -0.66 |
| ILMN_1657451 | SRPK2     | 3.83E-05 | 0.70  |
| ILMN_2115490 | NBPF20    | 3.87E-05 | -0.96 |
| ILMN_1784602 | CDKN1A    | 3.96E-05 | 0.93  |
| ILMN_1712112 | RCAN1     | 3.98E-05 | 1.19  |
| ILMN_1760303 | PIK3R1    | 4.07E-05 | 0.60  |
| ILMN_2307656 | AGTRAP    | 4.16E-05 | -0.57 |
| ILMN_1758939 | RIPK2     | 4.16E-05 | 0.80  |
| ILMN_1730734 | TMEM205   | 4.21E-05 | -0.68 |
| ILMN_1774874 | IL1RN     | 4.23E-05 | 1.35  |
| ILMN_1713846 | PPM1H     | 4.23E-05 | -0.58 |
| ILMN_1778240 | GFOD1     | 4.27E-05 | 0.66  |
| ILMN_2345898 | SLA       | 4.38E-05 | 0.81  |
| ILMN_1796245 | DNASE2    | 4.39E-05 | -0.80 |
| ILMN_1781983 | AP1B1     | 4.39E-05 | 0.84  |
| ILMN_1757552 | PTRF      | 4.42E-05 | 0.87  |
| ILMN_1737308 | GLRX      | 4.46E-05 | -0.64 |
| ILMN_1755974 | ALDOC     | 4.46E-05 | -0.48 |
| ILMN_3205162 | LOC646688 | 4.47E-05 | 0.83  |
| ILMN_2148668 | RCBTB2    | 4.47E-05 | -0.62 |
| ILMN_1674574 | VNN1      | 4.49E-05 | -0.51 |
| ILMN_2342066 | METRNL    | 4.49E-05 | 0.84  |
| ILMN_2042595 | PCM1      | 4.51E-05 | 0.62  |
| ILMN_3257030 | FTHL16    | 4.54E-05 | -0.63 |
| ILMN_3282174 | LOC646688 | 4.62E-05 | 0.73  |
| ILMN_1657361 | CBX7      | 4.73E-05 | -0.46 |
| ILMN_1726913 | RBPJ      | 4.73E-05 | 0.32  |
| ILMN_1721316 | TNFRSF10A | 4.74E-05 | 0.47  |
| ILMN_1685538 | LOC158345 | 4.76E-05 | 0.77  |
| ILMN_1804935 | VNN3      | 4.77E-05 | -0.53 |

|              |           |          |       |
|--------------|-----------|----------|-------|
| ILMN_1651496 | HIST1H2BD | 4.79E-05 | -0.64 |
| ILMN_1801303 | AMY2A     | 4.79E-05 | -0.43 |
| ILMN_2365465 | XBP1      | 4.82E-05 | 0.84  |
| ILMN_1768284 | P2RY8     | 4.90E-05 | -0.61 |
| ILMN_1763837 | ANPEP     | 4.93E-05 | 1.10  |
| ILMN_1782389 | LAD1      | 4.97E-05 | 0.75  |
| ILMN_1662451 | FCER2     | 4.99E-05 | 1.39  |
| ILMN_1668039 | GYPC      | 4.99E-05 | -0.66 |
| ILMN_2341254 | STARD13   | 5.03E-05 | -0.51 |
| ILMN_2106725 | NCF1B     | 5.05E-05 | -0.41 |
| ILMN_2168217 | EBI2      | 5.14E-05 | 0.80  |
| ILMN_2292178 | CLEC12A   | 5.21E-05 | -0.66 |
| ILMN_1745994 | GAS7      | 5.21E-05 | -0.53 |
| ILMN_1690487 | PCM1      | 5.36E-05 | 0.78  |
| ILMN_1795839 | SCCPDH    | 5.40E-05 | -0.67 |
| ILMN_2339202 | KTN1      | 5.53E-05 | 0.62  |
| ILMN_1747451 | PLCXD1    | 5.53E-05 | -0.60 |
| ILMN_1660544 | ARRDC4    | 5.53E-05 | 0.51  |
| ILMN_2336781 | SOD2      | 5.63E-05 | -0.68 |
| ILMN_1723004 | CD72      | 5.69E-05 | -0.58 |
| ILMN_1787212 | CDKN1A    | 5.73E-05 | 0.56  |
| ILMN_2195914 | GGH       | 5.73E-05 | -0.48 |
| ILMN_1801610 | METRNL    | 5.76E-05 | 0.85  |
| ILMN_1665859 | RAB27A    | 5.76E-05 | -0.47 |
| ILMN_2183389 | TTC9C     | 5.76E-05 | 0.61  |
| ILMN_2085441 | FOXD4L1   | 5.80E-05 | 1.20  |
| ILMN_2319952 | VDR       | 5.80E-05 | 0.60  |
| ILMN_1716053 | AK2       | 5.83E-05 | 0.77  |
| ILMN_1811616 | EEPD1     | 5.83E-05 | 0.50  |
| ILMN_1702787 | SEMA4A    | 5.84E-05 | 0.94  |
| ILMN_1790881 | HNMT      | 5.88E-05 | -0.69 |
| ILMN_1716909 | ADAMDEC1  | 5.89E-05 | -0.65 |
| ILMN_1659601 | CCL26     | 5.89E-05 | 3.02  |
| ILMN_1782938 | SLC16A10  | 5.89E-05 | -0.73 |
| ILMN_1742250 | CCNH      | 5.89E-05 | 0.59  |
| ILMN_1670353 | RAD51AP1  | 5.91E-05 | -0.60 |
| ILMN_2398926 | C17orf58  | 6.01E-05 | 2.37  |
| ILMN_2173524 | FOXD4     | 6.03E-05 | 0.96  |
| ILMN_1692466 | LOC728637 | 6.05E-05 | -0.40 |
| ILMN_1715273 | PICALM    | 6.15E-05 | 0.71  |
| ILMN_1755364 | RALA      | 6.30E-05 | -0.62 |
| ILMN_1795561 | CAMK1D    | 6.30E-05 | 0.45  |
| ILMN_1729749 | HERC5     | 6.31E-05 | -0.74 |
| ILMN_2367753 | ATP2B4    | 6.34E-05 | -0.47 |
| ILMN_1683023 | PDGFC     | 6.51E-05 | 0.55  |
| ILMN_1683313 | ST3GAL1   | 6.51E-05 | -0.59 |

|              |              |          |       |
|--------------|--------------|----------|-------|
| ILMN_1683923 | MT1H         | 6.52E-05 | -0.79 |
| ILMN_1781560 | ST3GAL6      | 6.55E-05 | -0.53 |
| ILMN_1805902 | ELA1         | 6.59E-05 | -0.39 |
| ILMN_1665100 | PTGS1        | 6.59E-05 | 0.49  |
| ILMN_1698952 | TNFRSF11A    | 6.64E-05 | 0.44  |
| ILMN_1772667 | P2RY1        | 6.68E-05 | 0.25  |
| ILMN_1718297 | EML4         | 6.70E-05 | 0.62  |
| ILMN_1847308 |              | 6.70E-05 | -0.56 |
| ILMN_1686664 | MT2A         | 6.70E-05 | -0.70 |
| ILMN_1714167 | CYB5A        | 6.70E-05 | -0.65 |
| ILMN_2200917 | SLC4A7       | 6.71E-05 | 0.65  |
| ILMN_3280847 | LOC651697    | 6.71E-05 | 0.72  |
| ILMN_1754538 | C10orf58     | 6.78E-05 | -0.74 |
| ILMN_1697309 | NCF1         | 6.81E-05 | -0.90 |
| ILMN_2411282 | QSOX1        | 6.83E-05 | 0.79  |
| ILMN_1730622 | EVL          | 6.86E-05 | 0.98  |
| ILMN_2312194 | CYB5A        | 6.90E-05 | -0.55 |
| ILMN_1654112 | PAR6A        | 6.90E-05 | -0.37 |
| ILMN_1707077 | SORT1        | 6.92E-05 | 0.73  |
| ILMN_2380494 | ANXA11       | 6.99E-05 | 0.61  |
| ILMN_1751097 | CREB3L2      | 7.16E-05 | -0.54 |
| ILMN_2365248 | HVCN1        | 7.17E-05 | -0.63 |
| ILMN_1681754 | GGH          | 7.19E-05 | -0.59 |
| ILMN_2372915 | P2RY2        | 7.22E-05 | -0.51 |
| ILMN_2359800 | MS4A6A       | 7.22E-05 | 0.81  |
| ILMN_1668345 | OAF          | 7.46E-05 | -0.59 |
| ILMN_1734476 | KIF2A        | 7.61E-05 | 0.54  |
| ILMN_1796537 | FYB          | 7.77E-05 | -0.70 |
| ILMN_1785170 | ARMCX2       | 7.77E-05 | -0.50 |
| ILMN_1681252 | C17orf44     | 7.89E-05 | -0.45 |
| ILMN_1664828 | APOBEC3H     | 7.98E-05 | -0.51 |
| ILMN_1756071 | MFGE8        | 7.98E-05 | -0.53 |
| ILMN_1716468 | LOC152195    | 8.19E-05 | 0.39  |
| ILMN_1807540 | CBARA1       | 8.19E-05 | -0.52 |
| ILMN_2337263 | PKIB         | 8.25E-05 | 0.53  |
| ILMN_1808919 | HPS4         | 8.25E-05 | -0.40 |
| ILMN_1770610 | MERTK        | 8.38E-05 | -0.58 |
| ILMN_1652680 | LOC652616    | 8.38E-05 | -0.51 |
| ILMN_1692962 | CTDSP2       | 8.49E-05 | -0.53 |
| ILMN_1748473 | GIMAP4       | 8.49E-05 | -0.71 |
| ILMN_2329429 | GIMAP6       | 8.53E-05 | -0.49 |
| ILMN_1783443 | ALOX15       | 8.55E-05 | 0.67  |
| ILMN_1668526 | GVIN1        | 8.55E-05 | -0.52 |
| ILMN_1801833 | ARHGAP24     | 8.66E-05 | -0.42 |
| ILMN_3272741 | LOC100130520 | 8.66E-05 | 1.24  |
| ILMN_1772964 | CCL8         | 8.74E-05 | 0.92  |

|              |           |          |       |
|--------------|-----------|----------|-------|
| ILMN_2115862 | ESPNL     | 8.89E-05 | 0.28  |
| ILMN_2387505 | AP1B1     | 8.89E-05 | 0.35  |
| ILMN_1652716 | THEX1     | 8.91E-05 | 0.64  |
| ILMN_2408796 | C19orf28  | 8.91E-05 | 0.85  |
| ILMN_1671191 | UQCRC1    | 8.98E-05 | 0.63  |
| ILMN_1800787 | RFTN1     | 9.09E-05 | 0.65  |
| ILMN_1698213 | RBM3      | 9.09E-05 | 0.46  |
| ILMN_2110908 | MYC       | 9.16E-05 | 0.46  |
| ILMN_2374865 | ATF3      | 9.17E-05 | 0.68  |
| ILMN_1678627 | RUFY4     | 9.23E-05 | 0.33  |
| ILMN_1678961 | FRMD4A    | 9.28E-05 | 0.69  |
| ILMN_1711909 | EDEM2     | 9.28E-05 | -0.58 |
| ILMN_1815205 | LYZ       | 9.28E-05 | -0.69 |
| ILMN_1689836 | C5AR1     | 9.28E-05 | -0.84 |
| ILMN_2340259 | PDE4B     | 9.28E-05 | -0.66 |
| ILMN_1690262 | SNAI3     | 9.28E-05 | 0.51  |
| ILMN_1680314 | TXN       | 9.30E-05 | 0.63  |
| ILMN_1671478 | CKB       | 9.34E-05 | 0.71  |
| ILMN_1772218 | HLA-DPA1  | 9.36E-05 | 0.87  |
| ILMN_2367818 | CD40      | 9.40E-05 | 0.52  |
| ILMN_1738552 | SLC1A3    | 9.40E-05 | -0.60 |
| ILMN_1695829 | TTYH2     | 9.41E-05 | 0.68  |
| ILMN_2092850 | HPSE      | 9.44E-05 | -0.77 |
| ILMN_2052891 | PKD2      | 9.44E-05 | 0.77  |
| ILMN_1725791 | PTPLA     | 9.45E-05 | 0.75  |
| ILMN_1742981 | TUBA1A    | 9.51E-05 | 0.78  |
| ILMN_1769290 | TTC39B    | 9.51E-05 | 0.69  |
| ILMN_2091846 | FTHL2     | 9.55E-05 | -0.65 |
| ILMN_1770454 | AGRN      | 9.58E-05 | -0.41 |
| ILMN_1666924 | PINK1     | 9.74E-05 | -0.52 |
| ILMN_1780546 | OSM       | 9.80E-05 | -0.79 |
| ILMN_2374340 | PLAUR     | 9.96E-05 | -0.72 |
| ILMN_2146372 | KCTD6     | 1.00E-04 | 0.72  |
| ILMN_1740010 | PCNX      | 1.00E-04 | -0.65 |
| ILMN_1672662 | SLC20A1   | 1.01E-04 | 0.68  |
| ILMN_1718565 | CDKN1C    | 1.03E-04 | -0.32 |
| ILMN_1693394 | BCKDK     | 1.03E-04 | 0.54  |
| ILMN_1796490 | GRINA     | 1.03E-04 | -0.53 |
| ILMN_1767523 | IL17RB    | 1.03E-04 | 2.97  |
| ILMN_2170949 | SNX10     | 1.04E-04 | -0.69 |
| ILMN_1680139 | MAFF      | 1.06E-04 | 0.92  |
| ILMN_3234142 | LOC728855 | 1.06E-04 | -0.44 |
| ILMN_1726591 | CARD16    | 1.06E-04 | -0.48 |
| ILMN_1713829 | PTGES     | 1.06E-04 | -0.61 |
| ILMN_1740523 | KTN1      | 1.07E-04 | 0.40  |
| ILMN_1773906 | NCOA4     | 1.07E-04 | -0.65 |

|              |           |          |       |
|--------------|-----------|----------|-------|
| ILMN_3241378 | LOC728448 | 1.07E-04 | -0.31 |
| ILMN_1740418 | CYP27B1   | 1.07E-04 | 1.25  |
| ILMN_1790537 | C16orf75  | 1.08E-04 | 0.45  |
| ILMN_1730639 | SLC22A15  | 1.11E-04 | -0.42 |
| ILMN_2049536 | TRPV2     | 1.11E-04 | 0.56  |
| ILMN_1772686 | FGD3      | 1.11E-04 | -0.60 |
| ILMN_1768812 | FXVD6     | 1.12E-04 | -0.43 |
| ILMN_1733758 | MT1B      | 1.13E-04 | -0.40 |
| ILMN_1741165 | SLC11A1   | 1.14E-04 | -0.76 |
| ILMN_2358541 | RBMS1     | 1.14E-04 | 0.56  |
| ILMN_1697559 | G6PD      | 1.14E-04 | 0.76  |
| ILMN_1808590 | GUCY1A3   | 1.15E-04 | 0.28  |
| ILMN_1685676 | TTC9C     | 1.15E-04 | 0.45  |
| ILMN_1668374 | ITGB5     | 1.15E-04 | -0.57 |
| ILMN_1696622 | SLC38A6   | 1.16E-04 | 0.64  |
| ILMN_1764082 | MBOAT1    | 1.17E-04 | -0.45 |
| ILMN_1808354 | SLC4A7    | 1.17E-04 | 0.63  |
| ILMN_2227248 | SLAMF9    | 1.17E-04 | -0.53 |
| ILMN_1678353 | FARP1     | 1.18E-04 | 0.46  |
| ILMN_1713751 | ADAM19    | 1.18E-04 | 1.58  |
| ILMN_1733811 | JUP       | 1.18E-04 | -0.54 |
| ILMN_1742379 | IFT122    | 1.18E-04 | -0.56 |
| ILMN_2208413 | ARHGAP15  | 1.19E-04 | -0.63 |
| ILMN_1684227 | GPR146    | 1.23E-04 | 0.33  |
| ILMN_1802808 | LOC654103 | 1.23E-04 | -0.39 |
| ILMN_1802100 | ADAM28    | 1.23E-04 | -0.44 |
| ILMN_3251423 | CHDH      | 1.23E-04 | 0.78  |
| ILMN_1703946 | ADORA2B   | 1.23E-04 | -0.64 |
| ILMN_2407824 | ATP1B1    | 1.23E-04 | 0.64  |
| ILMN_1771026 | GARS      | 1.25E-04 | 0.56  |
| ILMN_2405684 | BIRC3     | 1.25E-04 | 0.67  |
| ILMN_1676480 | LOC654053 | 1.25E-04 | -0.78 |
| ILMN_1741727 | QPCT      | 1.25E-04 | 0.56  |
| ILMN_1805448 | EPB41L2   | 1.26E-04 | 0.47  |
| ILMN_2177090 | LOC200030 | 1.28E-04 | -0.61 |
| ILMN_1864166 |           | 1.28E-04 | 0.49  |
| ILMN_1657760 | SYT17     | 1.28E-04 | 0.37  |
| ILMN_1793517 | RASAL1    | 1.29E-04 | 0.64  |
| ILMN_3299520 | PRKCB     | 1.29E-04 | -0.43 |
| ILMN_1783956 | ATP8B4    | 1.30E-04 | -0.82 |
| ILMN_3192001 | CCL14     | 1.30E-04 | 0.36  |
| ILMN_1652409 | SPATA7    | 1.31E-04 | -0.53 |
| ILMN_2083243 | MNAT1     | 1.31E-04 | 0.38  |
| ILMN_1767934 | PCSK5     | 1.33E-04 | 0.56  |
| ILMN_2403534 | ALOX15    | 1.33E-04 | 0.69  |
| ILMN_1689160 | DPEP2     | 1.34E-04 | -0.51 |

|              |           |          |       |
|--------------|-----------|----------|-------|
| ILMN_1761531 | SGPL1     | 1.35E-04 | 0.53  |
| ILMN_1786041 | ASB9      | 1.35E-04 | -0.24 |
| ILMN_1813936 | DNAH3     | 1.35E-04 | 0.23  |
| ILMN_1751941 | LOC728772 | 1.36E-04 | 0.52  |
| ILMN_1861376 |           | 1.38E-04 | -0.49 |
| ILMN_1683127 | ZNF281    | 1.40E-04 | -0.65 |
| ILMN_1754114 | FLJ20021  | 1.44E-04 | -0.42 |
| ILMN_1766054 | ABCA1     | 1.49E-04 | -0.62 |
| ILMN_1737298 | MAT2A     | 1.55E-04 | 0.62  |
| ILMN_2408543 | PLAUR     | 1.56E-04 | -0.57 |
| ILMN_1779257 | CD40      | 1.56E-04 | 0.65  |
| ILMN_2373515 | HSP90AA1  | 1.59E-04 | 0.51  |
| ILMN_2155719 | NBPF10    | 1.60E-04 | -0.91 |
| ILMN_1706677 | MAPK1     | 1.62E-04 | 0.34  |
| ILMN_2307903 | VCAM1     | 1.63E-04 | 0.60  |
| ILMN_1772359 | LAPTM5    | 1.64E-04 | -0.50 |
| ILMN_1693552 | CD300A    | 1.64E-04 | 0.52  |
| ILMN_1700610 | CLEC7A    | 1.66E-04 | 0.49  |
| ILMN_1779147 | ENC1      | 1.68E-04 | -0.50 |
| ILMN_1707727 | ANGPTL4   | 1.70E-04 | 1.89  |
| ILMN_1758311 | NET1      | 1.71E-04 | 0.71  |
| ILMN_1672605 | C7orf41   | 1.74E-04 | -0.33 |
| ILMN_1668743 | LOC728069 | 1.74E-04 | -0.54 |
| ILMN_1798706 | EBI2      | 1.75E-04 | 0.78  |
| ILMN_2400922 | OPRL1     | 1.77E-04 | -0.62 |
| ILMN_2408576 | FAM129B   | 1.77E-04 | 0.67  |
| ILMN_2311166 | ITGB5     | 1.77E-04 | -0.61 |
| ILMN_1736567 | CD74      | 1.79E-04 | 0.60  |
| ILMN_3234615 | LOC728650 | 1.79E-04 | -0.53 |
| ILMN_1750674 | SDSL      | 1.80E-04 | -0.65 |
| ILMN_2415529 | CDK5RAP2  | 1.80E-04 | -0.40 |
| ILMN_2081883 | IQCK      | 1.80E-04 | -0.41 |
| ILMN_1711786 | NFE2      | 1.81E-04 | 0.88  |
| ILMN_1794072 | B3GAT1    | 1.82E-04 | -0.29 |
| ILMN_1734740 | GPR65     | 1.83E-04 | -0.55 |
| ILMN_1740493 | TRAF5     | 1.83E-04 | 0.74  |
| ILMN_1660847 | PFKFB3    | 1.83E-04 | -0.58 |
| ILMN_1778845 | FAM111A   | 1.85E-04 | -0.39 |
| ILMN_1723020 | MAP3K1    | 1.85E-04 | -0.47 |
| ILMN_1799106 | MOSC1     | 1.87E-04 | -0.51 |
| ILMN_1801766 | CCDC109B  | 1.88E-04 | -0.54 |
| ILMN_1659953 | 42250     | 1.88E-04 | 0.49  |
| ILMN_1801307 | TNFSF10   | 1.89E-04 | -0.69 |
| ILMN_1667371 | SLA       | 1.90E-04 | 0.82  |
| ILMN_1700967 | C3orf59   | 1.91E-04 | -0.46 |
| ILMN_1791396 | DGCR6     | 1.94E-04 | -0.50 |

|              |              |          |       |
|--------------|--------------|----------|-------|
| ILMN_1777233 | E2F2         | 1.95E-04 | -0.36 |
| ILMN_1712095 | FOXO4        | 1.95E-04 | -0.52 |
| ILMN_3241091 | LOC100130886 | 1.96E-04 | -0.60 |
| ILMN_1802458 | AGTRAP       | 1.96E-04 | -0.51 |
| ILMN_1800942 | KCTD6        | 1.98E-04 | 0.64  |
| ILMN_1725241 | GSTK1        | 1.98E-04 | 0.59  |
| ILMN_1772302 | MTHFS        | 2.00E-04 | -0.61 |
| ILMN_1763386 | BID          | 2.01E-04 | 0.55  |
| ILMN_1752562 | CXCL5        | 2.01E-04 | -1.28 |
| ILMN_1790014 | METRNL       | 2.02E-04 | 0.74  |
| ILMN_2215640 | TUBA3D       | 2.03E-04 | 0.47  |
| ILMN_1747744 | LHFPL2       | 2.04E-04 | -0.73 |
| ILMN_1861091 |              | 2.05E-04 | 0.23  |
| ILMN_1740875 | FPR2         | 2.07E-04 | -0.66 |
| ILMN_1699496 | PHF21A       | 2.09E-04 | -0.65 |
| ILMN_2395856 | TMEM218      | 2.13E-04 | -0.50 |
| ILMN_1728684 | PELP1        | 2.14E-04 | 0.54  |
| ILMN_1779547 | HPSE         | 2.14E-04 | -0.96 |
| ILMN_1798006 | ANKRD35      | 2.14E-04 | -0.45 |
| ILMN_1800733 | MANBA        | 2.16E-04 | -0.53 |
| ILMN_2230892 | IL10RB       | 2.17E-04 | -0.49 |
| ILMN_1779015 | ZNF467       | 2.17E-04 | -0.71 |
| ILMN_1797731 | MS4A6A       | 2.18E-04 | 0.66  |
| ILMN_1784238 | SEC22B       | 2.18E-04 | -0.62 |
| ILMN_1714602 | CD86         | 2.18E-04 | 0.80  |
| ILMN_2326512 | CASP1        | 2.18E-04 | -0.46 |
| ILMN_2319000 | MATK         | 2.18E-04 | 0.73  |
| ILMN_1719627 | SLC27A3      | 2.19E-04 | 0.55  |
| ILMN_1735461 | DDX21        | 2.19E-04 | 0.56  |
| ILMN_1738523 | MYD88        | 2.19E-04 | -0.56 |
| ILMN_1718961 | BNIP3L       | 2.20E-04 | -0.46 |
| ILMN_1689518 | PECAM1       | 2.27E-04 | -0.57 |
| ILMN_1680902 | LOC284998    | 2.28E-04 | 0.27  |
| ILMN_1769383 | GIMAP5       | 2.28E-04 | -0.56 |
| ILMN_1758673 | SLC44A1      | 2.28E-04 | -0.59 |
| ILMN_1682332 | GYPC         | 2.29E-04 | -0.59 |
| ILMN_2324375 | CHCHD7       | 2.32E-04 | 0.39  |
| ILMN_1764380 | GLTP         | 2.32E-04 | -0.61 |
| ILMN_2323944 | FAM110A      | 2.36E-04 | -0.46 |
| ILMN_2157075 | LRCH4        | 2.36E-04 | -0.50 |
| ILMN_2092441 | LRP12        | 2.36E-04 | 0.22  |
| ILMN_1742167 | TUBA1C       | 2.36E-04 | 0.60  |
| ILMN_1664644 | ATG16L2      | 2.41E-04 | -0.38 |
| ILMN_3249667 | LOC100133678 | 2.43E-04 | 0.97  |
| ILMN_1800951 | ATXN1        | 2.47E-04 | 0.46  |
| ILMN_1807300 | PKD2         | 2.47E-04 | 0.39  |



|              |              |          |       |
|--------------|--------------|----------|-------|
| ILMN_3307659 | SFT2D2       | 2.49E-04 | 0.46  |
| ILMN_1680109 | COL4A3BP     | 2.49E-04 | -0.51 |
| ILMN_1712687 | PAK2         | 2.49E-04 | 0.50  |
| ILMN_2080611 | PDSS1        | 2.53E-04 | 0.41  |
| ILMN_2372413 | BID          | 2.56E-04 | 0.56  |
| ILMN_1657837 | ZC3H8        | 2.59E-04 | 0.50  |
| ILMN_1662340 | ZNF358       | 2.65E-04 | -0.44 |
| ILMN_1722738 | ROGDI        | 2.65E-04 | 0.38  |
| ILMN_1788160 | KIF5B        | 2.65E-04 | 0.43  |
| ILMN_1754076 | CACNA2D3     | 2.65E-04 | -1.57 |
| ILMN_1765557 | OLFML2B      | 2.65E-04 | -0.52 |
| ILMN_2072101 | C4orf49      | 2.65E-04 | -0.18 |
| ILMN_1667748 | ANKRD33      | 2.66E-04 | -0.53 |
| ILMN_1683682 | DAGLA        | 2.68E-04 | 0.45  |
| ILMN_1811624 | THADA        | 2.72E-04 | -0.43 |
| ILMN_1730628 | RNASE2       | 2.73E-04 | -1.04 |
| ILMN_2391900 | SLC26A6      | 2.75E-04 | 0.42  |
| ILMN_1771385 | GBP4         | 2.75E-04 | -0.57 |
| ILMN_1768035 | MMP12        | 2.77E-04 | 0.44  |
| ILMN_1719695 | NFKBIZ       | 2.78E-04 | -0.44 |
| ILMN_1716272 | KBTBD8       | 2.80E-04 | 0.37  |
| ILMN_3235514 | GPR183       | 2.80E-04 | 0.49  |
| ILMN_1696317 | CACNA2D4     | 2.80E-04 | -0.39 |
| ILMN_1813374 | C19orf28     | 2.80E-04 | 0.98  |
| ILMN_2265995 | NBPF3        | 2.81E-04 | -0.43 |
| ILMN_2325347 | B3GALNT1     | 2.82E-04 | 0.61  |
| ILMN_1810725 | FAM129A      | 2.82E-04 | 0.52  |
| ILMN_1767900 | LGI2         | 2.82E-04 | -0.19 |
| ILMN_1766165 | SNCA         | 2.83E-04 | -0.44 |
| ILMN_3275771 | LOC642567    | 2.83E-04 | -0.76 |
| ILMN_1758895 | CTSK         | 2.83E-04 | -0.58 |
| ILMN_3237270 | LOC100133609 | 2.84E-04 | 0.44  |
| ILMN_2134538 | FTHL11       | 2.86E-04 | -0.54 |
| ILMN_1760201 | DNMT1        | 2.86E-04 | 0.67  |
| ILMN_1769013 | ASGR1        | 2.86E-04 | -0.54 |
| ILMN_1757406 | HIST1H1C     | 2.87E-04 | -0.52 |
| ILMN_2211003 | GAS2L3       | 2.88E-04 | 0.52  |
| ILMN_2199768 | SLITRK4      | 2.88E-04 | -0.50 |
| ILMN_2120273 | AP1S2        | 2.88E-04 | -0.57 |
| ILMN_1778177 | ZNF207       | 2.93E-04 | 0.49  |
| ILMN_1689088 | COLEC12      | 2.93E-04 | -0.95 |
| ILMN_1715024 | LSS          | 2.93E-04 | -0.43 |
| ILMN_1655930 | ELL2         | 2.94E-04 | -0.73 |
| ILMN_1727689 | TNFAIP2      | 2.94E-04 | -0.35 |
| ILMN_2073202 | MEI1         | 2.94E-04 | -0.39 |
| ILMN_2157441 | HLA-DRA      | 2.94E-04 | 0.69  |

|              |              |          |       |
|--------------|--------------|----------|-------|
| ILMN_1752510 | FAM13A       | 2.94E-04 | -0.63 |
| ILMN_1811702 | GRN          | 2.95E-04 | -0.44 |
| ILMN_2195821 | C5orf41      | 2.95E-04 | -0.50 |
| ILMN_2326509 | CASP1        | 2.97E-04 | -0.49 |
| ILMN_1872568 |              | 3.01E-04 | 0.28  |
| ILMN_2089977 | FKBP9L       | 3.01E-04 | -0.41 |
| ILMN_1713182 | LOC653879    | 3.08E-04 | -0.33 |
| ILMN_2148847 | AKIRIN2      | 3.10E-04 | 0.54  |
| ILMN_3254984 | LOC100129759 | 3.10E-04 | 0.36  |
| ILMN_1718063 | LIPA         | 3.10E-04 | 0.66  |
| ILMN_1717809 | RNF24        | 3.21E-04 | 0.45  |
| ILMN_1788180 | RAB13        | 3.22E-04 | -0.57 |
| ILMN_1764577 | MFNG         | 3.24E-04 | 0.74  |
| ILMN_1656145 | GOT1         | 3.24E-04 | 0.46  |
| ILMN_3235221 | LOC644936    | 3.24E-04 | 0.62  |
| ILMN_1720083 | EHD4         | 3.25E-04 | 0.58  |
| ILMN_3246538 | LOC100133866 | 3.26E-04 | -0.68 |
| ILMN_2410262 | MTMR14       | 3.29E-04 | 0.44  |
| ILMN_1803256 | STOX2        | 3.29E-04 | -0.45 |
| ILMN_1763609 | SLC22A16     | 3.33E-04 | 0.60  |
| ILMN_3246560 | EMB          | 3.33E-04 | 0.23  |
| ILMN_1701613 | RARRES3      | 3.37E-04 | -0.63 |
| ILMN_1672834 | SSH2         | 3.37E-04 | -0.40 |
| ILMN_1784661 | TMEM2        | 3.41E-04 | -0.64 |
| ILMN_1708537 | RBPJ         | 3.43E-04 | 0.54  |
| ILMN_1742544 | MEF2C        | 3.43E-04 | -0.47 |
| ILMN_1655702 | ABHD5        | 3.47E-04 | -0.52 |
| ILMN_3266606 | FABP5L2      | 3.47E-04 | 0.56  |
| ILMN_1657977 | MSRB2        | 3.48E-04 | -0.53 |
| ILMN_1662640 | C20orf127    | 3.48E-04 | -0.70 |
| ILMN_1712950 | PFN1         | 3.50E-04 | 0.56  |
| ILMN_1786429 | P2RY5        | 3.54E-04 | -0.61 |
| ILMN_1692742 | DENND3       | 3.55E-04 | -0.27 |
| ILMN_2373285 | MSR1         | 3.55E-04 | -0.50 |
| ILMN_2309180 | SMARCD3      | 3.57E-04 | -0.41 |
| ILMN_1748591 | ODC1         | 3.57E-04 | 0.43  |
| ILMN_3244286 | TANC2        | 3.58E-04 | -0.31 |
| ILMN_1764769 | VWA5A        | 3.58E-04 | -0.42 |
| ILMN_2316386 | GPBAR1       | 3.60E-04 | -0.55 |
| ILMN_1772876 | ZNF395       | 3.60E-04 | -0.44 |
| ILMN_1779252 | TRIM22       | 3.60E-04 | -0.61 |
| ILMN_1667260 | MAPK3        | 3.61E-04 | -0.50 |
| ILMN_2149494 | NPL          | 3.62E-04 | -0.59 |
| ILMN_2350183 | ST5          | 3.63E-04 | -0.21 |
| ILMN_2201966 | N4BP1        | 3.66E-04 | 0.38  |
| ILMN_1787265 | ZNF503       | 3.71E-04 | -0.51 |

|              |              |          |       |
|--------------|--------------|----------|-------|
| ILMN_1812973 | RRP1B        | 3.77E-04 | 0.32  |
| ILMN_1717163 | F13A1        | 3.83E-04 | 2.00  |
| ILMN_2387952 | FAM134B      | 4.07E-04 | -0.50 |
| ILMN_1669046 | FOXQ1        | 4.08E-04 | 1.64  |
| ILMN_1700695 | SLC44A1      | 4.08E-04 | -0.57 |
| ILMN_1810199 | ASRGL1       | 4.08E-04 | -0.33 |
| ILMN_1815086 | NINJ1        | 4.09E-04 | -0.43 |
| ILMN_1804822 | SRXN1        | 4.10E-04 | 0.57  |
| ILMN_3272603 | FAM60A       | 4.10E-04 | 0.44  |
| ILMN_3236239 | LOC100129550 | 4.11E-04 | -0.61 |
| ILMN_1803906 | ETV2         | 4.13E-04 | -0.29 |
| ILMN_3200362 | LOC727908    | 4.17E-04 | -0.56 |
| ILMN_1680856 | MAMLD1       | 4.18E-04 | -0.38 |
| ILMN_1738010 | CTNS         | 4.18E-04 | 0.74  |
| ILMN_2199439 | CA2          | 4.18E-04 | 0.98  |
| ILMN_1730454 | FOLR3        | 4.18E-04 | -0.68 |
| ILMN_1767448 | LHFP         | 4.18E-04 | 0.84  |
| ILMN_2153332 | ATXN1        | 4.22E-04 | 0.58  |
| ILMN_1766411 | AP1S2        | 4.25E-04 | -0.61 |
| ILMN_1662799 | GPSM3        | 4.27E-04 | -0.42 |
| ILMN_1781536 | FAH          | 4.29E-04 | -0.63 |
| ILMN_1802096 | ABTB1        | 4.29E-04 | -0.60 |
| ILMN_3230608 | NBPF8        | 4.30E-04 | -0.68 |
| ILMN_1653498 | IGSF6        | 4.30E-04 | 0.64  |
| ILMN_2215631 | OTUD6B       | 4.32E-04 | 0.40  |
| ILMN_1687757 | AKR1C4       | 4.33E-04 | -0.36 |
| ILMN_1769876 | TBC1D2       | 4.33E-04 | -0.47 |
| ILMN_2402341 | MAPK3        | 4.33E-04 | -0.33 |
| ILMN_1704873 | TCEB1        | 4.34E-04 | 0.56  |
| ILMN_1746368 | SELT         | 4.35E-04 | 0.45  |
| ILMN_2330966 | PTK2B        | 4.38E-04 | -0.37 |
| ILMN_2117623 | PLXNC1       | 4.41E-04 | -0.33 |
| ILMN_1739751 | SLC26A11     | 4.41E-04 | 0.66  |
| ILMN_2054297 | PTGS2        | 4.42E-04 | -0.68 |
| ILMN_1805377 | ZP3          | 4.42E-04 | -0.50 |
| ILMN_1770290 | CNN2         | 4.42E-04 | 0.56  |
| ILMN_1695354 | BMF          | 4.43E-04 | -0.32 |
| ILMN_1797021 | TMEM86A      | 4.48E-04 | -0.36 |
| ILMN_2148819 | TUBA1A       | 4.50E-04 | 0.59  |
| ILMN_2316278 | MAGED4B      | 4.51E-04 | -0.36 |
| ILMN_3247848 | NCRNA00085   | 4.55E-04 | -0.37 |
| ILMN_2232121 | GPR65        | 4.68E-04 | -0.50 |
| ILMN_3243351 | LOC646214    | 4.72E-04 | 0.40  |
| ILMN_1675542 | LOC729148    | 4.72E-04 | -0.42 |
| ILMN_2087646 | HLX          | 4.72E-04 | 0.49  |
| ILMN_1781174 | KIAA1009     | 4.73E-04 | -0.32 |

|              |           |          |       |
|--------------|-----------|----------|-------|
| ILMN_2073758 | MMP12     | 4.74E-04 | 0.58  |
| ILMN_2099277 | HTRA4     | 4.79E-04 | -0.50 |
| ILMN_1677827 | TLR7      | 4.86E-04 | -0.86 |
| ILMN_1906423 |           | 4.86E-04 | 1.18  |
| ILMN_1720889 | SC4MOL    | 4.86E-04 | -0.48 |
| ILMN_1751851 | CECR1     | 4.89E-04 | -0.51 |
| ILMN_2103107 | ADAMDEC1  | 4.91E-04 | -0.50 |
| ILMN_1733324 | ITGB3     | 4.91E-04 | 0.28  |
| ILMN_1743032 | CTSS      | 4.95E-04 | -0.51 |
| ILMN_3247723 | NOP16     | 4.96E-04 | 0.30  |
| ILMN_1809433 | XBP1      | 4.96E-04 | 0.80  |
| ILMN_1838313 |           | 4.96E-04 | 0.72  |
| ILMN_1733937 | MMD       | 4.96E-04 | 0.78  |
| ILMN_3251436 | DENND4C   | 4.97E-04 | 0.44  |
| ILMN_1709820 | AOAH      | 5.01E-04 | -0.54 |
| ILMN_1729915 | PILRA     | 5.03E-04 | -0.49 |
| ILMN_1701461 | TIMP3     | 5.03E-04 | 0.39  |
| ILMN_1692546 | VNN2      | 5.05E-04 | -0.25 |
| ILMN_1744937 | PTPRM     | 5.05E-04 | -0.39 |
| ILMN_1775170 | MT1X      | 5.05E-04 | -0.65 |
| ILMN_1672124 | C4orf18   | 5.07E-04 | -0.45 |
| ILMN_1658337 | AKIRIN1   | 5.07E-04 | 0.56  |
| ILMN_1654630 | FAM193B   | 5.07E-04 | -0.32 |
| ILMN_1802799 | AKIRIN1   | 5.07E-04 | 0.54  |
| ILMN_3250257 | ACVRL1    | 5.08E-04 | -0.48 |
| ILMN_1793950 | P704P     | 5.09E-04 | 0.38  |
| ILMN_1758400 | GRIN3A    | 5.12E-04 | -0.33 |
| ILMN_1727709 | GPBAR1    | 5.12E-04 | -0.53 |
| ILMN_1910948 |           | 5.13E-04 | 0.40  |
| ILMN_1766169 | BCAT1     | 5.15E-04 | -0.57 |
| ILMN_2157099 | CCNA1     | 5.15E-04 | 0.63  |
| ILMN_1653529 | TEX10     | 5.18E-04 | 0.38  |
| ILMN_1701911 | C5orf20   | 5.19E-04 | 0.46  |
| ILMN_3210946 | LOC645969 | 5.19E-04 | 0.51  |
| ILMN_2082324 | SLC36A4   | 5.19E-04 | -0.36 |
| ILMN_1657862 | AHCY      | 5.19E-04 | 0.95  |
| ILMN_2146761 | FABP5     | 5.19E-04 | 0.52  |
| ILMN_1751464 | TNFSF9    | 5.23E-04 | -0.40 |
| ILMN_2049184 | DNASE1L3  | 5.24E-04 | 0.88  |
| ILMN_1821176 |           | 5.27E-04 | -0.49 |
| ILMN_1724250 | GRN       | 5.29E-04 | -0.49 |
| ILMN_1654289 | ELK1      | 5.29E-04 | 0.44  |
| ILMN_2405305 | ARNTL     | 5.33E-04 | 0.42  |
| ILMN_1787718 | SLC27A1   | 5.33E-04 | -0.60 |
| ILMN_1768031 | DEDD2     | 5.33E-04 | -0.54 |
| ILMN_1693452 | GAL3ST4   | 5.33E-04 | -1.07 |

|              |           |          |       |
|--------------|-----------|----------|-------|
| ILMN_1781867 | FOXD4L1   | 5.33E-04 | 0.94  |
| ILMN_1660549 | GPR177    | 5.33E-04 | -0.51 |
| ILMN_1739428 | IFIT2     | 5.33E-04 | -0.52 |
| ILMN_2334296 | IL18BP    | 5.33E-04 | 0.66  |
| ILMN_1755303 | ZNF217    | 5.33E-04 | 0.40  |
| ILMN_1789702 | GBE1      | 5.34E-04 | -0.42 |
| ILMN_1716105 | NLRP12    | 5.38E-04 | -0.41 |
| ILMN_3236904 | LOC648740 | 5.43E-04 | 0.27  |
| ILMN_1724066 | PLCB2     | 5.44E-04 | 0.55  |
| ILMN_3187680 | ACCS      | 5.45E-04 | -0.42 |
| ILMN_1752592 | HLA-DRB4  | 5.52E-04 | 0.72  |
| ILMN_1669703 | TNK2      | 5.53E-04 | -0.45 |
| ILMN_1666364 | COQ10A    | 5.55E-04 | -0.39 |
| ILMN_2214678 | MXD1      | 5.55E-04 | -0.60 |
| ILMN_1705247 | ACSL5     | 5.55E-04 | 0.41  |
| ILMN_2258004 | METRNL    | 5.58E-04 | 0.46  |
| ILMN_1720373 | SLC7A5    | 5.58E-04 | 0.89  |
| ILMN_1910120 | LOC730092 | 5.58E-04 | 0.40  |
| ILMN_1808661 | TOMM5     | 5.58E-04 | 0.49  |
| ILMN_1665331 | AMT       | 5.58E-04 | -0.48 |
| ILMN_1729374 | ETFB      | 5.59E-04 | 0.42  |
| ILMN_1694810 | PANX2     | 5.63E-04 | 0.56  |
| ILMN_1827736 |           | 5.65E-04 | -0.44 |
| ILMN_1812759 | GCH1      | 5.65E-04 | -0.40 |
| ILMN_1673676 | SNX5      | 5.68E-04 | 0.50  |
| ILMN_1746137 | ST7       | 5.72E-04 | 0.55  |
| ILMN_2192316 | TOP1      | 5.87E-04 | 0.32  |
| ILMN_1683146 | FTH1      | 5.87E-04 | -0.59 |
| ILMN_1665736 | LOC648024 | 5.90E-04 | 0.60  |
| ILMN_2379788 | HIF1A     | 5.90E-04 | -0.54 |
| ILMN_1759175 | DUSP10    | 5.93E-04 | -0.27 |
| ILMN_1860638 |           | 5.97E-04 | -0.47 |
| ILMN_1804735 | CBS       | 5.99E-04 | 0.59  |
| ILMN_1803609 | XKR3      | 6.00E-04 | 0.29  |
| ILMN_1751161 | COL7A1    | 6.01E-04 | 0.41  |
| ILMN_1793410 | SNTB1     | 6.13E-04 | -0.68 |
| ILMN_1713143 | MRPL3     | 6.19E-04 | 0.45  |
| ILMN_1680579 | ATP2B4    | 6.19E-04 | -0.43 |
| ILMN_1781416 | FRAT1     | 6.19E-04 | -0.21 |
| ILMN_1811367 | MAT2B     | 6.19E-04 | 0.44  |
| ILMN_1807423 | IGF2BP3   | 6.19E-04 | -0.36 |
| ILMN_1775703 | TRAPPC6A  | 6.26E-04 | -0.39 |
| ILMN_1781388 | PGM5      | 6.30E-04 | -0.45 |
| ILMN_1704961 | ACTG1     | 6.34E-04 | 0.66  |
| ILMN_1671557 | PHLDA2    | 6.53E-04 | 0.22  |
| ILMN_2338116 | TRAF5     | 6.57E-04 | 0.35  |

|              |              |          |       |
|--------------|--------------|----------|-------|
| ILMN_2156172 | HK2          | 6.58E-04 | -0.43 |
| ILMN_1671337 | SLC2A5       | 6.67E-04 | -0.73 |
| ILMN_2388177 | SPATA7       | 6.72E-04 | -0.28 |
| ILMN_2246882 | SP140        | 6.81E-04 | -0.35 |
| ILMN_1772703 | OTUD6B       | 6.81E-04 | 0.27  |
| ILMN_1692123 | ELOVL3       | 6.81E-04 | -0.19 |
| ILMN_2214997 | LRRFIP1      | 6.81E-04 | 0.55  |
| ILMN_1705663 | DMXL2        | 6.82E-04 | -0.43 |
| ILMN_2150196 | LRRC25       | 6.87E-04 | -0.39 |
| ILMN_1749006 | RCSD1        | 6.87E-04 | -0.44 |
| ILMN_1723520 | CD1A         | 6.87E-04 | 0.28  |
| ILMN_1681644 | BIRC3        | 6.91E-04 | 0.26  |
| ILMN_1743130 | PTGFRN       | 6.91E-04 | 0.50  |
| ILMN_2323992 | CLEC7A       | 6.94E-04 | 0.48  |
| ILMN_1693233 | KIAA0513     | 6.95E-04 | -0.42 |
| ILMN_1671260 | GPR177       | 7.11E-04 | -0.63 |
| ILMN_2404154 | SERPINA1     | 7.12E-04 | -0.45 |
| ILMN_2401253 | FAM13A       | 7.15E-04 | -0.29 |
| ILMN_2174574 | HNRNPA3P1    | 7.15E-04 | -0.34 |
| ILMN_3244014 | LOC100131967 | 7.16E-04 | -0.41 |
| ILMN_1805662 | FBXW5        | 7.16E-04 | -0.44 |
| ILMN_1722981 | TLR5         | 7.16E-04 | -0.48 |
| ILMN_1681067 | PIK3R5       | 7.16E-04 | 0.21  |
| ILMN_1768814 | KLHL6        | 7.20E-04 | -0.41 |
| ILMN_1807277 | IFI30        | 7.20E-04 | -0.39 |
| ILMN_2094061 | IMPA2        | 7.24E-04 | -0.39 |
| ILMN_3219455 | LOC644745    | 7.25E-04 | 0.54  |
| ILMN_1774836 | PLOD3        | 7.28E-04 | 0.44  |
| ILMN_1810191 | PLA2G4C      | 7.30E-04 | -0.49 |
| ILMN_1669599 | DENND4C      | 7.32E-04 | 0.49  |
| ILMN_1740505 | SGMS1        | 7.32E-04 | -0.30 |
| ILMN_1776121 | MGC42367     | 7.40E-04 | -0.28 |
| ILMN_1838310 |              | 7.40E-04 | 0.29  |
| ILMN_1719696 | PLD1         | 7.46E-04 | -0.51 |
| ILMN_1744795 | TBL1X        | 7.46E-04 | -0.44 |
| ILMN_2234697 | BEX1         | 7.46E-04 | -0.81 |
| ILMN_2170814 | LAMP3        | 7.46E-04 | 0.85  |
| ILMN_1654370 | TESK2        | 7.51E-04 | -0.23 |
| ILMN_1787251 | DAAM1        | 7.51E-04 | 0.58  |
| ILMN_1692219 | RAB11FIP1    | 7.55E-04 | -0.52 |
| ILMN_1654518 | LRCH4        | 7.55E-04 | -0.49 |
| ILMN_1668822 | BATF         | 7.61E-04 | 0.38  |
| ILMN_1787529 | C3AR1        | 7.63E-04 | -0.47 |
| ILMN_2061732 | YRDC         | 7.67E-04 | 0.43  |
| ILMN_1776188 | MAP1LC3A     | 7.68E-04 | -0.47 |
| ILMN_1715969 | SLC25A37     | 7.68E-04 | -0.28 |

|              |           |          |       |
|--------------|-----------|----------|-------|
| ILMN_1707763 | ST7       | 7.78E-04 | 0.47  |
| ILMN_3249501 | ZNF697    | 7.90E-04 | 0.34  |
| ILMN_1748915 | S100A12   | 8.01E-04 | -0.33 |
| ILMN_1726245 | TGFBR2    | 8.05E-04 | -0.45 |
| ILMN_2357438 | AURKA     | 8.12E-04 | 0.40  |
| ILMN_3206343 | LOC644914 | 8.12E-04 | -0.56 |
| ILMN_3243366 | C2orf55   | 8.12E-04 | -0.27 |
| ILMN_1723874 | MRPS6     | 8.16E-04 | 0.44  |
| ILMN_1707124 | TFPI      | 8.20E-04 | -0.64 |
| ILMN_3251341 | TUBA1C    | 8.26E-04 | 0.45  |
| ILMN_1723846 | FAM119B   | 8.26E-04 | 0.62  |
| ILMN_2405521 | MTHFD2    | 8.30E-04 | 0.60  |
| ILMN_1677305 | PVR       | 8.42E-04 | 0.41  |
| ILMN_3272500 | IFI27L1   | 8.48E-04 | -0.42 |
| ILMN_1694268 | HES6      | 8.51E-04 | 0.71  |
| ILMN_1760247 | CD70      | 8.52E-04 | -0.34 |
| ILMN_1702175 | ST7       | 8.55E-04 | 0.43  |
| ILMN_2185884 | DHRS4     | 8.58E-04 | -0.60 |
| ILMN_1714278 | C9orf30   | 8.63E-04 | 0.43  |
| ILMN_1726327 | AMY1B     | 8.70E-04 | 0.35  |
| ILMN_1738095 | PER2      | 8.71E-04 | 0.40  |
| ILMN_1702487 | SGK       | 8.75E-04 | -0.41 |
| ILMN_2373763 | CASP7     | 8.81E-04 | 0.51  |
| ILMN_1799744 | GALC      | 8.81E-04 | -0.58 |
| ILMN_1694400 | MSR1      | 8.82E-04 | -0.48 |
| ILMN_3290497 | LOC643863 | 8.88E-04 | -0.53 |
| ILMN_2396020 | DUSP6     | 8.90E-04 | -0.52 |
| ILMN_1770161 | BST1      | 8.91E-04 | -0.39 |
| ILMN_2375992 | SPINT1    | 8.96E-04 | 0.44  |
| ILMN_1703324 | PDSS1     | 8.97E-04 | 0.36  |
| ILMN_3232894 | CNRIP1    | 8.97E-04 | -0.46 |
| ILMN_1797974 | AIG1      | 8.97E-04 | 0.43  |
| ILMN_1674038 | CTSD      | 9.05E-04 | -0.51 |
| ILMN_1755873 | EMR3      | 9.18E-04 | -0.39 |
| ILMN_1756849 | HIST1H2AE | 9.23E-04 | -0.16 |
| ILMN_1715131 | CCR7      | 9.23E-04 | 0.52  |
| ILMN_1654385 | ASB13     | 9.23E-04 | -0.32 |
| ILMN_1715214 | PTPN7     | 9.23E-04 | 0.44  |
| ILMN_1691508 | PLAUR     | 9.24E-04 | -0.46 |
| ILMN_1791726 | TUBB3     | 9.25E-04 | 0.47  |
| ILMN_1703891 | TBC1D9    | 9.26E-04 | -0.48 |
| ILMN_1796755 | ITGB5     | 9.26E-04 | -0.38 |
| ILMN_2373831 | BTN3A3    | 9.27E-04 | -0.43 |
| ILMN_2043816 | ARPC5L    | 9.32E-04 | 0.46  |
| ILMN_1699644 | 42066     | 9.40E-04 | 0.44  |
| ILMN_2408987 | SMARCD3   | 9.44E-04 | -0.16 |

|              |              |          |       |
|--------------|--------------|----------|-------|
| ILMN_1729019 | 42254        | 9.44E-04 | 0.36  |
| ILMN_1737184 | CDCA7        | 9.46E-04 | 0.20  |
| ILMN_1777296 | ACTB         | 9.46E-04 | 0.56  |
| ILMN_2144088 | FDFT1        | 9.46E-04 | -0.42 |
| ILMN_1771664 | CLEC4E       | 9.48E-04 | -0.42 |
| ILMN_2053281 | C14orf149    | 9.49E-04 | 0.34  |
| ILMN_1740772 | APBB3        | 9.50E-04 | -0.42 |
| ILMN_1915188 |              | 9.53E-04 | 0.36  |
| ILMN_1658926 | NOTCH3       | 9.55E-04 | -0.42 |
| ILMN_1756541 | MXD4         | 9.58E-04 | -0.52 |
| ILMN_1782560 | CD86         | 9.58E-04 | 0.68  |
| ILMN_1674183 | MT1JP        | 9.62E-04 | -0.41 |
| ILMN_2392569 | FPR2         | 9.62E-04 | -0.42 |
| ILMN_1784651 | NAGA         | 9.62E-04 | 0.28  |
| ILMN_1724181 | IL15         | 9.63E-04 | -0.38 |
| ILMN_2113535 | PCYOX1       | 9.67E-04 | -0.34 |
| ILMN_2043109 | TOP1P2       | 9.72E-04 | 0.41  |
| ILMN_1786357 | CENTD2       | 9.73E-04 | -0.35 |
| ILMN_1714397 | CRYL1        | 9.73E-04 | -0.31 |
| ILMN_1659206 | RARA         | 1.00E-03 | 0.43  |
| ILMN_1669523 | FOS          | 1.01E-03 | -0.52 |
| ILMN_1700660 | RNF135       | 1.01E-03 | -0.41 |
| ILMN_1752520 | SLFN11       | 1.01E-03 | -0.50 |
| ILMN_2230035 | BBS2         | 1.01E-03 | -0.38 |
| ILMN_2370872 | GRINA        | 1.02E-03 | -0.43 |
| ILMN_2340052 | NCOR2        | 1.02E-03 | 0.73  |
| ILMN_1733680 | AZI2         | 1.02E-03 | -0.51 |
| ILMN_1663390 | CDC20        | 1.02E-03 | 0.17  |
| ILMN_1726809 | BHLHB3       | 1.02E-03 | -0.43 |
| ILMN_1667966 | C1orf24      | 1.03E-03 | 0.62  |
| ILMN_1728581 | C3orf18      | 1.04E-03 | 0.20  |
| ILMN_1665357 | EPS15        | 1.04E-03 | 0.34  |
| ILMN_1663685 | DGCR6        | 1.04E-03 | -0.49 |
| ILMN_1801584 | CXCR4        | 1.04E-03 | 0.49  |
| ILMN_1803779 | AP2A2        | 1.05E-03 | 0.41  |
| ILMN_2335718 | HNRNPAB      | 1.06E-03 | 0.39  |
| ILMN_1655796 | 42066        | 1.06E-03 | 0.40  |
| ILMN_1735432 | ISCU         | 1.06E-03 | -0.37 |
| ILMN_1747344 | IL3RA        | 1.07E-03 | 1.21  |
| ILMN_2401779 | FAM102A      | 1.07E-03 | 0.34  |
| ILMN_3236367 | IFFO2        | 1.08E-03 | 0.18  |
| ILMN_1748751 | NLF2         | 1.08E-03 | 0.28  |
| ILMN_1768505 | IL13RA1      | 1.09E-03 | -0.53 |
| ILMN_2380237 | C1QTNF1      | 1.09E-03 | 0.56  |
| ILMN_1725675 | ABCC6        | 1.09E-03 | -0.19 |
| ILMN_3260111 | LOC100129269 | 1.10E-03 | 0.70  |



|              |           |          |       |
|--------------|-----------|----------|-------|
| ILMN_1662795 | CA2       | 1.10E-03 | 0.99  |
| ILMN_1780132 | PELI2     | 1.10E-03 | -0.42 |
| ILMN_1682404 | SETMAR    | 1.10E-03 | 0.35  |
| ILMN_1811909 | LOC402221 | 1.10E-03 | 0.59  |
| ILMN_2379967 | FCAR      | 1.11E-03 | -0.38 |
| ILMN_1698404 | ERN1      | 1.11E-03 | -0.38 |
| ILMN_1682799 | STAMBPL1  | 1.11E-03 | 0.54  |
| ILMN_1738921 | ACAA1     | 1.11E-03 | -0.42 |
| ILMN_1814998 | FKSG30    | 1.12E-03 | 0.57  |
| ILMN_1801205 | GPNMB     | 1.12E-03 | -0.43 |
| ILMN_2400644 | SRGAP3    | 1.12E-03 | -0.18 |
| ILMN_3250273 | TMOD2     | 1.13E-03 | -0.19 |
| ILMN_2363065 | RTN3      | 1.13E-03 | -0.41 |
| ILMN_1769615 | FLRT2     | 1.14E-03 | -0.51 |
| ILMN_1763228 | MEF2D     | 1.15E-03 | -0.48 |
| ILMN_1766637 | GLA       | 1.16E-03 | -0.42 |
| ILMN_1714433 | MARCKSL1  | 1.16E-03 | 0.96  |
| ILMN_2339705 | MED8      | 1.17E-03 | 0.35  |
| ILMN_1667711 | HRASLS3   | 1.18E-03 | -0.50 |
| ILMN_1654389 | LOC728744 | 1.18E-03 | -0.28 |
| ILMN_1913060 |           | 1.18E-03 | -0.45 |
| ILMN_2241953 | PILRA     | 1.18E-03 | -0.52 |
| ILMN_2106449 | PLEKHF2   | 1.18E-03 | 0.30  |
| ILMN_2338997 | PTP4A2    | 1.19E-03 | -0.36 |
| ILMN_1712431 | FAM113B   | 1.19E-03 | -0.50 |
| ILMN_1666976 | PLD3      | 1.20E-03 | -0.37 |
| ILMN_2364062 | THOC4     | 1.21E-03 | 0.28  |
| ILMN_1782070 | NPL       | 1.21E-03 | -0.49 |
| ILMN_1701441 | LPAR1     | 1.22E-03 | -0.46 |
| ILMN_1699631 | GATS      | 1.23E-03 | -0.23 |
| ILMN_2365091 | FCAR      | 1.24E-03 | -0.45 |
| ILMN_2367215 | PRCP      | 1.25E-03 | -0.42 |
| ILMN_2115011 | FGD2      | 1.26E-03 | 0.35  |
| ILMN_2399769 | GPR177    | 1.26E-03 | -0.50 |
| ILMN_2225537 | PTGR1     | 1.26E-03 | -0.51 |
| ILMN_1746819 | C5        | 1.26E-03 | -0.35 |
| ILMN_1696485 | HNRNPAB   | 1.26E-03 | 0.35  |
| ILMN_2062620 | NMT2      | 1.27E-03 | -0.16 |
| ILMN_1750003 | CD200R1   | 1.27E-03 | 0.95  |
| ILMN_1756920 | ADAM15    | 1.27E-03 | 0.48  |
| ILMN_1709590 | PGM5      | 1.28E-03 | -0.39 |
| ILMN_1746578 | SLC23A2   | 1.28E-03 | -0.47 |
| ILMN_3304022 | LOC729102 | 1.28E-03 | 0.51  |
| ILMN_2338452 | SERPINA1  | 1.29E-03 | -0.49 |
| ILMN_1671489 | PC        | 1.29E-03 | -0.43 |
| ILMN_1692168 | UBE2Z     | 1.29E-03 | 0.39  |

|              |           |          |       |
|--------------|-----------|----------|-------|
| ILMN_1658885 | DAGLB     | 1.29E-03 | -0.51 |
| ILMN_2106167 | RAP1GDS1  | 1.29E-03 | 0.30  |
| ILMN_2383611 | PTPRE     | 1.29E-03 | 0.61  |
| ILMN_1670305 | SERPING1  | 1.29E-03 | -0.44 |
| ILMN_1727466 | KCNMB4    | 1.30E-03 | -0.34 |
| ILMN_1695851 | PARVG     | 1.30E-03 | -0.45 |
| ILMN_2392274 | CD82      | 1.31E-03 | -0.54 |
| ILMN_3239060 | KRBA1     | 1.31E-03 | -0.38 |
| ILMN_1655645 | AK2       | 1.31E-03 | 0.42  |
| ILMN_1680738 | C5orf13   | 1.31E-03 | -0.33 |
| ILMN_1732296 | ID3       | 1.31E-03 | -0.77 |
| ILMN_2173835 | FTHL3     | 1.32E-03 | -0.46 |
| ILMN_1800461 | CSNK2B    | 1.33E-03 | 0.49  |
| ILMN_1783598 | CAB39L    | 1.33E-03 | -0.42 |
| ILMN_1743299 | PXMP3     | 1.33E-03 | -0.37 |
| ILMN_2137789 | KLF4      | 1.33E-03 | 0.53  |
| ILMN_1698218 | TRAF1     | 1.33E-03 | 0.99  |
| ILMN_1770505 | BIK       | 1.34E-03 | 0.15  |
| ILMN_1713450 | MYL6B     | 1.34E-03 | -0.40 |
| ILMN_1747020 | SGK3      | 1.34E-03 | -0.37 |
| ILMN_1707434 | LOC653778 | 1.34E-03 | -0.35 |
| ILMN_1651262 | HNRNPAB   | 1.35E-03 | 0.43  |
| ILMN_1744381 | SERPINE1  | 1.36E-03 | 0.50  |
| ILMN_1803423 | ARHGEF6   | 1.38E-03 | -0.42 |
| ILMN_1707748 | PIM3      | 1.38E-03 | 0.51  |
| ILMN_1762529 | SLC12A8   | 1.38E-03 | -0.31 |
| ILMN_1808405 | HLA-DQA1  | 1.39E-03 | 0.92  |
| ILMN_1702609 | B3GNT5    | 1.40E-03 | 0.19  |
| ILMN_1798957 | C12orf47  | 1.40E-03 | -0.42 |
| ILMN_1657234 | CCL20     | 1.40E-03 | -0.24 |
| ILMN_1711608 | SSBP2     | 1.40E-03 | 0.41  |
| ILMN_1673991 | ATIC      | 1.41E-03 | 0.46  |
| ILMN_1656837 | RBP1      | 1.42E-03 | -0.42 |
| ILMN_1805800 | RAB5A     | 1.42E-03 | 0.43  |
| ILMN_2297864 | MTMR14    | 1.43E-03 | 0.30  |
| ILMN_2156936 | SCCPDH    | 1.43E-03 | -0.26 |
| ILMN_2307598 | SLC37A3   | 1.43E-03 | 0.36  |
| ILMN_1701413 | PIGQ      | 1.43E-03 | -0.34 |
| ILMN_1853167 |           | 1.43E-03 | -0.35 |
| ILMN_1774596 | BSCL2     | 1.44E-03 | -0.44 |
| ILMN_3245688 | DGCR6L    | 1.44E-03 | -0.40 |
| ILMN_1753342 | SAT1      | 1.44E-03 | -0.41 |
| ILMN_1755138 | NEK8      | 1.44E-03 | -0.28 |
| ILMN_1757287 | MAPK6     | 1.45E-03 | 0.38  |
| ILMN_2342638 | ASGR2     | 1.45E-03 | 0.34  |
| ILMN_1716276 | CCL4L2    | 1.47E-03 | 1.66  |

|              |            |          |       |
|--------------|------------|----------|-------|
| ILMN_1661537 | LEPROT     | 1.47E-03 | -0.45 |
| ILMN_1815895 | LOC649143  | 1.47E-03 | 0.69  |
| ILMN_1687508 | ALDH7A1    | 1.47E-03 | -0.37 |
| ILMN_1735014 | KLF6       | 1.48E-03 | 0.42  |
| ILMN_2038776 | TXN        | 1.48E-03 | 0.46  |
| ILMN_1729237 | CYB5R1     | 1.50E-03 | -0.39 |
| ILMN_1727348 | NMD3       | 1.51E-03 | 0.52  |
| ILMN_2379718 | RAB24      | 1.51E-03 | -0.35 |
| ILMN_1811592 | ARHGAP21   | 1.51E-03 | -0.45 |
| ILMN_2045419 | BNIP3L     | 1.51E-03 | -0.35 |
| ILMN_1668312 | SLC2A9     | 1.51E-03 | -0.40 |
| ILMN_2189993 | MRPS35     | 1.52E-03 | 0.38  |
| ILMN_2056479 | TXNL2      | 1.52E-03 | 0.49  |
| ILMN_3232156 | C7orf58    | 1.54E-03 | -0.15 |
| ILMN_3231621 | LOC730235  | 1.54E-03 | -0.29 |
| ILMN_2165867 | DHCR7      | 1.54E-03 | -0.31 |
| ILMN_2308338 | BMF        | 1.54E-03 | -0.28 |
| ILMN_1748538 | ALDH1A2    | 1.54E-03 | 2.14  |
| ILMN_1658706 | ST6GALNAC2 | 1.56E-03 | -0.35 |
| ILMN_1651819 | GALNT11    | 1.56E-03 | -0.34 |
| ILMN_1727309 | FAM82A2    | 1.56E-03 | -0.41 |
| ILMN_1742962 | CLEC6A     | 1.57E-03 | -0.21 |
| ILMN_1796409 | C1QB       | 1.58E-03 | 0.50  |
| ILMN_1773125 | ENTPD1     | 1.58E-03 | -0.39 |
| ILMN_1699226 | UBR4       | 1.59E-03 | 0.46  |
| ILMN_1705066 | BTBD11     | 1.59E-03 | -0.25 |
| ILMN_1767068 | SMAD6      | 1.61E-03 | 0.40  |
| ILMN_3202568 | LOC643768  | 1.62E-03 | -0.19 |
| ILMN_1751904 | EDNRB      | 1.62E-03 | -0.21 |
| ILMN_1674983 | LOC387841  | 1.63E-03 | -0.42 |
| ILMN_1672759 | CCDC109A   | 1.63E-03 | -0.35 |
| ILMN_1803850 | TSPAN15    | 1.63E-03 | 0.22  |
| ILMN_1700024 | UST        | 1.63E-03 | 0.29  |
| ILMN_1803745 | SUOX       | 1.64E-03 | 0.45  |
| ILMN_1746968 | PHF1       | 1.67E-03 | -0.26 |
| ILMN_1677511 | PTGS2      | 1.67E-03 | -0.30 |
| ILMN_1741133 | NME1       | 1.68E-03 | 0.69  |
| ILMN_2359287 | ITGA6      | 1.68E-03 | -0.26 |
| ILMN_1747673 | RASL10A    | 1.69E-03 | 0.35  |
| ILMN_1753719 | GTF2A2     | 1.69E-03 | 0.41  |
| ILMN_2402600 | GLIS3      | 1.70E-03 | -0.26 |
| ILMN_1664330 | CEACAM1    | 1.71E-03 | -0.14 |
| ILMN_1713892 | C4orf34    | 1.73E-03 | -0.41 |
| ILMN_1656910 | TRIM6      | 1.75E-03 | -0.37 |
| ILMN_1743199 | EGR2       | 1.75E-03 | 1.03  |
| ILMN_1660199 | ACAA2      | 1.75E-03 | 0.38  |

|              |           |          |       |
|--------------|-----------|----------|-------|
| ILMN_2175601 | VDAC1     | 1.75E-03 | 0.44  |
| ILMN_1782881 | DLEU7     | 1.76E-03 | -0.20 |
| ILMN_1659075 | HLA-DOA   | 1.76E-03 | 0.31  |
| ILMN_1715718 | ZNF784    | 1.77E-03 | -0.30 |
| ILMN_1780601 | EMR1      | 1.77E-03 | -0.32 |
| ILMN_2348268 | IFFO1     | 1.77E-03 | -0.43 |
| ILMN_1665738 | FLI1      | 1.77E-03 | -0.47 |
| ILMN_1699676 | C14orf147 | 1.77E-03 | -0.33 |
| ILMN_1732452 | MAPKAPK3  | 1.77E-03 | 0.44  |
| ILMN_1706886 | BCL7A     | 1.77E-03 | 0.26  |
| ILMN_1772824 | WNT5B     | 1.77E-03 | 0.62  |
| ILMN_1808979 | CLEC4D    | 1.78E-03 | -0.37 |
| ILMN_1797031 | HSPBAP1   | 1.78E-03 | -0.36 |
| ILMN_3239937 | NUDT16P   | 1.78E-03 | 0.29  |
| ILMN_1696956 | ARID3B    | 1.78E-03 | -0.29 |
| ILMN_2083469 | IRS2      | 1.79E-03 | -0.38 |
| ILMN_1735367 | HSD17B11  | 1.80E-03 | -0.44 |
| ILMN_1724907 | NUDT3     | 1.80E-03 | -0.35 |
| ILMN_2141482 | SERPINF1  | 1.80E-03 | -0.22 |
| ILMN_2053103 | SLC40A1   | 1.80E-03 | -0.44 |
| ILMN_1659682 | GALK2     | 1.82E-03 | 0.30  |
| ILMN_2074748 | HAL       | 1.82E-03 | -0.15 |
| ILMN_1784985 | PRRT3     | 1.86E-03 | 0.34  |
| ILMN_1760667 | POLR3GL   | 1.86E-03 | -0.40 |
| ILMN_1703538 | AIF1      | 1.86E-03 | -0.51 |
| ILMN_1752199 | LHPP      | 1.86E-03 | -0.46 |
| ILMN_2198185 | CXorf12   | 1.87E-03 | -0.34 |
| ILMN_1693804 | LOC652675 | 1.87E-03 | 0.30  |
| ILMN_2051867 | PTCD2     | 1.87E-03 | 0.27  |
| ILMN_1739576 | CYB5R2    | 1.88E-03 | -0.36 |
| ILMN_1656254 | NOTCH2NL  | 1.88E-03 | -0.42 |
| ILMN_1707720 | SLC1A5    | 1.88E-03 | 0.36  |
| ILMN_1769566 | ATG3      | 1.88E-03 | 0.37  |
| ILMN_2124221 | CLLU1OS   | 1.88E-03 | -0.61 |
| ILMN_1667319 | LPPR2     | 1.88E-03 | -0.23 |
| ILMN_1745904 | CCDC6     | 1.89E-03 | 0.64  |
| ILMN_1711838 | SLC25A24  | 1.89E-03 | -0.57 |
| ILMN_2093343 | PLAC8     | 1.89E-03 | -1.31 |
| ILMN_1681703 | FOXO3     | 1.91E-03 | -0.52 |
| ILMN_1806165 | HSPA6     | 1.92E-03 | -0.68 |
| ILMN_3251132 | TMOD2     | 1.92E-03 | -0.19 |
| ILMN_1750373 | KAL1      | 1.93E-03 | -0.27 |
| ILMN_1760849 | NETO2     | 1.93E-03 | 0.27  |
| ILMN_1681283 | HIF1A     | 1.95E-03 | -0.46 |
| ILMN_1679837 | SGPP1     | 1.96E-03 | 0.21  |
| ILMN_1652082 | ELF4      | 1.96E-03 | 0.48  |

|              |           |          |       |
|--------------|-----------|----------|-------|
| ILMN_2408112 | CD200R1   | 1.96E-03 | 1.04  |
| ILMN_1803561 | PLA2G4A   | 1.98E-03 | 0.22  |
| ILMN_1807206 | DHRS1     | 1.98E-03 | -0.42 |
| ILMN_1763467 | LY6G5C    | 1.98E-03 | -0.14 |
| ILMN_1777915 | STX6      | 1.99E-03 | -0.40 |
| ILMN_1711223 | LOC649362 | 2.01E-03 | -0.57 |
| ILMN_1750722 | RPS7      | 2.01E-03 | 0.31  |
| ILMN_1653871 | NAMPT     | 2.02E-03 | -0.40 |
| ILMN_1740572 | TCN2      | 2.02E-03 | -0.33 |
| ILMN_2101375 | CCDC77    | 2.03E-03 | -0.36 |
| ILMN_3200921 | LOC642590 | 2.04E-03 | -0.39 |
| ILMN_1678494 | ZNF438    | 2.07E-03 | -0.38 |
| ILMN_1753312 | PLXDC2    | 2.08E-03 | -0.45 |
| ILMN_1780898 | PRKCH     | 2.08E-03 | -0.48 |
| ILMN_1761463 | EFHD2     | 2.10E-03 | 0.43  |
| ILMN_2201580 | GSTM2     | 2.10E-03 | -0.40 |
| ILMN_3305993 | LOC728602 | 2.11E-03 | -0.32 |
| ILMN_1791792 | C12orf5   | 2.13E-03 | 0.40  |
| ILMN_1685661 | RRP15     | 2.13E-03 | 0.30  |
| ILMN_1654685 | MCTP1     | 2.13E-03 | -0.32 |
| ILMN_3228688 | LOC730415 | 2.14E-03 | 0.51  |
| ILMN_1792689 | HIST1H2AC | 2.15E-03 | -0.54 |
| ILMN_3248786 | LOC647588 | 2.15E-03 | -0.33 |
| ILMN_1713759 | UBE2J1    | 2.15E-03 | 0.45  |
| ILMN_1793959 | ADPGK     | 2.17E-03 | 0.38  |
| ILMN_1782110 | ZNF295    | 2.17E-03 | 0.32  |
| ILMN_1773427 | KANK1     | 2.17E-03 | -0.25 |
| ILMN_1765876 | ARHGAP24  | 2.17E-03 | -0.15 |
| ILMN_1767360 | IL10RB    | 2.17E-03 | -0.42 |
| ILMN_1800838 | SPATA12   | 2.18E-03 | -0.15 |
| ILMN_1794017 | SERTAD1   | 2.18E-03 | 0.39  |
| ILMN_1669094 | ZNF672    | 2.19E-03 | 0.32  |
| ILMN_1745499 | UXT       | 2.19E-03 | 0.19  |
| ILMN_1701882 | LOC653820 | 2.20E-03 | 0.23  |
| ILMN_1670672 | TMEM37    | 2.20E-03 | -0.34 |
| ILMN_1758806 | C21orf2   | 2.20E-03 | -0.28 |
| ILMN_1752226 | P2RY11    | 2.20E-03 | 0.68  |
| ILMN_1739942 | FAM117B   | 2.22E-03 | -0.27 |
| ILMN_1700380 | ATP6V0A2  | 2.22E-03 | 0.40  |
| ILMN_1691611 | LOC645436 | 2.22E-03 | 0.47  |
| ILMN_1807894 | SLC7A8    | 2.23E-03 | 0.66  |
| ILMN_1690352 | ADO       | 2.23E-03 | 0.50  |
| ILMN_1734543 | PTPRE     | 2.23E-03 | 0.61  |
| ILMN_1773553 | FLJ46906  | 2.24E-03 | 0.36  |
| ILMN_2381138 | SEH1L     | 2.27E-03 | 0.29  |
| ILMN_2365595 | GMPR2     | 2.29E-03 | -0.36 |

|              |           |          |       |
|--------------|-----------|----------|-------|
| ILMN_1653180 | TPM4      | 2.30E-03 | 0.39  |
| ILMN_1804174 | FCGR2B    | 2.30E-03 | 0.39  |
| ILMN_1740170 | CHCHD10   | 2.34E-03 | 0.41  |
| ILMN_3204890 | LOC345041 | 2.35E-03 | 0.18  |
| ILMN_1741356 | PRICKLE1  | 2.35E-03 | -0.20 |
| ILMN_1774604 | PNKD      | 2.35E-03 | -0.47 |
| ILMN_1676385 | PAK2      | 2.36E-03 | 0.23  |
| ILMN_1730986 | MALT1     | 2.36E-03 | 0.32  |
| ILMN_1807016 | LHX2      | 2.36E-03 | 0.39  |
| ILMN_2352380 | TRPM2     | 2.37E-03 | -0.57 |
| ILMN_1723912 | IFI44L    | 2.38E-03 | -0.43 |
| ILMN_1704713 | CSNK1G1   | 2.39E-03 | 0.45  |
| ILMN_1849013 |           | 2.40E-03 | 0.47  |
| ILMN_1782305 | NR4A2     | 2.40E-03 | -0.30 |
| ILMN_1838863 |           | 2.41E-03 | 0.20  |
| ILMN_1735052 | ULK1      | 2.41E-03 | -0.42 |
| ILMN_1750748 | MGC102966 | 2.41E-03 | 0.40  |
| ILMN_1760858 | RAB8A     | 2.41E-03 | 0.46  |
| ILMN_1720235 | ADSSL1    | 2.41E-03 | -0.27 |
| ILMN_1792922 | SOD2      | 2.41E-03 | -0.37 |
| ILMN_2309926 | ZDHHC14   | 2.41E-03 | -0.29 |
| ILMN_1774800 | KTELC1    | 2.42E-03 | 0.36  |
| ILMN_1776788 | C5orf41   | 2.42E-03 | -0.40 |
| ILMN_2307740 | CD46      | 2.43E-03 | -0.38 |
| ILMN_1740864 | TREML2    | 2.44E-03 | 0.14  |
| ILMN_1683664 | LOC650369 | 2.45E-03 | 0.37  |
| ILMN_1782741 | CD300LB   | 2.45E-03 | 0.48  |
| ILMN_1659923 | GNAQ      | 2.46E-03 | 0.39  |
| ILMN_1758055 | YIF1B     | 2.46E-03 | 0.35  |
| ILMN_1691402 | LOC644162 | 2.49E-03 | 0.43  |
| ILMN_1702637 | BEX1      | 2.50E-03 | -0.31 |
| ILMN_1683859 | SLC7A1    | 2.50E-03 | 0.61  |
| ILMN_1741021 | CH25H     | 2.50E-03 | 0.64  |
| ILMN_1794190 | CCPG1     | 2.50E-03 | -0.40 |
| ILMN_2347068 | MKNK2     | 2.51E-03 | -0.38 |
| ILMN_1684585 | ACSL1     | 2.51E-03 | -0.48 |
| ILMN_2110252 | NPM3      | 2.51E-03 | 0.35  |
| ILMN_1676846 | ABCE1     | 2.54E-03 | 0.29  |
| ILMN_1878029 |           | 2.54E-03 | -0.28 |
| ILMN_1745112 | FAM102A   | 2.54E-03 | 0.17  |
| ILMN_1704055 | HSPC111   | 2.55E-03 | 0.32  |
| ILMN_3242271 | GAPT      | 2.57E-03 | -0.75 |
| ILMN_1660359 | LOC654126 | 2.57E-03 | 0.33  |
| ILMN_1738742 | PLAT      | 2.61E-03 | 0.21  |
| ILMN_1659099 | ROCK2     | 2.61E-03 | 0.26  |
| ILMN_1709571 | LOC654126 | 2.61E-03 | 0.24  |

|              |            |          |       |
|--------------|------------|----------|-------|
| ILMN_1699603 | MRPL12     | 2.61E-03 | 0.28  |
| ILMN_1703180 | ETV3       | 2.61E-03 | 0.46  |
| ILMN_3243714 | LOC642073  | 2.61E-03 | 0.34  |
| ILMN_1768480 | VGLL4      | 2.64E-03 | -0.37 |
| ILMN_2323172 | CSF3R      | 2.64E-03 | -0.17 |
| ILMN_1768534 | BHLHB2     | 2.64E-03 | 0.73  |
| ILMN_1729294 | RNF130     | 2.65E-03 | -0.38 |
| ILMN_1766405 | GOLM1      | 2.66E-03 | 0.26  |
| ILMN_2139100 | SHISA5     | 2.66E-03 | -0.47 |
| ILMN_1680955 | AURKA      | 2.68E-03 | 0.37  |
| ILMN_1691616 | LOC727935  | 2.68E-03 | -0.35 |
| ILMN_1798543 | STK17B     | 2.68E-03 | 0.39  |
| ILMN_2170813 | LAMP3      | 2.73E-03 | 0.52  |
| ILMN_1765641 | SEMA3A     | 2.73E-03 | -0.24 |
| ILMN_1806249 | IL1RN      | 2.74E-03 | 0.28  |
| ILMN_1780036 | WDR1       | 2.74E-03 | 0.36  |
| ILMN_1756501 | ST6GAL1    | 2.74E-03 | 0.57  |
| ILMN_2293758 | AKAP11     | 2.74E-03 | 0.45  |
| ILMN_1662129 | RCN2       | 2.75E-03 | -0.39 |
| ILMN_1726873 | TPCN2      | 2.77E-03 | 0.37  |
| ILMN_3220934 | NCRNA00152 | 2.78E-03 | 0.26  |
| ILMN_1760449 | TSPAN32    | 2.79E-03 | 0.13  |
| ILMN_1769694 | ACCN2      | 2.79E-03 | -0.35 |
| ILMN_1778237 | FN1        | 2.81E-03 | 0.12  |
| ILMN_1674285 | LOC401233  | 2.81E-03 | -0.35 |
| ILMN_1773760 | PAICS      | 2.81E-03 | 0.35  |
| ILMN_1710216 | AVEN       | 2.81E-03 | 0.24  |
| ILMN_1701248 | TREM2      | 2.83E-03 | 0.44  |
| ILMN_1662619 | TFPI       | 2.83E-03 | -0.55 |
| ILMN_1766487 | LRRC25     | 2.83E-03 | -0.30 |
| ILMN_1675191 | GAPT       | 2.87E-03 | -1.13 |
| ILMN_1798270 | C11orf75   | 2.87E-03 | -0.46 |
| ILMN_2343105 | LIPT1      | 2.88E-03 | -0.29 |
| ILMN_1789599 | NBL1       | 2.88E-03 | 0.28  |
| ILMN_1784005 | LOC644615  | 2.89E-03 | -0.56 |
| ILMN_1805658 | LTV1       | 2.90E-03 | 0.38  |
| ILMN_1656415 | CDKN2C     | 2.91E-03 | -0.17 |
| ILMN_1787567 | TSC22D1    | 2.91E-03 | -0.48 |
| ILMN_1691436 | BLVRA      | 2.92E-03 | 0.44  |
| ILMN_3238369 | JHDM1D     | 2.92E-03 | 0.34  |
| ILMN_2164978 | PDP2       | 2.95E-03 | 0.15  |
| ILMN_1683096 | ASB1       | 2.96E-03 | -0.31 |
| ILMN_1708934 | ADM        | 2.97E-03 | -0.70 |
| ILMN_2233366 | ASAP1      | 2.99E-03 | 0.36  |
| ILMN_1664978 | TJP2       | 2.99E-03 | 0.25  |
| ILMN_1687315 | RXRA       | 2.99E-03 | -0.48 |

|              |           |          |       |
|--------------|-----------|----------|-------|
| ILMN_1742230 | BAZ1A     | 3.00E-03 | 0.38  |
| ILMN_3224856 | LOC729660 | 3.00E-03 | -0.28 |
| ILMN_1661717 | TFDP1     | 3.00E-03 | -0.43 |
| ILMN_1689371 | GIMAP2    | 3.00E-03 | -0.34 |
| ILMN_1736042 | ME1       | 3.00E-03 | -0.42 |
| ILMN_1753913 | GPR177    | 3.01E-03 | -0.24 |
| ILMN_1808047 | PHC2      | 3.01E-03 | -0.28 |
| ILMN_1674402 | TMEM71    | 3.01E-03 | 0.54  |
| ILMN_3240389 | CPOX      | 3.01E-03 | -0.31 |
| ILMN_2107004 | GPR1      | 3.03E-03 | -0.27 |
| ILMN_1809931 | NDRG1     | 3.04E-03 | -0.45 |
| ILMN_1774779 | LOC647121 | 3.06E-03 | 0.21  |
| ILMN_1712082 | GCNT3     | 3.07E-03 | 0.16  |
| ILMN_1785732 | TNFAIP6   | 3.07E-03 | -0.56 |
| ILMN_1659895 | MSN       | 3.08E-03 | 0.41  |
| ILMN_3238274 | BTBD2     | 3.08E-03 | -0.45 |
| ILMN_1725312 | RASA1     | 3.08E-03 | -0.35 |
| ILMN_1657871 | RSAD2     | 3.08E-03 | -0.45 |
| ILMN_1688423 | FCER1A    | 3.11E-03 | 0.69  |
| ILMN_1705953 | LONRF1    | 3.12E-03 | 0.22  |
| ILMN_1676528 | BTN3A2    | 3.12E-03 | -0.38 |
| ILMN_1673711 | HSP90AB1  | 3.14E-03 | 0.53  |
| ILMN_1769633 | CTSO      | 3.14E-03 | -0.36 |
| ILMN_1688672 | SIGLECP3  | 3.14E-03 | 0.19  |
| ILMN_1654560 | TLR6      | 3.14E-03 | -0.39 |
| ILMN_1777895 | LRRRC37B  | 3.14E-03 | 0.62  |
| ILMN_2140990 | CAMK1     | 3.14E-03 | 0.54  |
| ILMN_1751120 | HIST1H4H  | 3.14E-03 | -0.40 |
| ILMN_1788783 | TRAM2     | 3.15E-03 | 0.30  |
| ILMN_1716019 | RHBDL3    | 3.15E-03 | 0.23  |
| ILMN_2187830 | CCNH      | 3.15E-03 | 0.41  |
| ILMN_1784287 | TGFBR3    | 3.15E-03 | 0.20  |
| ILMN_1652223 | WDR91     | 3.15E-03 | -0.35 |
| ILMN_1745116 | ABHD12    | 3.17E-03 | 0.43  |
| ILMN_1658962 | LCP2      | 3.17E-03 | -0.29 |
| ILMN_1789436 | C1orf218  | 3.20E-03 | 0.38  |
| ILMN_2394305 | PDGFB     | 3.21E-03 | 0.23  |
| ILMN_1796130 | LOC221710 | 3.22E-03 | 0.28  |
| ILMN_1704785 | C10orf125 | 3.23E-03 | 0.26  |
| ILMN_1657632 | ZMYM6     | 3.24E-03 | -0.35 |
| ILMN_3226181 | NUDT7     | 3.26E-03 | -0.42 |
| ILMN_1785405 | SLC17A9   | 3.26E-03 | 0.18  |
| ILMN_1651343 | ITGA11    | 3.26E-03 | 0.17  |
| ILMN_1694708 | LOC650737 | 3.27E-03 | -0.27 |
| ILMN_1712719 | MAP7      | 3.29E-03 | 0.32  |
| ILMN_2373062 | RHBDF2    | 3.29E-03 | -0.43 |



|              |           |          |       |
|--------------|-----------|----------|-------|
| ILMN_2327947 | SLC25A25  | 3.31E-03 | 0.21  |
| ILMN_2246328 | PTPN22    | 3.31E-03 | -0.35 |
| ILMN_1753472 | SUMF1     | 3.34E-03 | -0.38 |
| ILMN_1704385 | LOC347376 | 3.37E-03 | -0.36 |
| ILMN_1677239 | CCDC14    | 3.37E-03 | -0.32 |
| ILMN_2058251 | VIM       | 3.37E-03 | 0.37  |
| ILMN_2292187 | CHN2      | 3.38E-03 | 0.14  |
| ILMN_1743397 | PIGW      | 3.38E-03 | 0.29  |
| ILMN_2386008 | MPZL1     | 3.38E-03 | -0.30 |
| ILMN_2184064 | ARRDC4    | 3.39E-03 | 0.42  |
| ILMN_1752631 | CGGBP1    | 3.39E-03 | 0.39  |
| ILMN_1768973 | HIST2H2AC | 3.39E-03 | -0.47 |
| ILMN_1749838 | MZF1      | 3.40E-03 | -0.32 |
| ILMN_3253728 | C19orf64  | 3.41E-03 | 0.25  |
| ILMN_1663035 | SREBF1    | 3.41E-03 | 0.36  |
| ILMN_2352077 | KL        | 3.41E-03 | -0.40 |
| ILMN_1779828 | EDEM1     | 3.41E-03 | 0.33  |
| ILMN_1771695 | RCBTB2    | 3.44E-03 | -0.26 |
| ILMN_1720113 | PTPRO     | 3.44E-03 | 0.36  |
| ILMN_2043452 | FANCE     | 3.44E-03 | -1.14 |
| ILMN_2077905 | PTGFRN    | 3.44E-03 | 0.41  |
| ILMN_2392189 | CTDSPL    | 3.45E-03 | -0.43 |
| ILMN_1677843 | RAB24     | 3.47E-03 | -0.37 |
| ILMN_1695093 | SLC7A8    | 3.49E-03 | 0.14  |
| ILMN_1786722 | ZNF385A   | 3.49E-03 | -0.30 |
| ILMN_2384241 | TGFBR2    | 3.49E-03 | -0.40 |
| ILMN_2375599 | RNH1      | 3.49E-03 | 0.47  |
| ILMN_1695485 | C9orf109  | 3.49E-03 | -0.27 |
| ILMN_1754507 | IRF4      | 3.51E-03 | 0.37  |
| ILMN_1732985 | PHF20L1   | 3.52E-03 | 0.31  |
| ILMN_1772492 | MCART1    | 3.54E-03 | -0.50 |
| ILMN_2262044 | PARP10    | 3.55E-03 | -0.39 |
| ILMN_1756572 | COQ2      | 3.56E-03 | -0.37 |
| ILMN_2232430 | NMD3      | 3.56E-03 | 0.45  |
| ILMN_2412380 | TSC22D1   | 3.56E-03 | -0.33 |
| ILMN_2366391 | PRDX1     | 3.56E-03 | -0.39 |
| ILMN_1798256 | UPP1      | 3.56E-03 | 0.44  |
| ILMN_1690523 | LRRC20    | 3.57E-03 | -0.22 |
| ILMN_1774708 | ORMDL2    | 3.58E-03 | 0.21  |
| ILMN_3285959 | LOC645515 | 3.58E-03 | 0.28  |
| ILMN_1763347 | PIK3CB    | 3.58E-03 | -0.27 |
| ILMN_1810852 | LAMC1     | 3.59E-03 | -0.34 |
| ILMN_1671843 | PSRC1     | 3.59E-03 | -0.22 |
| ILMN_1743194 | EEA1      | 3.59E-03 | 0.23  |
| ILMN_1753980 | LOC731950 | 3.60E-03 | 0.32  |
| ILMN_1792473 | AIF1      | 3.60E-03 | -0.43 |

|              |              |          |       |
|--------------|--------------|----------|-------|
| ILMN_2224907 | C4orf34      | 3.60E-03 | -0.42 |
| ILMN_1689378 | CCRN4L       | 3.61E-03 | 0.50  |
| ILMN_1712914 | SEMA6B       | 3.61E-03 | -0.39 |
| ILMN_2330267 | ABCE1        | 3.62E-03 | 0.37  |
| ILMN_1676213 | SRPX2        | 3.62E-03 | -0.21 |
| ILMN_1763852 | ACACB        | 3.62E-03 | -0.34 |
| ILMN_2294762 | AMY1A        | 3.62E-03 | 0.51  |
| ILMN_1830462 | XYLT1        | 3.62E-03 | 0.37  |
| ILMN_3244963 | WDR42A       | 3.65E-03 | -0.30 |
| ILMN_3270853 | LOC100130298 | 3.65E-03 | -0.17 |
| ILMN_1758941 | REEP5        | 3.66E-03 | 0.38  |
| ILMN_1653026 | PLAC8        | 3.68E-03 | -1.17 |
| ILMN_2070072 | RPS7         | 3.68E-03 | 0.31  |
| ILMN_2316878 | PTPRO        | 3.69E-03 | 0.39  |
| ILMN_1800935 | ARV1         | 3.70E-03 | 0.39  |
| ILMN_2180352 | DIP2B        | 3.71E-03 | 0.36  |
| ILMN_2334042 | THYN1        | 3.71E-03 | -0.36 |
| ILMN_1724686 | CLDN1        | 3.71E-03 | 0.12  |
| ILMN_1737406 | KLF6         | 3.72E-03 | 0.39  |
| ILMN_1745686 | MFHAS1       | 3.72E-03 | 0.46  |
| ILMN_1659659 | MAGEH1       | 3.73E-03 | -0.27 |
| ILMN_3226012 | LOC728698    | 3.73E-03 | 0.45  |
| ILMN_1770245 | EPB41L5      | 3.74E-03 | -0.27 |
| ILMN_2366703 | SGK3         | 3.74E-03 | -0.33 |
| ILMN_1671891 | PID1         | 3.74E-03 | -0.48 |
| ILMN_1712708 | TRIM47       | 3.74E-03 | 0.35  |
| ILMN_1697629 | PLA2G4B      | 3.74E-03 | -0.46 |
| ILMN_2415170 | VPS8         | 3.75E-03 | -0.32 |
| ILMN_1726666 | GPX3         | 3.78E-03 | -0.57 |
| ILMN_1857335 |              | 3.78E-03 | -0.20 |
| ILMN_1691717 | RHBDF2       | 3.78E-03 | -0.40 |
| ILMN_2101526 | GGCT         | 3.80E-03 | 0.42  |
| ILMN_1802557 | HEBP1        | 3.81E-03 | -0.44 |
| ILMN_1813846 | P2RX4        | 3.82E-03 | -0.35 |
| ILMN_1678671 | KLHL24       | 3.82E-03 | -0.32 |
| ILMN_1724837 | ZC3HAV1      | 3.82E-03 | 0.28  |
| ILMN_1743301 | MSR1         | 3.82E-03 | -0.45 |
| ILMN_1671482 | GALM         | 3.82E-03 | 0.43  |
| ILMN_1673252 | AIMP2        | 3.83E-03 | 0.34  |
| ILMN_1675674 | UBE4B        | 3.83E-03 | -0.36 |
| ILMN_2231928 | MX2          | 3.85E-03 | -0.48 |
| ILMN_1690282 | CRADD        | 3.86E-03 | -0.36 |
| ILMN_1777061 | ZSWIM6       | 3.86E-03 | -0.40 |
| ILMN_2105033 | PLDN         | 3.87E-03 | 0.36  |
| ILMN_1786189 | MKI67IP      | 3.87E-03 | 0.38  |
| ILMN_1654516 | TMEM120A     | 3.87E-03 | -0.30 |

|              |              |          |       |
|--------------|--------------|----------|-------|
| ILMN_1799208 | CSGALNACT2   | 3.88E-03 | 0.30  |
| ILMN_2263718 | SPAG9        | 3.88E-03 | 0.39  |
| ILMN_1679476 | GART         | 3.88E-03 | 0.37  |
| ILMN_2409062 | ISCU         | 3.88E-03 | -0.36 |
| ILMN_1785005 | NCF4         | 3.89E-03 | -0.39 |
| ILMN_1716265 | PGM2L1       | 3.90E-03 | -0.18 |
| ILMN_1738866 | DEXI         | 3.94E-03 | -0.39 |
| ILMN_1681248 | TCHH         | 3.94E-03 | -0.19 |
| ILMN_1776157 | 42251        | 3.95E-03 | -0.25 |
| ILMN_1718712 | C20orf177    | 3.95E-03 | -0.35 |
| ILMN_1652797 | FAM174B      | 3.96E-03 | -0.25 |
| ILMN_1755732 | ARMC9        | 3.98E-03 | -0.23 |
| ILMN_1758963 | NADK         | 3.98E-03 | -0.34 |
| ILMN_2319077 | FAS          | 4.00E-03 | 0.29  |
| ILMN_1675844 | WDR1         | 4.00E-03 | 0.32  |
| ILMN_1679797 | ADARB1       | 4.00E-03 | -0.33 |
| ILMN_2160764 | HBP1         | 4.00E-03 | -0.35 |
| ILMN_2066348 | HERPUD2      | 4.00E-03 | 0.22  |
| ILMN_1728168 | C20orf45     | 4.01E-03 | 0.34  |
| ILMN_2145116 | TMEM173      | 4.03E-03 | -0.40 |
| ILMN_1735038 | 42066        | 4.04E-03 | 0.22  |
| ILMN_1788192 | ARMCX1       | 4.06E-03 | -0.34 |
| ILMN_1801040 | SPN          | 4.09E-03 | 0.40  |
| ILMN_1751425 | ERMP1        | 4.09E-03 | -0.36 |
| ILMN_2184184 | ANXA1        | 4.10E-03 | 0.44  |
| ILMN_1678268 | VPS8         | 4.13E-03 | -0.30 |
| ILMN_2069224 | PVALB        | 4.15E-03 | -0.70 |
| ILMN_1879326 |              | 4.15E-03 | 0.28  |
| ILMN_1683806 | MRC1L1       | 4.16E-03 | 0.26  |
| ILMN_1800276 | RCN1         | 4.16E-03 | 0.39  |
| ILMN_1710482 | APLP2        | 4.17E-03 | -0.45 |
| ILMN_1664756 | KPNA4        | 4.20E-03 | 0.41  |
| ILMN_1800626 | SESN1        | 4.21E-03 | -0.37 |
| ILMN_1724407 | TACC3        | 4.21E-03 | -0.32 |
| ILMN_1714170 | SPSB1        | 4.23E-03 | 0.32  |
| ILMN_2066066 | HLA-DRB6     | 4.25E-03 | 0.36  |
| ILMN_1796712 | S100A10      | 4.25E-03 | -0.31 |
| ILMN_1774077 | GBP2         | 4.27E-03 | -0.44 |
| ILMN_1660027 | FCGR2B       | 4.29E-03 | 0.73  |
| ILMN_3188124 | LOC100130511 | 4.29E-03 | 0.40  |
| ILMN_1865764 |              | 4.29E-03 | -0.46 |
| ILMN_1698533 | IDH3A        | 4.30E-03 | 0.37  |
| ILMN_2100357 | SMPDL3A      | 4.30E-03 | -0.32 |
| ILMN_1713813 | LOC400578    | 4.30E-03 | 0.38  |
| ILMN_1711408 | ANXA4        | 4.30E-03 | 0.34  |
| ILMN_3251207 | TMEM19       | 4.30E-03 | -0.29 |

|              |              |          |       |
|--------------|--------------|----------|-------|
| ILMN_2363668 | YIF1B        | 4.30E-03 | 0.35  |
| ILMN_1737426 | PCMTD1       | 4.30E-03 | -0.40 |
| ILMN_1737025 | PLCL2        | 4.30E-03 | -0.43 |
| ILMN_1713397 | NCCRP1       | 4.31E-03 | 0.88  |
| ILMN_2403247 | CMTM7        | 4.31E-03 | 0.36  |
| ILMN_1737918 | C1QA         | 4.31E-03 | -0.29 |
| ILMN_2188722 | GLS          | 4.32E-03 | 0.37  |
| ILMN_3285302 | LOC283143    | 4.33E-03 | -0.14 |
| ILMN_1692177 | TSC22D1      | 4.33E-03 | -0.44 |
| ILMN_1742853 | LOC652184    | 4.33E-03 | 0.37  |
| ILMN_2381296 | GSTZ1        | 4.33E-03 | -0.32 |
| ILMN_1737498 | MLKL         | 4.33E-03 | -0.23 |
| ILMN_1688780 | S100A4       | 4.33E-03 | -0.50 |
| ILMN_1783285 | CTPS         | 4.33E-03 | 0.26  |
| ILMN_1690921 | STAT2        | 4.33E-03 | -0.37 |
| ILMN_3307858 | STIM2        | 4.34E-03 | 0.25  |
| ILMN_2219246 | LOC162073    | 4.34E-03 | 0.16  |
| ILMN_2376723 | CDKN2B       | 4.34E-03 | -0.49 |
| ILMN_3239460 | OAZ2         | 4.34E-03 | -0.51 |
| ILMN_1717261 | HLA-DRB3     | 4.34E-03 | 0.41  |
| ILMN_1652906 | GBGT1        | 4.34E-03 | -0.33 |
| ILMN_2329914 | SPRY1        | 4.34E-03 | -0.41 |
| ILMN_1763129 | DCTPP1       | 4.35E-03 | 0.32  |
| ILMN_2340347 | PC           | 4.37E-03 | -0.28 |
| ILMN_1656920 | CRIP1        | 4.42E-03 | 0.45  |
| ILMN_1789011 | SYNGR2       | 4.42E-03 | 0.15  |
| ILMN_3234436 | LOC100132528 | 4.44E-03 | 0.38  |
| ILMN_3247533 | LOC100133840 | 4.44E-03 | 0.32  |
| ILMN_1681890 | DYNLT3       | 4.45E-03 | -0.38 |
| ILMN_3244434 | ARAP2        | 4.45E-03 | 0.34  |
| ILMN_1663751 | CYCSL1       | 4.45E-03 | 0.36  |
| ILMN_1806651 | PARP8        | 4.47E-03 | -0.31 |
| ILMN_1678087 | MAP3K4       | 4.48E-03 | 0.37  |
| ILMN_1655884 | ATP2A2       | 4.51E-03 | 0.34  |
| ILMN_1752932 | MPZL2        | 4.52E-03 | 0.61  |
| ILMN_1762713 | C19orf59     | 4.52E-03 | -0.30 |
| ILMN_1776105 | PSPH         | 4.52E-03 | 0.28  |
| ILMN_1773200 | CP110        | 4.52E-03 | -0.33 |
| ILMN_1716651 | RUNX2        | 4.52E-03 | 0.23  |
| ILMN_1812226 | ICAM1        | 4.52E-03 | 0.53  |
| ILMN_1812278 | LY9          | 4.52E-03 | 0.78  |
| ILMN_1728714 | SSSCA1       | 4.56E-03 | 0.16  |
| ILMN_1669321 | MATK         | 4.57E-03 | 0.38  |
| ILMN_2296036 | PTPN2        | 4.59E-03 | 0.26  |
| ILMN_1814305 | SAMD9        | 4.60E-03 | -0.37 |
| ILMN_1753111 | NAMPT        | 4.60E-03 | -0.37 |

|              |            |          |       |
|--------------|------------|----------|-------|
| ILMN_1768469 | TCN1       | 4.60E-03 | -0.10 |
| ILMN_3230508 | NCRNA00152 | 4.60E-03 | 0.15  |
| ILMN_1707695 | IFIT1      | 4.60E-03 | -0.35 |
| ILMN_2289593 | FXVD2      | 4.66E-03 | -0.28 |
| ILMN_1678629 | DOCK7      | 4.66E-03 | 0.36  |
| ILMN_2380566 | SIAH1      | 4.67E-03 | 0.54  |
| ILMN_2384544 | ADAM15     | 4.68E-03 | 0.29  |
| ILMN_1656016 | DHX9       | 4.69E-03 | 0.24  |
| ILMN_1710756 | ENO1       | 4.70E-03 | 0.36  |
| ILMN_1844692 | FOXO3      | 4.72E-03 | -0.36 |
| ILMN_1708534 | PAX8       | 4.73E-03 | -0.26 |
| ILMN_2157951 | STX6       | 4.75E-03 | -0.37 |
| ILMN_2124187 | TSC22D2    | 4.76E-03 | 0.42  |
| ILMN_3294318 | LOC644173  | 4.76E-03 | -0.22 |
| ILMN_1766261 | SLC2A12    | 4.78E-03 | -0.12 |
| ILMN_1692271 | CCM2       | 4.78E-03 | 0.18  |
| ILMN_2112357 | CD300LF    | 4.78E-03 | -0.39 |
| ILMN_1783771 | UBE2Z      | 4.78E-03 | 0.31  |
| ILMN_1723706 | GRAMD4     | 4.80E-03 | -0.38 |
| ILMN_1803925 | MTMR3      | 4.80E-03 | -0.21 |
| ILMN_1690586 | HNRPA1P4   | 4.81E-03 | 0.46  |
| ILMN_3242900 | HIST2H2AA4 | 4.81E-03 | -0.47 |
| ILMN_1673899 | FAM57A     | 4.81E-03 | 0.15  |
| ILMN_1808821 | COMMD9     | 4.81E-03 | -0.38 |
| ILMN_1695640 | PTPN22     | 4.85E-03 | -0.32 |
| ILMN_1695645 | CETN2      | 4.85E-03 | -0.32 |
| ILMN_2069128 | EPB41L2    | 4.90E-03 | 0.18  |
| ILMN_1772646 | LOC388681  | 4.90E-03 | -0.25 |
| ILMN_1803742 | CAPZA1     | 4.91E-03 | 0.35  |
| ILMN_1655117 | WDR19      | 4.91E-03 | -0.29 |
| ILMN_1684306 | S100A4     | 4.91E-03 | -0.55 |
| ILMN_2150095 | CES4       | 4.92E-03 | -0.36 |
| ILMN_1798172 | IPO4       | 4.96E-03 | 0.16  |
| ILMN_1719433 | CD1D       | 4.96E-03 | -0.31 |
| ILMN_1657483 | SEC23B     | 4.97E-03 | 0.41  |
| ILMN_1737644 | TMEM219    | 4.97E-03 | -0.30 |
| ILMN_1760011 | GTF2IRD2B  | 4.97E-03 | -0.24 |
| ILMN_1662306 | RABL3      | 4.97E-03 | 0.26  |
| ILMN_1776047 | LOC646197  | 4.97E-03 | 0.31  |
| ILMN_2379130 | IRAK1      | 4.98E-03 | -0.31 |
| ILMN_2298365 | PPP2R2B    | 4.98E-03 | 0.32  |
| ILMN_1777190 | CFD        | 5.01E-03 | -0.43 |
| ILMN_1720484 | CRTAP      | 5.02E-03 | -0.20 |
| ILMN_1703565 | GLTSCR2    | 5.03E-03 | -0.35 |
| ILMN_1744471 | ZNF654     | 5.03E-03 | 0.34  |
| ILMN_1796179 | HIST1H2BK  | 5.04E-03 | -0.31 |

|              |              |          |       |
|--------------|--------------|----------|-------|
| ILMN_1762260 | C3           | 5.05E-03 | -0.19 |
| ILMN_2335704 | NCF4         | 5.05E-03 | -0.31 |
| ILMN_1705144 | ULK1         | 5.06E-03 | -0.43 |
| ILMN_1712751 | HADHA        | 5.08E-03 | 0.29  |
| ILMN_1678490 | RILPL2       | 5.10E-03 | -0.38 |
| ILMN_2225144 | EIF4E3       | 5.10E-03 | -0.35 |
| ILMN_1674394 | C20orf3      | 5.11E-03 | -0.38 |
| ILMN_3235832 | LOC728835    | 5.15E-03 | 1.75  |
| ILMN_1677572 | FSD1CL       | 5.15E-03 | -0.19 |
| ILMN_3306730 | RBM47        | 5.16E-03 | 0.41  |
| ILMN_1715863 | MLKL         | 5.20E-03 | -0.21 |
| ILMN_1691156 | MT1A         | 5.20E-03 | -0.39 |
| ILMN_3182768 | LOC100130520 | 5.20E-03 | 0.45  |
| ILMN_1789364 | ZNF789       | 5.22E-03 | 0.20  |
| ILMN_1737705 | UHRF1BP1L    | 5.24E-03 | 0.26  |
| ILMN_1777139 | MAK16        | 5.24E-03 | 0.27  |
| ILMN_1782829 | GLTSCR1      | 5.24E-03 | 0.33  |
| ILMN_1745034 | SLC11A2      | 5.24E-03 | 0.74  |
| ILMN_1764396 | HDAC4        | 5.25E-03 | -0.26 |
| ILMN_3247462 | GLRX3        | 5.27E-03 | 0.47  |
| ILMN_1696601 | VAR5         | 5.27E-03 | 0.30  |
| ILMN_1668408 | AIFM1        | 5.30E-03 | 0.29  |
| ILMN_1810229 | ARID4A       | 5.31E-03 | 0.30  |
| ILMN_2378100 | FBXL5        | 5.31E-03 | -0.32 |
| ILMN_1672042 | DOLPP1       | 5.31E-03 | 0.22  |
| ILMN_2115752 | MEFV         | 5.31E-03 | -0.29 |
| ILMN_2234412 | TLE3         | 5.31E-03 | -0.17 |
| ILMN_1716596 | NSMAF        | 5.31E-03 | -0.31 |
| ILMN_2313821 | AIFM1        | 5.32E-03 | 0.42  |
| ILMN_1715013 | ERMAP        | 5.32E-03 | -0.30 |
| ILMN_2129015 | AFF1         | 5.33E-03 | 0.31  |
| ILMN_1719343 | WDR26        | 5.33E-03 | -0.33 |
| ILMN_1692199 | RNF103       | 5.34E-03 | -0.33 |
| ILMN_2374683 | PTPN13       | 5.36E-03 | 0.12  |
| ILMN_1698225 | MYO5A        | 5.36E-03 | -0.32 |
| ILMN_1767747 | HDAC2        | 5.36E-03 | 0.33  |
| ILMN_1715684 | LAMB3        | 5.40E-03 | -0.25 |
| ILMN_3308961 | MIR1974      | 5.40E-03 | -0.37 |
| ILMN_2138589 | MERTK        | 5.40E-03 | -0.47 |
| ILMN_2387090 | CGGBP1       | 5.40E-03 | 0.50  |
| ILMN_2381397 | HSPD1        | 5.40E-03 | 0.36  |
| ILMN_1673282 | LAMP2        | 5.41E-03 | -0.30 |
| ILMN_1661439 | FLOT1        | 5.42E-03 | -0.35 |
| ILMN_2214197 | TP53INP1     | 5.43E-03 | -0.28 |
| ILMN_2376416 | UBXN11       | 5.45E-03 | -0.27 |
| ILMN_3265343 | LOC100130633 | 5.47E-03 | -0.37 |

|              |            |          |       |
|--------------|------------|----------|-------|
| ILMN_1788384 | C9orf5     | 5.49E-03 | -0.29 |
| ILMN_1659047 | HIST2H2AA3 | 5.50E-03 | -0.48 |
| ILMN_1802082 | PRDM8      | 5.50E-03 | -0.17 |
| ILMN_1727098 | PPP1R16B   | 5.50E-03 | 0.30  |
| ILMN_2407389 | GPNMB      | 5.55E-03 | -0.40 |
| ILMN_2398235 | PIK3R1     | 5.59E-03 | 0.15  |
| ILMN_1656628 | WDR4       | 5.59E-03 | 0.31  |
| ILMN_3249477 | CHIT1      | 5.59E-03 | -0.72 |
| ILMN_2297765 | KCNMA1     | 5.62E-03 | -0.45 |
| ILMN_1726512 | ZSCAN2     | 5.62E-03 | -0.22 |
| ILMN_2164242 | UBE2F      | 5.63E-03 | 0.44  |
| ILMN_1739050 | PIPOX      | 5.63E-03 | -0.12 |
| ILMN_1790962 | RINL       | 5.63E-03 | -0.28 |
| ILMN_1691339 | CLEC1A     | 5.63E-03 | 0.19  |
| ILMN_1765994 | ZBP1       | 5.64E-03 | -0.42 |
| ILMN_1703123 | AXUD1      | 5.65E-03 | 0.45  |
| ILMN_3235964 | HSPA7      | 5.67E-03 | -0.46 |
| ILMN_2274180 | MKKS       | 5.68E-03 | 0.32  |
| ILMN_1687301 | VCAN       | 5.68E-03 | -0.74 |
| ILMN_3307926 | ADRBK1     | 5.72E-03 | -0.44 |
| ILMN_2322375 | MAFF       | 5.72E-03 | 0.41  |
| ILMN_1702933 | ADM2       | 5.73E-03 | 0.33  |
| ILMN_1662328 | CNNM3      | 5.74E-03 | -0.25 |
| ILMN_1660661 | TCP1       | 5.75E-03 | 0.28  |
| ILMN_1733270 | CD163      | 5.77E-03 | -0.31 |
| ILMN_1674811 | OASL       | 5.77E-03 | -0.41 |
| ILMN_3193306 | C14orf109  | 5.79E-03 | -0.34 |
| ILMN_1743104 | RBM4B      | 5.80E-03 | -0.28 |
| ILMN_1672295 | ZC3H12A    | 5.80E-03 | 0.22  |
| ILMN_1685415 | HBP1       | 5.80E-03 | -0.34 |
| ILMN_2181445 | BCL2L13    | 5.80E-03 | -0.34 |
| ILMN_1762666 | DHRS4      | 5.84E-03 | -0.34 |
| ILMN_1715715 | CEBPA      | 5.86E-03 | 0.45  |
| ILMN_1781952 | MGST1      | 5.89E-03 | -0.35 |
| ILMN_1766408 | CBFB       | 5.89E-03 | 0.30  |
| ILMN_2082314 | TOM1       | 5.93E-03 | -0.45 |
| ILMN_1764723 | SH3PXD2B   | 5.98E-03 | 0.30  |
| ILMN_2044085 | RQCD1      | 5.98E-03 | 0.29  |
| ILMN_1676984 | DDIT3      | 5.99E-03 | 0.47  |
| ILMN_1670145 | DFNA5      | 5.99E-03 | -0.39 |
| ILMN_1749372 | GGT5       | 6.01E-03 | 0.16  |
| ILMN_1712389 | CKLF       | 6.02E-03 | 0.42  |
| ILMN_1659017 | C11orf74   | 6.04E-03 | -0.34 |
| ILMN_1752923 | IFNAR1     | 6.04E-03 | -0.38 |
| ILMN_1741628 | ABL2       | 6.04E-03 | 0.19  |
| ILMN_2072178 | ECHDC3     | 6.07E-03 | 0.45  |

|              |              |          |       |
|--------------|--------------|----------|-------|
| ILMN_1701789 | IFIT3        | 6.07E-03 | -0.44 |
| ILMN_2047618 | KCNE1        | 6.09E-03 | 0.40  |
| ILMN_1766916 | RPAP3        | 6.10E-03 | 0.37  |
| ILMN_1691097 | HSP90AA1     | 6.12E-03 | 0.44  |
| ILMN_2406084 | ITGA11       | 6.19E-03 | 0.10  |
| ILMN_1758626 | IDS          | 6.19E-03 | -0.34 |
| ILMN_1680347 | ZNF317       | 6.20E-03 | 0.30  |
| ILMN_1688373 | LST1         | 6.23E-03 | -0.33 |
| ILMN_1897741 |              | 6.24E-03 | -0.34 |
| ILMN_1682572 | KIAA0528     | 6.24E-03 | -0.32 |
| ILMN_1675656 | PPFIBP2      | 6.24E-03 | 0.44  |
| ILMN_2243687 | LAMP2        | 6.24E-03 | -0.36 |
| ILMN_1704531 | PTGR1        | 6.27E-03 | -0.50 |
| ILMN_2197846 | HADHB        | 6.28E-03 | 0.43  |
| ILMN_3227994 | LOC729992    | 6.30E-03 | 0.30  |
| ILMN_2336133 | SULT1A4      | 6.34E-03 | -0.28 |
| ILMN_2151488 | RMI1         | 6.36E-03 | 0.29  |
| ILMN_1656574 | PCGF6        | 6.44E-03 | 0.28  |
| ILMN_1757106 | 42069        | 6.45E-03 | -0.34 |
| ILMN_1665291 | NUB1         | 6.45E-03 | 0.34  |
| ILMN_1679800 | BRIX1        | 6.45E-03 | 0.31  |
| ILMN_1661264 | SHMT2        | 6.47E-03 | 0.38  |
| ILMN_1813117 | ITGA9        | 6.48E-03 | 0.23  |
| ILMN_2129572 | F3           | 6.48E-03 | 0.45  |
| ILMN_1709772 | SNX5         | 6.48E-03 | 0.33  |
| ILMN_1695025 | CD2          | 6.54E-03 | -0.18 |
| ILMN_1782095 | C20orf55     | 6.54E-03 | -0.34 |
| ILMN_1662973 | CD82         | 6.56E-03 | -0.31 |
| ILMN_2167011 | ECHDC1       | 6.57E-03 | -0.33 |
| ILMN_1761941 | C4orf18      | 6.58E-03 | -0.37 |
| ILMN_1694589 | PAQR8        | 6.62E-03 | -0.34 |
| ILMN_1854833 |              | 6.62E-03 | -0.19 |
| ILMN_3193687 | LOC100129391 | 6.62E-03 | 0.21  |
| ILMN_1765044 | CUTC         | 6.62E-03 | 0.32  |
| ILMN_3210741 | LOC642956    | 6.62E-03 | 0.46  |
| ILMN_1701514 | TRAF3IP2     | 6.65E-03 | -0.49 |
| ILMN_1888558 |              | 6.68E-03 | -0.20 |
| ILMN_1667657 | TPP2         | 6.71E-03 | 0.20  |
| ILMN_3248551 | C2CD4B       | 6.71E-03 | 0.28  |
| ILMN_1715583 | BOP1         | 6.75E-03 | 0.28  |
| ILMN_3206827 | LOC100131737 | 6.75E-03 | 0.30  |
| ILMN_2381697 | P4HA2        | 6.76E-03 | 0.33  |
| ILMN_2092536 | HSPE1        | 6.76E-03 | 0.32  |
| ILMN_3181296 | LOC100130623 | 6.78E-03 | -0.16 |
| ILMN_1704398 | FZD9         | 6.78E-03 | -0.32 |
| ILMN_2398107 | ASNS         | 6.81E-03 | 0.34  |



|              |              |          |       |
|--------------|--------------|----------|-------|
| ILMN_1796417 | ASNS         | 6.81E-03 | 0.52  |
| ILMN_3278070 | LOC100131336 | 6.84E-03 | 0.34  |
| ILMN_2382403 | FCGR2B       | 6.87E-03 | 0.42  |
| ILMN_1789781 | PIM3         | 6.89E-03 | 0.13  |
| ILMN_1706015 | FAM43A       | 6.93E-03 | -0.21 |
| ILMN_1741506 | LOC149134    | 6.93E-03 | -0.17 |
| ILMN_1702858 | ADHFE1       | 6.96E-03 | -0.26 |
| ILMN_1656560 | PARM1        | 7.00E-03 | 0.58  |
| ILMN_1696407 | SFRS2        | 7.00E-03 | 0.38  |
| ILMN_2271894 | ZNF654       | 7.04E-03 | 0.27  |
| ILMN_1809477 | CARHSP1      | 7.05E-03 | -0.34 |
| ILMN_1793433 | RAB10        | 7.06E-03 | 0.32  |
| ILMN_1732071 | HIST2H2BE    | 7.07E-03 | -0.33 |
| ILMN_2142695 | RNF4         | 7.09E-03 | 0.30  |
| ILMN_1791905 | CCDC103      | 7.12E-03 | -0.27 |
| ILMN_1733259 | ADORA3       | 7.13E-03 | 0.42  |
| ILMN_1859207 |              | 7.14E-03 | 0.20  |
| ILMN_2387680 | VNN3         | 7.14E-03 | -0.16 |
| ILMN_1718206 | KIAA0100     | 7.14E-03 | 0.27  |
| ILMN_2279635 | EIF4G2       | 7.16E-03 | 0.33  |
| ILMN_2038777 | ACTB         | 7.17E-03 | 0.38  |
| ILMN_2117987 | TFDP1        | 7.24E-03 | -0.40 |
| ILMN_2316844 | RBPJ         | 7.25E-03 | 0.14  |
| ILMN_2379644 | CD74         | 7.25E-03 | 0.52  |
| ILMN_3183620 | LOC100128326 | 7.25E-03 | -0.29 |
| ILMN_1697567 | TPM3         | 7.27E-03 | 0.34  |
| ILMN_1737964 | HIATL1       | 7.35E-03 | 0.47  |
| ILMN_1761804 | ALDH9A1      | 7.35E-03 | 0.34  |
| ILMN_1739641 | MTMR3        | 7.38E-03 | -0.37 |
| ILMN_2062468 | IGFBP7       | 7.39E-03 | -0.26 |
| ILMN_1660232 | PEX5         | 7.40E-03 | -0.36 |
| ILMN_1689329 | SCD          | 7.42E-03 | -0.40 |
| ILMN_1736757 | GNPTAB       | 7.42E-03 | -0.37 |
| ILMN_1677432 | SRGAP1       | 7.43E-03 | 0.24  |
| ILMN_1670302 | HK3          | 7.45E-03 | -0.33 |
| ILMN_1660063 | POLE4        | 7.46E-03 | -0.36 |
| ILMN_1676014 | LOC728635    | 7.46E-03 | -0.37 |
| ILMN_2370882 | ACSL5        | 7.47E-03 | 0.28  |
| ILMN_2394777 | DTNA         | 7.50E-03 | 0.11  |
| ILMN_1769433 | IQGAP2       | 7.55E-03 | -0.35 |
| ILMN_2380588 | C6orf108     | 7.57E-03 | 0.31  |
| ILMN_1736982 | PHACTR1      | 7.60E-03 | -0.16 |
| ILMN_1707585 | SLC46A2      | 7.60E-03 | -0.26 |
| ILMN_2387636 | ITGB4BP      | 7.62E-03 | 0.32  |
| ILMN_1670576 | IRF5         | 7.65E-03 | 0.33  |
| ILMN_1813701 | RASAL2       | 7.65E-03 | 0.22  |

|              |              |          |       |
|--------------|--------------|----------|-------|
| ILMN_1713603 | PRKCB1       | 7.65E-03 | -0.21 |
| ILMN_1754839 | DHX15        | 7.65E-03 | 0.30  |
| ILMN_3302156 | LOC729534    | 7.67E-03 | 0.13  |
| ILMN_3231881 | LOC728026    | 7.70E-03 | 0.31  |
| ILMN_1789505 | ITPR1        | 7.70E-03 | -0.34 |
| ILMN_3236481 | LOC100129086 | 7.71E-03 | 0.35  |
| ILMN_2226304 | ANKRD50      | 7.72E-03 | -0.25 |
| ILMN_3240316 | TMSL3        | 7.74E-03 | -0.30 |
| ILMN_1737580 | PPPDE2       | 7.74E-03 | 0.38  |
| ILMN_1691127 | VTN          | 7.76E-03 | -0.27 |
| ILMN_1663092 | CITED2       | 7.76E-03 | 0.41  |
| ILMN_2253759 | IL18BP       | 7.78E-03 | 0.10  |
| ILMN_1720048 | CCL2         | 7.82E-03 | -0.68 |
| ILMN_1748476 | NOP58        | 7.82E-03 | 0.27  |
| ILMN_3247645 | LOC550643    | 7.82E-03 | -0.31 |
| ILMN_1793287 | LOC642755    | 7.83E-03 | -0.38 |
| ILMN_1724946 | SPINT1       | 7.86E-03 | 0.20  |
| ILMN_1710092 | ZBTB46       | 7.89E-03 | 0.28  |
| ILMN_1801845 | DNAL4        | 7.90E-03 | -0.28 |
| ILMN_1806106 | GNL3         | 7.90E-03 | 0.25  |
| ILMN_1654571 | FCHO1        | 7.94E-03 | 0.19  |
| ILMN_2413779 | SEZ6L2       | 7.95E-03 | -0.23 |
| ILMN_1688346 | ZNF800       | 7.96E-03 | 0.27  |
| ILMN_1671152 | LOC649801    | 7.96E-03 | 0.26  |
| ILMN_1798395 | PIGH         | 8.00E-03 | 0.32  |
| ILMN_1807298 | NR4A3        | 8.04E-03 | 0.14  |
| ILMN_1767349 | ABCB4        | 8.09E-03 | 0.28  |
| ILMN_1786972 | SARS         | 8.11E-03 | 0.33  |
| ILMN_1686920 | CCDC58       | 8.14E-03 | -0.31 |
| ILMN_1793615 | ME3          | 8.14E-03 | 0.18  |
| ILMN_1659599 | ADC          | 8.15E-03 | 0.11  |
| ILMN_1665865 | IGFBP4       | 8.16E-03 | -0.34 |
| ILMN_1710495 | PAPLN        | 8.16E-03 | -0.29 |
| ILMN_1814333 | SERPINI1     | 8.23E-03 | -0.26 |
| ILMN_1698725 | FRMD3        | 8.26E-03 | -0.21 |
| ILMN_1780397 | TRAF3IP3     | 8.26E-03 | -0.24 |
| ILMN_1714401 | SNX27        | 8.26E-03 | -0.41 |
| ILMN_1912083 |              | 8.27E-03 | 0.23  |
| ILMN_1695576 | MRPL24       | 8.27E-03 | 0.32  |
| ILMN_1741422 | FUT8         | 8.27E-03 | -0.24 |
| ILMN_1854383 |              | 8.27E-03 | -0.13 |
| ILMN_1889752 |              | 8.28E-03 | 0.22  |
| ILMN_1738558 | RGS20        | 8.29E-03 | -0.37 |
| ILMN_1770293 | KLF5         | 8.30E-03 | 0.20  |
| ILMN_1690802 | TRMT112      | 8.30E-03 | -0.35 |
| ILMN_1779353 | PUS7         | 8.35E-03 | 0.27  |

|              |           |          |       |
|--------------|-----------|----------|-------|
| ILMN_1651557 | KDELC2    | 8.35E-03 | 0.26  |
| ILMN_1786016 | CHD1L     | 8.35E-03 | 0.27  |
| ILMN_1719032 | LSM3      | 8.37E-03 | -0.41 |
| ILMN_1690646 | SATB1     | 8.37E-03 | 0.20  |
| ILMN_2366177 | IFT122    | 8.38E-03 | -0.20 |
| ILMN_3225471 | LOC728650 | 8.45E-03 | -0.36 |
| ILMN_1772131 | IL1R2     | 8.45E-03 | 0.37  |
| ILMN_1651964 | ABCC5     | 8.45E-03 | 0.28  |
| ILMN_1691760 | FAM45A    | 8.48E-03 | -0.33 |
| ILMN_1716815 | CEACAM1   | 8.49E-03 | -0.52 |
| ILMN_2042771 | PTTG1     | 8.53E-03 | -0.29 |
| ILMN_1708105 | EZH2      | 8.55E-03 | 0.18  |
| ILMN_1746917 | LOC729843 | 8.57E-03 | -0.30 |
| ILMN_1729453 | TSPAN9    | 8.62E-03 | -0.11 |
| ILMN_1740604 | RAB11FIP5 | 8.64E-03 | -0.22 |
| ILMN_1735347 | MCEE      | 8.64E-03 | -0.33 |
| ILMN_1670000 | DCAF6     | 8.65E-03 | -0.32 |
| ILMN_2206554 | SLC35F5   | 8.67E-03 | 0.29  |
| ILMN_3243928 | DDX60L    | 8.67E-03 | -0.26 |
| ILMN_3300663 | LOC728661 | 8.70E-03 | -0.39 |
| ILMN_1718718 | MKKS      | 8.74E-03 | 0.33  |
| ILMN_1663399 | TIMP4     | 8.76E-03 | 0.35  |
| ILMN_1728073 | DENND1A   | 8.76E-03 | 0.16  |
| ILMN_1770641 | KLHL3     | 8.76E-03 | -0.24 |
| ILMN_1789007 | APOC1     | 8.76E-03 | -0.44 |
| ILMN_1656293 | GOSR2     | 8.76E-03 | 0.27  |
| ILMN_1677963 | TMCC1     | 8.76E-03 | -0.16 |
| ILMN_1691539 | LAT       | 8.76E-03 | -0.34 |
| ILMN_1729180 | GATM      | 8.77E-03 | 0.19  |
| ILMN_1770338 | TM4SF1    | 8.78E-03 | -0.35 |
| ILMN_1701621 | SCO2      | 8.81E-03 | -0.32 |
| ILMN_1700081 | FST       | 8.82E-03 | 0.14  |
| ILMN_1795236 | SIGLEC9   | 8.84E-03 | 0.26  |
| ILMN_1660451 | STARD13   | 8.88E-03 | -0.29 |
| ILMN_3178258 | FABP5L2   | 8.88E-03 | 0.43  |
| ILMN_1683277 | KIAA0319L | 8.88E-03 | -0.27 |
| ILMN_1685625 | UCP2      | 8.88E-03 | 0.52  |
| ILMN_3289745 | LOC339352 | 8.88E-03 | -0.24 |
| ILMN_2375879 | VEGFA     | 8.91E-03 | 0.24  |
| ILMN_2347917 | EED       | 8.93E-03 | 0.31  |
| ILMN_1720623 | SYTL3     | 8.95E-03 | -0.36 |
| ILMN_1763260 | HIF1A     | 8.98E-03 | -0.50 |
| ILMN_3224926 | RBM47     | 9.03E-03 | 0.33  |
| ILMN_2152402 | BAT5      | 9.03E-03 | 0.30  |
| ILMN_1724902 | SLC22A18  | 9.03E-03 | -0.13 |
| ILMN_1795906 | PCBD1     | 9.03E-03 | 0.32  |

|              |           |          |       |
|--------------|-----------|----------|-------|
| ILMN_1761464 | CD74      | 9.07E-03 | 0.56  |
| ILMN_2369018 | EVI2A     | 9.08E-03 | -0.36 |
| ILMN_2365686 | ALG8      | 9.12E-03 | 0.30  |
| ILMN_3229859 | MOBK3     | 9.13E-03 | 0.25  |
| ILMN_1714393 | RAB24     | 9.13E-03 | -0.22 |
| ILMN_1799889 | ATP6V0D2  | 9.16E-03 | -0.48 |
| ILMN_1697817 | PANX1     | 9.16E-03 | -0.21 |
| ILMN_1677919 | GMPT2     | 9.19E-03 | -0.36 |
| ILMN_2351298 | WIPF1     | 9.22E-03 | -0.34 |
| ILMN_1728698 | GDE1      | 9.26E-03 | -0.27 |
| ILMN_1750130 | GSPT1     | 9.27E-03 | 0.32  |
| ILMN_1661266 | HLA-DQB1  | 9.28E-03 | 0.42  |
| ILMN_3306482 | LOC730107 | 9.28E-03 | 0.25  |
| ILMN_1680339 | PDGFRL    | 9.32E-03 | 0.34  |
| ILMN_1749078 | TIMP2     | 9.36E-03 | -0.35 |
| ILMN_1659257 | TNFRSF8   | 9.37E-03 | -0.21 |
| ILMN_1815626 | DHCR7     | 9.38E-03 | -0.23 |
| ILMN_1701006 | HEXIM2    | 9.38E-03 | -0.23 |
| ILMN_1673941 | RBM24     | 9.40E-03 | -0.13 |
| ILMN_1746309 | LOC389791 | 9.42E-03 | 0.10  |
| ILMN_1766713 | HSPD1     | 9.42E-03 | 0.38  |
| ILMN_2216815 | MAP7      | 9.43E-03 | 0.34  |
| ILMN_1677800 | SGTA      | 9.46E-03 | 0.16  |
| ILMN_1686373 | C15orf26  | 9.47E-03 | -0.12 |
| ILMN_1815345 | EIF3J     | 9.52E-03 | 0.30  |
| ILMN_1846922 |           | 9.53E-03 | -0.34 |
| ILMN_1736704 | DIXDC1    | 9.54E-03 | -0.23 |
| ILMN_2084073 | UCN       | 9.55E-03 | -0.24 |
| ILMN_2203891 | SMAD7     | 9.60E-03 | 0.27  |
| ILMN_1774447 | AMPD3     | 9.61E-03 | -0.21 |
| ILMN_1776967 | LRRC50    | 9.68E-03 | -0.21 |
| ILMN_3307782 | FBXL18    | 9.70E-03 | -0.31 |
| ILMN_1816244 |           | 9.71E-03 | 0.28  |
| ILMN_1706217 | TLR4      | 9.75E-03 | -0.29 |
| ILMN_1750093 | SDHALP1   | 9.76E-03 | -0.47 |
| ILMN_1901616 |           | 9.78E-03 | -0.29 |
| ILMN_2312606 | IRF5      | 9.79E-03 | 0.38  |
| ILMN_1765446 | EMP3      | 9.79E-03 | -0.35 |
| ILMN_1716876 | MED27     | 9.79E-03 | 0.22  |
| ILMN_1690289 | DUOX1     | 9.79E-03 | 0.22  |
| ILMN_2363634 | ADHFE1    | 9.79E-03 | -0.13 |
| ILMN_1801710 | APBB1IP   | 9.81E-03 | 0.36  |
| ILMN_3236160 | C4orf49   | 9.81E-03 | -0.12 |
| ILMN_1787186 | NOV       | 9.82E-03 | -0.19 |
| ILMN_1717710 | SLC26A5   | 9.82E-03 | 0.11  |
| ILMN_1675386 | CES1      | 9.86E-03 | -0.43 |

|              |           |          |       |
|--------------|-----------|----------|-------|
| ILMN_1665964 | GAB2      | 9.91E-03 | 0.38  |
| ILMN_3199755 | LOC646821 | 9.93E-03 | 0.26  |
| ILMN_2414533 | ARMCX6    | 9.94E-03 | -0.24 |
| ILMN_1773018 | CUEDC2    | 9.97E-03 | -0.31 |
| ILMN_1707710 | SLC6A13   | 9.97E-03 | -0.12 |

### Azithromycin (AZM)

| ProbeID      | Gene Symbol | FDR      | Log <sub>2</sub> [AZM/NoTx] |
|--------------|-------------|----------|-----------------------------|
| ILMN_1693009 | FGL2        | 4.27E-07 | -1.73                       |
| ILMN_1729801 | S100A8      | 4.27E-07 | -1.74                       |
| ILMN_1775501 | IL1B        | 2.39E-06 | -1.28                       |
| ILMN_2359800 | MS4A6A      | 2.46E-06 | -1.10                       |
| ILMN_2092118 | FPR1        | 2.46E-06 | -1.29                       |
| ILMN_1810560 | P8          | 5.14E-06 | 1.58                        |
| ILMN_2388800 | PPAP2B      | 5.81E-06 | 1.58                        |
| ILMN_1740015 | CD14        | 5.81E-06 | -1.15                       |
| ILMN_1721035 | MS4A6A      | 6.46E-06 | -1.08                       |
| ILMN_3243682 | C1orf93     | 8.24E-06 | 1.06                        |
| ILMN_1792473 | AIF1        | 8.24E-06 | -0.92                       |
| ILMN_1797731 | MS4A6A      | 8.24E-06 | -0.88                       |
| ILMN_1750974 | S100A9      | 8.24E-06 | -1.18                       |
| ILMN_1769876 | TBC1D2      | 8.24E-06 | 1.14                        |
| ILMN_1712475 | HS3ST2      | 8.24E-06 | 2.33                        |
| ILMN_1756928 | RTN1        | 8.24E-06 | -0.91                       |
| ILMN_1808919 | HPS4        | 1.06E-05 | 0.82                        |
| ILMN_1790689 | CRISPLD2    | 1.06E-05 | -1.02                       |
| ILMN_1726666 | GPX3        | 1.06E-05 | -1.19                       |
| ILMN_2408683 | PPAP2B      | 1.07E-05 | 1.38                        |
| ILMN_2235851 | LINCR       | 1.17E-05 | 1.29                        |
| ILMN_1729188 | HAMP        | 1.23E-05 | 1.88                        |
| ILMN_2407389 | GPNMB       | 1.63E-05 | 1.05                        |
| ILMN_1731644 | SETDB2      | 2.00E-05 | 1.12                        |
| ILMN_1819783 |             | 2.17E-05 | 0.92                        |
| ILMN_1689200 | DHDH        | 2.17E-05 | 1.04                        |
| ILMN_1787186 | NOV         | 2.17E-05 | 1.11                        |
| ILMN_1695316 | SLC39A8     | 2.30E-05 | -1.25                       |
| ILMN_2404688 | NUPR1       | 2.51E-05 | 1.71                        |
| ILMN_1691341 | IL7R        | 2.63E-05 | -0.87                       |
| ILMN_1739222 | ETV5        | 3.06E-05 | -0.98                       |
| ILMN_2205963 | C10orf54    | 3.06E-05 | -1.06                       |
| ILMN_1738992 | MNDA        | 3.77E-05 | -0.76                       |
| ILMN_1780465 | CLEC5A      | 3.77E-05 | -1.06                       |
| ILMN_1714433 | MARCKSL1    | 3.77E-05 | -1.00                       |
| ILMN_1703946 | ADORA2B     | 3.77E-05 | 1.10                        |

|              |          |          |       |
|--------------|----------|----------|-------|
| ILMN_1776678 | GIMAP7   | 3.77E-05 | -0.88 |
| ILMN_2046611 | MCOLN3   | 4.13E-05 | 0.66  |
| ILMN_1687824 | SEPHS2   | 4.99E-05 | 0.83  |
| ILMN_1655549 | SIGLEC10 | 5.30E-05 | -1.20 |
| ILMN_2396020 | DUSP6    | 5.36E-05 | -0.97 |
| ILMN_1789338 | SORBS3   | 5.69E-05 | 0.68  |
| ILMN_1740875 | FPR2     | 6.53E-05 | -0.97 |
| ILMN_2338963 | SLC29A1  | 6.65E-05 | 0.52  |
| ILMN_1670325 | SLC47A1  | 7.19E-05 | 0.73  |
| ILMN_1664761 | TMEM138  | 7.19E-05 | 0.98  |
| ILMN_1814998 | FKSG30   | 7.19E-05 | -1.12 |
| ILMN_1686623 | CSF1R    | 7.82E-05 | -0.87 |
| ILMN_1690101 | FAIM     | 8.83E-05 | 0.81  |
| ILMN_2255133 | BCL11A   | 8.83E-05 | 0.68  |
| ILMN_1746888 | PCOLCE2  | 8.83E-05 | -0.82 |
| ILMN_1806165 | HSPA6    | 9.00E-05 | -0.79 |
| ILMN_1731928 | LY9      | 9.15E-05 | 0.44  |
| ILMN_1669940 | TMEM38B  | 9.15E-05 | 0.88  |
| ILMN_1669523 | FOS      | 9.60E-05 | -0.77 |
| ILMN_2345353 | LST1     | 1.01E-04 | -0.72 |
| ILMN_2232121 | GPR65    | 1.01E-04 | -0.69 |
| ILMN_1747347 | C17orf60 | 1.09E-04 | -1.01 |
| ILMN_1804735 | CBS      | 1.09E-04 | 0.79  |
| ILMN_1789361 | PKD2L1   | 1.09E-04 | 0.68  |
| ILMN_1737484 | RTN4R    | 1.09E-04 | 0.89  |
| ILMN_2154053 | FVT1     | 1.09E-04 | 0.61  |
| ILMN_1651769 | ZFYVE16  | 1.09E-04 | 0.60  |
| ILMN_1677814 | ABCC3    | 1.26E-04 | -0.65 |
| ILMN_1713505 | NPC1     | 1.31E-04 | 0.95  |
| ILMN_1702231 | C1orf54  | 1.32E-04 | -0.84 |
| ILMN_1713749 | CORO1A   | 1.37E-04 | -0.97 |
| ILMN_2382657 | ARHGAP9  | 1.43E-04 | -0.52 |
| ILMN_3307158 | ATG4A    | 1.43E-04 | 0.63  |
| ILMN_1759792 | CLIP4    | 1.50E-04 | 0.73  |
| ILMN_2404512 | PSEN2    | 1.51E-04 | 0.56  |
| ILMN_1723971 | SLC29A1  | 1.51E-04 | 0.64  |
| ILMN_1739751 | SLC26A11 | 1.51E-04 | 1.20  |
| ILMN_1782729 | CLECL1   | 1.51E-04 | -0.53 |
| ILMN_1713829 | PTGES    | 1.51E-04 | 0.75  |
| ILMN_1672608 | PPAP2B   | 1.54E-04 | 0.40  |
| ILMN_1734740 | GPR65    | 1.54E-04 | -0.79 |
| ILMN_1703538 | AIF1     | 1.54E-04 | -0.85 |
| ILMN_1801205 | GPNMB    | 1.54E-04 | 0.76  |
| ILMN_1742981 | TUBA1A   | 1.54E-04 | -0.66 |
| ILMN_1705403 | CYP2S1   | 1.54E-04 | -0.68 |
| ILMN_3241758 | POTEF    | 1.60E-04 | -0.99 |

|              |           |          |       |
|--------------|-----------|----------|-------|
| ILMN_1779015 | ZNF467    | 1.60E-04 | -0.73 |
| ILMN_1663313 | AMY1C     | 1.60E-04 | -0.91 |
| ILMN_1670302 | HK3       | 1.60E-04 | -0.57 |
| ILMN_1803988 | MCL1      | 1.66E-04 | -0.60 |
| ILMN_1784871 | FASN      | 1.68E-04 | 0.69  |
| ILMN_1677466 | DUSP6     | 1.68E-04 | -0.49 |
| ILMN_1764030 | CCL23     | 1.68E-04 | -0.61 |
| ILMN_2310896 | NLRP3     | 1.71E-04 | -0.62 |
| ILMN_2399363 | CLEC4A    | 1.72E-04 | -0.67 |
| ILMN_1656194 | TSPAN10   | 1.72E-04 | 0.70  |
| ILMN_1810628 | KIAA0367  | 1.74E-04 | -0.72 |
| ILMN_1803560 | LAT2      | 1.82E-04 | -0.69 |
| ILMN_2101278 | RGS18     | 1.89E-04 | -0.62 |
| ILMN_1704961 | ACTG1     | 1.89E-04 | -0.83 |
| ILMN_1758895 | CTSK      | 1.92E-04 | 0.86  |
| ILMN_1683755 | SOX13     | 1.95E-04 | 0.56  |
| ILMN_1769013 | ASGR1     | 1.95E-04 | -0.63 |
| ILMN_1695246 | KLHDC8B   | 1.95E-04 | 0.90  |
| ILMN_2038777 | ACTB      | 1.95E-04 | -0.87 |
| ILMN_1730504 | AGPAT4    | 1.95E-04 | 0.47  |
| ILMN_2070375 | GPR82     | 1.95E-04 | -1.12 |
| ILMN_1769229 | BCL2A1    | 1.95E-04 | 0.55  |
| ILMN_1758939 | RIPK2     | 1.98E-04 | 0.73  |
| ILMN_2351548 | FAIM      | 2.08E-04 | 0.55  |
| ILMN_1679782 | BLOC1S2   | 2.08E-04 | 0.55  |
| ILMN_2339748 | RNF13     | 2.10E-04 | 0.73  |
| ILMN_3269775 | C14orf109 | 2.19E-04 | 1.03  |
| ILMN_2359945 | CES1      | 2.19E-04 | 0.71  |
| ILMN_2264011 | GRAP      | 2.19E-04 | -0.45 |
| ILMN_1723035 | OLR1      | 2.19E-04 | -0.86 |
| ILMN_2183409 | SCARB1    | 2.19E-04 | 0.58  |
| ILMN_2289849 | FCGR2A    | 2.19E-04 | -0.54 |
| ILMN_2129505 | CYBASC3   | 2.19E-04 | 0.86  |
| ILMN_1697409 | TNFRSF14  | 2.19E-04 | 0.72  |
| ILMN_1802557 | HEBP1     | 2.19E-04 | 0.66  |
| ILMN_1654560 | TLR6      | 2.23E-04 | -0.64 |
| ILMN_1737918 | C1QA      | 2.25E-04 | -0.59 |
| ILMN_1664828 | APOBEC3H  | 2.26E-04 | -0.44 |
| ILMN_1727284 | CD4       | 2.36E-04 | -0.47 |
| ILMN_1689001 | CDK4      | 2.36E-04 | 0.82  |
| ILMN_1757347 | C22orf9   | 2.36E-04 | 0.49  |
| ILMN_1900661 |           | 2.39E-04 | 0.78  |
| ILMN_1685824 | B4GALT5   | 2.41E-04 | 0.81  |
| ILMN_1772224 | KCNJ5     | 2.43E-04 | 0.51  |
| ILMN_1701947 | GPR34     | 2.62E-04 | -0.83 |
| ILMN_2152828 | KIF16B    | 2.66E-04 | 0.50  |

|              |              |          |       |
|--------------|--------------|----------|-------|
| ILMN_1736939 | UGCG         | 2.70E-04 | 0.90  |
| ILMN_1718936 | LST1         | 2.70E-04 | -0.67 |
| ILMN_1757845 | SPIRE1       | 2.72E-04 | 0.73  |
| ILMN_1783805 | PNMA3        | 2.72E-04 | 0.35  |
| ILMN_1745116 | ABHD12       | 2.72E-04 | 0.68  |
| ILMN_1654612 | ZNF589       | 2.72E-04 | 0.63  |
| ILMN_1784207 | C1orf128     | 2.73E-04 | 0.93  |
| ILMN_1781691 | TRAK2        | 2.77E-04 | 0.69  |
| ILMN_1665107 | ITGB1BP1     | 2.77E-04 | 0.42  |
| ILMN_1785902 | C1QC         | 2.77E-04 | -0.84 |
| ILMN_1736982 | PHACTR1      | 2.83E-04 | 0.67  |
| ILMN_2329429 | GIMAP6       | 2.84E-04 | -0.65 |
| ILMN_1798061 | ZFYVE26      | 2.84E-04 | 0.67  |
| ILMN_1717326 | SLC29A3      | 2.87E-04 | 0.54  |
| ILMN_1738578 | FILIP1L      | 2.88E-04 | -0.31 |
| ILMN_1759326 | P2RX7        | 2.89E-04 | 0.71  |
| ILMN_3248591 | LTBP2        | 2.89E-04 | -0.31 |
| ILMN_1692466 | LOC728637    | 2.93E-04 | -0.39 |
| ILMN_1754894 | C1orf162     | 2.93E-04 | -0.75 |
| ILMN_2154052 | FVT1         | 2.93E-04 | 0.51  |
| ILMN_1680996 | ALOX5        | 2.94E-04 | -0.70 |
| ILMN_1682316 | TRIM33       | 3.29E-04 | 0.63  |
| ILMN_2392569 | FPR2         | 3.29E-04 | -0.69 |
| ILMN_1795342 | MLPH         | 3.29E-04 | 1.15  |
| ILMN_1653618 | ZZZ3         | 3.37E-04 | 0.77  |
| ILMN_1803676 | ENOSF1       | 3.37E-04 | 0.79  |
| ILMN_1659544 | STX3         | 3.37E-04 | 0.57  |
| ILMN_1793201 | HAGHL        | 3.38E-04 | 0.31  |
| ILMN_1659027 | SLC2A1       | 3.38E-04 | 0.67  |
| ILMN_1701933 | SNCA         | 3.39E-04 | 0.64  |
| ILMN_1787815 | TRIB3        | 3.45E-04 | 0.97  |
| ILMN_1700690 | VAT1         | 3.45E-04 | 0.79  |
| ILMN_1787265 | ZNF503       | 3.45E-04 | -0.44 |
| ILMN_3240900 | LOC100134728 | 3.45E-04 | -0.49 |
| ILMN_3243705 | PDXDC1       | 3.45E-04 | 0.86  |
| ILMN_3193306 | C14orf109    | 3.45E-04 | 0.92  |
| ILMN_1711838 | SLC25A24     | 3.45E-04 | 0.49  |
| ILMN_2207562 | C4orf16      | 3.48E-04 | 0.27  |
| ILMN_1669409 | VSIG4        | 3.48E-04 | -0.83 |
| ILMN_1693650 | FES          | 3.56E-04 | -0.60 |
| ILMN_2052891 | PKD2         | 3.56E-04 | 0.52  |
| ILMN_1752755 | VWF          | 3.57E-04 | 0.46  |
| ILMN_1745811 | TDRD3        | 3.58E-04 | 0.65  |
| ILMN_2099277 | HTRA4        | 3.60E-04 | 1.30  |
| ILMN_1719433 | CD1D         | 3.65E-04 | -0.98 |
| ILMN_1670145 | DFNA5        | 3.65E-04 | 0.94  |



|              |              |          |       |
|--------------|--------------|----------|-------|
| ILMN_1665945 | ACBD3        | 3.65E-04 | 0.59  |
| ILMN_2121408 | HBEGF        | 3.66E-04 | -0.61 |
| ILMN_1711888 | COBL         | 3.66E-04 | 0.72  |
| ILMN_1790973 | CDS2         | 3.66E-04 | 0.53  |
| ILMN_1671516 | CIR1         | 3.66E-04 | 0.78  |
| ILMN_1865764 |              | 3.66E-04 | -0.61 |
| ILMN_2150196 | LRRC25       | 3.67E-04 | -0.49 |
| ILMN_2326953 | LAT2         | 3.67E-04 | -0.70 |
| ILMN_1701621 | SCO2         | 3.69E-04 | -0.58 |
| ILMN_1772218 | HLA-DPA1     | 3.76E-04 | -0.63 |
| ILMN_3250257 | ACVRL1       | 3.76E-04 | -0.57 |
| ILMN_1757210 | CALML4       | 3.76E-04 | -0.48 |
| ILMN_1772131 | IL1R2        | 3.76E-04 | -0.42 |
| ILMN_2351930 | TRIM33       | 3.76E-04 | 0.62  |
| ILMN_1731433 | ABP1         | 3.76E-04 | -0.38 |
| ILMN_2233539 | SLC39A8      | 4.01E-04 | -1.18 |
| ILMN_1702501 | RPS6KA2      | 4.07E-04 | 0.87  |
| ILMN_3249667 | LOC100133678 | 4.09E-04 | -0.66 |
| ILMN_1801443 | TSKU         | 4.09E-04 | 0.81  |
| ILMN_1748473 | GIMAP4       | 4.14E-04 | -0.61 |
| ILMN_1906187 |              | 4.16E-04 | 0.34  |
| ILMN_2092333 | GPR141       | 4.21E-04 | -0.44 |
| ILMN_1783956 | ATP8B4       | 4.23E-04 | -0.67 |
| ILMN_1769245 | GLIPR1       | 4.23E-04 | -0.61 |
| ILMN_1795963 | OKL38        | 4.24E-04 | 0.82  |
| ILMN_1695423 | CD9          | 4.25E-04 | 0.58  |
| ILMN_2312340 | LILRB2       | 4.25E-04 | -0.72 |
| ILMN_1689329 | SCD          | 4.26E-04 | 0.85  |
| ILMN_1752899 | BCL11A       | 4.32E-04 | 0.70  |
| ILMN_1704753 | EPAS1        | 4.32E-04 | 0.56  |
| ILMN_2075643 | ANKRD29      | 4.35E-04 | 0.64  |
| ILMN_1799024 | VAC14        | 4.35E-04 | 0.53  |
| ILMN_1773125 | ENTPD1       | 4.65E-04 | -0.52 |
| ILMN_1804277 | SPRED1       | 4.67E-04 | -0.69 |
| ILMN_1796216 | VASH1        | 4.73E-04 | -0.48 |
| ILMN_3273209 | FLJ10489     | 4.74E-04 | 0.34  |
| ILMN_1791211 | DOK2         | 4.74E-04 | -0.80 |
| ILMN_1807972 | MICAL1       | 4.80E-04 | 0.51  |
| ILMN_3237329 | FNIP2        | 4.83E-04 | 0.50  |
| ILMN_1678143 | ARHGDI1B     | 4.83E-04 | -0.52 |
| ILMN_2342579 | IL7R         | 4.84E-04 | -0.86 |
| ILMN_2138765 | PLIN2        | 4.86E-04 | 0.66  |
| ILMN_1688373 | LST1         | 4.87E-04 | -0.76 |
| ILMN_3240586 | PLD6         | 4.87E-04 | 0.52  |
| ILMN_1689585 | C20orf194    | 4.87E-04 | 0.54  |
| ILMN_1726873 | TPCN2        | 4.87E-04 | 0.57  |

|              |           |          |       |
|--------------|-----------|----------|-------|
| ILMN_1684045 | CDCA4     | 4.98E-04 | 0.43  |
| ILMN_1659936 | PPP1R15A  | 4.98E-04 | 0.62  |
| ILMN_1667371 | SLA       | 4.98E-04 | -0.60 |
| ILMN_1735910 | VMO1      | 4.98E-04 | -0.82 |
| ILMN_1727309 | FAM82A2   | 4.99E-04 | 0.54  |
| ILMN_1739792 | RHOG      | 5.01E-04 | -0.57 |
| ILMN_1707088 | DENND2D   | 5.01E-04 | 0.60  |
| ILMN_2048607 | ANKRD9    | 5.01E-04 | 0.58  |
| ILMN_1717056 | TXNRD1    | 5.01E-04 | 0.83  |
| ILMN_1749070 | HLA-DPB1  | 5.23E-04 | -0.31 |
| ILMN_1791647 | ASIP      | 5.23E-04 | 0.48  |
| ILMN_2140990 | CAMK1     | 5.23E-04 | -0.57 |
| ILMN_2137536 | ZZZ3      | 5.23E-04 | 0.77  |
| ILMN_1797875 | ALOX5AP   | 5.23E-04 | -0.93 |
| ILMN_1656045 | BRUNOL6   | 5.23E-04 | 0.32  |
| ILMN_2253732 | ST8SIA4   | 5.25E-04 | -0.67 |
| ILMN_1668012 | SLC25A13  | 5.27E-04 | 0.44  |
| ILMN_1804938 | GPR175    | 5.29E-04 | 0.69  |
| ILMN_2313782 | ATG4A     | 5.33E-04 | 0.59  |
| ILMN_1777519 | ITGB7     | 5.34E-04 | -0.86 |
| ILMN_1701906 | CD300C    | 5.44E-04 | -0.53 |
| ILMN_3289508 | LOC339192 | 5.45E-04 | -0.43 |
| ILMN_1652825 | IL10RA    | 5.55E-04 | -0.55 |
| ILMN_1715024 | LSS       | 5.58E-04 | 0.76  |
| ILMN_2379644 | CD74      | 5.58E-04 | -0.62 |
| ILMN_2365465 | XBP1      | 5.58E-04 | 0.60  |
| ILMN_1701386 | STRADB    | 5.58E-04 | 0.52  |
| ILMN_2152131 | ACTB      | 5.58E-04 | -0.66 |
| ILMN_1709204 | CLEC4A    | 5.58E-04 | -0.71 |
| ILMN_2125747 | LOC606724 | 5.60E-04 | -0.82 |
| ILMN_1793287 | LOC642755 | 5.60E-04 | 0.66  |
| ILMN_1764321 | ACOT4     | 5.79E-04 | 0.50  |
| ILMN_1775962 | MCOLN3    | 5.81E-04 | 0.49  |
| ILMN_2212763 | ICAM3     | 5.90E-04 | -0.50 |
| ILMN_1670134 | FADS1     | 5.91E-04 | 0.46  |
| ILMN_1658628 | C14orf72  | 5.97E-04 | 0.23  |
| ILMN_1681252 | C17orf44  | 6.04E-04 | -0.42 |
| ILMN_1755075 | IDI1      | 6.18E-04 | 0.50  |
| ILMN_1757186 | GIMAP1    | 6.19E-04 | -0.65 |
| ILMN_1738552 | SLC1A3    | 6.19E-04 | 0.67  |
| ILMN_1686109 | CCL23     | 6.21E-04 | -0.73 |
| ILMN_2109197 | EPB41L3   | 6.21E-04 | -0.60 |
| ILMN_2083469 | IRS2      | 6.21E-04 | 0.84  |
| ILMN_1741350 | CEP70     | 6.28E-04 | 0.24  |
| ILMN_2399300 | NAV2      | 6.28E-04 | 0.58  |
| ILMN_1806908 | PRKCB1    | 6.28E-04 | 0.55  |

|              |           |          |       |
|--------------|-----------|----------|-------|
| ILMN_2089329 | SPRY2     | 6.28E-04 | -0.58 |
| ILMN_1747305 | GIMAP8    | 6.28E-04 | -0.64 |
| ILMN_1661622 | TBC1D7    | 6.28E-04 | 0.53  |
| ILMN_1812278 | LY9       | 6.30E-04 | 0.86  |
| ILMN_1659352 | KCNK13    | 6.32E-04 | -0.66 |
| ILMN_2053415 | LDLR      | 6.32E-04 | 0.87  |
| ILMN_1676893 | ADCY3     | 6.41E-04 | 0.75  |
| ILMN_1703955 | FBXO32    | 6.42E-04 | 0.81  |
| ILMN_1723706 | GRAMD4    | 6.42E-04 | 0.46  |
| ILMN_1714170 | SPSB1     | 6.42E-04 | 0.45  |
| ILMN_1654819 | ZNF589    | 6.57E-04 | 0.43  |
| ILMN_1671554 | LPIN1     | 6.62E-04 | 0.53  |
| ILMN_1744968 | KCNAB1    | 6.66E-04 | 0.51  |
| ILMN_1676213 | SRPX2     | 6.72E-04 | -0.32 |
| ILMN_1696622 | SLC38A6   | 6.76E-04 | 0.52  |
| ILMN_1742544 | MEF2C     | 6.81E-04 | -0.62 |
| ILMN_1668063 | FCN1      | 6.81E-04 | -1.03 |
| ILMN_1685703 | ACOX2     | 6.85E-04 | -0.74 |
| ILMN_1679620 | LOC728519 | 6.95E-04 | -0.58 |
| ILMN_1786823 | ICAM2     | 6.95E-04 | -0.44 |
| ILMN_1800078 | LMO2      | 6.95E-04 | -0.75 |
| ILMN_1662618 | SQSTM1    | 6.97E-04 | 0.49  |
| ILMN_3235964 | HSPA7     | 6.97E-04 | -0.52 |
| ILMN_1726245 | TGFBR2    | 6.99E-04 | -0.63 |
| ILMN_1689655 | HLA-DRA   | 7.00E-04 | -0.56 |
| ILMN_1693452 | GAL3ST4   | 7.00E-04 | -0.97 |
| ILMN_1664718 | CYP51A1   | 7.09E-04 | 0.54  |
| ILMN_2401873 | DUSP10    | 7.15E-04 | 0.56  |
| ILMN_1872457 |           | 7.29E-04 | 0.36  |
| ILMN_1807919 | TNS1      | 7.29E-04 | 0.49  |
| ILMN_1669617 | GRB10     | 7.29E-04 | 0.50  |
| ILMN_1657871 | RSAD2     | 7.33E-04 | 0.86  |
| ILMN_1727194 | CALU      | 7.33E-04 | 0.51  |
| ILMN_1863994 |           | 7.39E-04 | 0.29  |
| ILMN_1727709 | GPBAR1    | 7.47E-04 | -0.81 |
| ILMN_1777296 | ACTB      | 7.50E-04 | -0.97 |
| ILMN_1798204 | IL21R     | 7.61E-04 | -0.37 |
| ILMN_1714417 | PSEN2     | 7.61E-04 | 0.58  |
| ILMN_1756937 | ST8SIA4   | 7.93E-04 | -0.49 |
| ILMN_1801043 | GSN       | 7.96E-04 | -0.50 |
| ILMN_1680109 | COL4A3BP  | 7.96E-04 | 0.64  |
| ILMN_1702320 | JAKMIP2   | 8.21E-04 | 0.71  |
| ILMN_2290118 | MEGF9     | 8.21E-04 | -0.59 |
| ILMN_1743367 | FZD4      | 8.22E-04 | 0.23  |
| ILMN_3245458 | SNORA61   | 8.27E-04 | 0.47  |
| ILMN_1710075 | FAM89A    | 8.33E-04 | 0.53  |

|              |           |          |       |
|--------------|-----------|----------|-------|
| ILMN_2200917 | SLC4A7    | 8.39E-04 | -0.78 |
| ILMN_1761199 | SLCO2B1   | 8.51E-04 | -0.70 |
| ILMN_1687306 | LGALS2    | 8.51E-04 | -0.56 |
| ILMN_1738866 | DEXI      | 8.62E-04 | 0.62  |
| ILMN_1735275 | WDSUB1    | 8.86E-04 | 0.52  |
| ILMN_1691846 | G0S2      | 8.86E-04 | 0.34  |
| ILMN_1754865 | LOC400455 | 8.86E-04 | 0.56  |
| ILMN_2172174 | NP        | 8.86E-04 | -0.45 |
| ILMN_2169490 | TDRD9     | 8.86E-04 | 0.54  |
| ILMN_1735827 | NISCH     | 8.86E-04 | -0.69 |
| ILMN_1781580 | BRI3      | 8.86E-04 | 0.50  |
| ILMN_1716596 | NSMAF     | 8.86E-04 | 0.52  |
| ILMN_1693210 | NSMCE2    | 8.91E-04 | 0.47  |
| ILMN_2394161 | ST8SIA4   | 8.91E-04 | -0.35 |
| ILMN_1768814 | KLHL6     | 8.91E-04 | 0.52  |
| ILMN_1814194 | TCF4      | 8.91E-04 | -0.42 |
| ILMN_2337263 | PKIB      | 8.91E-04 | -0.43 |
| ILMN_1770085 | BTG2      | 8.94E-04 | -0.45 |
| ILMN_1815552 | NTAN1     | 9.13E-04 | 0.69  |
| ILMN_1727466 | KCNMB4    | 9.17E-04 | -0.41 |
| ILMN_1727862 | HPS4      | 9.29E-04 | 0.29  |
| ILMN_2355033 | KIAA1147  | 9.35E-04 | -0.49 |
| ILMN_1682459 | TUBB4     | 9.35E-04 | 0.40  |
| ILMN_1800739 | SPINT2    | 9.35E-04 | -0.65 |
| ILMN_2387952 | FAM134B   | 9.43E-04 | 0.76  |
| ILMN_2054297 | PTGS2     | 9.71E-04 | -0.46 |
| ILMN_1679929 | KLF13     | 9.75E-04 | -0.60 |
| ILMN_1697309 | NCF1      | 9.75E-04 | -0.59 |
| ILMN_1770610 | MERTK     | 9.83E-04 | -0.62 |
| ILMN_1720270 | CDR2      | 9.88E-04 | 0.48  |
| ILMN_1687301 | VCAN      | 9.88E-04 | -0.54 |
| ILMN_1810199 | ASRGL1    | 9.93E-04 | 0.40  |
| ILMN_1720965 | TULP4     | 9.93E-04 | 0.47  |
| ILMN_1694731 | CLCN7     | 1.00E-03 | 0.45  |
| ILMN_1714765 | LOC389599 | 1.00E-03 | 0.43  |
| ILMN_1704531 | PTGR1     | 1.00E-03 | 0.55  |
| ILMN_1767349 | ABCB4     | 1.01E-03 | -0.24 |
| ILMN_1653712 | UAP1L1    | 1.02E-03 | 0.37  |
| ILMN_2400326 | DYRK3     | 1.02E-03 | 0.39  |
| ILMN_1689518 | PECAM1    | 1.03E-03 | -0.43 |
| ILMN_1766487 | LRRRC25   | 1.03E-03 | -0.47 |
| ILMN_1725312 | RASA1     | 1.03E-03 | -0.56 |
| ILMN_2297710 | PLEKHB2   | 1.04E-03 | 0.55  |
| ILMN_1659285 | PSMG1     | 1.05E-03 | 0.44  |
| ILMN_1702301 | DOCK10    | 1.05E-03 | -0.50 |
| ILMN_1700610 | CLEC7A    | 1.06E-03 | -0.50 |

|              |          |          |       |
|--------------|----------|----------|-------|
| ILMN_1705047 | TLR8     | 1.09E-03 | -0.39 |
| ILMN_1741392 | SLC25A20 | 1.09E-03 | -0.49 |
| ILMN_2157441 | HLA-DRA  | 1.10E-03 | -0.49 |
| ILMN_1768181 | TOR3A    | 1.10E-03 | 0.61  |
| ILMN_1719986 | PIK3IP1  | 1.10E-03 | 0.52  |
| ILMN_1785161 | CHCHD6   | 1.10E-03 | 0.53  |
| ILMN_1712026 | NLRP3    | 1.10E-03 | -0.53 |
| ILMN_1711408 | ANXA4    | 1.11E-03 | 0.33  |
| ILMN_1713679 | MREG     | 1.11E-03 | 0.35  |
| ILMN_1802106 | APOBEC3G | 1.14E-03 | -0.48 |
| ILMN_1659801 | ATP6V1C1 | 1.14E-03 | 0.44  |
| ILMN_1719867 | RNF13    | 1.14E-03 | 0.56  |
| ILMN_1656057 | PLAU     | 1.14E-03 | 0.64  |
| ILMN_1691410 | BAMBI    | 1.16E-03 | 0.54  |
| ILMN_1766165 | SNCA     | 1.16E-03 | 0.54  |
| ILMN_1707585 | SLC46A2  | 1.17E-03 | -0.41 |
| ILMN_1698209 | AGPS     | 1.17E-03 | 0.57  |
| ILMN_2185845 | BRSK1    | 1.17E-03 | -0.53 |
| ILMN_1811364 | SGPP2    | 1.17E-03 | 0.51  |
| ILMN_2316386 | GPBAR1   | 1.19E-03 | -0.82 |
| ILMN_2400322 | DYRK3    | 1.19E-03 | 0.31  |
| ILMN_1744212 | INPP5D   | 1.19E-03 | -0.51 |
| ILMN_2329914 | SPRY1    | 1.19E-03 | 0.40  |
| ILMN_1808769 | C1orf97  | 1.19E-03 | -0.37 |
| ILMN_1708611 | RDX      | 1.20E-03 | 0.70  |
| ILMN_1890253 |          | 1.20E-03 | 0.35  |
| ILMN_1697652 | PLEKHB2  | 1.23E-03 | 0.39  |
| ILMN_1713934 | LITAF    | 1.23E-03 | 0.56  |
| ILMN_1694268 | HES6     | 1.23E-03 | 0.67  |
| ILMN_1692785 | KLHL21   | 1.25E-03 | 0.39  |
| ILMN_1666049 | NUP214   | 1.25E-03 | -0.46 |
| ILMN_1803811 | TRIB1    | 1.25E-03 | -0.62 |
| ILMN_1787127 | SLC43A2  | 1.26E-03 | -0.51 |
| ILMN_1815023 | PIM1     | 1.26E-03 | 0.60  |
| ILMN_3229324 | SGK1     | 1.27E-03 | 0.70  |
| ILMN_1695475 | SEMA3C   | 1.27E-03 | 0.41  |
| ILMN_1785345 | GPR84    | 1.28E-03 | -0.57 |
| ILMN_1733390 | LARP1B   | 1.30E-03 | 0.31  |
| ILMN_1701195 | PLA2G7   | 1.32E-03 | 0.43  |
| ILMN_1725791 | PTPLA    | 1.32E-03 | 0.48  |
| ILMN_1796335 | LPCAT2   | 1.33E-03 | -0.56 |
| ILMN_1695711 | FAM105A  | 1.34E-03 | -0.49 |
| ILMN_2067656 | CCND2    | 1.34E-03 | -0.40 |
| ILMN_1710962 | TMEM97   | 1.34E-03 | 0.50  |
| ILMN_1764090 | AK3L1    | 1.34E-03 | 0.41  |
| ILMN_1721136 | H6PD     | 1.34E-03 | -0.34 |

|              |           |          |       |
|--------------|-----------|----------|-------|
| ILMN_1680782 | PATL1     | 1.34E-03 | 0.50  |
| ILMN_1705302 | FCGRT     | 1.34E-03 | -0.51 |
| ILMN_2165867 | DHCR7     | 1.35E-03 | 0.38  |
| ILMN_1772786 | KIF16B    | 1.35E-03 | 0.36  |
| ILMN_1813561 | SCIN      | 1.35E-03 | 0.66  |
| ILMN_1654370 | TESK2     | 1.35E-03 | 0.32  |
| ILMN_1910120 | LOC730092 | 1.35E-03 | 0.72  |
| ILMN_1726704 | RSC1A1    | 1.36E-03 | 0.33  |
| ILMN_1754076 | CACNA2D3  | 1.36E-03 | -0.62 |
| ILMN_1812759 | GCH1      | 1.36E-03 | -0.45 |
| ILMN_1797293 | SIGLEC15  | 1.36E-03 | 0.39  |
| ILMN_2145280 | DEF6      | 1.37E-03 | -0.71 |
| ILMN_1730628 | RNASE2    | 1.38E-03 | -0.64 |
| ILMN_2401258 | FAM13A    | 1.38E-03 | -0.53 |
| ILMN_1739032 | TMEM70    | 1.39E-03 | 0.34  |
| ILMN_1712082 | GCNT3     | 1.39E-03 | 0.56  |
| ILMN_1724609 | SLC2A8    | 1.39E-03 | 0.46  |
| ILMN_1663257 | ATP6V1C1  | 1.41E-03 | 0.33  |
| ILMN_1727402 | HCLS1     | 1.42E-03 | -0.63 |
| ILMN_2318685 | ABHD12    | 1.42E-03 | 0.41  |
| ILMN_1655244 | LOC642755 | 1.42E-03 | 0.58  |
| ILMN_1726981 | VEGFB     | 1.43E-03 | 0.51  |
| ILMN_1768505 | IL13RA1   | 1.44E-03 | -0.50 |
| ILMN_1801077 | PLIN2     | 1.46E-03 | 0.57  |
| ILMN_1711608 | SSBP2     | 1.46E-03 | -0.28 |
| ILMN_1785821 | TTRAP     | 1.46E-03 | 0.50  |
| ILMN_1793950 | P704P     | 1.48E-03 | -0.40 |
| ILMN_1748093 | PAFAH1B3  | 1.48E-03 | 0.50  |
| ILMN_1798543 | STK17B    | 1.49E-03 | -0.40 |
| ILMN_1758034 | ETFDH     | 1.51E-03 | -0.38 |
| ILMN_1712532 | CARD9     | 1.51E-03 | -0.88 |
| ILMN_1651705 | CAT       | 1.53E-03 | -0.48 |
| ILMN_1683859 | SLC7A1    | 1.53E-03 | 0.47  |
| ILMN_1701248 | TREM2     | 1.53E-03 | -0.46 |
| ILMN_1734353 | GPX4      | 1.55E-03 | 0.41  |
| ILMN_1811909 | LOC402221 | 1.55E-03 | -0.91 |
| ILMN_2341611 | CDCP1     | 1.56E-03 | -0.24 |
| ILMN_1700432 | ITPKB     | 1.56E-03 | 0.30  |
| ILMN_1692535 | DPP4      | 1.59E-03 | 0.60  |
| ILMN_1686989 | INSIG1    | 1.59E-03 | 0.50  |
| ILMN_1731048 | TLR1      | 1.59E-03 | -0.50 |
| ILMN_1696974 | ANG       | 1.60E-03 | -0.43 |
| ILMN_1657111 | C14orf78  | 1.60E-03 | 0.32  |
| ILMN_1756784 | FREQ      | 1.60E-03 | 0.46  |
| ILMN_2339835 | PTGS1     | 1.60E-03 | -0.49 |
| ILMN_1778161 | DNAJC25   | 1.60E-03 | 0.37  |

|              |           |          |       |
|--------------|-----------|----------|-------|
| ILMN_2312194 | CYB5A     | 1.61E-03 | 0.50  |
| ILMN_1704985 | CYP27A1   | 1.62E-03 | 0.77  |
| ILMN_2094266 | HES2      | 1.62E-03 | 0.62  |
| ILMN_1801307 | TNFSF10   | 1.62E-03 | -0.51 |
| ILMN_1782050 | CEBPD     | 1.62E-03 | -0.49 |
| ILMN_2207561 | C4orf16   | 1.62E-03 | 0.24  |
| ILMN_2184373 | IL8       | 1.62E-03 | 0.68  |
| ILMN_1655987 | STAB1     | 1.63E-03 | -0.88 |
| ILMN_2291954 | SLA       | 1.63E-03 | -0.39 |
| ILMN_1808047 | PHC2      | 1.63E-03 | -0.34 |
| ILMN_1767934 | PCSK5     | 1.63E-03 | -0.38 |
| ILMN_2332964 | LGMN      | 1.64E-03 | 0.43  |
| ILMN_1758864 | VNN2      | 1.64E-03 | -0.72 |
| ILMN_1808783 | STRBP     | 1.64E-03 | 0.44  |
| ILMN_1791569 | PLXNA1    | 1.65E-03 | 0.42  |
| ILMN_1809483 | HSD17B14  | 1.65E-03 | 0.52  |
| ILMN_1702899 | PLEKHA7   | 1.65E-03 | -0.27 |
| ILMN_1687751 | BAALC     | 1.65E-03 | 0.21  |
| ILMN_1765557 | OLFML2B   | 1.66E-03 | -0.47 |
| ILMN_1699772 | RRAGD     | 1.66E-03 | 0.51  |
| ILMN_1663631 | BANP      | 1.66E-03 | 0.82  |
| ILMN_1672589 | SEMA4B    | 1.67E-03 | -0.36 |
| ILMN_1718769 | ITSN1     | 1.74E-03 | -0.60 |
| ILMN_1657892 | TLR8      | 1.76E-03 | -0.44 |
| ILMN_1800626 | SESN1     | 1.76E-03 | -0.32 |
| ILMN_1671451 | LOC654201 | 1.76E-03 | 0.27  |
| ILMN_1658121 | CFP       | 1.77E-03 | -0.19 |
| ILMN_1758323 | ACPP      | 1.78E-03 | -0.29 |
| ILMN_3241378 | LOC728448 | 1.79E-03 | 0.44  |
| ILMN_1749338 | ANKRD29   | 1.79E-03 | 0.31  |
| ILMN_1803652 | C9orf91   | 1.81E-03 | 0.41  |
| ILMN_1763828 | MTF1      | 1.81E-03 | -0.47 |
| ILMN_2377496 | ERCC1     | 1.81E-03 | -0.40 |
| ILMN_2381899 | OPTN      | 1.82E-03 | 0.53  |
| ILMN_2180677 | ARMCX1    | 1.83E-03 | 0.43  |
| ILMN_1771800 | PRKCA     | 1.83E-03 | -0.46 |
| ILMN_2232712 | MYO10     | 1.83E-03 | 0.39  |
| ILMN_2202637 | CRY1      | 1.84E-03 | 0.38  |
| ILMN_1768595 | DLG4      | 1.88E-03 | -0.33 |
| ILMN_1672878 | ABR       | 1.88E-03 | 0.54  |
| ILMN_1843198 |           | 1.90E-03 | 0.43  |
| ILMN_1667068 | ZC3HAV1   | 1.91E-03 | -0.45 |
| ILMN_1717052 | STARD10   | 1.94E-03 | 0.31  |
| ILMN_2134974 | RAB38     | 1.94E-03 | 0.57  |
| ILMN_2415329 | SULT1C2   | 1.95E-03 | 0.21  |
| ILMN_2246661 | FAHD1     | 1.96E-03 | 0.48  |

|              |           |          |       |
|--------------|-----------|----------|-------|
| ILMN_1685625 | UCP2      | 1.98E-03 | -0.47 |
| ILMN_1799889 | ATP6V0D2  | 1.98E-03 | 0.74  |
| ILMN_1664631 | ADAM28    | 1.98E-03 | -0.30 |
| ILMN_1795183 | RNASE1    | 1.99E-03 | -0.43 |
| ILMN_1681101 | 42064     | 1.99E-03 | -0.70 |
| ILMN_1736863 | TMEM140   | 1.99E-03 | 0.56  |
| ILMN_1882512 |           | 2.00E-03 | 0.28  |
| ILMN_2285817 | FAM89A    | 2.00E-03 | 0.37  |
| ILMN_2094396 | LRRRC8C   | 2.00E-03 | -0.38 |
| ILMN_1749071 | CNIH3     | 2.02E-03 | 0.37  |
| ILMN_1748915 | S100A12   | 2.04E-03 | -0.36 |
| ILMN_1747622 | CD33      | 2.05E-03 | -0.52 |
| ILMN_1701216 | BANP      | 2.07E-03 | 0.72  |
| ILMN_1812618 | ARAP3     | 2.07E-03 | -0.40 |
| ILMN_2093343 | PLAC8     | 2.11E-03 | -1.06 |
| ILMN_1711102 | B3GNT2    | 2.12E-03 | 0.44  |
| ILMN_1753183 | CDCA4     | 2.13E-03 | 0.33  |
| ILMN_2294762 | AMY1A     | 2.14E-03 | -0.66 |
| ILMN_1723260 | ETV5      | 2.14E-03 | -0.44 |
| ILMN_1681301 | AIM2      | 2.14E-03 | -0.50 |
| ILMN_1755364 | RALA      | 2.14E-03 | 0.65  |
| ILMN_1771688 | RAB7B     | 2.14E-03 | -0.40 |
| ILMN_2323992 | CLEC7A    | 2.14E-03 | -0.55 |
| ILMN_1680344 | MYOM1     | 2.18E-03 | -0.34 |
| ILMN_1746846 | TTLL4     | 2.18E-03 | 0.34  |
| ILMN_1752947 | C17orf79  | 2.18E-03 | 0.45  |
| ILMN_1742167 | TUBA1C    | 2.18E-03 | -0.47 |
| ILMN_1730032 | BOK       | 2.19E-03 | 0.46  |
| ILMN_1801864 | LOC730455 | 2.19E-03 | 0.57  |
| ILMN_1695759 | AMDHD2    | 2.21E-03 | 0.39  |
| ILMN_3279712 | LOC642590 | 2.22E-03 | 0.52  |
| ILMN_2305544 | DBI       | 2.25E-03 | 0.40  |
| ILMN_1753135 | ALK       | 2.25E-03 | 1.14  |
| ILMN_1651296 | LOC143666 | 2.25E-03 | 0.21  |
| ILMN_1766896 | ZDHHC19   | 2.28E-03 | 0.32  |
| ILMN_1706498 | DSE       | 2.34E-03 | -0.52 |
| ILMN_2376520 | PPP2R3A   | 2.34E-03 | -0.26 |
| ILMN_2294978 | RNASE4    | 2.37E-03 | -0.40 |
| ILMN_1809417 | LRFN4     | 2.38E-03 | 0.19  |
| ILMN_1799848 | ANKRD22   | 2.41E-03 | -0.41 |
| ILMN_2207504 | LEP       | 2.41E-03 | 1.62  |
| ILMN_2097858 | KIAA1737  | 2.42E-03 | 0.41  |
| ILMN_1755974 | ALDOC     | 2.43E-03 | 0.45  |
| ILMN_3306997 | METTTL1   | 2.46E-03 | 0.40  |
| ILMN_1698019 | LGMN      | 2.48E-03 | 0.36  |
| ILMN_2115434 | RAB32     | 2.48E-03 | 0.42  |



|              |           |          |       |
|--------------|-----------|----------|-------|
| ILMN_1696317 | CACNA2D4  | 2.49E-03 | -0.33 |
| ILMN_1652677 | FAM89A    | 2.56E-03 | 0.32  |
| ILMN_1674243 | TFRC      | 2.57E-03 | 0.87  |
| ILMN_1722855 | VEGFB     | 2.60E-03 | 0.34  |
| ILMN_1717934 | SYT11     | 2.60E-03 | -0.43 |
| ILMN_1744113 | TNFAIP8L2 | 2.62E-03 | -0.44 |
| ILMN_2160476 | CCL22     | 2.62E-03 | -0.53 |
| ILMN_1792518 | STX7      | 2.64E-03 | 0.51  |
| ILMN_1682312 | CYBB      | 2.64E-03 | -0.54 |
| ILMN_1709820 | AOAH      | 2.68E-03 | -0.57 |
| ILMN_3247506 | FCGR1C    | 2.71E-03 | -0.39 |
| ILMN_1751075 | SETD4     | 2.72E-03 | 0.20  |
| ILMN_1713603 | PRKCB1    | 2.74E-03 | 0.31  |
| ILMN_1676984 | DDIT3     | 2.74E-03 | 0.79  |
| ILMN_2112988 | NCF1C     | 2.74E-03 | -0.46 |
| ILMN_3251217 | PDXDC2    | 2.76E-03 | 0.27  |
| ILMN_1666932 | FCGR2A    | 2.76E-03 | -0.59 |
| ILMN_2401878 | DUSP10    | 2.78E-03 | 0.45  |
| ILMN_1733515 | LOXL3     | 2.78E-03 | -0.36 |
| ILMN_1704084 | CMAH      | 2.79E-03 | -0.20 |
| ILMN_1712389 | CKLF      | 2.80E-03 | -0.52 |
| ILMN_2401253 | FAM13A    | 2.80E-03 | -0.29 |
| ILMN_1777061 | ZSWIM6    | 2.82E-03 | -0.46 |
| ILMN_2148785 | GBP1      | 2.83E-03 | -0.69 |
| ILMN_1711223 | LOC649362 | 2.85E-03 | -0.56 |
| ILMN_1678353 | FARP1     | 2.85E-03 | 0.29  |
| ILMN_1761159 | ESYT1     | 2.89E-03 | 0.40  |
| ILMN_1807662 | IGF2R     | 2.96E-03 | 0.44  |
| ILMN_1786273 | C1orf122  | 2.96E-03 | -0.38 |
| ILMN_1801710 | APBB1IP   | 2.96E-03 | -0.38 |
| ILMN_1721833 | IER5      | 2.97E-03 | -0.43 |
| ILMN_3307926 | ADRBK1    | 2.97E-03 | -0.47 |
| ILMN_1788024 | PCID2     | 3.00E-03 | 0.46  |
| ILMN_1734543 | PTPRE     | 3.03E-03 | -0.41 |
| ILMN_1797522 | DUSP3     | 3.06E-03 | 0.49  |
| ILMN_1736597 | TKT       | 3.06E-03 | 0.43  |
| ILMN_1700143 | FRMD4B    | 3.06E-03 | -0.39 |
| ILMN_1703074 | CPD       | 3.06E-03 | 0.44  |
| ILMN_1774077 | GBP2      | 3.11E-03 | -0.41 |
| ILMN_1788283 | COTL1     | 3.15E-03 | -0.55 |
| ILMN_1685057 | SLC22A4   | 3.15E-03 | -0.31 |
| ILMN_1670870 | ALCAM     | 3.15E-03 | -0.43 |
| ILMN_1702389 | ZC3H3     | 3.15E-03 | 0.35  |
| ILMN_1758623 | HIST1H2BD | 3.16E-03 | -0.50 |
| ILMN_2198812 | FDX1      | 3.16E-03 | 0.39  |
| ILMN_1677946 | LOC653764 | 3.16E-03 | 0.25  |

|              |              |          |       |
|--------------|--------------|----------|-------|
| ILMN_1756862 | APOL3        | 3.17E-03 | -0.39 |
| ILMN_1704537 | PHGDH        | 3.18E-03 | 0.84  |
| ILMN_1708167 | CDCP1        | 3.19E-03 | -0.22 |
| ILMN_1752526 | RNF144B      | 3.23E-03 | -0.33 |
| ILMN_2221046 | GM2A         | 3.28E-03 | 0.56  |
| ILMN_2324672 | USF2         | 3.28E-03 | 0.47  |
| ILMN_3248263 | CCDC93       | 3.28E-03 | 0.41  |
| ILMN_1771019 | MTMR4        | 3.30E-03 | 0.37  |
| ILMN_1704369 | LIMA1        | 3.31E-03 | -0.44 |
| ILMN_2087656 | SLCO2B1      | 3.32E-03 | -0.49 |
| ILMN_1675186 | ME2          | 3.32E-03 | -0.49 |
| ILMN_1683923 | MT1H         | 3.39E-03 | -0.54 |
| ILMN_1676480 | LOC654053    | 3.42E-03 | -0.26 |
| ILMN_1697554 | SASH3        | 3.44E-03 | -0.48 |
| ILMN_1805643 | RILPL1       | 3.44E-03 | 0.47  |
| ILMN_1740742 | UROD         | 3.45E-03 | 0.47  |
| ILMN_1776649 | LRRK2        | 3.45E-03 | -0.49 |
| ILMN_1809433 | XBP1         | 3.49E-03 | 0.51  |
| ILMN_3235221 | LOC644936    | 3.49E-03 | -0.91 |
| ILMN_1763447 | PLXNB2       | 3.53E-03 | -0.38 |
| ILMN_1795918 | CENTG3       | 3.53E-03 | 0.34  |
| ILMN_1769388 | GJB2         | 3.55E-03 | 0.95  |
| ILMN_1681503 | MCM2         | 3.63E-03 | 0.19  |
| ILMN_2275742 | DNASE2B      | 3.64E-03 | 0.44  |
| ILMN_1750256 | ALS2         | 3.66E-03 | 0.39  |
| ILMN_1758798 | LOC728734    | 3.66E-03 | 0.30  |
| ILMN_1683475 | TOMM40       | 3.66E-03 | 0.56  |
| ILMN_2050654 | SAV1         | 3.67E-03 | 0.27  |
| ILMN_1760778 | ENG          | 3.68E-03 | -0.49 |
| ILMN_1783023 | C5orf51      | 3.70E-03 | 0.38  |
| ILMN_1719696 | PLD1         | 3.70E-03 | 0.38  |
| ILMN_1654118 | BCL2L1       | 3.76E-03 | 0.40  |
| ILMN_1712628 | GTF2IRD1     | 3.78E-03 | 0.19  |
| ILMN_3239965 | IDO1         | 3.78E-03 | -0.60 |
| ILMN_3198367 | LOC646347    | 3.78E-03 | 0.58  |
| ILMN_1803788 | LGALS3       | 3.78E-03 | 0.61  |
| ILMN_1779264 | PSMG1        | 3.78E-03 | 0.34  |
| ILMN_1801616 | EMP1         | 3.78E-03 | 0.55  |
| ILMN_3261938 | LOC100130154 | 3.78E-03 | -0.37 |
| ILMN_1685005 | TNFRSF1A     | 3.78E-03 | -0.40 |
| ILMN_1663042 | SDC4         | 3.78E-03 | 0.30  |
| ILMN_2358069 | MAD1L1       | 3.84E-03 | 0.43  |
| ILMN_3190833 | CCRL2        | 3.84E-03 | 0.58  |
| ILMN_1760121 | RRAGC        | 3.87E-03 | 0.44  |
| ILMN_1766079 | SULT1C2      | 3.91E-03 | 0.22  |
| ILMN_1794011 | CHST2        | 3.95E-03 | -0.38 |

|              |           |          |       |
|--------------|-----------|----------|-------|
| ILMN_1741171 | TM2D2     | 3.96E-03 | -0.31 |
| ILMN_3305938 | SGK1      | 3.98E-03 | 0.61  |
| ILMN_1737406 | KLF6      | 3.98E-03 | 0.56  |
| ILMN_1780057 | RENBP     | 3.99E-03 | 0.43  |
| ILMN_2368773 | FAM3C     | 4.03E-03 | 0.29  |
| ILMN_1675797 | EPDR1     | 4.03E-03 | 0.51  |
| ILMN_1752579 | ATP6V0A1  | 4.03E-03 | 0.36  |
| ILMN_1703558 | FHL3      | 4.03E-03 | -0.31 |
| ILMN_1775330 | C15orf52  | 4.03E-03 | 0.40  |
| ILMN_2261600 | FCGR1B    | 4.03E-03 | -0.49 |
| ILMN_1677768 | POR       | 4.08E-03 | 0.42  |
| ILMN_1785071 | SEPP1     | 4.10E-03 | -0.49 |
| ILMN_1683658 | FKBP1A    | 4.11E-03 | -0.35 |
| ILMN_1788192 | ARMCX1    | 4.13E-03 | 0.48  |
| ILMN_1741727 | QPCT      | 4.14E-03 | -0.50 |
| ILMN_2136089 | MTE       | 4.14E-03 | -0.61 |
| ILMN_1713751 | ADAM19    | 4.15E-03 | -0.72 |
| ILMN_2345898 | SLA       | 4.15E-03 | -0.46 |
| ILMN_1672660 | MBP       | 4.15E-03 | 0.40  |
| ILMN_2400922 | OPRL1     | 4.18E-03 | -0.51 |
| ILMN_1710078 | TMEM181   | 4.19E-03 | 0.40  |
| ILMN_1665510 | ERRFI1    | 4.19E-03 | 0.30  |
| ILMN_1705985 | PIGA      | 4.21E-03 | 0.36  |
| ILMN_1769705 | LOC440093 | 4.21E-03 | -0.39 |
| ILMN_1801236 | SPG20     | 4.23E-03 | 0.25  |
| ILMN_1677736 | TMEM104   | 4.25E-03 | 0.17  |
| ILMN_1699856 | RALGDS    | 4.26E-03 | 0.48  |
| ILMN_1715273 | PICALM    | 4.26E-03 | -0.42 |
| ILMN_1800091 | RARRES1   | 4.30E-03 | 0.45  |
| ILMN_1738656 | GLOD4     | 4.31E-03 | 0.37  |
| ILMN_1714167 | CYB5A     | 4.31E-03 | 0.45  |
| ILMN_1730660 | GALIG     | 4.35E-03 | 0.30  |
| ILMN_1762594 | NOD2      | 4.35E-03 | -0.32 |
| ILMN_1687284 | USP12     | 4.35E-03 | 0.27  |
| ILMN_2093980 | TMEM38B   | 4.35E-03 | 0.20  |
| ILMN_1666733 | IL8       | 4.36E-03 | 0.80  |
| ILMN_1758281 | CALCRL    | 4.38E-03 | -0.24 |
| ILMN_1762529 | SLC12A8   | 4.40E-03 | 0.59  |
| ILMN_2053178 | ACTG1     | 4.40E-03 | -0.53 |
| ILMN_1743711 | LOC650215 | 4.41E-03 | 0.53  |
| ILMN_1758128 | CYGB      | 4.41E-03 | 0.31  |
| ILMN_2309180 | SMARCD3   | 4.41E-03 | 0.33  |
| ILMN_1673548 | HSPC159   | 4.44E-03 | 0.22  |
| ILMN_1755658 | ABI3      | 4.45E-03 | -0.42 |
| ILMN_2098446 | PMAIP1    | 4.45E-03 | -0.30 |
| ILMN_1768812 | FXVD6     | 4.50E-03 | 0.40  |

|              |           |          |       |
|--------------|-----------|----------|-------|
| ILMN_2106725 | NCF1B     | 4.50E-03 | -0.26 |
| ILMN_1660364 | PSCD4     | 4.51E-03 | -0.38 |
| ILMN_1808405 | HLA-DQA1  | 4.53E-03 | -0.53 |
| ILMN_1746408 | MIDN      | 4.57E-03 | -0.39 |
| ILMN_2337655 | WARS      | 4.57E-03 | 0.50  |
| ILMN_1792922 | SOD2      | 4.58E-03 | 0.30  |
| ILMN_1692539 | SH3BP1    | 4.62E-03 | -0.34 |
| ILMN_2043809 | PFKM      | 4.64E-03 | 0.73  |
| ILMN_1678579 | CPT2      | 4.64E-03 | -0.40 |
| ILMN_1718977 | GADD45B   | 4.66E-03 | 0.30  |
| ILMN_1802100 | ADAM28    | 4.67E-03 | -0.29 |
| ILMN_2063925 | CTNBL1    | 4.69E-03 | 0.46  |
| ILMN_1770824 | ARHGAP4   | 4.70E-03 | -0.51 |
| ILMN_1786041 | ASB9      | 4.72E-03 | -0.20 |
| ILMN_1743032 | CTSS      | 4.72E-03 | 0.41  |
| ILMN_1811110 | TDRD9     | 4.72E-03 | 0.37  |
| ILMN_2138589 | MERTK     | 4.72E-03 | -0.54 |
| ILMN_1805098 | PDE1B     | 4.72E-03 | -0.20 |
| ILMN_1793410 | SNTB1     | 4.74E-03 | 0.49  |
| ILMN_1746673 | 42250     | 4.74E-03 | 0.31  |
| ILMN_2168217 | EBI2      | 4.74E-03 | 0.54  |
| ILMN_1798706 | EBI2      | 4.75E-03 | 0.55  |
| ILMN_1709484 | BLM       | 4.75E-03 | 0.18  |
| ILMN_1660086 | MYH11     | 4.75E-03 | -0.28 |
| ILMN_2145116 | TMEM173   | 4.79E-03 | -0.56 |
| ILMN_3251436 | DENND4C   | 4.80E-03 | 0.27  |
| ILMN_1768534 | BHLHB2    | 4.81E-03 | 0.55  |
| ILMN_1810100 | PBX3      | 4.82E-03 | 0.40  |
| ILMN_1749006 | RCSD1     | 4.83E-03 | -0.38 |
| ILMN_3294322 | LOC441009 | 4.86E-03 | -0.32 |
| ILMN_1674394 | C2orf3    | 4.86E-03 | -0.33 |
| ILMN_1736327 | CDC42EP3  | 4.86E-03 | 0.13  |
| ILMN_1800837 | CFDP1     | 4.86E-03 | 0.36  |
| ILMN_1787657 | CLDN12    | 4.86E-03 | 0.34  |
| ILMN_1743933 | TSHZ3     | 4.86E-03 | -0.44 |
| ILMN_2348487 | EMR3      | 4.90E-03 | -0.39 |
| ILMN_1724407 | TACC3     | 4.95E-03 | -0.38 |
| ILMN_1768553 | LOC283050 | 4.95E-03 | 0.45  |
| ILMN_2311989 | CUTA      | 4.95E-03 | 0.36  |
| ILMN_1713124 | AKR1C3    | 4.95E-03 | 0.46  |
| ILMN_1812688 | C2orf18   | 4.95E-03 | 0.35  |
| ILMN_1752046 | SH2B3     | 4.95E-03 | -0.50 |
| ILMN_1792885 | CTSC      | 4.98E-03 | -0.41 |
| ILMN_1784709 | GNPDA1    | 4.98E-03 | 0.43  |
| ILMN_1675191 | GAPT      | 4.98E-03 | -0.87 |
| ILMN_2076463 | SLC15A4   | 4.99E-03 | 0.39  |

|              |              |          |       |
|--------------|--------------|----------|-------|
| ILMN_3192446 | LOC100128410 | 5.00E-03 | 0.27  |
| ILMN_1785202 | STAT4        | 5.05E-03 | -0.51 |
| ILMN_2073604 | EBP          | 5.09E-03 | 0.29  |
| ILMN_1708743 | NT5DC2       | 5.09E-03 | -0.27 |
| ILMN_1764964 | IFNGR2       | 5.09E-03 | -0.42 |
| ILMN_1715131 | CCR7         | 5.09E-03 | 0.50  |
| ILMN_1804988 | MOAP1        | 5.09E-03 | 0.43  |
| ILMN_1742547 | NRP1         | 5.09E-03 | -0.32 |
| ILMN_3237850 | C5orf51      | 5.09E-03 | 0.45  |
| ILMN_1784553 | SDC2         | 5.09E-03 | -0.33 |
| ILMN_2361603 | NDRG2        | 5.09E-03 | -0.59 |
| ILMN_1756590 | SYS1         | 5.09E-03 | 0.38  |
| ILMN_1659029 | FAM116B      | 5.11E-03 | -0.37 |
| ILMN_1751941 | LOC728772    | 5.17E-03 | -0.43 |
| ILMN_1669881 | TSPAN13      | 5.20E-03 | -0.31 |
| ILMN_2391150 | FILIP1L      | 5.24E-03 | -0.21 |
| ILMN_1766637 | GLA          | 5.24E-03 | 0.45  |
| ILMN_2406501 | SOD2         | 5.24E-03 | 0.60  |
| ILMN_1737255 | C22orf36     | 5.24E-03 | 0.14  |
| ILMN_3299520 | PRKCB        | 5.24E-03 | 0.35  |
| ILMN_2338452 | SERPINA1     | 5.24E-03 | -0.43 |
| ILMN_2379967 | FCAR         | 5.24E-03 | -0.29 |
| ILMN_1701114 | GBP1         | 5.24E-03 | -0.56 |
| ILMN_1727798 | MOSPD1       | 5.24E-03 | 0.31  |
| ILMN_2357438 | AURKA        | 5.25E-03 | -0.28 |
| ILMN_2132599 | ANKRD22      | 5.27E-03 | -0.47 |
| ILMN_1784320 | ELMO1        | 5.27E-03 | -0.34 |
| ILMN_2409384 | SIGLEC7      | 5.28E-03 | -0.31 |
| ILMN_1696294 | SNX6         | 5.29E-03 | -0.17 |
| ILMN_1811330 | FAM134B      | 5.33E-03 | 0.56  |
| ILMN_1738554 | LOC647346    | 5.33E-03 | 0.30  |
| ILMN_1666545 | GCNT1        | 5.33E-03 | -0.77 |
| ILMN_2050911 | SLC22A4      | 5.48E-03 | -0.33 |
| ILMN_2225537 | PTGR1        | 5.50E-03 | 0.59  |
| ILMN_1751901 | TMEM163      | 5.50E-03 | 0.50  |
| ILMN_1655068 | TOM1L2       | 5.54E-03 | 0.30  |
| ILMN_1762713 | C19orf59     | 5.54E-03 | -0.34 |
| ILMN_1655702 | ABHD5        | 5.59E-03 | 0.42  |
| ILMN_2398107 | ASNS         | 5.68E-03 | 0.27  |
| ILMN_1809467 | VAMP5        | 5.69E-03 | -0.51 |
| ILMN_1772387 | TLR2         | 5.69E-03 | -0.30 |
| ILMN_1743538 | MLLT10       | 5.70E-03 | 0.31  |
| ILMN_1675656 | PPFIBP2      | 5.71E-03 | 0.35  |
| ILMN_2234697 | BEX1         | 5.74E-03 | -0.58 |
| ILMN_1726327 | AMY1B        | 5.74E-03 | -0.35 |
| ILMN_2292123 | COL4A3BP     | 5.74E-03 | 0.32  |

|              |           |          |       |
|--------------|-----------|----------|-------|
| ILMN_1722622 | CD163     | 5.77E-03 | -0.57 |
| ILMN_1789130 | DNASE2B   | 5.77E-03 | 0.34  |
| ILMN_1772292 | LOC653752 | 5.84E-03 | 0.20  |
| ILMN_3243928 | DDX60L    | 5.84E-03 | 0.32  |
| ILMN_1715809 | OGFRL1    | 5.84E-03 | 0.34  |
| ILMN_1808354 | SLC4A7    | 5.89E-03 | -0.36 |
| ILMN_1800602 | GCA       | 5.92E-03 | -0.41 |
| ILMN_1675584 | HTRA4     | 5.97E-03 | 0.29  |
| ILMN_1743275 | SH3RF3    | 5.98E-03 | 0.28  |
| ILMN_1694780 | GCHFR     | 5.99E-03 | 0.53  |
| ILMN_1703969 | KIAA0251  | 5.99E-03 | 0.32  |
| ILMN_1693410 | BRI3BP    | 6.00E-03 | -0.28 |
| ILMN_3210914 | LOC344887 | 6.00E-03 | 0.25  |
| ILMN_1652736 | RPS6KA3   | 6.00E-03 | -0.34 |
| ILMN_1714278 | C9orf30   | 6.00E-03 | 0.48  |
| ILMN_1864166 |           | 6.00E-03 | -0.19 |
| ILMN_1716276 | CCL4L2    | 6.01E-03 | -0.53 |
| ILMN_1777233 | E2F2      | 6.02E-03 | 0.49  |
| ILMN_3199755 | LOC646821 | 6.02E-03 | -0.33 |
| ILMN_1814022 | NR1H3     | 6.04E-03 | 0.43  |
| ILMN_2082314 | TOM1      | 6.26E-03 | 0.37  |
| ILMN_1721977 | ARD1A     | 6.26E-03 | -0.31 |
| ILMN_1653220 | PITPNM1   | 6.26E-03 | -0.31 |
| ILMN_1705570 | H2AFY2    | 6.26E-03 | 0.38  |
| ILMN_2404154 | SERPINA1  | 6.26E-03 | -0.43 |
| ILMN_1723962 | LXN       | 6.28E-03 | 0.61  |
| ILMN_1790533 | PHACTR2   | 6.28E-03 | -0.33 |
| ILMN_1811029 | TLK1      | 6.28E-03 | 0.31  |
| ILMN_2176063 | FCGR1A    | 6.29E-03 | -0.42 |
| ILMN_1730710 | ADORA3    | 6.29E-03 | -0.96 |
| ILMN_1715214 | PTPN7     | 6.29E-03 | -0.29 |
| ILMN_2174574 | HNRNPA3P1 | 6.30E-03 | -0.27 |
| ILMN_1796349 | SMPDL3A   | 6.31E-03 | -0.43 |
| ILMN_2267787 | HPS1      | 6.34E-03 | 0.42  |
| ILMN_1805902 | ELA1      | 6.34E-03 | -0.23 |
| ILMN_2337740 | TULP4     | 6.34E-03 | 0.31  |
| ILMN_1677085 | RGS19     | 6.40E-03 | -0.50 |
| ILMN_1810584 | IL1R1     | 6.40E-03 | 0.41  |
| ILMN_1712390 | CUTA      | 6.45E-03 | 0.43  |
| ILMN_1842850 |           | 6.46E-03 | 0.21  |
| ILMN_2277676 | ERCC1     | 6.47E-03 | -0.38 |
| ILMN_2078592 | C6orf105  | 6.49E-03 | 0.24  |
| ILMN_1711617 | GMFG      | 6.56E-03 | -0.47 |
| ILMN_1770290 | CNN2      | 6.56E-03 | -0.51 |
| ILMN_1794074 | MXI1      | 6.56E-03 | 0.20  |
| ILMN_1659470 | PBRM1     | 6.56E-03 | 0.33  |

|              |           |          |       |
|--------------|-----------|----------|-------|
| ILMN_1765523 | TOLLIP    | 6.59E-03 | 0.28  |
| ILMN_2369603 | CPEB1     | 6.64E-03 | 0.22  |
| ILMN_2358457 | ATF4      | 6.66E-03 | 0.40  |
| ILMN_1763500 | GPR82     | 6.66E-03 | -0.24 |
| ILMN_1658504 | CHKA      | 6.72E-03 | 0.46  |
| ILMN_1749878 | FAM124B   | 6.73E-03 | -0.10 |
| ILMN_2393296 | GK        | 6.74E-03 | 0.45  |
| ILMN_1796417 | ASNS      | 6.75E-03 | 0.33  |
| ILMN_1724236 | FUT7      | 6.75E-03 | -0.17 |
| ILMN_1681016 | SPNS1     | 6.75E-03 | 0.43  |
| ILMN_1716507 | EPB41L1   | 6.76E-03 | 0.19  |
| ILMN_1780306 | DDHD1     | 6.77E-03 | 0.14  |
| ILMN_1662640 | C20orf127 | 6.79E-03 | -0.49 |
| ILMN_1656310 | INDO      | 6.79E-03 | -0.49 |
| ILMN_2161556 | C12orf49  | 6.79E-03 | 0.28  |
| ILMN_1716264 | ANKRD1    | 6.85E-03 | 0.17  |
| ILMN_2094942 | 42064     | 6.85E-03 | -0.36 |
| ILMN_1665331 | AMT       | 6.88E-03 | -0.30 |
| ILMN_3244550 | LOC642413 | 6.90E-03 | 0.29  |
| ILMN_1711514 | COCH      | 6.90E-03 | -0.26 |
| ILMN_1805827 | PPA1      | 6.90E-03 | -0.52 |
| ILMN_1804396 | C14orf4   | 6.90E-03 | -0.52 |
| ILMN_1707720 | SLC1A5    | 6.90E-03 | 0.29  |
| ILMN_1736567 | CD74      | 6.97E-03 | -0.45 |
| ILMN_1779076 | HINT3     | 6.97E-03 | 0.28  |
| ILMN_1742089 | NLN       | 6.97E-03 | 0.33  |
| ILMN_2188374 | XPOT      | 6.97E-03 | 0.32  |
| ILMN_1739050 | PIPOX     | 7.00E-03 | -0.12 |
| ILMN_1747020 | SGK3      | 7.03E-03 | 0.34  |
| ILMN_2246328 | PTPN22    | 7.03E-03 | -0.35 |
| ILMN_1821176 |           | 7.04E-03 | -0.42 |
| ILMN_1779470 | ABCG4     | 7.04E-03 | 0.25  |
| ILMN_1911721 |           | 7.04E-03 | -0.34 |
| ILMN_2293322 | MTHFD2    | 7.04E-03 | 0.09  |
| ILMN_1654518 | LRCH4     | 7.05E-03 | -0.31 |
| ILMN_1653026 | PLAC8     | 7.05E-03 | -1.00 |
| ILMN_1746492 | RABL4     | 7.08E-03 | 0.27  |
| ILMN_1791905 | CCDC103   | 7.12E-03 | -0.24 |
| ILMN_1780533 | RNASE6    | 7.13E-03 | -0.52 |
| ILMN_1695590 | ADRB2     | 7.13E-03 | -0.44 |
| ILMN_1781983 | AP1B1     | 7.19E-03 | -0.41 |
| ILMN_1712914 | SEMA6B    | 7.20E-03 | 0.38  |
| ILMN_1795865 | FGFRL1    | 7.20E-03 | 0.21  |
| ILMN_1671509 | CCL3      | 7.20E-03 | -0.38 |
| ILMN_1715555 | DBP       | 7.20E-03 | 0.27  |
| ILMN_1720889 | SC4MOL    | 7.20E-03 | 0.67  |

|              |               |          |       |
|--------------|---------------|----------|-------|
| ILMN_2316878 | PTPRO         | 7.20E-03 | -0.41 |
| ILMN_1652680 | LOC652616     | 7.31E-03 | -0.37 |
| ILMN_1722981 | TLR5          | 7.31E-03 | 0.32  |
| ILMN_1723846 | FAM119B       | 7.31E-03 | 0.31  |
| ILMN_1725471 | GK            | 7.32E-03 | 0.47  |
| ILMN_2358919 | TP53I3        | 7.33E-03 | -0.40 |
| ILMN_1765578 | TIPARP        | 7.33E-03 | 0.38  |
| ILMN_1680925 | SLC9A3R1      | 7.34E-03 | 0.29  |
| ILMN_1685009 | ITGAM         | 7.36E-03 | -0.31 |
| ILMN_1677511 | PTGS2         | 7.37E-03 | -0.20 |
| ILMN_1784523 | ATP6V1G1      | 7.37E-03 | 0.49  |
| ILMN_2154455 | ZNF330        | 7.37E-03 | 0.37  |
| ILMN_1745034 | SLC11A2       | 7.37E-03 | 0.38  |
| ILMN_1796339 | PLEKHA2       | 7.37E-03 | 0.46  |
| ILMN_1802292 | WDFY2         | 7.38E-03 | -0.27 |
| ILMN_1757872 | DKFZp761P0423 | 7.46E-03 | -0.33 |
| ILMN_1771003 | HAUS4         | 7.53E-03 | -0.38 |
| ILMN_1733311 | PIGB          | 7.54E-03 | -0.32 |
| ILMN_3242586 | RHOU          | 7.56E-03 | -0.43 |
| ILMN_2225318 | SMS           | 7.61E-03 | 0.53  |
| ILMN_1699071 | C21orf7       | 7.62E-03 | -0.38 |
| ILMN_1782488 | RNASEH2B      | 7.62E-03 | 0.33  |
| ILMN_1807493 | ACVRL1        | 7.62E-03 | -0.20 |
| ILMN_2081883 | IQCK          | 7.64E-03 | 0.37  |
| ILMN_2413644 | TM4SF19       | 7.68E-03 | 0.46  |
| ILMN_1674698 | AARS2         | 7.75E-03 | -0.25 |
| ILMN_2269136 | AGAP3         | 7.75E-03 | 0.45  |
| ILMN_1768816 | TMPO          | 7.76E-03 | -0.19 |
| ILMN_1653466 | HES4          | 7.76E-03 | 0.49  |
| ILMN_1696591 | RB1           | 7.77E-03 | -0.49 |
| ILMN_1750062 | PPARGC1A      | 7.77E-03 | 0.18  |
| ILMN_1775937 | DDB1          | 7.77E-03 | 0.40  |
| ILMN_1765146 | IFNAR2        | 7.79E-03 | -0.33 |
| ILMN_2324421 | TXNRD1        | 7.84E-03 | 0.59  |
| ILMN_1708248 | LILRB1        | 7.84E-03 | -0.18 |
| ILMN_1803392 | TAX1BP3       | 7.84E-03 | -0.44 |
| ILMN_1738558 | RGS20         | 8.06E-03 | 0.46  |
| ILMN_1784300 | TUBA4A        | 8.06E-03 | -0.41 |
| ILMN_1679731 | SLC15A4       | 8.07E-03 | 0.32  |
| ILMN_1710207 | C10orf6       | 8.08E-03 | 0.27  |
| ILMN_1656011 | RGS1          | 8.18E-03 | 0.37  |
| ILMN_1776435 | GPRIN3        | 8.20E-03 | -0.30 |
| ILMN_1796177 | GIPC1         | 8.20E-03 | 0.36  |
| ILMN_2414027 | CKLF          | 8.21E-03 | -0.51 |
| ILMN_1815874 | NANS          | 8.23E-03 | 0.31  |
| ILMN_1760593 | CRY1          | 8.23E-03 | 0.26  |



|              |           |          |       |
|--------------|-----------|----------|-------|
| ILMN_1781986 | UCRC      | 8.23E-03 | -0.31 |
| ILMN_2179726 | C16orf93  | 8.24E-03 | -0.27 |
| ILMN_2170813 | LAMP3     | 8.24E-03 | -0.42 |
| ILMN_1838319 | LOC730249 | 8.25E-03 | -0.26 |
| ILMN_1720373 | SLC7A5    | 8.27E-03 | 0.40  |
| ILMN_2111187 | ELOVL6    | 8.27E-03 | 0.24  |
| ILMN_1670124 | LOC150223 | 8.31E-03 | -0.22 |
| ILMN_1761464 | CD74      | 8.31E-03 | -0.51 |
| ILMN_3246060 | LOC654433 | 8.31E-03 | 0.38  |
| ILMN_2041293 | SQLE      | 8.31E-03 | 0.48  |
| ILMN_1768176 | CXorf26   | 8.32E-03 | 0.36  |
| ILMN_1743241 | ARL4A     | 8.33E-03 | 0.25  |
| ILMN_1771026 | GARS      | 8.41E-03 | 0.40  |
| ILMN_1719627 | SLC27A3   | 8.41E-03 | -0.35 |
| ILMN_2140999 | ZFYVE16   | 8.41E-03 | 0.34  |
| ILMN_1789240 | MLST8     | 8.47E-03 | 0.31  |
| ILMN_1806408 | ACADVL    | 8.48E-03 | -0.38 |
| ILMN_1801403 | DCUN1D4   | 8.54E-03 | 0.33  |
| ILMN_1669831 | C6orf192  | 8.54E-03 | 0.51  |
| ILMN_1670322 | FCHO2     | 8.54E-03 | 0.39  |
| ILMN_1723141 | OTUD1     | 8.54E-03 | 0.35  |
| ILMN_1651496 | HIST1H2BD | 8.55E-03 | -0.40 |
| ILMN_1655117 | WDR19     | 8.55E-03 | 0.32  |
| ILMN_1720829 | ZFP36     | 8.61E-03 | -0.40 |
| ILMN_1730622 | EVL       | 8.61E-03 | -0.43 |
| ILMN_1770338 | TM4SF1    | 8.63E-03 | 0.47  |
| ILMN_1657862 | AHCY      | 8.64E-03 | 0.32  |
| ILMN_1775170 | MT1X      | 8.66E-03 | -0.36 |
| ILMN_1667224 | SLAMF8    | 8.66E-03 | -0.41 |
| ILMN_2413808 | CD53      | 8.66E-03 | -0.33 |
| ILMN_3238196 | CYTH4     | 8.67E-03 | -0.43 |
| ILMN_2136971 | FABP3     | 8.71E-03 | 0.44  |
| ILMN_3251662 | HINT3     | 8.71E-03 | 0.52  |
| ILMN_1719695 | NFKBIZ    | 8.71E-03 | -0.30 |
| ILMN_1652198 | CCM2      | 8.76E-03 | -0.29 |
| ILMN_1673586 | SLC6A6    | 8.78E-03 | 0.30  |
| ILMN_1652280 | FBXO32    | 8.79E-03 | 0.29  |
| ILMN_1801254 | LOC648984 | 8.79E-03 | -0.52 |
| ILMN_1656196 | E2F6      | 8.79E-03 | 0.35  |
| ILMN_1729509 | C1orf43   | 8.80E-03 | 0.37  |
| ILMN_1704730 | CD93      | 8.82E-03 | -0.79 |
| ILMN_1709870 | HES2      | 8.82E-03 | 0.18  |
| ILMN_1811736 | ENTHD1    | 8.84E-03 | 0.26  |
| ILMN_3240222 | PRAGMIN   | 8.84E-03 | -0.39 |
| ILMN_1741200 | RFX5      | 8.87E-03 | -0.31 |
| ILMN_1772824 | WNT5B     | 8.88E-03 | -0.14 |

|              |           |          |       |
|--------------|-----------|----------|-------|
| ILMN_3242271 | GAPT      | 8.91E-03 | -0.60 |
| ILMN_1691339 | CLEC1A    | 8.93E-03 | -0.15 |
| ILMN_1681415 | SIGLEC7   | 8.97E-03 | -0.37 |
| ILMN_1765796 | ENO2      | 9.00E-03 | 0.34  |
| ILMN_2254962 | ACSS2     | 9.03E-03 | 0.21  |
| ILMN_1706094 | HECTD1    | 9.06E-03 | 0.38  |
| ILMN_2066020 | TCEB1     | 9.07E-03 | 0.38  |
| ILMN_3239959 | C17orf106 | 9.09E-03 | 0.17  |
| ILMN_1666665 | COL23A1   | 9.09E-03 | -0.25 |
| ILMN_1706344 | ABHD6     | 9.20E-03 | 0.35  |
| ILMN_1651964 | ABCC5     | 9.33E-03 | 0.37  |
| ILMN_1803256 | STOX2     | 9.33E-03 | 0.32  |
| ILMN_2171289 | SAMSN1    | 9.33E-03 | -0.39 |
| ILMN_1809931 | NDRG1     | 9.35E-03 | 0.43  |
| ILMN_2103362 | ARHGAP27  | 9.43E-03 | -0.19 |
| ILMN_1730229 | CGNL1     | 9.52E-03 | 0.66  |
| ILMN_1803997 | SDCCAG3   | 9.52E-03 | 0.49  |
| ILMN_1849494 |           | 9.57E-03 | 0.27  |
| ILMN_1731412 | UBTD2     | 9.57E-03 | 0.36  |
| ILMN_1746588 | TALDO1    | 9.57E-03 | 0.35  |
| ILMN_1720083 | EHD4      | 9.63E-03 | -0.47 |
| ILMN_1656818 | GPR141    | 9.63E-03 | -0.28 |
| ILMN_2197365 | RGS2      | 9.65E-03 | -0.66 |
| ILMN_2294976 | RNASE4    | 9.65E-03 | -0.33 |
| ILMN_1773006 | FABP4     | 9.65E-03 | -0.62 |
| ILMN_2336781 | SOD2      | 9.67E-03 | 0.43  |
| ILMN_1677092 | GEM       | 9.67E-03 | 0.34  |
| ILMN_2391051 | FCGR1B    | 9.71E-03 | -0.37 |
| ILMN_1756355 | NDUFS3    | 9.76E-03 | 0.34  |
| ILMN_2170814 | LAMP3     | 9.79E-03 | -0.55 |
| ILMN_1791328 | STK39     | 9.85E-03 | -0.41 |
| ILMN_1680738 | C5orf13   | 9.88E-03 | 0.28  |
| ILMN_2338038 | AK3L1     | 9.88E-03 | 0.32  |
| ILMN_1763837 | ANPEP     | 9.89E-03 | -0.44 |
| ILMN_1802780 | M160      | 9.89E-03 | -0.32 |
| ILMN_1730639 | SLC22A15  | 9.97E-03 | 0.33  |

#### Methylprednisolone (MP)

| ProbeID      | Gene Symbol | FDR      | Log <sub>2</sub> [MP/NoTx] |
|--------------|-------------|----------|----------------------------|
| ILMN_1778444 | FKBP5       | 6.82E-11 | 3.15                       |
| ILMN_2376403 | TSC22D3     | 7.56E-10 | 2.95                       |
| ILMN_1756071 | MFGE8       | 7.56E-10 | 3.82                       |
| ILMN_1748124 | TSC22D3     | 1.17E-09 | 2.65                       |
| ILMN_1688580 | CAMP        | 1.30E-09 | 3.66                       |

|              |           |          |       |
|--------------|-----------|----------|-------|
| ILMN_1751975 | ALOX15B   | 1.30E-09 | 2.09  |
| ILMN_1772131 | IL1R2     | 2.83E-09 | 4.20  |
| ILMN_1707124 | TFPI      | 3.02E-09 | 1.98  |
| ILMN_1656940 | ABLIM3    | 3.49E-09 | 1.26  |
| ILMN_2393149 | ALOX15B   | 3.49E-09 | 2.41  |
| ILMN_2305407 | ZBTB16    | 3.49E-09 | 1.69  |
| ILMN_1758457 | TBC1D16   | 5.54E-09 | 2.30  |
| ILMN_1701032 | TFPI      | 5.65E-09 | 1.32  |
| ILMN_2329914 | SPRY1     | 5.65E-09 | 2.55  |
| ILMN_1800626 | SESN1     | 5.65E-09 | 1.64  |
| ILMN_1662619 | TFPI      | 6.28E-09 | 2.01  |
| ILMN_1700896 | SAP30     | 8.01E-09 | 2.16  |
| ILMN_2223941 | FBLN5     | 8.14E-09 | 2.42  |
| ILMN_2234697 | BEX1      | 8.15E-09 | -2.71 |
| ILMN_2072178 | ECHDC3    | 1.04E-08 | 2.06  |
| ILMN_1719986 | PIK3IP1   | 2.32E-08 | 2.01  |
| ILMN_1709486 | SRPX      | 2.32E-08 | 2.94  |
| ILMN_1739942 | FAM117B   | 2.53E-08 | 1.37  |
| ILMN_1811933 | SHMT1     | 3.24E-08 | 1.56  |
| ILMN_1691860 | SPRY1     | 3.80E-08 | 1.83  |
| ILMN_2402817 | ZBTB16    | 4.42E-08 | 0.95  |
| ILMN_1740015 | CD14      | 4.42E-08 | -1.66 |
| ILMN_1730710 | ADORA3    | 6.24E-08 | 1.86  |
| ILMN_1661695 | IRAK3     | 8.49E-08 | 1.54  |
| ILMN_1676980 | MTSS1     | 8.84E-08 | 1.32  |
| ILMN_2328666 | CD83      | 1.02E-07 | -1.54 |
| ILMN_2073289 | MTSS1     | 1.17E-07 | 1.75  |
| ILMN_1796409 | C1QB      | 1.17E-07 | 1.85  |
| ILMN_1770768 | SLAMF1    | 1.33E-07 | 1.80  |
| ILMN_1779677 | ZCCHC6    | 1.38E-07 | 1.26  |
| ILMN_2276952 | TSC22D3   | 1.38E-07 | 1.91  |
| ILMN_1781285 | DUSP1     | 1.49E-07 | 1.96  |
| ILMN_1651610 | LOC730525 | 1.80E-07 | 2.18  |
| ILMN_2092118 | FPR1      | 1.80E-07 | 1.89  |
| ILMN_1780582 | CD83      | 2.23E-07 | -1.59 |
| ILMN_1771688 | RAB7B     | 2.54E-07 | -1.15 |
| ILMN_1747355 | CCL3L1    | 2.92E-07 | -1.63 |
| ILMN_1774874 | IL1RN     | 3.03E-07 | -1.74 |
| ILMN_1913678 |           | 3.05E-07 | 1.38  |
| ILMN_1666733 | IL8       | 3.08E-07 | -2.47 |
| ILMN_2184373 | IL8       | 3.35E-07 | -2.28 |
| ILMN_1651950 | TPST1     | 3.52E-07 | 1.72  |
| ILMN_1738578 | FILIP1L   | 3.77E-07 | 1.01  |
| ILMN_1664176 | FBLN5     | 3.77E-07 | 1.86  |
| ILMN_2121408 | HBEGF     | 3.77E-07 | -1.22 |
| ILMN_1781700 | IL18R1    | 4.75E-07 | 1.60  |

|              |           |          |       |
|--------------|-----------|----------|-------|
| ILMN_2294976 | RNASE4    | 4.96E-07 | 1.24  |
| ILMN_1686562 | KIF13B    | 5.30E-07 | 1.11  |
| ILMN_2157099 | CCNA1     | 5.68E-07 | 1.72  |
| ILMN_1915076 |           | 5.68E-07 | 1.16  |
| ILMN_2399363 | CLEC4A    | 6.11E-07 | -1.22 |
| ILMN_1671509 | CCL3      | 6.11E-07 | -1.93 |
| ILMN_1711608 | SSBP2     | 6.30E-07 | 1.08  |
| ILMN_1709484 | BLM       | 7.53E-07 | 1.09  |
| ILMN_1752668 | DAAM2     | 7.53E-07 | 1.30  |
| ILMN_1720998 | CA12      | 7.53E-07 | 1.94  |
| ILMN_1801303 | AMY2A     | 8.00E-07 | 1.08  |
| ILMN_1692535 | DPP4      | 8.00E-07 | 1.15  |
| ILMN_2053415 | LDLR      | 8.00E-07 | -1.19 |
| ILMN_1730906 | FILIP1L   | 8.00E-07 | 1.14  |
| ILMN_2276904 | ALOX15B   | 8.00E-07 | 0.95  |
| ILMN_1764723 | SH3PXD2B  | 8.00E-07 | 1.03  |
| ILMN_1723004 | CD72      | 8.00E-07 | 1.25  |
| ILMN_1754865 | LOC400455 | 8.31E-07 | 1.33  |
| ILMN_1733270 | CD163     | 8.86E-07 | 1.95  |
| ILMN_1790689 | CRISPLD2  | 9.06E-07 | 1.35  |
| ILMN_2304512 | SAA1      | 9.06E-07 | 1.44  |
| ILMN_1856480 |           | 9.06E-07 | 1.22  |
| ILMN_2373982 | PICK1     | 9.64E-07 | 1.09  |
| ILMN_1681437 | DCXR      | 1.02E-06 | 1.19  |
| ILMN_1738552 | SLC1A3    | 1.06E-06 | 1.50  |
| ILMN_1739605 | LYPD3     | 1.07E-06 | 0.66  |
| ILMN_2105573 | CCL3L3    | 1.08E-06 | -1.78 |
| ILMN_2348487 | EMR3      | 1.13E-06 | -1.12 |
| ILMN_1760727 | ANG       | 1.23E-06 | 1.11  |
| ILMN_1842850 |           | 1.40E-06 | 0.85  |
| ILMN_2083469 | IRS2      | 1.44E-06 | 1.36  |
| ILMN_1785345 | GPR84     | 1.47E-06 | -1.25 |
| ILMN_1707077 | SORT1     | 1.48E-06 | 1.31  |
| ILMN_3200211 | LOC643680 | 1.68E-06 | 1.35  |
| ILMN_1710923 | SLAMF7    | 1.69E-06 | -0.96 |
| ILMN_2391150 | FILIP1L   | 1.74E-06 | 0.92  |
| ILMN_1684982 | PDK4      | 1.78E-06 | 2.86  |
| ILMN_1696974 | ANG       | 1.78E-06 | 1.07  |
| ILMN_1664170 | CUGBP2    | 1.91E-06 | 0.63  |
| ILMN_1738095 | PER2      | 2.01E-06 | -1.11 |
| ILMN_1656285 | METTL7A   | 2.30E-06 | 1.31  |
| ILMN_1808999 | ARHGEF19  | 2.60E-06 | 0.78  |
| ILMN_2074748 | HAL       | 2.82E-06 | 0.53  |
| ILMN_2379599 | CD163     | 2.88E-06 | 1.74  |
| ILMN_1676563 | HTRA1     | 3.21E-06 | 1.27  |
| ILMN_1776602 | RNASE4    | 3.21E-06 | 1.12  |

|              |           |          |       |
|--------------|-----------|----------|-------|
| ILMN_1776905 | FAM23B    | 3.21E-06 | 0.66  |
| ILMN_2374865 | ATF3      | 3.21E-06 | -1.58 |
| ILMN_1743367 | FZD4      | 3.34E-06 | 1.43  |
| ILMN_1740572 | TCN2      | 3.38E-06 | 0.84  |
| ILMN_1722622 | CD163     | 3.40E-06 | 1.82  |
| ILMN_1657871 | RSAD2     | 3.65E-06 | -1.30 |
| ILMN_1663042 | SDC4      | 3.94E-06 | 1.06  |
| ILMN_1805410 | C15orf48  | 3.96E-06 | -0.97 |
| ILMN_1669523 | FOS       | 4.03E-06 | 1.31  |
| ILMN_1672834 | SSH2      | 4.09E-06 | 0.94  |
| ILMN_1684368 | C5orf62   | 4.09E-06 | 1.12  |
| ILMN_1778523 | KLF9      | 4.09E-06 | 1.19  |
| ILMN_1707339 | BTG3      | 4.32E-06 | -0.86 |
| ILMN_1800638 | CUGBP2    | 5.15E-06 | 0.82  |
| ILMN_1730454 | FOLR3     | 5.22E-06 | -0.93 |
| ILMN_1716797 | CD302     | 5.26E-06 | 1.07  |
| ILMN_1692466 | LOC728637 | 5.28E-06 | -0.57 |
| ILMN_3244607 | FAM117B   | 5.28E-06 | 0.72  |
| ILMN_1782050 | CEBPD     | 5.65E-06 | 1.13  |
| ILMN_1811765 | ADAMTS2   | 5.71E-06 | 0.46  |
| ILMN_1797875 | ALOX5AP   | 6.02E-06 | 1.22  |
| ILMN_1736829 | MDM2      | 6.15E-06 | 0.57  |
| ILMN_1669409 | VSIG4     | 6.17E-06 | 1.11  |
| ILMN_1762713 | C19orf59  | 6.24E-06 | 1.09  |
| ILMN_1711062 | MMP19     | 6.54E-06 | 0.69  |
| ILMN_1709204 | CLEC4A    | 6.78E-06 | -1.17 |
| ILMN_1741712 | MS4A4A    | 7.07E-06 | 0.83  |
| ILMN_2148913 | TMEM45A   | 7.10E-06 | 0.70  |
| ILMN_1810584 | IL1R1     | 7.20E-06 | 0.77  |
| ILMN_1781416 | FRAT1     | 7.27E-06 | 0.76  |
| ILMN_1769299 | MTMR11    | 7.61E-06 | 1.64  |
| ILMN_1780465 | CLEC5A    | 7.98E-06 | -0.93 |
| ILMN_1728106 | TNF       | 8.04E-06 | -0.62 |
| ILMN_2337941 | COPS8     | 8.58E-06 | 1.03  |
| ILMN_3227023 | SNHG7     | 9.34E-06 | 1.06  |
| ILMN_2064725 | METTL7B   | 9.36E-06 | 1.13  |
| ILMN_1808395 | ACAP1     | 9.48E-06 | 0.76  |
| ILMN_2339835 | PTGS1     | 9.48E-06 | -1.02 |
| ILMN_2408572 | RNASE4    | 9.85E-06 | 1.00  |
| ILMN_1664761 | TMEM138   | 9.85E-06 | -0.99 |
| ILMN_2073157 | AMY2B     | 9.94E-06 | 0.63  |
| ILMN_1766914 | MFAP4     | 1.01E-05 | 0.44  |
| ILMN_1781996 | NUDT16    | 1.09E-05 | 1.19  |
| ILMN_1681252 | C17orf44  | 1.15E-05 | 0.62  |
| ILMN_1651769 | ZFYVE16   | 1.15E-05 | -0.61 |
| ILMN_3246054 | LOC732415 | 1.15E-05 | 0.94  |

|              |            |          |       |
|--------------|------------|----------|-------|
| ILMN_1771376 | PEA15      | 1.15E-05 | -0.79 |
| ILMN_2081682 | SMAP2      | 1.21E-05 | 0.87  |
| ILMN_1758371 | IL1R2      | 1.25E-05 | 1.25  |
| ILMN_1793474 | INSIG1     | 1.25E-05 | -0.95 |
| ILMN_2415421 | SLC30A2    | 1.25E-05 | 0.61  |
| ILMN_1770610 | MERTK      | 1.26E-05 | 0.92  |
| ILMN_2294978 | RNASE4     | 1.26E-05 | 1.12  |
| ILMN_1778010 | IL32       | 1.26E-05 | 0.80  |
| ILMN_2370336 | MS4A4A     | 1.27E-05 | 0.91  |
| ILMN_2368530 | IL32       | 1.34E-05 | 1.25  |
| ILMN_3234142 | LOC728855  | 1.38E-05 | 0.98  |
| ILMN_1730575 | GCLC       | 1.43E-05 | 0.85  |
| ILMN_1682312 | CYBB       | 1.43E-05 | -1.18 |
| ILMN_1744381 | SERPINE1   | 1.55E-05 | 0.86  |
| ILMN_1720282 | NQO1       | 1.56E-05 | -1.10 |
| ILMN_1733680 | AZI2       | 1.56E-05 | 0.76  |
| ILMN_2386973 | PKP2       | 1.57E-05 | 1.14  |
| ILMN_1717326 | SLC29A3    | 1.76E-05 | -0.83 |
| ILMN_1781468 | SMAP2      | 1.81E-05 | 0.85  |
| ILMN_1775405 | ARL4A      | 1.92E-05 | 1.83  |
| ILMN_1664068 | ERGIC1     | 1.97E-05 | 1.12  |
| ILMN_1689329 | SCD        | 2.10E-05 | -1.02 |
| ILMN_1717313 | NFKBIE     | 2.16E-05 | -0.84 |
| ILMN_2054297 | PTGS2      | 2.16E-05 | -0.78 |
| ILMN_1659352 | KCNK13     | 2.26E-05 | -0.71 |
| ILMN_2352303 | RASSF2     | 2.26E-05 | 0.82  |
| ILMN_1768181 | TOR3A      | 2.40E-05 | -0.76 |
| ILMN_1720048 | CCL2       | 2.40E-05 | -2.20 |
| ILMN_1656501 | DUSP5      | 2.40E-05 | -0.96 |
| ILMN_2154836 | BTG3       | 2.40E-05 | -0.58 |
| ILMN_2047618 | KCNE1      | 2.41E-05 | 0.74  |
| ILMN_2129505 | CYBASC3    | 2.46E-05 | -0.93 |
| ILMN_1674034 | H2AFY      | 2.49E-05 | 0.77  |
| ILMN_1794875 | AGPAT9     | 2.49E-05 | -1.14 |
| ILMN_1733259 | ADORA3     | 2.61E-05 | 1.84  |
| ILMN_1700695 | SLC44A1    | 2.65E-05 | 0.91  |
| ILMN_1742382 | RIMS3      | 2.66E-05 | 0.82  |
| ILMN_2294762 | AMY1A      | 2.81E-05 | -0.83 |
| ILMN_1785902 | C1QC       | 2.83E-05 | 1.01  |
| ILMN_2055523 | CSGALNACT1 | 2.86E-05 | 0.24  |
| ILMN_1669617 | GRB10      | 2.90E-05 | 0.69  |
| ILMN_1735495 | TBC1D8     | 2.90E-05 | 0.83  |
| ILMN_1679322 | SH2D4A     | 3.04E-05 | 0.48  |
| ILMN_1656904 | SLC1A4     | 3.12E-05 | -0.74 |
| ILMN_1752526 | RNF144B    | 3.12E-05 | 0.87  |
| ILMN_1718977 | GADD45B    | 3.12E-05 | 0.98  |

|              |           |          |       |
|--------------|-----------|----------|-------|
| ILMN_3241378 | LOC728448 | 3.12E-05 | 0.91  |
| ILMN_3238435 | SNORA12   | 3.15E-05 | 0.58  |
| ILMN_1707312 | NFIL3     | 3.20E-05 | 1.09  |
| ILMN_1702501 | RPS6KA2   | 3.30E-05 | 0.87  |
| ILMN_1782938 | SLC16A10  | 3.30E-05 | 1.00  |
| ILMN_2366391 | PRDX1     | 3.30E-05 | -0.65 |
| ILMN_1736527 | TFCP2L1   | 3.30E-05 | 0.87  |
| ILMN_1700967 | C3orf59   | 3.30E-05 | -0.67 |
| ILMN_1655311 | LOC145853 | 3.30E-05 | 0.52  |
| ILMN_1795963 | OKL38     | 3.37E-05 | -0.81 |
| ILMN_2291954 | SLA       | 3.40E-05 | 0.84  |
| ILMN_1755504 | CALCOCO2  | 3.41E-05 | 0.58  |
| ILMN_1654696 | C15orf48  | 3.44E-05 | -1.13 |
| ILMN_1714433 | MARCKSL1  | 3.55E-05 | -0.83 |
| ILMN_1785852 | OBFC2A    | 3.65E-05 | -0.81 |
| ILMN_1685176 | SGMS2     | 3.71E-05 | 0.37  |
| ILMN_1679093 | ZNF581    | 3.71E-05 | 0.70  |
| ILMN_1743241 | ARL4A     | 3.80E-05 | 0.96  |
| ILMN_1780334 | KCNJ2     | 3.80E-05 | 0.84  |
| ILMN_1780898 | PRKCH     | 3.80E-05 | 0.82  |
| ILMN_2073202 | MEI1      | 4.11E-05 | -0.43 |
| ILMN_1685834 | AMPH      | 4.25E-05 | 0.48  |
| ILMN_1780546 | OSM       | 4.32E-05 | -1.20 |
| ILMN_1743199 | EGR2      | 4.32E-05 | -1.14 |
| ILMN_1801313 | SIAH2     | 4.36E-05 | 0.99  |
| ILMN_1678170 | MME       | 4.36E-05 | 0.58  |
| ILMN_1675130 | NFIC      | 4.36E-05 | 0.59  |
| ILMN_2352953 | CPM       | 4.38E-05 | 0.76  |
| ILMN_1765641 | SEMA3A    | 4.73E-05 | -0.39 |
| ILMN_2309245 | BIN1      | 4.78E-05 | 1.00  |
| ILMN_2382942 | CA12      | 4.81E-05 | 0.71  |
| ILMN_1705750 | TGM2      | 4.84E-05 | -0.88 |
| ILMN_1741404 | MSC       | 4.87E-05 | -0.80 |
| ILMN_1666553 | SLC25A19  | 4.93E-05 | -0.75 |
| ILMN_1673795 | HSD17B4   | 4.97E-05 | 0.77  |
| ILMN_1742167 | TUBA1C    | 5.42E-05 | -1.02 |
| ILMN_1835017 |           | 5.64E-05 | 0.52  |
| ILMN_1701134 | PTEN      | 5.78E-05 | 0.89  |
| ILMN_1682993 | NKG7      | 5.78E-05 | 0.91  |
| ILMN_2137789 | KLF4      | 5.90E-05 | 0.68  |
| ILMN_1791147 | YPEL3     | 5.90E-05 | 0.69  |
| ILMN_1808732 | SAA1      | 5.90E-05 | 0.39  |
| ILMN_1697448 | TXNIP     | 6.02E-05 | 0.88  |
| ILMN_2174574 | HNRNPA3P1 | 6.11E-05 | -0.50 |
| ILMN_1715131 | CCR7      | 6.17E-05 | -1.15 |
| ILMN_1683059 | SIRT5     | 6.24E-05 | 0.72  |

|              |           |          |       |
|--------------|-----------|----------|-------|
| ILMN_2195236 | PGRMC2    | 6.26E-05 | 0.79  |
| ILMN_1761281 | LOC441019 | 6.26E-05 | 0.95  |
| ILMN_1729801 | S100A8    | 6.37E-05 | -0.81 |
| ILMN_2142979 | PTBP2     | 6.46E-05 | 0.42  |
| ILMN_1727402 | HCLS1     | 6.58E-05 | 0.67  |
| ILMN_1774547 | MPRIP     | 6.62E-05 | 0.73  |
| ILMN_1795285 | PHF15     | 6.74E-05 | 0.72  |
| ILMN_1684585 | ACSL1     | 6.91E-05 | 0.85  |
| ILMN_1796712 | S100A10   | 6.91E-05 | 0.65  |
| ILMN_1703016 | CACNA1G   | 6.94E-05 | 0.34  |
| ILMN_1735548 | HIVEP1    | 6.94E-05 | -0.46 |
| ILMN_1671142 | GPR68     | 6.94E-05 | -0.66 |
| ILMN_1655549 | SIGLEC10  | 6.94E-05 | 1.02  |
| ILMN_1773553 | FLJ46906  | 6.94E-05 | 0.64  |
| ILMN_1702787 | SEMA4A    | 6.94E-05 | -0.95 |
| ILMN_2345353 | LST1      | 7.06E-05 | -0.81 |
| ILMN_2379788 | HIF1A     | 7.06E-05 | -0.76 |
| ILMN_1775703 | TRAPPC6A  | 7.08E-05 | 0.69  |
| ILMN_1708934 | ADM       | 7.08E-05 | 0.70  |
| ILMN_1742981 | TUBA1A    | 7.08E-05 | -1.20 |
| ILMN_1804822 | SRXN1     | 7.14E-05 | -0.64 |
| ILMN_1746465 | FJX1      | 7.14E-05 | 0.41  |
| ILMN_1757343 | PABPC4    | 7.14E-05 | 0.62  |
| ILMN_1808047 | PHC2      | 7.37E-05 | 0.81  |
| ILMN_1682099 | TNFAIP8L3 | 7.47E-05 | 0.69  |
| ILMN_1792455 | TMEM158   | 7.47E-05 | -0.94 |
| ILMN_2148819 | TUBA1A    | 7.67E-05 | -0.88 |
| ILMN_2094261 | AMY1B     | 7.70E-05 | 0.29  |
| ILMN_1787186 | NOV       | 7.73E-05 | 0.50  |
| ILMN_1694882 | AMY2B     | 7.73E-05 | 0.47  |
| ILMN_1737918 | C1QA      | 7.73E-05 | 0.72  |
| ILMN_1743784 | SHMT1     | 8.26E-05 | 0.36  |
| ILMN_1704571 | FAM53B    | 8.26E-05 | 0.68  |
| ILMN_1800787 | RFTN1     | 8.26E-05 | -0.85 |
| ILMN_1656057 | PLAU      | 8.44E-05 | -1.25 |
| ILMN_1736180 | FRAT1     | 8.66E-05 | 0.41  |
| ILMN_1774206 | LOC647108 | 8.81E-05 | 0.93  |
| ILMN_1663313 | AMY1C     | 8.97E-05 | -0.75 |
| ILMN_1694240 | MAP2K1    | 9.06E-05 | 0.90  |
| ILMN_2255133 | BCL11A    | 9.12E-05 | -0.71 |
| ILMN_1674160 | BIN1      | 9.17E-05 | 1.06  |
| ILMN_1781761 | ENPP4     | 9.18E-05 | 1.03  |
| ILMN_2235851 | LINCR     | 9.50E-05 | -0.54 |
| ILMN_2138589 | MERTK     | 9.53E-05 | 0.87  |
| ILMN_1814998 | FKSG30    | 9.57E-05 | -0.71 |
| ILMN_1782953 | MMP19     | 9.69E-05 | 0.62  |



|              |           |          |       |
|--------------|-----------|----------|-------|
| ILMN_1769388 | GJB2      | 1.00E-04 | -0.93 |
| ILMN_1806908 | PRKCB1    | 1.01E-04 | -0.63 |
| ILMN_1670302 | HK3       | 1.01E-04 | -0.74 |
| ILMN_1736911 | TMOD1     | 1.04E-04 | 0.40  |
| ILMN_2061043 | CD48      | 1.05E-04 | -0.65 |
| ILMN_1714082 | CMAS      | 1.05E-04 | 0.75  |
| ILMN_1704961 | ACTG1     | 1.05E-04 | -0.74 |
| ILMN_1665100 | PTGS1     | 1.07E-04 | -0.30 |
| ILMN_1740685 | LOC652541 | 1.07E-04 | 0.43  |
| ILMN_1768505 | IL13RA1   | 1.11E-04 | 0.74  |
| ILMN_2366388 | PRDX1     | 1.15E-04 | -0.66 |
| ILMN_1671969 | UGP2      | 1.16E-04 | 0.95  |
| ILMN_1679262 | DPYSL3    | 1.16E-04 | 0.64  |
| ILMN_2340919 | GRB10     | 1.16E-04 | 0.32  |
| ILMN_1707240 | PTBP2     | 1.17E-04 | 0.44  |
| ILMN_1773154 | NFKBIA    | 1.17E-04 | 0.71  |
| ILMN_1746578 | SLC23A2   | 1.17E-04 | -0.53 |
| ILMN_1672662 | SLC20A1   | 1.17E-04 | 1.06  |
| ILMN_1706511 | TEF       | 1.17E-04 | -0.43 |
| ILMN_2152131 | ACTB      | 1.18E-04 | -0.50 |
| ILMN_1790228 | FURIN     | 1.22E-04 | 0.60  |
| ILMN_2065690 | GRAMD3    | 1.22E-04 | 0.71  |
| ILMN_2150402 | TMEM64    | 1.25E-04 | 0.36  |
| ILMN_1682717 | IER3      | 1.25E-04 | -0.93 |
| ILMN_1729112 | CHPT1     | 1.29E-04 | 0.66  |
| ILMN_1758673 | SLC44A1   | 1.29E-04 | 0.83  |
| ILMN_1723035 | OLR1      | 1.30E-04 | -1.12 |
| ILMN_1689734 | IL1RN     | 1.30E-04 | -1.61 |
| ILMN_2412294 | GNB5      | 1.32E-04 | 0.45  |
| ILMN_1703074 | CPD       | 1.37E-04 | 0.97  |
| ILMN_1779648 | HIST3H2A  | 1.38E-04 | 0.99  |
| ILMN_1695590 | ADRB2     | 1.38E-04 | 0.56  |
| ILMN_2275742 | DNASE2B   | 1.38E-04 | 1.24  |
| ILMN_1725510 | DHCR24    | 1.38E-04 | 0.71  |
| ILMN_1814194 | TCF4      | 1.40E-04 | -0.57 |
| ILMN_1752075 | MYBPC1    | 1.41E-04 | 0.23  |
| ILMN_1789130 | DNASE2B   | 1.41E-04 | 1.16  |
| ILMN_1713124 | AKR1C3    | 1.41E-04 | 1.32  |
| ILMN_3236556 | UBXN2B    | 1.44E-04 | 0.67  |
| ILMN_1654516 | TMEM120A  | 1.44E-04 | 0.74  |
| ILMN_1763461 | ALDH7A1   | 1.45E-04 | 0.68  |
| ILMN_1677200 | CYFIP2    | 1.46E-04 | 0.53  |
| ILMN_2374340 | PLAUR     | 1.50E-04 | -0.71 |
| ILMN_1776516 | ITPKA     | 1.53E-04 | 0.37  |
| ILMN_1798204 | IL21R     | 1.54E-04 | -0.64 |
| ILMN_1653871 | NAMPT     | 1.54E-04 | -0.57 |

|              |            |          |       |
|--------------|------------|----------|-------|
| ILMN_1791647 | ASIP       | 1.59E-04 | 0.67  |
| ILMN_2141482 | SERPINF1   | 1.59E-04 | 0.55  |
| ILMN_3216794 | LOC644860  | 1.62E-04 | 0.34  |
| ILMN_1655612 | ARRDC2     | 1.68E-04 | 0.55  |
| ILMN_1717056 | TXNRD1     | 1.68E-04 | -0.83 |
| ILMN_1694075 | GADD45A    | 1.75E-04 | 0.60  |
| ILMN_1688480 | CCND1      | 1.76E-04 | -1.24 |
| ILMN_1795762 | PLEK       | 1.77E-04 | -0.59 |
| ILMN_2199439 | CA2        | 1.78E-04 | -0.55 |
| ILMN_1742187 | MAN1A1     | 1.78E-04 | 0.58  |
| ILMN_1702320 | JAKMIP2    | 1.87E-04 | -0.52 |
| ILMN_1669376 | DRAM1      | 1.87E-04 | -0.83 |
| ILMN_2166457 | HPGD       | 1.87E-04 | 0.56  |
| ILMN_3241758 | POTEF      | 1.89E-04 | -0.77 |
| ILMN_1721116 | USP10      | 1.91E-04 | 0.72  |
| ILMN_2301722 | PDE8B      | 1.92E-04 | 0.21  |
| ILMN_1668063 | FCN1       | 1.97E-04 | -1.05 |
| ILMN_1686109 | CCL23      | 1.98E-04 | -0.94 |
| ILMN_1800261 | TUBA1B     | 1.98E-04 | -0.90 |
| ILMN_1711888 | COBL       | 2.01E-04 | 1.04  |
| ILMN_1653496 | GLUL       | 2.01E-04 | 0.53  |
| ILMN_1672807 | CA5B       | 2.02E-04 | 0.28  |
| ILMN_3247728 | RNF115     | 2.05E-04 | 0.62  |
| ILMN_2200917 | SLC4A7     | 2.05E-04 | -0.72 |
| ILMN_1729987 | SRC        | 2.06E-04 | -0.55 |
| ILMN_1799208 | CSGALNACT2 | 2.08E-04 | 0.56  |
| ILMN_1727532 | OLFML3     | 2.12E-04 | 0.74  |
| ILMN_1763260 | HIF1A      | 2.13E-04 | -0.80 |
| ILMN_2312194 | CYB5A      | 2.13E-04 | 0.69  |
| ILMN_1667043 | EIF4A3     | 2.13E-04 | 0.75  |
| ILMN_1654112 | PARD6A     | 2.14E-04 | 0.51  |
| ILMN_1795930 | PTGER4     | 2.18E-04 | -0.89 |
| ILMN_2038777 | ACTB       | 2.18E-04 | -0.66 |
| ILMN_1798957 | C12orf47   | 2.23E-04 | 0.76  |
| ILMN_2337655 | WARS       | 2.23E-04 | -0.81 |
| ILMN_1801833 | ARHGAP24   | 2.29E-04 | 0.47  |
| ILMN_1777519 | ITGB7      | 2.32E-04 | -0.59 |
| ILMN_1715927 | VSTM2L     | 2.32E-04 | 0.26  |
| ILMN_1774733 | SOCS1      | 2.33E-04 | 0.34  |
| ILMN_3247506 | FCGR1C     | 2.33E-04 | -0.59 |
| ILMN_2324421 | TXNRD1     | 2.35E-04 | -0.77 |
| ILMN_1676480 | LOC654053  | 2.50E-04 | -0.37 |
| ILMN_1663866 | TGFBI      | 2.51E-04 | -0.67 |
| ILMN_1731433 | ABP1       | 2.52E-04 | -0.51 |
| ILMN_1704369 | LIMA1      | 2.52E-04 | -0.59 |
| ILMN_1662795 | CA2        | 2.53E-04 | -0.70 |

|              |          |          |       |
|--------------|----------|----------|-------|
| ILMN_2383611 | PTPRE    | 2.58E-04 | -0.69 |
| ILMN_2099277 | HTRA4    | 2.70E-04 | -0.95 |
| ILMN_1734543 | PTPRE    | 2.74E-04 | -0.68 |
| ILMN_2345142 | SULF2    | 2.75E-04 | -0.49 |
| ILMN_1811997 | ZNF364   | 2.76E-04 | 0.68  |
| ILMN_1722981 | TLR5     | 2.78E-04 | 0.70  |
| ILMN_1708303 | CYP4F22  | 2.78E-04 | 0.30  |
| ILMN_1795183 | RNASE1   | 2.81E-04 | 0.80  |
| ILMN_1654612 | ZNF589   | 2.85E-04 | 0.49  |
| ILMN_1682176 | CLEC3B   | 2.86E-04 | 0.43  |
| ILMN_1681283 | HIF1A    | 2.86E-04 | -0.74 |
| ILMN_1813379 | TNFRSF9  | 2.87E-04 | -0.37 |
| ILMN_2140999 | ZFYVE16  | 2.89E-04 | -0.47 |
| ILMN_1720158 | ETS2     | 2.89E-04 | 1.07  |
| ILMN_2243308 | ACVR1B   | 2.89E-04 | 0.61  |
| ILMN_1687508 | ALDH7A1  | 2.90E-04 | 0.60  |
| ILMN_1808707 | FSCN1    | 2.94E-04 | -0.85 |
| ILMN_1750062 | PPARGC1A | 2.94E-04 | 0.33  |
| ILMN_2153332 | ATXN1    | 2.95E-04 | -0.48 |
| ILMN_2373779 | COPS8    | 2.95E-04 | 0.83  |
| ILMN_1714759 | CNIH4    | 2.98E-04 | 0.75  |
| ILMN_1778377 | ERGIC1   | 2.98E-04 | 0.56  |
| ILMN_2367070 | ACOT9    | 2.98E-04 | -0.63 |
| ILMN_1810725 | FAM129A  | 3.00E-04 | -0.60 |
| ILMN_1809467 | VAMP5    | 3.00E-04 | 0.57  |
| ILMN_1731736 | RIN3     | 3.00E-04 | 0.36  |
| ILMN_1786444 | LPL      | 3.02E-04 | 0.89  |
| ILMN_1811258 | RELB     | 3.04E-04 | -0.37 |
| ILMN_2046730 | S100A10  | 3.07E-04 | 0.53  |
| ILMN_1683313 | ST3GAL1  | 3.07E-04 | -0.65 |
| ILMN_1880406 |          | 3.10E-04 | 0.68  |
| ILMN_1655229 | SLC7A11  | 3.10E-04 | -0.58 |
| ILMN_1758049 | NFIA     | 3.11E-04 | 0.34  |
| ILMN_1794677 | TMC6     | 3.21E-04 | -0.63 |
| ILMN_1735910 | VMO1     | 3.31E-04 | -0.69 |
| ILMN_1658995 | ACOT9    | 3.32E-04 | -0.59 |
| ILMN_1659960 | IL4I1    | 3.37E-04 | -0.80 |
| ILMN_2396444 | CD14     | 3.37E-04 | -0.61 |
| ILMN_1654268 | HMGB2    | 3.42E-04 | 0.71  |
| ILMN_1777296 | ACTB     | 3.42E-04 | -0.68 |
| ILMN_1746517 | KYNU     | 3.54E-04 | -0.61 |
| ILMN_1775501 | IL1B     | 3.58E-04 | -0.80 |
| ILMN_2053178 | ACTG1    | 3.64E-04 | -0.51 |
| ILMN_1785170 | ARMCX2   | 3.64E-04 | 0.51  |
| ILMN_2405185 | AOC2     | 3.68E-04 | 0.39  |
| ILMN_1693233 | KIAA0513 | 3.68E-04 | 0.92  |

|              |              |          |       |
|--------------|--------------|----------|-------|
| ILMN_1850238 |              | 3.68E-04 | 0.65  |
| ILMN_1727271 | WARS         | 3.75E-04 | -0.81 |
| ILMN_2094262 | AMY1B        | 3.75E-04 | 0.27  |
| ILMN_1785060 | TSPAN14      | 3.89E-04 | 0.50  |
| ILMN_1756685 | DEPDC6       | 3.92E-04 | 0.41  |
| ILMN_2129563 | LDLRAD3      | 3.95E-04 | 0.31  |
| ILMN_1781356 | TSC22D3      | 3.96E-04 | 0.26  |
| ILMN_2125374 | CMAS         | 3.96E-04 | 0.67  |
| ILMN_1746888 | PCOLCE2      | 3.96E-04 | 0.89  |
| ILMN_1765701 | LOC399942    | 4.04E-04 | -0.73 |
| ILMN_1711838 | SLC25A24     | 4.16E-04 | -0.78 |
| ILMN_2202637 | CRY1         | 4.16E-04 | -0.39 |
| ILMN_1733956 | IARS         | 4.17E-04 | 1.61  |
| ILMN_1708159 | PRKCABP      | 4.17E-04 | 0.38  |
| ILMN_1688373 | LST1         | 4.18E-04 | -0.81 |
| ILMN_1767349 | ABCB4        | 4.20E-04 | -0.28 |
| ILMN_2367239 | RCAN1        | 4.20E-04 | 1.05  |
| ILMN_2218856 | CCL3L1       | 4.22E-04 | -1.23 |
| ILMN_2170949 | SNX10        | 4.26E-04 | 0.63  |
| ILMN_3273456 | LOC100129342 | 4.33E-04 | 0.20  |
| ILMN_1763638 | BCAR3        | 4.42E-04 | -0.59 |
| ILMN_1758672 | FAM107B      | 4.42E-04 | -0.82 |
| ILMN_1771019 | MTMR4        | 4.42E-04 | 0.62  |
| ILMN_2322935 | MAPKAPK5     | 4.46E-04 | 0.61  |
| ILMN_1662362 | LGR6         | 4.46E-04 | 0.40  |
| ILMN_1782086 | AOC3         | 4.51E-04 | 0.24  |
| ILMN_1685625 | UCP2         | 4.54E-04 | -0.56 |
| ILMN_1701621 | SCO2         | 4.57E-04 | -0.60 |
| ILMN_1752755 | VWF          | 4.64E-04 | -0.79 |
| ILMN_1910180 |              | 4.70E-04 | -0.44 |
| ILMN_2284810 | CIDEA        | 4.70E-04 | 0.18  |
| ILMN_1786789 | FAM102B      | 4.81E-04 | -0.60 |
| ILMN_1683475 | TOMM40       | 4.84E-04 | 0.89  |
| ILMN_1740185 | TPMT         | 4.86E-04 | -0.52 |
| ILMN_1810191 | PLA2G4C      | 4.88E-04 | -0.58 |
| ILMN_1677432 | SRGAP1       | 4.91E-04 | 0.44  |
| ILMN_2199768 | SLITRK4      | 4.93E-04 | -0.43 |
| ILMN_1763852 | ACACB        | 4.98E-04 | 0.49  |
| ILMN_2092333 | GPR141       | 5.00E-04 | -0.45 |
| ILMN_1781638 | HDDC3        | 5.00E-04 | 0.43  |
| ILMN_1844692 | FOXO3        | 5.05E-04 | 0.75  |
| ILMN_2345898 | SLA          | 5.17E-04 | 0.70  |
| ILMN_1699574 | NRP1         | 5.20E-04 | -0.61 |
| ILMN_1726327 | AMY1B        | 5.23E-04 | -0.37 |
| ILMN_1686116 | THBS1        | 5.32E-04 | 1.65  |
| ILMN_2261600 | FCGR1B       | 5.32E-04 | -0.85 |

|              |              |          |       |
|--------------|--------------|----------|-------|
| ILMN_1702899 | PLEKHA7      | 5.36E-04 | 0.47  |
| ILMN_2157441 | HLA-DRA      | 5.36E-04 | -0.59 |
| ILMN_1772964 | CCL8         | 5.36E-04 | -1.95 |
| ILMN_1753111 | NAMPT        | 5.36E-04 | -0.54 |
| ILMN_1746171 | H2AFY        | 5.47E-04 | 0.63  |
| ILMN_1912737 |              | 5.51E-04 | 0.50  |
| ILMN_1689655 | HLA-DRA      | 5.53E-04 | -0.52 |
| ILMN_1666819 | PHLDB1       | 5.53E-04 | -0.39 |
| ILMN_1688152 | IL27RA       | 5.58E-04 | 0.70  |
| ILMN_1731745 | NINJ2        | 5.60E-04 | 0.53  |
| ILMN_2170814 | LAMP3        | 5.62E-04 | -0.97 |
| ILMN_1758323 | ACPP         | 5.71E-04 | -0.33 |
| ILMN_2352090 | GPRC5C       | 5.80E-04 | 0.59  |
| ILMN_1779886 | TBC1D14      | 5.85E-04 | 0.55  |
| ILMN_2176063 | FCGR1A       | 5.86E-04 | -0.72 |
| ILMN_1815168 | HVCN1        | 5.86E-04 | -0.49 |
| ILMN_1716468 | LOC152195    | 5.99E-04 | 0.32  |
| ILMN_3248882 | KIAA0114     | 6.09E-04 | 0.31  |
| ILMN_1811909 | LOC402221    | 6.09E-04 | -0.72 |
| ILMN_2401641 | ALDH3A2      | 6.09E-04 | -0.50 |
| ILMN_1687757 | AKR1C4       | 6.13E-04 | 0.81  |
| ILMN_1706635 | ELANE        | 6.25E-04 | 0.25  |
| ILMN_1656378 | NMT2         | 6.25E-04 | -0.47 |
| ILMN_1658628 | C14orf72     | 6.29E-04 | 0.31  |
| ILMN_1741422 | FUT8         | 6.51E-04 | 0.41  |
| ILMN_1759792 | CLIP4        | 6.55E-04 | 0.77  |
| ILMN_1808405 | HLA-DQA1     | 6.55E-04 | -0.59 |
| ILMN_1791511 | TMEM176A     | 6.62E-04 | -0.68 |
| ILMN_2172755 | DEPDC6       | 6.69E-04 | 0.27  |
| ILMN_1663640 | MAOA         | 6.82E-04 | 1.21  |
| ILMN_1707727 | ANGPTL4      | 7.04E-04 | 0.67  |
| ILMN_1654609 | TIGA1        | 7.07E-04 | 0.87  |
| ILMN_1812091 | FAM20A       | 7.08E-04 | -0.56 |
| ILMN_2352077 | KL           | 7.18E-04 | -0.41 |
| ILMN_1712112 | RCAN1        | 7.20E-04 | 1.20  |
| ILMN_3176790 | LOC100128269 | 7.23E-04 | 0.45  |
| ILMN_1758938 | SLC31A2      | 7.33E-04 | 0.58  |
| ILMN_1660986 | PER3         | 7.35E-04 | -0.50 |
| ILMN_1690621 | GPR98        | 7.35E-04 | 0.18  |
| ILMN_1778836 | SFRS7        | 7.41E-04 | -1.02 |
| ILMN_2062754 | SRA1         | 7.56E-04 | -0.40 |
| ILMN_1683806 | MRC1L1       | 7.57E-04 | 0.42  |
| ILMN_1802808 | LOC654103    | 7.58E-04 | 0.78  |
| ILMN_2386179 | ZMYND8       | 7.59E-04 | 0.54  |
| ILMN_2338963 | SLC29A1      | 7.59E-04 | 0.40  |
| ILMN_1726597 | FAM65B       | 7.66E-04 | 0.39  |

|              |              |          |       |
|--------------|--------------|----------|-------|
| ILMN_1671404 | SVIL         | 7.76E-04 | -0.29 |
| ILMN_2077550 | RACGAP1      | 7.76E-04 | 0.40  |
| ILMN_1707695 | IFIT1        | 7.86E-04 | -0.59 |
| ILMN_1746819 | C5           | 7.86E-04 | 0.56  |
| ILMN_1667460 | SULF2        | 8.10E-04 | -0.57 |
| ILMN_1885771 |              | 8.10E-04 | 0.32  |
| ILMN_1714945 | ITPKC        | 8.20E-04 | 0.24  |
| ILMN_1751228 | C20orf46     | 8.20E-04 | -0.49 |
| ILMN_1709683 | RASSF2       | 8.20E-04 | 0.78  |
| ILMN_1806651 | PARP8        | 8.22E-04 | 0.66  |
| ILMN_1671183 | LOC648749    | 8.25E-04 | 0.23  |
| ILMN_2202940 | CHPT1        | 8.25E-04 | 0.57  |
| ILMN_1796642 | NCF2         | 8.25E-04 | -0.55 |
| ILMN_3234948 | LOC100130000 | 8.25E-04 | 0.39  |
| ILMN_1662640 | C20orf127    | 8.45E-04 | 0.66  |
| ILMN_3244583 | NCRNA00219   | 8.67E-04 | 0.82  |
| ILMN_1775380 | SMOX         | 8.68E-04 | -0.55 |
| ILMN_2348788 | CD44         | 8.69E-04 | -0.74 |
| ILMN_1691846 | G0S2         | 8.70E-04 | -0.24 |
| ILMN_1695829 | TTYH2        | 8.78E-04 | -0.38 |
| ILMN_1694810 | PANX2        | 8.86E-04 | -0.47 |
| ILMN_2081883 | IQCK         | 8.86E-04 | -0.34 |
| ILMN_1803739 | RPGRIP1      | 8.87E-04 | -0.23 |
| ILMN_1750974 | S100A9       | 9.08E-04 | -0.68 |
| ILMN_2333670 | RNASE1       | 9.08E-04 | 0.73  |
| ILMN_1790985 | dJ341D10.1   | 9.08E-04 | 0.56  |
| ILMN_1755364 | RALA         | 9.08E-04 | -0.58 |
| ILMN_1714167 | CYB5A        | 9.09E-04 | 0.62  |
| ILMN_2312340 | LILRB2       | 9.19E-04 | -0.54 |
| ILMN_1660549 | GPR177       | 9.26E-04 | 0.41  |
| ILMN_1715969 | SLC25A37     | 9.26E-04 | 0.52  |
| ILMN_1805148 | C2orf63      | 9.30E-04 | 0.32  |
| ILMN_1717799 | PRKCE        | 9.36E-04 | 0.23  |
| ILMN_1740169 | TYRO3        | 9.47E-04 | 0.15  |
| ILMN_1723971 | SLC29A1      | 9.50E-04 | 0.46  |
| ILMN_1690170 | CRABP2       | 9.51E-04 | -0.80 |
| ILMN_1684357 | C14orf139    | 9.51E-04 | 0.26  |
| ILMN_1754894 | C1orf162     | 9.61E-04 | 0.43  |
| ILMN_1752899 | BCL11A       | 9.74E-04 | -0.59 |
| ILMN_2070940 | CD302        | 9.74E-04 | 0.24  |
| ILMN_1677038 | FLJ21986     | 9.74E-04 | -0.72 |
| ILMN_1674926 | C19orf35     | 9.74E-04 | 0.21  |
| ILMN_2173291 | CYP4B1       | 9.79E-04 | -0.22 |
| ILMN_1705111 | FNDC3A       | 9.86E-04 | 0.43  |
| ILMN_1728799 | FBP1         | 9.89E-04 | 0.60  |
| ILMN_1709820 | AOAH         | 9.91E-04 | -0.60 |

|              |           |          |       |
|--------------|-----------|----------|-------|
| ILMN_1808789 | MYO5C     | 1.00E-03 | 0.26  |
| ILMN_1718558 | PARP12    | 1.01E-03 | -0.62 |
| ILMN_1776649 | LRRK2     | 1.02E-03 | 0.57  |
| ILMN_3251436 | DENND4C   | 1.03E-03 | 0.53  |
| ILMN_1783956 | ATP8B4    | 1.04E-03 | -0.67 |
| ILMN_1779857 | KLF4      | 1.04E-03 | 0.33  |
| ILMN_1772667 | P2RY1     | 1.04E-03 | 0.24  |
| ILMN_1682332 | GYPC      | 1.04E-03 | 0.77  |
| ILMN_1710078 | TMEM181   | 1.05E-03 | 0.55  |
| ILMN_1766363 | FLT3      | 1.05E-03 | 0.20  |
| ILMN_1704014 | LOC730256 | 1.05E-03 | 0.40  |
| ILMN_1742547 | NRP1      | 1.06E-03 | -0.42 |
| ILMN_1746588 | TALDO1    | 1.06E-03 | -0.48 |
| ILMN_2291644 | SIRT5     | 1.09E-03 | 0.18  |
| ILMN_2367818 | CD40      | 1.10E-03 | -0.28 |
| ILMN_1811624 | THADA     | 1.10E-03 | 0.47  |
| ILMN_1686989 | INSIG1    | 1.11E-03 | -0.35 |
| ILMN_1749403 | TSPAN33   | 1.12E-03 | -0.55 |
| ILMN_1716368 | CCDC111   | 1.12E-03 | 0.41  |
| ILMN_1687306 | LGALS2    | 1.15E-03 | -1.10 |
| ILMN_1750496 | ZBTB16    | 1.16E-03 | 0.24  |
| ILMN_1721626 | ARID5B    | 1.16E-03 | 0.52  |
| ILMN_1803256 | STOX2     | 1.17E-03 | -0.43 |
| ILMN_1812759 | GCH1      | 1.21E-03 | -0.46 |
| ILMN_1735680 | TMEM30A   | 1.21E-03 | -0.61 |
| ILMN_3239217 | LOC729057 | 1.21E-03 | 0.27  |
| ILMN_1729374 | ETFB      | 1.23E-03 | 0.65  |
| ILMN_2369953 | ARL4A     | 1.24E-03 | 0.26  |
| ILMN_1860638 |           | 1.24E-03 | -0.48 |
| ILMN_1661599 | DDIT4     | 1.24E-03 | 0.92  |
| ILMN_1906187 |           | 1.25E-03 | 0.34  |
| ILMN_1798706 | EBI2      | 1.25E-03 | 0.72  |
| ILMN_1701424 | LAMC2     | 1.25E-03 | 0.13  |
| ILMN_2202915 | FAR2      | 1.25E-03 | 0.61  |
| ILMN_2169261 | TNNI2     | 1.26E-03 | -0.31 |
| ILMN_1705570 | H2AFY2    | 1.27E-03 | -0.52 |
| ILMN_1808391 | DUSP4     | 1.28E-03 | 0.23  |
| ILMN_1693004 | C20orf117 | 1.29E-03 | -0.30 |
| ILMN_1805512 | WDR13     | 1.29E-03 | 0.48  |
| ILMN_1694596 | FAR2      | 1.33E-03 | 0.25  |
| ILMN_3235514 | GPR183    | 1.33E-03 | 0.45  |
| ILMN_1810628 | KIAA0367  | 1.34E-03 | -0.50 |
| ILMN_2169490 | TDRD9     | 1.36E-03 | 0.55  |
| ILMN_1761247 | PIR       | 1.37E-03 | -0.42 |
| ILMN_1770824 | ARHGAP4   | 1.38E-03 | -0.65 |
| ILMN_1677511 | PTGS2     | 1.38E-03 | -0.30 |

|              |              |          |       |
|--------------|--------------|----------|-------|
| ILMN_1776181 | BIRC3        | 1.38E-03 | -0.74 |
| ILMN_3249667 | LOC100133678 | 1.39E-03 | -0.65 |
| ILMN_1757552 | PTRF         | 1.39E-03 | -0.60 |
| ILMN_1719627 | SLC27A3      | 1.39E-03 | 0.56  |
| ILMN_1668822 | BATF         | 1.39E-03 | 0.65  |
| ILMN_1706344 | ABHD6        | 1.40E-03 | 0.59  |
| ILMN_1666546 | DUSP14       | 1.41E-03 | -0.60 |
| ILMN_1777190 | CFD          | 1.41E-03 | 0.54  |
| ILMN_1810235 | ATP6V1E2     | 1.42E-03 | 0.48  |
| ILMN_1702637 | BEX1         | 1.43E-03 | -0.31 |
| ILMN_1703955 | FBXO32       | 1.44E-03 | 0.78  |
| ILMN_3236036 | LOC283663    | 1.44E-03 | 0.29  |
| ILMN_1669113 | ATF5         | 1.44E-03 | -0.71 |
| ILMN_2136089 | MTE          | 1.44E-03 | 0.62  |
| ILMN_1793730 | TM7SF4       | 1.45E-03 | -0.92 |
| ILMN_2359287 | ITGA6        | 1.45E-03 | -0.25 |
| ILMN_1670895 | ZNF207       | 1.45E-03 | -0.47 |
| ILMN_1781536 | FAH          | 1.45E-03 | 0.67  |
| ILMN_1669599 | DENND4C      | 1.46E-03 | 0.58  |
| ILMN_2215194 | GCLC         | 1.46E-03 | 0.25  |
| ILMN_1771264 | ELL3         | 1.48E-03 | 0.29  |
| ILMN_3246065 | CCDC151      | 1.48E-03 | 0.27  |
| ILMN_1749521 | SLC35E3      | 1.49E-03 | 0.67  |
| ILMN_1799015 | PXMP2        | 1.49E-03 | 0.47  |
| ILMN_2170813 | LAMP3        | 1.49E-03 | -0.69 |
| ILMN_1769013 | ASGR1        | 1.50E-03 | -0.61 |
| ILMN_2214678 | MXD1         | 1.52E-03 | -0.69 |
| ILMN_2092850 | HPSE         | 1.52E-03 | -0.72 |
| ILMN_2168217 | EBI2         | 1.53E-03 | 0.70  |
| ILMN_2355168 | MGST1        | 1.53E-03 | 0.73  |
| ILMN_2367258 | SMOX         | 1.53E-03 | -0.37 |
| ILMN_2213558 | TMED10P      | 1.53E-03 | 0.46  |
| ILMN_1799598 | SIRT5        | 1.53E-03 | 0.37  |
| ILMN_2373495 | H2AFY        | 1.54E-03 | 0.40  |
| ILMN_2282641 | TBXAS1       | 1.54E-03 | 0.54  |
| ILMN_1699082 | MAPKAPK5     | 1.55E-03 | 0.54  |
| ILMN_2103547 | GOLGA8B      | 1.55E-03 | 0.45  |
| ILMN_1802082 | PRDM8        | 1.56E-03 | -0.22 |
| ILMN_1689088 | COLEC12      | 1.56E-03 | -0.66 |
| ILMN_3238680 | C7orf55      | 1.57E-03 | 0.54  |
| ILMN_1720373 | SLC7A5       | 1.57E-03 | -0.59 |
| ILMN_1710092 | ZBTB46       | 1.60E-03 | -0.31 |
| ILMN_1689160 | DPEP2        | 1.62E-03 | 0.71  |
| ILMN_3233229 | SNHG7        | 1.62E-03 | 0.53  |
| ILMN_1811148 | BMP2K        | 1.63E-03 | -0.46 |
| ILMN_1677098 | YPEL2        | 1.63E-03 | 0.55  |



|              |           |          |       |
|--------------|-----------|----------|-------|
| ILMN_1664631 | ADAM28    | 1.63E-03 | -0.32 |
| ILMN_1712719 | MAP7      | 1.63E-03 | -0.50 |
| ILMN_1658494 | C13orf15  | 1.65E-03 | -0.56 |
| ILMN_2400947 | CUGBP2    | 1.66E-03 | 0.35  |
| ILMN_1794165 | PGD       | 1.67E-03 | -0.46 |
| ILMN_1776967 | LRRC50    | 1.67E-03 | 0.75  |
| ILMN_1670672 | TMEM37    | 1.68E-03 | 0.48  |
| ILMN_3294024 | LOC644990 | 1.68E-03 | 0.30  |
| ILMN_2085862 | SLC15A3   | 1.69E-03 | -0.49 |
| ILMN_1811110 | TDRD9     | 1.70E-03 | 0.57  |
| ILMN_1748090 | SLC2A11   | 1.71E-03 | 0.45  |
| ILMN_1734229 | SPPL2A    | 1.71E-03 | -0.49 |
| ILMN_1719543 | MAF       | 1.72E-03 | -0.51 |
| ILMN_1714567 | AHNAK     | 1.72E-03 | 0.50  |
| ILMN_1713529 | SEMA6A    | 1.72E-03 | 0.20  |
| ILMN_1755873 | EMR3      | 1.75E-03 | -0.40 |
| ILMN_1804955 | CTSF      | 1.76E-03 | 0.30  |
| ILMN_1857295 |           | 1.76E-03 | 0.26  |
| ILMN_1677607 | SC5DL     | 1.76E-03 | -0.50 |
| ILMN_1752159 | AHNAK     | 1.77E-03 | 0.39  |
| ILMN_1678939 | VNN2      | 1.77E-03 | -0.71 |
| ILMN_2056606 | PPP1R1A   | 1.78E-03 | 0.46  |
| ILMN_1714083 | KLHL8     | 1.79E-03 | 0.45  |
| ILMN_1664233 | LOC644590 | 1.80E-03 | -0.29 |
| ILMN_1692517 | LOC653381 | 1.80E-03 | -0.60 |
| ILMN_1758864 | VNN2      | 1.81E-03 | -0.66 |
| ILMN_1810953 | LOC653496 | 1.81E-03 | 0.49  |
| ILMN_1656045 | BRUNOL6   | 1.81E-03 | 0.31  |
| ILMN_1770922 | TMEM45A   | 1.82E-03 | 0.48  |
| ILMN_1798360 | CXCR7     | 1.84E-03 | 0.43  |
| ILMN_1805902 | ELA1      | 1.84E-03 | 0.45  |
| ILMN_1747205 | JDP2      | 1.85E-03 | 0.60  |
| ILMN_1815951 | PCYOX1L   | 1.90E-03 | 0.29  |
| ILMN_3247139 | C17orf96  | 1.92E-03 | -0.50 |
| ILMN_2109708 | ECGF1     | 1.92E-03 | -0.50 |
| ILMN_3301740 | LOC729887 | 1.92E-03 | 0.39  |
| ILMN_1760347 | SRGN      | 1.92E-03 | -0.31 |
| ILMN_1738992 | MNDA      | 1.92E-03 | -0.63 |
| ILMN_1670134 | FADS1     | 1.93E-03 | -0.62 |
| ILMN_1674343 | NXF3      | 1.93E-03 | -0.34 |
| ILMN_1701017 | SAA1      | 1.93E-03 | 0.33  |
| ILMN_1654118 | BCL2L1    | 1.96E-03 | 0.46  |
| ILMN_1768469 | TCN1      | 1.97E-03 | 0.41  |
| ILMN_1713088 | MSI2      | 1.98E-03 | 0.32  |
| ILMN_1714592 | CDA       | 1.98E-03 | -0.40 |
| ILMN_1699887 | ST14      | 1.99E-03 | 0.70  |

|              |              |          |       |
|--------------|--------------|----------|-------|
| ILMN_2109197 | EPB41L3      | 1.99E-03 | -0.69 |
| ILMN_1763452 | EVI2B        | 1.99E-03 | 0.48  |
| ILMN_2338038 | AK3L1        | 1.99E-03 | -0.83 |
| ILMN_1786041 | ASB9         | 1.99E-03 | -0.21 |
| ILMN_2054607 | CYP4V2       | 1.99E-03 | -0.48 |
| ILMN_1836776 |              | 2.00E-03 | 0.24  |
| ILMN_1751425 | ERMP1        | 2.02E-03 | -0.41 |
| ILMN_1797728 | HMGCS1       | 2.02E-03 | -0.57 |
| ILMN_1901198 |              | 2.03E-03 | 0.40  |
| ILMN_1656011 | RGS1         | 2.04E-03 | 1.25  |
| ILMN_1803824 | ZDHHC9       | 2.07E-03 | 0.54  |
| ILMN_1683456 | CCL7         | 2.07E-03 | -0.97 |
| ILMN_3235358 | LOC100133080 | 2.07E-03 | 0.40  |
| ILMN_3289745 | LOC339352    | 2.07E-03 | 0.37  |
| ILMN_2196078 | SLAMF6       | 2.08E-03 | -0.78 |
| ILMN_2299045 | BMP2K        | 2.08E-03 | -0.43 |
| ILMN_1655796 | 42066        | 2.08E-03 | -0.31 |
| ILMN_1778136 | ZMYND15      | 2.11E-03 | -0.42 |
| ILMN_1714602 | CD86         | 2.12E-03 | -0.59 |
| ILMN_2214790 | LAMB1        | 2.16E-03 | 0.23  |
| ILMN_1784602 | CDKN1A       | 2.16E-03 | -0.48 |
| ILMN_1772521 | MTHFD1L      | 2.21E-03 | -0.28 |
| ILMN_2115011 | FGD2         | 2.22E-03 | 0.49  |
| ILMN_1702691 | TNFAIP3      | 2.24E-03 | 0.80  |
| ILMN_2110908 | MYC          | 2.24E-03 | 0.34  |
| ILMN_2052208 | GADD45A      | 2.26E-03 | 0.62  |
| ILMN_1843198 |              | 2.28E-03 | -0.77 |
| ILMN_1716276 | CCL4L2       | 2.30E-03 | -0.51 |
| ILMN_1812618 | ARAP3        | 2.30E-03 | -0.43 |
| ILMN_1656818 | GPR141       | 2.30E-03 | -0.35 |
| ILMN_2338997 | PTP4A2       | 2.30E-03 | -0.48 |
| ILMN_1677765 | LRP8         | 2.30E-03 | -0.54 |
| ILMN_3235832 | LOC728835    | 2.32E-03 | -0.53 |
| ILMN_1803429 | CD44         | 2.33E-03 | -0.60 |
| ILMN_1771800 | PRKCA        | 2.33E-03 | -0.44 |
| ILMN_1796216 | VASH1        | 2.33E-03 | -0.56 |
| ILMN_2406035 | LAMA3        | 2.35E-03 | 0.16  |
| ILMN_3211079 | LOC148430    | 2.35E-03 | 0.44  |
| ILMN_2082209 | C20orf100    | 2.35E-03 | -0.54 |
| ILMN_2189222 | KLHL8        | 2.35E-03 | 0.46  |
| ILMN_2379644 | CD74         | 2.36E-03 | -0.47 |
| ILMN_1859584 |              | 2.36E-03 | 0.40  |
| ILMN_1730809 | SLC29A2      | 2.37E-03 | 0.25  |
| ILMN_2395728 | HNRPUL1      | 2.37E-03 | 0.37  |
| ILMN_1657455 | CEACAM4      | 2.38E-03 | 0.20  |
| ILMN_1713143 | MRPL3        | 2.39E-03 | 0.53  |

|              |           |          |       |
|--------------|-----------|----------|-------|
| ILMN_1728262 | SAA2      | 2.39E-03 | 0.32  |
| ILMN_1687440 | HIPK2     | 2.39E-03 | 0.64  |
| ILMN_1797731 | MS4A6A    | 2.39E-03 | 0.75  |
| ILMN_1912287 |           | 2.40E-03 | -0.82 |
| ILMN_1800837 | CFDP1     | 2.41E-03 | 0.69  |
| ILMN_3308265 | MIR302C   | 2.43E-03 | -0.25 |
| ILMN_1758623 | HIST1H2BD | 2.44E-03 | 0.51  |
| ILMN_1714401 | SNX27     | 2.44E-03 | 0.55  |
| ILMN_1727315 | DENND1A   | 2.44E-03 | -0.26 |
| ILMN_1715508 | NNMT      | 2.44E-03 | 0.48  |
| ILMN_2385647 | ALAS1     | 2.45E-03 | -0.29 |
| ILMN_1756992 | MUC1      | 2.45E-03 | 0.70  |
| ILMN_1702609 | B3GNT5    | 2.47E-03 | 0.20  |
| ILMN_2407851 | IL17RD    | 2.48E-03 | -0.48 |
| ILMN_1698313 | CPM       | 2.48E-03 | 0.32  |
| ILMN_1704750 | LOC647000 | 2.48E-03 | -0.54 |
| ILMN_1802205 | RHOB      | 2.48E-03 | 0.45  |
| ILMN_2055634 | TIAF1     | 2.52E-03 | -0.64 |
| ILMN_3239445 | ZBTB42    | 2.54E-03 | -0.32 |
| ILMN_2376520 | PPP2R3A   | 2.57E-03 | -0.23 |
| ILMN_1676844 | NR1D2     | 2.60E-03 | -0.34 |
| ILMN_1781952 | MGST1     | 2.60E-03 | 0.86  |
| ILMN_1764362 | LYAR      | 2.60E-03 | 0.38  |
| ILMN_1795158 | FGR       | 2.62E-03 | 0.78  |
| ILMN_1784287 | TGFBR3    | 2.63E-03 | 0.28  |
| ILMN_1680618 | MYC       | 2.64E-03 | 0.44  |
| ILMN_1810147 | ZNF524    | 2.65E-03 | 0.36  |
| ILMN_2358069 | MAD1L1    | 2.65E-03 | 0.47  |
| ILMN_1888558 |           | 2.66E-03 | 0.40  |
| ILMN_1658926 | NOTCH3    | 2.75E-03 | 0.48  |
| ILMN_2408543 | PLAUR     | 2.76E-03 | -0.58 |
| ILMN_2148785 | GBP1      | 2.76E-03 | -0.62 |
| ILMN_3309349 | SNHG8     | 2.76E-03 | 0.61  |
| ILMN_2391051 | FCGR1B    | 2.76E-03 | -0.56 |
| ILMN_2365248 | HVCN1     | 2.77E-03 | -0.45 |
| ILMN_3240316 | TMSL3     | 2.77E-03 | -0.40 |
| ILMN_1776998 | DNAJA4    | 2.78E-03 | -0.40 |
| ILMN_1764396 | HDAC4     | 2.81E-03 | 0.30  |
| ILMN_3248591 | LTBP2     | 2.82E-03 | -0.23 |
| ILMN_1765146 | IFNAR2    | 2.82E-03 | -0.55 |
| ILMN_1740005 | SERPINF2  | 2.82E-03 | 0.20  |
| ILMN_1719343 | WDR26     | 2.82E-03 | 0.49  |
| ILMN_1738047 | C10orf73  | 2.83E-03 | 0.23  |
| ILMN_1691930 | CBX6      | 2.83E-03 | -0.57 |
| ILMN_1731714 | CREB5     | 2.84E-03 | -0.32 |
| ILMN_1789001 | SLC35B2   | 2.84E-03 | 0.38  |

|              |              |          |       |
|--------------|--------------|----------|-------|
| ILMN_1758400 | GRIN3A       | 2.85E-03 | -0.40 |
| ILMN_1778240 | GFOD1        | 2.86E-03 | 0.51  |
| ILMN_1767365 | PAK1         | 2.88E-03 | -0.51 |
| ILMN_1739428 | IFIT2        | 2.88E-03 | -0.84 |
| ILMN_1775327 | PKM2         | 2.88E-03 | -0.48 |
| ILMN_1737685 | CRLS1        | 2.88E-03 | 0.48  |
| ILMN_1675258 | LOC441268    | 2.88E-03 | -0.27 |
| ILMN_2357134 | SPHK1        | 2.88E-03 | -0.53 |
| ILMN_2299795 | CPM          | 2.89E-03 | 0.34  |
| ILMN_1793433 | RAB10        | 2.91E-03 | -0.51 |
| ILMN_1714417 | PSEN2        | 2.91E-03 | -0.44 |
| ILMN_1791328 | STK39        | 2.93E-03 | -0.47 |
| ILMN_1727466 | KCNMB4       | 2.95E-03 | -0.38 |
| ILMN_1668039 | GYPC         | 2.96E-03 | 0.80  |
| ILMN_1670322 | FCHO2        | 2.96E-03 | 0.56  |
| ILMN_1764609 | PWWP2B       | 2.96E-03 | 0.41  |
| ILMN_1787127 | SLC43A2      | 2.96E-03 | -0.55 |
| ILMN_3235221 | LOC644936    | 2.97E-03 | -0.63 |
| ILMN_3235003 | LOC100132395 | 2.97E-03 | 0.51  |
| ILMN_1680344 | MYOM1        | 2.97E-03 | 0.36  |
| ILMN_1682572 | KIAA0528     | 2.97E-03 | 0.61  |
| ILMN_3251341 | TUBA1C       | 2.97E-03 | -0.65 |
| ILMN_1717262 | PROCR        | 3.00E-03 | -0.47 |
| ILMN_2085012 | TMEM176B     | 3.02E-03 | -0.45 |
| ILMN_1755024 | IKBKE        | 3.11E-03 | -0.37 |
| ILMN_1788180 | RAB13        | 3.16E-03 | 0.49  |
| ILMN_2225537 | PTGR1        | 3.16E-03 | -0.59 |
| ILMN_3239937 | NUDT16P      | 3.17E-03 | 0.33  |
| ILMN_1812688 | C2orf18      | 3.18E-03 | 0.34  |
| ILMN_1683682 | DAGLA        | 3.18E-03 | -0.45 |
| ILMN_2310896 | NLRP3        | 3.21E-03 | -0.69 |
| ILMN_1780831 | SLC6A12      | 3.21E-03 | -0.54 |
| ILMN_1655191 | CASZ1        | 3.26E-03 | -0.35 |
| ILMN_1759097 | MLLT11       | 3.30E-03 | -0.51 |
| ILMN_3237376 | GRAMD1B      | 3.33E-03 | 0.23  |
| ILMN_1746013 | SPOCK1       | 3.34E-03 | 0.51  |
| ILMN_1667966 | C1orf24      | 3.36E-03 | -0.48 |
| ILMN_1765801 | GAA          | 3.36E-03 | 0.39  |
| ILMN_1657395 | HMGCR        | 3.37E-03 | -0.48 |
| ILMN_1754076 | CACNA2D3     | 3.41E-03 | -0.62 |
| ILMN_1737089 | CAPN5        | 3.43E-03 | -0.26 |
| ILMN_1707434 | LOC653778    | 3.43E-03 | 0.41  |
| ILMN_2060770 | RAI1         | 3.52E-03 | -0.29 |
| ILMN_1748983 | RTN4         | 3.53E-03 | 0.28  |
| ILMN_1660544 | ARRDC4       | 3.53E-03 | -0.23 |
| ILMN_2401618 | MLX          | 3.56E-03 | 0.44  |

|              |            |          |       |
|--------------|------------|----------|-------|
| ILMN_1800739 | SPINT2     | 3.60E-03 | -0.55 |
| ILMN_1796074 | C18orf56   | 3.63E-03 | 0.25  |
| ILMN_2366634 | PKM2       | 3.68E-03 | -0.46 |
| ILMN_3210914 | LOC344887  | 3.68E-03 | -0.25 |
| ILMN_2368318 | FGR        | 3.77E-03 | 0.75  |
| ILMN_1756541 | MXD4       | 3.79E-03 | 0.51  |
| ILMN_1716596 | NSMAF      | 3.83E-03 | 0.47  |
| ILMN_1677955 | ENTPD6     | 3.86E-03 | 0.18  |
| ILMN_1700067 | BTN3A2     | 3.86E-03 | 0.49  |
| ILMN_2362346 | TRPV4      | 3.87E-03 | -0.19 |
| ILMN_1654819 | ZNF589     | 3.88E-03 | 0.46  |
| ILMN_1755732 | ARMC9      | 3.88E-03 | -0.26 |
| ILMN_1709880 | RPLP0      | 3.89E-03 | 0.48  |
| ILMN_1786426 | TMEM149    | 3.89E-03 | -0.55 |
| ILMN_1660292 | MRPS21     | 3.89E-03 | 0.38  |
| ILMN_1663035 | SREBF1     | 3.89E-03 | -0.35 |
| ILMN_1695745 | DISP1      | 3.89E-03 | 0.38  |
| ILMN_3241234 | LOC730278  | 3.90E-03 | -0.45 |
| ILMN_1792473 | AIF1       | 3.90E-03 | -0.53 |
| ILMN_1752562 | CXCL5      | 3.93E-03 | -0.43 |
| ILMN_1809607 | PPIF       | 3.97E-03 | -0.17 |
| ILMN_2052373 | RAB17      | 3.97E-03 | -0.31 |
| ILMN_1790909 | NFE2L2     | 3.98E-03 | -0.50 |
| ILMN_1748797 | GRB2       | 3.98E-03 | -0.41 |
| ILMN_2412139 | CABYR      | 3.98E-03 | -0.16 |
| ILMN_1780533 | RNASE6     | 4.00E-03 | 0.70  |
| ILMN_1754149 | LETMD1     | 4.04E-03 | 0.37  |
| ILMN_2366330 | FERMT3     | 4.07E-03 | -0.43 |
| ILMN_1750549 | PI4K2A     | 4.12E-03 | -0.40 |
| ILMN_1848893 |            | 4.12E-03 | 0.19  |
| ILMN_3248218 | SNORD104   | 4.15E-03 | 0.36  |
| ILMN_2114568 | GBP5       | 4.18E-03 | -0.54 |
| ILMN_1681601 | SUCNR1     | 4.18E-03 | -0.75 |
| ILMN_1706873 | RPL34      | 4.19E-03 | 0.39  |
| ILMN_1700413 | MAFF       | 4.20E-03 | -0.24 |
| ILMN_1765876 | ARHGAP24   | 4.22E-03 | 0.24  |
| ILMN_1754121 | CSK        | 4.22E-03 | -0.51 |
| ILMN_1651498 | GADD45G    | 4.24E-03 | -0.38 |
| ILMN_2371911 | MUC1       | 4.25E-03 | 0.35  |
| ILMN_2092077 | PIP        | 4.28E-03 | 0.22  |
| ILMN_1701195 | PLA2G7     | 4.29E-03 | -0.53 |
| ILMN_1713751 | ADAM19     | 4.41E-03 | -0.66 |
| ILMN_1748538 | ALDH1A2    | 4.41E-03 | -0.36 |
| ILMN_2127379 | ST6GALNAC3 | 4.44E-03 | 0.26  |
| ILMN_1757406 | HIST1H1C   | 4.47E-03 | 0.56  |
| ILMN_1864422 |            | 4.54E-03 | 0.42  |

|              |              |          |       |
|--------------|--------------|----------|-------|
| ILMN_1702447 | IGF2BP2      | 4.55E-03 | 0.35  |
| ILMN_3247023 | FLJ22536     | 4.55E-03 | -0.64 |
| ILMN_1747650 | BMP6         | 4.55E-03 | -0.34 |
| ILMN_1743755 | LOC441150    | 4.55E-03 | 0.20  |
| ILMN_1685824 | B4GALT5      | 4.55E-03 | -0.51 |
| ILMN_2389347 | NR3C1        | 4.55E-03 | -0.32 |
| ILMN_2297765 | KCNMA1       | 4.55E-03 | 0.53  |
| ILMN_1800951 | ATXN1        | 4.63E-03 | -0.38 |
| ILMN_2049536 | TRPV2        | 4.63E-03 | -0.43 |
| ILMN_1745397 | OAS3         | 4.63E-03 | -0.59 |
| ILMN_2165993 | ITLN1        | 4.65E-03 | 0.25  |
| ILMN_1695311 | HLA-DMA      | 4.65E-03 | -0.47 |
| ILMN_1754114 | FLJ20021     | 4.66E-03 | 0.45  |
| ILMN_1667371 | SLA          | 4.66E-03 | 0.63  |
| ILMN_1656111 | MYLIP        | 4.67E-03 | 0.42  |
| ILMN_1676361 | ARHGAP22     | 4.67E-03 | -0.47 |
| ILMN_1708534 | PAX8         | 4.70E-03 | 0.27  |
| ILMN_1778723 | AMICA1       | 4.70E-03 | -0.64 |
| ILMN_2221564 | LYAR         | 4.73E-03 | 0.37  |
| ILMN_1736567 | CD74         | 4.75E-03 | -0.41 |
| ILMN_2383774 | TRAF3        | 4.77E-03 | -0.30 |
| ILMN_1903568 |              | 4.77E-03 | -0.43 |
| ILMN_1756928 | RTN1         | 4.82E-03 | -0.38 |
| ILMN_1756049 | NT5DC3       | 4.82E-03 | 0.28  |
| ILMN_2082314 | TOM1         | 4.84E-03 | -0.52 |
| ILMN_1807919 | TNS1         | 4.84E-03 | 0.32  |
| ILMN_2143250 | FAR1         | 4.84E-03 | -0.38 |
| ILMN_2152429 | C12orf76     | 4.86E-03 | 0.42  |
| ILMN_1789502 | GPC4         | 4.88E-03 | -0.67 |
| ILMN_1695959 | C21orf63     | 4.88E-03 | 0.19  |
| ILMN_1654735 | SLCO3A1      | 4.89E-03 | -0.43 |
| ILMN_1715175 | MET          | 4.90E-03 | 0.48  |
| ILMN_1702009 | SV2A         | 4.91E-03 | 0.14  |
| ILMN_1682799 | STAMBPL1     | 4.91E-03 | -0.25 |
| ILMN_1713867 | PMFBP1       | 4.92E-03 | 0.46  |
| ILMN_1793384 | JAK1         | 4.92E-03 | 0.42  |
| ILMN_3263694 | LOC100128771 | 4.92E-03 | 0.29  |
| ILMN_2332964 | LGMN         | 4.92E-03 | -0.42 |
| ILMN_3245057 | ASAP1        | 4.92E-03 | -0.48 |
| ILMN_1695991 | COLQ         | 4.95E-03 | -0.25 |
| ILMN_1715684 | LAMB3        | 4.95E-03 | -0.36 |
| ILMN_1790807 | XPC          | 4.96E-03 | 0.46  |
| ILMN_1736585 | TMED10       | 4.99E-03 | 0.47  |
| ILMN_1802292 | WDFY2        | 5.00E-03 | 0.30  |
| ILMN_1773363 | CIITA        | 5.05E-03 | -0.40 |
| ILMN_1739985 | TAGAP        | 5.05E-03 | -0.24 |

|              |              |          |       |
|--------------|--------------|----------|-------|
| ILMN_1658639 | SLC46A3      | 5.05E-03 | -0.53 |
| ILMN_1719224 | C17orf45     | 5.05E-03 | 0.46  |
| ILMN_1738816 | FOXO1        | 5.06E-03 | 0.42  |
| ILMN_1795275 | USP53        | 5.07E-03 | 0.13  |
| ILMN_3189621 | LOC100128221 | 5.07E-03 | 0.25  |
| ILMN_3236945 | PTPMT1       | 5.13E-03 | -0.44 |
| ILMN_2167426 | ASPHD2       | 5.16E-03 | -0.24 |
| ILMN_2343278 | PPAP2A       | 5.16E-03 | -0.24 |
| ILMN_1803033 | MGST1        | 5.16E-03 | 0.35  |
| ILMN_1868851 |              | 5.16E-03 | 0.30  |
| ILMN_1808768 | ROCK1        | 5.16E-03 | 0.32  |
| ILMN_2093343 | PLAC8        | 5.16E-03 | -0.57 |
| ILMN_1712082 | GCNT3        | 5.17E-03 | 0.17  |
| ILMN_1672650 | PKM2         | 5.17E-03 | -0.38 |
| ILMN_1780560 | MYO18A       | 5.18E-03 | -0.42 |
| ILMN_3250032 | XPR1         | 5.25E-03 | 0.20  |
| ILMN_1781155 | LYN          | 5.26E-03 | -0.57 |
| ILMN_1659257 | TNFRSF8      | 5.26E-03 | -0.23 |
| ILMN_1660727 | ENPP5        | 5.36E-03 | 0.16  |
| ILMN_2186319 | TSPAN2       | 5.43E-03 | 0.13  |
| ILMN_1651496 | HIST1H2BD    | 5.43E-03 | 0.49  |
| ILMN_1681703 | FOXO3        | 5.43E-03 | 0.55  |
| ILMN_1703926 | PTGER2       | 5.43E-03 | 0.44  |
| ILMN_2298365 | PPP2R2B      | 5.43E-03 | -0.40 |
| ILMN_1733998 | DHRS9        | 5.44E-03 | -0.70 |
| ILMN_1736939 | UGCG         | 5.44E-03 | -0.47 |
| ILMN_1726204 | SCRG1        | 5.45E-03 | 0.15  |
| ILMN_1652407 | ZMYND8       | 5.45E-03 | 0.40  |
| ILMN_1764596 | MPST         | 5.47E-03 | 0.30  |
| ILMN_1750373 | KAL1         | 5.48E-03 | -0.33 |
| ILMN_2041101 | ANXA2P1      | 5.49E-03 | -0.44 |
| ILMN_1815745 | SOX4         | 5.50E-03 | -0.40 |
| ILMN_2357730 | CCRK         | 5.55E-03 | -0.23 |
| ILMN_2336595 | ACSS2        | 5.55E-03 | -0.45 |
| ILMN_2330966 | PTK2B        | 5.60E-03 | 0.48  |
| ILMN_1785161 | CHCHD6       | 5.61E-03 | 0.28  |
| ILMN_1691508 | PLAUR        | 5.62E-03 | -0.41 |
| ILMN_1781565 | MESDC1       | 5.65E-03 | -0.25 |
| ILMN_3188984 | C20orf199    | 5.66E-03 | 0.57  |
| ILMN_1751963 | ZCWPW1       | 5.70E-03 | 0.40  |
| ILMN_3243055 | LOC732432    | 5.71E-03 | 0.39  |
| ILMN_3244014 | LOC100131967 | 5.74E-03 | -0.20 |
| ILMN_1679483 | INTS10       | 5.74E-03 | 0.40  |
| ILMN_2160476 | CCL22        | 5.75E-03 | -1.27 |
| ILMN_1712026 | NLRP3        | 5.76E-03 | -0.63 |
| ILMN_1730639 | SLC22A15     | 5.76E-03 | 0.39  |

|              |               |          |       |
|--------------|---------------|----------|-------|
| ILMN_1721035 | MS4A6A        | 5.76E-03 | 0.63  |
| ILMN_1708728 | H2AFJ         | 5.77E-03 | 0.42  |
| ILMN_1694140 | AFAP1L1       | 5.77E-03 | 0.44  |
| ILMN_2383383 | PIR           | 5.77E-03 | -0.36 |
| ILMN_2401933 | ATP2B1        | 5.77E-03 | -0.25 |
| ILMN_2316236 | HOPX          | 5.78E-03 | 1.06  |
| ILMN_1767816 | APH1B         | 5.80E-03 | 0.43  |
| ILMN_2119774 | CYP2R1        | 5.82E-03 | 0.41  |
| ILMN_1759563 | NRIP3         | 5.84E-03 | -0.55 |
| ILMN_1677404 | RAP2A         | 5.85E-03 | -0.48 |
| ILMN_1654778 | LSP1          | 5.85E-03 | -0.38 |
| ILMN_2179726 | C16orf93      | 5.85E-03 | -0.43 |
| ILMN_2395214 | FMNL3         | 5.85E-03 | -0.21 |
| ILMN_1778321 | SLC2A6        | 5.85E-03 | -0.47 |
| ILMN_1687612 | PPARG         | 5.85E-03 | 0.27  |
| ILMN_1706217 | TLR4          | 5.89E-03 | 0.43  |
| ILMN_1777691 | ARL9          | 5.89E-03 | 0.12  |
| ILMN_1711543 | C14orf169     | 5.89E-03 | -0.37 |
| ILMN_1763386 | BID           | 6.06E-03 | -0.54 |
| ILMN_1745374 | IFI35         | 6.06E-03 | -0.54 |
| ILMN_1808956 | C15orf27      | 6.06E-03 | -0.37 |
| ILMN_1784005 | LOC644615     | 6.09E-03 | 0.45  |
| ILMN_1768553 | LOC283050     | 6.10E-03 | -0.56 |
| ILMN_1701248 | TREM2         | 6.13E-03 | -0.57 |
| ILMN_1904138 |               | 6.14E-03 | 0.25  |
| ILMN_2362581 | FNDC3A        | 6.14E-03 | 0.35  |
| ILMN_1807106 | LDHA          | 6.15E-03 | 0.42  |
| ILMN_1768577 | PCSK6         | 6.15E-03 | -0.20 |
| ILMN_2396020 | DUSP6         | 6.15E-03 | -0.53 |
| ILMN_2066858 | TNFSF13B      | 6.15E-03 | -0.43 |
| ILMN_3232156 | C7orf58       | 6.17E-03 | -0.13 |
| ILMN_1683859 | SLC7A1        | 6.21E-03 | -0.51 |
| ILMN_1695271 | RPP25         | 6.21E-03 | 0.26  |
| ILMN_1748591 | ODC1          | 6.34E-03 | -0.37 |
| ILMN_2084073 | UCN           | 6.34E-03 | 0.34  |
| ILMN_1753342 | SAT1          | 6.34E-03 | 0.33  |
| ILMN_2047112 | RP11-529I10.4 | 6.34E-03 | -0.17 |
| ILMN_1757287 | MAPK6         | 6.34E-03 | 0.46  |
| ILMN_2198499 | MCART1        | 6.39E-03 | 0.18  |
| ILMN_1812503 | PHKA1         | 6.40E-03 | 0.25  |
| ILMN_1686748 | TMEM9         | 6.44E-03 | -0.33 |
| ILMN_1724066 | PLCB2         | 6.44E-03 | -0.39 |
| ILMN_1873620 |               | 6.47E-03 | 0.32  |
| ILMN_2376408 | DPM3          | 6.48E-03 | 0.37  |
| ILMN_1793476 | PRKCDBP       | 6.48E-03 | -0.48 |
| ILMN_1741356 | PRICKLE1      | 6.48E-03 | -0.20 |



|              |           |          |       |
|--------------|-----------|----------|-------|
| ILMN_1806165 | HSPA6     | 6.48E-03 | -0.54 |
| ILMN_2367681 | SPAG1     | 6.51E-03 | -0.24 |
| ILMN_1736510 | FOXN2     | 6.52E-03 | 0.50  |
| ILMN_1659914 | C9orf98   | 6.58E-03 | -0.41 |
| ILMN_2372413 | BID       | 6.64E-03 | -0.49 |
| ILMN_1749447 | RPS9      | 6.65E-03 | 0.45  |
| ILMN_1784948 | SPOCD1    | 6.67E-03 | -0.40 |
| ILMN_1764030 | CCL23     | 6.67E-03 | -0.59 |
| ILMN_1772387 | TLR2      | 6.67E-03 | 0.29  |
| ILMN_1708611 | RDX       | 6.74E-03 | 0.47  |
| ILMN_1660462 | MCOLN2    | 6.76E-03 | -0.68 |
| ILMN_2066066 | HLA-DRB6  | 6.76E-03 | -0.45 |
| ILMN_1803779 | AP2A2     | 6.80E-03 | 0.21  |
| ILMN_2376502 | RHOBTB1   | 6.82E-03 | 0.22  |
| ILMN_1717207 | MMP25     | 6.85E-03 | -0.57 |
| ILMN_3210491 | LOC389049 | 6.86E-03 | 0.36  |
| ILMN_2312897 | DGUOK     | 6.97E-03 | 0.43  |
| ILMN_2285817 | FAM89A    | 6.98E-03 | 0.63  |
| ILMN_1781812 | NR4A3     | 7.02E-03 | -0.17 |
| ILMN_1696407 | SFRS2     | 7.03E-03 | -0.46 |
| ILMN_1704531 | PTGR1     | 7.06E-03 | -0.56 |
| ILMN_1785071 | SEPP1     | 7.07E-03 | 0.62  |
| ILMN_1716547 | NAGK      | 7.11E-03 | -0.62 |
| ILMN_1874323 |           | 7.11E-03 | 0.14  |
| ILMN_1737514 | KYNU      | 7.16E-03 | -0.71 |
| ILMN_1743130 | PTGFRN    | 7.16E-03 | -0.29 |
| ILMN_1730491 | FMNL2     | 7.18E-03 | 0.36  |
| ILMN_1756862 | APOL3     | 7.18E-03 | -0.36 |
| ILMN_1673409 | MGC16121  | 7.18E-03 | -0.21 |
| ILMN_2077680 | CLDND2    | 7.19E-03 | 0.26  |
| ILMN_3275672 | LOC643873 | 7.20E-03 | 0.38  |
| ILMN_1806533 | PDE7B     | 7.21E-03 | 0.16  |
| ILMN_1679267 | TGM2      | 7.22E-03 | -0.24 |
| ILMN_2150654 | ZSWIM4    | 7.31E-03 | -0.44 |
| ILMN_1660031 | P2RY6     | 7.33E-03 | -0.70 |
| ILMN_1808114 | LYVE1     | 7.33E-03 | 0.56  |
| ILMN_1755411 | RBMS2     | 7.33E-03 | 0.28  |
| ILMN_1758642 | FLJ90757  | 7.33E-03 | -0.22 |
| ILMN_1725675 | ABCC6     | 7.35E-03 | -0.13 |
| ILMN_3199755 | LOC646821 | 7.38E-03 | -0.28 |
| ILMN_1755937 | ANXA2     | 7.40E-03 | -0.41 |
| ILMN_1797372 | C3orf58   | 7.40E-03 | 0.29  |
| ILMN_1790412 | FLJ39639  | 7.41E-03 | 0.31  |
| ILMN_2165867 | DHCR7     | 7.42E-03 | -0.38 |
| ILMN_1700507 | CLASP1    | 7.49E-03 | 0.34  |
| ILMN_1772588 | C6orf97   | 7.53E-03 | -0.17 |

|              |              |          |       |
|--------------|--------------|----------|-------|
| ILMN_1766359 | GATAD2B      | 7.56E-03 | 0.26  |
| ILMN_1705984 | HNMT         | 7.58E-03 | -0.27 |
| ILMN_1651557 | KDELC2       | 7.61E-03 | -0.31 |
| ILMN_1718936 | LST1         | 7.61E-03 | -0.55 |
| ILMN_1815719 | PLCG2        | 7.62E-03 | -0.48 |
| ILMN_3201115 | LOC440043    | 7.63E-03 | -0.36 |
| ILMN_1672496 | DNAJA1       | 7.64E-03 | -0.49 |
| ILMN_2395856 | TMEM218      | 7.70E-03 | 0.38  |
| ILMN_1769412 | RAPGEF1      | 7.70E-03 | -0.52 |
| ILMN_1662358 | MX1          | 7.72E-03 | -0.54 |
| ILMN_3211935 | LOC100132715 | 7.72E-03 | -0.39 |
| ILMN_1674574 | VNN1         | 7.76E-03 | 0.37  |
| ILMN_1665526 | TCEA2        | 7.76E-03 | 0.32  |
| ILMN_2284744 | HNMT         | 7.82E-03 | -0.49 |
| ILMN_2091792 | ENTPD6       | 7.90E-03 | 0.47  |
| ILMN_3251526 | USP13        | 7.90E-03 | -0.19 |
| ILMN_2095759 | OGFRL1       | 7.94E-03 | 0.39  |
| ILMN_1807825 | LY86         | 7.99E-03 | -0.53 |
| ILMN_1721978 | CARD11       | 8.00E-03 | 0.23  |
| ILMN_1810559 | RHOQ         | 8.00E-03 | 0.48  |
| ILMN_2222688 | TMSB4X       | 8.00E-03 | -0.23 |
| ILMN_1765557 | OLFML2B      | 8.00E-03 | 0.59  |
| ILMN_2410783 | GAA          | 8.01E-03 | 0.40  |
| ILMN_1788783 | TRAM2        | 8.09E-03 | 0.29  |
| ILMN_1729691 | SLC16A6      | 8.09E-03 | 0.42  |
| ILMN_1747347 | C17orf60     | 8.10E-03 | -0.42 |
| ILMN_1751898 | C12orf4      | 8.13E-03 | -0.33 |
| ILMN_1652906 | GBGT1        | 8.18E-03 | 0.37  |
| ILMN_1719988 | HAL          | 8.19E-03 | 0.16  |
| ILMN_2075189 | SLC35F2      | 8.26E-03 | -0.19 |
| ILMN_2398627 | TENC1        | 8.30E-03 | 0.11  |
| ILMN_1795300 | FLJ41603     | 8.33E-03 | 0.34  |
| ILMN_3199916 | LOC100130980 | 8.37E-03 | 0.35  |
| ILMN_1789614 | TPT1         | 8.40E-03 | 0.45  |
| ILMN_1698725 | FRMD3        | 8.40E-03 | -0.20 |
| ILMN_1654065 | ATOH8        | 8.45E-03 | 0.29  |
| ILMN_1808566 | TMEM180      | 8.45E-03 | 0.35  |
| ILMN_3211132 | LOC645173    | 8.45E-03 | 0.49  |
| ILMN_1699644 | 42066        | 8.45E-03 | -0.24 |
| ILMN_1653794 | C6orf160     | 8.45E-03 | 0.42  |
| ILMN_1684576 | CLN8         | 8.45E-03 | 0.21  |
| ILMN_1655930 | ELL2         | 8.45E-03 | 0.46  |
| ILMN_1726114 | SLC45A3      | 8.45E-03 | 0.34  |
| ILMN_2181445 | BCL2L13      | 8.45E-03 | -0.41 |
| ILMN_1690963 | ASAP1        | 8.45E-03 | -0.39 |
| ILMN_2370573 | XAF1         | 8.45E-03 | -0.45 |

|              |           |          |       |
|--------------|-----------|----------|-------|
| ILMN_1787461 | RUNX3     | 8.45E-03 | -0.46 |
| ILMN_1773125 | ENTPD1    | 8.45E-03 | -0.39 |
| ILMN_2083588 | TTC32     | 8.45E-03 | 0.30  |
| ILMN_1675117 | HSD17B11  | 8.46E-03 | 0.43  |
| ILMN_1754158 | C6orf185  | 8.46E-03 | 0.17  |
| ILMN_1721128 | TOMM34    | 8.49E-03 | -0.45 |
| ILMN_1773073 | PHYH      | 8.57E-03 | 0.42  |
| ILMN_1724897 | C14orf93  | 8.59E-03 | 0.28  |
| ILMN_1751726 | LOC649049 | 8.59E-03 | 0.42  |
| ILMN_1715991 | SDPR      | 8.60E-03 | 0.25  |
| ILMN_3240838 | SLC25A6   | 8.61E-03 | 0.41  |
| ILMN_1764321 | ACOT4     | 8.61E-03 | -0.53 |
| ILMN_1679797 | ADARB1    | 8.67E-03 | -0.36 |
| ILMN_1755235 | XPO6      | 8.67E-03 | -0.40 |
| ILMN_1764090 | AK3L1     | 8.69E-03 | -0.63 |
| ILMN_1793950 | P704P     | 8.70E-03 | -0.29 |
| ILMN_1653466 | HES4      | 8.73E-03 | -0.60 |
| ILMN_1699100 | SOAT1     | 8.78E-03 | 0.47  |
| ILMN_1684629 | C20orf26  | 8.78E-03 | -0.14 |
| ILMN_1669881 | TSPAN13   | 8.78E-03 | -0.42 |
| ILMN_1664718 | CYP51A1   | 8.82E-03 | -0.39 |
| ILMN_1767900 | LGI2      | 8.84E-03 | -0.14 |
| ILMN_3281195 | LOC440459 | 8.84E-03 | 0.23  |
| ILMN_1714197 | ACSS2     | 8.89E-03 | -0.48 |
| ILMN_1656165 | USP9X     | 8.89E-03 | 0.38  |
| ILMN_1660973 | GAD1      | 8.90E-03 | 0.18  |
| ILMN_1712532 | CARD9     | 8.90E-03 | -0.72 |
| ILMN_3243714 | LOC642073 | 8.91E-03 | -0.48 |
| ILMN_1691097 | HSP90AA1  | 8.91E-03 | -0.44 |
| ILMN_1763433 | TRIM9     | 8.92E-03 | 0.24  |
| ILMN_1692664 | PRR5      | 8.92E-03 | -0.28 |
| ILMN_1769406 | PIAS2     | 8.92E-03 | 0.19  |
| ILMN_1748883 | CDKN2D    | 8.92E-03 | 0.28  |
| ILMN_1763228 | MEF2D     | 8.93E-03 | -0.44 |
| ILMN_3245869 | LOC440957 | 8.94E-03 | 0.54  |
| ILMN_1730201 | DTNA      | 8.94E-03 | -0.25 |
| ILMN_1751561 | CAMK1D    | 8.94E-03 | 0.23  |
| ILMN_1741431 | AOC2      | 8.94E-03 | 0.33  |
| ILMN_1749070 | HLA-DPB1  | 8.94E-03 | -0.28 |
| ILMN_1788540 | LOC732075 | 8.95E-03 | 0.14  |
| ILMN_1752965 | GREM1     | 9.03E-03 | -0.66 |
| ILMN_1782829 | GLTSCR1   | 9.03E-03 | 0.34  |
| ILMN_3207020 | LOC388556 | 9.07E-03 | 0.46  |
| ILMN_1806809 | ZNF189    | 9.09E-03 | 0.43  |
| ILMN_1752046 | SH2B3     | 9.09E-03 | -0.44 |
| ILMN_1756590 | SYS1      | 9.15E-03 | 0.44  |

|              |          |          |       |
|--------------|----------|----------|-------|
| ILMN_3192791 | HNRNPM   | 9.15E-03 | -0.35 |
| ILMN_1679912 | DPH3     | 9.19E-03 | 0.38  |
| ILMN_1666269 | CTSZ     | 9.25E-03 | -0.53 |
| ILMN_1720604 | ARSG     | 9.27E-03 | 0.26  |
| ILMN_1682761 | C17orf87 | 9.30E-03 | -0.51 |
| ILMN_3305614 | ZNF812   | 9.33E-03 | 0.15  |
| ILMN_1801476 | CDS1     | 9.35E-03 | -0.21 |
| ILMN_3184724 | C7orf58  | 9.35E-03 | -0.13 |
| ILMN_1796508 | TOP1MT   | 9.39E-03 | -0.32 |
| ILMN_1655497 | EIF4B    | 9.45E-03 | 0.41  |
| ILMN_1698668 | NR1D2    | 9.50E-03 | -0.18 |
| ILMN_1689378 | CCRN4L   | 9.53E-03 | -0.32 |
| ILMN_1678547 | CPNE9    | 9.56E-03 | -0.14 |
| ILMN_1779547 | HPSE     | 9.65E-03 | -0.81 |
| ILMN_2143795 | MGC4677  | 9.68E-03 | -0.58 |
| ILMN_1716563 | PRKCB1   | 9.69E-03 | -0.18 |
| ILMN_1735367 | HSD17B11 | 9.69E-03 | 0.47  |
| ILMN_1738523 | MYD88    | 9.73E-03 | -0.55 |
| ILMN_1766637 | GLA      | 9.73E-03 | -0.41 |
| ILMN_1770373 | TMEM39A  | 9.74E-03 | 0.19  |
| ILMN_2341595 | KITLG    | 9.78E-03 | -0.59 |

**Apoptotic neutrophils (PMNs)**

| <b>ProbeID</b> | <b>Gene Symbol</b> | <b>FDR</b> | <b>Log<sub>2</sub>[PMNs/NoTx]</b> |
|----------------|--------------------|------------|-----------------------------------|
| ILMN_2053415   | LDLR               | 6.82E-08   | -1.96                             |
| ILMN_1800512   | HMOX1              | 3.94E-04   | 1.44                              |
| ILMN_1793474   | INSIG1             | 3.94E-04   | -1.01                             |
| ILMN_1670134   | FADS1              | 3.94E-04   | -0.78                             |
| ILMN_1742618   | XAF1               | 5.89E-04   | -0.84                             |
| ILMN_1723912   | IFI44L             | 1.02E-03   | -1.39                             |
| ILMN_1661599   | DDIT4              | 1.11E-03   | -1.07                             |
| ILMN_2197365   | RGS2               | 1.43E-03   | -0.82                             |
| ILMN_1747347   | C17orf60           | 1.68E-03   | -0.70                             |
| ILMN_1780769   | TUBB2C             | 1.73E-03   | 0.65                              |
| ILMN_3306997   | METTL1             | 1.84E-03   | 0.55                              |
| ILMN_1727309   | FAM82A2            | 1.84E-03   | 0.93                              |
| ILMN_1711608   | SSBP2              | 1.84E-03   | -0.44                             |
| ILMN_1657435   | MT1M               | 1.97E-03   | -1.68                             |
| ILMN_1718766   | MT1F               | 2.07E-03   | -0.94                             |
| ILMN_1740418   | CYP27B1            | 2.86E-03   | 0.78                              |
| ILMN_2136089   | MTE                | 2.86E-03   | -1.31                             |
| ILMN_1662640   | C20orf127          | 3.37E-03   | -1.27                             |
| ILMN_1720889   | SC4MOL             | 3.37E-03   | -0.83                             |
| ILMN_3245458   | SNORA61            | 3.37E-03   | 0.56                              |

|              |           |          |       |
|--------------|-----------|----------|-------|
| ILMN_1807919 | TNS1      | 3.37E-03 | 0.49  |
| ILMN_1795963 | OKL38     | 3.37E-03 | 0.49  |
| ILMN_1778144 | FLJ20489  | 3.55E-03 | 0.78  |
| ILMN_1696537 | DDIT4L    | 3.68E-03 | 0.58  |
| ILMN_1761281 | LOC441019 | 3.93E-03 | -1.21 |
| ILMN_1689842 | SC4MOL    | 3.93E-03 | -0.60 |
| ILMN_2403237 | CHN2      | 4.26E-03 | -0.45 |
| ILMN_1753111 | NAMPT     | 4.26E-03 | -0.55 |
| ILMN_1798181 | IRF7      | 4.26E-03 | -0.92 |
| ILMN_1653712 | UAP1L1    | 4.26E-03 | 0.42  |
| ILMN_1699071 | C21orf7   | 4.26E-03 | -0.50 |
| ILMN_2144088 | FDFT1     | 4.26E-03 | -0.59 |
| ILMN_1657708 | MGLL      | 4.27E-03 | 0.47  |
| ILMN_2195821 | C5orf41   | 4.27E-03 | -0.52 |
| ILMN_1769876 | TBC1D2    | 4.27E-03 | 0.59  |
| ILMN_1659801 | ATP6V1C1  | 4.27E-03 | 0.40  |
| ILMN_1687757 | AKR1C4    | 4.28E-03 | 0.77  |
| ILMN_2312194 | CYB5A     | 4.70E-03 | 0.54  |
| ILMN_2361603 | NDRG2     | 4.70E-03 | 0.60  |
| ILMN_1697309 | NCF1      | 4.72E-03 | -0.64 |
| ILMN_1726114 | SLC45A3   | 4.74E-03 | 0.58  |
| ILMN_2310896 | NLRP3     | 4.74E-03 | -0.53 |
| ILMN_1729188 | HAMP      | 4.74E-03 | 1.47  |
| ILMN_1712026 | NLRP3     | 4.90E-03 | -0.57 |
| ILMN_1757867 | MTM       | 4.97E-03 | -0.25 |
| ILMN_1707695 | IFIT1     | 4.97E-03 | -0.94 |
| ILMN_1674183 | MT1JP     | 4.97E-03 | -0.72 |
| ILMN_2329927 | ABCG1     | 4.99E-03 | 1.04  |
| ILMN_1755075 | IDI1      | 4.99E-03 | -0.48 |
| ILMN_1654118 | BCL2L1    | 5.32E-03 | 0.66  |
| ILMN_1720373 | SLC7A5    | 5.32E-03 | -0.78 |
| ILMN_2174612 | CNOT8     | 5.54E-03 | -0.45 |
| ILMN_1751901 | TMEM163   | 5.56E-03 | 0.33  |
| ILMN_1660436 | HSPA1B    | 5.56E-03 | 0.52  |
| ILMN_1739751 | SLC26A11  | 5.56E-03 | 0.83  |
| ILMN_1815500 | ITPR3     | 6.32E-03 | 0.32  |
| ILMN_1683456 | CCL7      | 6.32E-03 | 0.49  |
| ILMN_2165993 | ITLN1     | 6.32E-03 | 0.36  |
| ILMN_3213185 | LOC645452 | 6.32E-03 | 0.54  |
| ILMN_1723412 | ASCL2     | 6.32E-03 | -0.66 |
| ILMN_1764383 | MCOLN1    | 6.32E-03 | 0.55  |
| ILMN_1712475 | HS3ST2    | 6.32E-03 | 0.72  |
| ILMN_2405521 | MTHFD2    | 6.40E-03 | -0.49 |
| ILMN_1755974 | ALDOC     | 6.40E-03 | -0.47 |
| ILMN_1776649 | LRRK2     | 6.44E-03 | -0.37 |
| ILMN_1814022 | NR1H3     | 6.67E-03 | 0.77  |

|              |              |          |       |
|--------------|--------------|----------|-------|
| ILMN_1655077 | PRDM1        | 6.71E-03 | -0.46 |
| ILMN_1736939 | UGCG         | 6.71E-03 | 0.69  |
| ILMN_2376403 | TSC22D3      | 6.81E-03 | -0.47 |
| ILMN_1652198 | CCM2         | 6.83E-03 | -0.45 |
| ILMN_1720048 | CCL2         | 7.25E-03 | 0.79  |
| ILMN_1814305 | SAMD9        | 7.25E-03 | -0.85 |
| ILMN_1672662 | SLC20A1      | 7.25E-03 | 0.53  |
| ILMN_2082209 | C20orf100    | 7.40E-03 | -0.54 |
| ILMN_1736982 | PHACTR1      | 7.59E-03 | 0.45  |
| ILMN_3238183 | BMS1P5       | 7.85E-03 | 0.47  |
| ILMN_2225974 | GCLM         | 8.34E-03 | 0.34  |
| ILMN_3226214 | LOC728755    | 8.34E-03 | 0.34  |
| ILMN_2117809 | DUXAP3       | 8.34E-03 | 0.47  |
| ILMN_3235637 | LOC100128288 | 8.34E-03 | 0.47  |
| ILMN_1773006 | FABP4        | 8.78E-03 | 0.55  |
| ILMN_1713124 | AKR1C3       | 8.94E-03 | 1.34  |
| ILMN_2348487 | EMR3         | 9.26E-03 | -0.33 |
| ILMN_2049364 | FAM119A      | 9.26E-03 | 0.48  |
| ILMN_1661622 | TBC1D7       | 9.26E-03 | 0.55  |
| ILMN_1811616 | EEPD1        | 9.33E-03 | 0.50  |
| ILMN_1689371 | GIMAP2       | 9.33E-03 | -0.39 |
| ILMN_1692177 | TSC22D1      | 9.36E-03 | -0.45 |
| ILMN_1700232 | FBXO30       | 9.43E-03 | 0.34  |
| ILMN_1677607 | SC5DL        | 9.43E-03 | -0.43 |
| ILMN_1678799 | RAPGEF1      | 9.43E-03 | 0.20  |
| ILMN_3223500 | LOC728903    | 9.44E-03 | 0.49  |
| ILMN_1700690 | VAT1         | 9.79E-03 | 0.45  |
| ILMN_2291619 | RAB3IP       | 9.90E-03 | 0.26  |
| ILMN_2150294 | FKBP14       | 9.90E-03 | 0.57  |
| ILMN_1788547 | GCLM         | 9.90E-03 | 0.60  |
| ILMN_1714393 | RAB24        | 9.90E-03 | -0.28 |
| ILMN_2379718 | RAB24        | 9.99E-03 | -0.40 |
| ILMN_1683923 | MT1H         | 9.99E-03 | -1.29 |
| ILMN_1674063 | OAS2         | 9.99E-03 | -0.82 |
| ILMN_1707088 | DENND2D      | 9.99E-03 | 0.52  |

**Supplemental Table E3.** List of differentially enriched pathways in non-CF subjects exposed to 5 different M2 stimuli. FDR: false discovery rate.

| <b>Up-regulated in response to IL10</b>                                   |            |
|---------------------------------------------------------------------------|------------|
| <b>Gene Set Name</b>                                                      | <b>FDR</b> |
| KEGG_PATHOGENIC_ESCHERICHIA_COLI_INFECTION                                | 0.00E+00   |
| GO_COATED_PIT                                                             | 0.00E+00   |
| GO_ENDOCYTOSIS                                                            | 0.00E+00   |
| PID_PDGFRB_PATHWAY                                                        | 1.96E-04   |
| REACTOME_L1CAM_INTERACTIONS                                               | 2.29E-04   |
| REACTOME_SIGNAL_TRANSDUCTION_BY_L1                                        | 2.75E-04   |
| GO_LEUKOCYTE_MIGRATION                                                    | 3.43E-04   |
| PID_VEGFR1_2_PATHWAY                                                      | 5.14E-04   |
| GO_EPHRIN_RECEPTOR_SIGNALING_PATHWAY                                      | 6.04E-04   |
| GO_CLATHRIN_COATED_VESICLE_MEMBRANE                                       | 1.09E-03   |
| GO_STRUCTURAL_CONSTITUENT_OF_CYTOSKELETON                                 | 1.46E-03   |
| GO_LEUKOCYTE_CHEMOTAXIS                                                   | 1.48E-03   |
| GO_FC_GAMMA_RECEPTOR_SIGNALING_PATHWAY                                    | 1.49E-03   |
| REACTOME_AXON_GUIDANCE                                                    | 1.58E-03   |
| GO_PHAGOCYTOSIS                                                           | 1.62E-03   |
| GO_TAXIS                                                                  | 1.64E-03   |
| GO_ESTABLISHMENT_OF_PROTEIN_LOCALIZATION_TO_PLASMA_MEMBRANE               | 1.67E-03   |
| GO_CELL_CHEMOTAXIS                                                        | 1.68E-03   |
| GO_MEMBRANE_MICRODOMAIN                                                   | 1.69E-03   |
| GO_PLASMA_MEMBRANE_ORGANIZATION                                           | 1.71E-03   |
| GO_RECEPTOR_MEDIATED_ENDOCYTOSIS                                          | 1.73E-03   |
| GO_MYELOID_LEUKOCYTE_MIGRATION                                            | 1.76E-03   |
| PID_MET_PATHWAY                                                           | 1.97E-03   |
| GO_REGULATION_OF_PATHWAY_RESTRICTED_SMAD_PROTEIN_PHOSPHORYLATION          | 2.23E-03   |
| GO_VESICLE_COAT                                                           | 2.25E-03   |
| PID_ARF6_TRAFFICKING_PATHWAY                                              | 2.95E-03   |
| REACTOME_DEVELOPMENTAL_BIOLOGY                                            | 3.71E-03   |
| GO_GRANULOCYTE_MIGRATION                                                  | 4.06E-03   |
| GO_LABYRINTHINE_LAYER_DEVELOPMENT                                         | 4.49E-03   |
| BIOCARTA_MCALPAIN_PATHWAY                                                 | 5.25E-03   |
| PID_TOLL_ENDOGENOUS_PATHWAY                                               | 5.39E-03   |
| GO_CHEMOKINE_RECEPTOR_BINDING                                             | 7.60E-03   |
| PID_FCER1_PATHWAY                                                         | 7.62E-03   |
| GO_POSITIVE_REGULATION_OF_PATHWAY_RESTRICTED_SMAD_PROTEIN_PHOSPHORYLATION | 7.63E-03   |
| GO_REGULATION_OF_ORGAN_GROWTH                                             | 7.68E-03   |
| GO_RESPONSE_TO_FLUID_SHEAR_STRESS                                         | 7.74E-03   |
| GO_EMBRYONIC_PLACENTA_DEVELOPMENT                                         | 7.84E-03   |
| KEGG_REGULATION_OF_ACTIN_CYTOSKELETON                                     | 7.84E-03   |

|                                                                            |          |
|----------------------------------------------------------------------------|----------|
| GO_NITRIC_OXIDE_MEDIATED_SIGNAL_TRANSDUCTION                               | 7.85E-03 |
| PID_FAK_PATHWAY                                                            | 7.87E-03 |
| PID_HDAC_CLASSII_PATHWAY                                                   | 7.89E-03 |
| PID_AP1_PATHWAY                                                            | 7.92E-03 |
| GO_CLATHRIN_COATED_VESICLE                                                 | 7.93E-03 |
| GO_REGULATION_OF_ENDOCYTOSIS                                               | 8.06E-03 |
| GO_POSITIVE_REGULATION_OF_RESPONSE_TO_WOUNDING                             | 8.09E-03 |
| KEGG_GAP_JUNCTION                                                          | 8.15E-03 |
| GO_PROTEIN_LOCALIZATION_TO_CELL_PERIPHERY                                  | 8.22E-03 |
| PID_EPHB_FWD_PATHWAY                                                       | 8.25E-03 |
| HALLMARK_EPITHELIAL_MESENCHYMAL_TRANSITION                                 | 8.29E-03 |
| GO_LYMPHOCYTE_CHEMOTAXIS                                                   | 9.11E-03 |
| GO_REGULATION_OF_ACTIN_FILAMENT_LENGTH                                     | 9.26E-03 |
| GO_CCR_CHEMOKINE_RECEPTOR_BINDING                                          | 9.37E-03 |
| GO_REGULATION_OF_BIOMINERAL_TISSUE_DEVELOPMENT                             | 9.79E-03 |
| GO_ACTIN_CYTOSKELETON_REORGANIZATION                                       | 1.00E-02 |
| PID_WNT_NONCANONICAL_PATHWAY                                               | 1.01E-02 |
| REACTOME_SEMAPHORIN_INTERACTIONS                                           | 1.01E-02 |
| GO_MONOCYTE_CHEMOTAXIS                                                     | 1.02E-02 |
| GO_REGULATION_OF_ACTIN_FILAMENT_DEPOLYMERIZATION                           | 1.02E-02 |
| GO_LYMPHOCYTE_MIGRATION                                                    | 1.02E-02 |
| GO_IGG_BINDING                                                             | 1.04E-02 |
| GO_WOUND_HEALING                                                           | 1.05E-02 |
| GO_CELL_LEADING_EDGE                                                       | 1.05E-02 |
| KEGG_ADHERENS_JUNCTION                                                     | 1.07E-02 |
| GO_PHOSPHOLIPASE_C_ACTIVATING_G_PROTEIN_COUPLED_RECEPTOR_SIGNALING_PATHWAY | 1.08E-02 |
| GO_REGULATION_OF_VESICLE_MEDIATED_TRANSPORT                                | 1.08E-02 |
| GO_ACTIN_FILAMENT_BASED_PROCESS                                            | 1.09E-02 |
| GO_CALCIIUM_ACTIVATED_POTASSIUM_CHANNEL_ACTIVITY                           | 1.09E-02 |
| GO_POSITIVE_REGULATION_OF_RESPONSE_TO_EXTERNAL_STIMULUS                    | 1.10E-02 |
| GO_HEMOSTASIS                                                              | 1.10E-02 |
| GO_ENDOSOMAL_PART                                                          | 1.10E-02 |
| PID_NOTCH_PATHWAY                                                          | 1.11E-02 |
| GO_POSITIVE_REGULATION_OF_ENDOCYTOSIS                                      | 1.11E-02 |
| GO_CELL_SUBSTRATE_JUNCTION                                                 | 1.11E-02 |
| GO_CLATHRIN_COATED_ENDOCYTIC_VESICLE                                       | 1.18E-02 |
| PID_ANGIOPOIETIN_RECEPTOR_PATHWAY                                          | 1.19E-02 |
| REACTOME_FORMATION_OF_TUBULIN_FOLDING_INTERMEDIATES_BY_CCT_TRIC            | 1.25E-02 |
| GO_EARLY_ENDOSOME                                                          | 1.27E-02 |
| SIG_INSULIN_RECEPTOR_PATHWAY_IN_CARDIAC_MYOCYTES                           | 1.31E-02 |
| REACTOME_POST_CHAPERONIN_TUBULIN_FOLDING_PATHWAY                           | 1.32E-02 |
| GO_CLATHRIN_VESICLE_COAT                                                   | 1.32E-02 |
| GO_EARLY_ENDOSOME_MEMBRANE                                                 | 1.33E-02 |



|                                                                     |          |
|---------------------------------------------------------------------|----------|
| GO_REGULATION_OF_ACTIN_FILAMENT_BASED_PROCESS                       | 1.35E-02 |
| GO_TRANSMEMBRANE_RECEPTOR_PROTEIN_TYROSINE_KINASE_SIGNALING_PATHWAY | 1.36E-02 |
| GO_CLATHRIN_COATED_ENDOCYTIC_VESICLE_MEMBRANE                       | 1.36E-02 |
| GO_CALCIIUM_ACTIVATED_CATION_CHANNEL_ACTIVITY                       | 1.36E-02 |
| GO_CLATHRIN_COAT_OF_COATED_PIT                                      | 1.36E-02 |
| GO_REGULATION_OF_CELLULAR_RESPONSE_TO_GROWTH_FACTOR_STIMULUS        | 1.37E-02 |
| GO_PHAGOCYTOIC_CUP                                                  | 1.37E-02 |
| GO_REGULATION_OF_CELLULAR_COMPONENT_SIZE                            | 1.37E-02 |
| GO_RECYCLING_ENDOSOME_MEMBRANE                                      | 1.38E-02 |
| REACTOME_PROTEIN_FOLDING                                            | 1.39E-02 |
| GO_REGULATION_OF_INFLAMMATORY_RESPONSE                              | 1.40E-02 |
| GO_MORPHOGENESIS_OF_AN_EPITHELIUM                                   | 1.43E-02 |
| GO_RESPONSE_TO_LAMINAR_FLUID_SHEAR_STRESS                           | 1.44E-02 |
| GO_RESPONSE_TO_GROWTH_HORMONE                                       | 1.44E-02 |
| GO_MEMBRANE_RAFT_ORGANIZATION                                       | 1.45E-02 |
| GO_NEGATIVE_REGULATION_OF_ERBB_SIGNALING_PATHWAY                    | 1.45E-02 |
| HALLMARK_TGF_BETA_SIGNALING                                         | 1.46E-02 |
| REACTOME_NGF_SIGNALLING_VIA_TRKA_FROM_THE_PLASMA_MEMBRANE           | 1.48E-02 |
| GO_BLOOD_MICROPARTICLE                                              | 1.51E-02 |
| GO_EMBRYONIC_PLACENTA_MORPHOGENESIS                                 | 1.52E-02 |
| GO_NEGATIVE_REGULATION_OF_ACTIN_FILAMENT_DEPOLYMERIZATION           | 1.52E-02 |
| GO_LAMELLIPODIUM                                                    | 1.52E-02 |
| KEGG_ENDOCYTOSIS                                                    | 1.52E-02 |
| GO_NEGATIVE_REGULATION_OF_PROTEIN_LOCALIZATION_TO_CELL_PERIPHERY    | 1.53E-02 |
| PID_NFAT_TFPATHWAY                                                  | 1.53E-02 |
| GO_ANCHORING_JUNCTION                                               | 1.53E-02 |
| GO_CARGO_RECEPTOR_ACTIVITY                                          | 1.54E-02 |
| REACTOME_PLATELET_ACTIVATION_SIGNALING_AND_AGGREGATION              | 1.54E-02 |
| BIOCARTA_ERK_PATHWAY                                                | 1.57E-02 |
| GO_MANGANESE_ION_BINDING                                            | 1.59E-02 |
| HALLMARK_TNFA_SIGNALING_VIA_NFKB                                    | 1.60E-02 |
| GO_NEGATIVE_REGULATION_OF_CYCLIC_NUCLEOTIDE_METABOLIC_PROCESS       | 1.61E-02 |
| SA_B_CELL_RECEPTOR_COMPLEXES                                        | 1.61E-02 |
| GO_REGULATION_OF_RESPONSE_TO_WOUNDING                               | 1.61E-02 |
| GO_SMALL_GTPASE_MEDIATED_SIGNAL_TRANSDUCTION                        | 1.61E-02 |
| GO_ACTOMYOSIN                                                       | 1.64E-02 |
| KEGG_HEMATOPOIETIC_CELL_LINEAGE                                     | 1.71E-02 |
| GO_HIPPO_SIGNALING                                                  | 1.75E-02 |
| BIOCARTA_ARAP_PATHWAY                                               | 1.75E-02 |
| REACTOME_IL_3_5_AND_GM-CSF_SIGNALING                                | 1.76E-02 |
| GO_REGULATION_OF_PEPTIDYL_TYROSINE_PHOSPHORYLATION                  | 1.76E-02 |
| HALLMARK_INFLAMMATORY_RESPONSE                                      | 1.81E-02 |
| KEGG_FOCAL_ADHESION                                                 | 1.82E-02 |

|                                                                            |          |
|----------------------------------------------------------------------------|----------|
| GO_MEMBRANE_ASSEMBLY                                                       | 1.87E-02 |
| GO_CELLULAR_RESPONSE_TO_GROWTH_HORMONE_STIMULUS                            | 1.94E-02 |
| GO_REGULATION_OF_SENSORY_PERCEPTION                                        | 1.96E-02 |
| GO_REGULATION_OF_THE_FORCE_OF_HEART_CONTRACTION                            | 1.96E-02 |
| GO_REGULATION_OF_CYTOSKELETON_ORGANIZATION                                 | 1.96E-02 |
| GO_NEGATIVE_REGULATION_OF_PROTEIN_LOCALIZATION_TO_PLASMA_MEMBRANE          | 2.00E-02 |
| REACTOME_SIGNALING_BY_EGFR_IN_CANCER                                       | 2.00E-02 |
| GO_T_CELL_MIGRATION                                                        | 2.09E-02 |
| GO_NEGATIVE_REGULATION_OF_CD4_POSITIVE_ALPHA_BETA_T_CELL_ACTIVATION        | 2.10E-02 |
| REACTOME_HEMOSTASIS                                                        | 2.11E-02 |
| GO_CYTOKINE_PRODUCTION_INVOLVED_IN_IMMUNE_RESPONSE                         | 2.17E-02 |
| KEGG_DILATED_CARDIOMYOPATHY                                                | 2.19E-02 |
| GO_POSITIVE_REGULATION_OF_INFLAMMATORY_RESPONSE                            | 2.19E-02 |
| GO_LAMELLIPODIUM_ORGANIZATION                                              | 2.26E-02 |
| GO_PLACENTA_BLOOD_VESSEL_DEVELOPMENT                                       | 2.27E-02 |
| REACTOME_SIGNALING_BY_ROBO_RECEPTOR                                        | 2.27E-02 |
| HALLMARK_IL6_JAK_STAT3_SIGNALING                                           | 2.27E-02 |
| PID_ERBB2_ERBB3_PATHWAY                                                    | 2.28E-02 |
| GO_POSITIVE_REGULATION_OF_FAT_CELL_DIFFERENTIATION                         | 2.30E-02 |
| KEGG_CHRONIC_MYELOID_LEUKEMIA                                              | 2.31E-02 |
| PID_ALK1_PATHWAY                                                           | 2.31E-02 |
| GO_PROXIMAL_DISTAL_PATTERN_FORMATION                                       | 2.32E-02 |
| GO_COATED_VESICLE_MEMBRANE                                                 | 2.33E-02 |
| GO_COATED_VESICLE                                                          | 2.33E-02 |
| KEGG_HYPERTROPHIC_CARDIOMYOPATHY_HCM                                       | 2.33E-02 |
| REACTOME_SEMA3A_PLEXIN_REPULSION_SIGNALING_BY_INHIBITING_INTEGRIN_ADHESION | 2.33E-02 |
| GO_JAK_STAT_CASCADE_INVOLVED_IN_GROWTH_HORMONE_SIGNALING_PATHWAY           | 2.35E-02 |
| ST_INTEGRIN_SIGNALING_PATHWAY                                              | 2.35E-02 |
| GO_CELLULAR_RESPONSE_TO_PROSTAGLANDIN_E_STIMULUS                           | 2.35E-02 |
| GO_GTPASE_ACTIVITY                                                         | 2.36E-02 |
| GO_ENDOTHELIUM_DEVELOPMENT                                                 | 2.36E-02 |
| GO_RETINA_VASCULATURE_DEVELOPMENT_IN_CAMERA_TYPE_EYE                       | 2.37E-02 |
| GO_PHOSPHOLIPID_TRANSPORTER_ACTIVITY                                       | 2.38E-02 |
| REACTOME_MAPK_TARGETS_NUCLEAR_EVENTS_MEDIATED_BY_MAP_KINASES               | 2.38E-02 |
| GO_RUFFLE                                                                  | 2.42E-02 |
| BIOCARTA_CDC42RAC_PATHWAY                                                  | 2.43E-02 |
| GO_REGULATION_OF_ERK1_AND_ERK2_CASCADE                                     | 2.44E-02 |
| REACTOME_MEMBRANE_TRAFFICKING                                              | 2.45E-02 |
| GO_REGULATION_OF_DNA_TEMPLATED_TRANSCRIPTION_IN_RESPONSE_TO_STRESS         | 2.49E-02 |
| REACTOME_CLASS_B_2_SECRETIN_FAMILY_RECEPTORS                               | 2.50E-02 |
| GO_MYELOID_LEUKOCYTE_ACTIVATION                                            | 2.59E-02 |
| GO_ENDOMEMBRANE_SYSTEM_ORGANIZATION                                        | 2.60E-02 |
| BIOCARTA_MPR_PATHWAY                                                       | 2.60E-02 |

|                                                                          |          |
|--------------------------------------------------------------------------|----------|
| GO_ENDOCYTIC_VESICLE                                                     | 2.64E-02 |
| GO_REGULATION_OF_ERBB_SIGNALING_PATHWAY                                  | 2.74E-02 |
| PID_IL5_PATHWAY                                                          | 2.77E-02 |
| GO_NEGATIVE_REGULATION_OF_ORGAN_GROWTH                                   | 2.94E-02 |
| GO_ENDOTHELIAL_CELL_DIFFERENTIATION                                      | 2.94E-02 |
| PID_IL3_PATHWAY                                                          | 2.98E-02 |
| KEGG_RENAL_CELL_CARCINOMA                                                | 2.99E-02 |
| GO_RECYCLING_ENDOSOME                                                    | 2.99E-02 |
| REACTOME_SEMA3A_PAK_DEPENDENT_AXON_REPULSION                             | 2.99E-02 |
| GO_CELLULAR_RESPONSE_TO_EXTERNAL_STIMULUS                                | 3.00E-02 |
| GO_CHEMOKINE_ACTIVITY                                                    | 3.00E-02 |
| REACTOME_REGULATION_OF_INSULIN_SECRETION                                 | 3.01E-02 |
| GO_CARDIAC_MUSCLE_TISSUE_DEVELOPMENT                                     | 3.03E-02 |
| GO_REGULATION_OF_ANATOMICAL_STRUCTURE_SIZE                               | 3.05E-02 |
| GO_POSITIVE_REGULATION_OF_CELL_MORPHOGENESIS_INVOLVED_IN_DIFFERENTIATION | 3.14E-02 |
| GO_CELLULAR_RESPONSE_TO_FLUID_SHEAR_STRESS                               | 3.14E-02 |
| GO_CELLULAR_RESPONSE_TO_GLUCAGON_STIMULUS                                | 3.16E-02 |
| GO_MACROPHAGE_ACTIVATION                                                 | 3.16E-02 |
| GO_REGULATION_OF_SENSORY_PERCEPTION_OF_PAIN                              | 3.17E-02 |
| GO_REGULATION_OF_RECEPTOR_MEDIATED_ENDOCYTOSIS                           | 3.18E-02 |
| GO_NEGATIVE_REGULATION_OF_ADAPTIVE_IMMUNE_RESPONSE                       | 3.19E-02 |
| GO_FC_RECEPTOR_SIGNALING_PATHWAY                                         | 3.20E-02 |
| GO_POSITIVE_REGULATION_OF_PEPTIDYL_TYROSINE_PHOSPHORYLATION              | 3.20E-02 |
| GO_NEGATIVE_REGULATION_OF_ALPHA_BETA_T_CELL_DIFFERENTIATION              | 3.20E-02 |
| PID_IL8_CXCR2_PATHWAY                                                    | 3.20E-02 |
| GO_REGULATION_OF_OSSIFICATION                                            | 3.21E-02 |
| GO_REGULATION_OF_TYROSINE_PHOSPHORYLATION_OF_STAT_PROTEIN                | 3.21E-02 |
| KEGG_MELANOGENESIS                                                       | 3.21E-02 |
| GO_REGULATION_OF_EPITHELIAL_TO_MESENCHYMAL_TRANSITION                    | 3.21E-02 |
| REACTOME_SEMA4D_IN_SEMAPHORIN_SIGNALING                                  | 3.21E-02 |
| GO_IMMUNOGLOBULIN_BINDING                                                | 3.22E-02 |
| GO_RAS_PROTEIN_SIGNAL_TRANSDUCTION                                       | 3.25E-02 |
| PID_ATF2_PATHWAY                                                         | 3.27E-02 |
| GO_NEGATIVE_REGULATION_OF_ACTIN_FILAMENT_POLYMERIZATION                  | 3.28E-02 |
| PID_ER_NONGENOMIC_PATHWAY                                                | 3.31E-02 |
| GO_ENDOLYSOSOME                                                          | 3.33E-02 |
| PID_IL2_1PATHWAY                                                         | 3.34E-02 |
| GO_ACTIN_BINDING                                                         | 3.34E-02 |
| GO_IN_UTERO_EMBRYONIC_DEVELOPMENT                                        | 3.34E-02 |
| GO_RAC_PROTEIN_SIGNAL_TRANSDUCTION                                       | 3.35E-02 |
| GO_NEGATIVE_REGULATION_OF_LEUKOCYTE_DIFFERENTIATION                      | 3.35E-02 |
| HALLMARK_HYPOXIA                                                         | 3.35E-02 |
| GO_REGULATION_OF_WNT_SIGNALING_PATHWAY_PLANAR_CELL_POLARITY_PATHWAY      | 3.35E-02 |

|                                                                         |          |
|-------------------------------------------------------------------------|----------|
| REACTOME_ERK_MAPK_TARGETS                                               | 3.36E-02 |
| HALLMARK_ANDROGEN_RESPONSE                                              | 3.36E-02 |
| PID_ERBB1_INTERNALIZATION_PATHWAY                                       | 3.36E-02 |
| GO_LEUKOCYTE_DEGRANULATION                                              | 3.37E-02 |
| GO_GDP_BINDING                                                          | 3.37E-02 |
| REACTOME_GAP_JUNCTION_DEGRADATION                                       | 3.37E-02 |
| REACTOME_PREFOLDIN_MEDIATED_TRANSFER_OF_SUBSTRATE_TO_CCT_TRIC           | 3.38E-02 |
| REACTOME_RETROGRADE_NEUROTROPHIN_SIGNALLING                             | 3.38E-02 |
| GO_POSITIVE_REGULATION_OF_ATPASE_ACTIVITY                               | 3.39E-02 |
| GO_REGULATION_OF_TRANSMEMBRANE_RECEPTOR_PROTEIN_SERINE_THREONINE_KINASE | 3.46E-02 |
| GO_ASTROCYTE_DEVELOPMENT                                                | 3.46E-02 |
| GO_PHOSPHATASE_COMPLEX                                                  | 3.46E-02 |
| GO_RUFFLE_ORGANIZATION                                                  | 3.46E-02 |
| GO_EXTRINSIC_COMPONENT_OF_CYTOPLASMIC_SIDE_OF_PLASMA_MEMBRANE           | 3.49E-02 |
| GO_ACTIN_FILAMENT_BINDING                                               | 3.49E-02 |
| GO_VASCULOGENESIS                                                       | 3.50E-02 |
| REACTOME_ERKS_ARE_INACTIVATED                                           | 3.50E-02 |
| PID_PTP1B_PATHWAY                                                       | 3.53E-02 |
| PID_ARF_3PATHWAY                                                        | 3.53E-02 |
| REACTOME_THROMBOXANE_SIGNALLING_THROUGH_TP_RECEPTOR                     | 3.54E-02 |
| GO_CELL_DIFFERENTIATION_INVOLVED_IN_EMBRYONIC_PLACENTA_DEVELOPMENT      | 3.56E-02 |
| GO_ASTROCYTE_DIFFERENTIATION                                            | 3.57E-02 |
| GO_EPIDERMAL_GROWTH_FACTOR_RECEPTOR_SIGNALING_PATHWAY                   | 3.57E-02 |
| GO_REGULATION_OF_COAGULATION                                            | 3.58E-02 |
| GO_LAMELLIPODIUM_ASSEMBLY                                               | 3.58E-02 |
| REACTOME_AQUAPORIN_MEDIATED_TRANSPORT                                   | 3.59E-02 |
| GO_DIVALENT_INORGANIC_CATION_HOMEOSTASIS                                | 3.70E-02 |
| GO_PLATELET_ACTIVATION                                                  | 3.71E-02 |
| PID_NFAT_3PATHWAY                                                       | 3.72E-02 |
| GO_INFLAMMATORY_RESPONSE                                                | 3.73E-02 |
| GO_CELL_SUBSTRATE_ADHESION                                              | 3.76E-02 |
| GO_REGULATION_OF_TRANSCRIPTION_RNA_POLYMERASE_II_IN_RESPONSE_TO_STRESS  | 3.79E-02 |
| GO_NEGATIVE_REGULATION_OF_CELL_CELL_ADHESION                            | 3.80E-02 |
| GO TRABECULA MORPHOGENESIS                                              | 3.80E-02 |
| KEGG_FC_GAMMA_R_MEDIATED_PHAGOCYTOSIS                                   | 3.80E-02 |
| GO_NEGATIVE_REGULATION_OF_MYELOID_LEUKOCYTE_DIFFERENTIATION             | 3.80E-02 |
| GO_POSITIVE_REGULATION_OF_WOUND_HEALING                                 | 3.80E-02 |
| WNT_SIGNALING                                                           | 3.80E-02 |
| GO_EXTRACELLULAR_MATRIX_ASSEMBLY                                        | 3.81E-02 |
| BIOCARTA_INTEGRIN_PATHWAY                                               | 3.81E-02 |
| GO_ACTIN_CYTOSKELETON                                                   | 3.81E-02 |
| REACTOME_G_ALPHA1213_SIGNALLING_EVENTS                                  | 3.81E-02 |
| KEGG_MAPK_SIGNALING_PATHWAY                                             | 3.81E-02 |

|                                                                          |          |
|--------------------------------------------------------------------------|----------|
| GO_ACTIN_MONOMER_BINDING                                                 | 3.82E-02 |
| GO_DECIDUALIZATION                                                       | 3.82E-02 |
| PID_THROMBIN_PAR4_PATHWAY                                                | 3.82E-02 |
| PID_AVB3_OPN_PATHWAY                                                     | 3.82E-02 |
| BIOCARTA_TFF_PATHWAY                                                     | 3.82E-02 |
| GO_PITUITARY_GLAND_DEVELOPMENT                                           | 3.82E-02 |
| GO_LEADING_EDGE_MEMBRANE                                                 | 3.83E-02 |
| PID_ERBB1_DOWNSTREAM_PATHWAY                                             | 3.83E-02 |
| KEGG_AXON_GUIDANCE                                                       | 3.84E-02 |
| REACTOME_EGFR_DOWNREGULATION                                             | 3.85E-02 |
| SIG_REGULATION_OF_THE_ACTIN_CYTOSKELETON_BY_RHO_GTPASES                  | 3.85E-02 |
| GO_MAP_KINASE_ACTIVITY                                                   | 3.85E-02 |
| GO_NEGATIVE_REGULATION_OF_CD4_POSITIVE_ALPHA_BETA_T_CELL_DIFFERENTIATION | 3.87E-02 |
| GO_PROTEIN_PHOSPHATASE_TYPE_2A_COMPLEX                                   | 3.89E-02 |
| PID_IGF1_PATHWAY                                                         | 3.90E-02 |
| PID_TCR_CALCIIUM_PATHWAY                                                 | 3.94E-02 |
| GO_POSITIVE_REGULATION_OF_INTERLEUKIN_1_PRODUCTION                       | 3.95E-02 |
| GO_POSITIVE_REGULATION_OF_MACROPHAGE_ACTIVATION                          | 3.98E-02 |
| GO_REGULATION_OF_PLASMA_MEMBRANE_ORGANIZATION                            | 3.98E-02 |
| GO_MICROTUBULE_BASED_PROCESS                                             | 3.99E-02 |
| GO_POSITIVE_REGULATION_OF_VACUOLE_ORGANIZATION                           | 3.99E-02 |
| GO_REGULATION_OF_MAST_CELL_ACTIVATION                                    | 3.99E-02 |
| GOREGULATION_OF_TRANSMEMBRANE_RECEPTOR_PROTEIN_SERINE_THREONINE_KINASE   | 4.00E-02 |
| GO_REGULATION_OF_AXONOGENESIS                                            | 4.02E-02 |
| KEGG_ERBB_SIGNALING_PATHWAY                                              | 4.06E-02 |
| GO_ACUTE_PHASE_RESPONSE                                                  | 4.06E-02 |
| GO_POSITIVE_REGULATION_OF_LOCOMOTION                                     | 4.07E-02 |
| PID_TRKR_PATHWAY                                                         | 4.08E-02 |
| PID_S1P_S1P2_PATHWAY                                                     | 4.09E-02 |
| BIOCARTA_CARDIACEGF_PATHWAY                                              | 4.09E-02 |
| GO_ENDOPLASMIC_RETICULUM_SUBCOMPARTMENT                                  | 4.10E-02 |
| KEGG_ARRHYTHMOGENIC_RIGHT_VENTRICULAR_CARDIOMYOPATHY_ARVC                | 4.14E-02 |
| GO_MICROVILLUS_MEMBRANE                                                  | 4.15E-02 |
| BIOCARTA_CHREBP2_PATHWAY                                                 | 4.16E-02 |
| GO_RECEPTOR_COMPLEX                                                      | 4.16E-02 |
| REACTOME_SIGNALLING_BY_NGF                                               | 4.17E-02 |
| GO_PLASMA_MEMBRANE_RAFT                                                  | 4.17E-02 |
| GO_G_PROTEIN_COUPLED_RECEPTOR_BINDING                                    | 4.18E-02 |
| GO_BARBED_END_ACTIN_FILAMENT_CAPPING                                     | 4.19E-02 |
| REACTOME_SHC_MEDIATED_SIGNALLING                                         | 4.20E-02 |
| PID_S1P_S1P1_PATHWAY                                                     | 4.20E-02 |
| REACTOME_RECYCLING_PATHWAY_OF_L1                                         | 4.21E-02 |
| BIOCARTA_CFTR_PATHWAY                                                    | 4.23E-02 |

|                                                                  |          |
|------------------------------------------------------------------|----------|
| GO_CELLULAR_RESPONSE_TO_STARVATION                               | 4.23E-02 |
| BIOCARTA_BLYMPHOCYTE_PATHWAY                                     | 4.24E-02 |
| GO_NEURON_PROJECTION_GUIDANCE                                    | 4.25E-02 |
| GO_TRANSITION_METAL_ION_HOMEOSTASIS                              | 4.25E-02 |
| GO_RESPONSE_TO_INTERLEUKIN_1                                     | 4.25E-02 |
| GO_VASCULAR_ENDOTHELIAL_GROWTH_FACTOR_RECEPTOR_SIGNALING_PATHWAY | 4.25E-02 |
| GO_DERMATAN_SULFATE_METABOLIC_PROCESS                            | 4.26E-02 |
| GO_PLACENTA_DEVELOPMENT                                          | 4.26E-02 |
| GO_POSITIVE_REGULATION_OF_RESPONSE_TO_NUTRIENT_LEVELS            | 4.27E-02 |
| GO_MRNA_TRANSCRIPTION_FROM_RNA_POLYMERASE_II_PROMOTER            | 4.28E-02 |
| GO_NEGATIVE_REGULATION_OF_NEUROTRANSMITTER_SECRETION             | 4.28E-02 |
| GO_NEGATIVE_REGULATION_OF_LOCOMOTION                             | 4.29E-02 |
| HALLMARK_COMPLEMENT                                              | 4.29E-02 |
| GO_RUFFLE_MEMBRANE                                               | 4.35E-02 |
| GO_NEGATIVE_REGULATION_OF_OSSIFICATION                           | 4.36E-02 |
| GO_REGULATION_OF_PROTEIN_POLYMERIZATION                          | 4.36E-02 |
| GO_REGULATION_OF_CYTOPLASMIC_TRANSPORT                           | 4.36E-02 |
| GO_BRANCHING_INVOLVED_IN_LABYRINTHINE_LAYER_MORPHOGENESIS        | 4.36E-02 |
| GO_PODOSOME                                                      | 4.37E-02 |
| HALLMARK_UV_RESPONSE_DN                                          | 4.37E-02 |
| GO_REGULATION_OF_CHEMOTAXIS                                      | 4.37E-02 |
| GO_REGULATION_OF_NEUROTRANSMITTER_SECRETION                      | 4.38E-02 |
| GO_REGULATION_OF_CELL_MORPHOGENESIS_INVOLVED_IN_DIFFERENTIATION  | 4.38E-02 |
| GO_POLYOL_CATABOLIC_PROCESS                                      | 4.38E-02 |
| GO_CALCIIUM_ION_TRANSPORT                                        | 4.38E-02 |
| REACTOME_SIGNAL_AMPLIFICATION                                    | 4.38E-02 |
| GO_REGULATION_OF_DEVELOPMENTAL_GROWTH                            | 4.39E-02 |
| GO_ENDOCARDIUM_DEVELOPMENT                                       | 4.39E-02 |
| ST_ERK1_ERK2_MAPK_PATHWAY                                        | 4.39E-02 |
| GO_ACTIVIN_BINDING                                               | 4.39E-02 |
| GO_RESPONSE_TO_STARVATION                                        | 4.43E-02 |
| GO_SCAVENGER_RECEPTOR_ACTIVITY                                   | 4.43E-02 |
| BIOCARTA_CSK_PATHWAY                                             | 4.44E-02 |
| GO_NEGATIVE_REGULATION_OF_REGULATED_SECRETORY_PATHWAY            | 4.46E-02 |
| GO_NEGATIVE_REGULATION_OF_BIOMINERAL_TISSUE_DEVELOPMENT          | 4.54E-02 |
| GO_REGULATION_OF_MUSCLE_ORGAN_DEVELOPMENT                        | 4.55E-02 |
| REACTOME_GLUUCAGON_SIGNALING_IN_METABOLIC_REGULATION             | 4.55E-02 |
| SA_TRKA_RECEPTOR                                                 | 4.61E-02 |
| PID_TCR_PATHWAY                                                  | 4.63E-02 |
| REACTOME_REGULATION_OF_SIGNALING_BY_CBL                          | 4.64E-02 |
| GO_DERMATAN_SULFATE_PROTEOGLYCAN_METABOLIC_PROCESS               | 4.64E-02 |
| GO_ADRENERGIC_RECEPTOR_SIGNALING_PATHWAY                         | 4.65E-02 |
| HALLMARK_PI3K_AKT_MTOR_SIGNALING                                 | 4.65E-02 |

|                                                                      |          |
|----------------------------------------------------------------------|----------|
| PID_INTEGRIN1_PATHWAY                                                | 4.65E-02 |
| GO_CELLULAR_RESPONSE_TO_MECHANICAL_STIMULUS                          | 4.65E-02 |
| GO_REGULATION_OF_EARLY_ENDOSOME_TO_LATE_ENDOSOME_TRANSPORT           | 4.71E-02 |
| GO_REGULATION_OF_ACTIVIN_RECEPTOR_SIGNALING_PATHWAY                  | 4.72E-02 |
| REACTOME_GAP_JUNCTION_TRAFFICKING                                    | 4.72E-02 |
| GO_ACTIN_FILAMENT_BUNDLE                                             | 4.73E-02 |
| GO_REGULATION_OF_RESPONSE_TO_EXTRACELLULAR_STIMULUS                  | 4.77E-02 |
| GO_SENSORY_PERCEPTION_OF_PAIN                                        | 4.77E-02 |
| GO_NEGATIVE_REGULATION_OF_EXOCYTOSIS                                 | 4.79E-02 |
| GO_POSITIVE_REGULATION_OF_STRIATED_MUSCLE_CELL_DIFFERENTIATION       | 4.81E-02 |
| GO_MYELOID_CELL_ACTIVATION_INVOLVED_IN_IMMUNE_RESPONSE               | 4.82E-02 |
| GO_REGULATION_OF_GOLGI_ORGANIZATION                                  | 4.82E-02 |
| GO_REGULATION_OF_TYROSINE_PHOSPHORYLATION_OF_STATS5_PROTEIN          | 4.83E-02 |
| GO_PHOSPHOLIPID_TRANSPORT                                            | 4.83E-02 |
| REACTOME_GOLGI_ASSOCIATED_VESICLE_BIOGENESIS                         | 4.84E-02 |
| REACTOME_CRMP5_IN_SEMA3A_SIGNALING                                   | 4.85E-02 |
| GO_CARDIAC_CELL_DEVELOPMENT                                          | 4.88E-02 |
| GO_REGULATION_OF_VASCULAR_ENDOTHELIAL_GROWTH_FACTOR_RECEPTOR_PATHWAY | 4.89E-02 |
| GO_ADIPOSE_TISSUE_DEVELOPMENT                                        | 4.91E-02 |
| HALLMARK_IL2_STATS5_SIGNALING                                        | 4.92E-02 |
| GO_POSITIVE_REGULATION_OF_KINASE_ACTIVITY                            | 4.97E-02 |

### Down-regulated in response to IL10

| Gene Set Name                                              | FDR      |
|------------------------------------------------------------|----------|
| GO_RIBOSOME                                                | 0.00E+00 |
| GO_RIBOSOMAL_SUBUNIT                                       | 0.00E+00 |
| GO_CYTOSOLIC_RIBOSOME                                      | 0.00E+00 |
| GO_STRUCTURAL_CONSTITUENT_OF_RIBOSOME                      | 0.00E+00 |
| GO_TRANSLATIONAL_TERMINATION                               | 0.00E+00 |
| KEGG_RIBOSOME                                              | 0.00E+00 |
| GO_LARGE_RIBOSOMAL_SUBUNIT                                 | 0.00E+00 |
| REACTOME_PEPTIDE_CHAIN_ELONGATION                          | 0.00E+00 |
| GO_RIBOSOME_BIOGENESIS                                     | 0.00E+00 |
| GO_MITOCHONDRIAL_TRANSLATION                               | 0.00E+00 |
| GO_SMALL_RIBOSOMAL_SUBUNIT                                 | 0.00E+00 |
| REACTOME_3_UTR_MEDIATED_TRANSLATIONAL_REGULATION           | 0.00E+00 |
| GO_RRNA_METABOLIC_PROCESS                                  | 0.00E+00 |
| REACTOME_INFLUENZA_VIRAL_RNA_TRANSCRIPTION_AND_REPLICATION | 0.00E+00 |
| GO_ORGANELLAR_RIBOSOME                                     | 0.00E+00 |
| GO_RESPONSE_TO_TYPE_I_INTERFERON                           | 0.00E+00 |
| REACTOME_TRANSLATION                                       | 0.00E+00 |
| GO_CYTOSOLIC_LARGE_RIBOSOMAL_SUBUNIT                       | 0.00E+00 |

|                                                                                |          |
|--------------------------------------------------------------------------------|----------|
| GO_MULTI_ORGANISM_METABOLIC_PROCESS                                            | 0.00E+00 |
| REACTOME_SRP_DEPENDENT_COTRANSLATIONAL_PROTEIN_TARGETING_TO_MEMBRANE           | 0.00E+00 |
| REACTOME_NONSENSE_MEDIATED_DECAY_ENHANCED_BY_THE_EXON_JUNCTION_COMPLEX         | 0.00E+00 |
| GO_RIBOSOMAL_LARGE_SUBUNIT_BIOGENESIS                                          | 0.00E+00 |
| GO_RIBOSOME_ASSEMBLY                                                           | 0.00E+00 |
| GO_RIBONUCLEOPROTEIN_COMPLEX_BIOGENESIS                                        | 0.00E+00 |
| GO_NUCLEAR_TRANSCRIBED_MRNA_CATABOLIC_PROCESS_NONSENSE_MEDIATED_DECAY          | 0.00E+00 |
| REACTOME_RESPIRATORY_ELECTRON_TRANSPORT                                        | 0.00E+00 |
| GO_CELLULAR_PROTEIN_COMPLEX_DISASSEMBLY                                        | 0.00E+00 |
| GO_MITOCHONDRIAL_PROTEIN_COMPLEX                                               | 0.00E+00 |
| GO_TRANSLATIONAL_ELONGATION                                                    | 0.00E+00 |
| GO_ESTABLISHMENT_OF_PROTEIN_LOCALIZATION_TO_ENDOPLASMIC_RETICULUM              | 0.00E+00 |
| HALLMARK_INTERFERON_ALPHA_RESPONSE                                             | 0.00E+00 |
| GO_NEGATIVE_REGULATION_OF_VIRAL_GENOME_REPLICATION                             | 0.00E+00 |
| GO_ELECTRON_TRANSPORT_CHAIN                                                    | 0.00E+00 |
| GO_CYTOSOLIC_SMALL_RIBOSOMAL_SUBUNIT                                           | 0.00E+00 |
| GO_OXIDOREDUCTASE_ACTIVITY_ACTING_ON_NAD_P_H                                   | 0.00E+00 |
| GO_RESPIRATORY_CHAIN                                                           | 0.00E+00 |
| GO_TRANSLATIONAL_INITIATION                                                    | 0.00E+00 |
| GO_PROTEIN_LOCALIZATION_TO_ENDOPLASMIC_RETICULUM                               | 0.00E+00 |
| GO_NCRNA_PROCESSING                                                            | 0.00E+00 |
| GO_MITOCHONDRIAL_RESPIRATORY_CHAIN_COMPLEX_ASSEMBLY                            | 0.00E+00 |
| GO_OXIDATIVE_PHOSPHORYLATION                                                   | 0.00E+00 |
| REACTOME_ACTIVATION_OF_THE_MRNA_UPON_BINDING_OF_THE_CAP_BINDING_COMPLEX        | 0.00E+00 |
| GO_INNER_MITOCHONDRIAL_MEMBRANE_PROTEIN_COMPLEX                                | 0.00E+00 |
| REACTOME_FORMATION_OF_THE_TERNARY_COMPLEX_AND_SUBSEQUENTLY_THE_43S_COMPLEX     | 0.00E+00 |
| REACTOME_INFLUENZA_LIFE_CYCLE                                                  | 0.00E+00 |
| REACTOME_RESPIRATORY_ELECTRON_TRANSPORT_ATP_SYNTHESIS_BY_CHEMIOSMOTIC_COUPLING | 1.25E-05 |
| REACTOME_INTERFERON_ALPHA_BETA_SIGNALING                                       | 1.28E-05 |
| GO_RRNA_BINDING                                                                | 1.31E-05 |
| GO_CELLULAR_RESPIRATION                                                        | 1.34E-05 |
| GO_ORGANELLAR_LARGE_RIBOSOMAL_SUBUNIT                                          | 2.40E-05 |
| GO_RNA_CATABOLIC_PROCESS                                                       | 2.45E-05 |
| GO_OXIDOREDUCTASE_COMPLEX                                                      | 3.52E-05 |
| GO_MITOCHONDRIAL_MATRIX                                                        | 4.60E-05 |
| GO_DEFENSE_RESPONSE_TO_VIRUS                                                   | 6.78E-05 |
| GO_ORGANELLAR_SMALL_RIBOSOMAL_SUBUNIT                                          | 1.23E-04 |
| HALLMARK_OXIDATIVE_PHOSPHORYLATION                                             | 2.09E-04 |
| GO_NADH_DEHYDROGENASE_COMPLEX                                                  | 3.34E-04 |
| GO_AMIDE_BIOSYNTHETIC_PROCESS                                                  | 3.39E-04 |



|                                                                           |          |
|---------------------------------------------------------------------------|----------|
| GO_NUCLEOLAR_PART                                                         | 4.68E-04 |
| GO_NADH_DEHYDROGENASE_COMPLEX_ASSEMBLY                                    | 4.81E-04 |
| GO_OXIDOREDUCTASE_ACTIVITY_ACTING_ON_NAD_P_H_QUINONE_OR_SIMILAR_COMPOUND_ | 5.62E-04 |
| GO_MITOCHONDRIAL_MEMBRANE_PART                                            | 5.63E-04 |
| GO_MITOCHONDRIAL_RESPIRATORY_CHAIN_COMPLEX_I_ASSEMBLY                     | 6.03E-04 |
| GO_DNA_DAMAGE_RESPONSE_DETECTION_OF_DNA_DAMAGE                            | 7.17E-04 |
| KEGG_OXIDATIVE_PHOSPHORYLATION                                            | 8.91E-04 |
| GO_RNA_METHYLATION                                                        | 9.05E-04 |
| GO_RRNA_MODIFICATION                                                      | 9.05E-04 |
| GO_PRERIBOSOME_LARGE_SUBUNIT_PRECURSOR                                    | 9.33E-04 |
| GO_MITOCHONDRIAL_RESPIRATORY_CHAIN_COMPLEX_I_BIOGENESIS                   | 9.37E-04 |
| GO_RIBOSOMAL_LARGE_SUBUNIT_ASSEMBLY                                       | 1.14E-03 |
| GO_MITOCHONDRIAL_ELECTRON_TRANSPORT_NADH_TO_UBIQUINONE                    | 1.25E-03 |
| GO_RNA_METHYLTRANSFERASE_ACTIVITY                                         | 1.29E-03 |
| GO_RIBOSOMAL_SMALL_SUBUNIT_BIOGENESIS                                     | 1.57E-03 |
| GO_DEAMINASE_ACTIVITY                                                     | 1.59E-03 |
| KEGG_PARKINSONS_DISEASE                                                   | 1.61E-03 |
| REACTOME_TCA_CYCLE_AND_RESPIRATORY_ELECTRON_TRANSPORT                     | 1.81E-03 |
| GO_NEGATIVE_REGULATION_OF_VIRAL_PROCESS                                   | 1.92E-03 |
| GO_MITOCHONDRIAL_TRANSMEMBRANE_TRANSPORT                                  | 2.23E-03 |
| GO_ORGANIC_CYCLIC_COMPOUND_CATABOLIC_PROCESS                              | 2.40E-03 |
| GO_NADH_DEHYDROGENASE_ACTIVITY                                            | 2.42E-03 |
| REACTOME_METABOLISM_OF_RNA                                                | 2.89E-03 |
| KEGG_VALINE_LEUCINE_AND_ISOLEUCINE_DEGRADATION                            | 3.19E-03 |
| GO_OXIDOREDUCTASE_ACTIVITY_ACTING_ON_NAD_P_H_OXYGEN_AS_ACCEPTOR           | 4.11E-03 |
| GO_RIBOSOMAL_SMALL_SUBUNIT_ASSEMBLY                                       | 4.43E-03 |
| GO_REGULATION_OF_VIRAL_GENOME_REPLICATION                                 | 4.43E-03 |
| GO_TUMOR_NECROSIS_FACTOR_RECEPTOR_BINDING                                 | 5.48E-03 |
| REACTOME_METABOLISM_OF_MRNA                                               | 5.60E-03 |
| HALLMARK_DNA_REPAIR                                                       | 6.72E-03 |
| GO_PROTEIN_TARGETING_TO_MEMBRANE                                          | 7.02E-03 |
| GO_METANEPHRIC_MESENCHYME_DEVELOPMENT                                     | 7.27E-03 |
| GO_OXIDOREDUCTASE_ACTIVITY_ACTING_ON_PEROXIDE_AS_ACCEPTOR                 | 7.30E-03 |
| GO_RIBONUCLEOPROTEIN_COMPLEX_SUBUNIT_ORGANIZATION                         | 7.93E-03 |
| GO_SMALL_NUCLEOLAR_RIBONUCLEOPROTEIN_COMPLEX                              | 9.26E-03 |
| GO_RNA_MODIFICATION                                                       | 9.38E-03 |
| GO_SUPEROXIDE_GENERATING_NADPH_OXIDASE_ACTIVITY                           | 9.87E-03 |
| KEGG_RNA_POLYMERASE                                                       | 1.04E-02 |
| REACTOME_NFKB_IS_ACTIVATED_AND_SIGNALS_SURVIVAL                           | 1.04E-02 |
| GO_RRNA_METHYLATION                                                       | 1.10E-02 |

|                                                                    |          |
|--------------------------------------------------------------------|----------|
| GO_OXIDOREDUCTASE_ACTIVITY_ACTING_ON_A_HEME_GROUP_OF_DONORS        | 1.11E-02 |
| GO_AEROBIC_RESPIRATION                                             | 1.17E-02 |
| GO_RNA_POLYMERASE_ACTIVITY                                         | 1.37E-02 |
| GO_ENERGY_DERIVATION_BY_OXIDATION_OF_ORGANIC_COMPOUNDS             | 1.56E-02 |
| KEGG_DNA_REPLICATION                                               | 1.60E-02 |
| GO_RESPONSE_TO_VIRUS                                               | 1.61E-02 |
| GO_PRERIBOSOME                                                     | 1.61E-02 |
| GO_CYTOSOLIC_PART                                                  | 1.61E-02 |
| GO_KIDNEY_MESENCHYME_DEVELOPMENT                                   | 1.62E-02 |
| GO_MACROMOLECULAR_COMPLEX_DISASSEMBLY                              | 1.85E-02 |
| GO_DNA_DIRECTED_RNA_POLYMERASE_III_COMPLEX                         | 2.03E-02 |
| GO_ALDO_KETO_REDUCTASE_NADP_ACTIVITY                               | 2.06E-02 |
| REACTOME_FANCONI_ANEMIA_PATHWAY                                    | 2.20E-02 |
| GO_PROTON_TRANSPORTING_ATP_SYNTHASE_COMPLEX                        | 2.25E-02 |
| GO_4_IRON_4_SULFUR_CLUSTER_BINDING                                 | 2.54E-02 |
| GO_MHC_PROTEIN_COMPLEX                                             | 2.83E-02 |
| KEGG_BUTANOATE_METABOLISM                                          | 2.83E-02 |
| REACTOME_RNA_POL_III_TRANSCRIPTION_TERMINATION                     | 2.97E-02 |
| REACTOME_DNA_REPAIR                                                | 3.05E-02 |
| GO_DEOXYRIBONUCLEOTIDE_BIOSYNTHETIC_PROCESS                        | 3.49E-02 |
| REACTOME_RNA_POL_III_CHAIN_ELONGATION                              | 3.77E-02 |
| REACTOME_ANTIVIRAL_MECHANISM_BY_IFN_STIMULATED_GENES               | 3.90E-02 |
| GO_MITOCHONDRION_DISTRIBUTION                                      | 3.90E-02 |
| REACTOME_MRNA_SPLICING_MINOR_PATHWAY                               | 3.91E-02 |
| REACTOME_RNA_POL_III_TRANSCRIPTION_INITIATION_FROM_TYPE_2_PROMOTER | 3.95E-02 |
| GO_CYTOCHROME_COMPLEX_ASSEMBLY                                     | 4.01E-02 |
| GO_DEOXYRIBONUCLEOSIDE_TRIPHOSPHATE_METABOLIC_PROCESS              | 4.17E-02 |
| GO_MITOCHONDRIAL_ATP_SYNTHESIS_COUPLED_PROTON_TRANSPORT            | 4.25E-02 |
| GO_RNA_POLYMERASE_III_ACTIVITY                                     | 4.47E-02 |
| GO_SNORNA_BINDING                                                  | 4.48E-02 |
| GO_CYTOPLASMIC_TRANSLATION                                         | 4.96E-02 |
| GO_GLUTATHIONE_PEROXIDASE_ACTIVITY                                 | 4.99E-02 |

## Up-regulated in response to IL4

| Gene Set Name                                                                      | FDR      |
|------------------------------------------------------------------------------------|----------|
| HALLMARK_MYC_TARGETS_V1                                                            | 0.00E+00 |
| GO_PRERIBOSOME                                                                     | 0.00E+00 |
| GO_MONOCYTE_CHEMOTAXIS                                                             | 0.00E+00 |
| GO_RIBOSOME_BIOGENESIS                                                             | 0.00E+00 |
| GO_LYMPHOCYTE_CHEMOTAXIS                                                           | 1.85E-04 |
| HALLMARK_MYC_TARGETS_V2                                                            | 2.22E-04 |
| GO_RIBONUCLEOPROTEIN_COMPLEX_BIOGENESIS                                            | 2.75E-04 |
| GO_LYMPHOCYTE_MIGRATION                                                            | 3.15E-04 |
| GO_CCR_CHEMOKINE_RECEPTOR_BINDING                                                  | 4.91E-04 |
| HALLMARK_OXIDATIVE_PHOSPHORYLATION                                                 | 6.60E-04 |
| GO_NCRNA_PROCESSING                                                                | 1.10E-03 |
| GO_RRNA_METABOLIC_PROCESS                                                          | 2.87E-03 |
| GO_PROTEIN_TARGETING_TO_MITOCHONDRION                                              | 3.17E-03 |
| GO_POSITIVE_REGULATION_OF_FIBROBLAST_PROLIFERATION                                 | 3.24E-03 |
| REACTOME_FORMATION_OF_TUBULIN_FOLDING_INTERMEDIATES_BY_CCT_TRIC                    | 8.68E-03 |
| GO_MITOCHONDRIAL_TRANSLATION                                                       | 1.30E-02 |
| REACTOME_MITOCHONDRIAL_PROTEIN_IMPORT                                              | 1.35E-02 |
| GO_ANTIGEN_BINDING                                                                 | 1.37E-02 |
| GO_RENAL_SYSTEM_PROCESS_INVOLVED_IN_REGULATION_OF_SYSTEMIC_ARTERIAL_BLOOD_PRESSURE | 1.91E-02 |
| GO_MATURATION_OF_5_8S_RRNA                                                         | 2.02E-02 |
| GO_GAS_TRANSPORT                                                                   | 2.11E-02 |
| GO_POSITIVE_REGULATION_OF_ERK1_AND_ERK2_CASCADE                                    | 2.19E-02 |
| GO_RIBOSOMAL_LARGE_SUBUNIT_BIOGENESIS                                              | 2.20E-02 |
| REACTOME_DESTABILIZATION_OF_MRNA_BY_AUF1_HNRNP_DO                                  | 2.39E-02 |
| REACTOME_PREFOLDIN_MEDIATED_TRANSFER_OF_SUBSTRATE_TO_CCT_TRIC                      | 2.40E-02 |
| GO_TRNA_METABOLIC_PROCESS                                                          | 2.41E-02 |
| GO_MHC_CLASS_II_PROTEIN_COMPLEX                                                    | 2.55E-02 |
| GO_NEGATIVE_REGULATION_OF_INTERFERON_GAMMA_PRODUCTION                              | 2.92E-02 |
| GO_CHEMOKINE_ACTIVITY                                                              | 2.96E-02 |
| GO_NUCLEOID                                                                        | 2.99E-02 |
| GO_NEGATIVE_REGULATION_OF_EPITHELIAL_CELL_APOPTOTIC_PROCESS                        | 3.34E-02 |
| GO_RIBONUCLEOPROTEIN_COMPLEX_BINDING                                               | 3.38E-02 |
| GO_MYELIN_SHEATH                                                                   | 3.42E-02 |
| GO_RIBOSOME_BINDING                                                                | 3.49E-02 |
| REACTOME_CYTOSOLIC_TRNA_AMINOACYLATION                                             | 3.55E-02 |
| KEGG_AMINOACYL_TRNA_BIOSYNTHESIS                                                   | 3.61E-02 |
| GO_CHEMOKINE_RECEPTOR_BINDING                                                      | 3.67E-02 |
| GO_PRERIBOSOME_LARGE_SUBUNIT_PRECURSOR                                             | 4.12E-02 |

|                                                  |          |
|--------------------------------------------------|----------|
| GO_NCRNA_3_END_PROCESSING                        | 4.14E-02 |
| REACTOME_SCFSKP2_MEDIATED_DEGRADATION_OF_P27_P21 | 4.14E-02 |
| GO_SMALL_SUBUNIT_PROCESSOME                      | 4.16E-02 |
| GO_TRANSLATIONAL_ELONGATION                      | 4.80E-02 |
| GO_CHEMOKINE_MEDIATED_SIGNALING_PATHWAY          | 4.91E-02 |
| REACTOME_POST_CHAPERONIN_TUBULIN_FOLDING_PATHWAY | 4.92E-02 |

### Down-regulated in response to IL4

| Gene Set Name                                                                  | FDR      |
|--------------------------------------------------------------------------------|----------|
| REACTOME_RNA_POL_I_PROMOTER_OPENING                                            | 0.00E+00 |
| REACTOME_PACKAGING_OF_TELOMERE_ENDS                                            | 1.34E-03 |
| GO_POSITIVE_REGULATION_OF_VASCULAR_ENDOTHELIAL_GROWTH_FACTOR_PRODUCTION        | 2.39E-03 |
| GO_DEFENSE_RESPONSE_TO_FUNGUS                                                  | 2.69E-03 |
| HALLMARK_INTERFERON_ALPHA_RESPONSE                                             | 3.06E-03 |
| GO_ANTIMICROBIAL_HUMORAL_RESPONSE                                              | 5.87E-03 |
| REACTOME_AMYLOIDS                                                              | 6.05E-03 |
| REACTOME_MEIOTIC_RECOMBINATION                                                 | 6.66E-03 |
| GO_RESPONSE_TO_ACIDIC_PH                                                       | 7.47E-03 |
| GO_DNA_PACKAGING_COMPLEX                                                       | 1.04E-02 |
| GO_REGULATION_OF_VASCULAR_ENDOTHELIAL_GROWTH_FACTOR_PRODUCTION                 | 1.05E-02 |
| GO_CELLULAR_RESPONSE_TO_ZINC_ION                                               | 1.08E-02 |
| PID_TOLL_ENDOGENOUS_PATHWAY                                                    | 1.89E-02 |
| GO_RESPONSE_TO_ZINC_ION                                                        | 2.31E-02 |
| REACTOME_GLYCOSPHINGOLIPID_METABOLISM                                          | 2.42E-02 |
| GO_GLYCOSPHINGOLIPID_METABOLIC_PROCESS                                         | 2.92E-02 |
| REACTOME_DEPOSITION_OF_NEW_CENPA_CONTAINING_NUCLEOSOMES_AT_THE_CENTROMERE      | 3.00E-02 |
| GO_SUPEROXIDE_GENERATING_NADPH_OXIDASE_ACTIVITY                                | 3.05E-02 |
| GO_INTERLEUKIN_1_PRODUCTION                                                    | 3.24E-02 |
| GO_NEGATIVE_REGULATION_OF_G_PROTEIN_COUPLED_RECEPTOR_PROTEIN_SIGNALING_PATHWAY | 3.25E-02 |
| GO_MYD88_DEPENDENT_TOLL_LIKE_RECEPTOR_SIGNALING_PATHWAY                        | 3.57E-02 |
| GO_NEGATIVE_REGULATION_OF_PROTEIN_OLIGOMERIZATION                              | 4.47E-02 |

### Up-regulated in response to AZM

---

| Gene Set Name                                         | FDR      |
|-------------------------------------------------------|----------|
| GO_STEROID_BIOSYNTHETIC_PROCESS                       | 0.00E+00 |
| GO_PIGMENT_GRANULE                                    | 0.00E+00 |
| GO_STEROL_BIOSYNTHETIC_PROCESS                        | 0.00E+00 |
| GO_FERRIC_IRON_TRANSPORT                              | 1.90E-04 |
| GO_PHAGOSOME_ACIDIFICATION                            | 2.10E-04 |
| HALLMARK_MTORC1_SIGNALING                             | 2.36E-04 |
| HALLMARK_CHOLESTEROL_HOMEOSTASIS                      | 2.37E-04 |
| REACTOME_CHOLESTEROL_BIOSYNTHESIS                     | 2.60E-04 |
| REACTOME_TRANSFERRIN_ENDOCYTOSIS_AND_RECYCLING        | 2.70E-04 |
| GO_PH_REDUCTION                                       | 2.86E-04 |
| GO_TRIVALENT_INORGANIC_CATION_TRANSPORT               | 3.15E-04 |
| GO_STEROL_METABOLIC_PROCESS                           | 1.10E-03 |
| REACTOME_INSULIN_RECEPTOR_RECYCLING                   | 1.74E-03 |
| HALLMARK_MYC_TARGETS_V2                               | 1.89E-03 |
| KEGG_STEROID_BIOSYNTHESIS                             | 3.09E-03 |
| GO_ALCOHOL_BIOSYNTHETIC_PROCESS                       | 4.32E-03 |
| HALLMARK_UNFOLDED_PROTEIN_RESPONSE                    | 5.73E-03 |
| REACTOME_IRON_UPTAKE_AND_TRANSPORT                    | 7.20E-03 |
| GO_PROTON_TRANSPORTING_V_TYPE_ATPASE_COMPLEX          | 8.47E-03 |
| GO_STEROID_METABOLIC_PROCESS                          | 3.30E-02 |
| GO_REGULATION_OF_CELLULAR_PH                          | 3.98E-02 |
| GO_INSULIN_RECEPTOR_SIGNALING_PATHWAY                 | 4.05E-02 |
| REACTOME_SIGNALING_BY_INSULIN_RECEPTOR                | 4.54E-02 |
| GO_VACUOLAR_PROTON_TRANSPORTING_V_TYPE_ATPASE_COMPLEX | 4.56E-02 |

### Down-regulated in response to AZM

---

| Gene Set Name                                  | FDR      |
|------------------------------------------------|----------|
| REACTOME_RNA_POL_I_PROMOTER_OPENING            | 0.00E+00 |
| KEGG_SYSTEMIC_LUPUS_ERYTHEMATOSUS              | 0.00E+00 |
| GO_CELLULAR_RESPONSE_TO_INTERFERON_GAMMA       | 0.00E+00 |
| REACTOME_PACKAGING_OF_TELOMERE_ENDS            | 0.00E+00 |
| REACTOME_AMYLOIDS                              | 2.11E-04 |
| REACTOME_TELOMERE_MAINTENANCE                  | 8.75E-04 |
| GO_NEGATIVE_REGULATION_OF_B_CELL_ACTIVATION    | 1.20E-03 |
| GO_INTERFERON_GAMMA_MEDIATED_SIGNALING_PATHWAY | 2.24E-03 |
| HALLMARK_ALLOGRAFT_REJECTION                   | 3.04E-03 |
| GO_DETECTION_OF_OTHER_ORGANISM                 | 3.57E-03 |

|                                                                                    |          |
|------------------------------------------------------------------------------------|----------|
| REACTOME_INTERFERON_GAMMA_SIGNALING                                                | 3.63E-03 |
| REACTOME_DEPOSITION_OF_NEW_CENPA_CONTAINING_NUCLEOSOMES_AT_THE_CENTROMERE          | 4.21E-03 |
| GO_MYELOID_LEUKOCYTE_MIGRATION                                                     | 4.21E-03 |
| GO_GRANULOCYTE_MIGRATION                                                           | 4.37E-03 |
| REACTOME_CITRIC_ACID_CYCLE_TCA_CYCLE                                               | 4.91E-03 |
| GO_CELL_CHEMOTAXIS                                                                 | 5.06E-03 |
| KEGG_RIBOSOME                                                                      | 6.50E-03 |
| GO_NEGATIVE_REGULATION_OF_ADAPTIVE_IMMUNE_RESPONSE                                 | 6.64E-03 |
| GO_POSITIVE_REGULATION_OF_INFLAMMATORY_RESPONSE                                    | 6.81E-03 |
| GO_CYTOSOLIC_SMALL_RIBOSOMAL_SUBUNIT                                               | 6.91E-03 |
| REACTOME_PEPTIDE_CHAIN_ELONGATION                                                  | 6.95E-03 |
| GO_INTERLEUKIN_1_PRODUCTION                                                        | 7.10E-03 |
| BIOCARTA_TH1TH2_PATHWAY                                                            | 7.18E-03 |
| GO_DETECTION_OF_BIOTIC_STIMULUS                                                    | 7.23E-03 |
| GO_RESPONSE_TO_INTERFERON_GAMMA                                                    | 7.78E-03 |
| KEGG_LEISHMANIA_INFECTION                                                          | 9.95E-03 |
| GO_LEUKOCYTE_MIGRATION                                                             | 1.33E-02 |
| GO_LEUKOCYTE_CHEMOTAXIS                                                            | 1.34E-02 |
| GO_CYTOKINE_PRODUCTION                                                             | 1.35E-02 |
| KEGG_TYPE_I_DIABETES_MELLITUS                                                      | 1.38E-02 |
| REACTOME_IMMUNOREGULATORY_INTERACTIONS_BETWEEN_A_LYMPHOID_AND_A_NON_LYMPHOID_CELL  | 1.41E-02 |
| GO_PEPTIDOGLYCAN_BINDING                                                           | 1.42E-02 |
| KEGG_ALLOGRAFT_REJECTION                                                           | 1.45E-02 |
| GO_IMMUNE_RESPONSE_REGULATING_CELL_SURFACE_RECEPTOR_SIGNALING_PATHWAY              | 1.56E-02 |
| GO_NEGATIVE_REGULATION_OF_LYMPHOCYTE_MEDIATED_IMMUNITY                             | 1.57E-02 |
| GO_REGULATION_OF_ERYTHROCYTE_DIFFERENTIATION                                       | 1.58E-02 |
| GO_E_BOX_BINDING                                                                   | 1.60E-02 |
| GO_REGULATION_OF_MACROPHAGE_DIFFERENTIATION                                        | 1.60E-02 |
| GO_HUMORAL_IMMUNE_RESPONSE                                                         | 1.60E-02 |
| KEGG_GRAFT_VERSUS_HOST_DISEASE                                                     | 1.64E-02 |
| GO_SCAVENGER_RECEPTOR_ACTIVITY                                                     | 1.66E-02 |
| GO_NUCLEAR_NUCLEOSOME                                                              | 1.67E-02 |
| GO_PHAGOCYTOSIS                                                                    | 1.68E-02 |
| KEGG_CELL_ADHESION_MOLECULES_CAMS                                                  | 1.70E-02 |
| GO_POSITIVE_REGULATION_OF_NUCLEAR_TRANSCRIBED_MRNA_CATABOLIC_PROCESS_DEADENYLATION | 1.71E-02 |
| GO_IMMUNE_EFFECTOR_PROCESS                                                         | 1.72E-02 |
| GO_DNA_REPLICATION_DEPENDENT_NUCLEOSOME_ASSEMBLY                                   | 1.72E-02 |
| GO_POSITIVE_REGULATION_OF_DEFENSE_RESPONSE                                         | 1.72E-02 |
| GO_CHROMATIN_SILENCING_AT_RDNA                                                     | 1.74E-02 |
| GO_REGULATION_OF_MRNA_CATABOLIC_PROCESS                                            | 1.84E-02 |

|                                                                            |          |
|----------------------------------------------------------------------------|----------|
| PID_RETINOIC_ACID_PATHWAY                                                  | 2.15E-02 |
| GO_ACTIVATION_OF_IMMUNE_RESPONSE                                           | 2.16E-02 |
| GO_PEPTIDE_ANTIGEN_BINDING                                                 | 2.16E-02 |
| GO_DNA_REPLICATION_DEPENDENT_NUCLEOSOME_ORGANIZATION                       | 2.17E-02 |
| GO_POSITIVE_REGULATION_OF_INTERFERON_GAMMA_PRODUCTION                      | 2.19E-02 |
| GO_REGULATION_OF_NUCLEAR_TRANSCRIBED_MRNA_CATABOLIC_PROCESS_DEADENYLATION  | 2.19E-02 |
| GO_REGULATION_OF_INTERFERON_GAMMA_PRODUCTION                               | 2.24E-02 |
| PID_IL12_STAT4_PATHWAY                                                     | 2.49E-02 |
| GO_ANTIMICROBIAL_HUMORAL_RESPONSE                                          | 2.51E-02 |
| REACTOME_FORMATION_OF_THE_TERNARY_COMPLEX_AND_SUBSEQUENTLY_THE_43S_COMPLEX | 2.52E-02 |
| HALLMARK_ANGIOGENESIS                                                      | 2.54E-02 |
| GO_NEGATIVE_REGULATION_OF_B_CELL_PROLIFERATION                             | 2.75E-02 |
| KEGG_VIRAL_MYOCARDITIS                                                     | 2.76E-02 |
| GO_REGULATION_OF_ENDOTHELIAL_CELL_DIFFERENTIATION                          | 2.90E-02 |
| GO_REGULATION_OF_INTERLEUKIN_2_BIOSYNTHETIC_PROCESS                        | 2.90E-02 |
| GO_PHAGOCYTOSIS_ENGULFMENT                                                 | 2.91E-02 |
| GO_REGULATION_OF_MYELOID_LEUKOCYTE_DIFFERENTIATION                         | 2.92E-02 |
| GO_IGG_BINDING                                                             | 3.11E-02 |
| GO_CYTOKINE_BINDING                                                        | 3.16E-02 |
| GO_REGULATION_OF_MYELOID_CELL_DIFFERENTIATION                              | 3.25E-02 |
| REACTOME_RNA_POL_I_TRANSCRIPTION                                           | 3.29E-02 |
| GO_POSITIVE_REGULATION_OF_BMP_SIGNALING_PATHWAY                            | 3.47E-02 |
| GO_PROTEIN_DNA_COMPLEX                                                     | 3.58E-02 |
| GO_MHC_PROTEIN_COMPLEX                                                     | 3.60E-02 |
| GO_NEGATIVE_REGULATION_OF_LEUKOCYTE_MEDIATED_IMMUNITY                      | 4.08E-02 |
| GO_MORPHOGENESIS_OF_AN_ENDOTHELIUM                                         | 4.18E-02 |
| REACTOME_TCA_CYCLE_AND_RESPIRATORY_ELECTRON_TRANSPORT                      | 4.65E-02 |
| GO_DNA_PACKAGING_COMPLEX                                                   | 4.68E-02 |
| BIOCARTA_TID_PATHWAY                                                       | 4.70E-02 |
| REACTOME_MEIOTIC_SYNAPSIS                                                  | 4.74E-02 |

### Up-regulated in response to MP

---

| Gene Set Name                                                                     | FDR      |
|-----------------------------------------------------------------------------------|----------|
| REACTOME_PEPTIDE_CHAIN_ELONGATION                                                 | 0.00E+00 |
| REACTOME_3_UTR_MEDIATED_TRANSLATIONAL_REGULATION                                  | 0.00E+00 |
| KEGG_RIBOSOME                                                                     | 0.00E+00 |
| GO_NUCLEAR_TRANSCRIBED_MRNA_CATABOLIC_PROCESS_NONSENSE_MEDIATED_DECAY             | 0.00E+00 |
| REACTOME_NONSENSE_MEDIATED_DECAY_ENHANCED_BY_THE_EXON_JUNCTION_COMPLEX            | 0.00E+00 |
| GO_CYTOSOLIC_RIBOSOME                                                             | 5.58E-04 |
| GO_TRANSLATIONAL_INITIATION                                                       | 5.96E-04 |
| REACTOME_INFLUENZA_VIRAL_RNA_TRANSCRIPTION_AND_REPLICATION                        | 7.30E-04 |
| REACTOME_ACTIVATION_OF_THE_MRNA_UPON_BINDING_OF_THE_CAP_BINDING_COMPLEX_AND_EIFS_ | 7.43E-04 |
| REACTOME_FORMATION_OF_THE_TERNARY_COMPLEX_AND_SUBSEQUENTLY_THE_43S_COMPLEX        | 9.21E-04 |
| GO_CYTOSOLIC_LARGE_RIBOSOMAL_SUBUNIT                                              | 1.97E-03 |
| GO_RNA_CATABOLIC_PROCESS                                                          | 4.73E-03 |
| GO_RIBOSOMAL_SUBUNIT                                                              | 4.68E-03 |
| GO_MULTI_ORGANISM_METABOLIC_PROCESS                                               | 7.57E-03 |
| GO_INNATE_IMMUNE_RESPONSE_IN_MUCOSA                                               | 1.36E-02 |
| GO_ANTIMICROBIAL_HUMORAL_RESPONSE                                                 | 1.46E-02 |
| GO_DEFENSE_RESPONSE_TO_GRAM_NEGATIVE_BACTERIUM                                    | 1.76E-02 |
| GO_LARGE_RIBOSOMAL_SUBUNIT                                                        | 1.90E-02 |
| GO_NEGATIVE_REGULATION_OF_LIPASE_ACTIVITY                                         | 1.94E-02 |
| REACTOME_SRP_DEPENDENT_COTRANSLATIONAL_PROTEIN_TARGETING_TO_MEMBRANE              | 2.13E-02 |
| REACTOME_TRANSLATION                                                              | 2.34E-02 |
| GO_CYTOSOLIC_SMALL_RIBOSOMAL_SUBUNIT                                              | 2.70E-02 |
| GO_OOCYTE_DIFFERENTIATION                                                         | 4.55E-02 |

### Down-regulated in response to MP

---

| Gene Set Name                                         | FDR      |
|-------------------------------------------------------|----------|
| GO_CHEMOKINE_ACTIVITY                                 | 0.00E+00 |
| GO_MONOCYTE_CHEMOTAXIS                                | 0.00E+00 |
| KEGG_ASTHMA                                           | 3.89E-04 |
| GO_CHEMOKINE_MEDIATED_SIGNALING_PATHWAY               | 6.63E-04 |
| GO_POSITIVE_REGULATION_OF_INFLAMMATORY_RESPONSE       | 7.24E-04 |
| GO GRANULOCYTE MIGRATION                              | 7.73E-04 |
| GO_MYELOID_LEUKOCYTE_MIGRATION                        | 8.67E-04 |
| REACTOME_CHEMOKINE_RECEPTORS_BIND_CHEMOKINES          | 9.28E-04 |
| GO_POSITIVE_REGULATION_OF_CALCIIUM_MEDIATED_SIGNALING | 1.27E-03 |
| GO_MONOSACCHARIDE_BIOSYNTHETIC_PROCESS                | 1.29E-03 |
| KEGG_VIRAL_MYOCARDITIS                                | 2.13E-03 |



|                                                                                     |          |
|-------------------------------------------------------------------------------------|----------|
| GO_CYTOKINE_ACTIVITY                                                                | 2.32E-03 |
| GO_RESPONSE_TO_TUMOR_NECROSIS_FACTOR                                                | 3.31E-03 |
| GO_LEUKOCYTE_MIGRATION                                                              | 3.32E-03 |
| GO_NEGATIVE_REGULATION_OF_VIRAL_PROCESS                                             | 4.12E-03 |
| GO_ANTIGEN_PROCESSING_AND_PRESENTATION_OF_EXOGENOUS_PEPTIDE_ANTIGEN_VIA_MHC_CLASS_I | 4.28E-03 |
| HALLMARK_MTORC1_SIGNALING                                                           | 4.29E-03 |
| GO_ANTIGEN_PROCESSING_AND_PRESENTATION                                              | 4.34E-03 |
| REACTOME_REGULATION_OF_ORNITHINE_DECARBOXYLASE_ODC                                  | 4.45E-03 |
| GO_LEUKOCYTE_CHEMOTAXIS                                                             | 4.58E-03 |
| GO_ANTIGEN_PROCESSING_AND_PRESENTATION_OF_PEPTIDE_ANTIGEN                           | 4.79E-03 |
| GO_ISOPRENOID_BIOSYNTHETIC_PROCESS                                                  | 4.81E-03 |
| REACTOME_CROSS_PRESENTATION_OF_SOLUBLE_EXOGENOUS_ANTIGENS_ENDOSOMES                 | 4.86E-03 |
| GO_POSITIVE_REGULATION_OF_DEFENSE_RESPONSE                                          | 4.95E-03 |
| GO_MHC_CLASS_II_PROTEIN_COMPLEX                                                     | 5.06E-03 |
| GO_CELLULAR_RESPONSE_TO_INTERFERON_GAMMA                                            | 5.94E-03 |
| GO_RESPONSE_TO_INTERFERON_GAMMA                                                     | 6.83E-03 |
| KEGG_GRAFT_VERSUS_HOST_DISEASE                                                      | 8.37E-03 |
| GO_LEUKOCYTE_DEGRANULATION                                                          | 8.60E-03 |
| GO_CELLULAR_RESPONSE_TO_INTERLEUKIN_1                                               | 8.66E-03 |
| GO_LYMPHOCYTE_MIGRATION                                                             | 9.70E-03 |
| BIOCARTA_MPR_PATHWAY                                                                | 1.13E-02 |
| REACTOME_ANTIGEN_PROCESSING_CROSS_PRESENTATION                                      | 1.18E-02 |
| GO_CHEMOKINE_RECEPTOR_BINDING                                                       | 1.25E-02 |
| KEGG_ALLOGRAFT_REJECTION                                                            | 1.26E-02 |
| GO_RESPONSE_TO_INTERLEUKIN_1                                                        | 1.27E-02 |
| GO_CCR_CHEMOKINE_RECEPTOR_BINDING                                                   | 1.33E-02 |
| REACTOME_PROTEIN_FOLDING                                                            | 1.58E-02 |
| REACTOME_FORMATION_OF_TUBULIN_FOLDING_INTERMEDIATES_BY_CCT_TRIC                     | 1.60E-02 |
| BIOCARTA_MTA3_PATHWAY                                                               | 1.61E-02 |
| KEGG_ANTIGEN_PROCESSING_AND_PRESENTATION                                            | 1.61E-02 |
| GO_RESPONSE_TO_STEROL                                                               | 1.62E-02 |
| KEGG_PROTEASOME                                                                     | 1.72E-02 |
| KEGG_DILATED_CARDIOMYOPATHY                                                         | 1.73E-02 |
| KEGG_NOD LIKE RECEPTOR SIGNALING PATHWAY                                            | 1.74E-02 |
| HALLMARK_CHOLESTEROL_HOMEOSTASIS                                                    | 1.85E-02 |
| GO_OXIDOREDUCTASE_ACTIVITY_ACTING_ON_A_SULFUR_GROUP_OF_DONORS                       | 1.91E-02 |
| GO_POSITIVE_REGULATION_OF_RESPONSE_TO_WOUNDING                                      | 1.93E-02 |
| GO_PROTEASOME_ACCESSORY_COMPLEX                                                     | 1.95E-02 |
| GO_CYTOKINE_RECEPTOR_BINDING                                                        | 1.96E-02 |
| GO_POSITIVE_REGULATION_OF_CELL_GROWTH                                               | 2.25E-02 |

|                                                                                            |          |
|--------------------------------------------------------------------------------------------|----------|
| GO_EMBRYO_IMPLANTATION                                                                     | 2.28E-02 |
| GO_REGULATION_OF_NEUTROPHIL_MIGRATION                                                      | 2.45E-02 |
| GO_HYDROLASE_ACTIVITY_ACTING_ON_CARBON_NITROGEN_BUT_NOT_PEPTIDE_BONDS_IN_CYCLIC_AMIDINES   | 2.46E-02 |
| GO_TUMOR_NECROSIS_FACTOR_RECEPTOR_SUPERFAMILY_BINDING                                      | 2.47E-02 |
| GO_RESPONSE_TO_AMINE                                                                       | 2.48E-02 |
| REACTOME_PREFOLDIN_MEDIATED_TRANSFER_OF_SUBSTRATE_TO_CCT_TRIC                              | 2.48E-02 |
| GO_IMMUNE_RESPONSE_REGULATING_CELL_SURFACE_RECEPTOR_SIGNALING_PATHWAY                      | 2.49E-02 |
| GO_POSITIVE_REGULATION_OF_INSULIN_SECRETION_INVOLVED_IN_CELLULAR_RESPONSE_TO_GLUCOSE       | 2.50E-02 |
| GO_CELL_CHEMOTAXIS                                                                         | 2.50E-02 |
| GO_LYMPHOCYTE_CHEMOTAXIS                                                                   | 2.52E-02 |
| GO_ANTIGEN_PROCESSING_AND_PRESENTATION_OF_PEPTIDE_ANTIGEN_VIA_MHC_CLASS_I                  | 2.68E-02 |
| GO_CATION_CATION_ANTIPORTER_ACTIVITY                                                       | 2.70E-02 |
| KEGG_AUTOIMMUNE_THYROID_DISEASE                                                            | 2.71E-02 |
| GO_RESPONSE_TO_ETHANOL                                                                     | 2.75E-02 |
| KEGG_TYPE_I_DIABETES_MELLITUS                                                              | 2.78E-02 |
| GO_PLATELET_AGGREGATION                                                                    | 2.95E-02 |
| GO_CYTOSOLIC_CALCIIUM_ION_TRANSPORT                                                        | 3.14E-02 |
| GO_POSITIVE_REGULATION_OF_NEUTROPHIL_MIGRATION                                             | 3.14E-02 |
| REACTOME_GENERATION_OF_SECOND_MESSENGER_MOLECULES                                          | 3.15E-02 |
| GO_TRANSCRIPTIONAL_ACTIVATOR_ACTIVITY_RNA_POLYMERASE_II_ENHANCER_SEQUENCE_SPECIFIC_BINDING | 3.16E-02 |
| GO_POSITIVE_REGULATION_OF_SMOOTH_MUSCLE_CELL_MIGRATION                                     | 3.17E-02 |
| GO_RESPONSE_TO_ELECTRICAL_STIMULUS                                                         | 3.17E-02 |
| GO_SOLUTE_CATION_ANTIPORTER_ACTIVITY                                                       | 3.18E-02 |
| KEGG_BIOSYNTHESIS_OF_UNSATURATED_FATTY_ACIDS                                               | 3.18E-02 |
| GO_STRUCTURAL_CONSTITUENT_OF_CYTOSKELETON                                                  | 3.19E-02 |
| GO_MHC_CLASS_I_PROTEIN_BINDING                                                             | 3.19E-02 |
| KEGG_GLYOXYLATE_AND_DICARBOXYLATE_METABOLISM                                               | 3.20E-02 |
| GO_PROTEASOME_COMPLEX                                                                      | 3.65E-02 |
| GO_MONOSACCHARIDE_BINDING                                                                  | 3.67E-02 |
| GO_EMBRYONIC_HEMOPOIESIS                                                                   | 3.70E-02 |
| GO_DISULFIDE_OXIDOREDUCTASE_ACTIVITY                                                       | 3.87E-02 |
| GO_MATERNAL_PROCESS_INVOLVED_IN_FEMALE_PREGNANCY                                           | 3.88E-02 |
| KEGG_TERPENOID_BACKBONE_BIOSYNTHESIS                                                       | 3.88E-02 |
| GO_MHC_CLASS_II_PROTEIN_COMPLEX_BINDING                                                    | 3.89E-02 |
| ST_INTEGRIN_SIGNALING_PATHWAY                                                              | 3.89E-02 |
| BIOCARTA_TNFR1_PATHWAY                                                                     | 3.90E-02 |
| GO_CLATHRIN_COATED_ENDOCYTIC_VESICLE                                                       | 3.90E-02 |
| GO_HETEROTRIMERIC_G_PROTEIN_COMPLEX                                                        | 3.92E-02 |
| GO_NEGATIVE_REGULATION_OF_VIRAL_TRANSCRIPTION                                              | 3.92E-02 |
| GO_REGULATION_OF_CELLULAR_AMINE_METABOLIC_PROCESS                                          | 3.93E-02 |

|                                                               |          |
|---------------------------------------------------------------|----------|
| GO_MHC_CLASS_II_RECEPTOR_ACTIVITY                             | 3.93E-02 |
| GO_MHC_PROTEIN_COMPLEX_BINDING                                | 4.09E-02 |
| GO_POSITIVE_REGULATION_OF_ANTIGEN_PROCESSING_AND_PRESENTATION | 4.16E-02 |
| KEGG_CHEMOKINE_SIGNALING_PATHWAY                              | 4.16E-02 |
| KEGG_INTESTINAL_IMMUNE_NETWORK_FOR_IGA_PRODUCTION             | 4.20E-02 |
| GO_RESPONSE_TO_VITAMIN                                        | 4.21E-02 |
| GO_B_CELL_RECEPTOR_SIGNALING_PATHWAY                          | 4.23E-02 |
| SIG_REGULATION_OF_THE_ACTIN_CYTOSKELETON_BY_RHO_GTPASES       | 4.52E-02 |
| GO_POSITIVE_REGULATION_OF_ACUTE_INFLAMMATORY_RESPONSE         | 4.58E-02 |
| GO_DETOXIFICATION                                             | 4.59E-02 |
| GO_INFLAMMATORY_RESPONSE                                      | 4.60E-02 |
| GO_CALCIIUM_ION_IMPORT_INTO_CYTOSOL                           | 4.72E-02 |
| GO_CLATHRIN_COATED_VESICLE_MEMBRANE                           | 4.73E-02 |
| GO_PTERIDINE_CONTAINING_COMPOUND_BIOSYNTHETIC_PROCESS         | 4.73E-02 |
| GO_REGULATION_OF_PODOSOME_ASSEMBLY                            | 4.77E-02 |
| GO_OXIDOREDUCTION_COENZYME_METABOLIC_PROCESS                  | 4.92E-02 |
| REACTOME_COSTIMULATION_BY_THE_CD28_FAMILY                     | 4.96E-02 |
| GO_RUFFLE_ORGANIZATION                                        | 4.98E-02 |
| GO_MRNA_TRANSCRIPTION_FROM_RNA_POLYMERASE_II_PROMOTER         | 4.99E-02 |

## Up-regulated in response to PMN

| Gene Set Name                                                             | FDR      |
|---------------------------------------------------------------------------|----------|
| HALLMARK_MYC_TARGETS_V2                                                   | 0.00E+00 |
| REACTOME_TRANSFERRIN_ENDOCYTOSIS_AND_RECYCLING                            | 0.00E+00 |
| REACTOME_IRON_UPTAKE_AND_TRANSPORT                                        | 0.00E+00 |
| GO_FERRIC_IRON_TRANSPORT                                                  | 0.00E+00 |
| GO_PROTON_TRANSPORTING_V_TYPE_ATPASE_COMPLEX                              | 0.00E+00 |
| GO_TRIVALENT_INORGANIC_CATION_TRANSPORT                                   | 0.00E+00 |
| GO_REGULATION_OF_CHOLESTEROL_TRANSPORT                                    | 0.00E+00 |
| GO_CHOLESTEROL_EFFLUX                                                     | 1.11E-04 |
| GO_PHAGOSOME_ACIDIFICATION                                                | 1.24E-04 |
| GO_REGULATION_OF_STEROL_TRANSPORT                                         | 1.39E-04 |
| REACTOME_INSULIN_RECEPTOR_RECYCLING                                       | 8.05E-04 |
| REACTOME_PROCESSING_OF_CAPPED_INTRON_CONTAINING_PRE_MRNA                  | 8.30E-04 |
| REACTOME_MRNA_SPLICING                                                    | 2.37E-03 |
| GO_MYELIN_SHEATH                                                          | 2.60E-03 |
| GO_IRON_ION_TRANSPORT                                                     | 2.79E-03 |
| HALLMARK_MYC_TARGETS_V1                                                   | 3.11E-03 |
| REACTOME_FORMATION_OF_TUBULIN_FOLDING_INTERMEDIATES_BY_CCT_TRIC           | 3.25E-03 |
| GO_ATPASE_ACTIVITY                                                        | 3.31E-03 |
| GO_PROTON_TRANSPORTING_TWO_SECTOR_ATPASE_COMPLEX                          | 3.43E-03 |
| GO_PRERIBOSOME                                                            | 4.96E-03 |
| REACTOME_LATENT_INFECTION_OF_HOMO_SAPIENS_WITH_MYCOBACTERIUM_TUBERCULOSIS | 5.15E-03 |
| GO_ATPASE_ACTIVITY_COUPLED                                                | 5.31E-03 |
| KEGG_OXIDATIVE_PHOSPHORYLATION                                            | 5.76E-03 |
| GO_ENDOCYTIC_VESICLE_LUMEN                                                | 6.62E-03 |
| GO_REGULATION_OF_MACROPHAGE_DERIVED_FOAM_CELL_DIFFERENTIATION             | 6.75E-03 |
| GO_STEROL_TRANSPORTER_ACTIVITY                                            | 7.07E-03 |
| REACTOME_MRNA_PROCESSING                                                  | 7.08E-03 |
| GO_BILE_ACID_METABOLIC_PROCESS                                            | 7.24E-03 |
| GO_NEGATIVE_REGULATION_OF_MACROPHAGE_DERIVED_FOAM_CELL_DIFFERENTIATION    | 7.51E-03 |
| GO_VACUOLAR_PROTON_TRANSPORTING_V_TYPE_ATPASE_COMPLEX                     | 8.11E-03 |
| KEGG_LYSOSOME                                                             | 8.38E-03 |
| GO_RNA_HELICASE_ACTIVITY                                                  | 9.23E-03 |
| HALLMARK_OXIDATIVE_PHOSPHORYLATION                                        | 1.15E-02 |
| GO_MITOCHONDRIAL_RNA_METABOLIC_PROCESS                                    | 1.17E-02 |
| GO_PH_REDUCTION                                                           | 1.18E-02 |
| GO_RESPONSE_TO_GAMMA_RADIATION                                            | 1.20E-02 |
| GO_REGULATION_OF_TELOMERASE_RNA_LOCALIZATION_TO_CAJAL_BODY                | 1.21E-02 |
| GO_HYDROGEN_ION_TRANSMEMBRANE_TRANSPORT                                   | 1.22E-02 |

|                                                                             |          |
|-----------------------------------------------------------------------------|----------|
| GO_REVERSE_CHOLESTEROL_TRANSPORT                                            | 1.53E-02 |
| GO_PHOSPHOLIPID_EFFLUX                                                      | 1.56E-02 |
| GO_REGULATION_OF_CHOLESTEROL_STORAGE                                        | 1.63E-02 |
| GO_PROTON_TRANSPORTING_TWO_SECTOR_ATPASE_COMPLEX_PROTON_TRANSPORTING_DOMAIN | 1.66E-02 |
| GO_POSITIVE_REGULATION_OF_TELOMERASE_RNA_LOCALIZATION_TO_CAJAL_BODY         | 1.86E-02 |
| GO_MITOCHONDRIAL_MEMBRANE_ORGANIZATION                                      | 1.95E-02 |
| GO_GAS_TRANSPORT                                                            | 1.96E-02 |
| GO_NEUTRAL_LIPID_CATABOLIC_PROCESS                                          | 1.97E-02 |
| GO_REGULATION_OF_CHOLESTEROL_EFFLUX                                         | 2.01E-02 |
| GO_90S_PRERIBOSOME                                                          | 2.09E-02 |
| GO_HYDROGEN_EXPORTING_ATPASE_ACTIVITY                                       | 2.13E-02 |
| GO_RIBOSOMAL_SMALL_SUBUNIT_BINDING                                          | 2.18E-02 |
| GO_CELL_CORTEX                                                              | 2.19E-02 |
| GO_NUCLEOLAR_PART                                                           | 2.33E-02 |
| GO_IRON_ION_HOMEOSTASIS                                                     | 2.33E-02 |
| GO_POSITIVE_REGULATION_OF_CHOLESTEROL_TRANSPORT                             | 2.36E-02 |
| GO_POSITIVE_REGULATION_OF_STEROL_TRANSPORT                                  | 2.68E-02 |
| KEGG_VIBRIO_CHOLERAE_INFECTION                                              | 2.91E-02 |
| GO_POSITIVE_REGULATION_OF_CHOLESTEROL_EFFLUX                                | 2.93E-02 |
| REACTOME_MITOCHONDRIAL_PROTEIN_IMPORT                                       | 2.94E-02 |
| GO_ACYLGLYCEROL_CATABOLIC_PROCESS                                           | 2.96E-02 |
| REACTOME_SYNTHESIS_OF_BILE_ACIDS_AND_BILE_SALTS                             | 2.97E-02 |
| GO_HYDROGEN_ION_TRANSMEMBRANE_TRANSPORTER_ACTIVITY                          | 3.05E-02 |
| GO_DEOXYRIBONUCLEASE_ACTIVITY                                               | 3.08E-02 |
| REACTOME_ABCA_TRANSPORTERS_IN_LIPID_HOMEOSTASIS                             | 3.09E-02 |
| REACTOME_MITOCHONDRIAL_TRNA_AMINOACYLATION                                  | 3.12E-02 |
| REACTOME_HDL_MEDIATED_LIPID_TRANSPORT                                       | 3.13E-02 |
| GO_ATPASE_ACTIVITY_COUPLED_TO_MOVEMENT_OF_SUBSTANCES                        | 3.15E-02 |
| GO_UNFOLDED_PROTEIN_BINDING                                                 | 3.25E-02 |
| GO_OXYGEN_TRANSPORT                                                         | 3.36E-02 |
| GO_HYDROGEN_TRANSPORT                                                       | 3.65E-02 |
| GO_IMP_BIOSYNTHETIC_PROCESS                                                 | 3.69E-02 |
| GO_PIGMENT_GRANULE                                                          | 3.77E-02 |
| GO_REGULATION_OF_LIPID_STORAGE                                              | 3.79E-02 |
| GO_HIGH_DENSITY_LIPOPROTEIN_PARTICLE_REMODELING                             | 3.83E-02 |
| GO_TRIGLYCERIDE_CATABOLIC_PROCESS                                           | 3.84E-02 |
| GO_CYTOPLASMIC_REGION                                                       | 3.84E-02 |
| GO_CELL_CORTEX_PART                                                         | 3.84E-02 |
| GO_PROTEIN_TRANSPORTER_ACTIVITY                                             | 3.84E-02 |
| GO_RNA_SPLICING_VIA_TRANSESTERIFICATION_REACTIONS                           | 3.85E-02 |

|                                                                            |          |
|----------------------------------------------------------------------------|----------|
| GO_TRANSITION_METAL_ION_TRANSPORT                                          | 3.86E-02 |
| GO_ATP_HYDROLYSIS_COUPLED_TRANSMEMBRANE_TRANSPORT                          | 3.86E-02 |
| BIOCARTA_CELL2CELL_PATHWAY                                                 | 3.86E-02 |
| GO_CELLULAR_PIGMENTATION                                                   | 3.93E-02 |
| GO_LIPID_TRANSPORTER_ACTIVITY                                              | 3.97E-02 |
| GO_REGULATION_OF_HORMONE_BIOSYNTHETIC_PROCESS                              | 3.99E-02 |
| REACTOME_MRNA_3_END_PROCESSING                                             | 4.02E-02 |
| GO_CHOLESTEROL_TRANSPORTER_ACTIVITY                                        | 4.09E-02 |
| GO_MITOCHONDRIAL_TRANSPORT                                                 | 4.16E-02 |
| GO_ENDONUCLEASE_ACTIVITY_ACTIVE_WITH_EITHER_RIBO_OR_DEOXYRIBONUCLEIC_ACIDS | 4.35E-02 |
| GO_PLASMA_LIPOPROTEIN_PARTICLE_REMODELING                                  | 4.43E-02 |
| KEGG_PRIMARY_BILE_ACID_BIOSYNTHESIS                                        | 4.58E-02 |
| GO_PURINE_NTP_DEPENDENT_HELICASE_ACTIVITY                                  | 4.86E-02 |
| GO_PROTEIN_LIPID_COMPLEX_REMODELING                                        | 4.89E-02 |
| GO_CELLULAR_PROTEIN_COMPLEX_LOCALIZATION                                   | 4.90E-02 |

### Down-regulated in response to PMN

| Gene Set Name                                  | FDR      |
|------------------------------------------------|----------|
| HALLMARK_INTERFERON_ALPHA_RESPONSE             | 0.00E+00 |
| GO_RESPONSE_TO_TYPE_I_INTERFERON               | 0.00E+00 |
| HALLMARK_INTERFERON_GAMMA_RESPONSE             | 0.00E+00 |
| REACTOME_INTERFERON_ALPHA_BETA_SIGNALING       | 0.00E+00 |
| GO_DEFENSE_RESPONSE_TO_VIRUS                   | 0.00E+00 |
| GO_INTERFERON_GAMMA_MEDIATED_SIGNALING_PATHWAY | 0.00E+00 |
| KEGG_SYSTEMIC_LUPUS_ERYTHEMATOSUS              | 0.00E+00 |
| REACTOME_RNA_POL_I_PROMOTER_OPENING            | 0.00E+00 |
| GO_STEROL_BIOSYNTHETIC_PROCESS                 | 0.00E+00 |
| REACTOME_INTERFERON_GAMMA_SIGNALING            | 0.00E+00 |
| REACTOME_AMYLOIDS                              | 0.00E+00 |
| REACTOME_INTERFERON_SIGNALING                  | 0.00E+00 |
| HALLMARK_CHOLESTEROL_HOMEOSTASIS               | 0.00E+00 |
| REACTOME_CHOLESTEROL_BIOSYNTHESIS              | 0.00E+00 |
| REACTOME_PACKAGING_OF_TELOMERE_ENDS            | 0.00E+00 |
| GO_RESPONSE_TO_VIRUS                           | 0.00E+00 |
| GO_DNA_PACKAGING_COMPLEX                       | 0.00E+00 |
| GO_CHROMATIN_SILENCING_AT_RDNA                 | 1.00E-03 |
| GO_CELLULAR_RESPONSE_TO_ZINC_ION               | 1.00E-03 |
| GO_NUCLEAR_NUCLEOSOME                          | 1.00E-03 |
| KEGG_GRAFT_VERSUS_HOST_DISEASE                 | 1.00E-03 |
| GO_RESPONSE_TO_INTERFERON_ALPHA                | 2.00E-03 |

|                                                                                       |          |
|---------------------------------------------------------------------------------------|----------|
| GO_CELLULAR_RESPONSE_TO_INTERFERON_GAMMA                                              | 2.00E-03 |
| GO_RESPONSE_TO_INTERFERON_GAMMA                                                       | 5.00E-03 |
| GO_RESPONSE_TO_ZINC_ION                                                               | 5.00E-03 |
| GO_DEFENSE_RESPONSE_TO_OTHER_ORGANISM                                                 | 7.00E-03 |
| REACTOME_TRAF6_MEDIATED_IRF7_ACTIVATION                                               | 8.00E-03 |
| GO_CHROMATIN_SILENCING                                                                | 8.00E-03 |
| REACTOME_RIG_I_MDA5_MEDIATED_INDUCTION_OF_IFN_ALPHA_BETA_PATHWAYS                     | 9.00E-03 |
| REACTOME_PEPTIDE_CHAIN_ELONGATION                                                     | 9.00E-03 |
| REACTOME_NEGATIVE_REGULATORS_OF_RIG_I_MDA5_SIGNALING                                  | 9.00E-03 |
| REACTOME_RNA_POL_I_TRANSCRIPTION                                                      | 9.00E-03 |
| GO_REGULATION_OF_HEMATOPOIETIC_PROGENITOR_CELL_DIFFERENTIATION                        | 9.00E-03 |
| GO_TRANSCRIPTIONAL_REPRESSOR_ACTIVITY_RNA_POLYMERASE_II_CORE_PROMOTER_PROXIMAL_REGION | 9.00E-03 |
| KEGG_RIBOSOME                                                                         | 9.00E-03 |
| KEGG_ALLOGRAFT_REJECTION                                                              | 9.00E-03 |
| KEGG_TYPE_I_DIABETES_MELLITUS                                                         | 9.00E-03 |
| GO_CLATHRIN_COATED_ENDOCYTIC_VESICLE_MEMBRANE                                         | 1.10E-02 |
| REACTOME_MEIOTIC_SYNAPSIS                                                             | 1.20E-02 |
| GO_IMMUNE_EFFECTOR_PROCESS                                                            | 1.30E-02 |
| REACTOME_CYTOKINE_SIGNALING_IN_IMMUNE_SYSTEM                                          | 1.30E-02 |
| BIOCARTA_TH1TH2_PATHWAY                                                               | 1.30E-02 |
| HALLMARK_MTORC1_SIGNALING                                                             | 1.30E-02 |
| GO_DETECTION_OF_BIOTIC_STIMULUS                                                       | 1.30E-02 |
| GO_PURINE_DEOXYRIBONUCLEOTIDE_METABOLIC_PROCESS                                       | 1.30E-02 |
| GO_MHC_CLASS_II_PROTEIN_COMPLEX                                                       | 1.30E-02 |
| GO_ISOPRENOID_BIOSYNTHETIC_PROCESS                                                    | 1.40E-02 |
| GO_CLATHRIN_COATED_ENDOCYTIC_VESICLE                                                  | 1.40E-02 |
| GO_CYCLIN_DEPENDENT_PROTEIN_SERINE_THREONINE_KINASE_INHIBITOR_ACTIVITY                | 1.80E-02 |
| GO_REGULATION_OF_ANTIGEN_PROCESSING_AND_PRESENTATION                                  | 1.90E-02 |
| GO_DETECTION_OF_OTHER_ORGANISM                                                        | 2.00E-02 |
| GO_NEGATIVE_REGULATION_OF_GENE_EXPRESSION_EPIGENETIC                                  | 2.00E-02 |
| REACTOME_DEPOSITION_OF_NEW_CENPA_CONTAINING_NUCLEOSOMES_AT_THE_CENTROMERE             | 2.00E-02 |
| GO_MHC_PROTEIN_COMPLEX                                                                | 2.00E-02 |
| GO_PROTEIN_DNA_COMPLEX                                                                | 2.00E-02 |
| GO_PEPTIDOGLYCAN_BINDING                                                              | 2.10E-02 |
| GO_DNA_REPLICATION_DEPENDENT_NUCLEOSOME_ASSEMBLY                                      | 2.10E-02 |
| GO_NEGATIVE_REGULATION_OF_TYPE_I_INTERFERON_PRODUCTION                                | 2.20E-02 |
| GO_DNA_REPLICATION_DEPENDENT_NUCLEOSOME_ORGANIZATION                                  | 2.20E-02 |
| GO_NEGATIVE_REGULATION_OF_FAT_CELL_DIFFERENTIATION                                    | 2.30E-02 |
| KEGG_INTESTINAL_IMMUNE_NETWORK_FOR_IGA_PRODUCTION                                     | 2.30E-02 |
| HALLMARK_INFLAMMATORY_RESPONSE                                                        | 2.40E-02 |

|                                                                                    |          |
|------------------------------------------------------------------------------------|----------|
| GO_LIPID_DIGESTION                                                                 | 2.70E-02 |
| GO_MATERNAL_BEHAVIOR                                                               | 2.70E-02 |
| GO_POSITIVE_REGULATION_OF_INTERFERON_BETA_PRODUCTION                               | 2.80E-02 |
| GO_REGULATION_OF_INTERFERON_BETA_PRODUCTION                                        | 2.80E-02 |
| GO_REGULATION_OF_MEGAKARYOCYTE_DIFFERENTIATION                                     | 2.80E-02 |
| REACTOME_YAP1_AND_WWTR1_TAZ_STIMULATED_GENE_EXPRESSION                             | 2.80E-02 |
| KEGG_RIG_I_LIKE_RECEPTOR_SIGNALING_PATHWAY                                         | 2.80E-02 |
| GO_DEOXYRIBONUCLEOTIDE_BIOSYNTHETIC_PROCESS                                        | 2.80E-02 |
| GO_PEPTIDE_ANTIGEN_BINDING                                                         | 2.90E-02 |
| GO_INFLAMMASOME_COMPLEX                                                            | 3.00E-02 |
| GO_POSITIVE_REGULATION_OF_LYMPHOCYTE_DIFFERENTIATION                               | 3.00E-02 |
| GO_REGULATION_OF_INTERLEUKIN_8_BIOSYNTHETIC_PROCESS                                | 3.00E-02 |
| GO_PARENTAL_BEHAVIOR                                                               | 3.50E-02 |
| GO_SIGNALING_PATTERN_RECOGNITION_RECEPTOR_ACTIVITY                                 | 3.80E-02 |
| REACTOME_TELOMERE_MAINTENANCE                                                      | 3.90E-02 |
| GO_REGULATION_OF_T_HELPER_CELL_DIFFERENTIATION                                     | 4.10E-02 |
| KEGG_LEISHMANIA_INFECTION                                                          | 4.20E-02 |
| GO_POSITIVE_REGULATION_OF_TYPE_2_IMMUNE_RESPONSE                                   | 4.20E-02 |
| GO_POSITIVE_REGULATION_OF_T_HELPER_CELL_DIFFERENTIATION                            | 4.20E-02 |
| GO_TRANSCRIPTION_FACTOR_ACTIVITY_RNA_POLYMERASE_II_CORE_PROMOTER_SEQUENCE_SPECIFIC | 4.30E-02 |
| GO_NEGATIVE_REGULATION_OF_HEMATOPOIETIC_PROGENITOR_CELL_DIFFERENTIATION            | 4.50E-02 |
| REACTOME_BMAL1_CLOCK_NPAS2_ACTIVATES_CIRCADIAN_EXPRESSION                          | 4.50E-02 |
| KEGG_AUTOIMMUNE_THYROID_DISEASE                                                    | 4.50E-02 |
| GO_STEROL_METABOLIC_PROCESS                                                        | 4.50E-02 |
| GO_ALCOHOL_BIOSYNTHETIC_PROCESS                                                    | 4.80E-02 |



**Supplemental Table E4.** GSEA leading edge membership profile of interferon-associated pathways for each M2 stimulus in non-CF MDMs. Please also see a visual depiction of this data in Supplemental Figure E3.

| <b>Gene Symbol</b> | <b>IL10</b> | <b>IL4</b> | <b>AZM</b> | <b>MP</b> | <b>PMN</b> |
|--------------------|-------------|------------|------------|-----------|------------|
| OASL               | Yes         | Yes        | Yes        | Yes       | Yes        |
| TRIM21             | Yes         | Yes        | Yes        | Yes       | Yes        |
| GBP4               | Yes         | Yes        | Yes        | No        | Yes        |
| TRIM5              | Yes         | Yes        | Yes        | No        | Yes        |
| IRF7               | Yes         | Yes        | No         | Yes       | Yes        |
| OAS2               | Yes         | No         | Yes        | Yes       | Yes        |
| B2M                | Yes         | Yes        | Yes        | No        | No         |
| IFI30              | Yes         | Yes        | No         | Yes       | No         |
| ADAR               | Yes         | Yes        | No         | No        | Yes        |
| CASP1              | Yes         | Yes        | No         | No        | Yes        |
| CMPK2              | Yes         | Yes        | No         | No        | Yes        |
| DDX60              | Yes         | Yes        | No         | No        | Yes        |
| DHX58              | Yes         | Yes        | No         | No        | Yes        |
| EIF2AK2            | Yes         | Yes        | No         | No        | Yes        |
| EPSTI1             | Yes         | Yes        | No         | No        | Yes        |
| FTSJD2             | Yes         | Yes        | No         | No        | Yes        |
| GMPR               | Yes         | Yes        | No         | No        | Yes        |
| HERC6              | Yes         | Yes        | No         | No        | Yes        |
| IFI35              | Yes         | Yes        | No         | No        | Yes        |
| IFI44              | Yes         | Yes        | No         | No        | Yes        |
| IFI44L             | Yes         | Yes        | No         | No        | Yes        |
| IFIH1              | Yes         | Yes        | No         | No        | Yes        |
| IFIT2              | Yes         | Yes        | No         | No        | Yes        |
| IFIT3              | Yes         | Yes        | No         | No        | Yes        |
| IL15               | Yes         | Yes        | No         | No        | Yes        |
| IRF1               | Yes         | Yes        | No         | No        | Yes        |
| ISG15              | Yes         | Yes        | No         | No        | Yes        |
| ISG20              | Yes         | Yes        | No         | No        | Yes        |
| LGALS3BP           | Yes         | Yes        | No         | No        | Yes        |
| MX1                | Yes         | Yes        | No         | No        | Yes        |
| OAS1               | Yes         | Yes        | No         | No        | Yes        |
| PARP14             | Yes         | Yes        | No         | No        | Yes        |
| PARP9              | Yes         | Yes        | No         | No        | Yes        |
| PRIC285            | Yes         | Yes        | No         | No        | Yes        |
| RTP4               | Yes         | Yes        | No         | No        | Yes        |
| SAMD9              | Yes         | Yes        | No         | No        | Yes        |
| SAMD9L             | Yes         | Yes        | No         | No        | Yes        |

|          |     |     |     |     |     |
|----------|-----|-----|-----|-----|-----|
| SP110    | Yes | Yes | No  | No  | Yes |
| STAT2    | Yes | Yes | No  | No  | Yes |
| TMEM140  | Yes | Yes | No  | No  | Yes |
| UBA7     | Yes | Yes | No  | No  | Yes |
| UBE2L6   | Yes | Yes | No  | No  | Yes |
| USP18    | Yes | Yes | No  | No  | Yes |
| IRF3     | Yes | No  | Yes | Yes | No  |
| IRF4     | Yes | No  | Yes | Yes | No  |
| HLA-F    | Yes | No  | Yes | No  | Yes |
| BST2     | Yes | No  | No  | Yes | Yes |
| OAS3     | Yes | No  | No  | Yes | Yes |
| STAT1    | Yes | No  | No  | Yes | Yes |
| GBP2     | No  | Yes | Yes | No  | Yes |
| AIF1     | No  | No  | Yes | Yes | Yes |
| CAMK2G   | No  | No  | Yes | Yes | Yes |
| CCL13    | No  | No  | Yes | Yes | Yes |
| CD86     | No  | No  | Yes | Yes | Yes |
| CIITA    | No  | No  | Yes | Yes | Yes |
| FCGR1A   | No  | No  | Yes | Yes | Yes |
| FCGR1B   | No  | No  | Yes | Yes | Yes |
| GBP1     | No  | No  | Yes | Yes | Yes |
| GBP5     | No  | No  | Yes | Yes | Yes |
| GCH1     | No  | No  | Yes | Yes | Yes |
| HCK      | No  | No  | Yes | Yes | Yes |
| HLA-DPA1 | No  | No  | Yes | Yes | Yes |
| HLA-DPB1 | No  | No  | Yes | Yes | Yes |
| HLA-DRA  | No  | No  | Yes | Yes | Yes |
| HLA-DRB3 | No  | No  | Yes | Yes | Yes |
| HLA-DRB4 | No  | No  | Yes | Yes | Yes |
| IFNGR2   | No  | No  | Yes | Yes | Yes |
| TRIM8    | No  | No  | Yes | Yes | Yes |
| MOV10    | Yes | Yes | No  | No  | No  |
| PNPT1    | Yes | Yes | No  | No  | No  |
| PSME1    | Yes | Yes | No  | No  | No  |
| RSAD2    | Yes | Yes | No  | No  | No  |
| HLA-A    | Yes | No  | Yes | No  | No  |
| HLA-B    | Yes | No  | Yes | No  | No  |
| HLA-G    | Yes | No  | Yes | No  | No  |
| HLA-H    | Yes | No  | Yes | No  | No  |
| NUB1     | Yes | No  | No  | Yes | No  |
| FAM46A   | Yes | No  | No  | No  | Yes |
| IFIT1    | Yes | No  | No  | No  | Yes |
| LAMP3    | Yes | No  | No  | No  | Yes |

|           |     |     |     |     |     |
|-----------|-----|-----|-----|-----|-----|
| MX2       | Yes | No  | No  | No  | Yes |
| NCOA7     | Yes | No  | No  | No  | Yes |
| PSMB9     | Yes | No  | No  | No  | Yes |
| TAP1      | Yes | No  | No  | No  | Yes |
| TYK2      | Yes | No  | No  | No  | Yes |
| WARS      | Yes | No  | No  | No  | Yes |
| XAF1      | Yes | No  | No  | No  | Yes |
| HLA-C     | No  | Yes | Yes | No  | No  |
| CXCL11    | No  | Yes | No  | No  | Yes |
| ELF1      | No  | Yes | No  | No  | Yes |
| IFITM3    | No  | Yes | No  | No  | Yes |
| IL7       | No  | Yes | No  | No  | Yes |
| IRF2      | No  | Yes | No  | No  | Yes |
| IRF9      | No  | Yes | No  | No  | Yes |
| NMI       | No  | Yes | No  | No  | Yes |
| PLSCR1    | No  | Yes | No  | No  | Yes |
| TDRD7     | No  | Yes | No  | No  | Yes |
| TXNIP     | No  | Yes | No  | No  | Yes |
| CCL1      | No  | No  | Yes | Yes | No  |
| CCL14     | No  | No  | Yes | Yes | No  |
| CCL15     | No  | No  | Yes | Yes | No  |
| CCL22     | No  | No  | Yes | Yes | No  |
| CCL23     | No  | No  | Yes | Yes | No  |
| CCL3      | No  | No  | Yes | Yes | No  |
| CCL3L1    | No  | No  | Yes | Yes | No  |
| CCL3L3    | No  | No  | Yes | Yes | No  |
| CCL4L2    | No  | No  | Yes | Yes | No  |
| CCL7      | No  | No  | Yes | Yes | No  |
| CD44      | No  | No  | Yes | Yes | No  |
| CXCL16    | No  | No  | Yes | Yes | No  |
| GAPDH     | No  | No  | Yes | Yes | No  |
| HLA-DQA1  | No  | No  | Yes | Yes | No  |
| HLA-DQB1  | No  | No  | Yes | Yes | No  |
| HLA-DRB5  | No  | No  | Yes | Yes | No  |
| NCAM1     | No  | No  | Yes | Yes | No  |
| AXL       | No  | No  | Yes | No  | Yes |
| IFNAR1    | No  | No  | Yes | No  | Yes |
| IFNGR1    | No  | No  | Yes | No  | Yes |
| IL12RB1   | No  | No  | Yes | No  | Yes |
| IRG1      | No  | No  | Yes | No  | Yes |
| LOC441019 | No  | No  | Yes | No  | Yes |
| MEFV      | No  | No  | Yes | No  | Yes |
| MT2A      | No  | No  | Yes | No  | Yes |

|          |     |     |     |     |     |
|----------|-----|-----|-----|-----|-----|
| PDE4B    | No  | No  | Yes | No  | Yes |
| PTPN2    | No  | No  | Yes | No  | Yes |
| PYCARD   | No  | No  | Yes | No  | Yes |
| RPL13A   | No  | No  | Yes | No  | Yes |
| SLC26A6  | No  | No  | Yes | No  | Yes |
| TLR7     | No  | No  | Yes | No  | Yes |
| TLR8     | No  | No  | Yes | No  | Yes |
| TRIM22   | No  | No  | Yes | No  | Yes |
| C19orf66 | No  | No  | No  | Yes | Yes |
| CCL19    | No  | No  | No  | Yes | Yes |
| CCL8     | No  | No  | No  | Yes | Yes |
| EPRS     | No  | No  | No  | Yes | Yes |
| KYNU     | No  | No  | No  | Yes | Yes |
| TRIM34   | No  | No  | No  | Yes | Yes |
| CCRL2    | Yes | No  | No  | No  | No  |
| IFI27    | Yes | No  | No  | No  | No  |
| IFITM1   | Yes | No  | No  | No  | No  |
| IRF5     | Yes | No  | No  | No  | No  |
| IRF8     | Yes | No  | No  | No  | No  |
| LY6E     | Yes | No  | No  | No  | No  |
| PSMA3    | Yes | No  | No  | No  | No  |
| PSMB8    | Yes | No  | No  | No  | No  |
| PSME2    | Yes | No  | No  | No  | No  |
| RNASEL   | Yes | No  | No  | No  | No  |
| RNF31    | Yes | No  | No  | No  | No  |
| TRAFD1   | Yes | No  | No  | No  | No  |
| TRIM56   | Yes | No  | No  | No  | No  |
| C1S      | No  | Yes | No  | No  | No  |
| CASP8    | No  | Yes | No  | No  | No  |
| FAM125A  | No  | Yes | No  | No  | No  |
| IL4R     | No  | Yes | No  | No  | No  |
| PROCR    | No  | Yes | No  | No  | No  |
| SLC25A28 | No  | Yes | No  | No  | No  |
| TRIM25   | No  | Yes | No  | No  | No  |
| BCL3     | No  | No  | Yes | No  | No  |
| CCL20    | No  | No  | Yes | No  | No  |
| CCL5     | No  | No  | Yes | No  | No  |
| CCR2     | No  | No  | Yes | No  | No  |
| CD14     | No  | No  | Yes | No  | No  |
| CD244    | No  | No  | Yes | No  | No  |
| DAPK1    | No  | No  | Yes | No  | No  |
| EBI3     | No  | No  | Yes | No  | No  |
| FADD     | No  | No  | Yes | No  | No  |

|          |    |    |     |     |     |
|----------|----|----|-----|-----|-----|
| FZD5     | No | No | Yes | No  | No  |
| HLA-DRB1 | No | No | Yes | No  | No  |
| HLA-E    | No | No | Yes | No  | No  |
| HMGB1    | No | No | Yes | No  | No  |
| IL10     | No | No | Yes | No  | No  |
| IL18     | No | No | Yes | No  | No  |
| IL1B     | No | No | Yes | No  | No  |
| IL27RA   | No | No | Yes | No  | No  |
| JAK2     | No | No | Yes | No  | No  |
| LILRB1   | No | No | Yes | No  | No  |
| PIAS1    | No | No | Yes | No  | No  |
| PML      | No | No | Yes | No  | No  |
| PTAFR    | No | No | Yes | No  | No  |
| PTPN22   | No | No | Yes | No  | No  |
| PTPN6    | No | No | Yes | No  | No  |
| RARA     | No | No | Yes | No  | No  |
| SASH3    | No | No | Yes | No  | No  |
| SLAMF1   | No | No | Yes | No  | No  |
| SLAMF6   | No | No | Yes | No  | No  |
| SLC11A1  | No | No | Yes | No  | No  |
| TICAM2   | No | No | Yes | No  | No  |
| TLR3     | No | No | Yes | No  | No  |
| TLR4     | No | No | Yes | No  | No  |
| TNF      | No | No | Yes | No  | No  |
| TRIM38   | No | No | Yes | No  | No  |
| TRIM62   | No | No | Yes | No  | No  |
| CCL2     | No | No | No  | Yes | No  |
| CYP27B1  | No | No | No  | Yes | No  |
| EDN1     | No | No | No  | Yes | No  |
| ICAM1    | No | No | No  | Yes | No  |
| SEC61A1  | No | No | No  | Yes | No  |
| SYNCRIP  | No | No | No  | Yes | No  |
| TRIM68   | No | No | No  | Yes | No  |
| MARCH1   | No | No | No  | No  | Yes |
| ARID5B   | No | No | No  | No  | Yes |
| ASS1     | No | No | No  | No  | Yes |
| BTG1     | No | No | No  | No  | Yes |
| CALCOCO2 | No | No | No  | No  | Yes |
| CASP3    | No | No | No  | No  | Yes |
| CASP4    | No | No | No  | No  | Yes |
| CCL18    | No | No | No  | No  | Yes |
| CD40     | No | No | No  | No  | Yes |
| CD74     | No | No | No  | No  | Yes |

|         |    |    |    |    |     |
|---------|----|----|----|----|-----|
| CDKN1A  | No | No | No | No | Yes |
| DDX58   | No | No | No | No | Yes |
| EGR1    | No | No | No | No | Yes |
| FGL2    | No | No | No | No | Yes |
| GAS6    | No | No | No | No | Yes |
| HERC5   | No | No | No | No | Yes |
| HLA-DMA | No | No | No | No | Yes |
| HMGB2   | No | No | No | No | Yes |
| IFI6    | No | No | No | No | Yes |
| IFITM2  | No | No | No | No | Yes |
| IFNAR2  | No | No | No | No | Yes |
| KPNB1   | No | No | No | No | Yes |
| LAP3    | No | No | No | No | Yes |
| LYSMD2  | No | No | No | No | Yes |
| MAPK3   | No | No | No | No | Yes |
| MTHFD2  | No | No | No | No | Yes |
| NAMPT   | No | No | No | No | Yes |
| NCOA3   | No | No | No | No | Yes |
| NUP214  | No | No | No | No | Yes |
| PCBP2   | No | No | No | No | Yes |
| PELI1   | No | No | No | No | Yes |
| POLR3C  | No | No | No | No | Yes |
| PPM1B   | No | No | No | No | Yes |
| PTGS2   | No | No | No | No | Yes |
| RBCK1   | No | No | No | No | Yes |
| RNF135  | No | No | No | No | Yes |
| RNF216  | No | No | No | No | Yes |
| RPS27A  | No | No | No | No | Yes |
| SHMT2   | No | No | No | No | Yes |
| SP100   | No | No | No | No | Yes |
| ST8SIA4 | No | No | No | No | Yes |
| STAT4   | No | No | No | No | Yes |
| TAX1BP1 | No | No | No | No | Yes |
| TLR2    | No | No | No | No | Yes |
| TNFAIP6 | No | No | No | No | Yes |
| TNFSF10 | No | No | No | No | Yes |
| TOR1B   | No | No | No | No | Yes |
| UBC     | No | No | No | No | Yes |
| UBE2E1  | No | No | No | No | Yes |
| ZBP1    | No | No | No | No | Yes |
| ZNFX1   | No | No | No | No | Yes |

**Supplemental Table E5.** Leading edge gene list of M2 gene sets associated with transcriptional response of alveolar macrophages in allergen-induced asthma. For gene members of each gene set, log<sub>2</sub> ratio of post allergen/pre allergen RNA-seq counts are shown. Concordant indicates that the direction of gene expression change in MDMs following a given M2 stimulus (e.g., IL4) was in the same direction as when alveolar macrophages were exposed to allergen, whereas discordant implies that the direction of change was opposite (e.g., MDM genes down-regulated when stimulated by AZM are up-regulated in allergen-challenged alveolar macrophages).

| Up-regulated transcriptional response after allergen challenge |                             |                                 |                             |                                   |                             |                                  |                             |
|----------------------------------------------------------------|-----------------------------|---------------------------------|-----------------------------|-----------------------------------|-----------------------------|----------------------------------|-----------------------------|
| Induced by IL4<br>(concordant)                                 | Log <sub>2</sub> [Post/Pre] | Induced by IL10<br>(concordant) | Log <sub>2</sub> [Post/Pre] | Suppressed by AZM<br>(discordant) | Log <sub>2</sub> [Post/Pre] | Suppressed by MP<br>(discordant) | Log <sub>2</sub> [Post/Pre] |
| CCL13                                                          | 5.18                        | ENPP2                           | 4.28                        | MERTK                             | 4.82                        | SLC7A11                          | 4.59                        |
| CCL17                                                          | 5.86                        | SLC39A8                         | 3.17                        | RNASE1                            | 4.25                        | CCL2                             | 3.99                        |
| ENPP2                                                          | 4.28                        | TMEM176A                        | 3.09                        | CD93                              | 3.61                        | NLRP3                            | 3.57                        |
| ALOX15                                                         | 4.61                        | MTSS1                           | 3.22                        | NLRP3                             | 3.57                        | FCN1                             | 3.72                        |
| GAS6                                                           | 4.01                        | FAM20A                          | 3.27                        | FCN1                              | 3.72                        | TMEM176A                         | 3.09                        |
| PARM1                                                          | 4.73                        | IL21R                           | 3.41                        | CORO1A                            | 3.51                        | CCR7                             | 3.33                        |
| CD209                                                          | 3.81                        | SIGLEC10                        | 3.16                        | GAL3ST4                           | 4.23                        | IL21R                            | 3.41                        |
| HSD11B1                                                        | 4.03                        | LTBP2                           | 4.18                        | SLC39A8                           | 3.17                        | GPR84                            | 3.39                        |
| CD200R1                                                        | 4.71                        | FZD2                            | 5.11                        | ETV5                              | 3.53                        | TSPAN33                          | 3.41                        |
| ADAM19                                                         | 3.41                        | TDO2                            | 3.04                        | ATP8B4                            | 3.11                        | SLC7A5                           | 2.70                        |
| TRAF1                                                          | 3.25                        | EDNRB                           | 6.06                        | CCND2                             | 2.97                        | CD48                             | 2.59                        |
| BIRC3                                                          | 3.01                        | VCAN                            | 2.07                        | SIGLEC10                          | 3.16                        | CCL8                             | 3.04                        |
| CST7                                                           | 3.23                        | SMOX                            | 1.73                        | ST8SIA4                           | 2.86                        | IL411                            | 2.63                        |
| CCR7                                                           | 3.33                        | PNKD                            | 1.52                        | GPR84                             | 3.39                        | LGALS2                           | 3.08                        |
| TNFRSF11A                                                      | 4.02                        | PIM1                            | 1.38                        | P2RY6                             | 4.14                        | LAMP3                            | 2.51                        |
| SLC7A5                                                         | 2.70                        | CCL3L3                          | 2.20                        | ADORA3                            | 3.12                        | CCL7                             | 5.48                        |
| CCL8                                                           | 3.04                        | CBS                             | 1.65                        | LAMP3                             | 2.51                        | CCL22                            | 2.80                        |
| LAMP3                                                          | 2.51                        | SLAMF1                          | 1.94                        | CAMK1                             | 2.44                        | RFTN1                            | 2.11                        |
| MAOA                                                           | 2.98                        | CYP27B1                         | 1.74                        | MS4A6A                            | 2.16                        | CBX6                             | 1.98                        |
| CAMK1                                                          | 2.44                        | IL7R                            | 1.20                        | FGL2                              | 2.11                        | KCNK13                           | 2.23                        |
| MS4A6A                                                         | 2.16                        | PROK2                           | 2.42                        | ARAP3                             | 2.95                        | SLAMF7                           | 2.16                        |
| GPR35                                                          | 2.86                        | KIAA1199                        | 3.95                        | STAT4                             | 2.19                        | LILRB2                           | 1.59                        |
| FGL2                                                           | 2.11                        | UCP2                            | 1.14                        | KCNK13                            | 2.23                        | BCL11A                           | 1.88                        |
| QPCT                                                           | 2.22                        | TUBB3                           | 2.71                        | CYP2S1                            | 3.14                        | GPR68                            | 2.10                        |
| HS3ST2                                                         | 3.89                        | CD14                            | 1.10                        | SMPDL3A                           | 1.77                        | LILRB5                           | 1.68                        |
| CCL22                                                          | 2.80                        | BCL3                            | 1.26                        | CEBPD                             | 2.05                        | GJB2                             | 2.86                        |
| RFTN1                                                          | 2.11                        | NKG7                            | 2.94                        | PTGS1                             | 1.63                        | FAIM3                            | 2.07                        |
| MREG                                                           | 2.00                        | S100A8                          | 1.13                        | LILRB2                            | 1.59                        | ABP1                             | 4.72                        |

|          |      |         |      |              |      |          |      |
|----------|------|---------|------|--------------|------|----------|------|
| LY9      | 2.74 | TBC1D14 | 1.05 | C10orf54     | 1.53 | C15orf48 | 1.40 |
| TGFA     | 1.94 | NFKBIZ  | 0.98 | TACSTD2      | 2.75 | CCL3L3   | 2.20 |
| IL17RB   | 1.74 | PFKFB3  | 0.91 | SLC4A7       | 1.52 | MSC      | 2.24 |
| MST4     | 1.76 | EMR2    | 0.92 | IDO1         | 1.78 | AGPAT9   | 1.38 |
| PTGS1    | 1.63 | CTSL1   | 0.85 | ABP1         | 4.72 | CYP27B1  | 1.74 |
| HOMER2   | 2.69 | MYH11   | 1.28 | GIMAP7       | 1.84 | IER3     | 1.26 |
| TACSTD2  | 2.75 | CHSY1   | 0.80 | SPRY2        | 1.78 | CLEC5A   | 1.27 |
| SLC4A7   | 1.52 | RARRES1 | 0.86 | GAPT         | 1.52 | FSCN1    | 1.35 |
| FCRLB    | 4.38 | GNA15   | 0.71 | FPR3         | 1.34 | UCP2     | 1.14 |
| SLC22A16 | 2.43 | FAM129B | 0.67 | GPR82        | 1.74 | S100A8   | 1.13 |
| TRAF5    | 1.54 | OLFML2B | 6.30 | CLEC5A       | 1.27 | MXD1     | 0.98 |
| SLC26A11 | 1.48 | IGFBP4  | 1.44 | IL7R         | 1.20 | CACNA2D3 | 5.73 |
| GALM     | 1.53 | RASSF4  | 0.57 | CD14         | 1.10 | MARCKSL1 | 1.27 |
| CCL3L3   | 2.20 | CD163   | 0.55 | RASAL3       | 1.24 | SLAMF6   | 1.18 |
| CBS      | 1.65 | METTL7B | 4.09 | S100A8       | 1.13 | CCND1    | 1.81 |
| SLAMF1   | 1.94 |         |      | CRISPLD2     | 2.34 | ASGR1    | 1.30 |
| CYP27B1  | 1.74 |         |      | LOC100129550 | 1.00 | PEA15    | 0.83 |
| MAF      | 1.24 |         |      | ENTPD1       | 0.97 | IL1B     | 0.79 |
| GFOD1    | 1.61 |         |      | CACNA2D3     | 5.73 | NFKBIE   | 0.77 |
| ASNS     | 1.64 |         |      | RGS18        | 1.06 |          |      |
| IGF2BP2  | 1.58 |         |      | MARCKSL1     | 1.27 |          |      |
| PDGFB    | 1.34 |         |      | ARHGAP9      | 0.97 |          |      |
| TP53BP2  | 1.16 |         |      | ASGR1        | 1.30 |          |      |
| RAB33A   | 4.49 |         |      | ICAM3        | 1.00 |          |      |
| LHFP     | 3.97 |         |      | CLECL1       | 1.57 |          |      |
| DNMT1    | 1.00 |         |      | CD1D         | 0.99 |          |      |
| TMEM26   | 4.32 |         |      | ZNF467       | 2.41 |          |      |
| HOPX     | 2.66 |         |      | IL1B         | 0.79 |          |      |
| CH25H    | 1.55 |         |      |              |      |          |      |
| CTNNAL1  | 1.04 |         |      |              |      |          |      |
| MARCKSL1 | 1.27 |         |      |              |      |          |      |
| ITGAM    | 0.89 |         |      |              |      |          |      |
| RYBP     | 0.90 |         |      |              |      |          |      |
| PSAT1    | 1.18 |         |      |              |      |          |      |
| DNASE1L3 | 2.21 |         |      |              |      |          |      |
| LAD1     | 1.62 |         |      |              |      |          |      |
| SLC7A1   | 0.77 |         |      |              |      |          |      |
| TTYH2    | 0.96 |         |      |              |      |          |      |



|          |      |
|----------|------|
| KIAA1671 | 1.06 |
| CTNS     | 0.71 |
| SLC41A2  | 0.70 |
| PLDN     | 0.67 |
| CLEC10A  | 5.98 |
| FAM129B  | 0.67 |
| CD1C     | 6.30 |
| CD1E     | 6.36 |
| PIK3R1   | 0.64 |
| CHCHD10  | 0.79 |
| NDFIP2   | 0.69 |
| KCNK6    | 0.65 |
| CCRN4L   | 0.72 |
| SFT2D2   | 0.62 |
| CD1B     | 7.41 |
| SNX8     | 0.61 |
| MYC      | 0.62 |
| AP1B1    | 0.56 |
| F13A1    | 7.70 |
| PALLD    | 0.62 |
| NFIL3    | 0.52 |
| LYRM1    | 0.59 |
| ZWILCH   | 0.55 |
| AP2M1    | 0.51 |
| CLEC4A   | 0.51 |
| CKB      | 1.21 |
| CAMK1D   | 0.53 |
| CCDC90A  | 0.55 |
| C17orf58 | 0.65 |
| SRPK2    | 0.49 |
| BZW2     | 0.48 |
| CCL26    | 3.58 |

**Down-regulated transcriptional response after allergen challenge**

| <b>Suppressed by IL4 (concordant)</b> | <b>Log<sub>2</sub>[Post/Pre]</b> | <b>Suppressed by IL10 (concordant)</b> | <b>Log<sub>2</sub>[Post/Pre]</b> | <b>Induced by AZM (discordant)</b> | <b>Log<sub>2</sub>[Post/Pre]</b> | <b>Induced by MP (discordant)</b> | <b>Log<sub>2</sub>[Post/Pre]</b> |
|---------------------------------------|----------------------------------|----------------------------------------|----------------------------------|------------------------------------|----------------------------------|-----------------------------------|----------------------------------|
| HSPA6                                 | -3.06                            | CAMP                                   | -5.65                            | DDIT3                              | -2.61                            | GLDN                              | -2.52                            |
| CAMP                                  | -5.65                            | IL28RA                                 | -2.31                            | FAM89A                             | -2.30                            | RCAN1                             | -2.44                            |
| CES1                                  | -2.20                            | GCHFR                                  | -1.66                            | CES1                               | -2.20                            | CAMP                              | -5.65                            |
| ALDH2                                 | -1.98                            | ALOX5AP                                | -1.58                            | MLPH                               | -2.11                            | HPGD                              | -2.29                            |
| BOK                                   | -3.40                            | OAS1                                   | -1.50                            | EGR2                               | -2.07                            | FAM89A                            | -2.30                            |
| LDLR                                  | -1.81                            | IFIT2                                  | -1.42                            | LDLR                               | -1.81                            | C1QA                              | -2.21                            |
| PECAM1                                | -1.78                            | ACP5                                   | -1.40                            | SLC47A1                            | -1.79                            | LPL                               | -2.04                            |
| C21orf7                               | -2.04                            | IFIT3                                  | -1.38                            | ATF3                               | -1.77                            | THBS1                             | -1.87                            |
| FOLR3                                 | -2.10                            | IFIT1                                  | -1.31                            | SCD                                | -1.75                            | C19orf59                          | -1.87                            |
| GCHFR                                 | -1.66                            | SLC35E3                                | -1.25                            | HES2                               | -2.13                            | MTMR11                            | -1.98                            |
| ALOX5AP                               | -1.58                            | OAS2                                   | -1.00                            | PLIN2                              | -1.60                            | MMP19                             | -1.63                            |
| TMEM173                               | -1.61                            | GBP4                                   | -0.99                            | NUPR1                              | -1.70                            | PLIN2                             | -1.60                            |
| CFD                                   | -1.81                            | CYB5A                                  | -1.05                            | KLHL6                              | -1.42                            | TXNIP                             | -1.58                            |
| NUPR1                                 | -1.70                            | FAM46A                                 | -0.95                            | SQLE                               | -1.47                            | PKP2                              | -1.99                            |
| CXCL5                                 | -1.47                            | NT5C3                                  | -0.98                            | ZNF589                             | -1.44                            | ALOX5AP                           | -1.58                            |
| AZI2                                  | -1.42                            | PLAC8                                  | -0.90                            | HMGCS1                             | -1.32                            | CFD                               | -1.81                            |
| IFIT2                                 | -1.42                            | IFI44L                                 | -0.77                            | PHACTR1                            | -1.25                            | DHCR24                            | -1.53                            |
| IFIT3                                 | -1.38                            | HERC5                                  | -0.62                            | IRS2                               | -1.22                            | SORT1                             | -1.44                            |
| EMR3                                  | -1.43                            | IFI44                                  | -0.57                            | PSD3                               | -1.23                            | C1QB                              | -1.43                            |
| SLC11A1                               | -1.37                            | OAS3                                   | -0.56                            | ACOT4                              | -1.47                            | AZI2                              | -1.42                            |
| AKR1C3                                | -1.40                            | QPRT                                   | -1.05                            | BAMBI                              | -1.71                            | AKR1C3                            | -1.40                            |
| DEDD2                                 | -1.37                            | HLA-F                                  | -0.55                            | CYP27A1                            | -1.16                            | ZNF589                            | -1.44                            |
| DPEP2                                 | -1.46                            |                                        |                                  | PKD2L1                             | -1.36                            | ACACB                             | -1.32                            |
| GRN                                   | -1.32                            |                                        |                                  | GDF15                              | -1.74                            | IRS2                              | -1.22                            |
| C5AR1                                 | -1.31                            |                                        |                                  | IDI1                               | -1.12                            | KCNE1                             | -1.51                            |
| IFIT1                                 | -1.31                            |                                        |                                  | COL8A2                             | -1.12                            | SLA                               | -1.19                            |
| HK2                                   | -1.26                            |                                        |                                  | CCRL2                              | -1.09                            | SERPINE1                          | -1.43                            |
| ALOX5                                 | -1.25                            |                                        |                                  | P2RX7                              | -1.14                            | ABHD6                             | -1.34                            |
| LY86                                  | -1.25                            |                                        |                                  | CYGB                               | -1.88                            | ENPP4                             | -1.15                            |
| ID3                                   | -1.27                            |                                        |                                  | SPRY1                              | -1.10                            | TFCP2L1                           | -1.22                            |
| LTA4H                                 | -1.21                            |                                        |                                  | LGALS3                             | -1.01                            | VSIG4                             | -1.12                            |
| FCGR1A                                | -1.24                            |                                        |                                  | VWF                                | -1.37                            | FGD2                              | -1.11                            |
| CYP27A1                               | -1.16                            |                                        |                                  | TFRC                               | -0.99                            | SLC35E3                           | -1.25                            |
| VSIG4                                 | -1.12                            |                                        |                                  | KIF16B                             | -1.01                            | KLF4                              | -1.05                            |
| MGST1                                 | -1.16                            |                                        |                                  | WARS                               | -0.87                            | SLCO2B1                           | -1.02                            |

|           |       |           |       |          |       |
|-----------|-------|-----------|-------|----------|-------|
| GLRX      | -1.10 | PSEN2     | -0.93 | SPRY1    | -1.10 |
| OSM       | -1.13 | ARL4A     | -0.87 | RNASE4   | -1.12 |
| LYZ       | -1.09 | UBTD2     | -0.90 | C1QC     | -0.97 |
| ALDH1A1   | -1.08 | FAM134B   | -0.84 | EIF4A3   | -0.97 |
| GYPC      | -1.29 | DENND2D   | -0.80 | STOM     | -0.92 |
| RNASE4    | -1.12 | DHDH      | -2.00 | MFGE8    | -1.11 |
| CASP1     | -1.02 | FDX1      | -0.72 | KIAA0513 | -0.90 |
| C10orf58  | -1.08 | KLHDC8B   | -0.74 | DUSP1    | -0.87 |
| FANCE     | -1.47 | UPP1      | -0.73 | DENND4C  | -0.87 |
| GBP4      | -0.99 | OPTN      | -0.75 | ERGIC1   | -0.88 |
| VNN2      | -1.18 | SPIRE1    | -0.69 | PICK1    | -1.00 |
| CYB5A     | -1.05 | RTN4R     | -0.98 | SNX10    | -0.86 |
| CD300LF   | -1.00 | VAT1      | -0.64 | ARL4A    | -0.87 |
| RAB11FIP1 | -0.94 | FKBP15    | -0.64 | CNIH4    | -0.91 |
| HVCN1     | -1.01 | ACOT1     | -0.72 | TBC1D16  | -0.94 |
| FCGR1B    | -1.27 | SEPHS2    | -0.62 | FOS      | -0.77 |
| FPR2      | -0.95 | UGCG      | -0.60 | PRKCH    | -0.78 |
| S100A4    | -0.91 | ADCY3     | -0.59 | CFDP1    | -1.01 |
| COLEC12   | -0.88 | ATG4A     | -0.61 | KIAA0528 | -0.77 |
| HSD17B11  | -0.86 | SLC25A24  | -0.53 | OGFRL1   | -0.73 |
| SNX10     | -0.86 | AGPS      | -0.52 | PHF15    | -0.73 |
| HNMT      | -0.87 | DNASE2B   | -0.73 | GADD45B  | -0.70 |
| PLAC8     | -0.90 | C14orf109 | -0.55 | FZD4     | -0.92 |
| SCCPDH    | -0.86 | BCL2A1    | -0.49 | FILIP1L  | -0.67 |
| TLR7      | -0.85 | GPNMB     | -0.47 | ZCCHC6   | -0.62 |
| FAM113B   | -0.88 | LITAF     | -0.47 | SH3PXD2B | -0.62 |
| MLKL      | -0.83 | HES4      | -1.11 | ETS2     | -0.59 |
| GRINA     | -0.79 | CLIP4     | -0.46 | ALDH7A1  | -0.73 |
| IFI44L    | -0.77 | PTGR1     | -0.56 | TCN2     | -0.59 |
| KLHDC8B   | -0.74 | FBXO32    | -0.60 | ARMCX6   | -0.60 |
| NBPF3     | -0.86 | XBP1      | -0.44 |          |       |
| STX11     | -0.67 | RDX       | -0.43 |          |       |
| ADRB2     | -0.69 | TSKU      | -0.73 |          |       |
| GPBAR1    | -0.85 | GM2A      | -0.42 |          |       |
| CLEC12A   | -0.65 |           |       |          |       |
| DRAM1     | -0.62 |           |       |          |       |
| HERC5     | -0.62 |           |       |          |       |
| GPX3      | -0.62 |           |       |          |       |

|          |       |  |  |  |
|----------|-------|--|--|--|
| DNASE2   | -0.59 |  |  |  |
| FCGR2A   | -0.56 |  |  |  |
| SLC25A24 | -0.53 |  |  |  |
| TLR8     | -0.53 |  |  |  |
| MYD88    | -0.51 |  |  |  |
| SLC16A10 | -0.53 |  |  |  |
| NINJ2    | -0.70 |  |  |  |
| CMBL     | -0.99 |  |  |  |
| MEGF9    | -0.50 |  |  |  |
| TRIM22   | -0.49 |  |  |  |
| PLEKHG3  | -0.53 |  |  |  |
| TNFSF10  | -0.47 |  |  |  |
| MT1H     | -3.58 |  |  |  |
| MTHFS    | -0.64 |  |  |  |
| AGTRAP   | -0.51 |  |  |  |
| C3AR1    | -0.45 |  |  |  |
